# Supplementary material for: Direct Detection of Alternative Open Reading Frames Translation Products in Human Significantly Expands the Proteome
Source: PLoS One. 2013 Aug 12;8(8):e70698. doi: 10.1371/journal.pone.0070698 (PMC3741303; doi:10.1371/journal.pone.0070698)
Supplement: Database S5 — A database of alternative ORFs in Xenopus tropicalis . For each AltORF, the gene name and accession number of the mRNA in which it is encoded is provided in the first tab. Other information can also be found for both the reference ORF and the alternative ORF, including the reading frame and the coordinates of the start and stop codon (with respect to the first nucleotide of the mRNA). The predicted amino acid sequence of the alternative protein is also indicated. The second tab displays the results of alternative protein conservation analysis against human. The gene name and accession number for frog and human homolog proteins are provided, as well as standard BLASTP output, and similarity percentage. (XLSX) [file pone.0070698.s012.xlsx]

## Sheet: Xtropicalis
				altorf				reference
gene symbol	mRNA accession	altorf id	gene description	frame	start	end	strong kozak	frame	start	end	alternative protein sequence
rnf220.1	NM_001016196	7	Xenopus (Silurana) tropicalis ring finger protein 220 (rnf220), mRNA	3	680	800	no	2	112	1015	MKCHQQVMERAVNKKQCRKHAKTVTSKRSQKNLQSQRLKH
rnf220.1	NM_001016196	8	Xenopus (Silurana) tropicalis ring finger protein 220 (rnf220), mRNA	3	500	623	no	2	112	1015	MLMGMTLWNTERHSIQKQTLFHAQERSLEKPKKEKLFGEQF
rnf220.2	NM_001113927	11	Xenopus (Silurana) tropicalis chromosome 1 open reading frame 164 (c1orf164), mRNA	1	288	489	no	3	179	974	MLPYRANNHVLLVCQSQWIRKSIYLSLMVPIHSLQCTIAKVVCQGPSLIVTSHHPFFTFIHSLPLPI
LOC100492356	XM_002931472	38	PREDICTED: Xenopus (Silurana) tropicalis beta-1,4-galactosyltransferase 2-like (LOC100492356), mRNA	2	1084	1237	no	1	453	1575	MTVSFSVMWILSQWMTEIYIIAMNSHDILPLPWTSLDSDCLMQAILEGSLD
mast2	NM_001128649	52	Xenopus (Silurana) tropicalis microtubule associated serine/threonine kinase 2 (mast2), mRNA	2	673	910	no	1	141	6018	MDIQVTAHSTVHVTSLQMPPLTFHLFPLEGRMDAVGRWHLYLLPDMERTLLVPQFHHHAHPRKSCTSCHFSQQQMSFIS
mast2	NM_001128649	54	Xenopus (Silurana) tropicalis microtubule associated serine/threonine kinase 2 (mast2), mRNA	2	3493	3619	yes	1	141	6018	MASLCEPFVSTWEKVMSTLSITWCGMSKKMVQLMMLGSEKVI
LOC100493907	XM_002931403	97	PREDICTED: Xenopus (Silurana) tropicalis diencephalon/mesencephalon homeobox protein 1-B-like, transcript variant 1 (LOC100493907), mRNA	2	97	241	no	1	0	1086	MHQTTGLLYMHLLWPRDWLTSFWKPVMDPSTENRDAVALHSQHSNWKL
LOC100493907	XM_002931404	99	PREDICTED: Xenopus (Silurana) tropicalis diencephalon/mesencephalon homeobox protein 1-B-like, transcript variant 2 (LOC100493907), mRNA	2	97	256	no	1	0	1101	MHQTTGLLYMHLLWPRDWPAVHFKTSFWKPVMDPSTENRDAVALHSQHSNWKL
cyp4b1	NM_001126601	116	Xenopus (Silurana) tropicalis cytochrome P450, family 4, subfamily B, polypeptide 1 (cyp4b1), mRNA	3	908	1088	no	2	16	1546	MKKAMVYLMMTSVQRWTHLCLRAMTQLPVESPGSYTVWPNTQSTSRSVGRRLRKSWETDR
cyp4b1.2	NM_001017348	121	Xenopus (Silurana) tropicalis cytochrome P450, family 4, subfamily B, polypeptide 1 (cyp4b1.2), mRNA	1	984	1206	no	3	8	1553	MIPHLVEYPGSYIVWLHIQNTSRNAGRRSVKPWGSGKPWNGMTLTGCLIPQCALRKVCAYILQSHPYPGSLPNQ
LOC100487918	XM_002931446	125	PREDICTED: Xenopus (Silurana) tropicalis cytochrome P450 4B1-like (LOC100487918), mRNA	2	907	1186	no	1	0	1548	MKMGRVYLMRISVQRWTHSCLRAMTQQPVGSLGSYTVWPNTQSTSRNVVRRSETYLEKRSLLNGRILTKYPIPQCASRRVSVFILQSQLCQGN
LOC100488078	XM_002931447	129	PREDICTED: Xenopus (Silurana) tropicalis cytochrome P450 4B1-like (LOC100488078), mRNA	2	664	904	no	1	0	1326	MSKMSLRRSNRRDTWTSLISFCVPRMKMERVYLMRISVQRWTHLCLRVMTQQPVGSLGPYTAWPSTQSTSRNVGRRSGMS
LOC100488227	XM_002931448	132	PREDICTED: Xenopus (Silurana) tropicalis cytochrome P450 4B1-like (LOC100488227), mRNA	2	814	997	no	1	0	1527	MKPNWTKSARKGTWTFLIFFFLQRMKMGRVYLMRISVQRWTHSCLQAMTQQPVGSPGSYIV
LOC100488703	XM_002931451	174	PREDICTED: Xenopus (Silurana) tropicalis UPF0632 protein A-like (LOC100488703), mRNA	2	181	370	no	1	0	1557	MCLIQEFGISYPKTPKRRFMTATVYTLNWTSLTHTLFQLWQTVRCFHRGKTYRMCCPGICTGD
slc5a9	XM_002931413	179	PREDICTED: Xenopus (Silurana) tropicalis sodium/glucose cotransporter 4-like (LOC100495397), mRNA	1	300	663	no	2	16	2053	MECIMGTGCSWMDLCTSLYCFWSGYHARVPEETFWRKKDTYLHICAFPYSLYIHQDIDRYLLWRSLHSSIFGLEHLLIHCDITGSNSNLHNSWWADCSDLYRHLTDCHHGGWCLCAHVHIF
agbl4	XM_002931415	187	PREDICTED: Xenopus (Silurana) tropicalis cytosolic carboxypeptidase 6-like (LOC100495721), mRNA	1	138	267	no	3	5	1448	MPALKVVTLEGLTIFLNLNMTCLLDLIPVTHAFEFGSTSQWKT
elavl4	NM_001103055	199	Xenopus (Silurana) tropicalis ELAV (embryonic lethal, abnormal vision)-like 4 (Hu antigen D) (elavl4), mRNA	2	1141	1315	no	1	39	1239	MMKLQWPLPALMDIAWVTEFCKFPLKPTKPTSLEFLAYTDHPNLMNKMKMKKQTLNGL
LOC100489027	XM_002931452	221	PREDICTED: Xenopus (Silurana) tropicalis calreticulin-like (LOC100489027), mRNA	2	82	271	yes	1	0	1311	MEMIGKKGGLNQKTNQIWENSNFLQANFLAIQKRIKVCKQARMESFMLSLQNLSHSVMRDRPW
osbpl9	NM_001078816	224	Xenopus (Silurana) tropicalis oxysterol binding protein-like 9 (osbpl9), mRNA	1	2088	2226	no	3	35	2252	MQQLRRSTAWKKNREQKQESAKRRKSSGRPGCSMRMVSAGCMMNLC
osbpl9	NM_001078816	225	Xenopus (Silurana) tropicalis oxysterol binding protein-like 9 (osbpl9), mRNA	1	1074	1413	no	3	35	2252	MGQMKQNSLTLMMTVMMTGKESLWKSTKVSSCTFCPRSVWEWTSLRLYFPPSFLNEDLSWKCMQISLHTQICLSALVNIKILKTEWHRWSSGTYLLFMLAGKDQLQRSLTIPS
LOC100489182	XM_002931453	239	PREDICTED: Xenopus (Silurana) tropicalis nardilysin-like (LOC100489182), mRNA	3	683	830	no	2	46	3226	MQLKGKWRLLIVNSRLDDLMTPIEDKCFLQALPSLVTLWLSFPGEMLRP
rab3b	NM_001100276	242	Xenopus (Silurana) tropicalis RAB3B, member RAS oncogene family (rab3b), mRNA	3	437	647	no	2	133	784	MILPAKVPIMLYRTGPPKLKHIPGTMHRSFWWEINVTWKRKGLLLQKKESTSLISWALSSSKLVQKKTSR
prpf38a	NM_001017140	256	Xenopus (Silurana) tropicalis PRP38 pre-mRNA processing factor 38 domain containing A (prpf38a), mRNA	3	572	1103	no	2	7	943	MMWSPVKRKRMRMKRVEILLPNITEEIIETLTDHVDLPLLVTEEAVVVHQEDAVALLKGEVLLHLVGKDIGAKAQGVIGVGLERDDTDPNPNLQDIIEVTGTEVTPSHLRGQRKVIRRAEEGMSNKKIMYFLQSRTFLYIIQGFVAFGTMNNSGMLLNDWSFDCFYFFFLINCSLLV
ssbp3	NM_203877	341	Xenopus (Silurana) tropicalis single stranded DNA binding protein 3 (ssbp3), mRNA	3	452	812	no	2	385	1561	MSMNTCFMLGPRNLHRHSCLRYDGRRISLWGNLQASYTPGGAYSGTCTVLLLRGEIPVNIQVKQKLFMIIVQQRLQVQCLGTFLQVTECLEDQFHQDSSSRVLLGHNHHLIHSLLLTTPT
LOC100485305	XM_002931435	388	PREDICTED: Xenopus (Silurana) tropicalis roquin-like (LOC100485305), mRNA	1	822	954	yes	3	179	3548	MDLRSHGKSLFYLWCRDSNHGSPKPRKLALGMLSSCSTEPLALR
astn1	NM_001079054	441	Xenopus (Silurana) tropicalis astrotactin 1 (astn1), mRNA	3	2648	2786	no	2	43	3949	MALRSHVLSGILTDKCKDSSGLNLKTSAKVIPLQMSQRSERETQKC
sf3b1	XM_002931523	459	PREDICTED: Xenopus (Silurana) tropicalis splicing factor 3b, subunit 1, 155kDa (sf3b1), mRNA	3	779	1139	no	2	88	3994	MKLLGVPKETRLLEQHQDLKFGTLHQVILHLVLLHLAEGILQVMQHQVTVVQHLVQGKTDGMRLPKQNGILLVMAVDGLRHLEQIVEGILLVKLQHREQVKENPAGMKPLLVRWVVVLQF
itgav	NM_001123449	466	Xenopus (Silurana) tropicalis integrin, alpha V (vitronectin receptor, alpha polypeptide, antigen CD51) (itgav), mRNA	2	517	667	no	1	417	3150	MLHVDQMQKLMLKNKDFVKVDLVLILLRTTEFFLEVLAVFIGKVSLFQTK
actb	NM_213719	482	Xenopus (Silurana) tropicalis actin, beta (actb), mRNA	1	684	879	no	3	32	1157	MLLWTLSRRWPQLLLLHHWKRVMSCLMDKLSPLVMSGLDVQKHSSSLLSLVWNPVAFMKPLTTQL
fscn1	NM_203797	490	Xenopus (Silurana) tropicalis fascin homolog 1, actin-bundling protein (fscn1), mRNA	1	240	456	yes	3	41	1493	MAKCRGRVRLLDPSAGSWSVRRGTGVGRCSPRRTAGTSEVQRIELVVSLLRFPLPRSGEFTWPCTHSSHYIA
LOC100491582	XM_002931494	497	PREDICTED: Xenopus (Silurana) tropicalis e3 ubiquitin-protein ligase SMURF1-like (LOC100491582), mRNA	2	1300	1549	yes	1	0	2193	MDFSNILQTIFILCKLILIHLLIQIIYLISILLVESWDWLCFMDTTLMGGLQFLSTNNFWESPFSCLTWNLWIQSCIKAWFGF
LOC100491582	XM_002931494	498	PREDICTED: Xenopus (Silurana) tropicalis e3 ubiquitin-protein ligase SMURF1-like (LOC100491582), mRNA	2	682	817	no	1	0	2193	MGTSHRTCLKVMNKELRFKGRCISCTHKLVSAHGMIPEYQETLTV
asnsd1	XM_002931525	531	PREDICTED: Xenopus (Silurana) tropicalis asparagine synthetase domain containing 1 (asnsd1), mRNA	3	41	245	yes	3	272	2102	MELREQKIVISELSNLKKGRKVYIQQGNSNIFFLADRSQTFSECKKKLDDMIHTQQELEDSIQTPVNK
LOC100492754	XM_002931500	544	PREDICTED: Xenopus (Silurana) tropicalis collagen alpha-1(II) chain-like (LOC100492754), mRNA	1	3060	3276	yes	3	71	4160	MEKLVRGGKKVIEVLQACKAFRDLQVQLVNKVVLDLLDLLAPEAPLDLLALLVKKVMQDHLDQLDLLVFEEL
col3a1	NM_001142907	556	Xenopus (Silurana) tropicalis collagen, type III, alpha 1 (Ehlers-Danlos syndrome type IV, autosomal dominant) (col3a1), mRNA	2	1765	2422	no	1	114	4518	MANQDPKDLLENLDVLVPLVHLVQEVSLVLWDFLVQRVMRVNLAKMEKKEVLDHLDLREFLERVVTQVHKVLLGLEVQQVKEENQEQLVHQDFRAYLELLDPLERMGNQEKPDQKVKMDFQELLVVKVKMVSLEREVLRVPQDLQDPGVVLVPLVQMVPRALLAHLVHLVQWVHLVFKVCLEKGEDLAVLVPRVKRVNLVAKVVMELLDKMGQGVLLVL
col3a1	NM_001142907	557	Xenopus (Silurana) tropicalis collagen, type III, alpha 1 (Ehlers-Danlos syndrome type IV, autosomal dominant) (col3a1), mRNA	2	2575	3733	yes	1	114	4518	MESLEPKVKKVVLGSVESLVVQELLVLKVDLDLLVILVLKEVKETVVLQEQLVQLVFLVLVGCLVLLDLTAMQVLLALLEAQEKMDLQVQLAVLVLQETLVEQVQRVNQANKEKEVHLVVVEKWVPQVLPAFLALLVLVVLLDCPACKADQVLLAFQVIRVRMENLVPMDLLVNVVLLVLLDRLGLMGLLEKVEETAMLVLMVCLDVMVPMVLKEIGVKTDLQVPLELQAILVLQVLLALLESQEIEEKMVRLVLQALLALLVLVVLLDPKDHVVTKEKLASVVQMESKVIVATLVILVYLVLLEPQENKVLLEAKANRVQEDHLDLMELLERMVPVDTLVPLGPLDLGVVEEKMVQRDHLVNQVPQVNLDPLALLVHVVMVVELS
col3a1	NM_001142907	563	Xenopus (Silurana) tropicalis collagen, type III, alpha 1 (Ehlers-Danlos syndrome type IV, autosomal dominant) (col3a1), mRNA	2	4117	4276	no	1	114	4518	MVDFSLAMEMQSFLRMFQKFRWHSYEFFLAELPRTLLIIARTALHTWMGKMGM
scaf8	XM_002931528	573	PREDICTED: Xenopus (Silurana) tropicalis RNA binding motif protein 16, transcript variant 2 (rbm16), mRNA	1	3435	3765	no	3	83	3896	MMKGIIMETLDRSIEILQTGTEGLNKLNIGILMTVVTHGKDRLIGMKEILISVEKLMVTLLEERDSPKTGHLHSLSHMLLSISQRPLLLRTVATLKLMEKKQRLAIKKKL
scaf8	XM_002931528	574	PREDICTED: Xenopus (Silurana) tropicalis RNA binding motif protein 16, transcript variant 2 (rbm16), mRNA	1	207	357	no	3	83	3896	MLFKVLRNSSRSASQNIRFLDYMSLIQLSVNPDISLVKIRIFLHPGLAIT
scaf8	XM_002931527	582	PREDICTED: Xenopus (Silurana) tropicalis RNA binding motif protein 16, transcript variant 1 (rbm16), mRNA	1	3435	3765	no	3	83	3896	MMKGIIMETLDRSIEILQTGTEGLNKLNIGILMTVVTHGKDRLIGMKEILISVEKLMVTLLEERDSPKTGHLHSLSHMLLSISQRPLLLRTVATLKLMEKKQRLAIKKKL
scaf8	XM_002931527	583	PREDICTED: Xenopus (Silurana) tropicalis RNA binding motif protein 16, transcript variant 1 (rbm16), mRNA	1	207	357	no	3	83	3896	MLFKVLRNSSRSASQNIRFLDYMSLIQLSVNPDISLVKIRIFLHPGLAIT
mllt4	XM_002931502	602	PREDICTED: Xenopus (Silurana) tropicalis afadin-like (LOC100493083), mRNA	1	3447	3582	no	3	968	6434	MNWLEVMAEKFSLRRILICNSLSFCLKMVIHVMWLEIFLMAFKSF
cog2	XM_002931481	636	PREDICTED: Xenopus (Silurana) tropicalis conserved oligomeric Golgi complex subunit 2-like (LOC100488973), mRNA	1	777	933	no	3	14	2201	MNSMYNLTPVVCMLCTVSFWNLFLIIVDYFEKSQVALYQVKTQIRYLAMTFW
synj2	NM_001142039	660	Xenopus (Silurana) tropicalis synaptojanin 2 (synj2), mRNA	1	1266	1458	no	3	596	5255	MMMDMCLTLLKQSRLYTWMMTFPPLFKSEAPFQCFGNNQGCRLALTILNLPEDLRPMPQHLTGI
synj2	NM_001142039	661	Xenopus (Silurana) tropicalis synaptojanin 2 (synj2), mRNA	1	2859	3069	no	3	596	5255	MINFNFKSLQAKSLKTSMREPFTLDLRTSMTLAQKHMTQVKSVAHQPGQTEFFGGERNGHLRNQQETLIF
LOC100489334	XM_002931482	666	PREDICTED: Xenopus (Silurana) tropicalis probable palmitoyltransferase ZDHHC14-like (LOC100489334), mRNA	3	2273	2444	no	2	1258	2680	MDLPSLKAICVTKTSAFRAPNSFCRPQLHHFFRMSPLLPATNCHCLERLPYMHRVPL
arid1b	XM_002931507	669	PREDICTED: Xenopus (Silurana) tropicalis AT-rich interactive domain-containing protein 1B-like (LOC100493908), mRNA	2	4381	4594	no	1	0	6600	MTTSGHPMAINGSLHICLPLQLCSQSQELLHHLIRPLHRCQIIFPELPVQHLFSAPWRIVCRLASLLFCLP
arid1b	XM_002931507	670	PREDICTED: Xenopus (Silurana) tropicalis AT-rich interactive domain-containing protein 1B-like (LOC100493908), mRNA	2	3847	4336	no	1	0	6600	MGLEAMTGDMNLMDSSILDKDHLLDNHHMQDTSQECTPSNRTTRDIWIACMFLKPSVMKAICTICSMAASNKICIISMEIHILAKKGVPYKDSIHIHTTERECKVQDKCNNTAWGLSLWEDPCSPQQVKVLNKICGHHEMTCLIHTKLGKAPQAQHRQGHTQP
arid1b	XM_002931507	673	PREDICTED: Xenopus (Silurana) tropicalis AT-rich interactive domain-containing protein 1B-like (LOC100493908), mRNA	2	7594	7801	no	1	0	6600	MYKFMLYFGSAAGHFAFWSQCGISCLPTELDNGYIIQIKVKSILWMKQQNFWGFFSDKIQHICISRNCS
arid1b	XM_002931507	677	PREDICTED: Xenopus (Silurana) tropicalis AT-rich interactive domain-containing protein 1B-like (LOC100493908), mRNA	2	6001	6151	no	1	0	6600	MACYTGWCVHLRRHRILSRLWGPFLSFPLRDLCWKHCVNLVYRTTMWILY
kif26b	XM_002931509	686	PREDICTED: Xenopus (Silurana) tropicalis kinesin family member 26B (kif26b), mRNA	3	2831	3125	yes	2	970	6268	MASHQGFICVRTQYVACSCRTRANCGLPQQRKQPSFWMQPLPHEGAVNETVMKMTIETHTCCLLCISISIAWKRVEKEACQEVAADYILLIWGAVSKC
memo1	NM_001004925	710	Xenopus (Silurana) tropicalis mediator of cell motility 1 (memo1), mRNA	2	361	568	no	1	117	1008	MWLFLDVHFPLLIYIEHHYMIFILIKRYTETCGRQGCLNECHYKQMKMSTALKCIYLTLLKQWKAIRMI
LOC100494997	XM_002931513	724	PREDICTED: Xenopus (Silurana) tropicalis thrombospondin-2-like (LOC100494997), mRNA	2	982	1210	yes	1	0	3234	MDVFLQIMKTGLWTAAQNALVRIQKQFVNKLLALQCIVPAQLSMKESVALCASVSASYQWIVKLAGLHGLSGQNVL
LOC100494997	XM_002931513	725	PREDICTED: Xenopus (Silurana) tropicalis thrombospondin-2-like (LOC100494997), mRNA	2	2608	2965	no	1	0	3234	MKTLMKMVTRTIWTIALTFLMQTKLTMIRMVEGTHVIRMMTMMVFLMTETTVDLFIILTKRTLMVMVGVMLARMTLIMTAYQIYLMCALKTVTLAKLTSGNFRWYLWIQRELHRLIPTG
LOC100494997	XM_002931513	726	PREDICTED: Xenopus (Silurana) tropicalis thrombospondin-2-like (LOC100494997), mRNA	2	2119	2272	no	1	0	3234	MDGPIITWSALPMPLTIVLKIIALSCQIQGKRTLIRMELVMLVTKMMTMMA
LOC100494997	XM_002931513	728	PREDICTED: Xenopus (Silurana) tropicalis thrombospondin-2-like (LOC100494997), mRNA	2	3058	3199	no	1	0	3234	MKGSRSWRTQALFMTRHMLVDDWASLFSLKKWFTSLILNMNVKAWFP
phf10	NM_001030472	745	Xenopus (Silurana) tropicalis PHD finger protein 10 (phf10), mRNA	2	529	658	no	1	228	1518	MKYVIRMKQGNKCNNKTHRRLKQAKFLSTLRKLPRKPQNSTAT
dll1	NM_001100219	767	Xenopus (Silurana) tropicalis delta-like 1 (dll1), mRNA	1	1065	1629	no	3	521	2684	MNTTTGKAALTTAVPEMMLLVIFPAVKKERNCATLDGRACTAQNQFVCLDVMNIMDIVTSLGNANAELVGKADTVMNAFVTQGACMAPASNHGNATAKKAGEDFSVTKILTTAPTTSHAKMEPHAPTLAKEATLAPAVLGTLAPTVKSKSMNVMQTLARMEAAALTWKTAIHVPAHQASMAKTVNSVL
LOC100490969	XM_002931491	779	PREDICTED: Xenopus (Silurana) tropicalis tripartite motif-containing protein 67-like (LOC100490969), mRNA	2	1906	2029	no	1	0	2202	MIKLGQCMWIIIEAGLCTATLIPTGQKVVCARELQLVFFWI
LOC100490969	XM_002931491	781	PREDICTED: Xenopus (Silurana) tropicalis tripartite motif-containing protein 67-like (LOC100490969), mRNA	2	1510	1717	no	1	0	2202	MMEMVVPLGKFTWARKPYARLMGFTLIARIMQESRPLIPQDLDLIARLLFCKHLMWPFLPLTLTLHIET
pabpc1	NM_001005051	840	Xenopus (Silurana) tropicalis poly(A) binding protein, cytoplasmic 1 (pabpc1), mRNA	2	841	985	no	1	366	2268	MACFLMTAKYLLGALSPAKSVKLSLVPEPRNLQMCTSKILEKTWMMSV
ncald	NM_001129941	850	Xenopus (Silurana) tropicalis neurocalcin delta (ncald), mRNA	2	709	1027	no	1	288	867	MSQHQRKGQRKYFGKWIPTEMANSPWKNSSEGQKVTRPSCASFSAIRAVLDSSETVCIIISVRSFYFILPKLHLLLCSHFCGQKYLPFVISVCLFFFWITKNGEFC
ubr5	XM_002931533	864	PREDICTED: Xenopus (Silurana) tropicalis e3 ubiquitin-protein ligase UBR5-like, transcript variant 2 (LOC100490232), mRNA	2	4834	4963	no	1	324	8700	MLCRAVRNCFLWSLYLQDLRLISLTVRISPSHPISLGILSKEE
ubr5	XM_002931533	865	PREDICTED: Xenopus (Silurana) tropicalis e3 ubiquitin-protein ligase UBR5-like, transcript variant 2 (LOC100490232), mRNA	2	3811	3988	no	1	324	8700	MQTTLLSMYFAAMIPAVLHGQELNISTRIYLNVEHVACWNPCAVVLNVLEFATKVMTAN
ubr5	XM_002931532	873	PREDICTED: Xenopus (Silurana) tropicalis e3 ubiquitin-protein ligase UBR5-like, transcript variant 1 (LOC100490232), mRNA	2	4834	4963	no	1	324	8700	MLCRAVRNCFLWSLYLQDLRLISLTVRISPSHPISLGILSKEE
ubr5	XM_002931532	874	PREDICTED: Xenopus (Silurana) tropicalis e3 ubiquitin-protein ligase UBR5-like, transcript variant 1 (LOC100490232), mRNA	2	3811	3988	no	1	324	8700	MQTTLLSMYFAAMIPAVLHGQELNISTRIYLNVEHVACWNPCAVVLNVLEFATKVMTAN
atp6v1c1	NM_203841	884	Xenopus (Silurana) tropicalis ATPase, H+ transporting, lysosomal 42kDa, V1 subunit C1 (atp6v1c1), mRNA	3	803	974	no	2	202	1348	MKPSLRWLFLDPAMFFQKTRTVTSVMSLCSGKLWMTSGTKQEKISLLSVTSSTTKRK
dcaf13	NM_213693	914	Xenopus (Silurana) tropicalis DDB1 and CUL4 associated factor 13 (dcaf13), mRNA	3	170	320	no	2	34	1369	MPPSWSVSLQNPLLPPWTAIEMGLIALLSIPRAYLLCCQEPVMERLRFGI
rims2	XM_002931562	918	PREDICTED: Xenopus (Silurana) tropicalis regulating synaptic membrane exocytosis 4 (rims4), mRNA	2	2554	2689	no	1	0	4608	MMSHIGTSYRRMMCLHCHFHTHPRSCKEGSCTARAQPGGCKDPKG
rims2	XM_002931562	922	PREDICTED: Xenopus (Silurana) tropicalis regulating synaptic membrane exocytosis 4 (rims4), mRNA	2	4597	4795	no	1	0	4608	MLVHSICEKQLVCATSVTKNVKSQQNKNNRSQTLVNTACLMLCLLSLFLGIPSDPVFSEEVAHIVR
LOC100491530	XM_002931540	931	PREDICTED: Xenopus (Silurana) tropicalis low-density lipoprotein receptor-related protein 12-like (LOC100491530), mRNA	3	1439	1583	no	2	376	2917	MQPEGLMQHIRWMASACLGRYLVVATGAVTLNSSDVMATGIAQMAGMS
LOC100491530	XM_002931540	935	PREDICTED: Xenopus (Silurana) tropicalis low-density lipoprotein receptor-related protein 12-like (LOC100491530), mRNA	3	1628	1820	yes	2	376	2917	MVSVTHVQTGATTRTIALMALMRKTATSVSRETSIVKITAVSLKAGSVILRMTAGTAAMRRIAP
zfpm2	XM_002931563	940	PREDICTED: Xenopus (Silurana) tropicalis zinc finger protein ZFPM2-like (LOC100495723), mRNA	2	259	487	no	1	0	3537	MWSFSVIKGMKKAAMVQTSQTGKCKQKKRVKPKQNRKAGMDQESWSCARRTASAGSTLASSFHLEQLGGRSLARWI
LOC100492148	XM_002931544	978	PREDICTED: Xenopus (Silurana) tropicalis myoneurin-like (LOC100492148), mRNA	1	1110	1356	no	3	56	1898	MLGPIQERSHISAKNVTKALLRSASWCSIAECITEKKNRINVMCVIYSLQHPAISKFMQENTVEKSHMCVTDVANDLPRPAL
LOC100492148	XM_002931544	979	PREDICTED: Xenopus (Silurana) tropicalis myoneurin-like (LOC100492148), mRNA	1	1449	1608	no	3	56	1898	MQGNIQGRSHIYVESAGRVLFLRGSLISTSGLIQEKGHLSVRCVEIHTLMLKI
prkci	NM_001012689	1004	Xenopus (Silurana) tropicalis protein kinase C, iota (prkci), mRNA	2	499	667	no	1	105	1869	MVTLSRPRDLTGERTAPSALTEYGGWDVRAINASTVNCLFIRNVTSLFPLNVADTQ
LOC100493085	XM_002931549	1017	PREDICTED: Xenopus (Silurana) tropicalis probable cationic amino acid transporter-like (LOC100493085), mRNA	2	1534	1669	no	1	453	2757	MQWLVMGFCSSFWPMSVPIQRLQSWPVLSQDSLQAFCLCWSAFVI
LOC100493085	XM_002931549	1021	PREDICTED: Xenopus (Silurana) tropicalis probable cationic amino acid transporter-like (LOC100493085), mRNA	3	2231	2537	yes	1	453	2757	MVGYPPGCFDGPAALCLGVCNPTTTRKPQKAAVHGTMRPICPCFCHAGKCVSHAETVINHMDSLCYLVFCWPVDLFWLRHVEQHLRNQRQRGGSPSKHISTL
tnik	XM_002931550	1031	PREDICTED: Xenopus (Silurana) tropicalis TRAF2 and NCK-interacting protein kinase-like (LOC100493253), mRNA	2	361	481	yes	1	264	4317	MELMDKFTRVAMLKLDSLQLLKSWTSQGMKKKRSNKRLIC
tnik	XM_002931550	1035	PREDICTED: Xenopus (Silurana) tropicalis TRAF2 and NCK-interacting protein kinase-like (LOC100493253), mRNA	2	3892	4030	no	1	264	4317	MLILAIHMTSIFHLIFRVTSPHMLLLYYQKQMAWRCSCAMRMRVFM
tnik	XM_002931550	1036	PREDICTED: Xenopus (Silurana) tropicalis TRAF2 and NCK-interacting protein kinase-like (LOC100493253), mRNA	2	3124	3304	no	1	264	4317	MNMAWQTTPKPPSLLLLIQEFIRLPPLTMTMKRMKMMMTMKRHPQQPCLLANFLDKNKPS
LOC100497136	XM_002931569	1046	PREDICTED: Xenopus (Silurana) tropicalis transmembrane protein 212-like (LOC100497136), mRNA	3	116	365	no	1	0	561	MECSDCLSNLEWSSGTYCWYSYTSGLQRMDKKITVGSYIYLYITKCHRNTSSVGTGHCFHPYWPILLLYLCWSFINQLHWICN
LOC100497620	XM_002931571	1050	PREDICTED: Xenopus (Silurana) tropicalis fibronectin type III domain-containing protein 3B-like (LOC100497620), mRNA	1	105	237	no	2	109	3460	MNVRHNDDDRPNATGSATHAEWGGSDDAASTKWRWITAGHSSSG
znf639	NM_001006815	1086	Xenopus (Silurana) tropicalis zinc finger protein 639 (znf639), mRNA	3	764	962	no	2	97	1267	MWQMLTSMTSCTGVSNVTCSFVQVVNFTFTSKSIAVTNNTCVSSVSMRPMIQKICTAMLLMNTRAG
mfn1	NM_001016189	1092	Xenopus (Silurana) tropicalis mitofusin 1 (mfn1), nuclear gene encoding mitochondrial protein, mRNA	1	684	816	no	3	11	2225	MRNFLSLIYSSLIIAGMPLRLNQSIWKMYVNNTWNVASRFLWMN
gnb4	NM_001016952	1094	Xenopus (Silurana) tropicalis guanine nucleotide binding protein (G protein), beta polypeptide 4 (gnb4), mRNA	1	711	879	no	3	98	1118	MLHLSFGTSEMGCAGSHSLDTYLILMQYASFPMDTRLRLALMMLPVDCLTCAPTRN
LOC100485205	XM_002931579	1110	PREDICTED: Xenopus (Silurana) tropicalis zinc finger protein Xfin-like (LOC100485205), mRNA	2	193	901	no	1	75	3000	MSVRNISVIRKAFINTKEPTKERNFFLVLIVRDVFQTDLTSIVIKGLTQGRNHFLVLNVGNVFQPDLNSIFIKGLTQGRNHFLALNVENGSQVNLIVIVIKGSTQGRNHFLVLNVGNVFQPDLNSNVIKGLTQGRNHILVLNVENVSQGNFIVIVIKGPTQGRNHFLVLNVENVSQCNPALKLTKEPTQGRNHFLVLNVGNVFQSNTTLKFIIQTTQGRNHFYVLNVGNVFHSNPT
LOC100485205	XM_002931579	1111	PREDICTED: Xenopus (Silurana) tropicalis zinc finger protein Xfin-like (LOC100485205), mRNA	2	2236	3004	no	1	75	3000	MSVINTLVIRETFINTKELTKERNSFLVLIVRDVFQTDLTSIVIKGLTQGRNHFLVLNVRNVFQPNLNSIFIKGLTQGRNHFLVLNVENGSQVNLIVIVIKGSTQGRNHFLVLNVGNVFQPDLNSNVIKGLTQGRNHILVLNVKNVSQGNFLVIVIKGSTQGRNHFLVLNVENVFQTNPSLKLTLEPTQGGNHILVLNVGNVFQRNAALKFTKEPTQGRNHFLVLNVGNVFHSNATLKFIMQTTQGKNHFYVLNGX
LOC100485205	XM_002931579	1112	PREDICTED: Xenopus (Silurana) tropicalis zinc finger protein Xfin-like (LOC100485205), mRNA	3	1550	1688	no	1	75	3000	MFSMWEMFFTPIRIESSLWNPHRGETIFMFSMWEMFFTAIRPESSL
zswim5	NM_001097236	1143	Xenopus (Silurana) tropicalis zinc finger, SWIM-type containing 5 (zswim5), mRNA	3	2021	2270	no	2	64	3538	MLRIKCVAMRSKSLADFRNWNLMPYWYRHSASNVSCCWKEAHSVVLGKSYIERACLCIPLPNIYSQHCCHMIQIWPINCRSEQ
hectd3	NM_001079029	1148	Xenopus (Silurana) tropicalis HECT domain containing 3 (hectd3), mRNA	1	1713	1968	no	3	191	2726	MSNGGSVNLLQKELLIKGEVLGTVWLIYLRSFAQVLLIYLFHYHFLYALQTRVTELGKHKTCMCQIHHVRTWQNMSGLDNLWEQH
ipo13	XM_002931583	1196	PREDICTED: Xenopus (Silurana) tropicalis importin-13-like (LOC100493086), mRNA	1	1500	1734	no	3	470	3332	MKLLAHSRSHSGTVCKMTSSHSRLRNRQCTCRCIDQSTFSWWMCCYRRLSFLQMRSMLPGRLMRRNNFVSTGWIYPTH
LOC100493254	XM_002931584	1214	PREDICTED: Xenopus (Silurana) tropicalis receptor-type tyrosine-protein phosphatase F-like (LOC100493254), mRNA	2	5944	6163	no	1	567	6309	MHGMANLVQLDNSSSLIGLNKECQKQVKALLTSLGRCTKPRSSLGRMGQSPFTAALAWGALEYSSLSVLYWSV
LOC100496664	XM_002931604	1263	PREDICTED: Xenopus (Silurana) tropicalis tyrosine-protein kinase receptor Tie-1-like (LOC100496664), mRNA	2	415	637	no	1	0	2847	MVGYVMTAVESVSVHQVLWEQDVKRLVLMGNMVQIVPCSVNVKMVALVTGLVAVYAPQDGMGSTARNQTGYHRS
LOC100496664	XM_002931604	1265	PREDICTED: Xenopus (Silurana) tropicalis tyrosine-protein kinase receptor Tie-1-like (LOC100496664), mRNA	2	2071	2323	no	1	0	2847	MTTETLQGNWKSYVNWVIILISSTFWEPVRIEVTSTLLLNMLLMVISLTSYGRVEFLKQTLYLPRSMGLLPRLPPSNYYSLPLM
ppap2b	NM_001016858	1287	Xenopus (Silurana) tropicalis phosphatidic acid phosphatase type 2B (ppap2b), mRNA	2	817	967	no	1	336	1257	MSAIQTSAQLTAAWDTLKIINAEGLQTKSWKPENHFSLATLHFPCTRCCT
mysm1	NM_001110765	1315	Xenopus (Silurana) tropicalis myb-like, SWIRM and MPN domains 1 (mysm1), mRNA	1	225	411	no	3	176	1391	MNPAKVFMTASVLDLLLSTTLNQSGRMKALIHGHWTVQSVKKTEKQLRKCCLRNNIIYLTSH
LOC100498088	XM_002931611	1336	PREDICTED: Xenopus (Silurana) tropicalis nuclear factor 1 A-type-like (LOC100498088), mRNA	2	1267	1498	no	1	0	1542	MVAAKARCTIHSFLLQCCHHLLRHQWLGLCLCLCQTQSLQLHLQKEELPLPHHQPTQHLAPPPQTDLSVLDHGIQAL
LOC100498088	XM_002931611	1337	PREDICTED: Xenopus (Silurana) tropicalis nuclear factor 1 A-type-like (LOC100498088), mRNA	2	37	175	no	1	0	1542	MSSIPSLKHFFLTYVHLLTRGSTCKPEKENTLKNMKSACQKKRKEQ
LOC100498088	XM_002931611	1338	PREDICTED: Xenopus (Silurana) tropicalis nuclear factor 1 A-type-like (LOC100498088), mRNA	2	856	976	no	1	0	1542	MRWTVLVKSHFIQAKDVPREVEVSQVDGMMWSQECHRLLH
dock6	XM_002931590	1350	PREDICTED: Xenopus (Silurana) tropicalis dedicator of cytokinesis 6 (dock6), mRNA	1	2586	2736	yes	3	74	6395	MAETICLPPTFIMFSGCQTLIPILLHQDLVDWEDPCTMPQWHGQQIDQQV
LOC100498561	XM_002931613	1389	PREDICTED: Xenopus (Silurana) tropicalis tyrosine-protein kinase transmembrane receptor ROR1-like (LOC100498561), mRNA	3	1130	1271	no	2	58	2725	MQSVTLNSMGAILTAGTLGIREKPPGASPWMKMSSTSSVIFQPAKHF
LOC100498561	XM_002931613	1390	PREDICTED: Xenopus (Silurana) tropicalis tyrosine-protein kinase transmembrane receptor ROR1-like (LOC100498561), mRNA	3	365	608	no	2	58	2725	MMLQLFRSQEEFHSVQPTMDLGYGLETLTQRTLGISSVWQQTAGRLCLQLGCCLSNLVHPLQQVQGQLMMRKMDTASRIEG
cachd1	XM_002931614	1395	PREDICTED: Xenopus (Silurana) tropicalis VWFA and cache domain-containing protein 1-like (LOC100485053), mRNA	2	3163	3304	no	1	0	3645	MLIVTRSTEGAISICHHLQPKKCLYECPTWKMTEMNGMKTAMRIGES
slc25a3	NM_203597	1446	Xenopus (Silurana) tropicalis solute carrier family 25 (mitochondrial carrier; phosphate carrier), member 3 (slc25a3), nuclear gene encoding mitochondrial protein, mRNA	2	391	676	no	1	84	1164	MAFPLPLKKMVFVALQRDGLQRSLDIQCRACASLVSMKCSRYCMLICWARKIPTCGVLLFTWLRLPVLSSLLILLWLQWKLQKYAFRHNQAMLIL
otog	XM_002931630	1458	PREDICTED: Xenopus (Silurana) tropicalis otogelin-like (LOC100491199), mRNA	2	250	691	no	1	0	9009	MNLPLELDLVDFLLKLLYHKKVLAPRLASMEHIAQMLVYVTVKPFRHRGTGASLYLTLAKRGKESVKPGDSIILKHLMESIFTTLETVHTFLPETAARMCLCTLSGSTTALSVEVQCIHVPAQSACSSQAMTRSLFPVMKSEKEEFD
otog	XM_002931630	1460	PREDICTED: Xenopus (Silurana) tropicalis otogelin-like (LOC100491199), mRNA	2	3805	4147	no	1	0	9009	MKMTPFGWNNGRTIHFFGEKQHFSTIKAFGFQALVPLNCTARKDFLLCSLIWKLKFPNMIIQKNSNFRAALKLKRSLQLFHTGECVNGDMNHAPTLVSKPAAIQMPQHVHFSLR
otog	XM_002931630	1462	PREDICTED: Xenopus (Silurana) tropicalis otogelin-like (LOC100491199), mRNA	3	2675	2825	no	1	0	9009	MYMERQRISVRRSDLYTLLYMCLQKGALQLYQLPLPISLYCVWGPALLHI
slc6a15	XM_002931622	1500	PREDICTED: Xenopus (Silurana) tropicalis solute carrier family 6 (neutral amino acid transporter), member 15 (slc6a15), mRNA	3	455	674	yes	1	267	2457	MEQQTAVHTCTGWIFSWLGKCLEVSLFMPEEWWRCLLSAIFNPSSANWNSSLFPGAVGGTENKAGKYWSLELH
LOC100489661	XM_002931623	1506	PREDICTED: Xenopus (Silurana) tropicalis ALX homeobox protein 1-like (LOC100489661), mRNA	3	662	791	yes	2	85	1063	MGRYSKLRVISLLRTIYLCYQGQTVIHRFRTTCGQEIQVEDQL
trio	NM_001129921	1514	Xenopus (Silurana) tropicalis triple functional domain (PTPRF interacting) (trio), mRNA	3	1676	1805	no	2	175	9319	MQYMKSCTTSVSWKTSGNIAKFVCINAYSSVFFSKMFSRSWIG
trio	NM_001129921	1516	Xenopus (Silurana) tropicalis triple functional domain (PTPRF interacting) (trio), mRNA	3	1889	2039	no	2	175	9319	MKTLKKSLRIHTPMLISCWKLQNSWPRQESAIQRKYTRLLISLRIGFRIL
trio	NM_001129921	1517	Xenopus (Silurana) tropicalis triple functional domain (PTPRF interacting) (trio), mRNA	3	7730	7889	no	2	175	9319	MRSMSTRERLYKFWQVTNRTCFWCSELPLMSALQLRAGFQAMFWVTQVQSSLI
trio	NM_001129921	1520	Xenopus (Silurana) tropicalis triple functional domain (PTPRF interacting) (trio), mRNA	3	4142	4343	no	2	175	9319	MSSYLKMLDIVLSHGLTNFRCMCPTVRISLIQHNLSWNKQEHILMKFSSAMSWSTPSLLILSNLCKG
cldnd1	NM_001016259	1549	Xenopus (Silurana) tropicalis claudin domain containing 1 (cldnd1), mRNA	2	907	1057	no	3	272	1028	MVFLLSLCLLTPTGYGWSSVSLGISCKPSRVLSNEGLSCCMKVVVFMKTV
LOC100494037	XM_002931640	1561	PREDICTED: Xenopus (Silurana) tropicalis gamma-aminobutyric acid receptor subunit gamma-3-like (LOC100494037), mRNA	3	563	758	no	2	61	1141	MQNVNFSCTTFQWMNTHVHSSSPAMVIQGKKWYTDGEKIQWKLQIKNLGDFISLTSWASGIPLKS
gabrb3	NM_001102694	1565	Xenopus (Silurana) tropicalis gamma-aminobutyric acid (GABA) A receptor, beta 3 (gabrb3), mRNA	1	1587	1731	no	3	422	1847	MQEIQPHPLITQESSTENRVQLEIVLGGELQTEIILQRKPICGGGLPS
ube3a	NM_001001213	1583	Xenopus (Silurana) tropicalis ubiquitin protein ligase E3A (human papilloma virus E6-associated protein, Angelman syndrome) (ube3a), mRNA	2	400	553	no	1	333	2901	MKPARMNFVLPVPLFFVWITMQQPLRPSSYIRLMQNSVILIPPRKEQAHLI
lphn2	XM_002931671	1594	PREDICTED: Xenopus (Silurana) tropicalis latrophilin-2-like (LOC100494313), mRNA	2	229	460	no	1	0	4392	MTRSVMLIPFRWKIQTVIFQMHIKLCHRDVTIGRNVLLSQGQMFSRTHVLGRTSTWRFNMNVCHTKWSKKSLCVRGY
lphn2	XM_002931671	1596	PREDICTED: Xenopus (Silurana) tropicalis latrophilin-2-like (LOC100494313), mRNA	2	3214	3346	no	1	0	4392	MLSRECLFLYFTVPFKRKSVKNTANVSGTHTAVVVFQQKAPIVQ
ttll7	NM_001142660	1599	Xenopus (Silurana) tropicalis tubulin tyrosine ligase-like family, member 7 (ttll7), mRNA	1	1071	1200	no	3	296	2390	MKTLNVMKQRTEAASAPSNGLQNSYEPMIMTSANFGTIFLTWL
prkacb	NM_001171196	1613	Xenopus (Silurana) tropicalis protein kinase, cAMP-dependent, catalytic, beta (prkacb), mRNA	2	1045	1165	no	1	357	1410	MKWLLGIHHSLLISLFRSMKKLFQERYGFLPTSAQTLKTC
LOC100485363	XM_002931699	1648	PREDICTED: Xenopus (Silurana) tropicalis afadin- and alpha-actinin-binding protein-like (LOC100485363), mRNA	1	1413	1599	no	3	197	1871	MMTPQHFCRTAIYWKTKSVSRKNGSFLMSRKKTLRKKEGISQKLLSALGMRKRPLKKTEQLG
ddah1	NM_001127052	1676	Xenopus (Silurana) tropicalis dimethylarginine dimethylaminohydrolase 1 (ddah1), mRNA	2	454	595	no	1	78	930	MGEMFCLQEENSLWVCLKGPINVVLKFWQIPLRIMPFPLCQCVRHCT
cyr61	NM_001105514	1691	Xenopus (Silurana) tropicalis cysteine-rich, angiogenic inducer, 61 (cyr61), mRNA	3	959	1157	no	1	162	1287	MWPAKLYKFKEGKEMHQDKKISSSSEIHLCRMFQCKEISSKILWILCGWKVLHSTTDKDCQDPIPL
col24a1	NM_001079401	1694	Xenopus (Silurana) tropicalis collagen, type XXIV, alpha 1 (col24a1), mRNA	1	411	678	no	2	421	2476	MQTNAFRSPKDKEWKHLSHSKNDKTSVLHCNMRNSSHFRKTRTRYRHSAQIRPWKQRFNFFSNNTTIISFRTSRLELNRICYFHQKYTY
col24a1	NM_001079401	1695	Xenopus (Silurana) tropicalis collagen, type XXIV, alpha 1 (col24a1), mRNA	1	3072	3357	no	2	421	2476	MVQQENKALKELRVNLVNLEKKAYLDILGKQVILEKEANKEKRVLQAPREVWETRDHLESQDKRDHKVKLDHLGKQALRVLLDLREKLVHKENLV
LOC100495401	XM_002931677	1711	PREDICTED: Xenopus (Silurana) tropicalis hypothetical protein LOC100495401 (LOC100495401), mRNA	1	3711	4050	no	3	170	4292	MKKFTKIESRISAWIVGELFMGENCLLCIKDHIRKRNPFLVLNVENGLLIMRLLQYTHEYTQERNHFAAVHVASVLASTQHLFLIREYIQAKSRIHAIIVGEGSLTVLHMLLM
ldhd	XM_002931678	1715	PREDICTED: Xenopus (Silurana) tropicalis probable D-lactate dehydrogenase, mitochondrial-like (LOC100495564), mRNA	2	172	334	yes	1	0	1464	MEGMNQCTVADLLMWLFGPRVLIRLARWLKCVTVIMCQSFHLELEQDWREESAL
usb1	NM_001127143	1742	Xenopus (Silurana) tropicalis chromosome 16 open reading frame 57 (c16orf57), mRNA	1	180	324	no	3	56	806	MMRDLMTGQNMEEEFAASHMSEATGPPMSIYLFSHKMSFWIWWMNFCL
LOC100491476	XM_002931656	1806	PREDICTED: Xenopus (Silurana) tropicalis zinc finger protein 319-like (LOC100491476), mRNA	1	1296	1689	no	3	710	2420	MTNPFVALCAKNLLSICLSCLGMSGCTQERNHTSAHCVTKVLASPHILYTTREHTAQRGPTSVQFVIKVSNTDHICCATCMLMQASNCFSVRLASYVSKNLHSYSSTHAHQQERDLFAAVLARKPSAGHLT
ndrg3	NM_001006703	1812	Xenopus (Silurana) tropicalis NDRG family member 3 (ndrg3), mRNA	2	583	706	no	1	231	1446	MWMPRGSRWGHHSSLRGTNIPQWNNWQPCYPVSCSTLDFKV
ndrg3	NM_001006703	1813	Xenopus (Silurana) tropicalis NDRG family member 3 (ndrg3), mRNA	3	578	794	no	1	231	1446	MPCGCPGAAGGGITVPSGVPISHNGTTGSHATQCHAALWISKYNWHWCWSRSLCPCKICSDFPRVSGRHGSG
gins3	NM_001016123	1818	Xenopus (Silurana) tropicalis GINS complex subunit 3 (Psf3 homolog) (gins3), mRNA	3	293	476	no	2	4	634	MPMSWTCTRWDLIIMALAPNFSTLTVQKTQKLQRQYCRHLLDVSVALWTPLKMLIMKIPQG
mmp15	NM_001015921	1828	Xenopus (Silurana) tropicalis matrix metallopeptidase 15 (membrane-inserted) (mmp15), mRNA	1	1596	1764	no	3	266	2210	MTELIQPYFGNLQDTHTSSEETNTGDLMRNPVLQMLVTQNPLQSGLVSLTPPKGPS
mmp15	NM_001015921	1829	Xenopus (Silurana) tropicalis matrix metallopeptidase 15 (membrane-inserted) (mmp15), mRNA	1	1113	1464	no	3	266	2210	MTDEEYNSCMDLQWIKFPVPSLPYQPQANLKCLTKDPLNHLLEVNQNGLVMHLLLAVPPILTNTDPTFVRATLMLSVFFEERCLCLRVPGFGGYDTTESWITTPCQLVTSGVGFHLT
LOC100496513	XM_002931684	1850	PREDICTED: Xenopus (Silurana) tropicalis calretinin-like (LOC100496513), mRNA	1	258	429	no	3	38	854	MTRMQMAVLKWLSWPRFSPLKRTSCCVLDNTLDPALNSWRPGESMILTEVVISKPTS
mtss1l	XM_002931687	1878	PREDICTED: Xenopus (Silurana) tropicalis MTSS1-like protein-like (LOC100496985), mRNA	2	1129	1477	no	1	177	2391	MILDAVHMKPVIRSHHRQCHLTSLARSLLVLHLQKLQRLASQLVSVAHPPPIGPALALMKHHLLLPFSAGRTELNICGRQNLAQGTRAWRILTDPACLLPLLLLSMEKKCPLQPVT
siah1	NM_001015836	1955	Xenopus (Silurana) tropicalis seven in absentia homolog 1 (siah1), mRNA	3	377	599	no	2	280	1126	MTWPASLNAQCVLTMFYHLFFNVKVAIWSAVIVDQNSPAAQPAEALWDQFATWLWKKLPTLCCSLANMPPLVVR
LOC100493974	XM_002931669	1965	PREDICTED: Xenopus (Silurana) tropicalis phosphorylase b kinase regulatory subunit beta-like (LOC100493974), mRNA	2	1345	1495	yes	1	651	3936	MAAQNYIPVLLVWLKLPLKPLMDSTFLETRAALGLSSLWILMLITGTGKL
LOC100494152	XM_002931670	1988	PREDICTED: Xenopus (Silurana) tropicalis alanine aminotransferase 2-like (LOC100494152), mRNA	2	1258	1429	no	1	318	1932	MRSIRIIYTPKVASFTLSRKSCMIWGQNISTMWSLPLSTQPQKDIWESVATEEAIWR
xbp1	NM_001001199	2013	Xenopus (Silurana) tropicalis X-box binding protein 1 (xbp1), mRNA	1	570	1296	no	2	85	841	MCPSAAGAGPDVSEPDSVYMDPDSPDTSDSESDLLLGLLESLDSDLLLAYEEAFTGSPDEEINGEESDSISSSPSSPVGTPSAKLEAINELIRFDHVYTKPLSTEENSELGVETSIVVKMEEASFSPTCNEDLTCVKQEPQEDDLVPVLGMQSFLPCSENNLEKSSNILDTGSDSGYEGCSSPFSDLSSPLNSDRVWEDSFSTELFPQLLLSTHMDQSICPSSPVDAVSFWSHSSEFDDVHF
lztr1	NM_001128036	2039	Xenopus (Silurana) tropicalis leucine-zipper-like transcription regulator 1 (lztr1), mRNA	1	972	1341	no	3	425	2759	MICGPLGYRTGISPVGRRLSKVEKSHHLAATFPLLCAETKCLSFLGRVGPRSQITCSSLNSQKKYGHAFQLSICYVGHHHPPRDVMDTLWWLLTVIFMCLEVQQTIPCLMSCIVMMWTLSRGR
chsy3	XM_002931723	2057	PREDICTED: Xenopus (Silurana) tropicalis chondroitin sulfate synthase 3-like (LOC100494038), mRNA	3	1124	1277	no	2	247	2752	MRTWKLADVSGDLVELSVSGHMRCSSYSTKIMNTTEKDIYKTFTTARFMQR
fbn2	XM_002931725	2069	PREDICTED: Xenopus (Silurana) tropicalis fibrillin-2-like (LOC100494368), mRNA	2	7885	8062	no	1	0	8775	MLMSVVGITDVNMVVRISLVDTGAAVPKAISSITSGINVLMKMNVLLKTHAVQLPASTH
fbn2	XM_002931725	2070	PREDICTED: Xenopus (Silurana) tropicalis fibrillin-2-like (LOC100494368), mRNA	2	7429	7873	yes	1	0	8775	MANVSTTLALIGVSATLATQLTLGAQHVLISMNARSLPSPVTSSARIQKAATSVPVHVVISCKRMEKAVKIWMNVKPNSITASSSVSTPLEVSLVNVPRVLHNITLLASTTMNVAHNLTCVDLKGSVRIHLAVLLVNAKEDIHWIRLE
fbn2	XM_002931725	2071	PREDICTED: Xenopus (Silurana) tropicalis fibrillin-2-like (LOC100494368), mRNA	2	3235	3664	no	1	0	8775	MKMNVFTQFLASFGWMPAVALLELPGVQNARNVRNLGLKNLNFCVQEDQALLTEEMFCLGDLSIKILMNARRSLESVLMENVETQLEVLNVNATMALLWIWRKEIVQILMNAASPLTCVGVALALIPQEALNVSASKALRVVS
fbn2	XM_002931725	2072	PREDICTED: Xenopus (Silurana) tropicalis fibrillin-2-like (LOC100494368), mRNA	2	4690	4954	no	1	0	8775	MNALSRIYVCLEPAATFQECFVVSAMRVMNWTGLEETVQMSMSVLIQLIVLMAFVLTLLGDTNVTVHQIFSSTLQEWVVLIQELAIAT
fbn2	XM_002931725	2073	PREDICTED: Xenopus (Silurana) tropicalis fibrillin-2-like (LOC100494368), mRNA	2	5704	6088	no	1	0	8775	MVPVLTAMNAWKFQMFVVMVHVWTPKGAIIVYVTMDLKFLLIRQCAWILMSVSGSHVVMGLVKTQLAHITVCATQALKSLTITTAWILTSAAHCMGRCAGTGIVSMRSAPSYVCVMKVMNLLQMARTA
fbn2	XM_002931725	2074	PREDICTED: Xenopus (Silurana) tropicalis fibrillin-2-like (LOC100494368), mRNA	2	451	727	no	1	0	8775	MPGKEPSVQRVGSAGEASKMLCAGLMYVVLASTPTVALDGKHFLEETSALFQFVEIAVVMDSVPAQTCALALLDKYLQTVVQKQYSSAVSDA
fbn2	XM_002931725	2075	PREDICTED: Xenopus (Silurana) tropicalis fibrillin-2-like (LOC100494368), mRNA	2	7039	7408	no	1	0	8775	MEKAVWMKMNAALSLASVKMADVSIPLEATDVIAMKDFSQLHLEPSVLILARDFAFLKCYKPCVRCHQAAETMSLSLSVAVMEEEAGATSVRSAHFQALRSTKKCAHMAQDIQPMEKILMNAK
fbn2	XM_002931725	2078	PREDICTED: Xenopus (Silurana) tropicalis fibrillin-2-like (LOC100494368), mRNA	2	1816	1987	no	1	0	8775	MLMNAHQIHVLTETVLTRLDHIIANAIQVFKGLQQNKLALILMNVSRMEFFANMADV
fbn2	XM_002931725	2079	PREDICTED: Xenopus (Silurana) tropicalis fibrillin-2-like (LOC100494368), mRNA	2	2416	2638	yes	1	0	8775	MDLGNLAILAHPGIPLNFKAYAVEESVLLLMDEISMSVLWTLISVPMGFVKTCVGVSVVTAIVALNQILQAKIV
fbn2	XM_002931725	2080	PREDICTED: Xenopus (Silurana) tropicalis fibrillin-2-like (LOC100494368), mRNA	2	2221	2380	no	1	0	8775	MVTVSTLKVRSVAIALQDWPLEWMAVFVWTHTCVVHAMGESKKASVYVLFLEL
fbn2	XM_002931725	2081	PREDICTED: Xenopus (Silurana) tropicalis fibrillin-2-like (LOC100494368), mRNA	2	730	961	no	1	0	8775	MGELVLRIIVSAKKAMLEHTVDNLSVKMAARMGGDVLGQTDAPVFTDLLDLSAKETTEQGPVLHKLAIRCARVKSLV
fbn2	XM_002931725	2084	PREDICTED: Xenopus (Silurana) tropicalis fibrillin-2-like (LOC100494368), mRNA	2	6217	6571	no	1	0	8775	MNVLKNPISAFLELVPTPLGVFSVSVHQDLFCQKMAEGALTHVRVFVSPDLKMENVLYLKHITALKQNAAAAKCQEKAGAIHVNCVQRREKWHSKIYVRMDMEPSQALEIREKMSMSA
megf10	NM_001079258	2130	Xenopus (Silurana) tropicalis multiple EGF-like-domains 10 (megf10), mRNA	3	1820	2105	no	2	187	3529	MQMAVTLLLDIVAVWQGGQECTVTVCVLEDTGDQTVLYLVTVKMVPRVHQMMGSVNVLLDTEERHVREFVLQDFMGIGAVKLVLSVSTAMVLVIM
megf10	NM_001079258	2132	Xenopus (Silurana) tropicalis multiple EGF-like-domains 10 (megf10), mRNA	3	1001	1136	yes	2	187	3529	MGETVHRSANATMEAHVTLLQVNVIAVLDTMESDARKSVRLAYME
megf10	NM_001079258	2133	Xenopus (Silurana) tropicalis multiple EGF-like-domains 10 (megf10), mRNA	3	2273	2426	no	2	187	3529	MTVPRLVLLGIGAQTVSTPVTAIMELTAVHTMGSASVLLAGQGCTARRGVL
megf10	NM_001079258	2134	Xenopus (Silurana) tropicalis multiple EGF-like-domains 10 (megf10), mRNA	3	479	800	no	2	187	3529	MKAERCVFLTVLINVSMVAALLPTPVSVSQGGEGPTAPVLVMLTTGGHIAAAVASVKMELYATLLLEPVTVLLATRAGDARNAATKELMAMIANKSASAKMELPATM
aldh7a1	NM_001016377	2144	Xenopus (Silurana) tropicalis aldehyde dehydrogenase 7 family, member A1 (aldh7a1), mRNA	1	267	396	yes	2	58	1591	MEDLGRYPSTKAWGNCETNWGCAEEKDKTTWTLGILRDGKDIS
csnk1g3	NM_001139469	2167	Xenopus (Silurana) tropicalis casein kinase 1, gamma 3 (csnk1g3), mRNA	2	1819	1963	no	1	633	1881	MKQSAVAFSKEGKGKLFNATNDSGNVQTMGNYLLVHLLSSKRKKSSQQ
csnk1g3	NM_001139469	2168	Xenopus (Silurana) tropicalis casein kinase 1, gamma 3 (csnk1g3), mRNA	2	1597	1726	no	1	633	1881	MNMTGLENSCLHLLDLFMQTLHFHQTEKHTNTEIKCSKPKIRL
csnk1g3	NM_001139469	2169	Xenopus (Silurana) tropicalis casein kinase 1, gamma 3 (csnk1g3), mRNA	2	4156	4321	no	1	633	1881	MTLHGSTDWSKIGNAGMFRLSQQCSAFLSFFPSILMKSTLPECLNNKIHPCLKSM
csnk1g3	NM_001139469	2173	Xenopus (Silurana) tropicalis casein kinase 1, gamma 3 (csnk1g3), mRNA	3	1880	2018	no	1	633	1881	MTLETYRPWGITYLFICCLVKEKNHLSNDHVFLFYPFTENYHVPML
sncaip	NM_001005712	2190	Xenopus (Silurana) tropicalis synuclein, alpha interacting protein (sncaip), mRNA	3	509	806	no	2	235	2929	MKVMTKKKKKRKTKRMVIQISPAPQRTFLLMMGAIKLRVLKQVFCLVKLNIMTWTWMRFWTCLTSNPANSSVYLLRLQLRKGLQIYTHWSKEKLGLLET
tnfaip8	NM_001017184	2220	Xenopus (Silurana) tropicalis tumor necrosis factor, alpha-induced protein 8 (tnfaip8), mRNA	3	524	782	no	2	154	721	MSAGSCSIRSYSAISRQSLTDVLITCLTTFQIVNFWLLCTIPLDLSNSTFRDSVKESTKCWTRTIFKILLTFKGNGVTGTAATGSC
LOC100495617	XM_002931733	2224	PREDICTED: Xenopus (Silurana) tropicalis zinc finger protein 624-like (LOC100495617), mRNA	3	842	1166	no	1	0	1251	MWKALQPKCRPYGALQNPHRGEALHMCRVWQQLHPQLRPSHSPKDSLGHQTLLLHRVRQVLQPEVPDHPTPENPHRGAAILLRRVHEELHPQLGTQEAPPSAHWREAL
sema6a	XM_002931717	2226	PREDICTED: Xenopus (Silurana) tropicalis semaphorin-6A-like (LOC100493034), mRNA	2	682	841	yes	1	0	3075	MVTLSTSSIVKLQSNTTAWERWFSQESPRCAKMTWGDLRGCSKNSGHHSLKLD
sema6a	XM_002931717	2227	PREDICTED: Xenopus (Silurana) tropicalis semaphorin-6A-like (LOC100493034), mRNA	2	916	1132	no	1	0	3075	MAEMLSWLLFRHHTTASPARLFVPMIWLTLQAYSLGDSRSRSPQIQHGPQYQMNECRSRGQAAVLGLQQWKE
commd10	NM_001045623	2238	Xenopus (Silurana) tropicalis COMM domain containing 10 (commd10), mRNA	2	679	973	no	1	147	744	MRSCWSSITSLRLSRHSWIPLRDVLKMGSSTALLPPHYFALKIDCRAMFAEGINGLLPRKLYGLSPLRLATLGREDHLKNAKGIIVFPAEFCQCKVLV
tmed7	NM_203930	2248	Xenopus (Silurana) tropicalis transmembrane emp24 protein transport domain containing 7 (tmed7), mRNA	1	396	591	no	3	134	791	MIVLPLPQPAMGPTSSASVMNSPHSHTRQSTLISRLEMTHPYFQMRTVLLLLLRWNLPVFPSMRH
LOC100493200	XM_002931718	2250	PREDICTED: Xenopus (Silurana) tropicalis protein fem-1 homolog C-like (LOC100493200), mRNA	1	1350	1506	no	2	283	2134	MHQFVEVCLGHAAKQLGPFKSNDCKQFVVLRGAFFLHASGPGKRPVRNYSYI
snap25	NM_001016501	2271	Xenopus (Silurana) tropicalis synaptosomal-associated protein, 25kDa (snap25), mRNA	2	532	817	no	1	117	735	MMLEKQKWMRTLSKSVALLEIFVIWHLIWAMRLTHKIARLTGSWRRLIPTKPGLMRPISMPQRCWAVVRSSGGAPVSRYCPTRQYIHAFTMVFTY
snap25	NM_001016501	2272	Xenopus (Silurana) tropicalis synaptosomal-associated protein, 25kDa (snap25), mRNA	2	142	328	no	1	117	735	MSWRRCRGVQTSWPMSHWRVPAVCCSMLKGVKMLVSGLWLCWMSKENNWNASRREWNKSIRT
mkks	XM_002931737	2275	PREDICTED: Xenopus (Silurana) tropicalis McKusick-Kaufman syndrome (mkks), mRNA	1	384	537	no	3	743	2459	MIKKQTWLRKNWLWVAGISFLGIHFGTYFIQKLAKQSAKSNLQLKESKNSE
mkks	XM_002931737	2277	PREDICTED: Xenopus (Silurana) tropicalis McKusick-Kaufman syndrome (mkks), mRNA	3	125	317	yes	3	743	2459	MGLGNLWKNYKVLIVMGTGLGLVHWGWYNIKSNPIFQPEREDTLEPEPAITGYAVEKNTAKKAK
jag1	XM_002931738	2284	PREDICTED: Xenopus (Silurana) tropicalis protein jagged-1-like (LOC100486874), mRNA	2	1354	1474	no	1	0	3654	MIALASVKTAEPAGTWLMGFAVSVHPAMQGNAVRKMSMNV
jag1	XM_002931738	2285	PREDICTED: Xenopus (Silurana) tropicalis protein jagged-1-like (LOC100486874), mRNA	2	2005	2455	no	1	0	3654	MTAVKTLATMEGLVGTWLMISTANARMAGKEKPATPETVSAMKPRATTVGPAMMREIPLNVFALLDGKERHVILQGTAAVCQIPALTVELASSVGTLSLVFAKKAGKDQHAPRILMIAALTHAITVGHALMETTGTDVNVLLDLLVPTVG
jag1	XM_002931738	2286	PREDICTED: Xenopus (Silurana) tropicalis protein jagged-1-like (LOC100486874), mRNA	2	574	991	yes	1	0	3654	MVSAATNFVARGMTFSDTTRAIRMEIRPVWKAGWGLNVTKQYVVKAAAQNMVLARRQESADVNTDGKASTATNAFLTQDVSMGLAMNHGSACVKPTGVVSCATKILTTAVLTNHVSTEAPVATPALTNTNVPALKATLD
esf1	NM_001103068	2320	Xenopus (Silurana) tropicalis ESF1, nucleolar pre-rRNA processing protein, homolog (esf1), mRNA	3	2171	2327	no	2	34	2455	MLRIPGFRPCIRPTYTVLTLQIPVLRRPKPWAGCWRRKPAGERRSRKAGLRQ
LOC100489238	XM_002931752	2332	PREDICTED: Xenopus (Silurana) tropicalis zinc finger protein 160-like (LOC100489238), mRNA	3	872	1289	yes	2	121	2623	MGTSSSISAFTQRDRSLALIVGNVSPTEPSSESTAGLIWERDPSPTALGAIKSHQVRATFRGTKGRVLKGNHLPALSVGNHSNTNLICSYMNAHTPGRNLMFVPNVVKAFPRRCILKHIHLVILQRNLLAAQSVGNVSV
kif16b	XM_002931754	2342	PREDICTED: Xenopus (Silurana) tropicalis kinesin-like protein KIF16B-like (LOC100489716), mRNA	2	214	334	no	1	0	3966	MHHKKGFSKTLAQMSSNQHLKDTMPVSLPMDRQALESLTP
pcsk2	NM_001097191	2354	Xenopus (Silurana) tropicalis proprotein convertase subtilisin/kexin type 2 (pcsk2), mRNA	2	721	958	no	1	219	2136	MMELIICTQTLPQITMQRQAMTSAAMIPTHIPDIRMTGSTAMGHDVQEKCQLQPTTIYVASEWLITLKWQAFECWTSPS
wdr92	NM_001103046	2377	Xenopus (Silurana) tropicalis WD repeat domain 92 (wdr92), mRNA	1	432	690	yes	3	17	1091	MELLRFGTPGRRILQWPIWSLQLGKPSETAGQWHLAMPIMSRSGLCAPDMTTETLNSLTFVTCLSDGRPTLKMGSVAWSLTERILL
liph	NM_001011098	2417	Xenopus (Silurana) tropicalis lipase, member H (liph), mRNA	2	139	439	no	3	59	1439	MPYLYRSQYTQLHYWNGAESAITPLYEREPKVCPRFKCRQFYGLPVPECYKEDCFYYPWLQANRVPASMDRRYCKKVSRYPGFQCHRCGLEPRSYDCLVP
robo2	XM_002931767	2429	PREDICTED: Xenopus (Silurana) tropicalis roundabout homolog 2-like (LOC100493913), mRNA	1	3360	3639	yes	3	641	5087	MDQTISLILVVEMCCQQFQVKEKKQRLCFLMEPFIAALILLQNLAIIAQDKLHKPRHMLLRRYYIPTAFMSWQLTCLIHSGNLPFSRNLISLD
robo2	XM_002931767	2433	PREDICTED: Xenopus (Silurana) tropicalis roundabout homolog 2-like (LOC100493913), mRNA	1	3675	3801	yes	3	641	5087	MVEKTEKGRKIKTALKSLKTMDPVGPMFHFRPLPSNHCQALK
robo2	XM_002931767	2434	PREDICTED: Xenopus (Silurana) tropicalis roundabout homolog 2-like (LOC100493913), mRNA	1	2847	3012	yes	3	641	5087	MELSRTTGSGAWVMRHVSTSTRQWMLLFVPWLSVGYSLEFSTALKSQPVQAQALG
robo1	NM_001102701	2441	Xenopus (Silurana) tropicalis roundabout, axon guidance receptor, homolog 1 (robo1), mRNA	2	3412	3673	no	1	135	5088	MWMKNTGNPRANRNRMLPQCSTTSWSKTRSTKITELRTPFLPPFPTTSPMIRMPEGHTTAQTGEVAHLGAKVIRRVLVPRKYQSRLA
LOC100494084	XM_002931768	2446	PREDICTED: Xenopus (Silurana) tropicalis 1,4-alpha-glucan-branching enzyme-like (LOC100494084), mRNA	2	145	361	no	1	6	2055	MKEVWKSSPEVTNHLASIYLKMVAFVVKNGLLEQKPCSLLAILMVGTLFHIHIKKWIMGNGNYIFHPVKINL
LOC100495045	XM_002931773	2492	PREDICTED: Xenopus (Silurana) tropicalis ephrin type-A receptor 3-like (LOC100495045), mRNA	2	2320	2452	no	1	0	2952	MTQKLPILQGEEKFQLDGQHQKQFPTVNSHQQVTRGAMVSSSGR
LOC100495045	XM_002931773	2493	PREDICTED: Xenopus (Silurana) tropicalis ephrin type-A receptor 3-like (LOC100495045), mRNA	2	2461	2635	no	1	0	2952	MGRDPTGKCPTKMLSRPWKKAIGCHHQWTALRPYISLCWTAGRRTETTDPSLTKLLAF
irs4	NM_001141997	2538	Xenopus (Silurana) tropicalis insulin receptor substrate 4 (irs4), mRNA	1	390	807	no	3	203	3434	MMFGSGATCGSRSTATSATSCCGARATWVPPGWSTTTTRRSSGAASGAAATPRESSHSTSASPPAAGRMPRTSTWWLSIPRTSTSPWRRRASRSRTPGTRPSASSSMRARAPAWTPRSWRRITAPSGRALSSKRCGRSM
LOC100492984	XM_002931817	2548	PREDICTED: Xenopus (Silurana) tropicalis hypothetical protein LOC100492984 (LOC100492984), mRNA	1	4476	4701	no	3	167	5117	MPLAVLLEPPGSMMAIHYFMCKEMRGHTDKIWVPLAAASVASAQCLSCSATLITCVTLLQEMTTPTGCPRLSLCL
col4a6	XM_002931818	2560	PREDICTED: Xenopus (Silurana) tropicalis collagen alpha-6(IV) chain-like (LOC100493153), mRNA	2	1654	2149	yes	1	0	4929	MVTQDYLVLKELLALVVLVRRDTQVCLGQRGVVGKQDLQVLVTQVLLDLVGFLVTQDKQDYQDNQVWQGHQEQHYPVLLLENQAHQESVAHQDFQVVKVIWDSQEFQDNRALMVLKDNQAIQVLVEFQGLLDFLDPVEKKVLQGSMDCQVVKDFLESLGSQGPLV
col4a6	XM_002931818	2562	PREDICTED: Xenopus (Silurana) tropicalis collagen alpha-6(IV) chain-like (LOC100493153), mRNA	2	4327	4513	yes	1	0	4929	MAIACCSWKDKKRLTIKTWVLLVPVCPDSAPCLLFTATLMRSATMLAGMTNLTGSLPRPLSP
vbp1	NM_001127120	2583	Xenopus (Silurana) tropicalis von Hippel-Lindau binding protein 1 (vbp1), mRNA	2	397	559	no	1	24	600	MLCLSTILMKLRLYLKRIFQLLQETLILQKKTSTSLGTSSLLQKSIWLEFIIGM
smarca1	XM_002931820	2593	PREDICTED: Xenopus (Silurana) tropicalis SWI/SNF related, matrix associated, actin dependent regulator of chromatin, subfamily a, member 1 (smarca1), mRNA	2	2149	2311	no	1	0	3087	MQWMHISEMLCVSVNLECLRHHGHQSSPTFKIFSFSHQDCLSYWKRRFFITERQ
smarca1	XM_002931820	2597	PREDICTED: Xenopus (Silurana) tropicalis SWI/SNF related, matrix associated, actin dependent regulator of chromatin, subfamily a, member 1 (smarca1), mRNA	2	2347	2635	no	1	0	3087	MHLRYKKKSRERLMKQSLSVLKSLKRRKNFLHRASQIGTNETLTSLLKLMRSMAVMTLITLQERWKERHQKKLWIIQVCFGNAVMNFKTLRRLWLR
smarca1	XM_002931820	2598	PREDICTED: Xenopus (Silurana) tropicalis SWI/SNF related, matrix associated, actin dependent regulator of chromatin, subfamily a, member 1 (smarca1), mRNA	2	1654	1774	no	1	0	3087	MIQTGTHKWTYKQWIVLIELDRKRQYVYSVSSRIILWKKG
LOC100493796	XM_002931822	2609	PREDICTED: Xenopus (Silurana) tropicalis teneurin-1-like (LOC100493796), mRNA	2	1753	2122	no	1	0	8361	MIVLPTAMEMESVSLAIVTASQDSLGQTVREIPAPFFAVVMENMKKDTACVGTGGKVQSVMFLRSSVLTQPVLDTELALWECAFVFQDTKGRFVRKRIVLTPCVQAMECVYKESATVLLAGEE
LOC100493796	XM_002931822	2615	PREDICTED: Xenopus (Silurana) tropicalis teneurin-1-like (LOC100493796), mRNA	3	3569	3776	yes	1	0	8361	MVIQQASYFKSTKWNIAQRRWGKCIYIPAASSDLYTYGEWSAEEYLLLQLQWANQQQQTLCSRCTSNWT
thoc2	XM_002931823	2623	PREDICTED: Xenopus (Silurana) tropicalis THO complex 2 (thoc2), mRNA	3	2570	2747	no	2	169	5002	MNFTRLMMLLSSCPGLCMPITFHLNMMSLKRQRKETSSSTKYISISHRATWSCLLYMKQ
gria3	NM_001113023	2631	Xenopus (Silurana) tropicalis glutamate receptor, ionotrophic, AMPA 3 (gria3), mRNA	2	2077	2233	no	1	360	3021	MNGIWRTLMKLVTLRTLLILQMSLGYLTACGFPWVPLCSKDAISLQGPCQGG
LOC100494480	XM_002931826	2646	PREDICTED: Xenopus (Silurana) tropicalis uncharacterized protein KIAA2022-like (LOC100494480), mRNA	2	2233	2380	no	1	0	4290	MPIYLNAMLIMILKILLFYKPAALPTSQYHLLTLLPMYPFSLEAICRHC
LOC100487650	XM_002931788	2651	PREDICTED: Xenopus (Silurana) tropicalis ATP-binding cassette sub-family B member 7, mitochondrial-like (LOC100487650), mRNA	2	208	415	no	3	38	2273	MAGYKEGQFKAFFRCRKGALWMAINTNTDMLAWERRGQSSHRSQTRAKRSGFQENIKSHVFLCLAQRQT
usp46	NM_001008121	2683	Xenopus (Silurana) tropicalis MGC89462 protein (MGC89462), mRNA	3	173	398	no	2	430	1177	MNITSVWSILETPVTVTLFYKHFIFVVRFGRKFWRTRSSRGRRKACSRAWQTSSTVLPRKRRKWGSFLPRNLSPG
usp46	NM_001113166	2685	Xenopus (Silurana) tropicalis ubiquitin specific peptidase 46 (usp46), mRNA	3	107	332	no	2	4	1111	MNITSVWSILETPVTVTLFYKHFIFVVRFGRKFWRTRSSRGRRKACSRAWQTSSTVLPRKRRKWGSFLPRNLSPG
LOC100494793	XM_002931828	2691	PREDICTED: Xenopus (Silurana) tropicalis ligand of Numb protein X 2-like (LOC100494793), mRNA	1	477	678	no	3	389	2432	MYTTSSTRWMMNLSVTSVFSPCCNPWTLLVDTLTATDALRISYKKRTSALWTARSFAFRTATGLACW
LOC100488757	XM_002931794	2702	PREDICTED: Xenopus (Silurana) tropicalis cysteine-rich hydrophobic domain 1 protein-like (LOC100488757), mRNA	3	275	404	no	1	0	552	MLKEESSTQCEVAALWLYLLLLHFRLQSLACSMPKQKDKKIHL
cdx4	NM_204086	2705	Xenopus (Silurana) tropicalis caudal type homeobox 4 (cdx4), mRNA	1	534	699	no	3	134	914	MNGWGKPCNRLLQARREPKKNTGWCTLTIRGWSWKKNFITADISLSGGRQSWQQA
LOC100495403	XM_002931832	2728	PREDICTED: Xenopus (Silurana) tropicalis protein FAM123B-like (LOC100495403), mRNA	2	1411	1549	no	1	0	3243	MKGTMTPTHLVPKMIQEKALIIKNVFLETAIVEMHFMNSMSLRTAL
LOC100492309	XM_002931813	2860	PREDICTED: Xenopus (Silurana) tropicalis fibroblast growth factor 16-like (LOC100492309), mRNA	2	487	610	yes	1	0	606	MAPQEMDTGLNDTRSLQTSYQDRWILRKYQLCTETFITIGX
flnc	XM_002931838	2922	PREDICTED: Xenopus (Silurana) tropicalis filamin C, gamma, transcript variant 1 (flnc), mRNA	3	5105	5270	no	2	550	8779	MLIRRCHEAHSRSKCCQPMMPAKCAPVALVSTQQVFQPACLLSLPLMPVMQGKVC
flnc	XM_002931838	2924	PREDICTED: Xenopus (Silurana) tropicalis filamin C, gamma, transcript variant 1 (flnc), mRNA	3	998	1271	no	2	550	8779	MRMKKMQRSRLQSRDFWDGYKTKYHSFQSPISTVTGRMAKLWELLWTIVPQVCVQTGRPGIPTSLWRMQERPCNKQMIGWEYHRSLPQRRL
flnc	XM_002931839	2936	PREDICTED: Xenopus (Silurana) tropicalis filamin C, gamma, transcript variant 2 (flnc), mRNA	3	5105	5270	no	2	550	8683	MLIRRCHEAHSRSKCCQPMMPAKCAPVALVSTQQVFQPACLLSLPLMPVMQGKVC
flnc	XM_002931839	2938	PREDICTED: Xenopus (Silurana) tropicalis filamin C, gamma, transcript variant 2 (flnc), mRNA	3	998	1271	no	2	550	8683	MRMKKMQRSRLQSRDFWDGYKTKYHSFQSPISTVTGRMAKLWELLWTIVPQVCVQTGRPGIPTSLWRMQERPCNKQMIGWEYHRSLPQRRL
flnc	XM_002931840	2950	PREDICTED: Xenopus (Silurana) tropicalis filamin C, gamma, transcript variant 3 (flnc), mRNA	3	5105	5270	no	2	550	8359	MLIRRCHEAHSRSKCCQPMMPAKCAPVALVSTQQVFQPACLLSLPLMPVMQGKVC
flnc	XM_002931840	2952	PREDICTED: Xenopus (Silurana) tropicalis filamin C, gamma, transcript variant 3 (flnc), mRNA	3	998	1271	no	2	550	8359	MRMKKMQRSRLQSRDFWDGYKTKYHSFQSPISTVTGRMAKLWELLWTIVPQVCVQTGRPGIPTSLWRMQERPCNKQMIGWEYHRSLPQRRL
flnc	XM_002931842	2965	PREDICTED: Xenopus (Silurana) tropicalis filamin C, gamma, transcript variant 5 (flnc), mRNA	3	5105	5270	no	2	550	8386	MLIRRCHEAHSRSKCCQPMMPAKCAPVALVSTQQVFQPACLLSLPLMPVMQGKVC
flnc	XM_002931842	2968	PREDICTED: Xenopus (Silurana) tropicalis filamin C, gamma, transcript variant 5 (flnc), mRNA	3	998	1271	no	2	550	8386	MRMKKMQRSRLQSRDFWDGYKTKYHSFQSPISTVTGRMAKLWELLWTIVPQVCVQTGRPGIPTSLWRMQERPCNKQMIGWEYHRSLPQRRL
flnc	XM_002931841	2979	PREDICTED: Xenopus (Silurana) tropicalis filamin C, gamma, transcript variant 4 (flnc), mRNA	3	5105	5270	no	2	550	8335	MLIRRCHEAHSRSKCCQPMMPAKCAPVALVSTQQVFQPACLLSLPLMPVMQGKVC
flnc	XM_002931841	2982	PREDICTED: Xenopus (Silurana) tropicalis filamin C, gamma, transcript variant 4 (flnc), mRNA	3	998	1271	no	2	550	8335	MRMKKMQRSRLQSRDFWDGYKTKYHSFQSPISTVTGRMAKLWELLWTIVPQVCVQTGRPGIPTSLWRMQERPCNKQMIGWEYHRSLPQRRL
LOC100491644	XM_002931865	2993	PREDICTED: Xenopus (Silurana) tropicalis smoothened homolog (LOC100491644), mRNA	2	445	727	no	1	0	2316	MAARMKYRLSSSIALGSVRHLLSVLTTPRAGMRMWRGAASSVRTHCSLRRSIVKCMSTLPYSAQSPSSVPFLLWPPFCQTGRIPTVTQLSSCFM
klhdc10	NM_001016816	3020	Xenopus (Silurana) tropicalis kelch domain containing 10 (klhdc10), mRNA	3	302	527	no	2	55	1288	MMSLEGQKMKTTLYLENSGDIILLQACGIRWAQMVTCQGSWHLCHWFYMVTIFWCLEVLESHLAKAMVMMFTSAM
cpa1	NM_001114209	3031	Xenopus (Silurana) tropicalis carboxypeptidase A1 (pancreatic) (cpa1), mRNA	1	675	861	no	3	0	1262	MALFTLINRIVCGVKPDLQILAHSVLELTPTETGMQVLEVLALAQIPALKPTEDVLLILNLK
exoc4	XM_002931869	3048	PREDICTED: Xenopus (Silurana) tropicalis exocyst complex component 4 (exoc4), mRNA	2	508	679	no	1	0	3045	MKSRTSSKYHKNLNSVWLASITSALLTCWYPLLTHWKGPCFRWRGLAICDWSFIVRS
chchd3	NM_001004897	3053	Xenopus (Silurana) tropicalis coiled-coil-helix-coiled-coil-helix domain containing 3 (chchd3), mRNA	3	671	986	no	2	307	940	MNITKINWQGWKRGVPSFTRLPLSNTKKLLVKWRPDSSDMRLIQFVLTCRLKFSSATSRTHSSLLAAQHWPASTCIVSTVPNRACLGEEGRSPVCGEKASQPILI
tuba4	NM_213682	3074	Xenopus (Silurana) tropicalis tubulin, alpha 4 (tuba4), mRNA	3	155	347	yes	2	73	1423	MDFSQMALCRVKNLLRWWILPLGLSSVKLGQENMYPELFLLTWSKPLLMRSELVPIVHYSIRNN
rbm17	NM_001006731	3099	Xenopus (Silurana) tropicalis RNA binding motif protein 17 (rbm17), mRNA	1	525	942	no	3	101	1298	MKLVDSLADLTQNRMKTKIMNEKGEKEQWEEQPSHHRHPLWKRTGNLLCLLMMTSQGHDHQWQRLQFHHLCMMSQRDQDHQLGLAILSLQIWVVLWPTKSCRSMAFGKDRALASTSRVSALHFLLKRQARGEAKLLLVT
taf3	XM_002931856	3133	PREDICTED: Xenopus (Silurana) tropicalis TAF3 RNA polymerase II, TATA box binding protein (TBP)-associated factor, 140kDa, transcript variant 2 (taf3), mRNA	3	503	734	no	2	190	2980	MHFSSLLLEARMQKTEKNTSLITYLLSSLHRKMRKKKSRCPQMEEHQQKLCRFPLMKKEKKEKERWKMKRLSMMKII
taf3	XM_002931855	3141	PREDICTED: Xenopus (Silurana) tropicalis TAF3 RNA polymerase II, TATA box binding protein (TBP)-associated factor, 140kDa, transcript variant 1 (taf3), mRNA	3	503	731	no	2	190	2974	MHFSSLLLEARMQKTEKNTSLITYLLSSLHRKRKKKSRCPQMEEHQQKLCRFPLMKKEKKEKERWKMKRLSMMKII
celf2	NM_001102947	3148	Xenopus (Silurana) tropicalis CUGBP, Elav-like family member 2 (celf2), mRNA	2	1336	1600	no	1	201	1740	MVQLVQWMPSPRPTQEFSSTQRRHCLHYTVRVCYNNRVLRAARKKALKEQIYLFIIFLKSLETRTSYRCLCLLEMLSLLKYLLTNRPI
usp6nl	NM_001113872	3150	Xenopus (Silurana) tropicalis USP6 N-terminal like (usp6nl), mRNA	2	208	328	no	1	138	1098	MTEAEKEQRLILGKMLTFYFIKLLIDLDFYTKKNCQFMMR
LOC100495146	XM_002931902	3212	PREDICTED: Xenopus (Silurana) tropicalis fibrosin-1-like protein-like (LOC100495146), mRNA	2	1486	1864	no	1	0	3180	MHFCSKCPWIHTNWIFVESLIYSAGPLLQEYFQDSPTHMTWPGHFSLVQDQHTQQLPHSDHPRITAVSCPQATWRLTTAYLLTKRAPLFRISPVPMSHGTAFTGHLPRSQLLRRGPKLETRSAVLL
chfr	NM_204047	3220	Xenopus (Silurana) tropicalis checkpoint with forkhead and ring finger domains (chfr), mRNA	2	1057	1180	no	1	30	1908	MHGIRLHKICCSQRYVGRFLMKKGALRICWSFLMWIVNLLI
zdhhc8	NM_001044406	3255	Xenopus (Silurana) tropicalis zinc finger, DHHC-type containing 8 (zdhhc8), mRNA	3	239	395	yes	2	88	2416	MDSCSCSSWQTSAWPLLWIRVSSLELMKMKTRMMISELHSTRMWRSKEYKYG
dgcr8	NM_001159539	3269	Xenopus (Silurana) tropicalis DiGeorge syndrome critical region gene 8 (dgcr8), mRNA	2	721	859	no	1	0	2316	MRMNLITMWMLFWKSPFTPPKSEELMKNMILIVIINQMESQVCNPW
cdc45	XM_002931882	3319	PREDICTED: Xenopus (Silurana) tropicalis CDC45 cell division cycle 45 homolog (S. cerevisiae) (cdc45), mRNA	1	111	258	no	3	35	1742	MLMLSAPVRYFRHYFSVIMCSIPWSQSLAGRNLKHCFLNIKNSSVTLFS
ufd1l	NM_001006805	3323	Xenopus (Silurana) tropicalis ubiquitin fusion degradation 1 like (ufd1l), mRNA	3	578	761	no	2	16	937	MLILMPHLDTRSQRDIHSRKNQQKLNQTTVSMQQTLGSGHSLVLGTDWMERRRGLTPVPSH
pi4ka	XM_002931887	3371	PREDICTED: Xenopus (Silurana) tropicalis phosphatidylinositol 4-kinase, catalytic, alpha (pi4ka), mRNA	2	5626	5857	no	1	0	6183	MTILLGSMGMNQLLLSKRLDITLSEVWLPTASCCSCSRLKIDIMEISCWIKRGTLSTLILVSCLKAPQGATWDGSQI
LOC100492311	XM_002931888	3386	PREDICTED: Xenopus (Silurana) tropicalis clathrin heavy chain 1-like (LOC100492311), mRNA	1	4713	4914	no	3	107	5147	MPCCMLRNQRILTWLKICYSGFWKKGSRSVLPPLCLPVMTCCMQILCSNLPGDTILWILLCLISSRS
LOC100492311	XM_002931888	3387	PREDICTED: Xenopus (Silurana) tropicalis clathrin heavy chain 1-like (LOC100492311), mRNA	1	2805	2985	no	3	107	5147	MTAVLWASTVKKETLTLPVWHMREANVTLSSLRCAMKTPCSRVRPVTLYVEKMRNCGQMS
LOC100492311	XM_002931888	3388	PREDICTED: Xenopus (Silurana) tropicalis clathrin heavy chain 1-like (LOC100492311), mRNA	1	3690	3936	no	3	107	5147	MPTFSRWETAVMKKACMMLPSCSIIMFLTLLVWHLHWYILGNIRLLWIVQEKPIAPALGRRSVLLVSMEQSSAWLKCVACTL
dgcr2	NM_001016840	3419	Xenopus (Silurana) tropicalis DiGeorge syndrome critical region gene 2 (dgcr2), mRNA	3	1070	1220	yes	2	172	1825	MVSQKCVWLLFVKDHKAVSSIARTPRSAANLLALIPMEAAYLTLWPVVCV
smarcb1	NM_001006818	3427	Xenopus (Silurana) tropicalis SWI/SNF related, matrix associated, actin dependent regulator of chromatin, subfamily b, member 1 (smarcb1), mRNA	1	282	432	no	3	0	1136	MGMMRNIKQSLLAQNHQPTSGSKRQSEIASGFQLYPTAPTTWMQCLALLL
cabin1	NM_001097240	3443	Xenopus (Silurana) tropicalis calcineurin binding protein 1 (cabin1), mRNA	2	280	514	no	1	258	4449	MQHLLWKMNRRRLSKVIKHKLKRPRKLRHLHFTIRPWTFRSLTSSMSLHRPITSYWRPVFCRRQSHQVMKKKALNIQA
cabin1	NM_001097240	3451	Xenopus (Silurana) tropicalis calcineurin binding protein 1 (cabin1), mRNA	2	2986	3265	no	1	258	4449	MYVCCKRNWLPPPLKTPILTKKSWRLHWSSASTVSLATLARKAKLATLRSTLCSRWSCYGKMLLSCLNISDQKLFLNLTATKPALYQLTWLTC
cabin1	NM_001097240	3453	Xenopus (Silurana) tropicalis calcineurin binding protein 1 (cabin1), mRNA	3	5711	5831	no	1	258	4449	MILRVAKICCWRPTVCGSRAKKSQHMIWGRLKKSCVKPTC
LOC100497361	XM_002931912	3477	PREDICTED: Xenopus (Silurana) tropicalis mediator of RNA polymerase II transcription subunit 15-like (LOC100497361), mRNA	2	1621	1768	no	1	0	2022	MTWLCQHLPHQQSHLQNNSTCANHCWMLSWQTSARLFSTTLCTEPLCQL
smpd4	NM_001113156	3479	Xenopus (Silurana) tropicalis sphingomyelin phosphodiesterase 4, neutral membrane (neutral sphingomyelinase-3) (smpd4), mRNA	1	183	330	no	2	34	2422	MVNRDCFRQSGWKYTGLEPPWLTRAYQSTGISYCLGIFGSKWSDDEVGL
smpd4	NM_001113156	3483	Xenopus (Silurana) tropicalis sphingomyelin phosphodiesterase 4, neutral membrane (neutral sphingomyelinase-3) (smpd4), mRNA	3	776	929	no	2	34	2422	MQTLQHRKYGGQRPYCKYLWRYGFITTLLKCIKRCSHQMQRSYSSPQKSMF
bcr	NM_001130320	3506	Xenopus (Silurana) tropicalis breakpoint cluster region (bcr), mRNA	3	3056	3275	no	2	646	4132	MLLFTQQLDSSRAQISSAHSRWILLVTLLTRQKHVYIGTLQSPTGMRNLKLSWRAHRPCAFCVTRRAATGTGL
LOC100498135	XM_002931917	3515	PREDICTED: Xenopus (Silurana) tropicalis sodium/glucose cotransporter 1-like (LOC100498135), mRNA	3	824	1022	yes	1	0	1980	MARAHLWSDHSCSVVLLHRSGDRSAMSVSQEHFSCKSWLYFVWVSQTAAHVPHGISRNDQPYPIYR
LOC100498135	XM_002931917	3516	PREDICTED: Xenopus (Silurana) tropicalis sodium/glucose cotransporter 1-like (LOC100498135), mRNA	3	305	668	no	1	0	1980	MECSGYYSDPWLDLCANLCESWGGDNARIFKETFWWGPDSDLSVCALSSSLCLHQDLCRHVLRGSLYPAGHEDQYIHSHCHAACHHCPVHSHRGACGCHLHRHLTDHHHVSGILHPYGICI
LOC100493915	XM_002931895	3520	PREDICTED: Xenopus (Silurana) tropicalis sodium/glucose cotransporter 1-like (LOC100493915), mRNA	3	362	725	no	1	69	2037	MECSGYCGDPWLGLCANLCESWGGDNARIFKETFWWGPDPDLSVCALSSSLCLHQDLCRHVLRSNLYPAGHEDQYIHSHCHVACHHCPVHSHRGACGCHLHRHLTDHHHVSGILHPYGICI
LOC100493915	XM_002931895	3521	PREDICTED: Xenopus (Silurana) tropicalis sodium/glucose cotransporter 1-like (LOC100493915), mRNA	3	881	1079	yes	1	69	2037	MARAHLWSDHSCPVVLVHRSGDRSAMSVSEEHVSCKSWLYFVWVSQTAAHVPHGISRNDQPYPIYR
depdc5	XM_002931918	3528	PREDICTED: Xenopus (Silurana) tropicalis DEP domain-containing protein 5-like (LOC100498286), mRNA	2	1138	1303	yes	1	57	4779	MGLVWIWYVWESSRFMLFHFSSCTIVPVQEIHVLEMIITSLTGLTIASTHRRASL
depdc5	XM_002931918	3530	PREDICTED: Xenopus (Silurana) tropicalis DEP domain-containing protein 5-like (LOC100498286), mRNA	2	2659	2833	no	1	57	4779	MNLPKSATCTVCAHHTLSVILCPAGWNSPMSDWRIINGTIWISIYAQLALKISVSSNP
pisd	NM_001078974	3545	Xenopus (Silurana) tropicalis phosphatidylserine decarboxylase (pisd), mRNA	2	331	517	yes	3	0	1241	MAPYKQGCYLQISANAAALPCMGTPESGGTPNMAKETSIPIVHLDVWGEHERGCSGRSAPVP
drg1	NM_001016294	3560	Xenopus (Silurana) tropicalis developmentally regulated GTP binding protein 1 (drg1), mRNA	3	239	362	no	2	67	1168	MLLRQEMLELGLLGSHLLGNLHYSVTWLEFILKWLPMNLPP
patz1	XM_002931897	3567	PREDICTED: Xenopus (Silurana) tropicalis POZ-, AT hook-, and zinc finger-containing protein 1-like, transcript variant 2 (LOC100494086), mRNA	1	2124	2379	no	3	1049	2951	MFAHMMVQLGSHIFARVVERGSPGQTTLMGTLSRFIHQRDPTSVRHVMLHSPHVTGFAHTWLVTRTKCHVRCAANTCGLLIWLII
rnf185	NM_001004830	3579	Xenopus (Silurana) tropicalis ring finger protein 185 (rnf185), mRNA	2	127	649	yes	1	243	675	MASAGPAPSASAENSSPGGASGSTNGEASSQDSTFECNICLDTAKDAVISLCGHLFCGWKLDQTGRCVQSAKLESAVRKSYRCMEEEALGRKIPEKKPLHVLKGRDQNQKTGVFRVSDLVMGGSRCHLVLEHSLLEYLPQPLTSMMAALHQQFLGLHNMSMNSFSLVSSSLLPW
slitrk1	NM_001102925	3596	Xenopus (Silurana) tropicalis SLIT and NTRK-like family, member 1 (slitrk1), mRNA	3	2429	2603	no	2	472	2560	MPTPLLLKSIPSRQYVILHTGTMDPIIQMAPIEFMIVAPTLCQTRFARVGYGQSGERV
spry2	NM_001006931	3606	Xenopus (Silurana) tropicalis sprouty homolog 2 (spry2), mRNA	3	1073	1313	no	2	385	1327	MMTRIIVQTTHVLAVSPTAALDGLPLVSWPCSCLVCGVTFQPRVALNCARAVTTAQIDPDVAAKDQTQFALKFHTFSLGT
MGC69333	NM_213703	3612	Xenopus (Silurana) tropicalis hypothetical protein MGC69333 (MGC69333), mRNA	1	732	978	no	3	173	2051	MIGRGKIVFVKESMIGMYLGEICTETGITDGEVEVAVTAEAEVAAGVRRGSVIGKGIGVVAELEVETRILESQSLILIDQTQ
slain1	NM_001112938	3628	Xenopus (Silurana) tropicalis SLAIN motif family, member 1 (slain1), mRNA	1	858	1110	no	3	485	1787	MIPSLWDTNYKISQMFRSWLDYRKKALGKTLQLPLPAVQYHGLAPAFHCILGRNYHALVIRIQIAIVLKKMMKILIICHHLSLD
mycbp2	XM_002931934	3637	PREDICTED: Xenopus (Silurana) tropicalis MYC binding protein 2 (mycbp2), mRNA	2	7684	7888	no	1	0	13539	MMKARLGPWLEILVAINTFVMRMSKSFWIKVLKLHLQALSPFKCFTVAQVATLCQALIMALEITKVIS
mycbp2	XM_002931934	3639	PREDICTED: Xenopus (Silurana) tropicalis MYC binding protein 2 (mycbp2), mRNA	2	3754	4015	no	1	0	13539	MNLSFYKLAGGMLRGLECPVQAVTVAPMAKPQLQLMMVLFSSLKVLRNQIMVQMSMQGRYHNYYTDFLQVMVVQQKENHKPLSQCTF
mycbp2	XM_002931934	3641	PREDICTED: Xenopus (Silurana) tropicalis MYC binding protein 2 (mycbp2), mRNA	2	13120	13318	no	1	0	13539	MLIMCATNAKRHILVGKLGVMQKLGKEMTMIPENLFVELVQMCPGLRCAQNMVQISLNTNVVTAAP
mycbp2	XM_002931934	3654	PREDICTED: Xenopus (Silurana) tropicalis MYC binding protein 2 (mycbp2), mRNA	2	12496	12703	yes	1	0	13539	MDSKSKCQCVIIMMMVKLQRSFCAMLAGTCAQTVTASYISTDEQNHIRDRSMPRLHAVRLILVDILAVE
mycbp2	XM_002931934	3655	PREDICTED: Xenopus (Silurana) tropicalis MYC binding protein 2 (mycbp2), mRNA	2	2533	2653	no	1	0	13539	MRAENKGRKMQAKSQLTLLELCDLTVNCGLFKLAVAFTTR
mycbp2	XM_002931934	3656	PREDICTED: Xenopus (Silurana) tropicalis MYC binding protein 2 (mycbp2), mRNA	3	12074	12212	no	1	0	13539	MYCQGPDCPAKGQRNTNQRHCRNQCRKRCHHCHSANDLQLQLPQKR
fbxl3	NM_001016128	3659	Xenopus (Silurana) tropicalis F-box and leucine-rich repeat protein 3 (fbxl3), mRNA	2	388	535	no	1	273	1572	MTGETCFQILFYRYFSICLSWTAHMLLKYAVTGTMCFICQTCGDALNLN
dach1	NM_001078708	3712	Xenopus (Silurana) tropicalis dachshund homolog 1 (dach1), mRNA	3	1499	1667	no	2	13	2089	MRWDMRQKECTWKKMRPRSQHQLRETALTNFPCLGMGNIYLLATHLLFYFLMDCLP
pcdh9	XM_002931930	3715	PREDICTED: Xenopus (Silurana) tropicalis protocadherin-9-like (LOC100489504), mRNA	1	3564	3690	no	3	1046	4655	MPPGLRQPKGASKEQSGCHQTKRTSRIRKRKGRKGNLPRVPC
prkar1b	NM_001079454	3735	Xenopus (Silurana) tropicalis protein kinase, cAMP-dependent, regulatory, type I,beta (prkar1b), mRNA	1	465	618	no	3	65	1205	MYFLPILMTMREVIYSTPCSLSIILPERQSYSKVTRETISMSLIREKPMSM
trrap	XM_002931947	3779	PREDICTED: Xenopus (Silurana) tropicalis transformation/transcription domain-associated protein (trrap), mRNA	1	8343	8496	no	3	92	11570	MSSMGSLSRLKKRTRKPWRRPRKNMKGVTRLPLSFQNISCGKTTGFDVQKS
trrap	XM_002931947	3782	PREDICTED: Xenopus (Silurana) tropicalis transformation/transcription domain-associated protein (trrap), mRNA	1	9597	9723	no	3	92	11570	MMTRTRWQMQSISTVLASLLSSGWHGSHSCLHVSLARRASFS
tecpr1	NM_001113816	3819	Xenopus (Silurana) tropicalis tectonin beta-propeller repeat containing 1 (tecpr1), mRNA	3	3221	3344	no	2	76	3595	MKMETCGSAMELPLPTLKEQHGSICQIISVRCLWGPLTRFG
ccz1b	NM_001008197	3860	Xenopus (Silurana) tropicalis chromosome 7 open reading frame 28B (c7orf28b), mRNA	2	181	328	no	1	318	1458	MNKLEMSAYVKQSCSLPGPSIQQNLLNLCILRKTDSFFMSQKRAFGWSW
aldob	NM_203800	3874	Xenopus (Silurana) tropicalis aldolase B, fructose-bisphosphate (aldob), mRNA	3	536	692	no	2	43	1135	MRMLMFWLDMPVSASRMDLCQLWNQKSCLMGHMISKGVSTRLKRSCPLCMLP
pms2	XM_002931979	3908	PREDICTED: Xenopus (Silurana) tropicalis mismatch repair endonuclease PMS2-like (LOC100490402), mRNA	1	495	756	no	3	92	2636	MTTMGRLFRNPQCPDSKEQQSPYNSCSTRCRCDIKNFSETLKRSLPKWCKCFRPIVSFQLGFELLAQIKSARAKGTQWYVPAVAQAT
usp31	XM_002931991	4025	PREDICTED: Xenopus (Silurana) tropicalis ubiquitin carboxyl-terminal hydrolase 31-like (LOC100492761), mRNA	2	1975	2233	no	1	0	3660	MGCGIALMTVMFSPCLRMMCALRLLTSCSISDGQRSHHGQQTALLQVLPARPFVITGFLVSPGASSPVLLLRLRLGARLLHHWQNP
usp31	XM_002931991	4027	PREDICTED: Xenopus (Silurana) tropicalis ubiquitin carboxyl-terminal hydrolase 31-like (LOC100492761), mRNA	2	1504	1711	no	1	0	3660	MCQMLRVCGCSARYITSLSVALLPSAFICTPKRSSWLLVMPGAALTVSSFNRAALNSACGPCPMCLSCI
fn1	NM_001030524	4086	Xenopus (Silurana) tropicalis fibronectin 1 (fn1), mRNA	3	1535	1658	no	2	193	7618	MMPIKNLDSVPWQLMRKYALLMRESCIELVISGTSSMIKAT
fn1	NM_001030524	4088	Xenopus (Silurana) tropicalis fibronectin 1 (fn1), mRNA	3	422	542	yes	2	193	7618	MAEAEVSTAKANQSLKRPALTNTLVLLTGSVKHMSDQRIT
trpm8	NM_001161633	4133	Xenopus (Silurana) tropicalis transient receptor potential cation channel, subfamily M, member 8 (trpm8), mRNA	2	2101	2242	no	1	171	3594	MILMLLGSRKKLLMNMKQEPLNYSQNATVMMRTWQRCCWFIPARPGE
LOC100485248	XM_002931998	4143	PREDICTED: Xenopus (Silurana) tropicalis arf-GAP with GTPase, ANK repeat and PH domain-containing protein 1-like (LOC100485248), mRNA	2	370	526	no	1	0	2592	MKGDPPKHNLPCGWMQLSLSSAWKMRSAFRQSITTTAALPTTATPARSLWCW
LOC100485248	XM_002931998	4144	PREDICTED: Xenopus (Silurana) tropicalis arf-GAP with GTPase, ANK repeat and PH domain-containing protein 1-like (LOC100485248), mRNA	2	1576	1756	no	1	0	2592	MQTARSTAGRKVPVTLRLMGCQVLLKNKRRTLSLLSYPLQVRAGTLKLQAMRRGMHGYRP
LOC100489340	XM_002932025	4222	PREDICTED: Xenopus (Silurana) tropicalis histone deacetylase 4-like (LOC100489340), mRNA	2	2524	2674	no	1	0	3255	MFTMGMVLNRPFTVTRMSFIYHSIVMMMVTFFQAVGLQMRLAQALAWVSM
ndufa10	NM_001083348	4227	Xenopus (Silurana) tropicalis NADH dehydrogenase (ubiquinone) 1 alpha subcomplex, 10, 42kDa (ndufa10), nuclear gene encoding mitochondrial protein, mRNA	1	297	450	yes	3	11	1064	MEVSCHQSLVEIAAWTNFTMTQNVLMETHIVCSTGCIVCASCSILMHWNTF
lss	NM_001079570	4248	Xenopus (Silurana) tropicalis lanosterol synthase (2,3-oxidosqualene-lanosterol cyclase) (lss), mRNA	2	1888	2128	yes	1	174	2364	MVPGKGPGVCALHMVFGLVWRPLLAWDIHTRRVALKSFVPAISCSPTKWKMEDGGKILNPANRGDMFRAQALRYTTLAGP
LOC100490531	XM_002932032	4291	PREDICTED: Xenopus (Silurana) tropicalis poly(rC)-binding protein 3-like (LOC100490531), mRNA	2	853	985	no	1	0	1017	MKFDRCLGHKSKLPAPWKGQQSVRSPSLGAQLISALHSTSSTPG
pde1a	NM_001102974	4334	Xenopus (Silurana) tropicalis phosphodiesterase 1A, calmodulin-dependent (pde1a), mRNA	3	452	599	no	2	280	1894	MQRQCWKPCILMKPGDYWTRKMNFLISIRIQFHWKYETGWHLPLPGKWE
ube2e3	NM_203974	4350	Xenopus (Silurana) tropicalis ubiquitin-conjugating enzyme E2E 3 (UBC4/5 homolog) (ube2e3), mRNA	3	416	572	no	2	145	766	MNGDLRFLDLQDQYMRGVYFSWISHFHLIIPLSHQRSLFAPESITVILTARE
ube2e3	NM_203974	4352	Xenopus (Silurana) tropicalis ubiquitin-conjugating enzyme E2E 3 (UBC4/5 homolog) (ube2e3), mRNA	3	170	362	no	2	145	766	MMKALVPVVEVQMLTSETHQHQNLKSKKKENPRRSNKRKIPNCPVKPLLSCPLVLKGFRRSWLK
LOC100490867	XM_002932034	4354	PREDICTED: Xenopus (Silurana) tropicalis pre-mRNA-splicing factor CWC22 homolog (LOC100490867), mRNA	2	1150	1339	no	1	0	2283	MCSMFSRWIQIFSKMKRNTRPLKKKFLMKETVILKARMLMRAVKMTVKRRRRMAEKLEKKERK
rnf150	NM_001142081	4372	Xenopus (Silurana) tropicalis ring finger protein 150 (rnf150), mRNA	1	696	915	no	3	17	1298	MPMHETGTRGDLEMLLKKPSANCKSEPSRKVTRRQSQSLIIALFALKVTSLMMLSESYHADTFFISLVWIPGF
rnf150	NM_001142081	4376	Xenopus (Silurana) tropicalis ring finger protein 150 (rnf150), mRNA	2	40	199	no	3	17	1298	MPQPCSLHLAAVLLLRPFALPGFYRGREGGVVHSLRQHHLHRSTKPPVEDREE
tbc1d9	NM_001137618	4390	Xenopus (Silurana) tropicalis TBC1 domain family, member 9 (with GRAM domain) (tbc1d9), mRNA	3	1514	1694	no	2	661	4357	MPEQRVRDTGHCSAYQKMRSWMDTLIAHSGHHLVKGTFWGRCLFPQIIFASLVKKRTCAA
tbc1d9	NM_001137618	4394	Xenopus (Silurana) tropicalis TBC1 domain family, member 9 (with GRAM domain) (tbc1d9), mRNA	3	755	914	yes	2	661	4357	MGREEVGDWQGCLWERWMLSWILVQGLHLIASCIRHLTLWYIGPLRVEVAEGR
maml3	XM_002932046	4418	PREDICTED: Xenopus (Silurana) tropicalis mastermind-like 3 (maml3), mRNA	2	679	874	yes	1	0	3372	MENSKMGFVMGDSLHLLNGEGRSCLGWTLLTIFPTCHYLQSLLFTSSISSLIYRIVGSIQVAWKM
setd7	NM_001032339	4423	Xenopus (Silurana) tropicalis SET domain containing (lysine methyltransferase) 7 (setd7), mRNA	1	810	966	no	3	0	1100	MMKPSLMCQHHTTHITNIVHLWDTRQTIPSHPTVCMTLLSTLALGPSSASEL
setd7	NM_001032339	4424	Xenopus (Silurana) tropicalis SET domain containing (lysine methyltransferase) 7 (setd7), mRNA	1	51	273	no	3	0	1100	MMTDYLTGFALSTTAQLIGLRGILYMEKKMDVESSTSLMEALWKVFMLMMHFKAKGFTLMKMEARFMALMWKGN
elf2	NM_001006749	4444	Xenopus (Silurana) tropicalis E74-like factor 2 (ets domain transcription factor) (elf2), mRNA	2	76	286	no	1	60	1641	MRDLPTSLICSSEPWKHRFMAAMFTARIRLLRLRKHCFTWSRLLSCEIPGAPWKSMFPHVSPLLNSFMRL
elf2	NM_001006749	4445	Xenopus (Silurana) tropicalis E74-like factor 2 (ets domain transcription factor) (elf2), mRNA	2	445	655	no	1	60	1641	MDPQNWESRRSKGKAKAIPLTCGSFCWTCCRIRTPVHVTLSGLREKRESSSWWIQRPSPDYGGSIRTSQI
pcdh10	NM_001079015	4467	Xenopus (Silurana) tropicalis protocadherin 10 (pcdh10), mRNA	1	3141	3411	no	3	509	3536	MTPQIEVNLLARICSLTAQKSAKHWVTQTAVGCLPLYLLLMAARRQTTAVTFMCPVWTRFRTQRCLKHLRCSPEGRGHFQLLAKRRLCKG
larp1b	NM_001127989	4499	Xenopus (Silurana) tropicalis La ribonucleoprotein domain family, member 1B (larp1b), mRNA	1	2793	2934	no	3	323	3296	MRSLDSLLWRKQKKTTGMAWNVYSGFTVMDWKGNSGKNYSRTSRKKL
fat4	XM_002932058	4527	PREDICTED: Xenopus (Silurana) tropicalis FAT tumor suppressor homolog 4 (fat4), mRNA	2	6508	6709	no	1	0	9765	MALLESPVREISMSASLPPAKMVLFARISQEALTVSAKLAQQVNYVNLLLITVNATPVLMGHPAKVV
coro1c	NM_204052	4537	Xenopus (Silurana) tropicalis coronin, actin binding protein, 1C (coro1c), mRNA	2	913	1177	no	1	135	1575	MKWTLAMEFCYHFMIQTQVSFTCVERVIAVFGILKSQMSLHMFTTSTHSAVRNHSEGWAICQREGWMSTSVKLPGSTNCMRGSASQSS
LOC100495893	XM_002932081	4542	PREDICTED: Xenopus (Silurana) tropicalis protein phosphatase Slingshot homolog 1-like (LOC100495893), mRNA	1	900	1203	no	3	446	3371	MEMGASALILQAKPMCSNLCLSRPCGQPFKYFIRPVRLPGVLITFLEVCLLSGLLTMRAASALSKAASMSGTPCRIWNLPAQIPPLFLWRSLVRGRGLSGL
ung	NM_001016580	4569	Xenopus (Silurana) tropicalis uracil-DNA glycosylase (ung), nuclear gene encoding mitochondrial protein, mRNA	3	875	1148	no	2	166	1075	MVWFSCCGELMLRRKAAILTERGTLFSKLCTLLPSQPTEAFLAVVISPKQMPTFRDWKKSLLTGKLCDEHYDVLEMQIHFFCMFATFSKHL
acacb	NM_001137614	4575	Xenopus (Silurana) tropicalis acetyl-CoA carboxylase beta (acacb), mRNA	3	5297	5537	no	2	160	7321	MAVRLLSSAMILPTRLAPLGHKKICFSSKLQSWPEKKAFHVFTLQPIVVPVLGWQRSCGTCFRWLGTILLTLIRVSNIFI
acacb	NM_001137614	4576	Xenopus (Silurana) tropicalis acetyl-CoA carboxylase beta (acacb), mRNA	3	5912	6227	yes	2	160	7321	MECLTPWYLMILRECIPFFSGFPTCQRITKVLCLLFPLWTQLTVRLSSCQPRLPMILAGCLPGDRIQLSKENGSEAFLTMEALWRSCSAGLKLLLLAGHDLEEYL
acacb	NM_001137614	4577	Xenopus (Silurana) tropicalis acetyl-CoA carboxylase beta (acacb), mRNA	3	725	917	yes	2	160	7321	MALQQSSACVPSGDGHTKCSGMKEQSVSWSWLPQKTSKLMQSTSKWLITMCQSQEDPITTTMLM
kctd10	NM_001016558	4593	Xenopus (Silurana) tropicalis potassium channel tetramerisation domain containing 10 (kctd10), mRNA	3	635	770	no	2	10	949	MRYAVGRSMDRDEKLQRFAVPPLCMLQKRNKQRWSFLKHEYMKKL
LOC100496204	XM_002932083	4616	PREDICTED: Xenopus (Silurana) tropicalis transient receptor potential cation channel subfamily V member 4-like (LOC100496204), mRNA	2	1174	1351	no	1	0	2604	MKKLGISHESSGIGHMAQFIPRFMTCLCWIPVGKRFLYWKSWFTTVRLRTAMRCWQWSP
git2	NM_001016917	4627	Xenopus (Silurana) tropicalis G protein-coupled receptor kinase interacting ArfGAP 2 (git2), mRNA	2	679	808	no	1	165	2352	MLQPKQVRFFRLSYWQYMVQILAHQILLAKLLLTMQGKVATMS
LOC100493432	XM_002932067	4640	PREDICTED: Xenopus (Silurana) tropicalis hypothetical protein LOC100493432 (LOC100493432), mRNA	3	86	308	yes	2	142	400	MVPPRIMAMPLLIPLSLWVWRGQAQTDSASPEESHRAYTVLLKQNLVLLGSILCILFIAMILLAVCVYKPVRRR
ttc28	XM_002932099	4752	PREDICTED: Xenopus (Silurana) tropicalis tetratricopeptide repeat protein 28-like (LOC100485210), mRNA	2	2758	2893	yes	1	0	6837	MDTGLWGICNSPSYALKRGLWLLMNWGKRQTKPRHMESWETCTVS
rplp0	NM_203736	4799	Xenopus (Silurana) tropicalis ribosomal protein, large, P0 (rplp0), mRNA	2	637	1009	no	1	60	1002	MTMAASIVQRCWISLRRPCMFASLRVFVMLPVSVFRLVIPPWPLCLTQSSMDTSVSLPLQLKQTTASPWPTRSRHSWQIHQPLLLLLPLLTWLLLLLLLLLRRKSKKSLRNLMMIWDLVSLTKP
rplp0	NM_203736	4800	Xenopus (Silurana) tropicalis ribosomal protein, large, P0 (rplp0), mRNA	3	137	311	no	1	60	1002	MLHCGGGQCWFKTNAADPYVPAWKSCGAHGKEHNDAQGYSWSSGKQPSSGETSISHQG
rnf10	NM_204057	4828	Xenopus (Silurana) tropicalis ring finger protein 10 (rnf10), mRNA	3	473	647	yes	2	346	2338	MAIAPSNDIIGNEKILTLKMRLSLVSPGAPVHRKAKLLTRFHHKEVDLSSMEWEGGKR
pop5	XM_002932104	4837	PREDICTED: Xenopus (Silurana) tropicalis processing of precursor 5, ribonuclease P/MRP subunit (pop5), mRNA	3	158	353	no	1	0	366	MFHKHITCWGYNTHLSEIPYSIQQKSAATVNEELHQCSGERSYPPIITKLFLEKLGRTRICAQQK
mlec	XM_002932080	4842	PREDICTED: Xenopus (Silurana) tropicalis malectin (mlec), mRNA	1	924	1068	no	3	182	1010	MPLTTAASCFPSWWPLECLSPHSSVCVGYKQPAASLFLFVVFLALVFQ
capza1	NM_001017324	4940	Xenopus (Silurana) tropicalis capping protein (actin filament) muscle Z-line, alpha 1 (capza1), mRNA	2	103	301	no	1	75	933	MKRRCALQLSSLPMHPQENSTRCLMMSDFYSTMTTCSGKEQPMLLPNITWISLHLLRLKATMTQSL
celsr2	XM_002932136	5036	PREDICTED: Xenopus (Silurana) tropicalis cadherin EGF LAG seven-pass G-type receptor 2-like (LOC100495786), mRNA	2	5281	5524	no	1	0	8298	MATCVIVPQVIMEHTVKIGLINLVHVAGGVILCVAHVTVMLTVALTQTVIRQQASAVVRIIITVPSGLHFVYFVIAMPLDQ
LOC100493529	XM_002932123	5045	PREDICTED: Xenopus (Silurana) tropicalis synaptotagmin-2-like (LOC100493529), mRNA	1	1236	1443	no	3	125	1409	MTNWVRMKLLVKSSLDAMPLELNSDTGLTCWQIHGAQLPSGTLSSLRRKWTLHWGPRNKCLKHKHAPPP
LOC100486719	XM_002932141	5076	PREDICTED: Xenopus (Silurana) tropicalis single-minded homolog 1-like (LOC100486719), mRNA	2	1369	1717	no	1	0	2289	MIDTTIVSRVKEADVRLADTFLEVLRLEERPGGVLDLCCLFQRPLQMEKTYMRLPCHTLHQVTEHMEEVIGKKIVLSVLLIQALQVNQGIVTALINIKIVIMNQAKLKLLYVLPSR
LOC100490064	XM_002932159	5078	PREDICTED: Xenopus (Silurana) tropicalis melanin-concentrating hormone receptor 2-like (LOC100490064), mRNA	3	872	1058	no	1	0	1227	MGDVSSKQICRTIQQQHTETESPASYQNGTRFGGGLYCQFCPLPCDTDCEPSDFSAITNFLR
ccnc	NM_203826	5089	Xenopus (Silurana) tropicalis cyclin C (ccnc), mRNA	2	847	1189	no	1	135	984	MNSGRTLMRERKWLLFLIKCRNPSLPLTVKVNKEQMEAKALGTVSLDIFLNSIRGPSWIKVLPLLRSQRLPFSKASCKIRGFLHVTDTFFKSLLLKICVFCTEHNELLIWLKEN
csdc2	NM_001100248	5129	Xenopus (Silurana) tropicalis cold shock domain containing C2, RNA binding (csdc2), mRNA	3	425	581	yes	2	187	640	MASSPLKMEQKTYLCTFLILRESMCQSRETRLHSRCAQFHPRTRNFRLWRSS
cdc73	NM_001016031	5162	Xenopus (Silurana) tropicalis cell division cycle 73, Paf1/RNA polymerase II complex component, homolog (cdc73), mRNA	3	434	611	no	2	10	1603	MRNAYVLTRSAWLLDWKDIKKALWRQNKFAHSQRLCLLRKLLLSKQRSWQRNDPPSKLI
LOC100487440	XM_002932145	5164	PREDICTED: Xenopus (Silurana) tropicalis beta-1,3-galactosyltransferase 2-like (LOC100487440), mRNA	2	853	991	no	1	0	1263	MHQTVTKTANGTCPRIYTQVSVTQYFAQGLAMCSLGTWQRKSSKCL
camsap1l1	XM_002932151	5215	PREDICTED: Xenopus (Silurana) tropicalis calmodulin-regulated spectrin-associated protein 2-like (LOC100488548), mRNA	2	76	202	no	1	0	4359	MILIELKRPAICHGWWPKPMEQKMSPRSSRSRFILTSMTKST
zbtb41	NM_001123429	5261	Xenopus (Silurana) tropicalis zinc finger and BTB domain containing 41 (zbtb41), mRNA	3	1793	1973	yes	2	94	2638	MAVLTGSTFVSIMMTRDMNVRSVGRLSFAMIISQNTRRYTLVRKPISVRNVGNVLDVETT
znf800	NM_001127423	5295	Xenopus (Silurana) tropicalis zinc finger protein 800 (znf800), mRNA	3	1520	1844	no	2	118	2188	MKKRAYLQHKKVKQNPMQSLPRLVQVTRRNSRSPNFQLALTSSSFTVNFVKDSSHQNRILQSILNCIQMATTFMLSFTDVLFVAMKPVGNVMSLDTLLLCIKSHNGLL
mov10l1	NM_001079156	5349	Xenopus (Silurana) tropicalis Mov10l1, Moloney leukemia virus 10-like 1, homolog (mov10l1), mRNA	3	3305	3488	no	2	82	3814	MVSGVQRCEKEAIHLGLTPQKPSRRCDTAAFLLNMLLHQCLLRTLVSSLHIENRWKKLEHC
LOC100497723	XM_002932184	5358	PREDICTED: Xenopus (Silurana) tropicalis serine/threonine-protein kinase pim-3-like (LOC100497723), mRNA	1	999	1161	yes	3	341	1310	MEDQQPFGLWACFCTTWFAEIFPLNKMKRLSASAYISEEGSLQSASNLSNGAFP
celsr1	XM_002932203	5412	PREDICTED: Xenopus (Silurana) tropicalis cadherin, EGF LAG seven-pass G-type receptor 1 (celsr1), mRNA	2	2950	3079	no	1	126	9057	MPPSSKVTNWTYMWRRTARLGQLWQGSLPVTQMKAPTLRSCTR
celsr1	XM_002932203	5416	PREDICTED: Xenopus (Silurana) tropicalis cadherin, EGF LAG seven-pass G-type receptor 1 (celsr1), mRNA	2	8377	8590	no	1	126	9057	MIRTQIVRIPLMNTAAYMPPHTPQTARKMGLTQRKNGSKPVLKTMREALCIALLKLILSPIMLNLTGLLTV
celsr1	XM_002932203	5421	PREDICTED: Xenopus (Silurana) tropicalis cadherin, EGF LAG seven-pass G-type receptor 1 (celsr1), mRNA	2	5725	6055	no	1	126	9057	MFLRARESLALHMDTPVNVEQTTMGSTVRTRLIYRVQGAGGEILSVGLVTVKSVKALTLTATRQMESAGVRKTTTDQRKVTLATHVTASHLVLMHVAVIWRQDNVPASLE
kif21a	XM_002932195	5445	PREDICTED: Xenopus (Silurana) tropicalis kinesin-like protein KIF21A-like (LOC100485713), mRNA	3	389	569	no	2	232	5218	MSSILIQGRRKSICSALKSLLKAVLKDTMPLFLLMAKQVQAKPTQWEQDLMLTYLRKSMV
LOC100490639	XM_002932206	5467	PREDICTED: Xenopus (Silurana) tropicalis myosin-11-like, transcript variant 2 (LOC100490639), mRNA	2	4420	4588	no	1	0	5943	MQMKETELRQRQEKRRPKLCHWPGHLMKHYNPKKSLRGQTNYLKLRWKTWSAPRMM
LOC100490639	XM_002932205	5475	PREDICTED: Xenopus (Silurana) tropicalis myosin-11-like, transcript variant 1 (LOC100490639), mRNA	2	4417	4585	no	1	0	5940	MQMKETELRQRQEKRRPKLCHWPGHLMKHYNPKKSLRGQTNYLKLRWKTWSAPRMM
xylt1	NM_001126940	5501	Xenopus (Silurana) tropicalis xylosyltransferase I (xylt1), mRNA	3	284	422	no	2	7	2773	MATFPTAPKRNSGQTATTKTLSLKTLRTSTTVILPQGLNGTSTKRS
xylt1	NM_001126940	5502	Xenopus (Silurana) tropicalis xylosyltransferase I (xylt1), mRNA	3	1247	1388	no	2	7	2773	MGETMQDLSENRVWIACFLNVTRICGDLGIERSQKALMWMVALIGSC
smg1	XM_002932221	5527	PREDICTED: Xenopus (Silurana) tropicalis serine/threonine-protein kinase SMG1 (smg1), mRNA	2	76	232	no	1	0	10473	MDHTLQIQLGLLDKNMMISESKQMCRMKRKAATVSMVDLEKVLLVGSRWGKS
smg1	XM_002932221	5534	PREDICTED: Xenopus (Silurana) tropicalis serine/threonine-protein kinase SMG1 (smg1), mRNA	2	6142	6298	no	1	0	10473	MEPLLCLAFTNVGSRGKLLYKHKRLKIPIRHPKILQWYHDLVSYITAKLVLL
LOC100491763	XM_002932212	5556	PREDICTED: Xenopus (Silurana) tropicalis G-protein coupled receptor family C group 5 member B-like (LOC100491763), mRNA	2	1216	1477	yes	1	186	1347	MGVWEAGPVLHSEATCTSLLRWQLCLMVGQSQPLHQVTLEDICGEKAYRAQGVPDTVYPLWPCLCEGGMSKVTERSRTASWSSANPT
LOC100491763	XM_002932212	5557	PREDICTED: Xenopus (Silurana) tropicalis G-protein coupled receptor family C group 5 member B-like (LOC100491763), mRNA	2	1021	1195	no	1	186	1347	MLSLRSTAPFSQPHKKIQLIILIHLNLVCGKLLSRKIFSSPGAIWRIKLSLWMNIMQQ
eif3b	NM_001016724	5604	Xenopus (Silurana) tropicalis eukaryotic translation initiation factor 3, subunit B (eif3b), mRNA	3	545	926	no	2	124	2152	MSGKHLKNNHLKILGIFALGLRILTAEISSVLYMNRVIVPLSSGLMLRSRSQLRREQDGLRHMYAGLQKALTLPPFIREVLHYGVEKSSSKFRDSATRVFSSSTFHRVKGIWLHLALLWTLKRNHKP
zfat	NM_001079573	5614	Xenopus (Silurana) tropicalis zinc finger and AT hook domain containing (zfat), mRNA	3	2228	2366	no	2	145	3739	MANWSVNTAASCSGTKYTTTCTYGLTRGSICTTAHSAATLPLPKTA
khdrbs3	XM_002932217	5618	PREDICTED: Xenopus (Silurana) tropicalis KH domain containing, RNA binding, signal transduction associated 3 (khdrbs3), mRNA	1	1002	1257	no	3	218	1244	MENMITTTATARLTMSRVTTPTTITITHKDKVQQITMITDMVSGKIPTTPMGKKTGLTRGTKHHPQEHAKEPTESSHMQDTDCTV
khdrbs3	XM_002932217	5619	PREDICTED: Xenopus (Silurana) tropicalis KH domain containing, RNA binding, signal transduction associated 3 (khdrbs3), mRNA	1	585	735	no	3	218	1244	MTTSMSSSKCLLPQQRPTPGWDMHWKKSRNFSFLIIMMKSDKHNCKNSPI
gdf5	NM_001135117	5637	Xenopus (Silurana) tropicalis growth differentiation factor 5 (gdf5), mRNA	2	994	1294	no	1	0	1488	MRKLFFSSLVGQRNGTYSSMRLKPGLAKMTKLSMNIYLIRGERDELLCQLGKGRGQTRIPKQDVARNHFMSILRIWVGMIGLLHLWSMRHIIVKGFVSSL
LOC100487541	XM_002932231	5639	PREDICTED: Xenopus (Silurana) tropicalis NT-3 growth factor receptor-like (LOC100487541), mRNA	2	4	247	no	1	0	2478	MCCFCLASAVSGGFCYCGAFGWTPWGRLALLTVCATAPRLTARSRTMGISFPCWKGRNLGPAMATLSLTSLTSPGISLQYI
det1	XM_002932232	5652	PREDICTED: Xenopus (Silurana) tropicalis de-etiolated homolog 1 (det1), mRNA	3	272	452	no	2	103	1765	MWKSHLVFFANFHLMAGILLHFLQIRPPLKSMSIRAVRQRKISYMGMKGKYWQILMTRGL
rlbp1	NM_001005455	5676	Xenopus (Silurana) tropicalis retinaldehyde binding protein 1 (rlbp1), mRNA	1	576	759	yes	3	116	1067	MAELSSFLTLKVGTMKRSPSMRSCELTALYWRACWRMRRLRLMASALLKISKDSPCSKHQA
LOC100488393	XM_002932235	5700	PREDICTED: Xenopus (Silurana) tropicalis DNA polymerase subunit gamma-1-like (LOC100488393), mRNA	2	2296	2443	no	1	168	3759	MFQAAGSTSCHTKMAMLIMLEAHLQRTFCQRWKMALYRLVLEIPVQHVP
kif7	NM_001102886	5712	Xenopus (Silurana) tropicalis kinesin family member 7 (kif7), mRNA	2	301	505	no	1	120	750	MRLAAKMQHITPVYSHYLRLSFKDLMSLCLLMGRLAQEKPTPLARQAYLQYLRMSRELYHGLWLKFLS
LOC100491930	XM_002932255	5748	PREDICTED: Xenopus (Silurana) tropicalis transmembrane protein 2-like (LOC100491930), mRNA	2	2152	2338	no	1	0	4236	MLQEGHRMLAYGSYSTEFPLAFVKDSMLKDIQNLPHWGCFTTTGYTPTSRPDYSLAKESKPQ
LOC100492102	XM_002932256	5753	PREDICTED: Xenopus (Silurana) tropicalis protein KIAA1199-like (LOC100492102), mRNA	2	2092	2251	no	1	0	4176	MLSPPSGWRTPTTTLSTAQLQGLKKLDSGLFSIMCLLDHLKDCTLRGTQNTPH
idh2	NM_001004799	5782	Xenopus (Silurana) tropicalis isocitrate dehydrogenase 2 (NADP+), mitochondrial (idh2), nuclear gene encoding mitochondrial protein, mRNA	2	742	886	no	1	138	1503	MELPQRNGKCSTFLLEVSAWACTTQMSPSLGLHTAAFSIPYRKSGPCI
unc45a	NM_001008189	5815	Xenopus (Silurana) tropicalis unc-45 homolog A (unc45a), mRNA	2	1174	1402	no	1	66	2880	MTLNVMQKGRISTSFVRIMYGACLKAMVWMENYARYRLCPAFCRDLLRLVIELWSLQVSWKVSYPSVPLNGKLISR
man2a2	NM_001006776	5819	Xenopus (Silurana) tropicalis mannosidase, alpha, class 2A, member 2 (man2a2), mRNA	1	375	732	no	3	134	2861	MLRASPFCSHTTLLMELGSCHLTPDLASTLYLLRTVSFLWQINGKRQICRCLMFIRSCLLITLMEVFGNKALILLMTLRSGTMNHCRCLWFHIRTMTLVGSKPLISITMTRRSISSTTW
man2a2	NM_001006776	5820	Xenopus (Silurana) tropicalis mannosidase, alpha, class 2A, member 2 (man2a2), mRNA	1	1317	1479	no	3	134	2861	MWLKGPTFSWISTKRNPSYIAVKWCWCLWEMTFAMIKSKSGMLSSSTTKSCLTI
furin	XM_002932241	5832	PREDICTED: Xenopus (Silurana) tropicalis furin (paired basic amino acid cleaving enzyme) (furin), mRNA	3	1169	1355	no	2	313	2665	MFGPLAMVEENMTVVTVMATPTAFTHSLLAAPPRWGMFLGTARHVLPPWRLRTAVATRMRSK
mfap1	NM_001011003	5841	Xenopus (Silurana) tropicalis microfibrillar-associated protein 1 (mfap1), mRNA	2	1150	1372	no	1	96	1416	MEMKMYIKGISVHPPWRIILIRLYCPRSCRSRILDVQVGQNILTWLIRTPLHLTLLGVRTIHRTQSSSNRRQQE
ppip5k1	XM_002932263	5879	PREDICTED: Xenopus (Silurana) tropicalis inositol hexakisphosphate and diphosphoinositol-pentakisphosphate kinase 1-like (LOC100493265), mRNA	1	885	1101	no	3	266	5261	MFISITQHLLGVVARGCLERLAAVAVYTHQRAAYERPDHIYMKNSCQLMALMLRSTLLVQTMHMQKRENHLL
iqgap1	XM_002932266	5934	PREDICTED: Xenopus (Silurana) tropicalis IQ motif containing GTPase activating protein 1 (iqgap1), mRNA	3	359	533	no	2	337	5269	MGSFVPTMALSLMMRDLQQRRWMREGVKMLPMNTCAIWRKPKDGWRHAWGKNYHPPLS
iqgap1	XM_002932266	5938	PREDICTED: Xenopus (Silurana) tropicalis IQ motif containing GTPase activating protein 1 (iqgap1), mRNA	3	3908	4040	no	2	337	5269	MPLTSLTSLLEDSSPQISEGTWVLLQRCFSMLHPTRCSLETMLI
mrps23	XM_002932272	5979	PREDICTED: Xenopus (Silurana) tropicalis mitochondrial ribosomal protein S23 (mrps23), mRNA	3	497	650	no	2	268	829	MKHMVMDQEHLNYLGQTLSLHVNDLWKNMQNFRKWEKRMKASCLKRQEKHF
LOC100487082	XM_002932286	5988	PREDICTED: Xenopus (Silurana) tropicalis myosin-6-like (LOC100487082), mRNA	2	3961	4138	no	1	78	5787	MHWLMHCNLPGMTVISLGNSSMKNKKLKQSYSAVFPKAMLKWQHGEINMRQMLFRGQKN
LOC100487082	XM_002932286	5989	PREDICTED: Xenopus (Silurana) tropicalis myosin-6-like (LOC100487082), mRNA	2	1345	1648	no	1	78	5787	MQLVHWPKAFMTVCLNGWLFALTRHWIQSYQGSSLLVSLILQDLKFLISTALNSSASILQMKNCNSFSIITCLYWNKKNTRRKALTGNLLILDWTCRPVLI
LOC100487237	XM_002932287	6006	PREDICTED: Xenopus (Silurana) tropicalis HMG box transcription factor BBX-like (LOC100487237), mRNA	2	790	955	no	1	0	2490	MRYLPAHHIQMTQHLLNKARSQHCFSLPRYLQILHRHRLIVWILQNAVGTLPFSN
cblb	NM_001006801	6010	Xenopus (Silurana) tropicalis Cas-Br-M (murine) ecotropic retroviral transforming sequence b (cblb), mRNA	3	2537	3002	no	2	220	3166	MSLPPVLYQSLCLQHELQREKTTHMVLLLPGLHLIMIFWFPIQVRSLLTVPLPRSPHHLPQHAPVSLNMPCPLRRDADRTQTWICSFLIRIPVQKPRYLQPVEDQGKLNQTDFHKSMISFHHVQIVPKHQRDPPSQCPAGLRQKYTTGDITIVTH
LOC100487868	XM_002932291	6095	PREDICTED: Xenopus (Silurana) tropicalis CAP-Gly domain-containing linker protein 2-like (LOC100487868), mRNA	3	1172	1394	no	2	490	3046	MWERRILQKENGVEWSWMSHLGKMMGQLLEQGIFSVLQSLAFLLQFTKSSGLAFHLLARLRPKKAKGWLWEYLP
gatsl1	NM_001011019	6109	Xenopus (Silurana) tropicalis GATS protein-like 1 (gatsl1), mRNA	2	1018	1240	no	1	291	1278	MYRHSRGSLVICCLQVRQESFGRWFELAGSLLDLMNVGSLHRSQNPWLLLTSQHIISVPLSLIMHWYPKRTSMV
znhit1	NM_001017056	6224	Xenopus (Silurana) tropicalis zinc finger, HIT type 1 (znhit1), mRNA	2	346	589	no	1	315	774	MTPTSGGYWTPLLASGDSTGSSRPWRKIISKMIPMQICPNSSACPSLMMRRKPEKRRRKPAGITLSSDFAKTSRRCWRSRI
LOC100493267	XM_002932376	6244	PREDICTED: Xenopus (Silurana) tropicalis gem-associated protein 5-like (LOC100493267), mRNA	2	1915	2200	no	1	0	4416	MPDWCLPVMMVLPRYGMFCRKSHSVTIVGTKEDCFLFSGLLWSQTRCGQELMTFAFIAGLYQSKSIAGLPKGKKPLSLKKSVPFNQNQKPRRRKS
LOC100493267	XM_002932376	6247	PREDICTED: Xenopus (Silurana) tropicalis gem-associated protein 5-like (LOC100493267), mRNA	3	1046	1208	no	1	0	4416	MLGSGFPVLLLVPNFPRWLCIQPSFLPGSSWQPGCWGGGQHDPCMEYNVGCQCI
LOC100492986	XM_002932299	6275	PREDICTED: Xenopus (Silurana) tropicalis potassium voltage-gated channel subfamily A member 2-like (LOC100492986), mRNA	2	388	517	no	1	0	1500	MMKGLSRRKSDLCQRMTSRGRSGCCLNTLRVQDLPGALPLSLF
larp1	NM_001142193	6308	Xenopus (Silurana) tropicalis La ribonucleoprotein domain family, member 1 (larp1), mRNA	1	1722	1842	no	3	176	3212	MSQRNWTLCLMRKWSKWTGGRILLLTGQTRTLTMRSMIEM
canx	NM_001005668	6325	Xenopus (Silurana) tropicalis calmegin (clgn), mRNA	1	993	1248	no	3	47	1865	MTGMRMLLQRSQMKMLSNQKAGWMMNLNTFLIQMQRSQRIGMKIWMGNGRHHKWQILSASLLPVVECGNVQLLTIPATKANGSLQ
LOC100493479	XM_002932302	6337	PREDICTED: Xenopus (Silurana) tropicalis catenin alpha-1-like (LOC100493479), mRNA	2	1783	2029	no	1	0	2586	MILILKLKTLMCEAEQVSRLKMTSSLLDRVQEQSWLSSLRNKRPKLQNKWLASRRKRVNWMLRCRNGMTMETTSLFWPNRCA
cript	NM_001016794	6389	Xenopus (Silurana) tropicalis cysteine-rich PDZ-binding protein (cript), mRNA	1	150	330	no	3	0	305	MEKTSLQYVVSVRAPFTSLALTTVRAVPIRKVSVPCVERRFWRQRIISKHQFSTGHSGFL
pigf	NM_001016071	6392	Xenopus (Silurana) tropicalis phosphatidylinositol glycan anchor biosynthesis, class F (pigf), mRNA	3	590	737	no	1	111	768	MQCCGRLAWGIPYTIRLGQAMAGLANILLTGCYPWVCGWSSHSTSVDLL
six2	NM_001100275	6420	Xenopus (Silurana) tropicalis SIX homeobox 2 (six2), mRNA	2	682	874	no	1	255	1122	MPTTPTPRPGKRGNWPRPPDSPRLRSATGSKTGGRGTERPRPRKGTRKIMKTPTPTATTHCPLR
LOC100498093	XM_002932389	6425	PREDICTED: Xenopus (Silurana) tropicalis homeobox protein SIX3-like (LOC100498093), mRNA	2	286	565	no	1	0	903	MSPSCGPGPWSPSTPATSGTSTISWRITSSPRSPTGSCRPCGWRRITRRRRSSGGAPWGRWISTGYGRSSPCPAPSGTESRKRTASRRGLAAS
camkmt	NM_001016430	6431	Xenopus (Silurana) tropicalis chromosome 2 open reading frame 34 (c2orf34), mRNA	2	643	796	no	1	132	1026	MKKYLKTGLCQAEFCDGIMRQMSLNWKDILTLLFVQTACFWTSTEPALLMQ
zfp36l2	NM_001102953	6466	Xenopus (Silurana) tropicalis zinc finger protein 36, C3H type-like 2 (zfp36l2), mRNA	1	519	696	yes	3	296	1295	MGSVASTSCTYNSSNSRKLGRRSTLPATRPSCAGRLRKVGHASMGRSASLLMAFTSCAA
rcor3	XM_002932399	6502	PREDICTED: Xenopus (Silurana) tropicalis REST corepressor 3 (rcor3), mRNA	2	652	832	no	1	18	1551	MIVIMTLKKKQKRRQVQNPASNPSRLLLAEENTRVYSTDTIHNALSAAPRKACTYPRKMW
eomes	NM_001128652	6521	Xenopus (Silurana) tropicalis eomesodermin (eomes), mRNA	1	1740	1890	no	3	188	2189	MKQTTPQVPSSPMALSLCPSKPPTQWPTTQMQPSLPWQAGEAEVLHIRGK
slc4a7	XM_002932401	6533	PREDICTED: Xenopus (Silurana) tropicalis solute carrier family 4, sodium bicarbonate cotransporter, member 7 (slc4a7), mRNA	1	486	672	yes	3	236	3986	MEENLPIMTPLPSVCSLFLALKMMMKSTFLMTFSQKWMNCVSGMVRNVNGRKLQGGSNLKKM
slc4a7	XM_002932401	6534	PREDICTED: Xenopus (Silurana) tropicalis solute carrier family 4, sodium bicarbonate cotransporter, member 7 (slc4a7), mRNA	2	3211	3400	no	3	236	3986	MLCPRRAAKILGNKRTASNWASDLCFDGALRFHDICFKVYSNASPLWCFPLHGCFIAQRHSAF
LOC100488447	XM_002932403	6551	PREDICTED: Xenopus (Silurana) tropicalis peptide-N(4)-(N-acetyl-beta-glucosaminyl)asparagine amidase-like (LOC100488447), mRNA	2	1495	1690	no	1	45	1950	MLIHVSQITMRLLLAGKMECGKQSQCVEKLKMTGKWFTWLVLRVPHQLLLAGRLNVLQWASKLKA
LOC100488600	XM_002932404	6559	PREDICTED: Xenopus (Silurana) tropicalis retinoic acid receptor beta-like (LOC100488600), mRNA	2	124	514	no	1	0	1362	MDFVVSRQQVAAVPHPQQLLKPRARVQKTWYQVRHHHPHHLEFTSPVLSVRISHLGITMESVHVRDARVSSGGVFRKTWYILVTEKRTALSIKLQGIVASTAGYRGALKWACPKNPSEMTETRKRKSLQR
ube2e1	NM_203701	6581	Xenopus (Silurana) tropicalis ubiquitin-conjugating enzyme E2E 1 (UBC4/5 homolog) (ube2e1), mRNA	1	864	996	no	3	305	905	MIEWPDSGPRDMLHRFHMSLKLVCLSVTERAAGSFEWEMEGGSW
ube2e2	NM_001126511	6583	Xenopus (Silurana) tropicalis ubiquitin-conjugating enzyme E2E 2 (UBC4/5 homolog) (ube2e2), mRNA	2	349	523	no	1	324	927	MTVRALAEGALMETSGMGFKMSKIGKKYNPRRKRERYPAKQLPNCLLVPKEFRKNLQK
ube2e2	NM_001126511	6584	Xenopus (Silurana) tropicalis ubiquitin-conjugating enzyme E2E 2 (UBC4/5 homolog) (ube2e2), mRNA	2	886	1027	no	1	324	927	MTEWPDSGPRDTLHRNITKWTCASTFTKCINSSFLSFLFCFCFFFFF
LOC100490406	XM_002932415	6609	PREDICTED: Xenopus (Silurana) tropicalis potassium voltage-gated channel subfamily H member 8-like (LOC100490406), mRNA	3	1670	1829	no	1	0	3333	MPQVFVSTYQNLLLCSWGVPSTAGRCFAGNLFGVLRFYGSVKGWNGAGNSRKR
plcl2	XM_002932407	6621	PREDICTED: Xenopus (Silurana) tropicalis inactive phospholipase C-like protein 2-like (LOC100489093), mRNA	2	508	658	yes	1	252	3591	MASPAGAVLSRMVQSRRENARRLYHSAACQQRRRSVVQVTVLIPWLKGLN
plcl2	XM_002932407	6624	PREDICTED: Xenopus (Silurana) tropicalis inactive phospholipase C-like protein 2-like (LOC100489093), mRNA	2	2539	2680	no	1	252	3591	MLWIHTSTLRFTGSLQIVQSREQKQYIKMATIQFLMKVLNFRLTFLN
spsb3	NM_001017350	6735	Xenopus (Silurana) tropicalis splA/ryanodine receptor domain and SOCS box containing 3 (spsb3), mRNA	2	595	721	no	1	30	1110	MQRAGDSLTQAFSSTRETKATSPHALAKAPLLECTWTHGMEC
solh	NM_001113040	6783	Xenopus (Silurana) tropicalis small optic lobes homolog (solh), mRNA	1	1854	2019	no	3	56	3011	MILLMRMWGSDLGTLTPYWMFEMFKDSGFSGYATRGGASPGMEVGRTSGLSGQHP
crebbp	XM_002932428	6855	PREDICTED: Xenopus (Silurana) tropicalis small VCP/p97-interacting protein, transcript variant 1 (svip), mRNA	2	5347	5596	no	1	978	8259	MSQGISGLAHQVKATTTYFIATRLTKKSPSLNVCRSGIKRCWTRLLLSASFMTIRISLSKQPRIVSLVPRNFHTLKEISGLMY
crebbp	XM_002932428	6858	PREDICTED: Xenopus (Silurana) tropicalis small VCP/p97-interacting protein, transcript variant 1 (svip), mRNA	2	4438	4702	no	1	978	8259	MPGCTTERPPGSTNTALSLLKSLNRRLIPSCSLLAIAVGASLSSLLKLYAAMGSSCVPFHAMLPTSAIRIDTTSVKSASQRSRGRMSL
crebbp	XM_002932429	6874	PREDICTED: Xenopus (Silurana) tropicalis small VCP/p97-interacting protein, transcript variant 2 (svip), mRNA	2	5233	5482	no	1	978	8145	MSQGISGLAHQVKATTTYFIATRLTKKSPSLNVCRSGIKRCWTRLLLSASFMTIRISLSKQPRIVSLVPRNFHTLKEISGLMY
crebbp	XM_002932429	6876	PREDICTED: Xenopus (Silurana) tropicalis small VCP/p97-interacting protein, transcript variant 2 (svip), mRNA	2	4324	4588	no	1	978	8145	MPGCTTERPPGSTNTALSLLKSLNRRLIPSCSLLAIAVGASLSSLLKLYAAMGSSCVPFHAMLPTSAIRIDTTSVKSASQRSRGRMSL
LOC100492770	XM_002932461	6897	PREDICTED: Xenopus (Silurana) tropicalis zinc finger protein GLIS2-like (LOC100492770), mRNA	3	212	722	no	2	82	928	MMALLLLRPFAPHPHQGFGIGMETAPPFPLLPLWISASPHLLGMTPPADHRCPQKELQEGTPHLTTHRYAAEGILLPALFSFFCLSAPDFSCPLPCSCPPPKRSVFPWSTPSRNSWCVSGRSAIAYLSSCRNWWTMSTISMSSQRRMLGTAATGRAVLGGGEDSMPGIRC
LOC100492934	XM_002932462	6907	PREDICTED: Xenopus (Silurana) tropicalis coronin-7-like (LOC100492934), mRNA	2	2713	2863	no	1	0	2796	MPWWPNWETAMTHCPRMLLRGLMRMSGISTDLLCSQLYPHPSPLPSSSPM
foxj1.2	NM_001008142	6920	Xenopus (Silurana) tropicalis forkhead box J1, gene 2 (foxj1.2), mRNA	1	456	630	no	3	143	1256	MLISSHHIPMPPSSAWPWKPASSVNSPYPPFTAGSHRTSAIIGMLTQAGRTRSATTFL
tnrc6a	XM_002932465	6948	PREDICTED: Xenopus (Silurana) tropicalis trinucleotide repeat containing 6A (tnrc6a), mRNA	2	4405	4618	yes	1	0	5505	MAGLVPNRQMAPAVSTGPLNSVRVSHGKDIQTLTQKLTLMSLLAVSSTICQLILCGVLTTSGTETVGHPHL
tnrc6a	XM_002932465	6950	PREDICTED: Xenopus (Silurana) tropicalis trinucleotide repeat containing 6A (tnrc6a), mRNA	2	1474	1738	no	1	0	5505	MQELLVEVNEDGETQHKTLALIFQMVVGTNCLTISIPMRGKTKKMVGKRQIRGSLLRKRMQGKFQQDPKALRQMYGPKLQVRGKVKVV
tnrc6a	XM_002932465	6952	PREDICTED: Xenopus (Silurana) tropicalis trinucleotide repeat containing 6A (tnrc6a), mRNA	2	3643	3793	yes	1	0	5505	MAIPVCLVLAMQHKPGAHSSLQHNLLTHLSLTFVRKCLLPLYPLRFLLLY
prkcb	NM_001110043	6976	Xenopus (Silurana) tropicalis protein kinase C, beta (prkcb), mRNA	1	309	462	no	3	83	2093	MSLSRFPARAQIKGQHLMTPAANTSSKFTRTPARRSVTTAAHCCTASFTRG
LOC100488289	XM_002932434	6980	PREDICTED: Xenopus (Silurana) tropicalis voltage-dependent calcium channel gamma-3 subunit-like (LOC100488289), mRNA	2	478	604	no	1	0	951	MQETPGRVIPRRATIPMAGPSISVPCRSSSLRWWGCWPCTCL
e4f1	NM_001078698	6991	Xenopus (Silurana) tropicalis E4F transcription factor 1 (e4f1), mRNA	1	1095	1320	no	3	476	1928	MIGRTLVPSVARDTKPRMHSRSTLAPTWMRSHMSASTAPTASGRRALLSGTSGTTLVRSPSSATNVAEALPSMEL
epn1	NM_001006852	7087	Xenopus (Silurana) tropicalis epsin 1 (epn1), mRNA	3	1064	1193	yes	2	505	2242	MGSLGDLQLPTMAQRHPGSHRNWNKPGLRQVERRSYSCSWHSP
b9d1	NM_001016309	7095	Xenopus (Silurana) tropicalis B9 protein domain 1 (b9d1), mRNA	2	457	613	no	1	117	711	MQEPSQCLSQSHRPGCRGLPAGLWDGAPNSQIPRLWRKEKEEKLPESDPRGA
LOC100494894	XM_002932474	7099	PREDICTED: Xenopus (Silurana) tropicalis voltage-dependent T-type calcium channel subunit alpha-1H-like (LOC100494894), mRNA	2	7	334	no	1	0	7233	MARGKSPSSHWPETISGCPYPRHPKQGTPVKKRMREMQRSQLWAAWALEVLLEEVVNKGWARRKENRFHTQPWRPPSSSVSAKPRVHGTGASDWSVIHGSSMSACWSFC
LOC100494894	XM_002932474	7106	PREDICTED: Xenopus (Silurana) tropicalis voltage-dependent T-type calcium channel subunit alpha-1H-like (LOC100494894), mRNA	3	4556	4730	no	1	0	7233	MDAPVLHLLPPHRQLLRAQHVRRGGGRELPQVPATPGGGRGPAPGGETPPPPGEKAQE
LOC100494894	XM_002932474	7107	PREDICTED: Xenopus (Silurana) tropicalis voltage-dependent T-type calcium channel subunit alpha-1H-like (LOC100494894), mRNA	3	509	629	no	1	0	7233	MELAGFLHCYGRDVGIFPRWTQCQPIRYPHCTCFKAAKSH
acvr2b	NM_001006870	7158	Xenopus (Silurana) tropicalis activin A receptor, type IIB (acvr2b), mRNA	3	500	659	no	2	259	1789	MISTVTTDRNVLPRKKTPKCFSAAAKETTATRNLLICLKSKHLIRSPSLRPLC
LOC100486216	XM_002932490	7162	PREDICTED: Xenopus (Silurana) tropicalis hypothetical protein LOC100486216 (LOC100486216), mRNA	3	20	587	yes	1	0	582	MGVQRTMGVQRTMGVQLFNVQWVFNVQWVFNVQWVFNVQWVFNVQWVFNVQCVQHTMGVQRTMGVQRTMGVQRTMGVQRTMGVQRTMGVQRTMGVQRTMGVQRTMGVQRTMGVQRTMGVQRTSVQRTMGVQRTMGVQRTMGVQRTMGVQHTMGVQRTMGVQRTMGVQRTMGVQRTMGVQRTMGVQRTMX
LOC100487601	XM_002932498	7224	PREDICTED: Xenopus (Silurana) tropicalis sonic hedgehog protein-like (LOC100487601), mRNA	1	630	813	no	3	245	965	MRMGTTRRSRCITRGEQWTLPRRTGTAVNTGCWPGWRWKPGSTGSILSPRLTSTARSKQEV
mbtd1	NM_001006741	7241	Xenopus (Silurana) tropicalis mbt domain containing 1 (mbtd1), mRNA	1	192	513	no	3	110	2063	MIAAVRTPAAVPARMRVKRKSPPCHPVCPLSKTMGRFTHTQMANQEWQRVKCAEWLESEMPFILKQSGSAASHARGVIPQTPRRRVFWPDFRVNHLQRKLKSSRRSH
LOC100496414	XM_002932517	7252	PREDICTED: Xenopus (Silurana) tropicalis fox-1 homolog A-like (LOC100496414), mRNA	2	313	463	no	1	0	747	MKYHRQTAVSSYSVQRAQRSNNPRDYMCQISLSAFEILTYGRCLGNSGRF
LOC100497207	XM_002932519	7288	PREDICTED: Xenopus (Silurana) tropicalis hypothetical protein LOC100497207 (LOC100497207), mRNA	2	1429	1549	no	1	387	5124	MKKSMTKLWMFMPLECVCLKWLRLNILTLNAKTQHRSTAK
becn1	NM_001033940	7295	Xenopus (Silurana) tropicalis beclin 1, autophagy related (becn1), mRNA	1	879	1062	no	3	128	1463	MLRSSWTSLKRPMSSMPLFISGIAGSLAQLTTFVSAVCLVCQWNGMRLMQPGARLFYCFMH
cyth2	NM_001005039	7333	Xenopus (Silurana) tropicalis cytohesin 2 (cyth2), mRNA	2	505	637	no	1	150	1341	MISTSVFYMPLWSSMNLWTLTWCRHFVSSCGVSVYPERLRKSIV
LOC100498457	XM_002932526	7348	PREDICTED: Xenopus (Silurana) tropicalis cadherin-22-like (LOC100498457), mRNA	2	1855	2140	no	1	411	2799	MSLQALVFTAIGVLPAYLPIMRSFRQLVWWIGMSQWGDIDSTSDLRLSLLQSITSLCLMSKITQPQCIPIECHLTEESRTCSSFLSWWLTVGHLL
slc12a5	NM_001078838	7360	Xenopus (Silurana) tropicalis solute carrier family 12 (potassium/chloride transporter), member 5 (slc12a5), mRNA	1	1461	1611	yes	2	43	3148	MAIPLGHCDWIFFLYMWGRFAEFNRGPTSSTSNCSRWNCSVSPGLWSWES
slc12a5	NM_001078838	7364	Xenopus (Silurana) tropicalis solute carrier family 12 (potassium/chloride transporter), member 5 (slc12a5), mRNA	3	98	239	yes	2	43	3148	MEIPKRALHSLTAQRWTQERTWLYLRRKWTPVPWYPHSSAAWPITQT
mmp9	NM_001006842	7373	Xenopus (Silurana) tropicalis matrix metallopeptidase 9 (gelatinase B, 92kDa gelatinase, 92kDa type IV collagenase) (mmp9), mRNA	2	1132	1423	no	1	48	2058	MDGMTESCGVPLRPAMTKTASGASALIKGTVFFWWQPMSLAMPLVWSIVKFKMLSCTPCTATLKISNFMKMMCVGSNIFMVQVLVQILIHQSLLRSH
LOC100498615	XM_002932527	7380	PREDICTED: Xenopus (Silurana) tropicalis hypothetical protein LOC100498615 (LOC100498615), mRNA	2	2488	2758	no	1	390	3315	MLVMTHKRFSVSSAVINVDAGLHSRSTCIITREANHINARSVSTQVFTKRMWSGTQLCIEKIERRNPRRLQNQLPTHALFVAVYTPCKRG
LOC100485102	XM_002932528	7385	PREDICTED: Xenopus (Silurana) tropicalis zinc finger protein 335-like (LOC100485102), mRNA	2	1204	1540	no	1	0	1419	MNQAPHSCKTPRSTLSPCPLLSSSSPKNSSKLQRTLLSQPWQMQRWPRQCSVQKRSSLFRKRLNMILSHWGSECIPAGADTRDRIPTSAAFQCTLFYSCKMYLPNCHLIAAG
snrnp200	XM_002932535	7488	PREDICTED: Xenopus (Silurana) tropicalis small nuclear ribonucleoprotein 200kDa (U5) (snrnp200), mRNA	2	181	331	no	1	81	6501	MSPQERFSRWWGSWKELAWGTKLKKPSHRCRKKDDLREENEMKTGTTLTR
snrnp200	XM_002932535	7489	PREDICTED: Xenopus (Silurana) tropicalis small nuclear ribonucleoprotein 200kDa (U5) (snrnp200), mRNA	2	5086	5248	yes	1	81	6501	MARFMRMLIIPSMMSCKWWDMPTGPCRMMKGAVLLCAKDQRRISLKSSCMSLCL
snrnp200	XM_002932535	7491	PREDICTED: Xenopus (Silurana) tropicalis small nuclear ribonucleoprotein 200kDa (U5) (snrnp200), mRNA	2	685	829	no	1	81	6501	MCSLNQMRRKEMRIYMERCEMRHLMMIWTVMKLLCVVLCLLILHLPEN
mat2a	NM_204064	7565	Xenopus (Silurana) tropicalis methionine adenosyltransferase II, alpha (mat2a), mRNA	3	332	467	no	2	55	1243	MMTPPKGLTTRLAMCWLLWSSSPQILHRGFTWTEMKRMWGLETRV
mat2a	NM_204064	7566	Xenopus (Silurana) tropicalis methionine adenosyltransferase II, alpha (mat2a), mRNA	3	1016	1154	no	2	55	1243	MPLEFPTLSLFLFSTMGPLRKVRGSCWLLSRRTLICVQVSLSGIWS
tmem150a	NM_001016894	7582	Xenopus (Silurana) tropicalis transmembrane protein 150A (tmem150a), mRNA	1	60	267	no	2	130	943	MVCRGAPCTNCSSPPLNPWTLLTNDWLDCSSHQLDCVFHPRNMDCLRHGCNEPSRVSCGKLDLQPDVYR
usp39	XM_002932542	7598	PREDICTED: Xenopus (Silurana) tropicalis u4/U6.U5 tri-snRNP-associated protein 2-like (LOC100495792), mRNA	3	116	275	no	2	25	1528	MTLKTDVVAIAHIWIPLTGVSWTLILRSCVPSLFLTLMHMLALYAGNTSRVEA
camk2b	NM_001079449	7641	Xenopus (Silurana) tropicalis calcium/calmodulin-dependent protein kinase (CaM kinase) II beta (camk2b), mRNA	1	618	798	no	3	395	2015	MTVYPRKGSTISSLTWSQEGSYSKILWQESITVKQMQVIASSRFLKQSSTATKWGLFTGT
camk2b	NM_001079449	7643	Xenopus (Silurana) tropicalis calcium/calmodulin-dependent protein kinase (CaM kinase) II beta (camk2b), mRNA	2	829	1036	no	3	395	2015	MQRSCSQAGRLWFGHRSARGPTGLVWICRDSRVPVSRGSAKGSIRQTSRYLGMWCYSLHPFGWLPTILG
ogdh	NM_001142215	7672	Xenopus (Silurana) tropicalis oxoglutarate (alpha-ketoglutarate) dehydrogenase (lipoamide) (ogdh), nuclear gene encoding mitochondrial protein, mRNA	3	1769	1946	no	2	118	3172	MRKKFQNMTKFVRRLLPDLKMKRSFISSTGWTPPGPAFSPWTASPAACPVLLLGSVRRS
ogdh	NM_001142215	7673	Xenopus (Silurana) tropicalis oxoglutarate (alpha-ketoglutarate) dehydrogenase (lipoamide) (ogdh), nuclear gene encoding mitochondrial protein, mRNA	3	2273	2624	yes	2	118	3172	MVCLVLSWDLPWRAQMPWFCGRPSLEISTTRLNVSSTSLFVQVKPSGCGRMELFCCCHMVWRAWVQNIPLPDRNVSCRCVTMTPMCGRKFLKTLLFASFTTATGLLSTAPLRPVSSM
ykt6	NM_203692	7694	Xenopus (Silurana) tropicalis YKT6 v-SNARE homolog (ykt6), mRNA	3	596	875	no	2	157	751	MRPKLSCTTPWNHYYNVERNWMTWSVNLRSWGHSQRLSTKLHGSRTRAAASCDGRSDGRPNGHQTMNKHYNIRGSVLSPFSVRGGEYKRCCPG
loxl2	NM_001142048	7765	Xenopus (Silurana) tropicalis lysyl oxidase-like 2 (loxl2), mRNA	1	1800	2064	no	3	164	2465	MPPWWNKPHILKTDQCSCCSVPTKSSACPPLLIALALLLATAASCASAPRSTTTGRPTFALRLVGIPGYGTTAIAITTAWRFSPTMIC
loxl2	NM_001142048	7766	Xenopus (Silurana) tropicalis lysyl oxidase-like 2 (loxl2), mRNA	1	2073	2331	no	3	164	2465	MGPKWRRDTKPASASKIQSVKQMSRSSTPVLILGSKVSRWVAGTFTDTTLTASGSISQTLRRGITFSRLSLIQTRRWQSQTTQITS
loxl2	NM_001142048	7767	Xenopus (Silurana) tropicalis lysyl oxidase-like 2 (loxl2), mRNA	1	1173	1311	yes	3	164	2465	MENGERFVTINGTWSPPAWSAGNWGLAAPRKLLQEHRWAKEWATST
dock5	XM_002932583	7823	PREDICTED: Xenopus (Silurana) tropicalis dedicator of cytokinesis protein 5-like (LOC100488768), mRNA	2	4201	4342	no	1	0	5376	MRCRGFLTPDPFAEERRTPTMNLRPCGSRGPHSQQRINCLGFSNGLK
dock5	XM_002932583	7826	PREDICTED: Xenopus (Silurana) tropicalis dedicator of cytokinesis protein 5-like (LOC100488768), mRNA	2	4408	4588	no	1	0	5376	MRRSVTWFNSTGRTRASPCTLSLCSSVVLWIRRSWVASPTMKRLSSLNDTSRNIRWIRIS
ebf2	NM_203869	7846	Xenopus (Silurana) tropicalis early B-cell factor 2 (ebf2), mRNA	1	975	1119	yes	2	100	1825	MERAYHPPCDPGADTSEAHSRCGGGDTVLQIQTVLQRSPGEVYLHSFK
ebf2	NM_203869	7849	Xenopus (Silurana) tropicalis early B-cell factor 2 (ebf2), mRNA	3	1391	1535	no	2	100	1825	MGDSLASAYQSHRLITRVTSGTQAVSLHEDIPAVQPHSSLITAPPATA
ebf2	NM_203869	7850	Xenopus (Silurana) tropicalis early B-cell factor 2 (ebf2), mRNA	3	521	662	no	2	100	1825	MKVRTRTRRCAGCCSHTRSCAVAAVKRRAAGIGMRPRQIPSSLTGSS
sec22b	NM_203825	7867	Xenopus (Silurana) tropicalis SEC22 vesicle trafficking protein homolog B (gene/pseudogene) (sec22b), mRNA	2	451	580	no	1	21	666	MCRESWLLILKKFCFGEKHFQLWIRRPATCQPCQRSTAKMQST
prkab2	NM_001113101	7869	Xenopus (Silurana) tropicalis protein kinase, AMP-activated, beta 2 non-catalytic subunit (prkab2), mRNA	2	445	571	no	1	120	933	MTLLPFWTFQRESISTSFLWMANGYMTLLSLWLPASLVQSTT
pde4dip	NM_001079418	7879	Xenopus (Silurana) tropicalis phosphodiesterase 4D interacting protein (pde4dip), mRNA	2	625	862	yes	1	312	3630	MGQTPGQTPGQTADQRQRAAQWTYPSCQMCATRLCSRRTSPILAMSTGQSWTSRARSRSTASTLTPGESDPGAAVAAPA
LOC100496456	XM_002932586	7904	PREDICTED: Xenopus (Silurana) tropicalis muscleblind-like protein 3-like (LOC100496456), mRNA	2	1810	1960	no	3	1136	2159	MLSGEMQVLSSPCTLASQNKGSPAPGEPNRSSCHGSAAWSTSTFTKEAST
phf6	NM_001114223	7932	Xenopus (Silurana) tropicalis PHD finger protein 6 (phf6), mRNA	1	678	834	no	3	38	1127	MQEMKRMRQEASSMYLMQKRQRLITNACFFPLVQSSSPQHQGQNLETLISKL
ddx26b	NM_001016198	7951	Xenopus (Silurana) tropicalis DEAD/H (Asp-Glu-Ala-Asp/His) box polypeptide 26B (ddx26b), mRNA	1	957	1146	yes	3	215	2903	MGLLIHSDLLICLLRKHGIPAISLYMCDQIQKLVFLLDIGQFLSLSGLIRTLQHYHLVQLTQW
fhl1	NM_001006702	7956	Xenopus (Silurana) tropicalis four and a half LIM domains 1 (fhl1), mRNA	1	657	1053	yes	3	65	953	MATALCVRPAIRSLLGSVSLQWRIITIVWIATNPLWLRSVLDVTTLSQGLEKDPMLSTMKEIPGTNIVSLARSALLTWLTSALCAIMSKFTVKTVPKKCKWPLGSAQMILFALVVTKFKAYYTLHNFNVTVL
fhl1	NM_001006702	7957	Xenopus (Silurana) tropicalis four and a half LIM domains 1 (fhl1), mRNA	1	297	564	no	3	65	953	MITASAVLNAIILWPMSNSLLKTIKSCVPSAPRGRTPCAAVAATSRSNQEAAMWNTREVPGMKNALPAVTASRPLGQEASFLREPMSTV
htatsf1	XM_002932593	7969	PREDICTED: Xenopus (Silurana) tropicalis HIV-1 Tat specific factor 1 (htatsf1), mRNA	3	872	1010	no	2	217	1573	MQSFNSKESMMPLKRRRNAKTTKRRYLYSKNNWIGGQKRKQMIHQE
rbmx	XM_002932626	7986	PREDICTED: Xenopus (Silurana) tropicalis RNA binding motif protein, X-linked (rbmx), mRNA	2	313	1108	yes	1	0	936	MAMVHHPAETQYHLDEMFICPLGMMATVEKIDMMDIQAEIMEVPGTLEIMVHHQGITLTETMVIQVLVMTMDPEVTVIVMVMVAVTVGIIQIIQVEVLTETLMRAMVTHVVLHLQEGPRHHMVEAVDMMITAALGMDMEGETVTQAAEMISTQVGVIELADKSEGYHPQWIGDTHLHVILTAVQAVVGPEVEAAVAADQTEEVVEADIKPLIWTKDVTKKKIRRKWLFCLYHQRTTLRKFVFYLSLNFFTCKFSPPWNSGSCGKV
LOC100489507	XM_002932627	7995	PREDICTED: Xenopus (Silurana) tropicalis transmembrane 9 superfamily member 2-like (LOC100489507), mRNA	2	187	379	no	1	0	1947	MNMMRLTFVRMRKKGDPLKILDKFFLERELSHHHTSLHLIRIRHARQFVTNSTNPKLILTFWNS
mcf2	XM_002932628	8016	PREDICTED: Xenopus (Silurana) tropicalis proto-oncogene DBL-like (LOC100489667), mRNA	2	1729	1975	no	1	0	2592	MNFIIKYFSRVLKVALKPQKRLDFASLKGGRISRCMRSTARISHGQIPFGDSFLTVYFFRNAKKSWTINLHLILICLNQFSV
LOC100498460	XM_002932597	8028	PREDICTED: Xenopus (Silurana) tropicalis glucocorticoid receptor DNA-binding factor 1-like (LOC100498460), mRNA	2	274	466	no	1	0	4410	MWWSRQNLLMIRHSSLTVVLPYSLTSSVLPPVSWPLLKNLCTSAQISWAWNRTLSRSRCLRVNC
slc1a5	NM_001008126	8039	Xenopus (Silurana) tropicalis solute carrier family 1 (neutral amino acid transporter), member 5 (slc1a5), mRNA	2	982	1177	no	1	183	1764	MPHLVSCSLWQARLWRWKMLSSFSPVWGNTYLAALLGISYMDCWYFHSSILPLLGRTHTASCGEL
fbxo46	NM_001113005	8069	Xenopus (Silurana) tropicalis F-box protein 46 (fbxo46), mRNA	1	1347	1695	yes	3	401	1637	MGCDHVIHVGVVTPSIAMTPANSAKGYIGGEMCHCAGGTQSLTIMICPMDDHIGCVVDGQTEQLLAASWDYMTIIGCYQERAVEGEEEEMGKGKKAGEKLKGLTVVYESLNKRHYL
ckm	NM_204043	8122	Xenopus (Silurana) tropicalis creatine kinase, muscle (ckm), mRNA	2	604	724	no	1	39	1182	MTTSCLTNQCPLCFWPLAWAVTGLMPVVSGTMKTRPSWCG
ckm	NM_204043	8123	Xenopus (Silurana) tropicalis creatine kinase, muscle (ckm), mRNA	2	271	418	no	1	39	1182	MRNPMRCSRTFLIPLLRIVTVVTSQLTNTRQTSTLPTLREVMTLTQTMC
LOC100491038	XM_002932636	8127	PREDICTED: Xenopus (Silurana) tropicalis MAP/microtubule affinity-regulating kinase 4-like (LOC100491038), mRNA	2	586	766	no	1	0	1986	MSLLQVGNWTLSAVAPLTLPLSSFREKGTMDLRWMSGAWELSYTHWSVDPCHLMGRILRN
sympk	NM_203928	8144	Xenopus (Silurana) tropicalis symplekin (sympk), mRNA	2	1102	1408	yes	1	204	3681	MVKGDKRRAALTFHCLMTMMIKTQYSFPPFLLLHQARSRLQTSQLNSCAHCFPQRMWQTWCSSVWCIYRIPCLPPSRPLTLQLSQLGLTPRFAILLDSWLHK
sympk	NM_203928	8145	Xenopus (Silurana) tropicalis symplekin (sympk), mRNA	2	2026	2149	yes	1	204	3681	MGSSQKLSLKLLCSQTLPWMYCGNTARMRGAVIWVCPPCGI
LOC100491880	XM_002932640	8162	PREDICTED: Xenopus (Silurana) tropicalis cleft lip and palate transmembrane protein 1 homolog (LOC100491880), mRNA	3	1412	1640	no	2	4	1765	MLSHLQRSMMIWPLGTCHGSCTHYWRAMRCTAYCIWNIRAGIPGYSVCCMDFCSHLMWCSLYICTSVGSTGWIPQD
gnb2l1	NM_001004946	8238	Xenopus (Silurana) tropicalis guanine nucleotide binding protein (G protein), beta polypeptide 2-like 1 (gnb2l1), mRNA	2	211	373	no	1	69	1020	MKQTMGFHNVLSGVTPTLSVMWLSLQMGSSLSQDPGMEHSDCGILQLAPPHAGL
bnip3	NM_001015859	8265	Xenopus (Silurana) tropicalis BCL2/adenovirus E1B 19kDa interacting protein 3 (bnip3), nuclear gene encoding mitochondrial protein, mRNA	2	226	436	yes	1	84	690	MATWKKFSWTPSTNRAEAAPGRAHTVTAHLALRPQVSRDAVKVILQGARRRAALSQKKITLSGGKSWKTY
ebf3	XM_002932648	8283	PREDICTED: Xenopus (Silurana) tropicalis early B-cell factor 3, transcript variant 1 (ebf3), mRNA	1	696	858	no	2	118	1816	MQSELPEKCREPKGYAKISGCCINNSQCGRPCPGCLRQHVCAQQFQTWEAGAPS
ebf3	XM_002932648	8284	PREDICTED: Xenopus (Silurana) tropicalis early B-cell factor 3, transcript variant 1 (ebf3), mRNA	3	719	899	no	2	118	1816	MQGTQGICEDFRLLYQQQSMWTAMSWLSQTTCLCTTIPNMGGGRAVLTPQKVRPLLIWKM
ebf3	XM_002932649	8286	PREDICTED: Xenopus (Silurana) tropicalis early B-cell factor 3, transcript variant 2 (ebf3), mRNA	1	696	858	no	2	118	1771	MQSELPEKCREPKGYAKISGCCINNSQCGRPCPGCLRQHVCAQQFQTWEAGAPS
ebf3	XM_002932649	8287	PREDICTED: Xenopus (Silurana) tropicalis early B-cell factor 3, transcript variant 2 (ebf3), mRNA	3	719	884	no	2	118	1771	MQGTQGICEDFRLLYQQQSMWTAMSWLSQTTCLCTTIPNMGGGRAVLTPQKLPPA
LOC100497631	XM_002932661	8296	PREDICTED: Xenopus (Silurana) tropicalis receptor-type tyrosine-protein phosphatase epsilon-like (LOC100497631), mRNA	2	1996	2131	no	1	0	2127	MFSRPLKVYGCKGHIWCKHWNNMNSAIKWYKTTLTYFPITPISSX
dock1	XM_002932662	8310	PREDICTED: Xenopus (Silurana) tropicalis dedicator of cytokinesis protein 1-like (LOC100497783), mRNA	2	4957	5161	no	1	0	5538	MGLFWNHFCQRKCILAPKINWTEMILIRRRRRKRRRKGTASTKRCLIKNLKLLKFHCSSLTPLFCQKR
txndc5	NM_203855	8389	Xenopus (Silurana) tropicalis thioredoxin domain containing 5 (txndc5), mRNA	2	130	376	no	1	51	1266	MKTRIRRTSIRPICSIMPSSKSRTSSCSSLPGAVIASVCSPLGMSLGTNTTVCQRLQRTLPRLTVLRICPHALSMASEDTPR
txndc5	NM_203855	8392	Xenopus (Silurana) tropicalis thioredoxin domain containing 5 (txndc5), mRNA	2	544	826	no	1	51	1266	MSLLQPTLRSISQKETILSNSLHLGVDTVKLWLLHGNSSQQPSRTLIVLKSPRLIALNIMGCALITKCVDILHCCGSGMGKRLTSIREREIWIL
riok1	XM_002932675	8433	PREDICTED: Xenopus (Silurana) tropicalis RIO kinase 1 (riok1), mRNA	2	859	1033	no	1	0	1620	MQGLYMLISVSLTCSITMERCISSMYLNQLNTIILMPWSSFERIVLILMISLSNMALQ
rreb1	XM_002932676	8451	PREDICTED: Xenopus (Silurana) tropicalis ras responsive element binding protein 1 (rreb1), mRNA	3	755	974	yes	2	385	5425	MVGACRTLNPQRNLQLQTGLAEGIRNQKRKNHLISVPCVKRSAILSINLQCISASIILTQEGLTIAAVSAESL
jarid2	XM_002932688	8457	PREDICTED: Xenopus (Silurana) tropicalis jumonji, AT rich interactive domain 2 (jarid2), mRNA	2	2302	2440	no	1	555	4230	MMRCDLLHRFNTSTSLGDVGVQMYSAWPALRSTSNLRASPWMNSRS
mylip	NM_001017059	8469	Xenopus (Silurana) tropicalis myosin regulatory light chain interacting protein (mylip), mRNA	2	1057	1225	no	1	153	1488	MITSTLEKSMYLTLEGLQKRCTTMQGEPCTMPALWIWSLGVAIVSQVPRSRHLKVI
kdm1b	XM_002932678	8476	PREDICTED: Xenopus (Silurana) tropicalis lysine-specific histone demethylase 1B-like (LOC100489838), mRNA	2	352	703	no	1	246	2709	MKAWRKMKIIQKKNTENVKKQAALQHAQFVLPVQPKDVLKMVTHQDGIIFLVVSIFAMNALTIIIEVTKMGMIYTHHGSEFGQVMAKVNPALKHTWQTSNFHIGSSAPNWNVENGDS
LOC100490129	XM_002932679	8484	PREDICTED: Xenopus (Silurana) tropicalis kinesin-like protein KIF13A-like (LOC100490129), mRNA	2	127	337	no	1	0	5895	MPSKERAENHQRCLPLTTASGPWMNQTHLNMQVKKQCLSALEKEFLTMLFRDTTLAFLHMDKQVQENLSP
LOC100490411	XM_002932680	8501	PREDICTED: Xenopus (Silurana) tropicalis adenylyl cyclase-associated protein 2-like (LOC100490411), mRNA	3	941	1289	no	2	163	1612	MIFPKIALHCLPSLIREKLLQKGSDTFQMNRRLIKTLNCGAKEDQVYHLQRVTPQAQLHLNLLHISLILLCSNWKERNGEWNTRREYKALLFLKLNSSKWHTFLNARKQQYKLKEN
rbm24	NM_203685	8505	Xenopus (Silurana) tropicalis RNA binding motif protein 24 (rbm24), mRNA	2	1288	1477	yes	2	217	895	MGSRNVHIFSMHFFFFFSLLKCSWSQNGHGSTWPAGHRMDRHQSNLLVYPLHEWNYMEQVMWN
atp6v1b2	NM_001078714	8593	Xenopus (Silurana) tropicalis ATPase, H+ transporting, lysosomal 56/58kDa, V1 subunit B2 (atp6v1b2), mRNA	1	1341	1476	no	3	23	1538	MIFCTWSSYTNLKRILLRKVLMTTAQFTKRWILDGSFFESSPKSC
gfra2	NM_001113052	8609	Xenopus (Silurana) tropicalis GDNF family receptor alpha 2 (gfra2), mRNA	3	266	437	no	2	154	1516	MPMSCVPQTSPAAQGIEHYASVWLGETAMLCCPVRNARMPWRCFRRAPSICVAAAEA
znf180	NM_001079065	8785	Xenopus (Silurana) tropicalis zinc finger protein 180 (znf180), mRNA	2	1147	1363	no	1	156	1656	MAALNAARASQKAQLFLNTREPIQGRNHMRALSVQRALWTSPPSQITREHTLGRDLIHAGTVGKVSLTVQPL
znf180	NM_001079065	8786	Xenopus (Silurana) tropicalis zinc finger protein 180 (znf180), mRNA	3	992	1157	no	1	156	1656	MWQRLCAEFKSFNSLENSYRGEAIFLCSVWEELYPQVTCDTASAHTHWGGSLWLH
LOC100489897	XM_002932711	8789	PREDICTED: Xenopus (Silurana) tropicalis zinc finger protein 135-like (LOC100489897), mRNA	3	971	1148	no	2	55	1708	MHAKSVGKHIHVIHILLYTRELTPGNGPLSAGNAARVLQTVRHSSYTSECTQERNHLYA
vps41	XM_002932710	8791	PREDICTED: Xenopus (Silurana) tropicalis vacuolar protein sorting-associated protein 41 homolog (LOC100489726), mRNA	2	1726	1930	no	1	0	2535	MSYRIDRNCSMCTCTNCSKETIIKAGSTTRSKSACMQNLIDQTFCLFLETAHIVHWRRLLKSVTREIL
LOC496795	NM_001011332	8795	Xenopus (Silurana) tropicalis hypothetical LOC496795 (LOC496795), mRNA	3	548	704	yes	2	256	1804	MVTKEIDGIPVWNAGKPLFRVLTSSPTRKLIQERSRTPAMNVGPDLPKSQLS
LOC496795	NM_001011332	8796	Xenopus (Silurana) tropicalis hypothetical LOC496795 (LOC496795), mRNA	3	935	1118	no	2	256	1804	MPLATESLVKERKFINVLSAIKDLLEAQTWWSTTGHTRGRNHTSAPTVAKPLQTGRTLSAT
fgfr1	NM_001015894	8807	Xenopus (Silurana) tropicalis fibroblast growth factor receptor 1 (fgfr1), mRNA	3	2096	2300	no	2	421	2863	MLPRGTLESTCEPGAPRAWSTATTLPVPPISCSPSRIWCRVLTRWRVGWSTLPLKSVSTETWLQGMSW
ddhd2	XM_002932713	8825	PREDICTED: Xenopus (Silurana) tropicalis phospholipase DDHD2-like (LOC100490413), mRNA	2	544	685	no	1	102	2235	MSGRRGWNPHSGTLLFYTTPSLWSIISQWESRMSGEPHPVSKVGPEQ
LOC100486885	XM_002932772	8863	PREDICTED: Xenopus (Silurana) tropicalis olfactory receptor 1-like (LOC100486885), mRNA	2	286	409	no	1	0	948	MVAWHSYFFIYLALTVTFSCWPLWPMTDMWLFVSLCVITSL
adam9	XM_002932718	8894	PREDICTED: Xenopus (Silurana) tropicalis disintegrin and metalloproteinase domain-containing protein 9-like (LOC100491265), mRNA	2	1765	1960	no	1	366	2955	MNVTSQSTAMAPPLSASQMSTSRMGTRARTVKPTATMACVSIMMPSARLSLDQRPNPLLQFATKK
plekha2	NM_001130261	8907	Xenopus (Silurana) tropicalis pleckstrin homology domain containing, family A (phosphoinositide binding specific) member 2 (plekha2), mRNA	3	482	602	no	2	430	1657	MKAVGAFYEDILSWTLRRITFCGTWIILRTCPMEQEQLDV
ash2l	XM_002932723	8929	PREDICTED: Xenopus (Silurana) tropicalis set1/Ash2 histone methyltransferase complex subunit ASH2-like, transcript variant 2 (LOC100492052), mRNA	2	742	1066	no	1	6	1779	MGLQLPAALLKGEEPNASSKMGDQPALPKEHEVIHCFQPSAFPHMAILWSTRLTKMATDTSWQSPTLTLLTQRSWSWTAGQGSPSLGTCTELASMKEYFLLCMTVLRS
ash2l	XM_002932723	8931	PREDICTED: Xenopus (Silurana) tropicalis set1/Ash2 histone methyltransferase complex subunit ASH2-like, transcript variant 2 (LOC100492052), mRNA	2	1249	1480	no	1	6	1779	MTSSATLGEARKGLGSTSQLESTIPSPTDRGIPWGSIFASQTSQRQHRLCQTPTKTRYNAAFTFIGYLLPCAVSFKF
ash2l	XM_002932722	8937	PREDICTED: Xenopus (Silurana) tropicalis set1/Ash2 histone methyltransferase complex subunit ASH2-like, transcript variant 1 (LOC100492052), mRNA	2	1249	1525	no	1	6	1683	MTSSATLGEARKGLGSTSQLESTIPSPTDRGIPWGSIFASQTSQRQHRLCQTPTKTRLYSTKMVLTKAWPIKICSRECITLPYPCTRAAQYQ
ash2l	XM_002932722	8939	PREDICTED: Xenopus (Silurana) tropicalis set1/Ash2 histone methyltransferase complex subunit ASH2-like, transcript variant 1 (LOC100492052), mRNA	2	742	1066	no	1	6	1683	MGLQLPAALLKGEEPNASSKMGDQPALPKEHEVIHCFQPSAFPHMAILWSTRLTKMATDTSWQSPTLTLLTQRSWSWTAGQGSPSLGTCTELASMKEYFLLCMTVLRS
LOC100489727	XM_002932789	8978	PREDICTED: Xenopus (Silurana) tropicalis biotinidase-like (LOC100489727), mRNA	2	223	433	no	1	36	1557	MKYKWPPQQKGEPRSLCFLRMEFMDLTILGSPFTHIWIFFPLLTCFLGIHAKSLTDLVIQRCSRGLAAWQ
rftn1	NM_001113084	8997	Xenopus (Silurana) tropicalis raftlin, lipid raft linker 1 (rftn1), mRNA	3	1568	1745	yes	1	408	2241	MDHITRFRSAHRLHATLEFFGCLWMAADMCHFNSYSKNQQGWECHYQADCIPAETSPSP
kdm6a	NM_001130335	9000	Xenopus (Silurana) tropicalis lysine (K)-specific demethylase 6A (kdm6a), mRNA	1	1737	1920	no	3	602	4811	MQQGAKIVTIPLHLQQGSNTYRLSCVTFHKVVYRIKLNCFLVLRRHGAYQSPQSLPPGRVP
kdm6a	NM_001130335	9002	Xenopus (Silurana) tropicalis lysine (K)-specific demethylase 6A (kdm6a), mRNA	1	993	1131	no	3	602	4811	MLPFFMALVWSTSITMHFTGQLEHFRKCFTSNPASVAPRKFIYDLD
kdm6a	NM_001130335	9004	Xenopus (Silurana) tropicalis lysine (K)-specific demethylase 6A (kdm6a), mRNA	1	4269	4479	no	3	602	4811	MLAQCIGFKQLVGVTTLHGMLALSQPSSINWQWNGTNGINCSASSLLYQWFISLGIWQRISKFQIQSFLK
cask	NM_001016204	9023	Xenopus (Silurana) tropicalis calcium/calmodulin-dependent serine protein kinase (MAGUK family) (cask), mRNA	1	1266	1389	no	3	125	2885	MTKLTQSHHHKSGILQVMLYSEPKRCWKKYHAILKIMMQRS
cask	NM_001016204	9025	Xenopus (Silurana) tropicalis calcium/calmodulin-dependent serine protein kinase (MAGUK family) (cask), mRNA	1	1974	2274	no	3	125	2885	MIQQKMTSFLVKKLASDLELETLSKLLVRMTTTGGRANWKTLKMALLVSFPLLNFKSGVLLALLWRKQNRSSRPAVPGLARRKSSTKINTWQSTMQSLTN
cask	NM_001016204	9026	Xenopus (Silurana) tropicalis calcium/calmodulin-dependent serine protein kinase (MAGUK family) (cask), mRNA	1	2712	2901	no	3	125	2885	MSLFSACRRNRKFSREHTHTTSILRLSTMRLTKRLGTWRTPSSLCAQHRNGFPYPGSIRPLSR
ddx3x	NM_203865	9037	Xenopus (Silurana) tropicalis DEAD (Asp-Glu-Ala-Asp) box polypeptide 3, X-linked (ddx3x), mRNA	3	458	776	no	2	232	2329	MVMIEVAMEIVVLDELTEAFMIERILGGIQAETKMHIAVLAPVVSEENQAYLMIEEEVDPEDRMTVDQTAMMEWLTEVIEVALVDLTEATAVGQMKEMMRMTGQNL
usp9x	NM_001130249	9046	Xenopus (Silurana) tropicalis ubiquitin specific peptidase 9, X-linked (usp9x), mRNA	3	380	560	no	2	343	1168	MKARARHLMDSLNLHFSRIRLLHLILPMKIPQSALQVSRGRMGKLHLSLKMRSLLFLILT
med14	XM_002932793	9051	PREDICTED: Xenopus (Silurana) tropicalis mediator complex subunit 14 (med14), mRNA	3	3170	3371	yes	2	766	5092	MDPQREARSAFSGILSTVSFTFHLAQLDLIQGAATVTISFFISCRKCSTKSQMWCSYCRYYMTPKLH
clcn4	NM_001126598	9085	Xenopus (Silurana) tropicalis chloride channel 4 (clcn4), mRNA	3	1007	1196	no	2	49	2329	MLNIILLGTWLNFFHSSSLVSSGVCGEHFLFAVILLGAGGVKPLSLGNTQCWKLLWSLQSQLY
wwc3	XM_002932795	9090	PREDICTED: Xenopus (Silurana) tropicalis WWC family member 3 (wwc3), mRNA	3	857	1055	no	2	421	4021	MPRRRFTKLSSSVLNWHKKSFNSCMISVKMTVVLMSAPFLDSQQTQSMIRTKLRLKLQTGETGFPG
wwc3	XM_002932795	9091	PREDICTED: Xenopus (Silurana) tropicalis WWC family member 3 (wwc3), mRNA	3	3497	3692	no	2	421	4021	MSADFIEVTVIVLHCQENHLSSEIHWKGELYAISSPASLPWQRSWLGHLLTWSWISRLPEPGSGN
kcnd3	NM_001102941	9119	Xenopus (Silurana) tropicalis potassium voltage-gated channel, Shal-related subfamily, member 3 (kcnd3), mRNA	1	1701	1935	no	3	179	2138	MNLWMSRCLNRTAGRAPCKTTHLVAAHPYPVTMGSPPPAVPDATKRPPTSLTPMCRQQGCAACRNSALFTYSAVTNHL
arid2	XM_002932805	9158	PREDICTED: Xenopus (Silurana) tropicalis AT-rich interactive domain-containing protein 2-like (LOC100486517), mRNA	2	1060	1330	no	1	762	6207	MKRCIILEKMMMKFSLEIQNNNSQLVQYRVHTITSSIVYQIIYGRVMALLWTLIHQTITINWCSRFYLDSQMKWTLQSTCVRFCPMKASM
arid2	XM_002932805	9162	PREDICTED: Xenopus (Silurana) tropicalis AT-rich interactive domain-containing protein 2-like (LOC100486517), mRNA	2	1492	1624	no	1	762	6207	MKYVTSYMIKVHLKVPHQNPCGKLYFTHLENWALMTLKGSEFSR
arid2	XM_002932805	9164	PREDICTED: Xenopus (Silurana) tropicalis AT-rich interactive domain-containing protein 2-like (LOC100486517), mRNA	2	5668	5803	no	1	762	6207	MLQQNMEVKMCILGSVCGKVVNPFSGRGFLSSPTYRTSTAREMLY
nell2	NM_001097285	9180	Xenopus (Silurana) tropicalis NEL-like 2 (nell2), mRNA	1	1866	1989	no	3	623	3065	MTKLFAFVVMVFGPFEKIVPTVKILMSALKAVITVGKIQCV
nell2	NM_001097285	9181	Xenopus (Silurana) tropicalis NEL-like 2 (nell2), mRNA	1	2427	2580	no	3	623	3065	MNVLREGTAAVMTLCASIWMVDLIVAVHMEKTVLVTAHMKERLSTMGRFGC
nell2	NM_001097285	9183	Xenopus (Silurana) tropicalis NEL-like 2 (nell2), mRNA	1	2043	2223	no	3	623	3065	MITLAQNTMSVQPTSTAVMKMQCVITQWEDITVSASLDIQEMALSARLSVRMAAEMEAPA
LOC100489781	XM_002932822	9204	PREDICTED: Xenopus (Silurana) tropicalis A disintegrin and metalloproteinase with thrombospondin motifs 20-like (LOC100489781), mRNA	2	3505	3646	no	1	0	5697	MRLVELLKNHFAPIFHDLLKLNHVLLLVENGNQETGHLALLLVEKES
LOC100489781	XM_002932822	9206	PREDICTED: Xenopus (Silurana) tropicalis A disintegrin and metalloproteinase with thrombospondin motifs 20-like (LOC100489781), mRNA	2	3964	4099	no	1	0	5697	MKRGEVAVFVMKPLNLLNQGTVTLDLVLSGAMEPGENAHKHVAVE
LOC100489781	XM_002932822	9208	PREDICTED: Xenopus (Silurana) tropicalis A disintegrin and metalloproteinase with thrombospondin motifs 20-like (LOC100489781), mRNA	2	1645	1777	no	1	0	5697	MVNGDHGDLIVHVQESVAVGLKLLLETAISLSQEMEGNIVWGEE
prickle1	NM_001016939	9215	Xenopus (Silurana) tropicalis prickle homolog 1 (prickle1), mRNA	2	1651	1801	yes	1	225	2724	MDLEILHMVAILVLLAAESYKNWIWIMELQVTCMRRCHGINVHWNVCRII
prickle1	NM_001016939	9217	Xenopus (Silurana) tropicalis prickle homolog 1 (prickle1), mRNA	2	2278	2761	no	1	225	2724	MHFILLQKASHPGEKEILVFTLQRIMRNFFIIDLLMRSRRIFKMLTSLDNTQMLLLILDCPAKLWINSLGYMVKMKILGAQPVPHPLLILKRRAIFLASLFPSPCHRDISIFPMTCVVQQMHYPVLSLVKGPLNPRRKRGTKAKTALFPKTFCLSDHSQSF
prickle1	NM_001016939	9218	Xenopus (Silurana) tropicalis prickle homolog 1 (prickle1), mRNA	2	592	814	no	1	225	2724	MLCVKSAERRLMEVKLQFLFQELARGCAGTHHALFVPHVMSYLLISSTSTKMEKYTVEGTMLNYLSQDARLVTR
prickle1	NM_001016939	9219	Xenopus (Silurana) tropicalis prickle homolog 1 (prickle1), mRNA	2	1027	1291	yes	1	225	2724	MGNTGMLQRPVFLVPSVKFHYWVALSYPKRGGFIVPKLAVWERMCMHRTHLTLPFSLQDQENLEEVYEWARVAGLLISADNLCYYLLL
pdzrn4	XM_002932810	9241	PREDICTED: Xenopus (Silurana) tropicalis PDZ domain-containing RING finger protein 4-like (LOC100487445), mRNA	2	349	739	no	1	0	2322	MNFMKVMSISLACLLMGTEQKTLSMRRLSCAVLTVRIDWALPSAIEQMMKKILESMSVRLIQMVLQQEMGVSEKETEFYKLMAKISRTERRLWHYSPVMNARESLCWLRDQSYSWMKGGWMMKGMNSWRS
LOC100487602	XM_002932811	9244	PREDICTED: Xenopus (Silurana) tropicalis contactin-1-like (LOC100487602), mRNA	1	594	837	no	3	119	3134	MNFLCSFHLIIEDLLHKQMEIYTLQKWSNQTEAITHVLSPALLLPKVYSANLFHYFHKLTLQRNLNVIHLLLMSNLKTLVP
nrcam	NM_001142182	9256	Xenopus (Silurana) tropicalis neuronal cell adhesion molecule (nrcam), mRNA	3	584	785	no	2	271	4153	MAQEWKHMRVNISVLPGMIEVLRYPTTLLFASPDPLCGQRKKLNQLLFSRVFLWCSHATHQKGYHHL
dnajb9	NM_001122724	9272	Xenopus (Silurana) tropicalis DnaJ (Hsp40) homolog, subfamily B, member 9 (dnajb9), mRNA	2	328	670	no	1	108	771	MRRFQMKVNGRSMISSAMMPLQMLEKEAVTNISTNILTSTLMIYLKTLTFLVKPKVVDRKGTFKTISEAIKRLIIDIDGTLRTFRLEEDCLMTCLRIWKKCLHSVVSMGLVEIL
ifrd1	NM_001016124	9291	Xenopus (Silurana) tropicalis interferon-related developmental regulator 1 (ifrd1), mRNA	2	4	139	no	1	237	1518	MYRLHSQAFTGVSVTSTFRHFFPIPIEDSKLIPERRFSKKCSSIG
LOC100488241	XM_002932815	9297	PREDICTED: Xenopus (Silurana) tropicalis transmembrane protein 168-like (LOC100488241), mRNA	3	143	326	no	1	0	2097	MYGPVCQMGANSRYIDTSNIYIGPLHPWNCKHSTLLFFNGSSQFEPFQSLVWISSWTSLLY
gpr85	NM_001078822	9301	Xenopus (Silurana) tropicalis G protein-coupled receptor 85 (gpr85), mRNA	2	790	1078	no	3	533	1643	MDLRGSYLQSDCISWGVVLLSHCFHALLHKCDQILSYSSPSILYKKIDFLDLFGSYLYGLDLICSYGLSTSPRCWYLFFHKGGRPVHVSASFLQGQ
ppp1r3a	XM_002932816	9304	PREDICTED: Xenopus (Silurana) tropicalis protein phosphatase 1, regulatory (inhibitor) subunit 3A (ppp1r3a), mRNA	1	549	717	no	3	5	3233	MVILISLLSQLLWCLLIRKRVPQCSSAFAMKHLLVPFGITMMGKITHSSAIRKNVL
foxp2	NM_001100252	9309	Xenopus (Silurana) tropicalis forkhead box P2 (foxp2), mRNA	2	2359	2533	no	1	486	2700	MHPLAYCKQCTKTSTVHWITLTAMETAVLAAHHSHTYHSSSLSLLLTKGSFQSPVIPL
foxp2	NM_001100252	9311	Xenopus (Silurana) tropicalis forkhead box P2 (foxp2), mRNA	2	1876	2002	no	1	486	2700	MLEPFEDGTLTNTTFPCQQKLPRTMSFIRMQMSGLHSLMQPS
bub1b	NM_001103014	9320	Xenopus (Silurana) tropicalis budding uninhibited by benzimidazoles 1 homolog beta (bub1b), mRNA	1	228	567	no	3	41	1274	MSGTGTSSGLSRHSLKEGKRATCAHCWKELLRYSMKNRDIMMICAILAFVSSLLISAQSLWICTAICTAKELGSLMPYFISLGPNSLKLEVISRKLTPYFSRACNTRLNHWKS
sec23a	NM_001079191	9341	Xenopus (Silurana) tropicalis Sec23 homolog A (sec23a), mRNA	1	558	744	no	3	32	2327	MNWDVKASRRAMFLEEIKTLLESKSRKCYLLQNLQQPNKAVGHKFNNPLHPTDFYNQCRTST
sec23a	NM_001079191	9342	Xenopus (Silurana) tropicalis Sec23 homolog A (sec23a), mRNA	1	198	342	no	3	32	2327	MNLFCAAGLHAELYSILYVKWIIEQNFGHATSVTNEISFPLHMQASQK
sec23a	NM_001079191	9343	Xenopus (Silurana) tropicalis Sec23 homolog A (sec23a), mRNA	1	1545	1782	no	3	32	2327	MLRHRSKTLQLHLIKRQQLYLWLGLLCTGQRQRKVLMSCDGWTGSSFDCVKSLENTTKMTPSLSNFLRLSLSTHSLCST
sec23a	NM_001079191	9346	Xenopus (Silurana) tropicalis Sec23 homolog A (sec23a), mRNA	1	2160	2298	yes	3	32	2327	MEEVRLASCYLKSTRPRLITTCTAGGRNPELPFSPMMSACRFLWII
vps39	NM_001142157	9368	Xenopus (Silurana) tropicalis vacuolar protein sorting 39 homolog (vps39), mRNA	3	1262	1460	no	2	505	2497	MWKSGHLNHGCWYKALSYKDLVLLHLEDPILYMWPAITLSGGWFQCPLPHRYSSCYRTSSLNSHCS
vps39	NM_001142157	9369	Xenopus (Silurana) tropicalis vacuolar protein sorting 39 homolog (vps39), mRNA	3	1475	1697	no	2	505	2497	MTQMERSYSKSITSRICMLLIYFARNVLKNPCRVLPSLEQILPTLSECTRICYLLITGSSFSTLTLFLPYLEQS
hectd1	NM_001137613	9427	Xenopus (Silurana) tropicalis HECT domain containing 1 (hectd1), mRNA	2	2185	2341	no	1	180	7779	MSHRKMPRSCNRAGPTIGGTGLLFAVGTVCTSGVMLQLWSSLMVAMAGSALS
prkd1	NM_001127412	9453	Xenopus (Silurana) tropicalis protein kinase D1 (prkd1), mRNA	2	388	607	no	1	198	2778	MTRSSCFGMIQTPKTSCSWLSLRLIFRRGTSLKWCFQPQPHSKISRSAPMHCLSILTERRHSVTIAERCFGVW
nova1	NM_001102869	9466	Xenopus (Silurana) tropicalis neuro-oncological ventral antigen 1 (nova1), mRNA	1	537	705	no	3	209	1733	MPSMGSSQRKYERCHKMWPRLSPSASCSRKPQSTLTESNRHCHHYHQPPSPLHLTP
LOC100496736	XM_002932834	9472	PREDICTED: Xenopus (Silurana) tropicalis gap junction delta-2 protein-like (LOC100496736), mRNA	2	610	763	no	1	0	912	MGLMSRPCTNVTDILASKRWSVMCLGQLRRRYSWFLCLRLVASVLCSIWQS
LOC100496736	XM_002932834	9473	PREDICTED: Xenopus (Silurana) tropicalis gap junction delta-2 protein-like (LOC100496736), mRNA	3	8	137	yes	1	0	912	MDYLRKTFGGCCAAAQYYDRKDSADSGCHLPDTYCGHCWRDCL
actc1	NM_203763	9476	Xenopus (Silurana) tropicalis actin, alpha, cardiac muscle 1 (actc1), mRNA	2	454	625	no	1	51	1182	MLPSRLCCPCTLLVVPQVSFLTPVMVSPTMSPSMKVMPCPMPSCVWTWLVETSQITS
actc1	NM_203763	9477	Xenopus (Silurana) tropicalis actin, alpha, cardiac muscle 1 (actc1), mRNA	2	709	904	no	1	51	1182	MWLWTLRMKWPPLPLPPPWRRAMSFPTVRSSPLEMNVSAALRPSSSLPSLVWNLLVSMKLPTTAS
meis2	NM_001097218	9500	Xenopus (Silurana) tropicalis Meis homeobox 2 (meis2), mRNA	3	1412	1670	no	2	268	1372	MPGDCLSQGGPMGICLVQPAHISPQLASASSSRHGPPVPSICQVTLSTAICIQRGSALPWMAMSAQAPNPSGPSPWHHILDKETHR
meis2	NM_001097218	9501	Xenopus (Silurana) tropicalis Meis homeobox 2 (meis2), mRNA	3	797	1046	no	2	268	1372	MKGTAAPNLTTKNSLGPPQTLLTIILPRGEIMMMLFPRILQVPRDLQVVVMLHKVETTVVNKGMTMTQTRTKRGKRNGAFSQK
spred1	NM_001008036	9507	Xenopus (Silurana) tropicalis sprouty-related, EVH1 domain containing 1 (spred1), mRNA	2	793	1240	no	1	135	1353	MQITGTQTSFGMTLIGRNQKMLHSLPRRTVKSPAISTPQPMAETLSRSKNQWRFARFSQHPLLKSPKGKKRMENIQAVYTARSDLTTRRMEGGSARMHQIPSRGASTRSAVCCAPRACSTTACQTLKEIIPTRALVTPLMKTCACAGWL
fmn1	NM_001129929	9534	Xenopus (Silurana) tropicalis formin 1 (fmn1), mRNA	1	3894	4035	no	3	341	4511	MLKAGIIKPAWWIMLYVIIYDILTRMLEQTKVFFHCQNPRTFYWLRR
myl9	NM_001102780	9614	Xenopus (Silurana) tropicalis myosin, light chain 9, regulatory (myl9), mRNA	3	389	575	no	2	88	604	MSSGTPLPALMRRRQDLSMKTTCESSSLRWETASQTRRWMRCIERPQLTRKATSTMWNLPVS
dlgap4	NM_001142152	9641	Xenopus (Silurana) tropicalis hypothetical protein LOC100216183 (LOC100216183), mRNA	2	454	718	no	1	219	3432	MNHQRTPHPTQPPMLPLLKSTGFLLASWTSLRNSCLFTRMASAPCSSSGGCQRARTEVRVLDVYATWSTLCRSFSTNLSPWKVEAGPV
srsf6	NM_001001248	9657	Xenopus (Silurana) tropicalis serine/arginine-rich splicing factor 6 (srsf6), transcript variant 1, mRNA	1	237	408	no	3	32	1736	MPGVHGETGMDTAMEVAVDTGTRDLAGTSMVPLCAQNSDLSWKTSPADAAGKISRIS
ptprt	XM_002932870	9685	PREDICTED: Xenopus (Silurana) tropicalis receptor-type tyrosine-protein phosphatase T-like (LOC100496210), mRNA	1	3306	3453	no	3	161	4232	MCLCMTPSWKPVCVVTRPSLSVSSALSITTSAEWTHRPTAAKSKMNSRP
ptprt	XM_002932870	9687	PREDICTED: Xenopus (Silurana) tropicalis receptor-type tyrosine-protein phosphatase T-like (LOC100496210), mRNA	1	3735	4044	no	3	161	4232	MRWTPLSSACSTGRRRPRAVMGLCKWSSSQRTSMRISSAEYSGSVTWPGRKMDTALYSTCSISAGRPTETPRLLSAPSSKWCSVWRSGKKSTMGGKAEQLCTA
ptprt	XM_002932870	9689	PREDICTED: Xenopus (Silurana) tropicalis receptor-type tyrosine-protein phosphatase T-like (LOC100496210), mRNA	1	2979	3255	no	3	161	4232	MSSERSLYRRKVPMISGRSVSSTSPAGRTMECLVMLLGSWASSGRSSSSTRQTLDPSLSTAVLELAGLAASLPLILCWIWQRTRVLWTYSTA
LOC100496521	XM_002932872	9733	PREDICTED: Xenopus (Silurana) tropicalis DNA topoisomerase 1-like (LOC100496521), mRNA	2	1354	1546	no	1	0	2550	MTARLHGWYHGQKTFRVPSNTSCSTLAPESRVRRTGRSTRLPEGSRCVLKRSAILTKRTGSPKR
ahcy	NM_001044429	9797	Xenopus (Silurana) tropicalis adenosylhomocysteinase (ahcy), mRNA	3	281	404	no	2	22	1321	MLLQPLPRLESPYTPGRVRRTRSTFGASIRPCTSKMANPST
chmp4b	NM_001004866	9806	Xenopus (Silurana) tropicalis chromatin modifying protein 4B (chmp4b), mRNA	3	320	443	no	2	103	769	MRSSWHRLMARCRPSNSRGKPWKMPTRIQKFSRTWALQLRQ
cbfa2t2	NM_001102826	9829	Xenopus (Silurana) tropicalis core-binding factor, runt domain, alpha subunit 2; translocated to, 2 (cbfa2t2), mRNA	3	1577	1793	no	2	106	1873	MSRKSPLRAAGTVAGKPVRRAVAVTSLATVAPSVSTRTGRNITASVAKAYTRRQSHLLLPVPSFPKPLTPSC
snta1	NM_001079216	9838	Xenopus (Silurana) tropicalis syntrophin, alpha 1 (dystrophin-associated protein A1, 59kDa, acidic component) (snta1), mRNA	3	866	1166	yes	2	43	1462	MESAICWPYSQRRISCCTTASRTPGRASASLLIVTHSLPPGWYTLGPQRALLSTTQSWHLLCVLVPRKGWRLICSAWRRRGNWQPGHGYWWTAATVQQNS
tox2	XM_002932882	9843	PREDICTED: Xenopus (Silurana) tropicalis TOX high mobility group box family member 2 (tox2), mRNA	3	704	1061	no	2	142	1669	MDPLPLRAANRLLPLLLAPPRKRRPNLIIRVRERNDLQTISVRNPRTRRKRRRKTPMSPRSPFLPTPCFLETPRQLLRDRIQMLLLATFPKLWRPCGIASAKSKSRPTRGRPRQPRRNI
chd6	XM_002932883	9850	PREDICTED: Xenopus (Silurana) tropicalis chromodomain-helicase-DNA-binding protein 6-like (LOC100498254), mRNA	1	2280	2400	no	3	251	7817	MSALMAESVVTSARRPLIDSVSQTRTALFSCCAQEPEAWA
chd6	XM_002932883	9853	PREDICTED: Xenopus (Silurana) tropicalis chromodomain-helicase-DNA-binding protein 6-like (LOC100498254), mRNA	1	3609	3738	no	3	251	7817	MWRYPWTGGTQKQINLSCLVFTNMDMRGTLPCVQILHFASWTR
LOC100485218	XM_002932887	9879	PREDICTED: Xenopus (Silurana) tropicalis zinc finger protein 436-like (LOC100485218), mRNA	2	310	796	no	1	39	1131	MAESTGLVMGLKNMCVWTAERFSHTVLRLLRIRGRTLVRNHMAAPTVGSVSHAAQRYPHTNGFTPESDHMGAQSVVSALFRAPTSSYTKGLTLVIDRMSVHSVASPSATVRTMSFTNGRTLASGPTPVWNVERVSAASPIWPRTRDFMPKTPSSSATNAAKA
rbm39	NM_001016788	9919	Xenopus (Silurana) tropicalis RNA binding motif protein 39 (rbm39), mRNA	2	391	667	no	1	309	1935	MKNAARREKKVKVGAAVVRRNAAGVRNVNAAKIGKEREVKAVKRNAAEAENGEKAVLEAENAGSEVATEALILDQSLVVALCVARWEEYLMV
LOC100486122	XM_002932893	9944	PREDICTED: Xenopus (Silurana) tropicalis myosin-7B-like (LOC100486122), mRNA	2	3913	4090	no	1	0	5688	MKKSRKPKENCRGLCPKQMRRWPSGGTNMKLMPFRGQKNWRKPRRNWLRAYRMLKRQWK
trappc4	NM_001142905	9974	Xenopus (Silurana) tropicalis trafficking protein particle complex 4 (trappc4), mRNA	1	231	426	no	3	17	674	MADIQQMGKKFWNILVTLLTIRCPFGLVDLGSLPMKSLCWLRCFTHCLLLDLSSPPSQEVLALRC
vps11	NM_001127407	9993	Xenopus (Silurana) tropicalis vacuolar protein sorting 11 homolog (vps11), mRNA	2	2296	2533	no	1	12	2754	MREQCISTERILHAFAERSKNSAPAPKFSRRQSAVYVAAVLSCHLCISCVVTPSTSTALRAMQKMMWTALPACLRTGKS
mll	XM_002932898	10003	PREDICTED: Xenopus (Silurana) tropicalis myeloid/lymphoid or mixed-lineage leukemia (trithorax homolog), transcript variant 1 (mll), mRNA	2	11284	11449	yes	1	0	11565	MERELVATCSVLMILKSSMPRCMETLLALSTTLVSPTATLESSLLMVRSTLSSLP
mll	XM_002932899	10023	PREDICTED: Xenopus (Silurana) tropicalis myeloid/lymphoid or mixed-lineage leukemia (trithorax homolog), transcript variant 2 (mll), mRNA	2	11239	11404	yes	1	0	11520	MERELVATCSVLMILKSSMPRCMETLLALSTTLVSPTATLESSLLMVRSTLSSLP
dscaml1	XM_002932905	10080	PREDICTED: Xenopus (Silurana) tropicalis Down syndrome cell adhesion molecule-like protein 1-like (LOC100491996), mRNA	2	271	841	no	1	81	6225	MTFMMCHTLGMYMPMAHFSCTLSPRPLSIALYMTMTISAQPRTPQARFGVRTFVSKQFSGNHIPFEWRISAPCGEAQLSLSASPLPLCRNMLVWCPGKRILCLSHQRVGLLPPLQVLCISWMYRRKMPCPHIAASQGIATAGRHDRAMVHGFLFQILPSLSLCCLMGFSHKKLLWGKPWNCLALHQDILT
dscaml1	XM_002932905	10082	PREDICTED: Xenopus (Silurana) tropicalis Down syndrome cell adhesion molecule-like protein 1-like (LOC100491996), mRNA	2	3268	3451	yes	1	81	6225	MELLFRRSIEPELVHPQLKLMLPLWKMFQVSPQRMSEFCQSLLMWQSSPGLSLLATLSMVY
bace1	NM_001079017	10094	Xenopus (Silurana) tropicalis beta-site APP-cleaving enzyme 1 (bace1), mRNA	1	867	1014	no	3	407	1913	MLLSQRTLLPSLIQTNSSSMDPTGRASWGLHMLKLQGRMTPLSHFLTPL
pcsk7	XM_002932907	10102	PREDICTED: Xenopus (Silurana) tropicalis proprotein convertase subtilisin/kexin type 7-like (LOC100492320), mRNA	2	598	853	no	1	0	2265	MTQTQCLTLMVAVTTVMGLAVLGKLLQFPITVFVQLVWPLAAGLQESVSWMDLLQTAWKLLHSTSTIRSMISIAAAGVLMMMVKQ
LOC100497477	XM_002932936	10185	PREDICTED: Xenopus (Silurana) tropicalis hypothetical protein LOC100497477 (LOC100497477), mRNA	2	2764	3034	no	1	0	4353	MKPSTTGSLLITWCMEKVSRHGSIHQLMLSDLMLISGFMHYPPGFMPVFYKQIRSLCFSLYEASLPSLVVFVNFTSTRLCAKNLDFMLVD
LOC100497477	XM_002932936	10187	PREDICTED: Xenopus (Silurana) tropicalis hypothetical protein LOC100497477 (LOC100497477), mRNA	3	3695	3851	no	1	0	4353	MLPLFVPTIPLRALYCIFKLASSRDSFALWPSVYLPFSSLVQRVPCAPRLIS
smad3	NM_001008436	10219	Xenopus (Silurana) tropicalis SMAD family member 3 (smad3), mRNA	1	504	633	no	3	290	1565	MEGSRCPIARVCPMSYTAAFGGGQIYTVTTNFEPWRCVNMPST
aagab	XM_002932941	10221	PREDICTED: Xenopus (Silurana) tropicalis alpha- and gamma-adaptin binding protein (aagab), mRNA	3	851	998	no	2	37	955	MNRENCTQKRLPKLSGWRLEETRMRLKVCHLRKRAKSHEPLLFPMRVEH
LOC100491438	XM_002932958	10237	PREDICTED: Xenopus (Silurana) tropicalis ladybird homeobox corepressor 1-like (LOC100491438), mRNA	3	725	980	no	2	301	2440	MWPMSAPGAAGEASSPPATTAPGPSASSAPTAASTSPPTSSSSTRTAPPTPSTRSPTPPTSTAGGGTSDSMTRPRLTICPTHGRT
LOC100488714	XM_002932944	10242	PREDICTED: Xenopus (Silurana) tropicalis e3 SUMO-protein ligase PIAS1-like (LOC100488714), mRNA	2	667	850	no	1	0	1944	MENHVTFQGIFHQLKMGLNQSDLVDQSILPHLYGFPQQSQTQLWCRGLQKLEGIFLWLFIW
LOC100489152	XM_002932946	10261	PREDICTED: Xenopus (Silurana) tropicalis integrin alpha-11-like (LOC100489152), mRNA	2	388	637	no	1	0	3564	MSAEVLIIPLGCAPESTPTSVSPGLLLLPYRGAPLSWTLLSCWTDLTASILGWRCKVFLSAFCRNSTSLQGKYRLVCCNTERP
coro2b	NM_001016965	10270	Xenopus (Silurana) tropicalis coronin, actin binding protein, 2B (coro2b), mRNA	2	454	586	yes	3	128	1553	MGNTRWWIKTEYVRGCPGVIWTQPESGADRMAPNSYQHSLQCWL
LOC100489303	XM_002932947	10275	PREDICTED: Xenopus (Silurana) tropicalis d-glucuronyl C5-epimerase-like (LOC100489303), mRNA	2	307	535	no	1	0	1821	MKSKLYDAEKRGRKCTCPSPGWRNTLRFMEKLLNMMALNDLSFPIATLKYMHNVDLIIQMGFLCRLKDIMWKSETG
adamts7	XM_002932960	10296	PREDICTED: Xenopus (Silurana) tropicalis A disintegrin and metalloproteinase with thrombospondin motifs 7-like (LOC100491770), mRNA	1	1116	1902	no	3	128	5423	MCLACANHIAAVTSMRILGYLLHSLSHMNWGTVLECSMMAVGMIVSPEERDLTSCLLNFFMILLPLPGPIAAEITSPASWTEDGGFVWMIPQVKSCWISLPCLLGCFTMLHISVAYSMGPLPASAGILIMCVTHCGAQWDQRATPNWMQLWMEQTVVTTSGALMGTVFQLGSVLLLWMDHGDPGVHGHRAPGVVELEYKMQRGIVLTLCPNMEAVTVWERERGSVYVIFCPALRILHLFDIYSAHVLTPFHTRGSSFSGHLF
rasgrf1	XM_002932963	10349	PREDICTED: Xenopus (Silurana) tropicalis ras-specific guanine nucleotide-releasing factor 1-like (LOC100492267), mRNA	2	367	730	no	1	0	3579	MNASSQHKLQPQMRMLTSKRLKRYRASCVAGCAAGSGRALSRITRGLPMQTACGRGIKLCSVCWKPRLSMCNSYTYWSIISCGHFAWLPAPKSLQLLMMMSAAFSSTVKPSCFCTRYFTKV
tet3	NM_001097187	10425	Xenopus (Silurana) tropicalis tet oncogene family member 3 (tet3), mRNA	2	3709	3847	no	1	441	6144	MMIEPVHAKARTQIPVVLLSLLGAHGACTLMVASMLVARPPGSSDL
LOC100494100	XM_002932972	10443	PREDICTED: Xenopus (Silurana) tropicalis electrogenic sodium bicarbonate cotransporter 4-like (LOC100494100), mRNA	2	1927	2161	no	1	0	4032	MAQQEEGLEVVAQEVKMVRCQLPMRLGKKLHILDGSAGGYIWISRGSFPGFLAISMKLFISSQFLPFCSSTWAVLPTP
LOC100494100	XM_002932972	10444	PREDICTED: Xenopus (Silurana) tropicalis electrogenic sodium bicarbonate cotransporter 4-like (LOC100494100), mRNA	2	865	1141	no	1	0	4032	MRALISAEPCLLLLSDYGTSWERMTTSQIQPCSLRWTLCSRKGMNWSGRRQQGGLNLKKKWRKEEKDGANLMCQLLLCIVCLSCGRVFRLEV
tulp1	NM_001016482	10452	Xenopus (Silurana) tropicalis tubby like protein 1 (tulp1), mRNA	2	1258	1498	no	1	51	1599	MKIVKESLFVPEMIMMDSCSDGRTRTWKILFNCTTRVQCGMMKHSPMCSTSMVELHIHLSKISRLSTLMTWITSSCSLDE
LOC548945	NM_001016191	10497	Xenopus (Silurana) tropicalis hypothetical protein LOC548945 (LOC548945), mRNA	2	514	703	yes	1	144	1584	MDLMDWILTGSIQEIQTEEVLQKPKSNTLSSCRKCIMHLCRKLVRATYPGFSSLLQCPLACPQ
frs3	NM_001113669	10527	Xenopus (Silurana) tropicalis fibroblast growth factor receptor substrate 3 (frs3), mRNA	2	427	583	yes	1	240	1791	MAMTLTSFPSKVGEGVRLVKGSLHSSAQGQKKSSTCFRSLCSGTASVLWKNL
LOC496913	XM_002932979	10531	PREDICTED: Xenopus (Silurana) tropicalis gastricsin, transcript variant 1 (LOC496913), mRNA	2	154	397	no	1	0	1149	MLLLLNPLQTTWICLTMERSALEPHLRISWFYLTLDLPICGLLLLTVKAKLAPTTHCLTLVSLPPTPQTSSNSPCNTELAA
LOC496913	XM_002932980	10534	PREDICTED: Xenopus (Silurana) tropicalis gastricsin, transcript variant 2 (LOC496913), mRNA	2	154	397	no	1	0	1146	MLLLLNPLQTTWICLTMERSALEPHLRISWFYLTLDLPICGLLLLTVKAKLAPTTHCLTLVSLPPTPQTSSNSPCNTELAA
LOC496913	XM_002932981	10537	PREDICTED: Xenopus (Silurana) tropicalis gastricsin, transcript variant 3 (LOC496913), mRNA	2	154	397	no	1	0	1140	MLLLLNPLQTTWICLTMERSALEPHLRISWFYLTLDLPICGLLLLTVKAKLAPTTHCLTLVSLPPTPQTSSNSPCNTELAA
mgc108380	NM_001032309	10551	Xenopus (Silurana) tropicalis mgc108380 protein (mgc108380), mRNA	3	176	446	no	2	0	1153	MTLLWHMSPCTWTHIIMERSALEHHPKTFWCYLTLDLPTYGFHLPPVKARPAVITTCLTPVSPLPIHLMGSNSQCHMAVVASLVSLAMIQ
gnai3	NM_001011471	10592	Xenopus (Silurana) tropicalis guanine nucleotide binding protein (G protein), alpha inhibiting activity polypeptide 3 (gnai3), mRNA	2	622	742	no	1	24	1086	MWVVRGQKGRNGSIVLRELLQSFSVWHSVIMTCCWLKMRK
LOC100216126	NM_001142105	10594	Xenopus (Silurana) tropicalis hypothetical protein LOC100216126 (LOC100216126), mRNA	1	909	1119	no	3	401	1463	MSRMCCAPELKQQESLNLSSPLKIFTSGCLMLEAKGQNVRSGSTVLRVSPASYSVGRLVLMTWYWWKMKK
ggnbp2	NM_001006808	10646	Xenopus (Silurana) tropicalis gametogenetin binding protein 2 (ggnbp2), mRNA	1	1431	1674	no	3	68	2075	MLVIVDTPLVWKEVNQALRRVQTWLVLKAFVNTMKRVMIKRRKKVIAVWNVGTIVQKTTLKEKTRKKRRNANLLNVKMRIL
rbbp5	NM_001030509	10678	Xenopus (Silurana) tropicalis retinoblastoma binding protein 5 (rbbp5), mRNA	2	1081	1249	no	3	248	1751	MGKEYWQLGENPTWNPWGVAFRCCMASSPPNYCFYLQWCGLHLGSESSGKLERICP
rnpep	NM_213691	10691	Xenopus (Silurana) tropicalis arginyl aminopeptidase (aminopeptidase B) (rnpep), mRNA	1	822	1017	no	3	68	1922	MYGEGMMYYSCHHLSHLVEWRTPASHLLPHVCWLVIAHWLMLSYTRFHTAGSGTWSPMPTGENFG
nuak2	NM_001128027	10708	Xenopus (Silurana) tropicalis NUAK family, SNF1-like kinase, 2 (nuak2), mRNA	3	605	737	no	2	43	1753	MHPLKLLMADRTLDLRWTAGPWVFCSTSWFMAACHLMGKTTRSW
klhdc8a	NM_001078849	10715	Xenopus (Silurana) tropicalis kelch domain containing 8A (klhdc8a), mRNA	3	671	941	yes	2	175	1225	MVPPLFCVGQKSMFWGEDRPNMQLMPLKSLTLRHAPGQNSQAFLIKGHTPDMCSVRALCTALEACVKEVPTADQNSPRQWIYSIWSKGAG
cul4a	NM_001015893	10754	Xenopus (Silurana) tropicalis cullin 4A (cul4a), mRNA	1	1485	1626	no	3	173	2432	MAKMFLKHFTKKIWLKDCWLGKVPLLILRSQCYQNLNMNVVLHLPVS
col4a1	XM_002933018	10822	PREDICTED: Xenopus (Silurana) tropicalis collagen alpha-1(IV) chain (col4a1), mRNA	2	4732	4993	no	1	396	5331	MVFLLQDTVRQRKHHNVLLEQLLFIVDIHCSMCKAMKEHMVRTWGLLGVVFVNLAQCLSSSAILIMSATLLQGMTTLIGFPPQNQCQ
LOC100486369	XM_002933019	10840	PREDICTED: Xenopus (Silurana) tropicalis myosin-XVI-like (LOC100486369), mRNA	2	859	1111	no	1	0	5448	MKISHQMLLLQKVFKTCCSKLNILLMKERKMEHPYAQNSKKSHMRRLHMIFLSLLINYVLWLYQFQNRIVFWKKTQCSKIRGKH
LOC100486369	XM_002933019	10846	PREDICTED: Xenopus (Silurana) tropicalis myosin-XVI-like (LOC100486369), mRNA	2	1252	1480	no	1	0	5448	MKFKRGSTIIKYILTLEIFFCLLIHTRTCLYTQPWLPNYTTITLEDYVPLFPHTFLLVLRELTICFSKRDDPSVLS
LOC100492214	XM_002933040	10911	PREDICTED: Xenopus (Silurana) tropicalis amiloride-sensitive cation channel 1, neuronal-like (LOC100492214), mRNA	2	685	1093	no	1	0	1722	MNTFPSGGTQRKPRLKQASKCRFTASQNHLSFRSWGSVWPPGSRPSWQLRSRDSLISHLRGVRADFLSWALTFSQYTVYRPVESTVRPDTLWKTVAARWCICQVMLHSAHRSSTRSVPSLHWVRTIFLCWMCFLRH
parp8	XM_002933029	10951	PREDICTED: Xenopus (Silurana) tropicalis poly [ADP-ribose] polymerase 8-like, transcript variant 1 (LOC100490473), mRNA	2	2605	2767	yes	1	210	2763	MVKSGLYPTPIMSVQDSFLCTRMDKLGIQVLTHKSQAFTKKSFELLATKLLLAX
parp8	XM_002933030	10953	PREDICTED: Xenopus (Silurana) tropicalis poly [ADP-ribose] polymerase 8-like, transcript variant 2 (LOC100490473), mRNA	2	2479	2641	yes	1	210	2637	MVKSGLYPTPIMSVQDSFLCTRMDKLGIQVLTHKSQAFTKKSFELLATKLLLAX
fgf10	NM_001016169	10965	Xenopus (Silurana) tropicalis fibroblast growth factor 10 (fgf10), mRNA	3	374	581	no	2	274	862	MRPGAGTGCAPRRWLPTPRPVGMCGAITTSRETCGVGSSSPTLSTFSRSMVTARSAAPRRRIALTVYWR
nnt	NM_001128002	10968	Xenopus (Silurana) tropicalis nicotinamide nucleotide transhydrogenase (nnt), nuclear gene encoding mitochondrial protein, mRNA	1	360	555	no	3	158	3416	MRREWRCLQLECRLWSNRALMWWWKQEPEKLLNSQMINTRRLGPKFRGPRMYWLRTWFLKCGRPC
paip1	NM_001097384	10975	Xenopus (Silurana) tropicalis hypothetical protein LOC100038266 (LOC100038266), mRNA	1	630	777	no	3	65	1241	MNHCKNLWNLFTSRQRLFQTSPTREHDCAITCPIICTLTHRTTTSGSYY
LOC100490930	XM_002933032	10979	PREDICTED: Xenopus (Silurana) tropicalis transmembrane protein C5orf28 homolog (LOC100490930), mRNA	3	452	650	yes	1	0	645	MDFPPRARRDTSWTVDLSVWKDCSTAILALCGSHCLPSQRMLSNHVSHWDETTHDYKARDTYRCVX
LOC100488297	XM_002933072	11041	PREDICTED: Xenopus (Silurana) tropicalis kelch domain-containing protein 8B-like (LOC100488297), mRNA	2	388	580	no	1	0	1077	MKGRFMHSEEWLPTHPLRLWLESTSQQKTYGCSSPPCLRRAMGPPPSCVGTKSMSWEDVRENFL
LOC100170549	NM_001130326	11055	Xenopus (Silurana) tropicalis hypothetical protein LOC100170549 (LOC100170549), mRNA	1	1233	1491	no	3	242	5801	MISHGDPQKPMTLTPANGATVTITLGSVTLIWLCTWPLGRRVGVYVMTVSTTQWDATASSASPSTTRTPGQTSGQTTPVSLVTATL
LOC100170549	NM_001130326	11059	Xenopus (Silurana) tropicalis hypothetical protein LOC100170549 (LOC100170549), mRNA	1	2871	3432	no	3	242	5801	MDLAHMDAANVTATLKVPPPGYAIPLQGSARVRAMLPADSVTSACQASGATLTVGRAYVMAILMSVTPRLGPASDAEIPLPGATVRSVWMDIMGTPYWALVNNAGHVLARGILAVAITMAAPAMLTRIPTKLCASVRLDIQGLAVTAAPLVTLGTLNRKAGSAGRVSATTTLTPLTLSHVTLIAGCA
lamb2	XM_002933055	11062	PREDICTED: Xenopus (Silurana) tropicalis laminin subunit beta-2-like (LOC100485566), mRNA	1	966	1257	no	3	188	5537	MPFTSWWYEGTASVMAMHLNARPSKECPEMSRAWCMEDVCANTIPRGSIVSNVIVPLMIFLGDQQKDAAPTPVKSATATITLASVTLTWPCTCLLEM
lamb2	XM_002933055	11063	PREDICTED: Xenopus (Silurana) tropicalis laminin subunit beta-2-like (LOC100485566), mRNA	1	2535	2823	no	3	188	5537	MVGSASVKLMSLGSAVIAVHQEHMDLDQQDAKPVNVIWRDPLTISVISAPVSVLVGQGHLAPGATAASLATGASQTAGSVSAMVIQKSATREQGHV
lamb2	XM_002933055	11064	PREDICTED: Xenopus (Silurana) tropicalis laminin subunit beta-2-like (LOC100485566), mRNA	1	3222	3510	no	3	188	5537	MGMHQGATAENVHVTTLGQNQASVHHGKTACVTEQADSAFAYQTSGVRTATVAVHTFGTWQAARAVSHVTVTPTIPSAYPAMSLQENVNAGLDSVA
usp19	NM_001079411	11078	Xenopus (Silurana) tropicalis ubiquitin specific peptidase 19 (usp19), mRNA	2	2704	2893	no	1	405	4710	MIPLWWIYSRASTSLSWCVLSVQRFPSHLTPSCISQFPCPRSRRFSLCITLPGSLTRSLLSFW
pim1	NM_001008131	11092	Xenopus (Silurana) tropicalis pim-1 oncogene (pim1), mRNA	1	732	894	no	3	155	1109	MLCTQTLTVHEYTALQSGSGSTNTTEGLPQCGPWGSCCMTWSAETYPLNMTMKS
qrich1.1	NM_001007959	11097	Xenopus (Silurana) tropicalis glutamine-rich 1 (qrich1), mRNA	2	1480	1651	no	1	225	2622	MGISTFQWLSRLWQGHTRIQHRLYIFGTLNSKQRYMSKFSSINNSNNISCRHKLLTK
impdh2	NM_001008065	11102	Xenopus (Silurana) tropicalis IMP (inosine 5'-monophosphate) dehydrogenase 2 (impdh2), mRNA	2	1312	1438	no	1	60	1602	MPWTRTSAARRDTSARRIRLRLRRACLGLSRTRDPFTSLFHI
arih2	NM_001005678	11117	Xenopus (Silurana) tropicalis ariadne homolog 2 (arih2), mRNA	1	549	675	no	3	167	1640	MLWHIPPITAPSVCSSYGRRIYSHLPVSTSFVAAVGSSTAQF
arih2	NM_001005678	11118	Xenopus (Silurana) tropicalis ariadne homolog 2 (arih2), mRNA	1	1005	1245	no	3	167	1640	MTPKPPTTSVLTLKIVPSAIFVLKRMEDAITCNVPNASTTSAGCVWGTGKPTAASIMNAVGTKRTQILSIRASRHRPERP
ip6k2	NM_001015955	11153	Xenopus (Silurana) tropicalis inositol hexaphosphate kinase 2 (ip6k2), mRNA	3	776	899	no	2	88	1375	MQPRKRKPIKLESVNRVHPRSLACECVVCRSTRRARGSLCL
LOC100489102	XM_002933077	11161	PREDICTED: Xenopus (Silurana) tropicalis cadherin EGF LAG seven-pass G-type receptor 3-like (LOC100489102), mRNA	2	7903	8218	no	1	0	9426	MWPCSTEMLEEVRILTRTVIYLWMRSAVYRSLRQRVKKIFALVADSSASSRKQRTVKGFLPTQLTTTLKMWTAMTSCLTGQPWGIRRFSPIHFRSGGQRENLGLT
copg1	NM_203843	11196	Xenopus (Silurana) tropicalis coatomer protein complex, subunit gamma (copg), mRNA	3	2105	2279	no	2	97	2719	MIRYWRMSQYRWSLQRDMKLFAVYLLKPYHTTSLAYAIPWYLFLRRIQIHWRVHSVAC
rab7a	NM_001008025	11213	Xenopus (Silurana) tropicalis RAB7A, member RAS oncogene family (rab7a), mRNA	2	595	787	no	1	114	735	MWNRLFKRLHGMHLNRRQRWSCTMNSRNPSNWTKMTEQRPLPRAAAAESEGRAKRESFTNRYHT
rpn1	NM_204063	11216	Xenopus (Silurana) tropicalis ribophorin I (rpn1), mRNA	1	768	894	no	3	14	1799	MITSASQTVAFHRSNPLRLYFLLLPKMFITGMRLGTFLQAIC
LOC100487142	XM_002933064	11224	PREDICTED: Xenopus (Silurana) tropicalis GATA-binding factor 2-like, transcript variant 1 (LOC100487142), mRNA	2	889	1057	no	1	0	1353	MVKTGHSLSPSGDCQQPEERAPAAPIARPPLRRYGDAMLMGTLCATPADSTTNCTM
LOC100487142	XM_002933064	11226	PREDICTED: Xenopus (Silurana) tropicalis GATA-binding factor 2-like, transcript variant 1 (LOC100487142), mRNA	2	670	886	no	1	0	1353	MCQHHTTTAAASFTLAVSLEVRPLVSPLNRGARADPAQKGESVSTVELQPPPYGEEMGPAIICVTPVASITK
LOC100487142	XM_002933066	11231	PREDICTED: Xenopus (Silurana) tropicalis GATA-binding factor 2-like, transcript variant 3 (LOC100487142), mRNA	2	670	886	no	1	0	1311	MCQHHTTTAAASFTLAVSLEVRPLVSPLNRGARADPAQKGESVSTVELQPPPYGEEMGPAIICVTPVASITK
LOC100487142	XM_002933065	11235	PREDICTED: Xenopus (Silurana) tropicalis GATA-binding factor 2-like, transcript variant 2 (LOC100487142), mRNA	2	676	892	no	1	0	1359	MCQHHTTTAAASFTLAVSLEVRPLVSPLNRGARADPAQKGESVSTVELQPPPYGEEMGPAIICVTPVASITK
LOC100487142	XM_002933065	11237	PREDICTED: Xenopus (Silurana) tropicalis GATA-binding factor 2-like, transcript variant 2 (LOC100487142), mRNA	2	895	1063	no	1	0	1359	MVKTGHSLSPSGDCQQPEERAPAAPIARPPLRRYGDAMLMGTLCATPADSTTNCTM
kbtbd12	XM_002933082	11252	PREDICTED: Xenopus (Silurana) tropicalis kelch repeat and BTB domain-containing protein 12-like (LOC100489900), mRNA	2	787	940	yes	1	0	1839	MAWRPPTFSFALATTQWASGQDMEVLGTQASALLLRQVNAVSFHHQNKERY
cacna2d1	NM_001097269	11302	Xenopus (Silurana) tropicalis calcium channel, voltage-dependent, alpha 2/delta subunit 1 (cacna2d1), mRNA	1	1290	1458	no	3	200	3428	MEGRIRQKKHLKPTIRIKLFVFSPFLLGNIIMTRDLFSGWLAKIKDSTMRFHLLEQ
LOC100495840	XM_002933096	11313	PREDICTED: Xenopus (Silurana) tropicalis hepatocyte growth factor-like (LOC100495840), mRNA	2	598	718	yes	1	0	2124	MENTTEVQWIIQNQEKNVSAGIYRGPISTSFAQKDILTRG
LOC100495840	XM_002933096	11314	PREDICTED: Xenopus (Silurana) tropicalis hepatocyte growth factor-like (LOC100495840), mRNA	2	721	862	no	1	0	2124	MIITAATLMASPGLGVTLLTLTPPGSSVQLNPAYTALSTIQILQKSA
sema3c	XM_002933086	11321	PREDICTED: Xenopus (Silurana) tropicalis sema domain, immunoglobulin domain (Ig), short basic domain, secreted, (semaphorin) 3C (sema3c), mRNA	1	1785	1929	no	3	479	2723	MQQMGSTMSYSLEQTKGLFRKLLLFLLMVQQVGNSSWKKWKYLRVMLL
sema3c	XM_002933086	11322	PREDICTED: Xenopus (Silurana) tropicalis sema domain, immunoglobulin domain (Ig), short basic domain, secreted, (semaphorin) 3C (sema3c), mRNA	1	1968	2136	no	3	479	2723	MLAQKKALPSCLYIAATFMVLPVLTVALQGTHIVLGMENFVPDFIHLEKGEVEDKM
gnai1	NM_001097396	11331	Xenopus (Silurana) tropicalis guanine nucleotide binding protein (G protein), alpha inhibiting activity polypeptide 1 (gnai1), mRNA	1	1164	1293	no	3	278	1340	MKRQLHTFSVSLKISIKERIQKKYTLILHVQQIPRMCNLCLMQ
LOC100496144	XM_002933098	11338	PREDICTED: Xenopus (Silurana) tropicalis putative homeodomain transcription factor 2-like (LOC100496144), mRNA	2	724	1018	no	1	0	2097	MFRMKSQVKMTQAQDIQHNVIWTGRFVTVQSEIENLTITKSTILQRTSKNQELVAALAVLAPDKILKAPGQNQKQKMSSGRISCTVLSVALPAVVKQT
LOC100496144	XM_002933098	11340	PREDICTED: Xenopus (Silurana) tropicalis putative homeodomain transcription factor 2-like (LOC100496144), mRNA	2	394	589	yes	1	0	2097	MALVLLIIHKRELCRATVQAPLTLLAQSSGISCMQLSSYRVQRKQNIPVTNLQKLTMVTSRLKGD
dnajc2	XM_002933091	11389	PREDICTED: Xenopus (Silurana) tropicalis DnaJ (Hsp40) homolog, subfamily C, member 2 (dnajc2), mRNA	3	1856	1985	yes	1	132	1992	MGEDSRSCPWQIQERLHEKIQGTGGNGKSKKSCSRTSAECHQD
psmc2	NM_203824	11391	Xenopus (Silurana) tropicalis proteasome (prosome, macropain) 26S subunit, ATPase, 2 (psmc2), mRNA	1	714	912	no	3	14	1313	MPASSESLDLSLCRNTWEREPVWCVSYLRWPEPKKHVLFSLMKLMPLVGLVLMMELEVITKSSALC
reln	NM_001137612	11398	Xenopus (Silurana) tropicalis reelin (reln), mRNA	1	7170	7371	yes	3	263	10652	MDISIAHGSLIKFLLVEMFLVTLSLKMTFPVWITKSGFSIQEAQKCLYADLVEMPLYLLRRQALDML
reln	NM_001137612	11399	Xenopus (Silurana) tropicalis reelin (reln), mRNA	1	9216	9363	no	3	263	10652	MEELLGHCCMKWITRNTCQCAMTTYSSPRMPKQTQLACVGGSLSLSAMA
reln	NM_001137612	11409	Xenopus (Silurana) tropicalis reelin (reln), mRNA	1	9708	10104	no	3	263	10652	MPELIRGSWYRLSAFLPPQTVLVVLHFCFMKPPFIILLIALYGNVLPCNSLIMFHQVPLSSAGFRKGMRQRSKAGQLTMCILEKPVPSCAVAMDTVQLEQFAYVTRDIKVMTALCLTMTYQATLKIILNLKK
reln	NM_001137612	11413	Xenopus (Silurana) tropicalis reelin (reln), mRNA	1	5523	5685	yes	3	263	10652	MVQGLMPGPLIMLCFLQGVHGCVLAMEYVILVTVCVTGVLEVRTVSLSAPYLQS
reln	NM_001137612	11414	Xenopus (Silurana) tropicalis reelin (reln), mRNA	1	5961	6108	no	3	263	10652	MNFILPRPQMYCLSMFLFQTLPRPMQLAFVSGNLTTTEKKMKFGSLKTL
mll5	XM_002933106	11425	PREDICTED: Xenopus (Silurana) tropicalis myeloid/lymphoid or mixed-lineage leukemia 5 (trithorax homolog) (mll5), mRNA	3	1688	1994	no	2	511	5626	MQGHLEMRLDLYDVPAHLMLRCDMLLKKELFTYIYTPFQAFQKGQKSLLLLILIMQIVNIRWIVHASKTIQTAQFSDAVQSLQKITVAMKLEEKRGKRKKNF
mll5	XM_002933106	11426	PREDICTED: Xenopus (Silurana) tropicalis myeloid/lymphoid or mixed-lineage leukemia 5 (trithorax homolog) (mll5), mRNA	3	5516	5636	no	2	511	5626	MEFKDLSRHQQCLARFLFIGHRYLRPSRIITMAQDGIRIG
srpk3	NM_001102962	11430	Xenopus (Silurana) tropicalis SRSF protein kinase 3 (srpk3), mRNA	2	1360	1516	no	1	84	2178	MNQMLKVIIHIAAHMNNLTVNCQMDSIKIQNYNFQSFRPQSSLRLWNLQHVV
pus7	NM_001016884	11432	Xenopus (Silurana) tropicalis pseudouridylate synthase 7 homolog (pus7), mRNA	1	1449	1578	no	2	160	2107	MCGRSATAGTFNVWSQKHSFCIWHNPKEQPFNVYPQLSELCLE
rint1	XM_002933107	11437	PREDICTED: Xenopus (Silurana) tropicalis RAD50 interactor 1 (rint1), mRNA	3	1247	1385	no	2	244	2476	MMTFCFVTLWMKYFCFRENFTHHMVIPAISQTACTFYLKKPVFKDG
atxn7l1	XM_002933108	11440	PREDICTED: Xenopus (Silurana) tropicalis ataxin-7-like protein 1-like (LOC100498036), mRNA	2	805	991	yes	1	0	2517	MAPKPATSLTKDFQKGNLTQINTAVYWILRPRNHVQDHLHARHIHLTTGEQYQVGKNSLTFS
sypl1	NM_203750	11454	Xenopus (Silurana) tropicalis synaptophysin-like 1 (sypl1), mRNA	3	620	833	no	1	90	792	MSAWARVTHGKSEHLCGVWIFESDTVGRKCLVCIQGDKPTYSSTTTKPGASTWKCFSMNLKINPIEMPIHI
pik3cg	NM_001127956	11464	Xenopus (Silurana) tropicalis phosphoinositide-3-kinase, catalytic, gamma polypeptide (pik3cg), mRNA	1	2676	2802	yes	3	155	3485	MEMTYGKICLFYRSFASWALYGKLNHWTCVYCHMAAFPLETK
hbp1	NM_001008148	11470	Xenopus (Silurana) tropicalis HMG-box transcription factor 1 (hbp1), mRNA	3	1049	1196	yes	2	43	1636	MVFPVVKFMLEMYVYLPDTQMPSILMILVFLILLKVMTLPQWILLLCMC
LOC100485157	XM_002933113	11492	PREDICTED: Xenopus (Silurana) tropicalis e3 ubiquitin-protein ligase Hakai-like (LOC100485157), mRNA	2	292	418	no	1	0	1317	MIPFNALSSVHVALSSCVALCKVAREHIYLKEICRHTLTTVT
lamb1	XM_002933094	11509	PREDICTED: Xenopus (Silurana) tropicalis laminin subunit beta-1-like (LOC100495516), mRNA	1	957	1296	no	3	11	5357	MICLGDQQKVAVAMLVKNVTVTNIPHTVILIWLFICLLGIPVEGCVMTANTTQWGGIVNSANHFSTSIQIKTYVIQTSVNPAIVTQLDPRMEEYVTAIQIFPWALLLDSVVAS
lamb1	XM_002933094	11512	PREDICTED: Xenopus (Silurana) tropicalis laminin subunit beta-1-like (LOC100495516), mRNA	1	3297	3609	no	3	11	5357	MSSLVSASACLDLGDEIAVNARNFSGEIQISSAELVIVTLEASRHHSVIALQGIVFAKKELKEFAVTSVHVDILEHSHTAHLVTNALLCGISLSRSFLTEQSSF
LOC100485623	XM_002933116	11518	PREDICTED: Xenopus (Silurana) tropicalis laminin subunit beta-4-like (LOC100485623), mRNA	2	2641	2803	no	1	0	4611	MEQTVKDARIITMEILFWDSLVVHVCVQILLIVTGILHIPATKTLIVRKWCVVA
LOC100487604	XM_002933122	11551	PREDICTED: Xenopus (Silurana) tropicalis progressive ankylosis protein homolog (LOC100487604), mRNA	2	265	508	no	3	371	1847	MQTVILLQAASQRCAPGVLLYYHPMCLGCLLTDRDYGEIAGSHSLLAPHPFLGSSGDHQHRHRLRRAGIKSGYCCRQGGCH
LOC100488093	XM_002933125	11571	PREDICTED: Xenopus (Silurana) tropicalis cadherin-18-like (LOC100488093), mRNA	3	929	1142	no	2	376	2737	MGMTLHMETVQGLFIVFFKGNLTFQLIPKQVLSEQHCPTWTGKLENTILLLFKLKTWLVKLEDFLDQQQSM
cdh12	XM_002933130	11573	PREDICTED: Xenopus (Silurana) tropicalis cadherin-12-like (LOC100489783), mRNA	2	475	604	no	1	0	2298	MQMTQHMEAVQEWFTAFFRDSLTFLLILRQESSEQHYQTWTEK
wac	NM_001011171	11582	Xenopus (Silurana) tropicalis WW domain containing adaptor with coiled-coil (wac), mRNA	2	319	1252	no	1	309	2193	MQGNKRDSVMAVTTEGTPNPTRLLSIHPRVIPAAVITVMTRCETPQILLHQTKCEDQTVLKISILTVQDMVKPKACTFTESVRGMEGPVFLHKKIHITTVLFIVQIHILLLQAKLLILRMILQMTGLSILVLLGKNIIITAELKFPSGKNLKSGLKESKDKKRRAKWQLTVSPRIEITEEKQCKLLQLWRRNIPVIPARCSHRISCPKQAGTMTETTDCQEQTLTVVLPQCNSQLKQRFTQLLPQARFLLALLQYSLIILLQRNLMMQMELLYPNCLHPHLPYQCRNLKGKKRHLLINPPVQLLPHHLRLD
armc4	NM_001079026	11589	Xenopus (Silurana) tropicalis armadillo repeat containing 4 (armc4), mRNA	2	1774	2032	no	1	60	3219	MWQNLGGLGALLDSTVVSGDWLDCWTVRLLVHLTSALNRRRTLRWHAVGLWLCGAAAKALGIRKQFAKLGAFLCWPDYSNPPIPIC
LOC100494966	XM_002933140	11605	PREDICTED: Xenopus (Silurana) tropicalis ATP-dependent metalloprotease YME1L1-like (LOC100494966), mRNA	2	1051	1204	no	1	0	2181	MFPFTMLQALNLMRCLLAWEQVALEIYSGKQKAMHLVLYLLMSWIQLGARE
LOC100494966	XM_002933140	11607	PREDICTED: Xenopus (Silurana) tropicalis ATP-dependent metalloprotease YME1L1-like (LOC100494966), mRNA	2	1657	1837	no	1	0	2181	MSPAMQLLRTIPRMPCPLIKLQSCPGDPHLDMCPYCLRTIAGVRPDLSFLLKWMSAWAEE
abi1	NM_001007487	11618	Xenopus (Silurana) tropicalis abl-interactor 1 (abi1), mRNA	3	1199	1421	no	2	91	1519	MRSPCSMILLLHLRHLQLIMKKKKLQWCSTMIPTPTETLFGHPSPILRKLLPFMTIQKTKKMSCHLWREPLFTL
abi1	NM_001007487	11619	Xenopus (Silurana) tropicalis abl-interactor 1 (abi1), mRNA	3	287	425	no	2	91	1519	MHWPTMCSSYWIFKPPSCGEWSPPSTISPRLWIFIKKRWLAERSVS
apbb1ip	NM_001102933	11627	Xenopus (Silurana) tropicalis amyloid beta (A4) precursor protein-binding, family B, member 1 interacting protein (apbb1ip), mRNA	2	754	892	no	1	78	2052	MKTLLNFYQTGQETAKIRLIFCRRMRNMQCLKTPRISIWQEKEVQM
apbb1ip	NM_001102933	11628	Xenopus (Silurana) tropicalis amyloid beta (A4) precursor protein-binding, family B, member 1 interacting protein (apbb1ip), mRNA	2	997	1117	yes	1	78	2052	MAKSHGKSATFSCGLLEFIMSPKEKLRPPATWRALCSSTT
LOC100493984	XM_002933134	11673	PREDICTED: Xenopus (Silurana) tropicalis OTU domain-containing protein 1-like (LOC100493984), mRNA	1	1215	1374	no	3	374	1325	MSGGTGRTKRKGSGTRNWPSLWPFPSPKCTSSKTLVREASAKLAKHGTLGAPR
mllt10	XM_002933149	11715	PREDICTED: Xenopus (Silurana) tropicalis protein AF-10 (mllt10), mRNA	3	410	584	yes	2	118	3313	MGVGLTWYVHYIYPRFSLLMFLQWSRLCYSLCPMNDTTRLAIFVMSKGERAKLLLVLV
nebl	XM_002933150	11723	PREDICTED: Xenopus (Silurana) tropicalis nebulette-like (LOC100496676), mRNA	2	976	1237	no	1	0	3051	MHLQVITCTRRNLRNRRESIILRWIQQSRFITKRMLCCKARLNTRRNMRSLREGHCLNLLILHHIKFQRRLRRYRVRKNIEKIWKKG
LOC100496835	XM_002933151	11733	PREDICTED: Xenopus (Silurana) tropicalis MAM and LDL-receptor class A domain-containing protein C10orf112-like (LOC100496835), mRNA	2	1516	1669	no	1	0	5454	MTVEMGLMRKTVILNYNVAWNQTCATGCKIRMMILTGQDIKVQLQRLIQGR
atp9a	NM_203901	11759	Xenopus (Silurana) tropicalis ATPase, class II, type 9A (atp9a), mRNA	3	98	260	no	1	30	3165	MLPLCRMLRSSGAEATNRLAWAPREKGTEIPQKRHKQSKIQLLHIPSRDPLQPV
prex1	XM_002933157	11839	PREDICTED: Xenopus (Silurana) tropicalis phosphatidylinositol 3,4,5-trisphosphate-dependent Rac exchanger 1 protein-like (LOC100488039), mRNA	1	1209	1410	no	3	329	5243	MDPCTYSVAGSIPKLWRLRMWRTEQRTITVMATPSPTDGKSTTRRKTSGSSAWPKQPKRSRSGWTQF
prex1	XM_002933157	11845	PREDICTED: Xenopus (Silurana) tropicalis phosphatidylinositol 3,4,5-trisphosphate-dependent Rac exchanger 1 protein-like (LOC100488039), mRNA	1	1965	2124	yes	3	329	5243	MASCITCWRKANLKTSHSSLDFMPTRRWKEPALKTNSSVMTSNSLKISWQRPS
ncoa3	XM_002933158	11857	PREDICTED: Xenopus (Silurana) tropicalis nuclear receptor coactivator 3 (ncoa3), mRNA	1	687	972	no	3	263	4448	MSPSIYNTNKRIWLTLVSTASCTKRTVKISLRTCPNLLLMASHGPAKPLDRRATHSTVACWSRPLMIIWRMGVATWTHVSDMRPCSALPYLSPGR
LOC100492055	XM_002933180	11927	PREDICTED: Xenopus (Silurana) tropicalis brefeldin A-inhibited guanine nucleotide-exchange protein 2-like (LOC100492055), mRNA	2	3691	3814	no	1	0	6135	MTVKLPTCVWKGYDVQSEFHVFLTCSLKETHMSRLWHVFHC
LOC100492055	XM_002933180	11929	PREDICTED: Xenopus (Silurana) tropicalis brefeldin A-inhibited guanine nucleotide-exchange protein 2-like (LOC100492055), mRNA	2	2131	2344	no	1	0	6135	MSCVLKLFPFSFSCQYCRTLVQYSEHMKCSLTQSSNTSVWHCQKMECPLCLMSLNSHSPYFSPCCHTLKCT
LOC100492055	XM_002933180	11930	PREDICTED: Xenopus (Silurana) tropicalis brefeldin A-inhibited guanine nucleotide-exchange protein 2-like (LOC100492055), mRNA	2	964	1195	no	1	0	6135	MKPLGPMSCVLKLFPFSFSCQYCRTLVQYSEHMKCSLTQSSNTSVWHCQKMECPLCLMSLNSHSPYFSPCCHTLKCT
LOC100492055	XM_002933180	11933	PREDICTED: Xenopus (Silurana) tropicalis brefeldin A-inhibited guanine nucleotide-exchange protein 2-like (LOC100492055), mRNA	3	1430	1628	no	1	0	6135	MLQYLSGKQKPGKSDHGQSHADADAERHFHPNGKSSAAGTAGICDTASENPLACALQSNGISKPQT
LOC100492055	XM_002933180	11934	PREDICTED: Xenopus (Silurana) tropicalis brefeldin A-inhibited guanine nucleotide-exchange protein 2-like (LOC100492055), mRNA	3	506	704	no	1	0	6135	MLQYLSGKQKPGKSDHGQSHADADAERHFHPNGKSSAAGTAGICDTASENPLACALQSNGISKPQT
serinc3	NM_001016331	11956	Xenopus (Silurana) tropicalis serine incorporator 3 (serinc3), mRNA	1	642	948	no	2	7	1417	MLFFIYNRRCPPLRILHEVRRLHREQILHQFQHDPVCDRICHFHPSKSAGASATVWSSPVLGDYFIYNVSDLVFNVQRTRSILQPKLAEHHIDNKLASDHPF
LOC100487448	XM_002933215	11999	PREDICTED: Xenopus (Silurana) tropicalis nuclear receptor coactivator 7-like (LOC100487448), mRNA	2	853	1054	no	1	0	2583	MRYHPTYPRIFVLCTGLESGKICHQKRISIRLANLRILAKKRGSRMESLDKALQRTSLLLHQAKILI
galc	NM_001078802	12020	Xenopus (Silurana) tropicalis galactosylceramidase (galc), mRNA	3	980	1112	yes	1	15	2049	MEWKLCGINTHMDHCTHYPVHAARLVLSQNGWTFRQRWKLRGTD
eml5	XM_002933196	12051	PREDICTED: Xenopus (Silurana) tropicalis echinoderm microtubule associated protein like 5, transcript variant 1 (eml5), mRNA	2	349	499	no	1	0	5913	MGSAWSLLDLMPRIQSVCGTGKKGRCFLWLLVTQIGYLTSPGTSTNPINL
eml5	XM_002933196	12053	PREDICTED: Xenopus (Silurana) tropicalis echinoderm microtubule associated protein like 5, transcript variant 1 (eml5), mRNA	2	1873	2020	no	1	0	5913	MSQSWTLRLSKRPKPLTVGRFIKKIYLSLKSNAKTSTEVLLPRDGNVLL
eml5	XM_002933197	12060	PREDICTED: Xenopus (Silurana) tropicalis echinoderm microtubule associated protein like 5, transcript variant 2 (eml5), mRNA	2	349	499	no	1	0	5892	MGSAWSLLDLMPRIQSVCGTGKKGRCFLWLLVTQIGYLTSPGTSTNPINL
eml5	XM_002933197	12062	PREDICTED: Xenopus (Silurana) tropicalis echinoderm microtubule associated protein like 5, transcript variant 2 (eml5), mRNA	2	1873	2020	no	1	0	5892	MSQSWTLRLSKRPKPLTVGRFIKKIYLSLKSNAKTSTEVLLPRDGNVLL
foxn3	NM_001016300	12072	Xenopus (Silurana) tropicalis forkhead box N3 (foxn3), mRNA	1	432	570	no	3	164	1622	MMTPLLHLLSQTCPMTLSRTQTANPHILSVVSYLWPSRTLPPRDCQ
psmc1	NM_001045689	12087	Xenopus (Silurana) tropicalis proteasome (prosome, macropain) 26S subunit, ATPase, 1 (psmc1), mRNA	1	27	156	yes	3	0	1322	MAQEVAKKMIRIRRRNMSHQYQPELVRRKRKQRDQMLPVNCLL
lgmn	NM_001005720	12157	Xenopus (Silurana) tropicalis legumain (lgmn), mRNA	3	683	812	no	2	76	1375	MYMQPQLPTPTNHHTPVTMMRNVTLTWEIYTVSAGWKILIWRT
btbd7	XM_002933211	12190	PREDICTED: Xenopus (Silurana) tropicalis BTB/POZ domain-containing protein 7-like (LOC100486833), mRNA	2	109	292	yes	1	0	3366	MAMNQNCTALIMVMKNHRTKKRKRLALLHLKRSLLNGVNRADLLIMLSKCENCYRVGMSEM
ppm1l	XM_002933234	12235	PREDICTED: Xenopus (Silurana) tropicalis protein phosphatase, Mg2+/Mn2+ dependent, 1L (ppm1l), mRNA	2	268	478	no	1	108	1143	MSASEGSMCWKRSSLRLGSTRATMWPCIPSRAGGITWRTASRSSLTWSTRATLPSSASLMAMEESQQLNM
schip1	NM_001110054	12262	Xenopus (Silurana) tropicalis schwannomin interacting protein 1 (schip1), mRNA	3	695	818	no	2	118	1387	MKGNRSGRSLHLGVSLMMALAYTPVVARAANQAYLPDYKVG
LOC100494046	XM_002933239	12276	PREDICTED: Xenopus (Silurana) tropicalis elongation factor G, mitochondrial-like (LOC100494046), mRNA	2	1213	1339	no	1	0	2244	MLKKLTQVIYVHCLALTVRVETPSQVNPTIISPWNPYMYQTQ
tiparp	NM_001112942	12317	Xenopus (Silurana) tropicalis TCDD-inducible poly(ADP-ribose) polymerase (tiparp), mRNA	2	1768	1966	no	1	135	2163	MKGICSTGPRRMLLMQFANTTLTPECAGSMPPCLDRAVTLPGKPAIHTTFPNAPPKEFTICFWLKC
tiparp	NM_001112942	12318	Xenopus (Silurana) tropicalis TCDD-inducible poly(ADP-ribose) polymerase (tiparp), mRNA	2	2047	2239	no	1	135	2163	MTLVWTTSLSPRFLLYLTMIRATLILLSSMKKLATLSPFNNMKAALMSLRICYLNWWEKKETEK
p2ry1	NM_001102752	12365	Xenopus (Silurana) tropicalis purinergic receptor P2Y, G-protein coupled, 1 (p2ry1), mRNA	3	188	338	no	1	102	1185	MLSDKDRLSVLLPPCRLYCSLYHRIHWEQCGHMDVHFSYETMEQYLSLHV
kcnh7	XM_002933260	12368	PREDICTED: Xenopus (Silurana) tropicalis potassium voltage-gated channel subfamily H member 7-like (LOC100486080), mRNA	2	19	151	no	1	0	3579	MLHRRTPSWGPSYANLKDKIKNSSLPMPESRTALSFTAMTASVK
fap	NM_001113673	12385	Xenopus (Silurana) tropicalis fibroblast activation protein, alpha (fap), mRNA	2	1789	1957	no	1	81	2346	MEEEPRIKETSSCMQSTRSLGRLRLKIRYLQPESLLLWDSLMRSESQYGVGHTEDM
fap	NM_001113673	12387	Xenopus (Silurana) tropicalis fibroblast activation protein, alpha (fap), mRNA	2	2176	2314	no	1	81	2346	MIMCISNKLLRFPRLWWRRKWISKQCGTRTRTIPSLDQRRLTCLPT
fap	NM_001113673	12388	Xenopus (Silurana) tropicalis fibroblast activation protein, alpha (fap), mRNA	3	1931	2054	yes	1	81	2346	MGLVIRRICDINGPGARNWTFQMWNGRGSSLQLGVLCLNLY
dpp4	NM_001016233	12394	Xenopus (Silurana) tropicalis dipeptidyl-peptidase 4 (dpp4), mRNA	2	757	877	no	1	186	2439	MEFQIGCMKRKCFLLIMLYGGHRMQRLWPMLNSMILMYRP
LOC100488456	XM_002933275	12399	PREDICTED: Xenopus (Silurana) tropicalis sodium-driven chloride bicarbonate exchanger-like (LOC100488456), mRNA	2	1852	2020	yes	1	0	4863	MDGNPLPTTHHPKGSSSFLAQRMMMKNTFPMISSLSWMRFAYVKGMMQNGERWQGG
LOC100488456	XM_002933275	12400	PREDICTED: Xenopus (Silurana) tropicalis sodium-driven chloride bicarbonate exchanger-like (LOC100488456), mRNA	2	715	1696	no	1	0	4863	MSWLPVCMSWRPVCMSWLPVCMSWLPVCMSWRPVYMSWRPVCMSWLPVCMSWLPVCMSWLPVCMSWLPVCMSWLPVCMSWLPVCMSWLPVCMSWLPVCMSWLPVCMSWLPVCMSWLPVCMSWLPVCMSWLPVYMSWLPVCMSWLPVYMSWLPVCMSWLPVCMSWRPVYMSWLPVCMSWRPVCMPWLPVCMSWRPVCMSWLPVCMSWRPVCMPWLPVCMSWLPVCMSWRPVCMPWLPVCMSWLPVCMSWRPVCMSWLPVCMSWLPVCMSWLPVCMSWRPVCMPWLPVLQWILGVEEPCCLGAVTCSILCATREMMRRQWWTEVELVLF
LOC100488456	XM_002933275	12401	PREDICTED: Xenopus (Silurana) tropicalis sodium-driven chloride bicarbonate exchanger-like (LOC100488456), mRNA	2	2974	3124	no	1	0	4863	MSRGKLPSSGVTSRMLSAYNVWLQFCSFTVLVCLLLSRLEVFSERQLKVV
LOC100488456	XM_002933275	12402	PREDICTED: Xenopus (Silurana) tropicalis sodium-driven chloride bicarbonate exchanger-like (LOC100488456), mRNA	3	4103	4229	no	1	0	4863	MFCHGTSVVCSCHCPLHNTCQQSETGVGVLSTWRTTQVFGYP
tbr1	NM_001079119	12409	Xenopus (Silurana) tropicalis T-box, brain, 1 (tbr1), mRNA	3	428	839	no	2	163	2194	MGSLRFVTVSMDLQQIVISSLSPVSPSLLPLLPLLLCSLIPASMELLTQPSPSEAPAGTWRTTLSSPMELTTASWAILPRKDIPPPDTPTASSMAIPTRRPPSTSSLPPSPDWSLAKPKSICVTGHSGSSSTGTKPK
rbms1	NM_001097163	12418	Xenopus (Silurana) tropicalis RNA binding motif, single stranded interacting protein 1 (rbms1), mRNA	3	638	782	no	2	34	1252	MENSLKRYLEFLLLRNPCCASLQTEDRRSARIRTNMSRMEEPGLERAR
LOC100488773	XM_002933277	12433	PREDICTED: Xenopus (Silurana) tropicalis secretory phospholipase A2 receptor-like (LOC100488773), mRNA	2	505	703	no	1	0	4098	MRASVSIIFKRSIPLGGMDWGDLVFSPSNTTICGTMNVSRKEEKTDYIGAPPPCDMTAMENGDYAQ
march7	XM_002933281	12453	PREDICTED: Xenopus (Silurana) tropicalis membrane-associated ring finger (C3HC4) 7 (march7), mRNA	2	931	1483	no	1	0	2079	MDDQQRQRNRHLVYEIHLLSAVLLRHRVPIHPRTGHLNNLRDLPFSDGDAGVCPLSLPVRVQTLMQRVTDQRTQKQDHLPHGYHLHSETDARLSFPGEGEKEGMKQPEHHLPPLTLTEFIIRSGGDLQKWNLQRKVMEPQHPLQTPVLTLLVVHPWQIPFSVGEILAFRECFPAHFCIFQCPVD
baz2b	XM_002933265	12467	PREDICTED: Xenopus (Silurana) tropicalis bromodomain adjacent to zinc finger domain, 2B, transcript variant 1 (baz2b), mRNA	3	6089	6224	no	2	346	6760	MRSCCFSVTAVIKAATRTVTGPKSPPSLRVTGSAQLALPRQVGTT
baz2b	XM_002933265	12469	PREDICTED: Xenopus (Silurana) tropicalis bromodomain adjacent to zinc finger domain, 2B, transcript variant 1 (baz2b), mRNA	3	1229	1397	no	2	346	6760	MGTNLRSPRRKELTSRYLLFQTPRLAYHSSPSKNILRFCPSIFPLLSQALRPRRRL
baz2b	XM_002933266	12475	PREDICTED: Xenopus (Silurana) tropicalis bromodomain adjacent to zinc finger domain, 2B, transcript variant 2 (baz2b), mRNA	2	697	865	no	1	0	6264	MGTNLRSPRRKELTSRYLLFQTPRLAYHSSPSKNILRFCPSIFPLLSQALRPRRRL
baz2b	XM_002933266	12478	PREDICTED: Xenopus (Silurana) tropicalis bromodomain adjacent to zinc finger domain, 2B, transcript variant 2 (baz2b), mRNA	2	5593	5728	no	1	0	6264	MRSCCFSVTAVIKAATRTVTGPKSPPSLRVTGSAQLALPRQVGTT
LOC100492269	XM_002933284	12531	PREDICTED: Xenopus (Silurana) tropicalis cell division cycle-associated 7-like protein-like (LOC100492269), mRNA	3	782	968	no	2	64	1141	MLQTQSRIKFMIRFWVVLVINVGRKQLTLRQFAVILDAVVSEGNFVGPACGTAMGKMFEKHF
sp4	XM_002933296	12537	PREDICTED: Xenopus (Silurana) tropicalis transcription factor Sp4-like (LOC100494434), mRNA	2	1912	2089	no	1	0	2292	MGRPLTSELIYVGTLGKDLLFAIGYSVAKGLQEVMNYKGTEGLTQVKKDLNALNAQRDL
LOC100492825	XM_002933288	12554	PREDICTED: Xenopus (Silurana) tropicalis multidrug resistance protein 2-like (LOC100492825), mRNA	2	3223	3451	no	1	0	3795	MIRRKEKCCWMMWMPNASMSNGFVLKWELCPKSLSCLTAALLKISPMVTTPALCLWMKYKVQPKRPISTHSYKDFL
abcb5	NM_203923	12557	Xenopus (Silurana) tropicalis ATP-binding cassette, sub-family B (MDR/TAP), member 5 (abcb5), mRNA	1	3264	3477	no	3	53	3836	MIQRKEKCCWMMWMPNASMSSGFVLKWELCPKSLSCLTAALLKISPMVTTPALCLWMKYKVQPKRPISTHS
itgb8	XM_002933298	12569	PREDICTED: Xenopus (Silurana) tropicalis integrin beta-8-like (LOC100494899), mRNA	2	1354	1684	no	1	0	2184	MILQTVRQLHVKKKSAAPMSWTLRLKAAGLPHLSQSAAAGAFACAGNAFARKLNWEQYMGNTVKRTPFLALTIMVNCVLVTEIVKMGNADALMAGKVTAAIVLPRSENTV
syf2	NM_001037263	12613	Xenopus (Silurana) tropicalis SYF2 homolog, RNA splicing factor (syf2), mRNA	1	531	792	yes	3	8	755	MVLTYPPNLGLTEWSQILKNRLKNVKNTAAGVHTTMMLILTTLMRGMQNSTRRQRDFMANTLRRSNRTWKEGLLSKLAFLLHLFFVL
meox2	NM_001123426	12621	Xenopus (Silurana) tropicalis mesenchyme homeobox 2 (meox2), mRNA	2	145	298	no	1	150	1050	MPWNTHCLAACAAPMPPLRAYTPLPSLLLPSMEDPTTCPILIYPLLRPLAY
etv1	NM_203888	12632	Xenopus (Silurana) tropicalis ets variant 1 (etv1), mRNA	1	627	942	no	3	125	1610	MHHPTLHRLRNQTGFTHRIFLHPNPYQITAIPWTIDFADSSLNRAILSHHCLQCQGKGAPCISGRCLSQAFSFLHKDLNRSTMIPFMNTTIWLEMHPAKPTLHLL
igf1r	XM_002933305	12648	PREDICTED: Xenopus (Silurana) tropicalis insulin-like growth factor 1 receptor (igf1r), mRNA	1	4941	5115	yes	3	1385	5471	MVFSQLTQMSGPLVLCYGRLPLLQSSLTKGCPMSRFFASLWKEAFWRSPITALTCCLN
nr2f2	NM_001114231	12660	Xenopus (Silurana) tropicalis nuclear receptor subfamily 2, group F, member 2 (nr2f2), mRNA	1	396	693	no	2	130	1354	MRGLQELLQAKCKAKSHLHVSCQQELSHRPTPPQSVSVLSPQKMPQSWHETGSRTEGQNATHTAYTRAVRLDKWRPSQLPFLPIRIYIVTPEGRTLPDL
nr2f2	NM_001114231	12661	Xenopus (Silurana) tropicalis nuclear receptor subfamily 2, group F, member 2 (nr2f2), mRNA	3	1082	1244	no	2	130	1354	MPVVCLMWHMWKVCKKSPNVLWKNMLEASTQTNQQDLGNCYFDCPPSALSPPLS
rgma	NM_203725	12668	Xenopus (Silurana) tropicalis RGM domain family, member A (rgma), mRNA	2	454	667	yes	1	99	1443	MAPPLSHAYASCLQGTAKSAPTAPKYAIMRKASTDPLPFQTIPTVASLETHTLGRFQTLSRPAKYKVLGPS
rgma	NM_203725	12670	Xenopus (Silurana) tropicalis RGM domain family, member A (rgma), mRNA	3	143	308	no	1	99	1443	MDGYGERGRTQSPGILQNPHCLLVHVSYSELIVQDFEVHCRLLASDFKPTSSRRT
chd2	XM_002933307	12676	PREDICTED: Xenopus (Silurana) tropicalis chromodomain-helicase-DNA-binding protein 2-like (LOC100497210), mRNA	2	5290	6067	no	1	675	6102	MPGSCTNYIRWHTKRDLKKKRITRKRMCLSRNLFDQSNLDLAGTLMCHNLKGHIHHRNRLLSHLTPSKCIAIKEKTLAVLTRDLLIMQSEVSGETGNSITEAITTTSHGVVTAITNMTSIGTKITIIQNEDHMGIQGEALQTSGQTTCPAKDHMTNITMIETTVDTGTIMTDITMTTNEEDPMIFDPRVTTSRTSEEWDLTTGPPWATIVKDLQTTTAHSILRSLGIIKVPLNQLLSLTLAHPLLKDPHMITNHPWTGH
chd2	XM_002933307	12679	PREDICTED: Xenopus (Silurana) tropicalis chromodomain-helicase-DNA-binding protein 2-like (LOC100497210), mRNA	2	1909	2047	no	1	675	6102	MNRSICASGWVSHILNAAGKMVPLLGRSSSTVLTVLTAETTQKQHL
chd2	XM_002933307	12682	PREDICTED: Xenopus (Silurana) tropicalis chromodomain-helicase-DNA-binding protein 2-like (LOC100497210), mRNA	2	3928	4255	no	1	675	6102	MTVSLIWSQSRKLSVPLDPRVTQMTPMMTKSQSAEDGHEVLGKTMLRDLLMLRSDGLLRLTRSLLLHWKDWSALPEMQSLWKNLWQISRGWVNCCTTAVLQPCRNSKSN
chd2	XM_002933307	12683	PREDICTED: Xenopus (Silurana) tropicalis chromodomain-helicase-DNA-binding protein 2-like (LOC100497210), mRNA	2	1534	1678	no	1	675	6102	MQQKKMGILTLNLTLKLMKGSNNILLSGKAGLTSTVPGRVKILFSSRR
LOC100498508	XM_002933314	12702	PREDICTED: Xenopus (Silurana) tropicalis solute carrier organic anion transporter family member 3A1-like (LOC100498508), mRNA	2	1354	1501	no	1	0	2121	METSLSLVPLWSDTLPATLTVSARLTPSLLCVVLMESHICLLALLAARK
LOC100498508	XM_002933314	12703	PREDICTED: Xenopus (Silurana) tropicalis solute carrier organic anion transporter family member 3A1-like (LOC100498508), mRNA	3	1568	1691	no	1	0	2121	MSQPWLSRGLSHIPVCHVRLQHDRSYGPDAVSYHSHQGSKS
klhl25	NM_001079073	12715	Xenopus (Silurana) tropicalis kelch-like 25 (klhl25), mRNA	2	274	460	no	1	6	1773	MTAFTQRYWSSYLTLLTLPKLSLMKKMPNLFWKLEICFSFMIYGMQLVNFWRRTFIPQIVWE
LOC100487606	XM_002933317	12718	PREDICTED: Xenopus (Silurana) tropicalis vascular endothelial growth factor C-like (LOC100487606), mRNA	2	607	892	no	1	0	1221	MFTDKFIQLLDDPCQPPNCNVRWQTRLALEITFGTTMCADVSCSMTLSFHQVQKKKIMKRHLMIYVAQTKSLMKRHASVSAKVDWYLQAVVLKKN
wdr17	XM_002933318	12729	PREDICTED: Xenopus (Silurana) tropicalis WD repeat-containing protein 17-like (LOC100487772), mRNA	3	236	740	no	2	121	4066	MSVLLVETGLPTVPRLQSMCTSWITVTMNLNCGPLCPSTRRQSQQYLGVRTTQICLQVPALIILSSFGMWLSRKLLLGSIAQKECQPLLAGAGTLQMLLHLFHTEGPSTFGLFPDQIVVWPFTKRHIVSCQTSVCSGGIQRKKAKWFSGTQMEAFQFSSQDVRAKSMS
gpm6a	NM_001079383	12732	Xenopus (Silurana) tropicalis glycoprotein M6A (gpm6a), mRNA	1	1098	1284	no	3	377	1211	MSKMHAECRSMKTSSLRKNRSCMIFILLVLKRGSMHIHKIIILLICNISILCCLTNSLPSIV
fbxo8	NM_001126821	12745	Xenopus (Silurana) tropicalis F-box protein 8 (fbxo8), mRNA	1	381	609	no	3	131	1079	MPQTSVWHHVFGKTWPMMKYFGRGYANPPGVTVLYTIKGILWVFLFGISTCAWMKGVLHSMQIHTGELNILYQGAF
galnt7	NM_001001200	12753	Xenopus (Silurana) tropicalis UDP-N-acetyl-alpha-D-galactosamine:polypeptide N-acetylgalactosaminyltransferase 7 (GalNAc-T7) (galnt7), mRNA	2	1687	1849	no	1	144	2103	MISPNTFHFHLKMLNGERLEALRRITALTVWAIPTEGLWNWGDATEWEEINFSV
galntl6	XM_002933320	12756	PREDICTED: Xenopus (Silurana) tropicalis polypeptide N-acetylgalactosaminyltransferase-like 6-like, transcript variant 2 (LOC100487935), mRNA	2	1480	1606	no	1	0	1803	MNSFLPLDGERTYARGNLFTQENSALIQYPIAALLHYMIAMA
galntl6	XM_002933319	12762	PREDICTED: Xenopus (Silurana) tropicalis polypeptide N-acetylgalactosaminyltransferase-like 6-like, transcript variant 1 (LOC100487935), mRNA	2	1477	1603	no	1	0	1800	MNSFLPLDGERTYARGNLFTQENSALIQYPIAALLHYMIAMA
clcn3	NM_001142088	12774	Xenopus (Silurana) tropicalis chloride channel 3 (clcn3), mRNA	2	628	802	no	3	71	2525	MPTVADMGRSNNWPSRRPWILYNELYHVHFLGPKFCLSRCVSCESICPLCVWFRNSRD
sh3rf1	NM_001015973	12788	Xenopus (Silurana) tropicalis SH3 domain containing ring finger 1 (sh3rf1), mRNA	1	1203	1419	no	3	335	2918	MQRRTPKSVTPLPPSPCLTSHRSPCRIVIQWRLAPLYSSVLAIPPLLPGSVNSQASLVVPLLRFISVQQGSL
palld	XM_002933327	12797	PREDICTED: Xenopus (Silurana) tropicalis palladin, cytoskeletal associated protein (palld), mRNA	2	4018	4240	no	1	0	4257	MLVGILCQQRMKLVLCPVLPDWTYTLSGINSLLPQRQERYVHQPVAMQHFLTKAWTSKLLSCPKQTLCTYSQHW
trip12	NM_001142912	12872	Xenopus (Silurana) tropicalis hypothetical protein LOC100158539 (LOC100158539), mRNA	1	5745	5880	no	3	62	6230	MKACPGNLTHLEMALNLFFHSTTYSISIQRSWISFCVEVEQTLGM
mff	XM_002933362	12882	PREDICTED: Xenopus (Silurana) tropicalis mitochondrial fission factor (mff), mRNA	1	549	813	yes	3	98	1010	MDNLSDMTPSRLRLPLQAACAPLPRPLQLEQIFSLPVAFCRSSRPPPAGLISRSLMCWMKTAGQSCVVDRQILLQSPIMITPGLQCPL
klhl24	NM_001078869	13015	Xenopus (Silurana) tropicalis kelch-like 24 (klhl24), mRNA	3	638	956	no	2	235	2035	MSSISLKPPACFRSVFYGMPVPSSWKSSWTLAIVWGSNILQTLTLSKPSSPSVKVLLNRPLKMLFSMKNFWNWEKPSSLIMFPPMSLLSAKRSWYSKPSCVGFIIM
fam168b	NM_001078734	13027	Xenopus (Silurana) tropicalis family with sequence similarity 168, member B (fam168b), mRNA	1	237	456	no	3	197	782	MLMPKGLVILQASQWAMLQLLLRILQTCMLDPILLFNQGTHQVHHTKCHAHPPVGRYHLILHPQILTKRQYIQ
atg16l1	NM_001017343	13045	Xenopus (Silurana) tropicalis ATG16 autophagy related 16-like 1 (atg16l1), mRNA	1	1575	1899	no	3	5	1871	MTLSKSLTCVPMLCSKPSVPRALSVDQTGLGLYLALMAVMCLLVRQKEHFTSGTSLQEKWRGCLASNTVPLSMLWLGHPLGHTWSALTKEAVECCGLTFDCHRFKLFP
kif1a	XM_002933334	13113	PREDICTED: Xenopus (Silurana) tropicalis kinesin family member 1A (kif1a), mRNA	2	391	511	no	1	192	5310	MRASVRCIVTLEKRCCFTHLKDTMSVSLPMDRLGLGNPTL
LOC100498193	XM_002933336	13134	PREDICTED: Xenopus (Silurana) tropicalis rootletin-like (LOC100498193), mRNA	1	489	699	no	3	74	6008	MRRRWHINANCQPIRRGSRGKLSWYRDYKTRFYSIKGGVENWSSSFWRKLLRASSKDWHSKHGWTLQKQN
LOC100498350	XM_002933337	13138	PREDICTED: Xenopus (Silurana) tropicalis sushi, nidogen and EGF-like domain-containing protein 1-like (LOC100498350), mRNA	2	2107	2416	yes	1	0	3633	MGHPARTGFPTLSVNARKGTVESIVSKKLMSVCHSHVKMGVPVRICLGPSNVFVLRVSLDLIVRQRWMDVTLLRARMEACVRTWRVLICACVPAAFLAITVRQ
LOC100498350	XM_002933337	13139	PREDICTED: Xenopus (Silurana) tropicalis sushi, nidogen and EGF-like domain-containing protein 1-like (LOC100498350), mRNA	2	1120	1579	no	1	0	3633	MEQPALTWVQVTAACAHRPSLGRSVTRVSISYQAHVHQILVRTKVCAGRQKEATCVTAPQVSVACTASTVCPMTAPAGMEGDVQMETALVTARQDTLGFSVNMRSPRYRAAWVHSVQMADPAWNMVEVTCVCVTQITSLVTTQYPHPVTRIPA
hdlbp	NM_001006853	13156	Xenopus (Silurana) tropicalis high density lipoprotein binding protein (vigilin) (hdlbp), mRNA	1	1278	1434	no	3	203	4052	MPRLTALQWLPSLLLHGCIGSSLAKKDRTWQRSHSKYQRCTLSLQKEKTKSL
chn2	XM_002933382	13181	PREDICTED: Xenopus (Silurana) tropicalis beta-chimaerin-like (LOC100496459), mRNA	1	636	771	no	3	26	1427	MTTISTTRKHTTSRFTRSGGHTGVNTVPISCGVSLLRESVAQTVG
LOC100498464	XM_002933391	13193	PREDICTED: Xenopus (Silurana) tropicalis cyclic AMP-responsive element-binding protein 5-like (LOC100498464), mRNA	2	1015	1252	no	1	0	1578	MRIRHTIRRLHTLPCTQGDKHSSHQQHSKCSPLRQYSPNSPREAVAGGLWMRIQTKGGESFWKGTEQLPPGADRKGRSG
LOC100496608	XM_002933383	13197	PREDICTED: Xenopus (Silurana) tropicalis juxtaposed with another zinc finger protein 1-like (LOC100496608), mRNA	1	726	897	no	3	161	893	MALSTMPRTGTEHRSECVNLSSVAVGRVTRQLRVSVTIQSISIHRSLPRSSGRCSNX
LOC100496893	XM_002933384	13210	PREDICTED: Xenopus (Silurana) tropicalis homeobox protein XHOX-3-like (LOC100496893), mRNA	1	633	861	no	3	179	1364	MAAIHPREVSDPTVPSPPVPGTRCADTGQPSPGSRSHDWRRNFTGKTMCPGPGGVNWLRPSTCLRPLSRCGSKIGG
LOC100485428	XM_002933395	13222	PREDICTED: Xenopus (Silurana) tropicalis homeobox protein Hox-A9-like (LOC100485428), mRNA	2	220	631	no	1	0	1461	MCPVCITPICTTSPPFQPLTAGTCALGWTPWLPDPCPSPASPPAGVMASNLNRWLLEGATAPHSILAPCQCRTIRAAPPLTGTSRSATPRLLSPMERIPATERSRQLIQVRTERGVARPTPVTRLWSWRKNFTLIAT
hoxa3	NM_001127429	13232	Xenopus (Silurana) tropicalis homeobox A3 (hoxa3), mRNA	2	232	373	no	3	296	1514	MLFFTGVKTLSVCEINIGKQRNAKSDLLRQLCDLWWISLPRSKWFHL
tra2a	NM_001004819	13278	Xenopus (Silurana) tropicalis transformer 2 alpha homolog (tra2a), mRNA	3	557	1019	yes	2	148	1009	MVPFLVSMWFMISVQEGQEALPLSTLSELKIPERQWSMQMEWNWMAGESELTTLSQKERIPPLQAYIWEDLPMVAAAVVEVVAAVEVVAAAVVVVVVEAAVAVTHIMIGDMTEAMTDTMNMTTDTEDDPHHLITADTDPGHDHVLTAQGATRTS
klhl7	NM_001004916	13304	Xenopus (Silurana) tropicalis kelch-like 7 (klhl7), mRNA	3	1499	1622	no	1	123	1737	MEDGVTNALERRDCKMCCCRLCHLCPRWFSRSWPFRAYPGI
c7orf25	NM_001016099	13333	Xenopus (Silurana) tropicalis chromosome 7 open reading frame 25 (c7orf25), mRNA	1	435	567	yes	3	26	1298	MEIKASLNRQKIFYKPALSSRCSIAAHISYLPFTIASPNLWLKS
LOC100489784	XM_002933404	13339	PREDICTED: Xenopus (Silurana) tropicalis zinc finger protein GLI3-like, transcript variant 2 (LOC100489784), mRNA	2	763	943	no	1	0	4710	MLILFHPLQLLVLELMPSIWNIFMPWRAHGFQVLECHYDQVAREHCPYHLFLIIALISRQ
LOC100489784	XM_002933404	13344	PREDICTED: Xenopus (Silurana) tropicalis zinc finger protein GLI3-like, transcript variant 2 (LOC100489784), mRNA	2	121	253	no	1	0	4710	MRMKVLDRHITEKEETPSPCSLMEAKVLVKSMRNPLRQVRKGPH
LOC100489784	XM_002933403	13350	PREDICTED: Xenopus (Silurana) tropicalis zinc finger protein GLI3-like, transcript variant 1 (LOC100489784), mRNA	2	751	931	no	1	0	4698	MLILFHPLQLLVLELMPSIWNIFMPWRAHGFQVLECHYDQVAREHCPYHLFLIIALISRQ
LOC100489784	XM_002933403	13355	PREDICTED: Xenopus (Silurana) tropicalis zinc finger protein GLI3-like, transcript variant 1 (LOC100489784), mRNA	2	121	253	no	1	0	4698	MRMKVLDRHITEKEETPSPCSLMEAKVLVKSMRNPLRQVRKGPH
clptm1l	NM_001126072	13371	Xenopus (Silurana) tropicalis CLPTM1-like (clptm1l), mRNA	3	356	509	no	2	130	1747	MLTTLMWIQNLKELSMLLYRRKLETMVPCTHMYFFITLESCLGMMGSRCIY
trank1	XM_002933422	13440	PREDICTED: Xenopus (Silurana) tropicalis TPR and ankyrin repeat-containing protein 1-like (LOC100493537), mRNA	2	4111	4234	no	1	120	8751	MKRMFYTIYLASYQNLKSYHGPFMSSMEMRFKTLHKQSSPC
trank1	XM_002933422	13441	PREDICTED: Xenopus (Silurana) tropicalis TPR and ankyrin repeat-containing protein 1-like (LOC100493537), mRNA	2	5146	5335	no	1	120	8751	MPATNAGKLLLSVTRRERQLRRRNWLLPIMLFYICQKKKLVPGKSKWSIYGLQKHTWNAENQN
LOC100498255	XM_002933436	13465	PREDICTED: Xenopus (Silurana) tropicalis uncharacterized protein KIAA0825 homolog (LOC100498255), mRNA	2	1450	1606	no	1	0	3021	MQRVITGMTTKSFMRENAAHFLSRCGITFAVDFGMIYGLYCLHFLLKTYSKK
LOC100498255	XM_002933436	13466	PREDICTED: Xenopus (Silurana) tropicalis uncharacterized protein KIAA0825 homolog (LOC100498255), mRNA	2	1042	1165	yes	1	0	3021	MGQLQRGRNQRKLQSFVLTLSKNLTPYFHWLWHARMSPFWM
pcsk1	XM_002933430	13514	PREDICTED: Xenopus (Silurana) tropicalis neuroendocrine convertase 1-like (LOC100496933), mRNA	1	1230	1413	no	3	113	2339	MSAQRRTPAPLLQLHWLPGSLLSHWNLTLTLPGGICSTWWFGHQSTTRWLTMLAGRKMALG
pcsk1	XM_002933430	13515	PREDICTED: Xenopus (Silurana) tropicalis neuroendocrine convertase 1-like (LOC100496933), mRNA	1	984	1212	yes	3	113	2339	MASNRGEMEKVPSLFGHLEMVGDRVITVTVMDTQTAFTPSLSAVLPSKVCLPGMLRNALPPWPQHTAVGTTQIREL
pcsk1	XM_002933430	13516	PREDICTED: Xenopus (Silurana) tropicalis neuroendocrine convertase 1-like (LOC100496933), mRNA	1	615	849	no	3	113	2339	MMVWNGTTLISMPITTQKQAMISMTMTMTPFPDMILQMKTDTGQDVLGKLPWLPITINVESELHIMQRLGAYGCWMVL
chd1	XM_002933443	13550	PREDICTED: Xenopus (Silurana) tropicalis chromodomain-helicase-DNA-binding protein 1-like (LOC100485675), mRNA	1	594	819	yes	3	554	5678	MEIQAILMTILVQDLDLALEAVVMEAVASREAVTLKVVQNQEANLIRTRQKKRKLYNPNHQDWMEQSFGSPIQVF
chd1	XM_002933443	13551	PREDICTED: Xenopus (Silurana) tropicalis chromodomain-helicase-DNA-binding protein 1-like (LOC100485675), mRNA	1	3531	3717	no	3	554	5678	MEVKVDAAGTEGTLDLTVIPCLIENAPKKEVGHEQFQEKILKGLVMLRYGGLLKATKSLADL
chd1	XM_002933443	13554	PREDICTED: Xenopus (Silurana) tropicalis chromodomain-helicase-DNA-binding protein 1-like (LOC100485675), mRNA	1	5142	5388	no	3	554	5678	MMTAAEIVIPLKDIHSIMITTTKTDIRVMLIRKEIPEKGRTPASAMGKTTETGTTTTNRTGTTVKVNTENWMTTEVEIIDQT
ppip5k2	NM_001113825	13586	Xenopus (Silurana) tropicalis diphosphoinositol pentakisphosphate kinase 2 (ppip5k2), mRNA	3	4349	4643	no	2	355	1912	MKTPIRMFHQKKDFMLSCTSVQERKAVKKIKICLLALGIDLLPKRMKAPRSTLMEMTAMRNPVCAEEMNLTEQLLCLSPWCLIPFIYIGSLHYPGPGR
ppip5k2	NM_001113825	13587	Xenopus (Silurana) tropicalis diphosphoinositol pentakisphosphate kinase 2 (ppip5k2), mRNA	3	980	1136	no	2	355	1912	MFTFIIQHQLVEAASAFSERLAAGAVCIHQKAVYGRLGHTFMKSLCQQMVLM
c5orf30	NM_001097345	13592	Xenopus (Silurana) tropicalis chromosome 5 open reading frame 30 (c5orf30), mRNA	2	430	598	no	1	87	702	MKSQQSTEGGEGGCQAQGISAIKLFRTNLTKLFMVLCRFVYLKGKEPTQSLWTTSI
fryl	XM_002933446	13604	PREDICTED: Xenopus (Silurana) tropicalis FRY-like, transcript variant 1 (fryl), mRNA	2	7228	7570	no	1	0	9168	MFSRCVGQILGFPKTPQWFSHQMKSWKQETSRPASSPAQRKPFRRRRSLWRIQAVNSSLEFLRTLIFWTWSWKMLRVKVWITSTGESAGDHWTALIKAIPRLCRNASTLAAPPV
fryl	XM_002933446	13605	PREDICTED: Xenopus (Silurana) tropicalis FRY-like, transcript variant 1 (fryl), mRNA	2	8035	8314	no	1	0	9168	MRDVKRKKLISLISQARTRENRTALQRFSRPHLLHPFSLRFWLLSSLWPTRMRRKPGAAMSIRCCLRQMAPVQFTLFMCSPGCFRPFRGSLGH
fryl	XM_002933446	13606	PREDICTED: Xenopus (Silurana) tropicalis FRY-like, transcript variant 1 (fryl), mRNA	2	3310	3451	no	1	0	9168	MFQCTREEAFSLSRAFAIASSCSSAIGQDPSASCSPHWTDTAIATCK
fryl	XM_002933447	13612	PREDICTED: Xenopus (Silurana) tropicalis FRY-like, transcript variant 2 (fryl), mRNA	2	3157	3298	no	1	0	9033	MFQCTREEAFSLSRAFAIASSCSSAIGQDPSASCSPHWTDTAIATCK
fryl	XM_002933447	13613	PREDICTED: Xenopus (Silurana) tropicalis FRY-like, transcript variant 2 (fryl), mRNA	2	7882	8161	no	1	0	9033	MRDVKRKKLISLISQARTRENRTALQRFSRPHLLHPFSLRFWLLSSLWPTRMRRKPGAAMSIRCCLRQMAPVQFTLFMCSPGCFRPFRGSLGH
fryl	XM_002933447	13615	PREDICTED: Xenopus (Silurana) tropicalis FRY-like, transcript variant 2 (fryl), mRNA	2	7078	7420	no	1	0	9033	MFSRCVGQILGFPKTPQWFSHQMKSWKQETSRPASSPAQRKPFRRRRSLWRIQAVNSSLEFLRTLIFWTWSWKMLRVKVWITSTGESAGDHWTALIKAIPRLCRNASTLAAPPV
zar1	NM_001016947	13620	Xenopus (Silurana) tropicalis zygote arrest 1 (zar1), mRNA	1	642	825	yes	3	32	935	MVITTVRTATSDGRAPTCGVCRAQIRCTSSSSVGHVRNPIIPTVWKTSCVRAASRPDACVQ
LOC100491823	XM_002933460	13629	PREDICTED: Xenopus (Silurana) tropicalis magnesium transporter NIPA3-like (LOC100491823), mRNA	3	365	509	yes	1	0	1272	MALVGRIALNGSRRSRQFRRLCICSSDAGNTTWRIECASMRCAVITFP
LOC100491997	XM_002933461	13632	PREDICTED: Xenopus (Silurana) tropicalis cyclic nucleotide-gated channel rod photoreceptor subunit alpha-like (LOC100491997), mRNA	2	982	1114	no	1	0	2124	MHVFTIPFLRLLDLGKIHGSIPTQVIRSMEDWRENMCTVFTGQH
nfxl1	NM_001169135	13642	Xenopus (Silurana) tropicalis nuclear transcription factor, X-box binding-like 1 (nfxl1), mRNA	2	1453	1594	no	1	81	2703	MQKECLVTSHICVKLSALKFGIARDTSARESAVLGTVLDVTNNVDVP
gabrb1	XM_002933448	13651	PREDICTED: Xenopus (Silurana) tropicalis gamma-aminobutyric acid receptor subunit beta-1-like (LOC100489344), mRNA	3	1037	1241	no	2	526	1957	MNKTAHLKLKVMATRQMTSSFTGTEGTKPSQELKRLSCLSFLLSTIKWFQGTSFSPLVPILGCRLVFA
bend4	XM_002933452	13674	PREDICTED: Xenopus (Silurana) tropicalis BEN domain containing 4 (bend4), mRNA	2	1114	1360	no	1	0	1515	MRQSTLRRRTGGGFCDTSLDLYSQQMSLNIRVALGKGKGQCSQETLVLRGVPWILLKLHVSESSLGCTAHQTPTGGCLQKNR
apbb2	NM_001123451	13702	Xenopus (Silurana) tropicalis amyloid beta (A4) precursor protein-binding, family B, member 2 (apbb2), mRNA	3	869	1331	no	2	268	2539	MGICCHLNRTISLVLRIVRALLYHPAQRLRKTTQKLVQKLTVLYTESRTWLQVMKIQVGPHCPKTAHPLYLQMRQQIYGVTTRFKLIQIFHLAGRKSMISLASTTGIYQLEQLSGNARSQHLQISQPHAKDHSALSHQHPHQKMRNSLGVILLF
ugdh	NM_001013610	13733	Xenopus (Silurana) tropicalis UDP-glucose 6-dehydrogenase (ugdh), mRNA	1	570	804	no	3	23	1505	MRHLRVKKPCVHYVKFMNTGYPQKKLLQPILGHQNYQNWQPMLSLPRESAVLTQSVPFVRLREQMWRKLLELLEWIRE
wdr19	NM_001123477	13757	Xenopus (Silurana) tropicalis WD repeat domain 19 (wdr19), mRNA	1	3879	4026	no	2	19	2560	MRRGSTLTKQPLCIFAVRIGQRLGSCFHMYHLQRSTCSMQRQRRLMESK
wdr19	NM_001123477	13763	Xenopus (Silurana) tropicalis WD repeat domain 19 (wdr19), mRNA	2	5248	5422	no	2	19	2560	MRLSNWRSSTTRWRFMLILLDLKTPVLKIIRVLLYTLRERRNISKLGNFSCCVGSMRG
wdr19	NM_001123477	13765	Xenopus (Silurana) tropicalis WD repeat domain 19 (wdr19), mRNA	3	1652	1871	no	2	19	2560	MIICMRFLIFPQPLKEFYGKTGEWTEVSLLPTTMINCTLTSFIRTQYKGQRLFSLGEPSCHSRISQFFYIMGT
gucy1b3	XM_002933474	13784	PREDICTED: Xenopus (Silurana) tropicalis guanylate cyclase 1, soluble, beta 3 (gucy1b3), mRNA	3	167	476	no	2	40	1879	MMTQKPMTWYLQQPKYLISMRVTFSRCLEICFLFFAKSLATTQSYVSWDPMSENFCRTWMPCTTTLVLFIQACVLHPSDVLTQRKEKDLFCTTIQNEKVSRTL
fgg	XM_002933478	13808	PREDICTED: Xenopus (Silurana) tropicalis fibrinogen gamma chain, transcript variant 2 (fgg), mRNA	2	982	1135	no	1	60	1374	MLAMPLMDLILEMIQVTSSSHLTMECSSVLMTEIMTNLKETVLSKMGLVGG
fgg	XM_002933477	13811	PREDICTED: Xenopus (Silurana) tropicalis fibrinogen gamma chain, transcript variant 1 (fgg), mRNA	2	925	1078	no	1	0	1317	MLAMPLMDLILEMIQVTSSSHLTMECSSVLMTEIMTNLKETVLSKMGLVGG
fga	XM_002933489	13815	PREDICTED: Xenopus (Silurana) tropicalis fibrinogen alpha chain (fga), mRNA	2	1660	1783	no	1	0	2361	MISVKNTVLVPKVAFSKSGQKDPLRCYQCIATKIPSWEDGS
ercc8	NM_001017179	13861	Xenopus (Silurana) tropicalis excision repair cross-complementing rodent repair deficiency, complementation group 8 (ercc8), mRNA	1	555	714	no	3	344	1541	MILPIFINPSLTLVKHCVRWAKATLICTNLVWKQFNGILMILASLHQAHLIKH
fbxw7	XM_002933481	13868	PREDICTED: Xenopus (Silurana) tropicalis F-box and WD repeat domain containing 7, transcript variant 1 (fbxw7), mRNA	2	2728	2893	no	1	0	2109	MEISMLVLAVGLYKWDCCPTAVLYSQWPNIFMLLTERRKKKQNFFFFFIIIILLL
fbxw7	XM_002933482	13873	PREDICTED: Xenopus (Silurana) tropicalis F-box and WD repeat domain containing 7, transcript variant 2 (fbxw7), mRNA	2	2386	2551	no	1	0	1767	MEISMLVLAVGLYKWDCCPTAVLYSQWPNIFMLLTERRKKKQNFFFFFIIIILLL
lrba	XM_002933499	13895	PREDICTED: Xenopus (Silurana) tropicalis LPS-responsive vesicle trafficking, beach and anchor containing (lrba), mRNA	3	1292	1541	no	2	193	8434	MPLRYLQSISWALDTREHLNSRQKVISFLQSTISCYCMMANCQAQLLSHITQELLMPSFAWNHLPKITHLSLFILLMHLCCRM
lrba	XM_002933499	13900	PREDICTED: Xenopus (Silurana) tropicalis LPS-responsive vesicle trafficking, beach and anchor containing (lrba), mRNA	3	6344	6470	no	2	193	8434	MILDLRKWMPRYLPTLKDCTENGCSQRSVLFFHVATFCKTQL
LOC100487296	XM_002933500	13911	PREDICTED: Xenopus (Silurana) tropicalis serine/threonine-protein kinase DCLK2-like (LOC100487296), mRNA	2	337	499	no	1	0	2142	MSASRRGCAASIHWMATRRSAAWRSCRKVKVMCVPQMSHIVKWIIIEMSVRTGL
arhgap10	XM_002933502	13923	PREDICTED: Xenopus (Silurana) tropicalis Rho GTPase activating protein 10 (arhgap10), mRNA	1	1167	1374	no	3	626	2918	MSVNFRKSRSGKNLSLWNLCCCSFKGFSPSIIRAMNLQRILATTNWIYKSTSKIHEIGLMVLDPRLKNF
LOC100490985	XM_002933514	13927	PREDICTED: Xenopus (Silurana) tropicalis plexin-A2-like (LOC100490985), mRNA	1	1035	1311	no	3	461	1940	MASRIISQHFPAESCLETQNPLPCWIMSCTVTLYHLSLKSHQTHLPWSHILTFFTCMGFLVAIMSISSLFSQKLQRASPAIQPMTYSTRPAL
LOC100490985	XM_002933514	13928	PREDICTED: Xenopus (Silurana) tropicalis plexin-A2-like (LOC100490985), mRNA	1	831	981	no	3	461	1940	MLKTVSWPVGACIRVCASFFVWMICLSLWSHLTRKSTISQALTKQVPCME
LOC100490985	XM_002933514	13929	PREDICTED: Xenopus (Silurana) tropicalis plexin-A2-like (LOC100490985), mRNA	1	1464	1617	no	3	461	1940	MMFFLPYSPKARSSITTHLMILHCVYSQSRLLTHLLKKGYSLATKERVIWN
LOC100494644	XM_002933536	13968	PREDICTED: Xenopus (Silurana) tropicalis calcium/calmodulin-dependent protein kinase type 1G-like (LOC100494644), mRNA	2	745	1000	yes	1	0	1863	MASCLPHVALQDMWHRKSLLKNHTVKQWTVGRLESLPIFYYVDTLHFMKKQSPDFLRRLEKEHMSLNLRFGMTFPNLQKTSLAAS
rabgef1	NM_204000	14068	Xenopus (Silurana) tropicalis RAB guanine nucleotide exchange factor (GEF) 1 (rabgef1), mRNA	2	91	355	no	1	60	1047	MLTNQNFCVRKGVATMGTQPGKDFAPSAGGRSTRKLGRSKSRMTGNWQNACNVKKRRHIQAAREPRQGHNLLRFQSLKKRNPMKRPGK
cdc5l	NM_001008201	14121	Xenopus (Silurana) tropicalis CDC5 cell division cycle 5-like (cdc5l), mRNA	2	529	898	no	1	195	2607	MRRSPQTILASLSQEKLIQILKQSQQGQIQWTWMKMSLRCSRRLELVLPTLKAKKPRGKHEKSSWKKPDVLQPYRRGESFELPESKFRRRGKRSAAWTTTPKSHLKRSLPPGSIIHLKKTMMP
cdc5l	NM_001008201	14122	Xenopus (Silurana) tropicalis CDC5 cell division cycle 5-like (cdc5l), mRNA	2	271	424	yes	1	195	2607	MGKTSGLVLLPCCTGNRPNSAKPDGMNGLTQASKRQNGPEKKRRNYFIWPS
zmcm3	NM_001045766	14245	Xenopus (Silurana) tropicalis zygotic DNA replication licensing factor mcm3 (zmcm3), mRNA	2	1393	1810	no	1	60	2487	MPAAVCWLPLTLSMEGMTSIKLQWTTLACRTLSCLVLICSSLCWIRWTRNRTGRYPTMFCECTDIELPESRTVMLCPWAAQWIFLPPTIPMLPARNSRNCKCMRSTIVFSMGLRRERRRSLASNSCENTSTSPKYSNRC
paqr8	NM_001078951	14247	Xenopus (Silurana) tropicalis progestin and adipoQ receptor family member VIII (paqr8), mRNA	2	1159	1312	yes	1	696	1755	MAVLWPTTTTVPTKLGMTRPGTSFYQELLSWDGCLALVAAMLNTAIKGPIQ
ctsb	NM_203894	14278	Xenopus (Silurana) tropicalis cathepsin B (ctsb), mRNA	3	806	1058	no	2	37	1036	MPTSQCTSQVCTSMKPEKNLEVMLLRSWDGVWKMAPPIGCVQTLGTLIGVIMASSRFCVARITAGSSLRLLPEFPKTRAFINFF
xkr6	NM_001033943	14300	Xenopus (Silurana) tropicalis XK, Kell blood group complex subunit-related family, member 6 (xkr6), mRNA	1	1419	1629	yes	3	59	1859	MVFCIPRGPALRYSPAPVALSCSGVFLCLPTLNPWRHKPRGTAGPRPHQPEPPRSNRMTLLQTHACQFSR
limk1	NM_001079432	14320	Xenopus (Silurana) tropicalis LIM domain kinase 1 (limk1), mRNA	1	387	612	yes	3	326	2171	MDCQCVPVVDRVFMMGAICRHWHWIGTLIASDVVTAVCPCPTDITRRMGGCSARSTTGHALGACAKAVLKISPKA
pdk3	NM_001113682	14390	Xenopus (Silurana) tropicalis pyruvate dehydrogenase kinase, isozyme 3 (pdk3), nuclear gene encoding mitochondrial protein, mRNA	2	1252	1645	yes	1	276	1491	MACPSHDYMPDISKETSSSIPWKVLGLMLLSILRPFPANHLKGSRFLTSQRGDTIRTQPKQMTGAIQAGSHGMLPNTNLINLGNLLGNGITPHGLESDFLPVRIGDCREYNNNNKGLLIMQPVHLEKKKKK
pola1	XM_002933612	14396	PREDICTED: Xenopus (Silurana) tropicalis polymerase (DNA directed), alpha 1, catalytic subunit (pola1), mRNA	2	2563	2869	no	1	96	4482	MIIWTQIKIKIRKVERRLPMLEDWSWNPKLVSTTNSSCFWISTACTPLSFRNIISALQQCKERLLLHRKVKIRKKFQSYLILILKWGSYHERYGNWWRGGVT
LOC100486727	XM_002933613	14403	PREDICTED: Xenopus (Silurana) tropicalis homeobox protein ARX-like (LOC100486727), mRNA	1	651	954	no	3	65	1673	MRMMTMRRTRTRKRRRKKKTKQTNSITPITPATPTGRIYKSSSTHSSSRSSRSSSSLPPGAALTQSCPLRRNSCCTPQMLMAKTERIVCVCLRAATRRRAC
il1rapl1	XM_002933614	14414	PREDICTED: Xenopus (Silurana) tropicalis interleukin-1 receptor accessory protein-like 1-like (LOC100486886), mRNA	3	1457	1619	no	2	262	2350	MEITKILMHIYHIQKWILTIGTKKQGKKRGLPWKFCLICLKNIMGTSCLYPTEI
il1rapl1	XM_002933614	14416	PREDICTED: Xenopus (Silurana) tropicalis interleukin-1 receptor accessory protein-like 1-like (LOC100486886), mRNA	3	347	482	no	2	262	2350	MDVQTGLWIIKNIKSWWGNPCELNVHYFTATSEQTTLLHKVLDLA
LOC100487450	XM_002933618	14436	PREDICTED: Xenopus (Silurana) tropicalis dehydrogenase/reductase SDR family member on chromosome X-like (LOC100487450), mRNA	2	910	1171	no	1	81	1062	MHQSLQSWKESEAVICTMDKKQNLQTSHTTRICKENYGMKAARWLEFLVQHEALNGFHPVAADCVQCLLTLLCPLEFSLMHLNNRGE
wnt8a	NM_001017208	14444	Xenopus (Silurana) tropicalis wingless-type MMTV integration site family, member 8A (wnt8a), mRNA	1	378	510	no	3	32	1112	MTPEMAALVAEAGCGAAAVIMQNLESGSLNYSLMAWRRDKMPEP
LOC100492270	XM_002933634	14457	PREDICTED: Xenopus (Silurana) tropicalis glucosamine--fructose-6-phosphate aminotransferase [isomerizing] 2-like (LOC100492270), mRNA	2	967	1090	no	1	0	2553	MSMTIGKTKISGFQHWSRESFSSLKDHLHWFSRASIIQVKQ
LOC100492431	XM_002933635	14461	PREDICTED: Xenopus (Silurana) tropicalis A disintegrin and metalloproteinase with thrombospondin motifs 2-like (LOC100492431), mRNA	3	1679	1997	yes	2	94	3595	MGTGGSGASLALALAAVAQEYDIEPGAVTIHIQLMVVVPVVAQAMSYSCATLKTVKLILMTSGKSNVNNGIHTLNIRILNITGFHTITLMKKKDAIFTANQKKLAM
matr3	NM_001006791	14478	Xenopus (Silurana) tropicalis matrin 3 (matr3), mRNA	1	1023	1329	no	3	374	2924	MLRISMDCYQKITHMSVLYVICLFIQSRTGLNISVDQLTEDAASFFLKSILTGILKQDMASGVIRMCCISLLTQHQEFWDLHLPPYIWEVAKMEVEEVTEGT
LOC100497734	XM_002933647	14538	PREDICTED: Xenopus (Silurana) tropicalis vomeronasal type-2 receptor 26-like (LOC100497734), mRNA	1	687	1128	no	3	314	650	MLCFLCTLLFIGRPTQICCLLRQVTFGIVFTISVSSVLAKTLTVIIAFNATKPGRKLKKYVGTQLAIVLVIVCCLGEIIISTVWMASNPPLVEADMVSKMDTIVLLCNEGSVAFFFCIIGYIGTLALLSFIAAFLAKDFPDRFNEAX
cdh11	NM_001015858	14541	Xenopus (Silurana) tropicalis cadherin 11, type 2, OB-cadherin (osteoblast) (cdh11), mRNA	1	816	963	no	3	263	2645	MQMIQHMETALSLCIVFSKGNRIFQSKHKQESLGRLFQTWTEKPRKNIM
LOC100488776	XM_002933674	14591	PREDICTED: Xenopus (Silurana) tropicalis zinc finger protein SNAI3-like (LOC100488776), mRNA	2	493	751	yes	1	0	843	MGQHTDSSLASTVPKPTAASVHSRCIYEPTHCHVPVESVAKLFRGLGSYRDIFGPTQVKNHSHAFTVAVDLQTAPTCGLTCRHTQR
ctu2	NM_001039740	14601	Xenopus (Silurana) tropicalis cytosolic thiouridylase subunit 2 homolog (ctu2), mRNA	3	173	329	no	2	52	1600	MHSANPVSKNTLCTSSGPLLERTELSIQERRFSWLFPAVPPPVPWFSKFRRE
LOC100488940	XM_002933675	14614	PREDICTED: Xenopus (Silurana) tropicalis protein FAM38A-like (LOC100488940), mRNA	3	7277	7484	no	2	79	7510	MYLLSWSLGSLCAASSVKSLTPSCLRSCLVWIGFSSCARISMWCGSVGNWNWKRNSMQNSSSCIAHQKP
LOC100485376	XM_002933655	14628	PREDICTED: Xenopus (Silurana) tropicalis n-acetylgalactosamine-6-sulfatase-like (LOC100485376), mRNA	1	489	633	no	3	29	1589	MNGLGLLTVILDLMTINKGQISQCTETGTWWADIMKTLISIIKQESQI
LOC100485526	XM_002933656	14638	PREDICTED: Xenopus (Silurana) tropicalis protein CBFA2T3-like (LOC100485526), mRNA	3	1982	2237	no	1	537	2202	MQWLQHCPILWLLLPAQGLGETSPCVRSVPTSSIQCTTSLYYSSHTCGQSHCKQLCLPIWNPCHSTTAGYCLPLTYRLTLRQYTD
acsf3	NM_001127910	14640	Xenopus (Silurana) tropicalis acyl-CoA synthetase family member 3 (acsf3), nuclear gene encoding mitochondrial protein, mRNA	1	1551	1902	no	3	437	2171	MDPVCLVQLVTLCRGWKYVLLPRTHGKRAPPTLSMLMEILQAPWSLLVWRIEKGSFRFRGLQCSKNIGTNHMRRRKLLPQMAGLKQGIQLCIRTAHTGYWAGHLWTLLKVADIRSAP
LOC100489106	XM_002933676	14647	PREDICTED: Xenopus (Silurana) tropicalis cadherin-15-like (LOC100489106), mRNA	2	2161	2368	no	1	0	2364	MTDCKLLTQTQVFPHMTQLSFMTMKGRGRWLELSAPYCPVKRTVTRNMTICRNGGHASAGWQTCMGINX
mars	NM_001017000	14741	Xenopus (Silurana) tropicalis methionyl-tRNA synthetase (mars), mRNA	3	1553	1715	no	2	37	2752	MVSETRCSMSGLMLPLAIFLSQPTIQISGKSGGRVLNRSSFIISWQRTMFPFTV
kif5a	NM_001102745	14758	Xenopus (Silurana) tropicalis kinesin family member 5A (kif5a), mRNA	3	308	482	no	2	163	3262	MHLIGCFLRTQLRSKSIMPALCRLLKMCWQGIMGQSLLMGRPHLGRPTPWRENFMTHN
kif5a	NM_001102745	14760	Xenopus (Silurana) tropicalis kinesin family member 5A (kif5a), mRNA	3	764	962	no	2	163	3262	MSTVPVATASSLSILSKRTLRRSRSSVGSCTWLTWLEVKRSVRLELKVQFWMKPRISTNLCLLWEM
kif5a	NM_001102745	14762	Xenopus (Silurana) tropicalis kinesin family member 5A (kif5a), mRNA	3	3146	3278	no	2	163	3262	MWIMEMLQISMITEAICHVAVKLRISPSCSLFIRRQQPANNAVI
dtx3	NM_001123467	14767	Xenopus (Silurana) tropicalis deltex homolog 3 (dtx3), mRNA	1	702	858	no	3	68	1127	MGNWWVTSQKMVECWYPRTPVCCCLVMRNMGPLLSSMSSHQAFKGQSTPTLE
avil	XM_002933703	14858	PREDICTED: Xenopus (Silurana) tropicalis advillin-like (LOC100486464), mRNA	2	112	367	no	1	0	2457	MKVTATSCFIQRNLAVPYFMISTTGLERNLPRMSRAQWPYTLYSWMTTLEVAPCSTGRFKAMSLTALEVTSNKALFTKKGVLHLE
slc11a2	NM_001123466	14869	Xenopus (Silurana) tropicalis solute carrier family 11 (proton-coupled divalent metal ion transporters), member 2 (slc11a2), mRNA	1	1176	1401	no	2	112	1771	MFFWCSSSLHLGSGHSSSRTEFHNDWHILWAVCNGGFFELEMVSLCTSFFDPIYCYYPYSPCGHFSRCSASYRNE
slc11a2	NM_001123466	14871	Xenopus (Silurana) tropicalis solute carrier family 11 (proton-coupled divalent metal ion transporters), member 2 (slc11a2), mRNA	1	630	756	yes	2	112	1771	MGRSVDNNYRYIFLPFPGQIWSAQTGSIFWVPYYNYGTYIWV
csrnp2	NM_001126767	14882	Xenopus (Silurana) tropicalis cysteine-serine-rich nuclear protein 2 (csrnp2), mRNA	2	1105	1279	no	1	510	2070	MQRRSRNLELFAFQGKNVDVTAGCIVIQKLALVVRLESSARWIECPFHAAVLEMVAVI
tfcp2	NM_205827	14890	Xenopus (Silurana) tropicalis transcription factor CP2 (tfcp2), mRNA	3	749	1109	yes	2	148	1669	MEVRKVFPSEFRSTHLKKMRMESTQSIYTLPAVRSKSSSQKEQTESRKQTEKRWRRGHLRKRRNTSLPMKQPSSQSAHLGQKSPMCQMLHLQDLIAVTTVSQLGKGMAPQITSLSLLLPL
LOC496972	NM_001011481	14903	Xenopus (Silurana) tropicalis hypothetical LOC496972 (LOC496972), mRNA	1	438	591	no	3	5	800	MVLSWPTTMAALLQDGAEPALGEPLPLSCNRLLCLLSNTQLAPAAPGGAAL
LOC100135144	XM_002933691	14911	PREDICTED: Xenopus (Silurana) tropicalis hypothetical protein LOC100135144 (LOC100135144), mRNA	1	294	558	no	3	17	812	MMAQNSTSQYQGLCNMPTGTETMLLLGMILQCFIWPPVLPSTAMFNWPTCPLMVRSWPTTMPALLPDGAKPATMALLPPYSSRPLCPW
LOC100497888	XM_002933693	14922	PREDICTED: Xenopus (Silurana) tropicalis polypeptide N-acetylgalactosaminyltransferase 6-like (LOC100497888), mRNA	2	340	538	no	1	0	1866	MERNLKRTPGLRRRLKKKKKDLTSITLMHLPVIGFPFTERWALTPDLQCALSRSSSAALHCPQPAL
LOC100497888	XM_002933693	14923	PREDICTED: Xenopus (Silurana) tropicalis polypeptide N-acetylgalactosaminyltransferase 6-like (LOC100497888), mRNA	2	1024	1261	no	1	0	1866	MKPIPSRLLHLPEVCSPSPKPTLNTLAPMMKKWKSGEEKIWKCLLGSGSAAGSWKSFPALWLGMFSVQRVPILSPRVPR
LOC100486937	XM_002933705	14927	PREDICTED: Xenopus (Silurana) tropicalis polypeptide N-acetylgalactosaminyltransferase 6-like (LOC100486937), mRNA	2	913	1150	no	1	0	1758	MKPIPSRLLHLPVVCSPSPKPTLNTLAPMMKKWKSGEEKMWKCLLGSGSAAGSWKSFPALWLGMFSAQRVPILSPRVRR
slc4a8	XM_002933706	14930	PREDICTED: Xenopus (Silurana) tropicalis electroneutral sodium bicarbonate exchanger 1-like (LOC100487245), mRNA	2	166	286	no	1	0	3321	MKKKNLKGTGPCMWEFECHWGVRVIDITAPMDRNTGKEIE
slc4a8	XM_002933706	14934	PREDICTED: Xenopus (Silurana) tropicalis electroneutral sodium bicarbonate exchanger 1-like (LOC100487245), mRNA	2	313	562	no	1	0	3321	MMSLQLMIHHPSECSLSLGQRMMRNMYHMNFLLNWMRFVLKRVKMQSGKRQQGGLSLRKMLKMAANDGANPMWQLFPCIAFLN
scn8a	NM_001016886	14948	Xenopus (Silurana) tropicalis sodium channel, voltage gated, type VIII, alpha subunit (scn8a), mRNA	2	700	892	no	3	122	857	MELARFQRDNDGICDRVCGPWECLSAENIQSSPSFENYLCHSRCSVAWQNQHLKAFPPPLLTNQ
atf1	NM_001005828	14957	Xenopus (Silurana) tropicalis activating transcription factor 1 (atf1), mRNA	2	418	838	yes	1	222	1065	MAFCLVGHPTGKSLMICLRKMLGIENEMKTALVFLLLYLCHLVQLYTRQAQDSMLPLLQMEHFSLPLQVEMVCTVCRHCQWQMLVTLSQVLQYYSMPKLQMASRSLCLAIKWLYRLPQEICKPTRFVPPQPLLPFHRLWL
dip2b	XM_002933708	14966	PREDICTED: Xenopus (Silurana) tropicalis disco-interacting protein 2 homolog B-like (LOC100487550), mRNA	2	214	553	no	1	108	4797	MRKKEQNYWVRTSRKHKVLIQRYRKRIGTKQLDHLLLLRNRPLSTIEPDPEELEMSVTDQISIQKQSKRLWLSIKNRRWHYQCQPKGGQHLCSLQLTHVPLQIHPPHLRTKDP
larp4	NM_001142236	14973	Xenopus (Silurana) tropicalis La ribonucleoprotein domain family, member 4 (larp4), mRNA	3	893	1142	yes	2	40	2242	MDIARWIPVFTHSQFKPKHSLPHLYLCNLYIMLINSTPSITLCLRRGLQTQHLTLKHHWLHSKMGDLLMVLIHQELTKQVLLL
pfkm	XM_002933709	14978	PREDICTED: Xenopus (Silurana) tropicalis phosphofructokinase, muscle (pfkm), mRNA	2	2065	2242	no	1	0	2523	MRGAMTIIQQILYLICILKKEKVFLTAGRMSLVTCSRAEPLLPLIETLAQKWVQRPSFG
LOC100485161	XM_002933697	14981	PREDICTED: Xenopus (Silurana) tropicalis sentrin-specific protease 1-like (LOC100485161), mRNA	2	2050	2335	no	1	324	2187	MAVIVECLPASMQIISPKISLLPLHSVICRISERKWFGRSFIKNCFDINMEGLFEAWQFCWLQLWQVSQSRTRTKNYLISLHSQVYNCKIKLVLL
mthfd1	NM_001008006	14994	Xenopus (Silurana) tropicalis methylenetetrahydrofolate dehydrogenase (NADP+ dependent) 1, methenyltetrahydrofolate cyclohydrolase, formyltetrahydrofolate synthetase (mthfd1), mRNA	3	2630	2813	no	2	187	2989	MMWSFLLQIKSGLLHRKYMVQIILNSSLKHRRRLNYILNRDLAICQSAWLKPTCLYHIIQN
esr2	NM_001040012	15000	Xenopus (Silurana) tropicalis estrogen receptor 2 (ER beta) (esr2), mRNA	3	686	860	no	2	229	1873	MLVATPAQRETLTSALCAVIMPLDIITECGPVKAAKLSSREAFKDTMITSVQPRTNAQ
LOC100495737	XM_002933721	15094	PREDICTED: Xenopus (Silurana) tropicalis mitogen-activated protein kinase-binding protein 1-like (LOC100495737), mRNA	2	1090	1225	no	1	378	5127	MWHVERARNQTALSVLLPQGFCVNLMTRGYWTNGWSSGLLWQTAS
ehd4	NM_001102972	15120	Xenopus (Silurana) tropicalis EH-domain containing 4 (ehd4), mRNA	3	878	1058	no	2	376	1471	MTFVRSCSGLQNEWIALFCCSMLTNWIYQMSSPKQLEPSAVRMTKYEWYSIRLTRWTLSN
trappc6b	XM_002933722	15128	PREDICTED: Xenopus (Silurana) tropicalis trafficking protein particle complex 6B, transcript variant 1 (trappc6b), mRNA	2	28	163	no	1	6	498	MKPSFCFCTMRLYPVCIKPAVTRGMRKMESVLLNWRTWDFVLDKV
trappc6b	XM_002933723	15130	PREDICTED: Xenopus (Silurana) tropicalis trafficking protein particle complex 6B, transcript variant 2 (trappc6b), mRNA	2	7	142	no	1	0	393	MKPSFCFCTMRLYPVCIKPAVTRGMRKMESVLLNWRTWDFVLDKV
fbxo34	NM_001113148	15143	Xenopus (Silurana) tropicalis F-box protein 34 (fbxo34), mRNA	2	2179	2542	no	1	429	2475	MTFGLAILSGFRIRVTRTILANSARKSMQRGMSRCAGGIRNLTAKHYLTGLVIGCAATCLIKKAVAVRLGFMTIAGCLLATALIEPFAKNLKNLNLRKISVCFFFVFVCNLCLALCCLHCT
otx2	NM_001016177	15166	Xenopus (Silurana) tropicalis orthodenticle homeobox 2 (otx2), mRNA	1	936	1074	no	3	125	992	MLTAWIIKTKPLHGSSRFCEELSPLPLYLRQVENFAETFPALAQSG
exoc5	NM_001017342	15172	Xenopus (Silurana) tropicalis exocyst complex component 5 (exoc5), mRNA	3	1409	1529	no	2	136	2260	MPLSDVISFQIHQISQRTLLEYFPFLWIIYALNILIMHWK
myh4	NM_001001244	15194	Xenopus (Silurana) tropicalis myosin, heavy chain 4, skeletal muscle (myh4), mRNA	2	1267	1846	no	1	45	5850	MNLLPKDRLYHRSITLLVPCASLFLKSCSCGWSLVLTNSWILSNQDSSSLVCWTLLDLKSLILTAWSSSASTLPMKNCNSFSITTCSSWSRRNTRRKELIGSLLTSVWIWLPALSLLRSHWVSSPSLKRSACSPKPLILPSRTSYMSNIWANARTLRSPSLAKERLKLTSRLCIMLALWITTSVDGLKRTRTH
myh4	NM_001001244	15196	Xenopus (Silurana) tropicalis myosin, heavy chain 4, skeletal muscle (myh4), mRNA	2	4024	4264	no	1	45	5850	MPLLMLCNQLVMTVTCLENNLRKNRRPRLNFSAHCPKPMVKFHNGGPNMKLMQFSVLRNLKKPRRNLLSVYRTLRSKLRL
arid4a	XM_002933730	15218	PREDICTED: Xenopus (Silurana) tropicalis AT rich interactive domain 4A (RBP1-like) (arid4a), mRNA	3	911	1106	no	2	112	4024	MKSLNLPAVMKKMERMMLVTVIKTKKRRWKQSLKRRQIQQRGTSSFNNSTSLWKTEVLQSISHQY
daam1	XM_002933731	15239	PREDICTED: Xenopus (Silurana) tropicalis dishevelled associated activator of morphogenesis 1, transcript variant 1 (daam1), mRNA	2	280	508	no	1	186	3408	MTVTLPCSRWSQRCQCLLWRSWMPCLSNWWMNWTYQKSTGKPCLPCQLKRNGRSTAARKRITKKELQAGLSSTSIS
daam1	XM_002933732	15247	PREDICTED: Xenopus (Silurana) tropicalis dishevelled associated activator of morphogenesis 1, transcript variant 2 (daam1), mRNA	2	94	331	no	1	0	3201	MTVTLPCSRWSQRCQCLLWRSWMPCLSNWWMNWTYQKSTGKPCLPCQLKRNGRSTAARKRSNMITKKELQAGLSSTSIS
gpr135	XM_002933733	15262	PREDICTED: Xenopus (Silurana) tropicalis G protein-coupled receptor 135 (gpr135), mRNA	2	1693	1819	yes	1	396	1869	MGTDMGRAAGYPLVARPMVATWPCGPVKTRLCFFAEMASQTL
six6	NM_001100226	15305	Xenopus (Silurana) tropicalis SIX homeobox 6 (six6), mRNA	1	255	411	no	3	107	839	MSLSSELGLLWPFIRGTSGNSTTFWKITNLPRTRTPSCRLCGWRRITKKQRS
LOC100498150	XM_002933735	15314	PREDICTED: Xenopus (Silurana) tropicalis homeobox protein SIX4-like (LOC100498150), mRNA	2	2155	2287	no	1	51	2262	MWSAIWSIVAAKNLKLTKRTWPSSRMFKWMKICKIYNWRNSINF
LOC100494599	XM_002933757	15322	PREDICTED: Xenopus (Silurana) tropicalis voltage-dependent T-type calcium channel subunit alpha-1I-like (LOC100494599), mRNA	2	40	460	yes	1	0	7248	MEEGRKQSKAKVVRNIRRLYGKRRWKKMEERKWMIKGRSLLTAWKSQRQALPRLLSFGNQKPNHLVPGYKEWMLLILELQTSILHFPRMLLLLKRGALKQIWMCHTLTWPLWFSSASNRPPPYDTGASKWFVTLGSSVLA
atf4	NM_001004785	15328	Xenopus (Silurana) tropicalis activating transcription factor 4 (tax-responsive enhancer element B67) (atf4), mRNA	1	249	417	yes	2	367	1375	MALLQASHSSIAVYEEESSKLSSPVEFVILQKDEFVKRRDAVGGPSVPLQPVVFGG
smcr7l	NM_001030527	15330	Xenopus (Silurana) tropicalis Smith-Magenis syndrome chromosome region, candidate 7-like (smcr7l), mRNA	1	48	258	yes	1	312	1701	MAGWSREAVLLLYRTLLRQGRQLQFTDRDFYTSCVRREFRKHQNLTRLEDKEKQLEKGQFFLRTKLGGLV
mgat3	XM_002933748	15341	PREDICTED: Xenopus (Silurana) tropicalis beta-1,4-mannosyl-glycoprotein 4-beta-N-acetylglucosaminyltransferase-like (LOC100492491), mRNA	2	1540	1801	no	1	429	1938	MYMEWMASVCDGGSTTQCPTFDSMRTKLVTSWCSGLWEVHCTLQGGIALGASHQRASIINLSRHKMGISLDGGTMKTKETSITYVGS
rpl3	NM_001126603	15354	Xenopus (Silurana) tropicalis ribosomal protein L3 (rpl3), mRNA	2	352	475	no	1	18	1227	MNARGAFTRTGTNPRRRHSQSTARNGRMTRARSSWRRTLPA
gtpbp1	NM_001078704	15401	Xenopus (Silurana) tropicalis GTP binding protein 1 (gtpbp1), mRNA	1	480	624	no	3	11	2009	MWMLERVRFWEFLLMGNWTMGVVLQGKSFSATSMRLSLAAPAVLVMTS
polr3h	NM_001078929	15412	Xenopus (Silurana) tropicalis polymerase (RNA) III (DNA directed) polypeptide H (22.9kD) (polr3h), mRNA	3	404	563	no	2	91	712	MILLYLRSPCSNQQNLMRPNRYGYGNMRQRRVLMTCTWMWVRISDSEWWMRPL
hmcn1	XM_002933766	15445	PREDICTED: Xenopus (Silurana) tropicalis hemicentin-1 (hmcn1), mRNA	2	15583	15814	no	1	0	16266	MNAKMVPTCAKTIRSVKIPLVAIFILMNVKKEMYVSMNVEMFWEATSACVLLAISSWPMEKPVKILMNVLNKTFSVG
hmcn1	XM_002933766	15460	PREDICTED: Xenopus (Silurana) tropicalis hemicentin-1 (hmcn1), mRNA	2	13774	14215	no	1	0	16266	MLLCVMLNPVQSMACGVLGNPGVLAPRLVGKGRRCESGFAITPLLRLMACLVRDKTLRCKYVGTGNAQWMESGQHGVAGHPAAYRVEEAFDRELVHVPIQPHSMVAINVRATSMKMRCAMPIYVQFMVIGVHGVTGDPAVAPAMGVR
fmo5	NM_001015783	15489	Xenopus (Silurana) tropicalis flavin containing monooxygenase 5 (fmo5), mRNA	3	413	593	yes	2	19	1630	MESRTWASMMECCCAVGTIPSLICRWNPSQVLRSLKASTSTVENTSTLIYSRTRGSLSLA
rxrg	XM_002933753	15525	PREDICTED: Xenopus (Silurana) tropicalis retinoid X receptor, gamma (rxrg), mRNA	1	1383	1521	no	3	230	1634	MQRDCPTLQRLRHCVKKSMPLLNPTPNKSTQSSQEGSLNCCYVFQL
selp	XM_002933783	15550	PREDICTED: Xenopus (Silurana) tropicalis p-selectin-like (LOC100485005), mRNA	2	292	544	no	1	0	2367	MNPTTRRVMRTVWRCTSKGKKMAENGMMSLAEKKKWPCVTQLLVALPPAVGMGNASKQSTITPAVAMKDFMALHASTLWTVHAL
cnn3	NM_203926	15580	Xenopus (Silurana) tropicalis calponin 3, acidic (cnn3), mRNA	2	841	1045	no	1	60	1053	MALGGKYTIQSTALPPQNQSFIMEVKELEQMDLKSVIVITRLSILMNIRENTLMTILGITMASTVTRE
mtf2	NM_001015829	15658	Xenopus (Silurana) tropicalis MGC97722 protein (MGC97722), mRNA	1	852	1038	yes	2	181	1963	MVPRGLRAMLGKTYALWGQILYVYLFSLQFWTRIPQTSIFEMGRHSTPMLIQSKCYSQEEVL
mtf2	NM_001017339	15667	Xenopus (Silurana) tropicalis metal response element binding transcription factor 2 (mtf2), mRNA	3	929	1115	yes	1	258	2037	MVPRGLRAMLGKTYALWGQILYVYLFSLQFWTRIPQTSIFEMGRHSTPMLIQSKCYSQEEVL
rpl5	NM_203550	15674	Xenopus (Silurana) tropicalis ribosomal protein L5 (rpl5), mRNA	3	563	692	no	2	61	949	MEVYLFHTAPSVSLAMTLKAKNSMLRSTASTSLARTLPSTCAF
LOC100491941	XM_002933804	15680	PREDICTED: Xenopus (Silurana) tropicalis putative RNA polymerase II subunit B1 CTD phosphatase RPAP2-like (LOC100491941), mRNA	3	182	479	no	2	16	2659	MMFQKCIYWTLQNILPRPTIRTQWRKXPLSSYVDTLYAKIGLKMYQSRSIKFLQKQTKFMILLRESVSAAISVLEHPSIMKLSFPKPQCGCEMERAHLI
gpm6b	NM_001016378	15709	Xenopus (Silurana) tropicalis glycoprotein M6B (gpm6b), mRNA	1	582	708	no	3	47	785	MLYLEKHVGKLWNKSAIAMSSTCPITSLLWLVLELGQLSLPC
gpm6b	NM_001005011	15715	Xenopus (Silurana) tropicalis glycoprotein M6B (gpm6b), mRNA	3	824	947	no	2	232	1096	MLYLEKHVGKLWNKSAIAMSSTCPITSLLWLVLELGQLSLP
gpm6b	NM_001005011	15716	Xenopus (Silurana) tropicalis glycoprotein M6B (gpm6b), mRNA	3	995	1115	no	2	232	1096	MRAKCRSTKILRQKKSRSCKISSHGQKNSLTLTHKNDSPA
LOC100495795	XM_002933812	15733	PREDICTED: Xenopus (Silurana) tropicalis epidermal growth factor-like protein 6-like (LOC100495795), mRNA	2	145	301	yes	1	0	1563	MVSKPNAAMAGRETEKDNAKLYVSKAASMENAWDLTNANALLDLLERTAIKI
dmd.1	NM_001008054	15775	Xenopus (Silurana) tropicalis utrophin (utrn), mRNA	1	963	1089	no	3	167	2072	MTSAKAASFLAELQKVTKCTTQWLNIARLPHLEKMFGILQKF
dmd.1	NM_001008054	15776	Xenopus (Silurana) tropicalis utrophin (utrn), mRNA	1	678	816	no	3	167	2072	MMQFKFPDSWEKWPLLAAVTLNPVSEAAFSMLITNQKSKQLCFWIG
LOC100495158	XM_002933808	15780	PREDICTED: Xenopus (Silurana) tropicalis mitogen-activated protein kinase kinase kinase 7-interacting protein 3 homolog (LOC100495158), mRNA	2	304	637	no	1	177	2316	MWFLSACYRTTAILMLVIELLHKRVASTCIWNITIWMRHEGTVIFCTSTLVYIQVAHIIREMEHRLMDVHWFTAQVMDTLIHSTLQASFCVLFKSPSLLQLLWHKITIHSS
por	XM_002933818	15827	PREDICTED: Xenopus (Silurana) tropicalis NADPH--cytochrome P450 reductase-like (LOC100486781), mRNA	2	928	1069	no	1	297	2337	MMATWKKTLSHGGSSSGLQFVNTLELRQLEKIPAFVNMNLWCTQMRI
taf15	NM_001004806	15839	Xenopus (Silurana) tropicalis TAF15 RNA polymerase II, TATA box binding protein (TBP)-associated factor, 68kDa (taf15), mRNA	3	893	1022	yes	2	67	1570	MEANRIMMIRITLIITPYLSKAWVKMLHKIKFLTTSSRLALLR
ap2b1	NM_203875	15850	Xenopus (Silurana) tropicalis adaptor-related protein complex 2, beta 1 subunit (ap2b1), mRNA	3	851	1004	no	2	217	3070	MNALSGARSSSWTVYLIIILRMRGRRRVSVNVSLLGCLMPTLLWCCLLSKS
ulk2	XM_002933822	15869	PREDICTED: Xenopus (Silurana) tropicalis serine/threonine-protein kinase ULK2-like (LOC100487396), mRNA	1	2613	3015	no	3	1121	4247	MLKDMNLEAEILLGVLQYHSHSQRNLCWEPGCRVPPPLLTSTRINRNCANNIQILCVLPTLDKALATLLSLLGLSVLGLPLQSTWDRHRGAQNGCTKLHYLQLLDRQPRQLLHSRFLKPKHLQICLHWLIVRVP
usp32	XM_002933823	15886	PREDICTED: Xenopus (Silurana) tropicalis ubiquitin carboxyl-terminal hydrolase 32-like (LOC100487551), mRNA	2	1843	1981	no	1	180	4971	MRLFQSLCGEPCITGMGQTFPYHVQLSKTAKQIFQNLSFSHAICFS
usp32	XM_002933823	15888	PREDICTED: Xenopus (Silurana) tropicalis ubiquitin carboxyl-terminal hydrolase 32-like (LOC100487551), mRNA	2	3526	3865	no	1	180	4971	MPFGFRFPGLQVLFRHRKQVTMHKTVMIAWGISILSLCEWFRKMVIHVLLALGTGSVEGVKLNVLRIGLISAMHTLLWIGTPLHFIFATRHRKNGLLKSMRVLNRVVEHKLSL
usp32	XM_002933823	15889	PREDICTED: Xenopus (Silurana) tropicalis ubiquitin carboxyl-terminal hydrolase 32-like (LOC100487551), mRNA	2	457	604	no	1	180	4971	MKRRQNTFLVSFQMNLAAVLYERKWRACCAWWMEKFLCHLRNVLLRVKR
usp32	XM_002933823	15890	PREDICTED: Xenopus (Silurana) tropicalis ubiquitin carboxyl-terminal hydrolase 32-like (LOC100487551), mRNA	2	4573	4891	no	1	180	4971	MGLIMNKTHAAMGSWKTTQGKKRTALMTKEMTLAVNLFTTFMQFRAIQEYWVEVIMSLMPKIQMRNGTATMTAAARNCTLMKLTQTLRTSFSTNSKGWTMHNFCQR
bcas3	XM_002933825	15906	PREDICTED: Xenopus (Silurana) tropicalis breast carcinoma-amplified sequence 3-like (LOC100487875), mRNA	2	2107	2248	no	1	132	2904	MNFSLHFMQTIHCCWLQMWYSTISTYWLAWFHLEVLDQSQGMGPMTV
bcas3	XM_002933825	15908	PREDICTED: Xenopus (Silurana) tropicalis breast carcinoma-amplified sequence 3-like (LOC100487875), mRNA	2	415	619	no	1	132	2904	MGCRFGVYLSAVKLRNYSLLGTVLYDVLAYCHVPCLVLRCVIVSQKNDPCLECVKALVLVGPANLTAV
tbx2	NM_001035119	15911	Xenopus (Silurana) tropicalis T-box 2 (tbx2), mRNA	1	813	1038	no	3	362	2417	MTVVTNSIIPVGWWLARLTQRCPNACISTLIALPQESNGWPNPLLFTSSSSPIIYQTNMALPFLIPCISTSHGFI
LOC100488041	XM_002933826	15915	PREDICTED: Xenopus (Silurana) tropicalis t-box transcription factor TBX4-like (LOC100488041), mRNA	2	334	478	no	1	0	1623	MIIGTNFVTTNGWWLAKLNLQCLVVCMYIQIPLQLEHIGCGNWSHFRN
LOC100490132	XM_002933839	15925	PREDICTED: Xenopus (Silurana) tropicalis mediator of RNA polymerase II transcription subunit 13-like (LOC100490132), mRNA	1	6993	7113	no	3	905	7208	MCLQCNPMSCSIANTPTHWTPIRRQMCSGLFWNSTTPYPG
rnft1	NM_001016349	15942	Xenopus (Silurana) tropicalis ring finger protein, transmembrane 1 (rnft1), mRNA	3	1115	1259	no	1	81	1254	MSACVLRRMHFIVVQQRENVPALPDCDFQPESQMERWSHLSTTPNLLV
rps6kb1	NM_001039728	15944	Xenopus (Silurana) tropicalis ribosomal protein S6 kinase, 70kDa, polypeptide 1 (rps6kb1), mRNA	3	1061	1292	no	2	40	1603	MCRVTRFLDTSIGKNFWLVRWNLHLNRFCNLKRMSANLIRSLHDRPLWTVQMMPLSAKVPTRCLWVLPMWLPLYLKV
cltc	NM_001011039	15954	Xenopus (Silurana) tropicalis clathrin, heavy chain (Hc) (cltc), mRNA	1	3774	3903	no	3	203	5228	MDQIMLTFSRLVIAAMMKKCMMLLSSSITMFPILDAWHPLWFT
cltc	NM_001011039	15956	Xenopus (Silurana) tropicalis clathrin, heavy chain (Hc) (cltc), mRNA	1	4809	5010	no	3	203	5228	MLCSMPLNPKIQNWRRSFCSGFWLRIKRNALQPVSLPAMTCCDQMLSWKQHGGTTSWTLPCPTSFRS
rpl11	NM_001016640	16010	Xenopus (Silurana) tropicalis ribosomal protein L11 (rpl11), mRNA	1	357	519	no	3	5	536	MTQALVSMDWTSMWFLAGQDSALPTKNAREAQLEQSTVLEKRRQCAGSSKSTMA
LOC100495577	XM_002933851	16050	PREDICTED: Xenopus (Silurana) tropicalis zinc finger and BTB domain-containing protein 48-like (LOC100495577), mRNA	2	1258	1477	no	1	0	2100	MHAPRVGNAFLLGQNFGCMKPSSIVERSSLCVRNVGIGHPAGVGCKCTSKLNTETSGHIFANSATMHLLRKPI
dnajc11	NM_001079115	16059	Xenopus (Silurana) tropicalis DnaJ (Hsp40) homolog, subfamily C, member 11 (dnajc11), mRNA	1	717	939	no	2	16	1693	MFFHNKLRFAVFLSRYSARPDDHGSSESRQEHYGLHPVAMGDPVSDEHQYCPRHKEQPLHLGVSAWNSPFLHDG
camta1	XM_002933859	16068	PREDICTED: Xenopus (Silurana) tropicalis calmodulin-binding transcription activator 1-like (LOC100496936), mRNA	2	574	709	no	1	0	5094	MVLNGHATMGTAVQGFLWSSLFSRYSTVIRPNHSLGRTTVSALAT
camta1	XM_002933859	16070	PREDICTED: Xenopus (Silurana) tropicalis calmodulin-binding transcription activator 1-like (LOC100496936), mRNA	3	4727	4874	no	1	0	5094	MWQNEAKASDRFSCATETEKQFVNEKAGPGCAEDNEVFTSLPSQPSGGP
camta1	XM_002933859	16072	PREDICTED: Xenopus (Silurana) tropicalis calmodulin-binding transcription activator 1-like (LOC100496936), mRNA	3	584	719	no	1	0	5094	MDMQQWEQQFRVFCGAACSADTRQSSDQTTASDAQLSLHWQLRCR
wrap73	NM_203697	16091	Xenopus (Silurana) tropicalis WD repeat domain 8 (wdr8), mRNA	3	680	809	no	2	52	1405	MGVCCHPIVRMSGRLGSNLWHGVPRVSFLQLEALMRRSVSLTM
igf2r	XM_002933871	16128	PREDICTED: Xenopus (Silurana) tropicalis insulin-like growth factor 2 receptor (igf2r), mRNA	2	6931	7324	no	1	0	7776	MGISKDQLVLLGMSSITLMMMIWMLCSLLTLSVAKISQKMLQPPSCSTAVRLSGREGQNSSTKRPIVNTCLLGILPPSAPWCLMAIQAVSRTTRACLAGAKLWVPFSAYYWLFLLYACWCSCCTRKKEEKV
igf2r	XM_002933871	16135	PREDICTED: Xenopus (Silurana) tropicalis insulin-like growth factor 2 receptor (igf2r), mRNA	2	2404	2524	no	1	0	7776	MAACMSLSGTLLEPVYCPKLKVKTAKFLMLWQGIPMTSHL
LOC100487937	XM_002933863	16147	PREDICTED: Xenopus (Silurana) tropicalis mu-type opioid receptor-like (LOC100487937), mRNA	2	1009	1168	no	1	0	1164	MLFLMKTLRGASENFAFLHHQPLSSRTPPVCGTIHVTVPPLPIRWTGLIIRYX
LOC100487937	XM_002933863	16148	PREDICTED: Xenopus (Silurana) tropicalis mu-type opioid receptor-like (LOC100487937), mRNA	3	98	326	no	1	0	1164	MSGWRHGQLEQTGRQPVILVQPVRDFPGGQRFHYYSHHHHRSLLHDLCDGTLWQRLGHVCHCQVHENEDCNQHLHF
ampd3	NM_001030516	16160	Xenopus (Silurana) tropicalis adenosine monophosphate deaminase 3 (ampd3), mRNA	1	93	300	no	3	35	2378	MRWTNKCGFWPRKYSPKFSEKRTAKMPSLYSLSPRTVPLGRRRPRNGSWRRNSRSRSRRRLLKGRKALR
map4k3	NM_001130347	16184	Xenopus (Silurana) tropicalis mitogen-activated protein kinase kinase kinase kinase 3 (map4k3), mRNA	1	2019	2148	no	3	164	2798	MQDKCRNSPFRSQHISFLTGSCLGSLPFPQKSLIQNGVRSAVL
map4k3	NM_001130347	16185	Xenopus (Silurana) tropicalis mitogen-activated protein kinase kinase kinase kinase 3 (map4k3), mRNA	2	2407	2533	yes	3	164	2798	MVHRNRYSAVRCCTCDTAGARHHSCLPGPLYKDCKSSGKTEI
LOC100488827	XM_002933868	16213	PREDICTED: Xenopus (Silurana) tropicalis methionine synthase-like (LOC100488827), mRNA	3	3491	3623	no	2	151	3949	MRNKEMTTAASWPKHWEIGWLRPLQRNFTRESGKTYGVTVVRSN
srsf7	NM_001007486	16248	Xenopus (Silurana) tropicalis serine/arginine-rich splicing factor 7 (srsf7), mRNA	1	243	723	no	3	41	743	MERLFVGPELEWSFQPACHGDLVMIDLQHVAHLIQVIVAMNVERRDIMPMIVKDIADAEGAGQGLGLTQDLGEEDIPVHVAEAVEEGLGLLLLAVQDLHHHADPGMPPHVVLGLALLKDPGLYPGLVQDPDRCHVQEADQSPDLHPQKEVAHHPEVRKEA
actn2	NM_001005053	16273	Xenopus (Silurana) tropicalis actinin, alpha 2 (actn2), mRNA	3	1061	1211	yes	1	177	2859	MDSTDYSLVGKPHIREDHASHAEETGGFQRLSSQTQATKGAGEMSARDQL
atp13a1	NM_001128040	16301	Xenopus (Silurana) tropicalis ATPase type 13A1 (atp13a1), mRNA	1	393	660	yes	3	14	3536	MEKKTSSLNSRRSNIHMMQRRRRDSSKLCFLWNASFPITRMLKVTWKMWILKLLKRNTELTKQKWLFQISYIFSKSEQSPPSSFSRCFV
LOC100495415	XM_002933892	16306	PREDICTED: Xenopus (Silurana) tropicalis histone H2B 1.1-like (LOC100495415), mRNA	3	227	377	no	2	22	400	MCSSASQGKPPAWLITTSAPPSPPGRSRPRSACCCLGSWPSTLCPRGQRL
wdr1	NM_001006780	16314	Xenopus (Silurana) tropicalis WD repeat domain 1 (wdr1), mRNA	3	722	1067	no	2	124	1945	MEVDLPLLVLMGRFSFMMGRPAKRLAILEEVKHTMVAFMRLAGVLTAPNCFLHLVTKRQRSGTLLLILQSLHFILAQKYWTSSWAVCGKRTTCCLFHFPVTSIIWTKIILPGHYV
wdr1	NM_001006780	16316	Xenopus (Silurana) tropicalis WD repeat domain 1 (wdr1), mRNA	3	410	608	no	2	124	1945	MSTSHLQERLKISLGLRIARESLWWVKAGKSLALSFFGTLAPQLEKLVATSKSSTLWTSNRQGRTV
LOC100495578	XM_002933893	16318	PREDICTED: Xenopus (Silurana) tropicalis histone H2B 1.1-like (LOC100495578), mRNA	3	227	377	no	2	22	400	MCSSASQGKPPAWLITTSAPPSPPGRSRPRSACCCLGSWPSTLCPRGQRL
ret	XM_002933895	16322	PREDICTED: Xenopus (Silurana) tropicalis proto-oncogene tyrosine-protein kinase receptor Ret-like (LOC100495902), mRNA	2	1987	2143	no	1	492	3669	MKIIVPDPVQRASRSLNVRSVGDWAPSLEGVSGDRDMEKGSQQTILPARLVF
csgalnact2	NM_001102722	16330	Xenopus (Silurana) tropicalis chondroitin sulfate N-acetylgalactosaminyltransferase 2 (csgalnact2), mRNA	2	1510	1663	no	2	373	1507	MQNLVRKFSTLWCLACIILLLFTQTKRYLLLWSSSWCIRRILVSGGILALV
tbx18	XM_002933925	16412	PREDICTED: Xenopus (Silurana) tropicalis t-box transcription factor TBX18-like (LOC100489044), mRNA	2	1330	1576	no	1	0	1734	MTMKLLDVPKQVYQCRFLECLHSSNTSCLLQQVMRLVAANHTKALIMHLDYTAHVLCMGTTFLHHQNWPLALKRFSLHKEVF
syncrip	XM_002933928	16426	PREDICTED: Xenopus (Silurana) tropicalis synaptotagmin binding, cytoplasmic RNA interacting protein (syncrip), mRNA	2	871	1018	yes	1	0	2310	MEVHLQILCILDSSHQLEQKFLWGKSLEISLKMSLSRYLKKLDQYGISA
syncrip	XM_002933928	16427	PREDICTED: Xenopus (Silurana) tropicalis synaptotagmin binding, cytoplasmic RNA interacting protein (syncrip), mRNA	2	1723	2122	no	1	0	2310	MMNIIIMVAHICHLPPEVEAVEAEVVMDILLTIMAMMITMTIMAMITIITVVDMTILSMVTKTFKSELEAGVVEEQGVLLHPEVAGPFLPVAEPVIHREEVQDQQEVLEVREEVPSNKEAAGYVVRGVAAVEM
syncrip	XM_002933928	16428	PREDICTED: Xenopus (Silurana) tropicalis synaptotagmin binding, cytoplasmic RNA interacting protein (syncrip), mRNA	2	1117	1237	no	1	0	2310	MRSDLESTLVCVSLLPITDSLLGQFQKVKPRNKLLKNLAK
syncrip	XM_002933928	16429	PREDICTED: Xenopus (Silurana) tropicalis synaptotagmin binding, cytoplasmic RNA interacting protein (syncrip), mRNA	2	2143	2377	no	1	0	2310	MGTTSQIPSGARPIIRTGAPNPLLSNRSKVVIILVTMVTNLKTRSFIRILLGNSGNRKLGILLNNRLIGLSGTDWPKI
LOC100488401	XM_002933921	16445	PREDICTED: Xenopus (Silurana) tropicalis gap junction beta-7 protein-like (LOC100488401), mRNA	1	159	294	no	3	53	794	MSLLQKLCGKMNRKNLSATSDSPGAKMSALISSSPSPRCAFGLYS
akirin2	NM_203583	16456	Xenopus (Silurana) tropicalis akirin 2 (akirin2), mRNA	3	794	1004	no	1	252	795	MSRSLPFSAAVFPYLLQDVLVKNCSNAIFPFPLNTGYFKLLSVATTLTQQLVLECSLMSVPLGVDLCYLY
LOC100490017	XM_002933930	16458	PREDICTED: Xenopus (Silurana) tropicalis hyaluronan and proteoglycan link protein 1-like (LOC100490017), mRNA	2	1087	1213	no	1	0	1266	MQHGNSLLMTAVMAAGWPMAASAILSQGQEDVAAPMRLQYAL
LOC100490017	XM_002933930	16459	PREDICTED: Xenopus (Silurana) tropicalis hyaluronan and proteoglycan link protein 1-like (LOC100490017), mRNA	2	310	460	no	1	0	1266	MKMDHGLLWRWSKQKSFPIVVATLHCLANFSMSQLLLARPLTKSESSGPN
edil3	NM_001100213	16463	Xenopus (Silurana) tropicalis EGF-like repeats and discoidin 1-like domains 3 (edil3), mRNA	3	545	812	yes	2	286	1732	MVEYVKSVKLIEEIPSLDMFVNVHMVSMEFTANTMLMNVRLSLARMEVYAQIWLPTTRVNALVNTWEETANTDVLDLLVWKVELYQTNR
edil3	NM_001100213	16464	Xenopus (Silurana) tropicalis EGF-like repeats and discoidin 1-like domains 3 (edil3), mRNA	3	359	494	no	2	286	1732	MCVTQTHVKMGESVCQAYLMSPFHVSAQLASVISTVLVLWRLMQK
edil3	NM_001100213	16465	Xenopus (Silurana) tropicalis EGF-like repeats and discoidin 1-like domains 3 (edil3), mRNA	3	1493	1628	no	2	286	1732	MCSLWVPIKLLIVTMENTGQCIRMENKGKTRFFKVILTMILTERM
mef2c	NM_001112916	16494	Xenopus (Silurana) tropicalis MADS box transcription enhancer factor 2, polypeptide C (myocyte enhancer factor 2C) (mef2c), mRNA	1	1824	2085	no	3	332	1628	MRSAEIIRLALEPYNRELVQNRFGSSLLFSLLCSLCKMYVTIDSVMLQVQRYLHVNRQRKLFARMWQTFTEEESSCYATYGQKCTEV
LOC100495308	XM_002933934	16499	PREDICTED: Xenopus (Silurana) tropicalis neurexophilin-2-like (LOC100495308), mRNA	1	1113	1260	no	3	545	1334	MRKLTEPRKRPCVTSIRQRSATKSRRRATCPGCVLNHSKSFVFILLFSA
LOC100497988	XM_002933950	16501	PREDICTED: Xenopus (Silurana) tropicalis speckle-type POZ protein-like (LOC100497988), mRNA	2	265	415	no	1	0	1110	MKRQKQWKAREPIALFRAKTGVLRNTLGEIFYLTKLMVCYQMISLHCTVR
thsd7b	XM_002933951	16508	PREDICTED: Xenopus (Silurana) tropicalis thrombospondin type-1 domain-containing protein 7B-like (LOC100498151), mRNA	2	3430	3607	yes	1	345	5034	MGGALAPNWILRIRLRCMRQCHAIMSAVSIPGWQSRGLLASSTPRRDPLPAAMEYKSGK
dars	NM_203975	16519	Xenopus (Silurana) tropicalis aspartyl-tRNA synthetase (dars), mRNA	3	857	1007	no	2	70	1663	MCSPFPTLKPAPTWHSPRSCTSRCASVLTLRKSSALGQCSVQKTQTPTGI
mcm6.2	NM_204062	16522	Xenopus (Silurana) tropicalis minichromosome maintenance complex component 6 (mcm6.2), mRNA	2	1411	1567	yes	1	48	2517	MEFAASMSLTRWTQRTKWLSMRQWNSKPFQLPKLVLRLRSMLALPSSLQQTL
vil1	NM_001102897	16554	Xenopus (Silurana) tropicalis villin 1 (vil1), mRNA	2	1927	2143	no	1	117	2589	MLTIKDCRRKLWTLPHGSLSAPTRPENLLQRRFQISTKMTWMKMMFSCSMHGIRFSCGLGKILTRQRRRKPP
LOC100485110	XM_002933954	16575	PREDICTED: Xenopus (Silurana) tropicalis zinc finger protein 142-like (LOC100485110), mRNA	2	4825	5389	no	1	135	5892	MSACSASFPATALPLSDATSRSITSSWTVPSASRLSAADKIWKSTANLILPITATCASMPPKIGNSSCIIMRRNTRRQLCPVLSKKWGFSAARSVPSPAVTSWYTTITLKAMEAYGFTSAQTVNIPPRTSRRSLGTAASTRVKNPTNATSVAMPAPTLHASSTICASIRMRRSTCVLSAATSANGLTS
ihh	XM_002933942	16622	PREDICTED: Xenopus (Silurana) tropicalis Indian hedgehog homolog (ihh), mRNA	1	1104	1266	yes	3	713	1649	MATIRKSPCTTRAAPSTSPRRTGIAINTGCWQGWQWKLDSTGSIMSPKPISIAQ
ihh	XM_002933942	16623	PREDICTED: Xenopus (Silurana) tropicalis Indian hedgehog homolog (ihh), mRNA	1	861	1005	no	3	713	1649	MCPRKPWGPAAGTRGRFPATPSASRNSPPTTTRTLYSTTRRIRGRTGS
LOC100497157	XM_002933946	16659	PREDICTED: Xenopus (Silurana) tropicalis tubulin alpha-1D chain-like, transcript variant 2 (LOC100497157), mRNA	2	292	523	no	1	66	1419	MRFGPVPTGSFSTLSNSSQARKMPPITTPAAITPSARRSLTWCWTGSASWRISAQDSRASSSSTASGGALALDSPPC
LOC100497157	XM_002933946	16660	PREDICTED: Xenopus (Silurana) tropicalis tubulin alpha-1D chain-like, transcript variant 2 (LOC100497157), mRNA	2	88	286	no	1	66	1419	MWGRQECRLAMHAGSCTAWNMGSNRTARCPATKPLGEGTIPSTPSSVRPEPGSTSPALCLWTWSPL
LOC100497157	XM_002933945	16664	PREDICTED: Xenopus (Silurana) tropicalis tubulin alpha-1D chain-like, transcript variant 1 (LOC100497157), mRNA	2	445	676	no	1	219	1572	MRFGPVPTGSFSTLSNSSQARKMPPITTPAAITPSARRSLTWCWTGSASWRISAQDSRASSSSTASGGALALDSPPC
LOC100497157	XM_002933945	16665	PREDICTED: Xenopus (Silurana) tropicalis tubulin alpha-1D chain-like, transcript variant 1 (LOC100497157), mRNA	2	241	439	no	1	219	1572	MWGRQECRLAMHAGSCTAWNMGSNRTARCPATKPLGEGTIPSTPSSVRPEPGSTSPALCLWTWSPL
LOC100486621	XM_002933963	16673	PREDICTED: Xenopus (Silurana) tropicalis striated muscle-specific serine/threonine-protein kinase-like (LOC100486621), mRNA	2	4699	4819	no	1	0	11028	MPGSTKVSSQTKWGKQPAMRTCMSQIWYPLLQMVPPSLPL
tuba1a	NM_203798	16683	Xenopus (Silurana) tropicalis tubulin, alpha 1a (tuba1a), mRNA	1	66	264	no	3	44	1397	MWGRQECRLAMHAGSCTAWNMGSNRTARCPATKPLGEGTIPSTPSSVRPEPGSTSPALCLWTWSPL
tuba1a	NM_203798	16684	Xenopus (Silurana) tropicalis tubulin, alpha 1a (tuba1a), mRNA	1	270	501	no	3	44	1397	MRFGPVPTGSFSTLSNSSQARKMPPITTPAAITPSARRSLTWCWTGSASWRISAQDSRASSSSTASGGALALDSPPC
des.1	NM_203803	16686	Xenopus (Silurana) tropicalis desmin, gene 1 (des.1), mRNA	1	1209	1353	no	3	50	1424	MWKLPHTVNCSRARRAGSLFPSKHTLHSVSEKPAQSRELQKSTQRKQS
LOC100486782	XM_002933964	16710	PREDICTED: Xenopus (Silurana) tropicalis tubulin alpha-1D chain-like (LOC100486782), mRNA	2	586	793	yes	1	0	1014	MVNTWLVVCCTVVMWCPKMSMLLLPPLRPSAPSSLWTGAQLVSRLVSTTSPQLWFRVGIWPRYSELCAC
LOC100497528	XM_002933947	16712	PREDICTED: Xenopus (Silurana) tropicalis tubulin alpha-1 chain-like (LOC100497528), mRNA	2	16	184	no	1	180	405	MWCPKMSMLLLPPLRPSAPSSLWTGAQLVSRLVSTTSPQLWFRVGIWPRYSELCAC
tuba4b	NM_001016694	16715	Xenopus (Silurana) tropicalis tubulin, alpha 4b (tuba4b), mRNA	2	229	397	no	1	177	1524	MHAGSCTAWNMGSNRTARCPATKPLVEGTILLPPSSVRPEPGSTSPALCLWTWSPL
tuba4b	NM_001016694	16717	Xenopus (Silurana) tropicalis tubulin, alpha 4b (tuba4b), mRNA	2	403	583	no	1	177	1524	MRCGQAHTGSSSIQSNSSQARKMPPITTPGGITPSARRSLTQFWTESASWRISARDCRAF
tuba4b	NM_001016694	16718	Xenopus (Silurana) tropicalis tubulin, alpha 4b (tuba4b), mRNA	2	1102	1309	yes	1	177	1524	MVNTWLVACCTAVMWCPKMSMLLLLLSRPNVPSSLWTGAQLVSRLVSTTSPQQRFRVGIWPRYSELCAC
LOC100497686	XM_002933948	16732	PREDICTED: Xenopus (Silurana) tropicalis autophagy-related protein 9A-like (LOC100497686), mRNA	1	2019	2175	no	3	452	2978	MSVSMEIPRGCLQARLKRPCTNRQRMGRRSSRSCTLLLPTLAGSLLGNAQPF
LOC100490304	XM_002933972	16768	PREDICTED: Xenopus (Silurana) tropicalis gamma-crystallin-4-like (LOC100490304), mRNA	3	74	296	no	2	25	550	MSAAQSVLTCPLTSVAATLSGWTVGTGSCMSTPVTGDTSIISGKENTQTFRDGWASMTTSGPAALFPITRVNIK
LOC100492112	XM_002933983	16770	PREDICTED: Xenopus (Silurana) tropicalis gamma-crystallin-4-like (LOC100492112), mRNA	3	74	296	no	2	25	826	MSAAQSVLTCPLTSIAATLSGWIVGTGSCMRTPVTGDTSIISGKENTQTFRDGWASMTTSGPAALFPITRVNIK
LOC100490647	XM_002933974	16772	PREDICTED: Xenopus (Silurana) tropicalis gamma-crystallin-4-like (LOC100490647), mRNA	3	65	287	no	2	16	541	MSAAQNVLTCPLTSVAVTLSGWTVGTGSCMRTPVTGDTSIISGKENTQTFKDGWASMTTSGPAALFPITRVNIK
LOC100490478	XM_002933973	16774	PREDICTED: Xenopus (Silurana) tropicalis gamma-crystallin-4-like (LOC100490478), mRNA	3	74	296	no	2	25	550	MSAAQSVLTCPLTSIAATLSGWIVGTGSCMSTPVTGDTSIISGKENTQTFRDGWASMTTSGLVVLFLTTRVNIK
LOC100492272	XM_002933984	16776	PREDICTED: Xenopus (Silurana) tropicalis gamma-crystallin-4-like (LOC100492272), mRNA	3	74	539	no	2	25	1051	MSAAQSVLTCPLTSVAATLSGWTVGTGSCMRTPVTGDTSIISGKENTQTFRDGWASMTTSGPAALFPISSSTRRETSKAAAMSAAQSVLICPLTSVAATLSGWTVGTGSCMRTPVTGDTSIISGKENTQTFRDGWASMTTSGPAALFPITRVNIK
LOC100490987	XM_002933976	16780	PREDICTED: Xenopus (Silurana) tropicalis gamma-crystallin-4-like (LOC100490987), mRNA	1	72	294	no	3	23	548	MSAAQSVLTCPLTSVAATLSGWTVGTGSCMRTPVTGDTSIISGKENTQTFRDGWASMTTSGPAALFPITRVNIK
rad23b	NM_001030407	16830	Xenopus (Silurana) tropicalis RAD23 homolog B (rad23b), mRNA	2	1471	1711	no	1	273	1521	MRIWLPTSFYSKTLMMIEKKRLYFLYLTSHQCITLTLLTGFTRMIWVHIHNIRCMVVTGGGRAREILEKLGNENAYNCFN
LOC100492944	XM_002933988	16840	PREDICTED: Xenopus (Silurana) tropicalis zinc finger protein 462-like (LOC100492944), mRNA	3	4883	5234	no	2	598	6508	MKQHYIRVVRKRQLWDTNASSVWKSTQHSEPSATIFANMFNMEMSPNFLLPCKVYALMKEATWHWLCSLEMINTAASSVPLSLPSGTIWIVTSRLIMDIINLSDANCALSSLPITAD
LOC100492944	XM_002933988	16844	PREDICTED: Xenopus (Silurana) tropicalis zinc finger protein 462-like (LOC100492944), mRNA	3	5669	5834	yes	2	598	6508	MEGKNSSSAKTAPSTLALNRLLLCMLKLDILLLLWKDPKIYAALSACTIPNISTT
abca1	XM_002933982	16866	PREDICTED: Xenopus (Silurana) tropicalis ATP-binding cassette sub-family A member 1-like (LOC100491942), mRNA	2	145	364	no	1	0	6792	MSNMNAIFQIRRCHQQEPCRGFRALFAMPIIHAFVTQPLENHQELWEILIDPLSPVCLPTQGNCCYTVTRTPV
abca1	XM_002933982	16868	PREDICTED: Xenopus (Silurana) tropicalis ATP-binding cassette sub-family A member 1-like (LOC100491942), mRNA	2	3067	3367	no	1	0	6792	MMWGSLIKRSTKQVSCQEACRENFPWPWPLLVDQRLSFWMSPQLELIHILAGASGSCLSNTDKEELLSYQPIIWMKQTSLETGLLLFPTESCAVWDPRFS
abca1	XM_002933982	16869	PREDICTED: Xenopus (Silurana) tropicalis ATP-binding cassette sub-family A member 1-like (LOC100491942), mRNA	2	1702	1828	no	1	0	6792	MWREPTRLRMGTGIPVLVLTHLKTCDTSGEDFLTFKMLLNRL
LOC100496613	XM_002933991	16880	PREDICTED: Xenopus (Silurana) tropicalis pro-neuregulin-1, membrane-bound isoform-like (LOC100496613), mRNA	1	1077	1200	no	2	505	2554	MLRQRKDLLCQRRRVLCPQWYNKQQPVHVQVQTWIHWSKMH
psd3	XM_002934005	16886	PREDICTED: Xenopus (Silurana) tropicalis PH and SEC7 domain-containing protein 3 (psd3), mRNA	2	2131	2398	no	1	0	2868	MLMKSPMVHSQRVLIELAAVIHFWKFPMIQMLQYTRLVSLLGKYTQTWMERRLQEENEAGKHFMLYLKEQSCICKRMNINLKRHCRKMI
psd3	XM_002934005	16887	PREDICTED: Xenopus (Silurana) tropicalis PH and SEC7 domain-containing protein 3 (psd3), mRNA	2	1084	1324	no	1	0	2868	MKVWTMIFIKESDHVLELWLKRSLMMYLRQKDAQKILLTCIAPSLRTYWIIHPCIIVWSPLTHCTMNLIVSLVLRCRLLQ
paqr3	NM_001016135	16932	Xenopus (Silurana) tropicalis progestin and adipoQ receptor family member III (paqr3), mRNA	1	684	990	yes	2	91	1024	MAQAALCYILLCVWLWNHSYSALDLVKWRCWNFDCPRICSTSNCHVHHCSGCFSILHFKSARKIFSRTAELPWLKPSTVAYTCSRNVVLVASVDSVHHAIQT
kcmf1	NM_001122807	16946	Xenopus (Silurana) tropicalis potassium channel modulatory factor 1 (kcmf1), mRNA	3	1184	1391	no	1	39	1182	MTSPFADNVLCAVTANESGQTTIFGFVLVIVISGLSLLLHCVHSKKEKKGKKKKKRQIYTIIHLTNFYF
dnaja1	NM_001011012	16955	Xenopus (Silurana) tropicalis DnaJ (Hsp40) homolog, subfamily A, member 1 (dnaja1), mRNA	1	246	450	no	3	128	1328	MKVKSSNRFPRLMKCSLIPRKETCMIKAVNRQLKREAWEVAVLHHQWISLTCFLVAVEECNEREEVKT
b4galt1.2	NM_001016664	16961	Xenopus (Silurana) tropicalis UDP-Gal:betaGlcNAc beta 1,4- galactosyltransferase, polypeptide 2 (b4galt2), mRNA	3	716	881	no	2	307	1393	MHCRKWPSSYLLEIVMNTLSTGCIICIQFSRDSSLIMGCMLSIKMVTKLSIGPNC
nbea	XM_002934020	17020	PREDICTED: Xenopus (Silurana) tropicalis neurobeachin-like (LOC100490814), mRNA	1	7053	7272	no	3	263	8819	MQSAMKPGRMIRPRPITTTPITPPPCLHYVGLYELSLSLHFSSMPTTVNLTIQIGRFPRLQDRGETAKETHQM
nbea	XM_002934020	17022	PREDICTED: Xenopus (Silurana) tropicalis neurobeachin-like (LOC100490814), mRNA	1	6528	6834	no	3	263	8819	MRKTRPSKRSTQRFLVTQKVYMENGCSAKSELYSPGDISCKILHWRCLWQTALLLCSIFRIRPLLRKLYTAYLVLEWVPVMVYLKPGEYHWPLPGSCLNPPT
mab21l1	NM_001079329	17032	Xenopus (Silurana) tropicalis mab-21-like 1 (mab21l1), mRNA	1	744	1068	no	3	248	1325	MWYRSPPPSSAPASGPAALPTGPCPTSPGPGPTGWQKSRPRASTCSPRSATRWRASRARPRVTPGCCSSPRPRIACSWAAVGRNASPYSKPCGTGTWSCPGSRSITTT
stard13	NM_001045767	17044	Xenopus (Silurana) tropicalis StAR-related lipid transfer (START) domain containing 13 (stard13), mRNA	3	1043	1322	no	2	94	3229	MTSIRKKTWLYIFQRITNLERFQKHFLLKASLPQRTSMVSTGGVEGFLLAGRKVFVLKNQELCLPGAPEVAGLVFMITCPDPTCMPAPGISWI
fry	XM_002934024	17090	PREDICTED: Xenopus (Silurana) tropicalis protein furry homolog (LOC100491492), mRNA	1	7992	8121	no	3	125	8999	MMPRKPGAVTSTSSCQTQMDPVLSTPSMCFPPCLRVSRRDSVS
fry	XM_002934024	17094	PREDICTED: Xenopus (Silurana) tropicalis protein furry homolog (LOC100491492), mRNA	1	7371	7494	yes	3	125	8999	MERGKAWTISTGEFAGVPWTAWISAICSSWRRASSQEALTV
LOC100490648	XM_002934019	17179	PREDICTED: Xenopus (Silurana) tropicalis homeobox protein 8-like (LOC100490648), mRNA	3	365	623	no	1	3	816	MDEIYQIPHLERTVDRWIIHNGTRGEQKNKDSLHKSPAAGAREGVPLQQIHLETTESRAGSHAEPDRETHKNLVPEPKNEVEEGGR
LOC100497737	XM_002934050	17275	PREDICTED: Xenopus (Silurana) tropicalis tumor protein 63-like (LOC100497737), mRNA	2	1084	1216	yes	1	0	2142	MVRCWVDGVLRLVYALVQAEIARQMKTASENSKFPTAQRMEKVC
lpp	NM_001113876	17284	Xenopus (Silurana) tropicalis hypothetical protein LOC100135172 (LOC100135172), mRNA	3	1244	1367	no	2	250	1393	MCSVTAVRTVGVSCLKGRIKAATPWMGTSYARPAMLHVFRL
lpp	NM_001113876	17285	Xenopus (Silurana) tropicalis hypothetical protein LOC100135172 (LOC100135172), mRNA	3	1085	1223	no	2	250	1393	MGFLSLSMLLDRFIALRISIRNLLPGVLCVRNPLCLLLARRRPYVL
masp1	NM_001097405	17300	Xenopus (Silurana) tropicalis mannan-binding lectin serine peptidase 1 (C4/C2 activating component of Ra-reactive factor) (masp1), mRNA	2	1948	2140	no	1	93	2244	MSSFQWCFMKCVRKAMNPAQEIIVLQKICFVLVIMKAGKTPVLGTVEVHLLCRTLTQSVGWHRG
LOC100496938	XM_002934045	17316	PREDICTED: Xenopus (Silurana) tropicalis choline-phosphate cytidylyltransferase A-like (LOC100496938), mRNA	1	546	732	no	3	5	1205	MHRGHLAQSFWRNTELILLHMMISLTLLREVMMFISTLKMQECLLQHSGQRESPPLTLLQEL
madd	NM_001079249	17371	Xenopus (Silurana) tropicalis MAP-kinase activating death domain (madd), mRNA	3	1502	1778	no	2	94	4684	MHRELPPQNLILLYMEMMLTLWMWQQGLPWYVSLTPRICCTVSKCTHAPCAFSLVQSWLSNPLPSWQHGPSPPFLLRSFPKRRQWNSLGSGP
cat.2	NM_001078699	17392	Xenopus (Silurana) tropicalis hypothetical LOC548403 (LOC548403), mRNA	3	167	440	no	2	7	1591	MWCSLTKWPILTGRGSQKELSMLKEQELLAILRSRTTSPNTARPKCLSTLGRERQSPYGSPLSLGSPALLTQSETLEGLRLKCIQRMGTGT
tfip11	NM_001097376	17418	Xenopus (Silurana) tropicalis tuftelin interacting protein 11 (tfip11), mRNA	1	57	381	no	3	38	2513	MAKMRTAMEWKWRTLRSRTGTYRMSLTPTAESISKQKRRRPMGCGQSGTLMMRGQALGGKGLETTRPLSILSALGSVSQLQKKNLIVIPTVKRKQGGKLSQRILRQRS
shank2	NM_001102713	17448	Xenopus (Silurana) tropicalis SH3 and multiple ankyrin repeat domains 2 (shank2), mRNA	2	748	1090	no	1	198	4578	MWDGFLQNVWKRFSPSPVMDAQRPAQTEPKSSFDTTLLDLMTALMHPVTASSRRRPWCSRKRTMKVLDLCSEGQRLIHLLRSSTQHQPFRPCSTWSQWMRMGWLGKPAYALGTS
cttn	NM_001128653	17461	Xenopus (Silurana) tropicalis cortactin (cttn), mRNA	3	290	455	no	2	52	1657	MATVGSLVWKRIAWIRWLSAMNIRPSSPNTARSWMPQRALEENLGFRQTEWISLL
ppfia1	NM_001127997	17467	Xenopus (Silurana) tropicalis protein tyrosine phosphatase, receptor type, f polypeptide (PTPRF), interacting protein (liprin), alpha 1 (ppfia1), mRNA	2	3835	3958	no	1	261	3894	MAMCLGYKDWIPPRSGHIPANDDFCLPTLLLQMIMQRWNAT
ppfia1	NM_001127997	17468	Xenopus (Silurana) tropicalis protein tyrosine phosphatase, receptor type, f polypeptide (PTPRF), interacting protein (liprin), alpha 1 (ppfia1), mRNA	2	3532	3733	no	1	261	3894	MRPSTTIRWLCYYRSPPRTLRHVQCWSGNSTTFSSEEQIEDLTMMMIKALDERHHGERNSDQRTFEG
ppfia1	NM_001127997	17469	Xenopus (Silurana) tropicalis protein tyrosine phosphatase, receptor type, f polypeptide (PTPRF), interacting protein (liprin), alpha 1 (ppfia1), mRNA	2	1207	1330	no	1	261	3894	MTWKRESPLLKNATSPHSVKPPLCTTSTINLKMKSLIRSLL
gyltl1b	NM_001102998	17542	Xenopus (Silurana) tropicalis glycosyltransferase-like 1B (gyltl1b), mRNA	2	2293	2524	no	1	384	2553	MTSASSALAGTKCRTSWSWMPRNMNCWFCLMPLSSTCPTLPASTSPSSAPAKITACASRPLRRSFTKTCPGATVPLP
dgkz	XM_002934096	17555	PREDICTED: Xenopus (Silurana) tropicalis diacylglycerol kinase zeta-like (LOC100496839), mRNA	3	1541	1763	no	2	286	3106	MIRGMAPRISCHWTYLITTSAWGLMPTSHWNFMSPERQILRNLTAASVTRCSMRGQRFQTSSLAAPGTWLNTSG
arhgap1	NM_001008140	17589	Xenopus (Silurana) tropicalis Rho GTPase activating protein 1 (arhgap1), mRNA	2	514	646	yes	1	132	1437	MALPVRTSLPWGGLEMPTGSLTANTRKTSRPFTLFIQRCSSRLC
ckap5	NM_001127087	17601	Xenopus (Silurana) tropicalis cytoskeleton associated protein 5 (ckap5), mRNA	2	1105	1342	no	1	108	3405	MLCLWPWLLNALPALLLGSGRSSDPMLDILCQRYWRSLRRRSLRLFRPFKKPLTQSFLPLHCKTSVKTSWLLWTTRTQQ
fgf19	NM_001142825	17608	Xenopus (Silurana) tropicalis fibroblast growth factor 19 (fgf19), mRNA	2	88	436	no	1	0	645	MPGRTCRTAGGSRSEFGTCIRPGGSGTTATTSGYTRMAESMVTGNKACTVYWKSEQLQLELLPLKGIAALCTCAWGPRENSMECTVTPRMIALLKRSFSRMDTTCINQGNMALLSP
fgf4	NM_001142822	17611	Xenopus (Silurana) tropicalis fibroblast growth factor 4 (heparin secretory transforming protein 1, Kaposi sarcoma oncogene) (fgf4), mRNA	3	419	581	no	1	0	576	MQIQRDPSAQQLQRLRIEEIPRHVHRSEQKWKDKKREQSFSDNDTDPFLAPDMX
ano1	NM_001130327	17621	Xenopus (Silurana) tropicalis anoctamin 1, calcium activated chloride channel (ano1), mRNA	3	380	632	yes	2	151	3088	MAYTLEMGRRRWIISWHIPTRNPPAAEHQTKKTITATPYIACTAQRMITISPGEQPTWRQWKQSLKWIIMKTTSVSAGKSMKAT
sntg1	XM_002934111	17664	PREDICTED: Xenopus (Silurana) tropicalis gamma-1-syntrophin-like (LOC100489155), mRNA	2	496	634	no	1	0	1611	MKIVLVYLVTKAVAHPLLSVTADYISIIIPTTRIVYHVHHGQLHQV
sntg1	XM_002934111	17665	PREDICTED: Xenopus (Silurana) tropicalis gamma-1-syntrophin-like (LOC100489155), mRNA	2	1315	1558	no	1	0	1611	MLQQRQFCGNTSSLNSKVLQMMEKVKLNFYSRTKIQNKLKQRSWSSPISLQYFTVYIHFLLLKLLVWTLVLWTVRELPLLL
rb1cc1	XM_002934103	17672	PREDICTED: Xenopus (Silurana) tropicalis RB1-inducible coiled-coil 1 (rb1cc1), mRNA	3	290	434	no	2	202	4930	MLSKQSTKLQFIIRYLLSMEGNVWHLIEGSVATALVLTQIQFFYSIRK
mrpl15	NM_001126635	17698	Xenopus (Silurana) tropicalis mitochondrial ribosomal protein L15 (mrpl15), nuclear gene encoding mitochondrial protein, mRNA	2	763	937	no	1	117	1005	MVKPVDIWLIQEKYWKLESNWQRNMAIFYQTLPKMNCTRCCVPERIPGRYFLGLPQAG
tgs1	XM_002934106	17723	PREDICTED: Xenopus (Silurana) tropicalis trimethylguanosine synthase-like (LOC100488247), mRNA	2	619	937	yes	1	0	2535	MAKGYYGSTGLKSIQSYPCQESFVALNPGALLIPRMNGINVIMNVTGAILNSFSTGLIKGGLLMHPMCLKSVKYNPRVQMKATLTSAPGCLLETVIAFRKTIAKLL
LOC100488503	XM_002934107	17735	PREDICTED: Xenopus (Silurana) tropicalis zinc finger protein PLAG1-like (LOC100488503), mRNA	2	340	505	no	1	0	1497	MILIKRHLSVKNAERTTIQSLVLNVTWPCMLQQVETSPVKYACRLLKAQLCCWST
LOC100494971	XM_002934128	17751	PREDICTED: Xenopus (Silurana) tropicalis hypothetical protein LOC100494971 (LOC100494971), mRNA	2	5326	5464	no	1	0	5697	MKLPRLTNPINKTQHRSLIQHLLFQAHKTCYTSMGMVPTVTILTEG
LOC100494971	XM_002934128	17754	PREDICTED: Xenopus (Silurana) tropicalis hypothetical protein LOC100494971 (LOC100494971), mRNA	2	5044	5191	no	1	0	5697	MKTWTEWSLYLSSPKKRSRLSLTHAGVNSLNIKNVPENVYALTSSPAGG
asxl3	XM_002934129	17762	PREDICTED: Xenopus (Silurana) tropicalis additional sex combs like 3 (asxl3), mRNA	2	5512	5632	no	1	0	6435	MLKKMAAIIQKLVPHIDSIFTKCHWLREGQPHRCIYRKVL
klhl14	XM_002934117	17766	PREDICTED: Xenopus (Silurana) tropicalis kelch-like protein 14-like (LOC100493162), mRNA	2	2101	2221	no	1	765	2595	MLEQCTMEKSIFLVVFIMVNMSSGYTVMTQSWMFGPENKT
klhl14	XM_002934117	17768	PREDICTED: Xenopus (Silurana) tropicalis kelch-like protein 14-like (LOC100493162), mRNA	2	2416	2539	no	1	765	2595	MIGVTLLEATAGVWVHISHPPFVTALRKQAGQNWRETLQNH
mcm3	XM_002934119	17783	PREDICTED: Xenopus (Silurana) tropicalis minichromosome maintenance complex component 3 (mcm3), mRNA	2	1366	1504	no	1	0	2421	MEGMINIELPWRTLVCKILCFQDLTCFLLSWTKWMQTTIEKLLTMF
b4galt5	NM_001016211	17811	Xenopus (Silurana) tropicalis UDP-Gal:betaGlcNAc beta 1,4- galactosyltransferase, polypeptide 5 (b4galt5), mRNA	2	868	991	no	1	183	1332	MWIIYQKMIAIITAVERCHVILLLNLTSTCTSFHTMSFLEV
enosf1	NM_001113128	17842	Xenopus (Silurana) tropicalis enolase superfamily member 1 (enosf1), mRNA	1	66	333	no	3	398	1313	MITGTITSLHVTDVRFPTSLDQHGSDAMHTDPDYSAAYIVIETDAADGLKGHGLTFTLGKGTEIVVCAVRALSRLGPKKELFSWLLLLS
LOC100493987	XM_002934122	17844	PREDICTED: Xenopus (Silurana) tropicalis thymidylate synthase-like (LOC100493987), mRNA	1	384	537	no	3	71	995	MQMAPGNFWTSKDSQTERKEILDQCMAFSGGTLVLNTKTLIQITQVKVLTN
LOC100496057	XM_002934134	17867	PREDICTED: Xenopus (Silurana) tropicalis rho-associated protein kinase 1-like (LOC100496057), mRNA	2	3541	3853	no	1	0	4140	MSVLLHKGMFTEPIQKRYLGYFRYCMPMRGNVGKMWNWSQFNKQRRQISSITKAMSLFQHFTTFQQIVRPVPNPCGMFLSPLQHLNAEDAMSNVIKITWIKRRN
greb1l	NM_001130279	17876	Xenopus (Silurana) tropicalis growth regulation by estrogen in breast cancer-like (greb1l), mRNA	3	4778	5000	no	2	349	6259	MQLTIPSTTVSSAISIWMSVLRHRCQNPLCMPSLSLHRCLEKRSSFTLSSLNLKNTILSSVNKESTWRACAFPW
greb1l	NM_001130279	17879	Xenopus (Silurana) tropicalis growth regulation by estrogen in breast cancer-like (greb1l), mRNA	3	5090	5291	no	2	349	6259	MPWKVSAICTSWLSKSMKCHYTGNIGPITLCWCCLGCLTMLEQVLQDSLLKSCPTITWSWSATAWKN
abhd3	NM_001032325	17887	Xenopus (Silurana) tropicalis abhydrolase domain containing 3 (abhd3), mRNA	2	409	541	no	1	63	1296	MEGRFLWIGLIMMIIHFTLTLATDLQSFYCPDSQEQAENHISST
abhd3	NM_001032325	17888	Xenopus (Silurana) tropicalis abhydrolase domain containing 3 (abhd3), mRNA	2	1087	1309	no	1	63	1296	MLWMMFSLLDMLFQWRQPDKTQMSHWCLQLMEVILVFLKAFGQESKLTWTKFLSSLYRLSLSMAMRSIVCSTHK
mib1	NM_001129935	17900	Xenopus (Silurana) tropicalis mindbomb homolog 1 (mib1), mRNA	2	421	652	no	1	183	3213	MMGPCVIHAASNLLLESVGNVLNVLIMIYALCATMGISITLDIAFTGSQHREARGCSWSLGANQRKLRQEVSLQALE
rbbp8	XM_002934135	17916	PREDICTED: Xenopus (Silurana) tropicalis retinoblastoma binding protein 8 (rbbp8), mRNA	2	2056	2671	no	1	219	2619	MKAKVKTALKKCLTRVSMESMCCALKTGALPKVAKKGMICLPWKITKLPKKKRLKLKERHIRSRRHLWSHISKDLNKKSLQWIFLTLKLFAKKMRDEKCLGILARNVNCTMPTFQRKREQRSWLPAQGTGSDTFRQAPLKIFGRWDFLPRKHAKTEATLKKNSLPASVLEEDNLIMLNFHQRLKSRRHKLDKQFNFYIYAVKCPV
riok3	NM_001004996	17925	Xenopus (Silurana) tropicalis RIO kinase 3 (riok3), mRNA	2	586	781	no	1	294	1818	MVTARYPYRLRTIGKFIPVKKMTAQRMKWTGKTLAMIHTKQINQRLPLKKALLARGKTLQLNMMR
LOC100494646	XM_002934126	17927	PREDICTED: Xenopus (Silurana) tropicalis Niemann-Pick C1 protein-like (LOC100494646), mRNA	2	1051	1189	no	1	354	4200	MSLWKKAGLPVVVRTALFLVVLCPSLHHFLLHGLYLAWMLWLSSCG
LOC100494646	XM_002934126	17929	PREDICTED: Xenopus (Silurana) tropicalis Niemann-Pick C1 protein-like (LOC100494646), mRNA	2	874	1009	no	1	354	4200	MSRLWLCCVERMSRTVMLLTGFSTCSAKIMGRFLLPSHLSFQMIL
lama3	XM_002934138	17945	PREDICTED: Xenopus (Silurana) tropicalis laminin subunit alpha-3-like (LOC100496680), mRNA	2	4873	5146	no	1	0	9909	MISQPQEVGRLHPKLRSAPAHRNIVVTHVRTVPLDTIGIIVDCSWESVSHACVMAIPTDVKMVLEYVLTVFMTQQVTTVNFVKKAILEMQL
osbpl1a	NM_001112949	17968	Xenopus (Silurana) tropicalis oxysterol binding protein-like 1A (osbpl1a), mRNA	3	851	1001	no	2	391	1711	MTLCFTGPFTLNSSSGVRVWKLNQKELLLWSFSNIRKPTHGQILLAVYII
LOC100492273	XM_002934163	17972	PREDICTED: Xenopus (Silurana) tropicalis noelin-3-like (LOC100492273), mRNA	2	1210	1573	no	1	0	1431	MSPTPTLLEPRSFTHTPPRPLHMSTQTFPFTTNIFTYLCWITIHGIVPFMPGTMDTRYSSMSLCFTSSRQIMMHDVEHNPSFKWNTCLPLNSLFILCPFSFCLSILHSFHLSFRCSQYKFP
cdc14a	XM_002934152	18003	PREDICTED: Xenopus (Silurana) tropicalis dual specificity protein phosphatase CDC14A-like (LOC100490252), mRNA	2	361	673	no	1	0	1725	MLNIFLSEMLHLGAAHITLPYWIACRGSERLYTLASLTLRTLMQMNMNIMRGLRMVILIGLFLASFWHSVGPTQKVKLKMVIPFMHPKLTSHISENIISGLSSD
LOC100492433	XM_002934164	18051	PREDICTED: Xenopus (Silurana) tropicalis LIM homeobox transcription factor 1-alpha-like (LOC100492433), mRNA	2	166	292	no	1	0	1140	MNSVPNAAPAKNPWKAAVSTETKSFTVGTTMRSCLLSNVEPA
LOC100489254	XM_002934146	18080	PREDICTED: Xenopus (Silurana) tropicalis dimethylaniline monooxygenase [N-oxide-forming] 5-like (LOC100489254), mRNA	2	280	559	no	1	0	1161	MLSISSCSSTSALRPQLIVLKNARILQQVDNGKLSLKQKENRRRPFLMLCLFALDTIQMLIFLWIHFQVLRDLKGSIFIAVIIRTQQNLVAKE
LOC100489408	XM_002934147	18083	PREDICTED: Xenopus (Silurana) tropicalis dimethylaniline monooxygenase [N-oxide-forming] 2-like (LOC100489408), mRNA	2	118	247	no	1	0	1653	MKVWNPPALKGVMILVGSGDLQNMWRMAEPASMNLLLATPAKK
lmo4.1	NM_001004922	18197	Xenopus (Silurana) tropicalis LIM domain only 4, gene 1 (lmo4.1), mRNA	2	871	1042	no	1	354	849	MRAFISDSVHRRWIPCVCSRQVTFVASTSASLMPLHLLYSPLPSTHIFWCFKLTVEH
lmo4.1	NM_001004922	18198	Xenopus (Silurana) tropicalis LIM domain only 4, gene 1 (lmo4.1), mRNA	2	670	802	no	1	354	849	MFIILNVSRVLPVGIALSPGTGFTISMAVYSASMIDLQLSSMVI
ptprd	NM_001126889	18207	Xenopus (Silurana) tropicalis protein tyrosine phosphatase, receptor type, D (ptprd), mRNA	1	597	759	no	3	527	1145	MLVLKHHQSLQEPLLIRLEYQGELHHLFAKLLETQGLKSSGIKRARKSAIRDLR
kdm4c	NM_001112998	18218	Xenopus (Silurana) tropicalis lysine (K)-specific demethylase 4C (kdm4c), mRNA	1	969	1113	no	3	149	3347	MGITPVSIMVSTVPNQQILLQSDGLITEKLPNCVLAAMIWLKSPWIYL
kiaa1432	XM_002934173	18245	PREDICTED: Xenopus (Silurana) tropicalis KIAA1432 (kiaa1432), mRNA	3	3125	3320	no	2	535	4795	MKYWKKKLPHGSLFPTLCFPLWLSSLQSFHFSCKRLYIVHGRQNMPCGIIFLLLLVIPRICLRSA
LOC100496527	XM_002934174	18279	PREDICTED: Xenopus (Silurana) tropicalis zinc finger protein GLIS3-like (LOC100496527), mRNA	2	2440	2722	no	1	0	2766	MSKDFMGSCRRFVLHITTILREICSMAAHAIWDLHSRTACLMLVETKLNLMASTGLLPLTLALQFTTSQVVRRAFLESPKETAQRTLVSFKLMQ
rfx3	XM_002934183	18283	PREDICTED: Xenopus (Silurana) tropicalis regulatory factor X, 3 (influences HLA class II expression) (rfx3), mRNA	2	364	520	no	1	0	2454	MFTQHKYNMLKEVTQSTQMEQSGQQHILTQKPRCTAKILVGITLIPRVDQHK
crygb	NM_001079313	18285	Xenopus (Silurana) tropicalis crystallin, gamma B (crygb), mRNA	2	64	256	no	1	15	540	MSAAQTVLTCPLTSIAATPSGWIVGTGSSMSTPVTRDTSITSGKENTPTSRDGWVSTTPSGPVA
LOC100496681	XM_002934175	18287	PREDICTED: Xenopus (Silurana) tropicalis gamma-crystallin-3-like (LOC100496681), mRNA	2	49	241	no	1	0	525	MSAAQTVLTCPLTSIAATPSGWIVGTGSCMSTPVTGDTSITSGKENTPTSKDGWVSTTPSGPVA
LOC100486835	XM_002934186	18325	PREDICTED: Xenopus (Silurana) tropicalis phosphatidylinositol 3-kinase regulatory subunit alpha-like (LOC100486835), mRNA	3	2252	2399	no	1	285	2451	MLCGGRRRGKALCYKQNSYWLWLCRTIQLVQLSERTGATLPTHVPCTAQ
mast4	XM_002934204	18334	PREDICTED: Xenopus (Silurana) tropicalis microtubule-associated serine/threonine-protein kinase 4-like (LOC100489840), mRNA	3	482	743	no	2	34	7180	MDAAGLWHPSPHLDMEQTLQALLCLHHVHPRRSCTNYHTNPHLMSCIFCPNISAPRALPATTDAGLRCALDPGVSALDVRRHAVTMK
LOC100490191	XM_002934206	18372	PREDICTED: Xenopus (Silurana) tropicalis GTP-binding protein ARD-1-like (LOC100490191), mRNA	2	625	766	yes	1	0	1548	MALEWLTQNMFPEPLRMPGPVSEPIFPTYMKHFAARKKWPSVSLMPM
adamts6	XM_002934207	18384	PREDICTED: Xenopus (Silurana) tropicalis A disintegrin and metalloproteinase with thrombospondin motifs 6-like (LOC100490362), mRNA	2	931	1213	no	1	0	3237	MRTSPLTASVSGRNPFSLTRVMEIPFQKMASLTMTTQSLLPGMTSVHIKTSLVGLLAWPQWLECVSRRGAAVLMKTLAWVLHLPLHMRLVTILV
adamts6	XM_002934207	18386	PREDICTED: Xenopus (Silurana) tropicalis A disintegrin and metalloproteinase with thrombospondin motifs 6-like (LOC100490362), mRNA	2	1378	1651	no	1	0	3237	MNLQSEISYTLLLLQVRFMMQMNNAAFSTEQHHANVNTGKCVESSGVLVKVTDVLPTVFLLLKEPSVRQGASKKGGAIRETVCLLEPGQRA
adamts6	XM_002934207	18387	PREDICTED: Xenopus (Silurana) tropicalis A disintegrin and metalloproteinase with thrombospondin motifs 6-like (LOC100490362), mRNA	2	1984	2155	no	1	0	3237	MPRKTGAVCVAEMEALVKPLKVSLMIPYPEEATWKLFKFHEVLYTLKSKKCQCLRTI
cwc27	XM_002934195	18391	PREDICTED: Xenopus (Silurana) tropicalis CWC27 spliceosome-associated protein homolog (cwc27), mRNA	1	315	567	no	3	170	1592	MITQYFTELFPTLLFKGEILQVLEQEVNLFMVNLLGMNSIHVSDLIAEDWLLWQTLDLMIMEANFSLLLAVPMSLITSIPSLER
LOC100488664	XM_002934197	18396	PREDICTED: Xenopus (Silurana) tropicalis regulator of G-protein signaling 7-binding protein-like (LOC100488664), mRNA	3	437	644	no	2	421	1180	MGAKTAPGPRDRASRSATKRSPETVSAGGAQRAPSHPTEPWSTARCLSRTSTPRWLYSESWSFPLETCP
rnf180	NM_001114254	18399	Xenopus (Silurana) tropicalis ring finger protein 180 (rnf180), mRNA	3	1361	1565	no	2	673	1870	MKRMSILWKRKATSVQFAWMFILILTCAILVNTYSVNRVCEQLPKTIRQRRCAHSVEQQSHESVSSLS
kif2a	XM_002934199	18412	PREDICTED: Xenopus (Silurana) tropicalis kinesin heavy chain member 2A, transcript variant 1 (kif2a), mRNA	2	394	520	yes	1	261	2466	METLKEKRLTWKVYFHLILTWLLMKKLTPGQRCHLPLHLLLK
kif2a	XM_002934199	18413	PREDICTED: Xenopus (Silurana) tropicalis kinesin heavy chain member 2A, transcript variant 1 (kif2a), mRNA	2	565	742	no	1	261	2466	MKHLQGTIELQQSVPHVHDQASLLNSRPPHSRMVVFQIYLQISLEKRTLALLPEENQTV
kif2a	XM_002934201	18416	PREDICTED: Xenopus (Silurana) tropicalis kinesin heavy chain member 2A, transcript variant 3 (kif2a), mRNA	2	394	520	yes	1	261	2325	METLKEKRLTWKVYFHLILTWLLMKKLTPGQRCHLPLHLLLK
kif2a	XM_002934200	18420	PREDICTED: Xenopus (Silurana) tropicalis kinesin heavy chain member 2A, transcript variant 2 (kif2a), mRNA	2	133	259	yes	1	0	2229	METLKEKRLTWKVYFHLILTWLLMKKLTPGQRCHLPLHLLLK
kif2a	XM_002934200	18421	PREDICTED: Xenopus (Silurana) tropicalis kinesin heavy chain member 2A, transcript variant 2 (kif2a), mRNA	2	304	475	no	1	0	2229	MKHLQGTIEQSVPHVHDQASLLNSRPPHSRMVVFQIYLQISLEKRTLALLPEENQTV
hps5	NM_001097257	18436	Xenopus (Silurana) tropicalis Hermansky-Pudlak syndrome 5 (hps5), mRNA	1	642	762	yes	2	508	3823	MAGTRKFWRGPKPHTKRWVEAATHSHSQGRCNFSCFLLRS
sgsm3	NM_001130365	18446	Xenopus (Silurana) tropicalis small G protein signaling modulator 3 (sgsm3), mRNA	1	810	1005	no	3	359	2618	MMILWQQNRLRKTYCGRCQVMPVSQTCKVWVCPVCEGFCVVWHGYTQILVTVKALEWWLHACCSF
tef	NM_001017319	18472	Xenopus (Silurana) tropicalis thyrotrophic embryonic factor (tef), mRNA	1	681	840	no	3	23	911	MKNTGHDGTRTMLQPSVPVMPGDSKKIRSLFGQPSWKKKTQHCAQRWPTSAKS
LOC100488248	XM_002934233	18476	PREDICTED: Xenopus (Silurana) tropicalis galanin receptor type 2-like (LOC100488248), mRNA	3	326	452	no	2	82	1234	MDGYSGLSSAKLCTSLSTYQCMPAASPWLPSQWTGTLPSATH
csnk1e	NM_001011137	18527	Xenopus (Silurana) tropicalis casein kinase 1, epsilon (csnk1e), mRNA	3	617	791	no	2	37	1285	MTWRVWDMYLCTLIWVLCPGKVSRLQLNVRSMNASARRKCLHLLRFCAKVTPPSSPRI
prkcd	XM_002934221	18639	PREDICTED: Xenopus (Silurana) tropicalis protein kinase C, delta, transcript variant 1 (prkcd), mRNA	3	614	758	no	1	81	2130	MGPEQARLQMQTMQRCYSQKMHRNDHWQMYRYCCQQPGHHVPERTLQH
prkcd	XM_002934222	18643	PREDICTED: Xenopus (Silurana) tropicalis protein kinase C, delta, transcript variant 2 (prkcd), mRNA	3	548	692	no	1	0	2064	MGPEQARLQMQTMQRCYSQKMHRNDHWQMYRYCCQQPGHHVPERTLQH
LOC100486783	XM_002934224	18653	PREDICTED: Xenopus (Silurana) tropicalis 6-phosphofructo-2-kinase/fructose-2,6-biphosphatase 4-like, transcript variant 2 (LOC100486783), mRNA	3	698	833	no	2	325	1735	MWQCLTQQTQQENGERPSLNLQIRTVLKLSLWNLCVWTLKLLLRI
LOC100486783	XM_002934223	18663	PREDICTED: Xenopus (Silurana) tropicalis 6-phosphofructo-2-kinase/fructose-2,6-biphosphatase 4-like, transcript variant 1 (LOC100486783), mRNA	3	698	833	no	2	325	1735	MWQCLTQQTQQENGERPSLNLQIRTVLKLSLWNLCVWTLKLLLRI
iars	NM_001097221	18708	Xenopus (Silurana) tropicalis isoleucyl-tRNA synthetase (iars), mRNA	3	1691	1850	no	2	88	3865	MHRCTTHLRTGESLKIVSLLTLLRRVSIKPGGGSTPCWCFPLLSLGSLPSRML
atp2b2	XM_002934230	18719	PREDICTED: Xenopus (Silurana) tropicalis plasma membrane calcium-transporting ATPase 2-like (LOC100487776), mRNA	3	923	1196	no	2	496	4231	MKEKQKLAGLKELPSSCRLSVLYLSLPSMTGAKKSNSGASKAALNKNKNLQWSVVVRSYRFLWQKWWLETLHKSNMAIFSLLMAYLFRETT
enpep	XM_002934249	18739	PREDICTED: Xenopus (Silurana) tropicalis glutamyl aminopeptidase-like (LOC100494326), mRNA	2	691	871	no	1	0	2895	MNQQMHANPSHVLMNPIKKQPIRLALSIGRSMMPYQTCPYRNQSPLEMDGRGLCLRSQFL
camk2d	NM_001113692	18793	Xenopus (Silurana) tropicalis calcium/calmodulin-dependent protein kinase (CaM kinase) II delta (camk2d), mRNA	1	1011	1149	yes	2	505	1933	MVWVCWHSRLFITRSFTKGSLWQASGYVGMWCHSLHPSCWLSTFLG
camk2d	NM_001113692	18794	Xenopus (Silurana) tropicalis calcium/calmodulin-dependent protein kinase (CaM kinase) II delta (camk2d), mRNA	3	1073	1223	no	2	505	1933	MASQWICGHVVSFSTSFLLAIHLSGMRTNIGFISRLRLVLMIFHLLSGIQ
ndst4	XM_002934247	18805	PREDICTED: Xenopus (Silurana) tropicalis N-deacetylase/N-sulfotransferase (heparan glucosaminyl) 4 (ndst4), mRNA	2	2140	2275	yes	1	912	3531	MVFQQTWVMLSLHITQVSTLYTCSSMKLGKKFGTSRSQAQKSILT
myoz2	NM_001011415	18832	Xenopus (Silurana) tropicalis myozenin 2 (myoz2), mRNA	1	111	282	no	3	44	860	MEMVEMSQMDWTLGKRSVSHETLCLRSYPTSITVEQDFLRCVREDQTSIHMKTFHMQ
tenm2	NM_001102690	18854	Xenopus (Silurana) tropicalis odz, odd Oz/ten-m homolog 2 (odz2), mRNA	1	579	819	no	3	425	8564	MIPPGFCMETELKIWFTERQMNIQDKVRISLYGSWVSVNQHHAGDWHFVLIWGFHTEVTPSTQAPMPRLRMKVSCRQNMP
tenm2	NM_001102690	18855	Xenopus (Silurana) tropicalis odz, odd Oz/ten-m homolog 2 (odz2), mRNA	1	2085	2262	yes	3	425	8564	MGNTPRDAASVTAVGRARNVMSPVLNAWIHCVVAMESALWDPVLVIQDIRGKTVKKLIA
tenm2	NM_001102690	18856	Xenopus (Silurana) tropicalis odz, odd Oz/ten-m homolog 2 (odz2), mRNA	1	1149	1362	no	3	425	8564	MYHWRAGIFCSKQEQGRLHYSALQRQGTQWHLALFIPLPPDHFLATPYQEVLLNSKSPPSTVAGNVQHSVP
tenm3	NM_001016175	18860	Xenopus (Silurana) tropicalis odz, odd Oz/ten-m homolog 3 (odz3), mRNA	2	364	604	no	1	210	789	MIPPGFCMETELKIWFTERQMNIQDKVRISLYGSWVSVNQHHAGDWHFVLIWGFHTEVTPSTQAPMPRLRMKVSCRQNMP
MGC79698	NM_001004872	18867	Xenopus (Silurana) tropicalis protein WWC2 (MGC79698), mRNA	1	1599	1728	no	3	182	3695	MNQQQTWTISTNWTSSYRKKVGTFLVGPSPPYMKMKWSIVTRG
ing2	NM_001017044	18877	Xenopus (Silurana) tropicalis inhibitor of growth family, member 2 (ing2), mRNA	3	452	698	no	2	28	865	MHLKGLHVDLAGSATARAGSYVTWSMGWMTSKSSHQKKRNQSRPKRKNVPKPSKKERHPLYLLQLTPTSPRTVCAIRCLMVR
LOC100485820	XM_002934260	18883	PREDICTED: Xenopus (Silurana) tropicalis UPF0636 protein C4orf41 homolog (LOC100485820), mRNA	2	1120	1252	no	1	252	3651	MPLHSSESTLIYVKRKLVALSCHLSTQPGCLNSSRLLEIYLMKL
LOC100485979	XM_002934261	18887	PREDICTED: Xenopus (Silurana) tropicalis storkhead-box protein 2-like, transcript variant 1 (LOC100485979), mRNA	2	1690	1870	no	1	195	3144	MSLVNWPKGELKCLFLSLQGVVPIPRSIVATAIHRIEDQEMNGQIKPRKGLGPWTTRRGL
LOC100485979	XM_002934262	18892	PREDICTED: Xenopus (Silurana) tropicalis storkhead-box protein 2-like, transcript variant 2 (LOC100485979), mRNA	2	1324	1504	no	1	0	2778	MSLVNWPKGELKCLFLSLQGVVPIPRSIVATAIHRIEDQEMNGQIKPRKGLGPWTTRRGL
ccdc111	NM_001015920	18905	Xenopus (Silurana) tropicalis coiled-coil domain containing 111 (ccdc111), mRNA	1	1038	1206	no	1	150	696	MTSFSLLLHEKAFKEAFAPGTIFHQRNCWFMRLLTTGGVQTLEEPTKVIMSCYWWM
acsl1	NM_001006829	18917	Xenopus (Silurana) tropicalis acyl-CoA synthetase long-chain family member 1 (acsl1), mRNA	2	373	577	no	1	21	2115	MNGFLIKRWQKELSMLGLRCCTEGSNLHRINLWAYLHKTDQSGQLWNWAATHTPWWLCPCMTLWELRQ
pdlim3	NM_001005814	18952	Xenopus (Silurana) tropicalis PDZ and LIM domain 3 (pdlim3), mRNA	3	776	1085	yes	1	78	831	MVDDDPDRPAGTRSVRAPMTKPSTGAAAVQKVPVCDRCGNGIVGTVVKAKDKLRHPDCFVCTDCNLNLKQKGYFFVEGQLYCEAHARARMRPPEGYDAVTVYH
sorbs2	NM_001141994	18955	Xenopus (Silurana) tropicalis sorbin and SH3 domain containing 2 (sorbs2), mRNA	3	845	1208	no	2	397	4681	MSLESQQQLERRLTDQRTGTRPCSNKFTWFINQTMTWIILAQPMHIILITVQLFPPFHILLRRHTHTGLSLKVSQTMALMYSESHPLFLLLLYLCLLQLCLFDHGSNPPLIRMNGNHLTEK
dtx1	XM_002934268	18984	PREDICTED: Xenopus (Silurana) tropicalis deltex homolog 1 (dtx1), mRNA	2	1228	1681	no	1	0	1869	MRIAPFAWNVWSLHQVMMVFSVIEAFVVSWLESLESVTTCTMCCAWWPCITMGIRMVACSVQLVKQFMERRQAHNLQGRWNSMSSHTLCLVTQTVKPYASYMISQAACRGLNILTLARSLQPEDFHDTAIYQIMIRGERYCDSYWQLGNGA
MGC76258	NM_203978	19001	Xenopus (Silurana) tropicalis hypothetical protein MGC76258 (MGC76258), mRNA	2	112	556	no	1	3	2025	MGSRVMAPMHSPLMPVTHKHRQQPAMASLPMPLLMDSHQQDTLLQLLPKHIASPCRDTALQAMTVPLQQLPQLRLHMLHPLPTVLNLHILLMVSSLPLLHLQDLKMEANQQIPVSPHQVQPHMPSPAWDIVKAATATLKFQQAIQCSK
ap1b1	NM_001127972	19012	Xenopus (Silurana) tropicalis adaptor-related protein complex 1, beta 1 subunit (ap1b1), mRNA	3	743	887	no	2	109	2947	MSAQNGAKYLSWTVWPTISQKMTVKHRVYVNVLLHGSPMQTQLWFCLQ
ascc2	NM_001016871	19033	Xenopus (Silurana) tropicalis activating signal cointegrator 1 complex subunit 2 (ascc2), mRNA	3	395	641	no	2	106	2308	MLQGDMTVTAPFLHLFRKCRMSFITMSSSLSCVCRHTKNPRNTTLLPLCLGKSCTTTTCLTFLSSWISVSFLERGIRLCYRR
mtmr3	XM_002934269	19040	PREDICTED: Xenopus (Silurana) tropicalis myotubularin-related protein 3-like (LOC100494490), mRNA	2	1249	1438	no	1	300	3945	MLDRMLLQWPTVPRVEAVSALSIILTVRLCSWEWPIFTPFVKASSLYAYSAHRCLTQPTGFLH
LOC734097	XM_002934271	19061	PREDICTED: Xenopus (Silurana) tropicalis splicing factor 3a, subunit 1, 120kDa (LOC734097), mRNA	1	1737	1977	yes	3	248	2645	MGILVAWHVPNRQHKQTSHFRNKLRPSTKPKVWFLRRMGRTRLAQASLMKCHNLHLLHLPFLLLHPLSAVYQDLCLTTSK
LOC734097	XM_002934271	19064	PREDICTED: Xenopus (Silurana) tropicalis splicing factor 3a, subunit 1, 120kDa (LOC734097), mRNA	1	1296	1626	no	3	248	2645	MRVLMMKNIHQRLLFLQSLLCLHHCLLHQTRLLSGRIMTPRLQSLCPLLLLLMSIWCPLLLERKYLLVRCRNTCALDYWIHAGWSKETVLFVKSKEMMKYMLQGWILRAA
sec14l3	NM_001126793	19072	Xenopus (Silurana) tropicalis SEC14-like 3 (sec14l3), mRNA	3	134	398	no	2	28	1258	MTISCCGGCELEALTCRKQRICSARMLNFESKWTQTMCWKNGSLQRWFRNTCQGACVDMTGRTVPSGMMLLGLWIPRDYCFQLPSRTS
mtfp1	NM_001102827	19076	Xenopus (Silurana) tropicalis mitochondrial protein 18 kDa (mtp18), nuclear gene encoding mitochondrial protein, mRNA	2	343	556	no	3	83	569	MASFGFSGYSRLYHQSYLCSISLPYGTSNPLAPPSSEVGNHRSRTVCNSHYYNTNRQVSRLDAGLQSSETI
LOC100485112	XM_002934295	19140	PREDICTED: Xenopus (Silurana) tropicalis olfactory receptor 10A7-like (LOC100485112), mRNA	2	217	388	no	1	0	948	MLPSHYQSCFRPFLPKGRPSLSVAVVLRCTVSSLLVSLSASFWLLWLMTGMWPSAIL
tmem55b	NM_001130375	19226	Xenopus (Silurana) tropicalis transmembrane protein 55B (tmem55b), mRNA	3	707	1061	no	1	60	906	MFLLFLVRSFAGSGCCRTCWGNVDFGIQIWWHLCLLGNCASPSSGMSWSRYLLGLYASQSPCPKLLMNIRPSSFSFPNMARITSNRLKAQDGERALAHNKGGKSLLHFKAVMIIVPQS
slc12a6	NM_001079108	19230	Xenopus (Silurana) tropicalis solute carrier family 12 (potassium/chloride transporters), member 6 (slc12a6), mRNA	1	2229	2400	no	2	313	3700	MWITDPSPFTQLAPSLPLLSLDFIFSWNGTVFSPHVYLFLVLCPNFHGNCWNDLQVH
slc12a6	NM_001079108	19234	Xenopus (Silurana) tropicalis solute carrier family 12 (potassium/chloride transporters), member 6 (slc12a6), mRNA	3	626	812	no	2	313	3700	MMKGTLMTEIWPCLRKKWILDQKFHPSLTAWLITQICLREQKNMKRKVRARRRLLKPPEWAR
dnaja4.1	NM_001079380	19253	Xenopus (Silurana) tropicalis hypothetical protein MGC147512 (MGC147512), mRNA	2	268	409	no	1	114	1302	MKCYLIPKKGTSMIRVESRQLKKEEWAEETFLHLWISLTCSLVEVAE
dnmt1	XM_002934338	19323	PREDICTED: Xenopus (Silurana) tropicalis DNA (cytosine-5-)-methyltransferase 1 (dnmt1), mRNA	3	2762	2918	no	2	250	4726	MMWMRICTQNTTVNHQTTLRVATWMLQNHTDWVALRRYSATREVMERLMSRI
eif3s4	NM_001016749	19328	Xenopus (Silurana) tropicalis eukaryotic translation initiation factor 3, subunit 4 (delta) (eif3s4), mRNA	1	714	1005	no	3	32	962	MPQSASQTYPKTHGRLISRSSLDHSDRFLESTWPKTRPPGSQRVLPSSVSTAERMQLAPSQESRALAMIILFSMWNGPSPRPTDGKQLPVRQRKMIL
LOC100495309	XM_002934339	19365	PREDICTED: Xenopus (Silurana) tropicalis angiopoietin-related protein 2-like (LOC100495309), mRNA	1	1167	1644	yes	3	239	1664	MELQTFLLIGIATSMDLETLMVNTGWVWKIFTGWPAREASSSSSSWKTGRAVMQKLNMTTFVWNRRAISIGCALDITVATPGTPSLGTVTNSLAPMTRTGTHTQVTVPISIRAAGGTTCVPTPTSMGYGTGEAITGAATKMECIGLNFAVVPTLLRRCP
LOC100495633	XM_002934340	19369	PREDICTED: Xenopus (Silurana) tropicalis histone-lysine N-methyltransferase PRDM9-like (LOC100495633), mRNA	1	237	429	no	3	86	473	MSEGKGLSARNAGKCFLTGRTLCNIKKPIRDSQRLRATSAGSDSTKSLTWTVTRRLTISRSRLR
glod4	NM_204039	19389	Xenopus (Silurana) tropicalis glyoxalase domain containing 4 (glod4), mRNA	3	512	665	no	2	13	907	MKPRRMPFWDMEITSVSWNYRILVGQWTMGQRLAELPLLALKMSFQTSRQR
glod4	NM_204039	19390	Xenopus (Silurana) tropicalis glyoxalase domain containing 4 (glod4), mRNA	3	758	911	no	2	13	907	MAMKFVLLVMKHFKNCLRPIQLQTNFLMMLWTQTRVQNGLQNTVDRSLLPR
nxn	NM_001142200	19396	Xenopus (Silurana) tropicalis nucleoredoxin (nxn), mRNA	1	537	690	yes	3	56	1298	MASHRKAVLWMGLMSVSISLHTGALHAAVLPVFWWNLTGKLRSLDRSLKLC
LOC100496262	XM_002934344	19420	PREDICTED: Xenopus (Silurana) tropicalis double C2-like domain-containing protein beta-like (LOC100496262), mRNA	2	220	403	no	1	0	1182	MWTNYLEPMELLPLHLLNMKRKGTWMDMILTTALHLGHWILACCMIKKTMPCTALSIKPRV
LOC100496571	XM_002934346	19435	PREDICTED: Xenopus (Silurana) tropicalis protein phosphatase 1E-like (LOC100496571), mRNA	1	969	1191	no	3	134	2093	MKSIESRPWEAVLSGLGHGGLTEAFLSPEPLGMQSTSHIFVEMLILSPLSLMALKITSFWHVMDSMIQSTLMKL
smg8	NM_001078823	19452	Xenopus (Silurana) tropicalis chromosome 17 open reading frame 71 (c17orf71), mRNA	3	401	578	no	2	70	2815	MQRLTSGGRMRRSCTACTCSIYSQCAISWFWCTLPAALISPMRNCSGLWIVSGKRCCHH
nhs	XM_002934358	19464	PREDICTED: Xenopus (Silurana) tropicalis Nance-Horan syndrome protein-like (LOC100498628), mRNA	2	433	742	yes	1	0	4752	MEKVPEYLYHAIPLFCLLSLQRSQTWMKKANWKCTTRPTGTSRGIFSCQTRGPRVWKSCTAMPSRVCVQYGESNGSGQIIEKEGFRARYLQPHRFPHTQQFTV
rbbp7	NM_203954	19474	Xenopus (Silurana) tropicalis retinoblastoma binding protein 7 (rbbp7), mRNA	3	533	710	no	2	94	1369	MCWFLIIPNILLNLTLVEIAVLISDLEDTRRKAMAYLGTQTLVDTFSVHQMIILFVYGT
LOC100486468	XM_002934362	19487	PREDICTED: Xenopus (Silurana) tropicalis teneurin-2-like, transcript variant 2 (LOC100486468), mRNA	2	1597	1798	no	1	0	8412	MLSTILWSAWTARRNGVLWSLQENVEVSRPWCKMKRCLSSIWMLGSGTWHFTMMAKTRRLYHSVQLF
LOC100486468	XM_002934362	19492	PREDICTED: Xenopus (Silurana) tropicalis teneurin-2-like, transcript variant 2 (LOC100486468), mRNA	2	2143	2815	no	1	0	8412	MENASAVQVGVARIVNFQEHNVQISAVDMGRTSLTQVCVAVILTGWVLIALLRYALWTVALTVFALVERAAVRKGGLGWHVTNAFATLAARNTEHAKMENVIAKRAGMGSTAPLVGKRRASKEMAALICAMAMGDAHSVRTAGSVSARPAGEGLDAMLPWKLLVLITRIMREMGLWIAWIQTAVSSQHVNQVCFAADHVTHSISYSKARQTRQQSNLSMTELNF
LOC100486468	XM_002934362	19494	PREDICTED: Xenopus (Silurana) tropicalis teneurin-2-like, transcript variant 2 (LOC100486468), mRNA	2	1831	2044	yes	1	0	8412	MVTVNVCQGSATVSQDSMEQTVQKLLVQFCAVAMDNIPKVPAYATVDGRELNVTYPSVNALTPHVVVMVLA
LOC100486468	XM_002934363	19497	PREDICTED: Xenopus (Silurana) tropicalis teneurin-2-like, transcript variant 3 (LOC100486468), mRNA	2	1306	1507	no	1	0	8127	MLSTILWSAWTARRNGVLWSLQENVEVSRPWCKMKRCLSSIWMLGSGTWHFTMMAKTRRLYHSVQLF
LOC100486468	XM_002934363	19500	PREDICTED: Xenopus (Silurana) tropicalis teneurin-2-like, transcript variant 3 (LOC100486468), mRNA	2	1540	1753	yes	1	0	8127	MVTVNVCQGSATVSQDSMEQTVQKLLVQFCAVAMDNIPKVPAYATVDGRELNVTYPSVNALTPHVVVMVLA
LOC100486468	XM_002934363	19505	PREDICTED: Xenopus (Silurana) tropicalis teneurin-2-like, transcript variant 3 (LOC100486468), mRNA	2	2227	2530	yes	1	0	8127	MAALICAMAMGDAHSVRTAGSVSARPAGEGLDAMLPWKLLVLITRIMREMGLWIAWIQTAVSSQHVNQVCFAADHVTHSISYSKARQTRQQSNLSMTELNF
LOC100486468	XM_002934361	19512	PREDICTED: Xenopus (Silurana) tropicalis teneurin-2-like, transcript variant 1 (LOC100486468), mRNA	2	1747	1960	yes	1	0	8301	MVTVNVCQGSATVSQDSMEQTVQKLLVQFCAVAMDNIPKVPAYATVDGRELNVTYPSVNALTPHVVVMVLA
LOC100486468	XM_002934361	19514	PREDICTED: Xenopus (Silurana) tropicalis teneurin-2-like, transcript variant 1 (LOC100486468), mRNA	2	2059	2704	no	1	0	8301	MENASAVQVGVARIVNFQEHNVQISAVDMGRTSLTQVCVAVILTGWVLIALLRYALWTVALTVFALVERAAVRKGGLGWHVTNAFATLAARNTEHAKMENVIAKRAGMGSTAPLMAALICAMAMGDAHSVRTAGSVSARPAGEGLDAMLPWKLLVLITRIMREMGLWIAWIQTAVSSQHVNQVCFAADHVTHSISYSKARQTRQQSNLSMTELNF
LOC100486468	XM_002934361	19516	PREDICTED: Xenopus (Silurana) tropicalis teneurin-2-like, transcript variant 1 (LOC100486468), mRNA	2	1513	1714	no	1	0	8301	MLSTILWSAWTARRNGVLWSLQENVEVSRPWCKMKRCLSSIWMLGSGTWHFTMMAKTRRLYHSVQLF
LOC100493540	XM_002934384	19697	PREDICTED: Xenopus (Silurana) tropicalis protein dpy-19 homolog 3-like (LOC100493540), mRNA	2	181	331	no	1	0	1770	MLLRYMKMIYGSQILRMLKERYLSGQNVAYIIHTTNRCFLHHLSNKALLI
tshz3	XM_002934375	19706	PREDICTED: Xenopus (Silurana) tropicalis teashirt homolog 3-like (LOC100491887), mRNA	2	40	304	no	1	174	3192	MKMWKQKTLWWMGNLQQSMHVLKKNSQRTHQITSTLQLLNFPAMKWTVIHMSARPVIAWLILKVAPSKMRRRARNLWLLLRILMSQTA
LOC100498629	XM_002934394	19752	PREDICTED: Xenopus (Silurana) tropicalis cadherin-20-like (LOC100498629), mRNA	1	705	849	yes	2	523	2911	MEPVLCSGRVHRDRAFVCRQASFRYGQWRWINQIHPFRRWSRNYVYNR
LOC100498629	XM_002934394	19753	PREDICTED: Xenopus (Silurana) tropicalis cadherin-20-like (LOC100498629), mRNA	3	1019	1184	no	2	523	2911	MVLILLPWQKCHQWVPLLSRCQQQMQMILLMEAAQGLCTAFCKDSHISLWIRKQV
LOC100498629	XM_002934394	19756	PREDICTED: Xenopus (Silurana) tropicalis cadherin-20-like (LOC100498629), mRNA	3	755	914	no	2	523	2911	MSASFIQIWTMEMDQSNTSFQEMEQELCLQSMTAQVIFMQFKDWTEKSDLSIP
pign	XM_002934389	19764	PREDICTED: Xenopus (Silurana) tropicalis GPI ethanolamine phosphate transferase 1-like (LOC100497214), mRNA	2	373	577	no	1	57	2844	MRMSVQLQKGGRRTRWSLILSSMKVNSLGVGEVLTFYLCLQKVPVETISLLIVTLLTVKILQVMMQQN
kiaa1468	NM_001127054	19769	Xenopus (Silurana) tropicalis KIAA1468 (kiaa1468), mRNA	1	1233	1518	no	3	20	3608	MLNVKEQRKGCLFNKVNVSQSARYQRISLPALNWQKSARLHSFLLHPAKPVFTLINPIGNCHLHFIRRFSLFVECQQIVAWAQRFHRLLTVKMAL
zcchc2	NM_001114221	19790	Xenopus (Silurana) tropicalis zinc finger, CCHC domain containing 2 (zcchc2), mRNA	3	1766	1982	no	2	208	3301	MTHVEKPLRRVTVLLLAPAMTGEKALKVKTRKKEIQTVIQMNPPKMVPASQLLVQLLHPLQSLFLLVMMKPV
zcchc2	NM_001114221	19791	Xenopus (Silurana) tropicalis zinc finger, CCHC domain containing 2 (zcchc2), mRNA	3	2972	3149	no	2	208	3301	MAPTSTKHIRVMEHSFLSTLLHTPMDLCMTLCLGDKPAMVCSRYQAMEGSFQGTKPLMW
phlpp1	XM_002934390	19797	PREDICTED: Xenopus (Silurana) tropicalis PH domain leucine-rich repeat-containing protein phosphatase 1-like (LOC100497530), mRNA	2	760	1006	no	1	0	4512	MFSYTGRAAAGWKHRRSLCKSRTTTSFSWALGICAGCKRRAWSQRLAASSASMQESQTVVVSLNGLNFRERIMFVKGRCSCL
phlpp1	XM_002934390	19798	PREDICTED: Xenopus (Silurana) tropicalis PH domain leucine-rich repeat-containing protein phosphatase 1-like (LOC100497530), mRNA	3	1013	1199	no	1	0	4512	MGTTASDSLWNLSNCIIGEGKPDWKDAYSTFNRWKSGRSKEAPALPGIQLIWSTESNILYLL
stk3	NM_001097196	19879	Xenopus (Silurana) tropicalis serine/threonine kinase 3 (stk3), mRNA	3	1295	1469	no	2	145	1624	MQLLHKCHGHLLWIILTNKTRKANLMITAIRICTSSTTYRKMSFLTTGRFHLMGILTF
rnf19a	NM_001123427	19906	Xenopus (Silurana) tropicalis ring finger protein 19A (rnf19a), mRNA	2	1195	1573	no	3	245	2636	MHILGEEAMEQKEKDPLATRNPGGGTGGHSTDSWNCHSCHDNWHPCICGTKDSQSLRRQRHFKAQEESGHRRWCHLVCHCVASCGSSNCRYRCSDYVSLRLWSGPHLTVPKWRLRGFCWHRQRSPD
gem	NM_001097353	19946	Xenopus (Silurana) tropicalis GTP binding protein overexpressed in skeletal muscle (gem), mRNA	1	531	762	no	3	71	968	MPTLLSTPSLTEQALRKPLSCAYNSVGRGRQRTSPLYLWAIKATLSVAERSLSQRAEHVLWCLTASSLRHQQPSNTT
pdp1	NM_001078803	19958	Xenopus (Silurana) tropicalis pyruvate dehyrogenase phosphatase catalytic subunit 1 (pdp1), nuclear gene encoding mitochondrial protein, mRNA	3	479	830	no	2	190	1771	MEKISAPSLGLTATSCQPMLQLRTGEAQLHACRAEGCCLVCLMDTPVVLVLRQLARDSSITSLFLFYLRRHCLKLKMLWKVAELCCPYYSGTSIQTITLVRRLQSCISIVYGPIGKS
LOC100491944	XM_002934415	19981	PREDICTED: Xenopus (Silurana) tropicalis protein CBFA2T1-like (LOC100491944), mRNA	1	1389	1569	yes	3	611	2363	MVYPSNPMDCPIRPHHHLSIIVWMIWPLPITTGTRTDIPTTGTSGTEIDLWGCTEHAKKK
LOC100491944	XM_002934415	19983	PREDICTED: Xenopus (Silurana) tropicalis protein CBFA2T1-like (LOC100491944), mRNA	3	2621	2780	no	3	611	2363	MLDLTSSLVFFSSWDFKLDDLIKIGFTKQQTKRLLIAVKSKGEKQKRNKKYEN
otud6b	NM_001011269	19987	Xenopus (Silurana) tropicalis OTU domain containing 6B (otud6b), mRNA	2	730	892	yes	3	50	932	MGWPVRASSPISYSEDSYRSNPGRIVTYCHWRRILQQSDHLSIYATCVWTGGAL
tmem55a	NM_001005000	19989	Xenopus (Silurana) tropicalis transmembrane protein 55A (tmem55a), mRNA	1	120	270	no	3	110	938	MGLTSAPLSFLPVPAMSPLRPLRTSSKTTCKLNCHLHIQPLPAQMPAEFL
nars	XM_002934442	20023	PREDICTED: Xenopus (Silurana) tropicalis asparaginyl-tRNA synthetase (nars), mRNA	3	1490	1808	no	2	67	1732	MWVRLSAAPCVSGIARSCWRATREKELTQRHITGTLTSANTARVRTEGMAWAWRGSSPGFLTDTTSETCACTPDSSSAASLNHLTELLRHSHWLQTSAGGQCPVFL
wdr7	NM_001097268	20030	Xenopus (Silurana) tropicalis WD repeat domain 7 (wdr7), mRNA	1	4206	4338	no	3	80	4538	MTSAQENVRIFMAIKDLLLQFPLPLTDAILLPTPTKTATSLSGR
wdr7	NM_001097268	20031	Xenopus (Silurana) tropicalis WD repeat domain 7 (wdr7), mRNA	1	804	990	no	3	80	4538	MPETIPYYVPSQVRKARHGPEGILYQRIKSSFGQKMVKVLFINFQPVAFQPVTPSALMLERQ
tcf4	NM_001102756	20050	Xenopus (Silurana) tropicalis hypothetical protein LOC100124777 (LOC100124777), mRNA	2	1084	1297	no	1	126	2121	MRWGKHLPLFILQITPTTVSHQTHQLQLGLHLLYQQAQLFGQGTEDRLPHLQTTRAHCTLYKVELRTDWKD
tcf4	NM_001102756	20051	Xenopus (Silurana) tropicalis hypothetical protein LOC100124777 (LOC100124777), mRNA	2	382	817	no	1	126	2121	MTISRRRLSTQEYKANQIEIHIPVMGGIQRCRAAISKASLEGTWKWQTQEHFRLRNPDPNTIRTQAITPGGGLFTAVQWKCKRRRSGRFHLDYPLRFMPHQQALPTTIGTRQVIHPQSQPPALFPVPSSCKMATIAVTHGVHPVE
rab27b	NM_001005681	20065	Xenopus (Silurana) tropicalis RAB27B, member RAS oncogene family (rab27b), mRNA	3	233	359	no	2	70	724	MQDQAVLMAKHSRFICNFGTQRDKNGSEVSPQRFSEMPWDSC
LOC100486082	XM_002934447	20090	PREDICTED: Xenopus (Silurana) tropicalis neogenin-like (LOC100486082), mRNA	2	1234	1429	no	1	0	3915	MHSSSSPILLSPVPASSPLLPEMWSLSWFPAALFVLAGGRLWSPEGTYRRTQYISPSKEHKGNGL
smad4.1	XM_002934439	20136	PREDICTED: Xenopus (Silurana) tropicalis SMAD family member 4 (smad4), mRNA	3	668	1274	yes	2	193	1840	MAMTMPRVSSQFLQATDIQFRLSSTHQAAGHPLSPIATHPCWHRVNPAHPIPPVSPAFLSLQQANRRVYWQRLTTTGCFPSLLCLHKGHKMASPVSQQHIIITVLQPGLEVEQQLTHLICLTIRTDIFSITHPCPILDITGLSIMNLHFSLQFQITQLLNTGAPLPTLKWTFKWERPLKFPRAVPSSLLMDTWTHPGVIGFA
LOC100488558	XM_002934456	20151	PREDICTED: Xenopus (Silurana) tropicalis protein FAM98A-like (LOC100488558), mRNA	3	1169	1973	yes	2	190	1765	MVPHKVEVAVEVEEEEAMSSHMEDEEAMNKEVDEAEEEAVEVMTMVAEEVEEAKFMVAGQTLVVTIKTVAIVIVDFNLVATKVVVTKVEEDIREVVGTKVEEAMEITKDRPILEVDTRVVAISKITDIKMVAPTVIEVVVVEAEEEDEAVGVEEETKVVDGVVEVHKTITRVGSLSSTFSMEVISIISLGLDKEDTTQVEFIESSAYNRAQVIESTCSDECCIKRIHAGFFIQFLREKLKPETCMDLTNKGVLLQLVFLRSAICHDYN
heatr5b	NM_001097232	20160	Xenopus (Silurana) tropicalis HEAT repeat containing 5B (heatr5b), mRNA	2	3151	3418	yes	1	102	6258	MAQLFLQFALHAWWVVLSCRITQTHWCRQLPSPAFSNFTCLHHVMSIYPALFRASAFTWAVLTCCCDGQLWLVSGSSHRGKQQKFVNMP
ltbp1	XM_002934457	20167	PREDICTED: Xenopus (Silurana) tropicalis latent-transforming growth factor beta-binding protein 1-like (LOC100488719), mRNA	2	1654	1801	no	1	108	5127	MCIQSLPKINLGAVSKRPWAHSAVNHFQGFQSKKTAVEQSAHPGALTNA
ttc27	XM_002934458	20179	PREDICTED: Xenopus (Silurana) tropicalis tetratricopeptide repeat domain 27 (ttc27), mRNA	1	1755	1977	no	3	200	2504	MLRPGIIYHRPTSGLNRRLRPSEHYRKQLNAIMNTGRFGRTTCSPAQMWESSPRQLKLTTDSWIYVINSKMYRF
utrn	XM_002934460	20202	PREDICTED: Xenopus (Silurana) tropicalis utrophin-like (LOC100489198), mRNA	2	9196	9322	no	1	0	10209	MMCAKVASFLEGQQRVTSYITQWWNTALLQHQGRMFGTSPRC
utrn	XM_002934460	20205	PREDICTED: Xenopus (Silurana) tropicalis utrophin-like (LOC100489198), mRNA	2	8182	8458	no	1	0	10209	MIWPVSFAPLTFSHLQKRLASWMTSTSDGSFYRQLLKSVSNNSKKHIGILDLPPNTFSLHQCSFHGNDRSHLTKYPITSTIKHKLLVGITQK
slc45a4	XM_002934474	20286	PREDICTED: Xenopus (Silurana) tropicalis solute carrier family 45 member 4-like (LOC100493215), mRNA	2	514	895	no	1	0	2193	MRQKDPSALTYLTWPTMRNRTWHLISTPSPPASVELLAICLVDWTGLRLSLGVCLNLKNKCCSSLLPLFFRCPLCFTFSASKKNSTALSRTVLKMKGTPYPATRPTQRSPMKCSQSTTSAWTSLRWT
eif2c2	NM_001004877	20291	Xenopus (Silurana) tropicalis eukaryotic translation initiation factor 2C, 2 (eif2c2), mRNA	3	2570	2876	no	2	238	2851	MSCGMTIAFHRMSCRSSLTSSATLMSVALALYLSLLQHTMLTWWHSEQGIIWWIKSMTVLKGAIHPVRVTGEISKHLLRQCRYIRTHCVRCTLRNRRCYPVT
ptk2	XM_002934477	20296	PREDICTED: Xenopus (Silurana) tropicalis PTK2 protein tyrosine kinase 2 (ptk2), mRNA	3	2552	2837	no	2	28	3352	MCGSPGAALTTWMETFSAQLGTSTYTNLLESRITRLHQRNLRALGPPATWGTFLHTTARWTATMKASSHGGSSPRRSAPRRLPTWTEPTTKSTRM
ptk2	XM_002934477	20297	PREDICTED: Xenopus (Silurana) tropicalis PTK2 protein tyrosine kinase 2 (ptk2), mRNA	3	1061	1247	no	2	28	3352	MDTVASSAEPRNLLSSGHKKKARERFHPYQSWPTARSMGSGRTQSPYQMNLVGTRLTTMQKL
trappc9	NM_001142140	20301	Xenopus (Silurana) tropicalis trafficking protein particle complex 9 (trappc9), mRNA	2	754	1045	no	1	93	3546	MRWCITTWLWSSYGPSMTLSGSEPPWKACAPHLLFTITPEAQGARLEPREGRASHCLLIPSRDTDQVHRKFSLTQVLCRLMGSIWTPAPRLAVPKIA
trappc9	NM_001142140	20306	Xenopus (Silurana) tropicalis trafficking protein particle complex 9 (trappc9), mRNA	2	1486	1672	no	1	93	3546	MSWYTLLAGWGTLPWPYGISLSFCKPCWTSCRTKRRRMWPRAWKVTPQNALAPWTPLLYQRG
vsnl1	NM_001078858	20312	Xenopus (Silurana) tropicalis visinin-like 1 (vsnl1), mRNA	3	404	605	no	2	232	805	MEMHRSLPSTHSEPLIKMATGRSISESLSVHFPSPPGEALNRNLTGLSTCMISMVTGKLQEWKCWKS
kcns3	XM_002934487	20330	PREDICTED: Xenopus (Silurana) tropicalis potassium voltage-gated channel subfamily S member 3-like (LOC100497261), mRNA	2	178	358	no	1	0	1737	MLVASSSQWIRKPYSDSLIPGWENCSTAARKKPYLNCAMTTMWRIRNITLTEILPYLDTF
osr1	NM_001008045	20340	Xenopus (Silurana) tropicalis odd-skipped related 1 (osr1), mRNA	2	406	601	no	1	324	1101	MDSQCQLSICPTYMASVPYMRCTFTSGHWDTPPFTCPDLPSPKCQEFPAWWTLASRSQRSPSFPT
pum2	XM_002934483	20362	PREDICTED: Xenopus (Silurana) tropicalis pumilio homolog 2-like (LOC100496617), mRNA	1	1143	1314	no	3	170	3695	MSSLVLKARIWMAWNRLALTHYSLTILVIRYKWTRREQVSAYLTTILNSSYFSGKTH
pum2	XM_002934483	20363	PREDICTED: Xenopus (Silurana) tropicalis pumilio homolog 2-like (LOC100496617), mRNA	1	2472	2682	no	3	170	3695	MAAAVTSLQRQGQRQSIGVLPAPPVSSVPTASFSPHPACGTTELTLCRLGAAGCWRTSGTTVFQTCSSET
pum2	XM_002934483	20366	PREDICTED: Xenopus (Silurana) tropicalis pumilio homolog 2-like (LOC100496617), mRNA	1	582	774	no	3	170	3695	MKTLQKMDRKGCSSLMNGERIHGGPLTIPCPSLLWCREDPDKAFTETMMSLLFCHLVQRAAALE
LOC100491719	XM_002934506	20435	PREDICTED: Xenopus (Silurana) tropicalis mitogen-activated protein kinase kinase kinase kinase 4-like (LOC100491719), mRNA	3	1901	2111	no	2	325	4534	MIIDSSSHHNSSPSPSSLHCPSRKGASKHTIPKNPSLIMNKQNEYERQRSALGKQTKAPLKPRLSNQEEF
LOC100491719	XM_002934506	20436	PREDICTED: Xenopus (Silurana) tropicalis mitogen-activated protein kinase kinase kinase kinase 4-like (LOC100491719), mRNA	3	2150	2441	no	2	325	4534	MEILSLLNLPCTDQWNHRYSGLIWHPSRTMYPLSRDPIPSVTLLPNLHLTFYDLRIRTKLHAVKCKVRVLTLSLKSLSQPKGFGLDQTVTRCLQGCL
LOC100491719	XM_002934506	20438	PREDICTED: Xenopus (Silurana) tropicalis mitogen-activated protein kinase kinase kinase kinase 4-like (LOC100491719), mRNA	3	4109	4277	no	2	325	4534	MWTRAQFMIFTCQHIFRAAFSHTQSSFSQILMVWNCWFAMKMKEFMLIHTAGSPKM
LOC100491719	XM_002934506	20440	PREDICTED: Xenopus (Silurana) tropicalis mitogen-activated protein kinase kinase kinase kinase 4-like (LOC100491719), mRNA	3	422	542	yes	2	325	4534	MAPMDKYIRADMSKQANLQPSKSWMLQRMKRKKSNWKSIC
rpl31	NM_001005118	20462	Xenopus (Silurana) tropicalis ribosomal protein L31 (rpl31), mRNA	2	262	424	no	1	27	402	MFHIAYVYVCQESAMRMKILLTNFTHWSHMYLSQTTKAFKPSMLMKTKWRSLLK
atp5b	NM_001001256	20471	Xenopus (Silurana) tropicalis ATP synthase, H+ transporting, mitochondrial F1 complex, beta polypeptide (atp5b), nuclear gene encoding mitochondrial protein, mRNA	3	896	1097	no	2	7	1582	MCCFLLTTFSGLPRLVQRCLPCWDVSPLLSVTSQLWPLTWVPCKRELQLQRKGQLHLCRPFMYLLMT
pan2	XM_002934530	20539	PREDICTED: Xenopus (Silurana) tropicalis PAN2 poly(A) specific ribonuclease subunit homolog (pan2), mRNA	2	1183	1378	no	1	180	3780	MCHLASKFWLLGTLVAAPTFGQTLLMQRLTPTLVTQNLHCRAWWTTCRTWIGFRILCRSHLFLCL
LOC100489964	XM_002934496	20597	PREDICTED: Xenopus (Silurana) tropicalis e3 ubiquitin-protein ligase NRDP1-like, transcript variant 1 (LOC100489964), mRNA	3	209	356	no	2	178	1129	MLTKILFAPFAVGSWRSQCKLLTASTHSAMLALPSGSLSNKPVLSTAVL
ankrd52	NM_001113035	20610	Xenopus (Silurana) tropicalis ankyrin repeat domain 52 (ankrd52), mRNA	2	2257	2437	no	1	27	3156	MCICRLLFQQTHWMQWWIIMDILPCTGLLTMGTKIVWNCYLNTTHLHTSKETLLPLCTVQ
ankrd52	NM_001113035	20613	Xenopus (Silurana) tropicalis ankyrin repeat domain 52 (ankrd52), mRNA	2	808	1000	yes	1	27	3156	MAPMSTSPMKRVSPHFTLLLSPPMGPYVWSCLSTMGLMSTSRVKKGKALCTWLQFMEGLHAPRF
cs	NM_001017313	20624	Xenopus (Silurana) tropicalis citrate synthase (cs), nuclear gene encoding mitochondrial protein, mRNA	3	536	668	no	2	292	1696	MKHLCLTLMRVSVSEATAFQSVRSCSPRLQVEKSHYLRDSSGFW
MGC75700	NM_203582	20653	Xenopus (Silurana) tropicalis adenine nucleotide translocase (MGC75700), mRNA	1	546	687	no	3	44	938	MGSRACTRDSTYLFRASSSTELLILASMIQLKVCFQIPRTHTLSSAG
fam199x	NM_001016733	20683	Xenopus (Silurana) tropicalis family with sequence similarity 199, X-linked (fam199x), mRNA	2	391	658	no	1	138	1266	MTAIPFWMTKTSHRLTCFQKAVCAVMFLPQLVLIGTGLTANLSGSCQAVILQVGVMCCQISFPAYLAPHASHPERRISTGIWMSFHGVQ
npas2	XM_002934545	20703	PREDICTED: Xenopus (Silurana) tropicalis neuronal PAS domain-containing protein 2-like (LOC100486786), mRNA	2	268	532	no	1	264	2523	MKMRKREQRGHHATNLRRREETSLMSSSKNSAPCCRAMDNHLRWTSPQYCKRPSISYRSRKKSQHRLKPARFDKTGNLLFLAMRSLLS
mtmr1	NM_001045765	20715	Xenopus (Silurana) tropicalis myotubularin related protein 1 (mtmr1), mRNA	2	1192	1312	no	1	156	2202	MPMPSHTNLLSLMPDKTVLLTLTRPKEEDMRARVHTQMQS
mtm1	NM_001015828	20723	Xenopus (Silurana) tropicalis myotubularin 1 (mtm1), mRNA	3	602	773	no	2	31	1837	MSFVTPIRLSWWCRTVLLKRILKKLLLSGPGTGFRFCLGCIQRISLLLCVAASLLWV
tmem185a	NM_001016324	20727	Xenopus (Silurana) tropicalis transmembrane protein 185A (tmem185a), mRNA	1	951	1107	yes	3	74	1127	MAIYHMIFIMKTVKMLKKRLFQSPPKLHRCFGRRLVLSLPRAQENMLCLLLN
fmr1	NM_001005454	20736	Xenopus (Silurana) tropicalis fragile X mental retardation 1 (fmr1), mRNA	3	1742	1997	no	2	208	1978	MTNHDRTTGNAIQGRQKQGHQMALYRSVLTAIMKGVYILKPCKTHLLKAADCALAKTAFKRKRRAKWWTDHKWWLMAYHNPICCK
arih1	NM_001123480	20784	Xenopus (Silurana) tropicalis ariadne homolog, ubiquitin-conjugating enzyme E2 binding protein, 1 (arih1), mRNA	1	1449	1653	yes	3	473	2060	MEVAITWYAGTRIAKQSSAGFAWVHGSLMVLLGIIVTVTMRMMQRLLEMLKRDPAQHYKDIFSTATAT
parp6	NM_001097388	20788	Xenopus (Silurana) tropicalis poly (ADP-ribose) polymerase family, member 6 (parp6), mRNA	3	1940	2075	yes	2	235	2098	MEISGSVLCLTTSARDSFLCMKMDRWGMPTLTLRTPKSRRRSCVS
tln2	NM_001123412	20826	Xenopus (Silurana) tropicalis talin 2 (tln2), mRNA	2	1657	1786	no	1	1389	5505	MPHGGRVENWLLHLGSLVKILMNSWMLALKWLDRHRIKMTKCR
tln2	NM_001123412	20828	Xenopus (Silurana) tropicalis talin 2 (tln2), mRNA	2	5026	5212	no	1	1389	5505	MQQTMVSGPRGLYPLPEWWLRQPATCANRPTPLCKAMPVRRNSSPLPSKWQPPPLSSWWPAR
rab8b	NM_001097208	20843	Xenopus (Silurana) tropicalis RAB8B, member RAS oncogene family (rab8b), mRNA	2	451	583	no	1	75	696	MTRDKYQEKKEKSLLLIMGSSSLRPVQSPVSMWRRLFSHWQETS
herc1	XM_002934553	20861	PREDICTED: Xenopus (Silurana) tropicalis probable E3 ubiquitin-protein ligase HERC1-like (LOC100493988), mRNA	2	6238	6361	no	1	0	14526	MREHVWVSLAGQYMILTIVLHQTCGFIELTVGTFITMENRH
herc1	XM_002934553	20864	PREDICTED: Xenopus (Silurana) tropicalis probable E3 ubiquitin-protein ligase HERC1-like (LOC100493988), mRNA	2	12265	12388	yes	1	0	14526	MEIMANWDMETVTVKEGQGRLKLYRGKRWFRCPVASSIQLS
herc1	XM_002934553	20866	PREDICTED: Xenopus (Silurana) tropicalis probable E3 ubiquitin-protein ligase HERC1-like (LOC100493988), mRNA	2	8716	8920	no	1	0	14526	MRSWRSTLMKRLWKRCLDRTWPVIMIFWEFGSQRYWTGQLGMYVRQMIGRRLLSVNYVKPVFSALTNT
herc1	XM_002934553	20870	PREDICTED: Xenopus (Silurana) tropicalis probable E3 ubiquitin-protein ligase HERC1-like (LOC100493988), mRNA	2	1210	1336	no	1	0	14526	MHRQSKLDSTALLLYRLMAQLEPVVKGAMEDWASEIPTTSLL
herc1	XM_002934553	20878	PREDICTED: Xenopus (Silurana) tropicalis probable E3 ubiquitin-protein ligase HERC1-like (LOC100493988), mRNA	2	1684	1879	no	1	0	14526	MWVRCPVVAHIQLPCLKMGELFGHLEEEIMVSWDMETLTEYTSPKWWKLCKECSLGKYVQGVSPH
herc1	XM_002934553	20880	PREDICTED: Xenopus (Silurana) tropicalis probable E3 ubiquitin-protein ligase HERC1-like (LOC100493988), mRNA	2	14020	14155	no	1	0	14526	MRWTDRLQQCERVCHGSFQSRFSPFLLPGNWSKWSAECLKYLWMY
znf592	NM_001078692	20933	Xenopus (Silurana) tropicalis zinc finger protein 592 (znf592), mRNA	2	310	484	no	1	282	4029	MIFWLHLISLMPQALMQRKQFNLQVMKQKTILKQQKCAWMKIYPCLSQCKLLMFLLSV
LOC100498204	XM_002934578	20972	PREDICTED: Xenopus (Silurana) tropicalis zinc finger protein 208-like (LOC100498204), mRNA	1	2505	2691	no	3	80	2834	MFGADLMEVGELIVERNAFCVLTVERVSHASHPSLYTREPTQEKSCTCVQNVARGLGLSHPS
cttn	NM_001011314	20992	Xenopus (Silurana) tropicalis cortactin (cttn), mRNA	1	486	951	no	3	50	1709	MLPSKIMPKDLEAAMVYRWIVLISQQLDLNTRQSYKNTLPKKISLKVLVENMGYRKIDRINQLTAGVTKKNYNLINHRRIIPKALGVSLGSRKTGKINLLIAGVIKKKYNLTNHKQIIPKDLEGVLEYRLTVLTSAHQDLVRLKHPALLMRRPSH
cpt1b	NM_001079298	20999	Xenopus (Silurana) tropicalis carnitine palmitoyltransferase 1B (muscle) (cpt1b), nuclear gene encoding mitochondrial protein, mRNA	3	1382	1667	no	2	55	2368	METVTTGGLISHLVWLCSVMESWVSMPSILGQMHQSLDICGSSHWQQTALNWVIQRMATAVGMLGPLFPLLTDCNGTFLQSAVRSLNALMSQLRQ
cdk14	NM_001102988	21041	Xenopus (Silurana) tropicalis cyclin-dependent kinase 14 (cdk14), mRNA	2	541	670	no	1	387	1656	MHALTLRAHPWERNLPKSDAIQAPARQQVQNLERQTLMKNWKN
ccdc132	NM_001114244	21105	Xenopus (Silurana) tropicalis coiled-coil domain containing 132 (ccdc132), mRNA	2	1501	1693	no	1	105	2997	MRPGNFAQSSQVLAFCSYMNSNAWGSLALHLCHQVSKPLPLSRQQCRCLNSTPMEETLLRYRLL
pde11a	XM_002934600	21142	PREDICTED: Xenopus (Silurana) tropicalis phosphodiesterase 11A (pde11a), mRNA	3	1340	1505	no	2	772	3448	MPIAVLFSWWKGRLTRRVWCPSFSTCTQGPLCCLRAVRRTQMRFRCHGARALLVM
LOC100497376	XM_002934615	21162	PREDICTED: Xenopus (Silurana) tropicalis integral membrane protein GPR155-like (LOC100497376), mRNA	3	146	395	no	1	0	2214	MFWHHHVWIHCWKSEYHKCNASQRTGQLCLPFCASCFVVQEHGGARFLRCQLVISLQHPHCQSFCVCNSLCADIISGESADSI
ola1	NM_001008043	21174	Xenopus (Silurana) tropicalis Obg-like ATPase 1 (ola1), mRNA	3	1484	1706	no	1	75	1263	MIKTLLQSTEASLQPPKSHDSSLISIMYAKADTSDRKDNVRRSVRNLQIMHVLQYSRCRHSIKHLTKKKKKKKK
dnah11	XM_002934616	21192	PREDICTED: Xenopus (Silurana) tropicalis dynein heavy chain 11, axonemal-like (LOC100497531), mRNA	2	11809	12133	no	1	0	13239	MLLKLPTNPRLECWQISTLLWITLIRTSLINALESRSLRASYSLCAIFMLALPSAESLGPKGGTGNTPLISETLQYLSVFYTTIWRQMPRCLGKICATCSGRLCTAVI
slc25a12	NM_001016920	21245	Xenopus (Silurana) tropicalis solute carrier family 25 (mitochondrial carrier, Aralar), member 12 (slc25a12), nuclear gene encoding mitochondrial protein, mRNA	2	85	283	no	1	282	1767	MLRKSLDRPSFTTISLSTGTASLFVFILGTIGRNTFLIWNSQSFSRSCSWNMQDRRLLRKTKTKAE
slc25a12	NM_001016920	21247	Xenopus (Silurana) tropicalis solute carrier family 25 (mitochondrial carrier, Aralar), member 12 (slc25a12), nuclear gene encoding mitochondrial protein, mRNA	2	1372	1699	no	1	282	1767	MSSRPDFRWLLEPDRPHTLGLLTASERSYKRKEEERCGREQEPECSAPPPSLASPWSLMSCYSGGFMLILEESNLPVLSLLQRPESPTFLLPIQTILVVTDWPQQHLLA
dync1i2	NM_213683	21252	Xenopus (Silurana) tropicalis dynein, cytoplasmic 1, intermediate chain 2 (dync1i2), mRNA	3	1484	1673	no	2	160	2071	MSTTLWWEARKVQCTQHVATAAKPVSVRCLRATKDQSQGYIAIPLSELSTSHICLSLLLLIGQ
tlk1	XM_002934620	21260	PREDICTED: Xenopus (Silurana) tropicalis tousled-like kinase 1 (tlk1), mRNA	2	3331	3589	no	1	0	2460	MQDNDKFPSGTHVYCCTDVHFSYPCPFSSRLPLYKCLKYGFFSNLNFDFFFFCLLDCAFILLLINVALSLFFFFVFFCKPIELPLF
ubr3	XM_002934622	21281	PREDICTED: Xenopus (Silurana) tropicalis e3 ubiquitin-protein ligase UBR3-like (LOC100498471), mRNA	2	1585	1738	no	1	0	5265	MLHLLLNLKPVPSPCGDFYRTAKFQIHKNTHEMLFDIALKLFRIGLMLSIL
ubr3	XM_002934622	21283	PREDICTED: Xenopus (Silurana) tropicalis e3 ubiquitin-protein ligase UBR3-like (LOC100498471), mRNA	2	5119	5269	no	1	0	5265	MHMGRKTETLGAESPCTSVRKGTACWSSNGSRTRLITSIRDGGRITMACX
ubr3	XM_002934622	21287	PREDICTED: Xenopus (Silurana) tropicalis e3 ubiquitin-protein ligase UBR3-like (LOC100498471), mRNA	3	5000	5147	no	1	0	5265	MCIALPKLWSRHWNFPLDQRFCHHYYSRPSLLPLGLCISRCTWGGRQRP
mettl5	NM_001030492	21291	Xenopus (Silurana) tropicalis methyltransferase like 5 (mettl5), mRNA	1	111	255	no	3	71	695	MCLKTPNYSWSSTRQGRTLQPACCTQSIILSMTLKTKWLQILVAAVGC
ppig	NM_001001234	21307	Xenopus (Silurana) tropicalis peptidylprolyl isomerase G (cyclophilin G) (ppig), mRNA	2	445	574	yes	1	198	2406	MEEVANLFMEGSLKMKTSPFSTTKNSYSQWPTEERTQMDHNFL
LOC100490990	XM_002934625	21341	PREDICTED: Xenopus (Silurana) tropicalis AP-2 complex subunit alpha-1-like (LOC100490990), mRNA	2	604	730	no	1	264	3195	MPLKTTWPAGTLLLCAWPCTALQMWGAEKWPKRLPLRYQGFW
nr1h2	NM_001079385	21367	Xenopus (Silurana) tropicalis nuclear receptor subfamily 1, group H, member 2 (nr1h2), mRNA	3	380	539	no	2	229	1552	MRMRCRELMERAPPRVLQRSQSGNGKRVLLQRCWGMKFAACAGTRLQAFITTC
gbp6	NM_001127156	21435	Xenopus (Silurana) tropicalis guanylate binding protein family, member 6 (gbp6), mRNA	1	339	465	no	3	143	2027	MMDLLWGPPSSPRPKASGCGVFLTHTNLGTPWYCWTRRDWGM
hmgn2	NM_001011031	21485	Xenopus (Silurana) tropicalis high-mobility group nucleosomal binding domain 2 (hmgn2), mRNA	2	49	313	no	1	30	306	METPRSRSQRLRTSHRGDLPGYRLSLPHRNQSPNPRRLLFLQRKLKRHPKARKGRQTLVKIAVMQLRMEMPNQIRHKRQRQLGIQSEA
arid1a	XM_002934640	21497	PREDICTED: Xenopus (Silurana) tropicalis AT-rich interactive domain-containing protein 1A-like, transcript variant 2 (LOC100493385), mRNA	2	2866	3097	no	1	129	5625	MPLNAKLREEKIHHRTSLPLLNPRSKPRSSPLHQLALALCRGHRPLSLQAVRWLKEETLNLQRQHQLLIAICHLCLV
arid1a	XM_002934640	21498	PREDICTED: Xenopus (Silurana) tropicalis AT-rich interactive domain-containing protein 1A-like, transcript variant 2 (LOC100493385), mRNA	2	4639	4810	no	1	129	5625	MSLAAKMKPHCAHWRIGRMLCPDVVCAYPTSCVACPLCQAMTWKCPNTLGCCCYWES
arid1a	XM_002934639	21508	PREDICTED: Xenopus (Silurana) tropicalis AT-rich interactive domain-containing protein 1A-like, transcript variant 1 (LOC100493385), mRNA	2	2866	3097	no	1	129	6294	MPLNAKLREEKIHHRTSLPLLNPRSKPRSSPLHQLALALCRGHRPLSLQAVRWLKEETLNLQRQHQLLIAICHLCLV
arid1a	XM_002934639	21509	PREDICTED: Xenopus (Silurana) tropicalis AT-rich interactive domain-containing protein 1A-like, transcript variant 1 (LOC100493385), mRNA	2	5308	5479	no	1	129	6294	MSLAAKMKPHCAHWRIGRMLCPDVVCAYPTSCVACPLCQAMTWKCPNTLGCCCYWES
arid1a	XM_002934639	21512	PREDICTED: Xenopus (Silurana) tropicalis AT-rich interactive domain-containing protein 1A-like, transcript variant 1 (LOC100493385), mRNA	2	3517	3964	no	1	129	6294	MIPMGTSIPRRAQLQAAPILANRILCTSNRTTKGQWMVVMDLLQNVMKVNCMVAHTVVGKLGRTNSSPSHHLSNSSPQGLEHPLPLDSLLQPRTLSSHRTPMGSTEAAIPREQNADQLPVDRTNFLSSLGVKECLLLLVVTPNHLCHPV
wasf2	NM_001103026	21555	Xenopus (Silurana) tropicalis WAS protein family, member 2 (wasf2), mRNA	1	1344	1494	no	3	29	1463	MRSEMLVGMMWPPSCLVELQWNIVTLRMILLNLMKMIGLIETLMKETKGK
LOC100124862	NM_001102820	21626	Xenopus (Silurana) tropicalis hypothetical protein LOC100124862 (LOC100124862), mRNA	3	1895	2036	no	2	184	3457	MAMNISMWTQCSFLMTLGGSSKGMDLFLVASLALGLLGKWLKAQHMG
clock	NM_001128655	21655	Xenopus (Silurana) tropicalis clock homolog (clock), mRNA	3	284	611	no	2	262	2749	MTVVFLMDLWKKMTRIKQRGCLGTNRRKGEEISSIFSLRSLALCCQAMPEGWTNPLCCRKALTSYGSIKKLVHSRMLVKYDKTGNLRSLVMRNLLNSCWRHWMDFSWQL
LOC100488302	XM_002934674	21705	PREDICTED: Xenopus (Silurana) tropicalis putative methyltransferase KIAA1456 homolog (LOC100488302), mRNA	1	57	258	yes	3	107	1415	MGTLLSIGCDRGASLSEWNMKLPNLKSNMFIVCMKAQPLISTKCKVKPGQRCASFFWNKSLAVSLWT
dlc1	XM_002934675	21717	PREDICTED: Xenopus (Silurana) tropicalis rho GTPase-activating protein 7-like (LOC100488460), mRNA	2	1378	1570	no	1	0	4380	MKMNHVQSVVNGHFKGTARGGLDWKNLKSFLLLKDQKLYCQTHTSWEMQSARTVFLLTLVSTKM
dlc1	XM_002934675	21721	PREDICTED: Xenopus (Silurana) tropicalis rho GTPase-activating protein 7-like (LOC100488460), mRNA	3	2798	3104	no	1	0	4380	MAQLPELPPSQFKFCFIADELPVRDSDQLASEVFPLKANGSPGKIYPFQQARVQLGRAKIYETRESSRLQGPKRVWRSSCNKCTAHWSAIATKHPAGHALST
LOC100490934	XM_002934678	21733	PREDICTED: Xenopus (Silurana) tropicalis hypothetical protein LOC100490934 (LOC100490934), mRNA	3	179	527	no	1	0	687	MSRTWDQGMPRTWDQDLSRTWNQGMYRTWDQGLSRSWDQDLSRTWDQDLSRTWNQGMYRTWDQGLSKTWNQGLSRTWDQGMYRTWDQGLSRTWNQGLSRSWDQDLSRTWDRGLSRT
ubr2	XM_002934690	21753	PREDICTED: Xenopus (Silurana) tropicalis ubiquitin protein ligase E3 component n-recognin 2 (ubr2), mRNA	3	5093	5237	no	2	4	5263	MTMERQIKASDAETPCTSVRNATKRSRSCGSSTVLQRKLAMPKKPIRL
ubr2	XM_002934690	21757	PREDICTED: Xenopus (Silurana) tropicalis ubiquitin protein ligase E3 component n-recognin 2 (ubr2), mRNA	3	140	392	no	2	4	5263	MYPKFTVKAPTQLQKMRTWWSSTFCWALWSGICAARTLQLDFQSLSKPTSHLSCVAGYLKWESQHIHAGTVQSTQHAFYAWSVF
LOC100491443	XM_002934681	21765	PREDICTED: Xenopus (Silurana) tropicalis uncharacterized protein KIAA0240-like (LOC100491443), mRNA	2	250	382	no	1	0	3942	MMNLKPPLFMISMKTNPLTFFKNHCKWPISPNRHWQKRLIWTTV
angel2	XM_002934703	21829	PREDICTED: Xenopus (Silurana) tropicalis angel homolog 2 (angel2), mRNA	1	762	930	no	3	161	1739	MQIYFVYKKFKKITTQPRSSPVWKVLGTTASTRHELEVSQTAAPFASRLISSPWCL
prox1	XM_002934704	21841	PREDICTED: Xenopus (Silurana) tropicalis prospero homeobox 1 (prox1), mRNA	2	2086	2221	no	1	0	2217	MPLSQAKTLILLGRRPSTRSSASWTARSRTSSGRPTASRNFSTSX
zbtb17	NM_001011141	21876	Xenopus (Silurana) tropicalis zinc finger and BTB domain containing 17 (zbtb17), mRNA	1	1458	1806	no	2	43	2440	MQRMREAVYHVREPEETPADTQRGEAVRVCALQEEVCGSRSAAAPRPDSHRGEAVPVYDLRQSLHPGQLPNRPRAPAHRGEAVRLRALREEVCAVEPAGQSHPPSRQHSAAQVQCV
zbtb17	NM_001011141	21878	Xenopus (Silurana) tropicalis zinc finger and BTB domain containing 17 (zbtb17), mRNA	3	851	1109	no	2	43	2440	MNWPQTRGIPSTWDLAQLPTRIGMSPGPTAPLLTSVSTVAKNSPIRATTPGTSAPTLGRSPSPAASATRRSPTRRPAEPTRRLTAP
spen	NM_001017062	21883	Xenopus (Silurana) tropicalis spen homolog, transcriptional regulator (spen), mRNA	3	602	1307	no	2	235	1111	MHGKDVMNGDSMGLLKLGSDLMNTVPMDTMSAGQDLIGHGITIRITIEKRGNGPYSMGYTITLGEALPDLTLTIPAMKLGLESSLHYPVLCTGIFSEANFHGRYEGDGLNGITSTAGAGHPIHPSLGTSPLKGWLAKRQGQPDLPAAADPGVDPLVVTLSAAAVVPVVTGRSDSVTEPLLIHGLHLCWADGSVSYILRKAGQPLPSLSPLPGRSVSRQSNRNRKRKGFWNPLSKK
spen	NM_001017062	21884	Xenopus (Silurana) tropicalis spen homolog, transcriptional regulator (spen), mRNA	3	320	524	yes	2	235	1111	MDVSKVSKFCPRGDLTVAWPHLWILWISKVHRRRTMPLIKWETETFERITMNQAPFRVLLEFWMIQFP
luc7l2	NM_001016024	21965	Xenopus (Silurana) tropicalis LUC7-like (S. cerevisiae) (luc7l), mRNA	3	572	857	no	2	184	1300	MKKLGNCWPKLSNWELKEMWKSHKKSWMKLKRPESGKEKLRKSTVIPCLHPVFNSKSYVSVKSALPTWVFMTMTEDWLITLVESCIWDSLKYVRN
luc7l2	NM_213685	21969	Xenopus (Silurana) tropicalis LUC7-like 2 (luc7l2), mRNA	1	603	888	no	3	218	1181	MKKLGNCWPKLSNWELKEMWKSHKKSWMKLKRPESGKEKLRKSTVIPCLHPVFNSKSYVSVKSALPTWVFMTMTEDWLITLVESCIWDSLKYVRN
rbfox2	NM_001008084	21975	Xenopus (Silurana) tropicalis RNA binding motif protein 9 (rbm9), mRNA	3	248	602	yes	2	142	1282	MDYPQTMEASTHRNTLLSPLSMGFPCTEEGRAMQSTAPQLPALPMLPARQMDHRQKDSSPRHKTVKTANPNLPQSGFMFRTSLSDSGTQTCAKCLDNLAKFLTWKLYLTSEAPRVLVL
rbfox2	NM_001008084	21976	Xenopus (Silurana) tropicalis RNA binding motif protein 9 (rbm9), mRNA	3	986	1292	no	2	142	1282	MVLCGRYLLLLSPHILVCYIRMDFMALNYMVDMQHTDILSQPQPPQLPPPLQLPQQPTAMGMAEYTQLTHITPWPLLPVTEWELWRVYTEAVTADLLRTEVT
st13	NM_001004975	22028	Xenopus (Silurana) tropicalis suppression of tumorigenicity 13 (colon carcinoma) (Hsp70 interacting protein) (st13), mRNA	1	843	1098	no	3	68	1214	MRKHKEKKRLGVRQEHSLVDSQVGSLVECLAWEEWAECLAWEEWAECLAWEEWAECLAWEEWAECQGSVKFYQIQKCWQPCRTLR
ep300	XM_002934725	22041	PREDICTED: Xenopus (Silurana) tropicalis E1A binding protein p300 (ep300), mRNA	1	6033	6348	no	3	1058	8486	MPSSRLLEINTWSFHLCAELSGLQCACWWNSIHRARTALSTPAMSASTMLKRAGTVLFVRIMICASPATTQRRMSTKWRNLGLAWMMRAITNKQQQPKALEILAG
ep300	XM_002934725	22042	PREDICTED: Xenopus (Silurana) tropicalis E1A binding protein p300 (ep300), mRNA	1	5682	5988	no	3	1058	8486	MCWKRALRNWSRRRKKGSEKKIPAMRVLRLGKETVKMQKRKTTRRQAKTRAVLVEGVRRSLECQMCPMTYPRSSMLQWKSIKRYFLSSALVLDPQQILFPQL
ep300	XM_002934725	22043	PREDICTED: Xenopus (Silurana) tropicalis E1A binding protein p300 (ep300), mRNA	1	5250	5433	no	3	1058	8486	MELNCVFLECTCKNMALTVPSPIKGGFIFPIWTVYISFGQRTLEQLCIMKFSLAIWSMSRD
LOC100490882	XM_002934736	22051	PREDICTED: Xenopus (Silurana) tropicalis lethal(3)malignant brain tumor-like protein 2-like (LOC100490882), mRNA	2	172	451	no	1	0	1557	MKRKMKGLHHCSNHLLALTRPMRRIVLNQLFVRCAGLWAHVEPSSPKQRDSVMSPVHVAIPPTPRKPVFWPGCRASHRQGKQKYYIRHPGLPK
LOC100490882	XM_002934736	22052	PREDICTED: Xenopus (Silurana) tropicalis lethal(3)malignant brain tumor-like protein 2-like (LOC100490882), mRNA	2	736	1003	no	1	0	1557	MKVLKKTRAITTGATWEQWKFIPLDAILSKFTDWREYLMKKLVGSHTIPADFHVKMAESFRCPFRQGMRLEAVDKMKMSRMRSAVVDTT
ddx47	XM_002934729	22062	PREDICTED: Xenopus (Silurana) tropicalis DEAD (Asp-Glu-Ala-Asp) box polypeptide 47, transcript variant 1 (ddx47), mRNA	3	62	212	no	2	37	1381	MWLRTEKRSRKLSESWESQMCYVKPVSSWDGNSQPRFRLRQFLWPCKVEI
ddx47	XM_002934731	22065	PREDICTED: Xenopus (Silurana) tropicalis DEAD (Asp-Glu-Ala-Asp) box polypeptide 47, transcript variant 3 (ddx47), mRNA	3	62	212	no	2	37	1243	MWLRTEKRSRKLSESWESQMCYVKPVSSWDGNSQPRFRLRQFLWPCKVEI
ddx47	XM_002934730	22068	PREDICTED: Xenopus (Silurana) tropicalis DEAD (Asp-Glu-Ala-Asp) box polypeptide 47, transcript variant 2 (ddx47), mRNA	3	62	212	no	2	37	1234	MWLRTEKRSRKLSESWESQMCYVKPVSSWDGNSQPRFRLRQFLWPCKVEI
glrb	NM_001078787	22089	Xenopus (Silurana) tropicalis glycine receptor, beta (glrb), mRNA	3	1607	1820	no	2	304	1795	MTVMGNQLKSTMDWENPKRRTTKSLHLPSQSFHQKRSELIFTPGHYFHSAFCSLMLYIGWYIYDSTVSSFE
gria2	NM_001142067	22092	Xenopus (Silurana) tropicalis glutamate receptor, ionotropic, AMPA 2 (gria2), mRNA	3	1943	2099	yes	2	208	2509	MEEKHKVTSHLMSLGYLIVSGFPLVPLCGKDAIFRQDLCPVALLEVCGGSLP
rapgef2	NM_001127050	22132	Xenopus (Silurana) tropicalis Rap guanine nucleotide exchange factor (GEF) 2 (rapgef2), mRNA	2	4519	4882	no	1	366	5301	MQQIVAVEAGLHVPADPMITYKLSHIREAGRLFLLVMFILITQLMGQGFGPQVATWTTGYFLIIAQNMADTAKEENLWIKHSQEPAGHHQQATGARTQKVIPAPLREEVGKMWPLKLKPAV
rapgef2	NM_001127050	22136	Xenopus (Silurana) tropicalis Rap guanine nucleotide exchange factor (GEF) 2 (rapgef2), mRNA	2	4132	4330	no	1	366	5301	MHPRSFHPLRHPRSALQGKVTQWQLVAQWITSLIQGTVKSPPAPALSVTLLLTACTCTMTGGRGIP
klhl2	XM_002934752	22171	PREDICTED: Xenopus (Silurana) tropicalis kelch-like protein 2-like (LOC100495582), mRNA	2	1087	1219	no	1	0	1890	MISKRSSGTSWLNCHQGDADQVWCTCLAMYLLLEDLMAHLGCAQ
msmo1	NM_001079341	22175	Xenopus (Silurana) tropicalis sterol-C4-methyl oxidase-like (sc4mol), mRNA	3	632	833	no	2	184	1066	MLGTISFTESCTTNGYTNIFTKCTMSSRPLLGCKLNMPIHWKPLYLGLAFSLESWCSAITLFSCGHG
cpe	NM_001112946	22177	Xenopus (Silurana) tropicalis carboxypeptidase E (cpe), mRNA	2	523	658	no	1	267	1653	MSPVNQNLNMLVICTETKLLEESCFYILPSICAMSTRGKMKPLSI
tbck	NM_001102743	22183	Xenopus (Silurana) tropicalis TBC1 domain containing kinase (tbck), mRNA	3	1931	2270	no	2	94	2734	MKLALFQISTQFLGFLQCSRMFFLCTRYSISGTHCCWGMLHSHFALEWPFCNSYESGFLRMVLMNAFFCFPICQKLTLSAVSVSLLIYFAGHQRVQHTDSMHRCQSRSLKVMG
tet2	XM_002934777	22207	PREDICTED: Xenopus (Silurana) tropicalis tet oncogene family member 2 (tet2), mRNA	2	4780	5083	yes	1	306	5517	MVNILFHTPSRVMKATCHQVYWEAELVLCHSLVNRVKCIHAQQMEHRKCFQVLTMIELILEAQAELMVLMFRESYRTPYLLYQKSLQKFGQTVNRIFLILI
ppp3ca	NM_001126508	22246	Xenopus (Silurana) tropicalis protein phosphatase 3, catalytic subunit, alpha isozyme (ppp3ca), mRNA	2	781	1015	no	1	111	1674	MDLCVTFCGQIHWKTMEMKKVKNISLTTQLEVAHIFTAIQLSVNFFSTIIYYLYFELMKPRMLGIVCIEKAKQQASLP
ppp3ca	NM_001126508	22247	Xenopus (Silurana) tropicalis protein phosphatase 3, catalytic subunit, alpha isozyme (ppp3ca), mRNA	2	1549	1717	no	1	111	1674	MKGCHPVEMLCLQMPTLTQSTRLFLQRPMVLTAMAVTAAIFSDHFLLMKYFCSCKA
rab8a	XM_002934795	22354	PREDICTED: Xenopus (Silurana) tropicalis RAB8A, member RAS oncogene family (rab8a), mRNA	3	536	872	no	2	160	781	MKSDKFPKRRVKSWPLNMELSSWRQVQRQISMWKMHFLHWQETSKQKWIRGWRGTALKAVTKESKSPKTSKRRAVFSDVSFCEGYCLIGVLCSIKLDCACILIPIVFADIKT
rab8a	XM_002934795	22355	PREDICTED: Xenopus (Silurana) tropicalis RAB8A, member RAS oncogene family (rab8a), mRNA	3	317	509	no	2	160	781	MAKELSCRYGIPQDRNGFVQSPLHITEGRWELCWCMISPMKNPLTILKTGSETLKNMHPLMLRK
rab3a	NM_001016426	22402	Xenopus (Silurana) tropicalis RAB3A, member RAS oncogene family (rab3a), mRNA	3	347	512	no	2	43	703	MISRTRSHSTLCRTGQLRSRRTPGTMHRFYWLGTNVTWKMKELCHLKEEGNWQSI
sall1	NM_001097177	22409	Xenopus (Silurana) tropicalis sal-like 1 (sall1), mRNA	2	3538	3790	no	1	111	4101	MHVGNHSLLPVLYKSMSGLTLVKNHLPALYVEEHLLQKATLRFIWELTCGTAHLQEEEEGFQLMDLWLFLEETLLSSLKCSRRI
sall1	NM_001097177	22412	Xenopus (Silurana) tropicalis sal-like 1 (sall1), mRNA	2	496	706	no	1	111	4101	MTQLITQIKQTAVTFQSMVSTASLTKKNPWRWSFRKLTIAAVVLTKWTMVIQAVIIPHWVPQLSQLRYLK
sall1	NM_001097177	22414	Xenopus (Silurana) tropicalis sal-like 1 (sall1), mRNA	2	271	415	no	1	111	4101	MKETQRGVKSIGRPRTRRRMSVADVVQSSLNYQICCSTRRTALKINWF
sall1	NM_001097177	22415	Xenopus (Silurana) tropicalis sal-like 1 (sall1), mRNA	2	1477	1672	no	1	111	4101	MRHSLNTSVDSVLRFLAVTVPCRSIYVLTPARDHLNATFVETGFPPKGILKFIFSVTKRNIPIFR
LOC100490480	XM_002934829	22452	PREDICTED: Xenopus (Silurana) tropicalis hypothetical protein LOC100490480 (LOC100490480), mRNA	2	2380	2617	no	1	87	2736	MSPLSTVLPSLLWCRPRQQAHLTHLRLLFWYLAQYLNNQESKGVKKSRKESGLLMAFYLMGKLQTQPNFHLLSRDPHKT
map1b	XM_002934819	22535	PREDICTED: Xenopus (Silurana) tropicalis microtubule-associated protein 1B (map1b), mRNA	3	3410	3578	no	2	205	6982	MMKLCQVVLKVRQLFLMKKIEKINQKNLLLLQDLLILPLKYPVNPLQWMICLLLEM
map1b	XM_002934819	22544	PREDICTED: Xenopus (Silurana) tropicalis microtubule-associated protein 1B (map1b), mRNA	3	4943	5150	no	2	205	6982	MKQKCHHLEMSAPDQCLFLHQISPPRLENHPFYCMNRGHQNSPQWSLVKNHQNNLLQWILASSLQSILQ
LOC100492001	XM_002934838	22554	PREDICTED: Xenopus (Silurana) tropicalis transportin-1-like (LOC100492001), mRNA	3	971	1133	no	2	10	2854	MLKRMKLFLIVNRISGHVFIDRGRWLNLMRKMGLRKMMMMTMNLMMMRTYLIGI
enc1	XM_002934824	22602	PREDICTED: Xenopus (Silurana) tropicalis ectodermal-neural cortex (with BTB-like domain) (enc1), mRNA	1	1956	2094	no	2	265	2032	MEQYNHCTLLSYSYGICQHMETLAFLKHYTVMTQDLSCEDWRRANR
enc1	XM_002934824	22608	PREDICTED: Xenopus (Silurana) tropicalis ectodermal-neural cortex (with BTB-like domain) (enc1), mRNA	3	575	842	no	2	265	2032	MHTPPESSSMKKMQSLFLKLEICWSSRISEMHVQSSWRKTFTRPTVWVCCSSLMPISALSCMSCPGECALTTSKPSAKLKTFFCCLKTW
enc1	XM_002934824	22611	PREDICTED: Xenopus (Silurana) tropicalis ectodermal-neural cortex (with BTB-like domain) (enc1), mRNA	3	1571	1835	no	2	265	2032	MQQWLVQSSNFLHLEELVLATTSCPKFNAMTPLKTDGRYQLLALSLGATQRLQYWEHRYSSWGVTQNSRPAPLTNSTVRLTSGQKQEM
hmgcr	XM_002934844	22633	PREDICTED: Xenopus (Silurana) tropicalis 3-hydroxy-3-methylglutaryl-Coenzyme A reductase (hmgcr), mRNA	1	330	468	no	2	124	2539	MHRHPLYLFPVPEPQAARLKIHFRDCWAFHHLLKLCLQHSGHSLPR
col4a3bp	NM_203513	22640	Xenopus (Silurana) tropicalis collagen, type IV, alpha 3 (Goodpasture antigen) binding protein (col4a3bp), mRNA	2	529	964	yes	1	168	2019	MDQNPVYGGMAQWCPSCLGQVVTLPHPRHHLRKDTACGRNWRKWRLSETSYADRLTRCRNILMRVQMQFPKMSLKGIKLKTMKMIFFIAIPMEITFIAVLGVKINYSSTCLQRALMALTLKEKPSHLKLPLQEYWLLCRTALISW
iqgap2	XM_002934845	22661	PREDICTED: Xenopus (Silurana) tropicalis IQ motif containing GTPase activating protein 2 (iqgap2), mRNA	3	149	272	no	2	142	5305	MRRSPRCSDPDMAQSLMMKGFLQRKWMKGGGRTLLMSIYAI
LOC100497103	XM_002934860	22676	PREDICTED: Xenopus (Silurana) tropicalis collagen alpha-3(IX) chain-like (LOC100497103), mRNA	2	310	478	no	1	0	1641	MVKGVIVGIQASRDYQGQMVLKGWQAHQESGGQLGKKQIRDKKERLDLKESQDSEE
bmp5	XM_002934847	22684	PREDICTED: Xenopus (Silurana) tropicalis bone morphogenetic protein 5-like (LOC100494976), mRNA	3	572	803	no	2	517	1864	MLCALCLETMSTPASSTEDSGIMKERRFKGKSCLFWVYPTDPDHSPPGNRPLLPHFSCWTCTTLWLRKMTTACWGTH
lrrc1	NM_204055	22701	Xenopus (Silurana) tropicalis leucine rich repeat containing 1 (lrrc1), mRNA	2	304	448	no	1	267	1839	MWSPWIRDTAPCSQSRRRFIDTAGVWRSCSWTPTNCGNSPSNFSNLLS
pnisr	NM_001083345	22756	Xenopus (Silurana) tropicalis splicing factor, arginine/serine-rich 18 (sfrs18), mRNA	2	349	655	no	1	168	1086	MGRIFHQWSQDLTIMAVFREIQILIECGSLNGQVCIINHLHITLRLNSHGCLLPQLQWMLFLYLRTAIARTVESLLLRTDICLTRIITTLGGLLLKTFQWDQ
pnisr	NM_001083345	22759	Xenopus (Silurana) tropicalis splicing factor, arginine/serine-rich 18 (sfrs18), mRNA	3	1436	1640	yes	1	168	1086	MDQKKVKMIGVTEAQNHLILMKKSYNTEYVKSRKPFGEKKESSRYLKGSWKKKNNKRNQKKMNQVSLR
pnisr	NM_001083345	22760	Xenopus (Silurana) tropicalis splicing factor, arginine/serine-rich 18 (sfrs18), mRNA	3	2435	2690	yes	1	168	1086	MARKAPPKKVRNALHLVEGAVQNRLLSTRIKRLRNQNAADHILWRSRKGLVRRQAANTSLRPDQDHQLLYAANADLICLRRHYYV
LOC100486226	XM_002934872	22766	PREDICTED: Xenopus (Silurana) tropicalis hypothetical protein LOC100486226 (LOC100486226), mRNA	2	1897	2173	yes	1	0	2556	MGSGMPTTTTMASTGTSHPPRRSNNTPSSRGGTTITRTRTPRLRMTWSSLPSSSSRGGSSWDLHRRTLGWPWAPSMAMSSLRPRSVGSRPCS
klhl32	NM_001016857	22785	Xenopus (Silurana) tropicalis kelch-like 32 (klhl32), mRNA	3	1415	1574	no	2	430	2074	MQLVVEMNCGKFCHQWNDTALRRISGLLHSPLTDPFHVMPDVWLMAFCGYQVE
fhl5	NM_001123485	22790	Xenopus (Silurana) tropicalis four and a half LIM domains 5 (fhl5), mRNA	2	94	349	no	1	24	870	MTFHIVLNALTAFLQTSVKDAKNLLNVILRTLHIKTATGMKHVSNATSVTILWWRNPLLPKMSYYCASSVTLLNTPQSVLAAELP
LOC100486526	XM_002934874	22803	PREDICTED: Xenopus (Silurana) tropicalis ephrin type-A receptor 7-like (LOC100486526), mRNA	2	199	319	no	1	0	2994	MKITHQLELIKYVRSWSQTRTTGCGLTGFLKGMHRGFLLN
LOC100486526	XM_002934874	22804	PREDICTED: Xenopus (Silurana) tropicalis ephrin type-A receptor 7-like (LOC100486526), mRNA	2	724	1027	no	1	0	2994	MQRKKQIIHLGCIAVLKENGWFLLESAYAKLDTSKKETPVNRVVEASTNHHLKIYSVLDALHTVSQTRKAHPVVTVKMAITELSQIHHILLAQDHHLHHKI
fli1	NM_001102719	22824	Xenopus (Silurana) tropicalis Friend leukemia virus integration 1 (fli1), mRNA	3	1283	1457	no	2	208	1585	MVNVMPTNLTFMALLRHCSLIQLILQCTNTLQSSHTCLLTIHINRRSILSLHTHPLCR
prdm10	NM_001142069	22858	Xenopus (Silurana) tropicalis PR domain containing 10 (prdm10), mRNA	1	249	519	no	3	224	3743	MCGLLLWSTSQILLRYILFLMADLWLRSCTVMIKIVLSSRWSTQQMPHRLHLWMHLNIRWCISTQWMDRRLSLQTSLRLPMYSRMLPHSR
dlg3	XM_002934881	22894	PREDICTED: Xenopus (Silurana) tropicalis discs, large homolog 3 (dlg3), mRNA	2	2485	2779	no	1	504	3015	MMTSFLNFHINLDPVFPTQRGREGKMKWMDKIITLWVPVSRWRRTFRKTSSLRPDNSMTTFMGRVFSLYEQWLSGESTASLMYLEMPSRDYNKHNCSP
slc7a3	NM_001123486	22905	Xenopus (Silurana) tropicalis solute carrier family 7 (cationic amino acid transporter, y+ system), member 3 (slc7a3), mRNA	1	204	390	no	1	492	1158	MPDHIGSDCPWGWQHSWSWGICSSRGSSKKVSRTFHCPLFPRCSLVFCVGWSVLCRVWSKSA
snx12	NM_001016954	22938	Xenopus (Silurana) tropicalis hypothetical protein LOC549708 (LOC549708), mRNA	3	362	656	no	2	43	529	MKGYLKSHLLKKESRAWNSLLTRLPDTPLPRMNGVCICSCKMKQLIGIMCQAKCANKGQRQIPPHLLLPLTSSSPAKLHIFLHYSHLNSLLCHVSLCL
snx12	NM_001015790	22942	Xenopus (Silurana) tropicalis sorting nexin 12 (snx12), mRNA	2	355	649	no	1	36	522	MKGYLKSHLLKKESRAWNSLLTRLPDTPLPRMNGVCICSCKMKQLIGIMCQAKCANKGQRQIPPHLLLPLTSSSPAKLHIFLHYSHLNSLLCHVSLCL
LOC100492831	XM_002934885	22948	PREDICTED: Xenopus (Silurana) tropicalis forkhead box protein O1-like (LOC100492831), mRNA	2	1024	1180	no	1	684	2160	MTGWSNRSPTSKTRATVTALLAGRILSVTICHCTASLLKFTMKPLGKVRGGC
nlgn3	NM_001171827	22954	Xenopus (Silurana) tropicalis neuroligin 3 (nlgn3), mRNA	2	1108	1327	no	1	0	2409	MWWMQKMVFPEVILITQFPTLWTICTDTQKAKIHFVRLSSLCTLTGLTETTQRPAVRLWLLCSLITSGSNHQL
gjb1	NM_001001240	22984	Xenopus (Silurana) tropicalis gap junction protein, beta 1, 32kDa (gjb1), mRNA	3	35	254	no	1	117	909	MPSDYPVPAFHSYYIFCGTQLSSTAKHNELGRIICHPEWRKPPLYFNWTHMALSGLHLSHHGPRGGCRKCMGG
LOC100495745	XM_002934904	23006	PREDICTED: Xenopus (Silurana) tropicalis zinc finger MYM-type protein 3-like (LOC100495745), mRNA	3	1952	2573	no	2	175	4168	MITSGCMGWCLSVNTASKRNSSMKRSDFLVWRKTSAVKAVCCFTNKTSQRTWGCAVSPALTVLRLASGQLLRSWMAAPGTSAVKIARASTFCGTLRLQGAMPASVKANWWKQFTGVGKLNISVISNVCYASTINKTSLTLTHRKGPRACSIVKRVKMQDPNLQQMPSQKQKPMRLPQNLGRRKFLPHLHPNLHLAHLARTKLLCANP
nono	NM_205829	23015	Xenopus (Silurana) tropicalis non-POU domain containing, octamer-binding (nono), mRNA	2	847	994	no	1	63	1458	MLCAGKPLLKWRNNSKSKLIGTLRKHKRRWRLKWKQQDTSTKLCLCVKI
taf1	XM_002934908	23042	PREDICTED: Xenopus (Silurana) tropicalis transcription initiation factor TFIID subunit 1-like (LOC100496377), mRNA	2	3421	3562	no	1	0	5493	MKTGKNMCAVKPCASHLLSMPIAVFAPPKMTSLYGNLHFLMSNIVKR
tarsl2	NM_001102753	23120	Xenopus (Silurana) tropicalis threonyl-tRNA synthetase-like 2 (tarsl2), mRNA	2	742	937	no	1	99	2541	MSYGTWIVRWSKIPMWNCSNLIVKKHKLFTGIQVLTSLERQWRIFTEAACVMAHPLKMDSIMTCT
tjp1	XM_002934912	23124	PREDICTED: Xenopus (Silurana) tropicalis tight junction protein ZO-1-like (LOC100498413), mRNA	1	2655	3066	no	3	23	5453	MMTLICMTTVFPTYQHQVVNIQCIALIVGTHQTMKTQTQKEGLTLTRTWMRHLMMRLGLHQNLQSHDLLNQSEKTHQGCKKTQHTQHIHLSQSLEQILLGIKMYLLNRKQKPYLQPLTFLCRLKQTIQLQLLLLIPW
fam189a1	NM_001078904	23135	Xenopus (Silurana) tropicalis family with sequence similarity 189, member A1 (fam189a1), mRNA	3	578	821	no	1	444	2544	MSHRGCQFCSACPHHLCQGQALMSLLGRLLGAFVRIDRCCCMETAPLSRNNLLYASLCCVCNVELGGFHSLLPKCSTCQFP
LOC100485224	XM_002934915	23153	PREDICTED: Xenopus (Silurana) tropicalis coiled-coil domain-containing protein MTMR15-like (LOC100485224), mRNA	3	2078	2285	no	2	40	2635	MEKAPHSSHFMVCFCGTSSSWKEFQMFSEIPTRPSLWICTRIAFMRTEEKLLSAGSSCSRNAPQRPCPS
trpm1	XM_002934916	23165	PREDICTED: Xenopus (Silurana) tropicalis transient receptor potential cation channel, subfamily M, member 1 (trpm1), mRNA	2	238	517	no	1	0	5088	MYLPTAKTATGVAVASYLLNTSQFLKMLRVTRMEKSASSWKQCLKNGQSVNTLSLALQMLLEFWSSRGAGTPTRPCIFACPMIQSLTLCFTSW
LOC100491720	XM_002934932	23233	PREDICTED: Xenopus (Silurana) tropicalis collagenase 3-like (LOC100491720), mRNA	2	382	673	no	1	0	669	MDQLVFWPMPSIQGRTLVEMSILMRMKLGLWIQECITCLPLLYMSLAMPWDWIIPVIQMLSCSRSTPTSIPKTSLYLPMTRGQSKSFTVNAARTSSX
dcun1d5	NM_001016303	23235	Xenopus (Silurana) tropicalis DCN1, defective in cullin neddylation 1, domain containing 5 (dcun1d5), mRNA	2	676	1054	no	1	69	765	MQILAITMKTVHGLFSSMNLLSGKKSVSHYSKIFYGEIATMSSRSLKKEKFLKNALPSLPKARLLCFSSSLPFSFIFKELMFFLLHAISPVTDIGLNDGVTLWIKTDAVYTQFERIQRNGLELWLI
dync2h1	XM_002934933	23241	PREDICTED: Xenopus (Silurana) tropicalis dynein, cytoplasmic 2, heavy chain 1 (dync2h1), mRNA	3	11090	11243	no	2	40	12292	MQCAKKEEITYHRDGQNFMNFPWQTFVQLMTLLTGFLKAKETLNGILCMAS
LOC100492060	XM_002934934	23249	PREDICTED: Xenopus (Silurana) tropicalis platelet-derived growth factor D-like (LOC100492060), mRNA	2	838	1036	no	1	0	1557	MTTLWLSLASRYVTRLWRKTSQPKRKRASVHVPVPRKRMIFCRQPRRQTGNLSPAPFPNCPITHRQ
gria4	NM_001102971	23252	Xenopus (Silurana) tropicalis glutamate receptor, ionotrophic, AMPA 4 (gria4), mRNA	1	888	1020	no	3	428	1727	MSFCMIQTGDIQYFKQLWKKRDKTDGKLVRYVWKILMMPATDAC
gucy1a2	NM_001126907	23271	Xenopus (Silurana) tropicalis guanylate cyclase 1, soluble, alpha 2 (gucy1a2), mRNA	1	465	609	no	3	185	2321	MNTMSLVAGMLRGTCTMLQSDALMQKTLGRKMLRISQEFFSVRLTCSV
cwf19l2	NM_001045656	23283	Xenopus (Silurana) tropicalis CWF19-like 2, cell cycle control (cwf19l2), mRNA	3	1964	2255	no	2	97	2863	MMMITKAFKIWSREKRWGHQRTKINSFSAWPPSLWRKRTETTTPWMICLSPKLQRKSIQIKRKKEKECKQCTSIAVSLPQWKNAGFASIMLNFPSIL
elmod1	NM_001078847	23293	Xenopus (Silurana) tropicalis ELMO/CED-12 domain containing 1 (elmod1), mRNA	2	625	778	no	1	126	1128	MTQKQISEEWAFSDCTIWYILPRKIQPQLFKSSPTPFNPNPGMPIRRNSAR
cul5	NM_001079368	23301	Xenopus (Silurana) tropicalis cullin 5 (cul5), mRNA	2	574	715	no	1	24	2364	MLIYVLIRKTNSRSTGIISKKPTWIQQSVSTAHRPLPICSRMGYRTI
cdh13	NM_001103078	23360	Xenopus (Silurana) tropicalis cadherin 13, H-cadherin (heart) (cdh13), mRNA	1	852	990	no	3	41	2180	MLMIQQQIMPCCAITFLDRLQISHHQTCSTLIQRRATLSPLFPQHY
LOC100496378	XM_002934946	23386	PREDICTED: Xenopus (Silurana) tropicalis TLD domain-containing protein KIAA1609 homolog (LOC100496378), mRNA	2	1324	1462	no	1	252	1629	MDWVWEDSMNILVFGSIVTLARDTAKQNQGAQHTTVPSCQPKRNSL
usp10	NM_001006760	23404	Xenopus (Silurana) tropicalis ubiquitin specific peptidase 10 (usp10), mRNA	1	1815	1935	yes	2	58	2473	MGTSGTSTQVFSYTSSRLCSDSYHRYIWRTYEICCVPAEL
capza2	NM_001017254	23442	Xenopus (Silurana) tropicalis capping protein (actin filament) muscle Z-line, alpha 2 (capza2), mRNA	2	67	193	no	1	0	858	MLHQESLMKCLMMYGCFLTMITYSGKVLLMHLLSTTWISSLQ
cttnbp2	XM_002934968	23458	PREDICTED: Xenopus (Silurana) tropicalis cortactin binding protein 2 (cttnbp2), mRNA	1	246	468	yes	3	32	4817	MGDLILVIPSWLYKETLKQAWLLKKRSQSVAIHSLFWRLLCLTAGKCKKECRHNWLQQREGKRSWSRKILVYKT
LOC100486527	XM_002934959	23479	PREDICTED: Xenopus (Silurana) tropicalis potassium voltage-gated channel subfamily D member 2-like, transcript variant 1 (LOC100486527), mRNA	2	1357	1525	no	1	0	1881	MRHCRVPVKRNSRLLANLALHLQPSITTCYTVWKKPRTMSLWMSKLLKTTVWRFLQ
LOC100486527	XM_002934960	23483	PREDICTED: Xenopus (Silurana) tropicalis potassium voltage-gated channel subfamily D member 2-like, transcript variant 2 (LOC100486527), mRNA	2	1357	1528	no	1	0	1884	MRHCSKVPVKRNSRLLANLALHLQPSITTCYTVWKKPRTMSLWMSKLLKTTVWRFLQ
ing3	NM_001008672	23487	Xenopus (Silurana) tropicalis inhibitor of growth family, member 3 (ing3), mRNA	1	213	348	no	3	68	1319	MLRKINRNGGKNKWLLSKRITSKLWKMQMRKFNLQIKFMTWWIDI
LOC100487097	XM_002934964	23509	PREDICTED: Xenopus (Silurana) tropicalis calcium-dependent secretion activator 2-like, transcript variant 2 (LOC100487097), mRNA	1	3150	3399	no	3	428	4175	MTRFYAMENFISMFKNALCHLSFVILISWSPPLPSQFTKGLNKKHGNQSTMALQPLKICSGNLMPYRCLYKISTGQKLNLQTT
LOC100487097	XM_002934963	23514	PREDICTED: Xenopus (Silurana) tropicalis calcium-dependent secretion activator 2-like, transcript variant 1 (LOC100487097), mRNA	1	3129	3378	no	3	428	4169	MTRFYAMENFISMFKNALCHLSFVILISWSPPLPSQFTKGLNKKHGNQSTMALQPLKICSGNLMPYRCLYKISTGQKLNLQTT
LOC100487097	XM_002934965	23521	PREDICTED: Xenopus (Silurana) tropicalis calcium-dependent secretion activator 2-like, transcript variant 3 (LOC100487097), mRNA	1	3078	3327	no	3	428	4103	MTRFYAMENFISMFKNALCHLSFVILISWSPPLPSQFTKGLNKKHGNQSTMALQPLKICSGNLMPYRCLYKISTGQKLNLQTT
frmd3	NM_001079042	23548	Xenopus (Silurana) tropicalis FERM domain containing 3 (frmd3), mRNA	1	675	855	no	3	311	2066	MVGYFAVLLMLLFWVPVLCKLRLEITILMSILTITSATSRYSLNSHRSWREKSWKFIRTS
ntrk2	NM_001079185	23562	Xenopus (Silurana) tropicalis neurotrophic tyrosine kinase, receptor, type 2 (ntrk2), mRNA	3	2483	2669	no	2	388	2851	MCTVPITTGLVGTQCCQSAGCPLRVSCTGNSQQKAMFGVWELYYGRFSLMENSLGISFQTMR
agtpbp1	NM_001113836	23569	Xenopus (Silurana) tropicalis ATP/GTP binding protein 1 (agtpbp1), mRNA	1	3102	3234	yes	3	68	3746	MAILARKMCLCMVAALKKRYGTLMLMLPHVIWWKIVDTGHFPRF
dapk1	NM_001123439	23599	Xenopus (Silurana) tropicalis death-associated protein kinase 1 (dapk1), mRNA	1	1605	1788	yes	3	242	4523	MDMLKLFNTCAALDHIQTSRIRRKKPLCIVLLGMVTTQWQKLCARLAAMSTFATGKGKHPF
fbp1	NM_203814	23619	Xenopus (Silurana) tropicalis fructose-1,6-bisphosphatase 1 (fbp1), mRNA	3	407	629	no	2	43	1057	MALRTLTAWLLLVQYFPSTKRLQKESQLKKMLYNQDETLLLQAMPYMAVQQCWFLPQNVVSTVSCWTQQLESSF
ptch1	XM_002934973	23631	PREDICTED: Xenopus (Silurana) tropicalis protein patched homolog 1-like (LOC100492061), mRNA	2	1768	1915	no	1	624	4932	MKTKRLQSWRPGKGPMFRLYIKVFHRTPHRKFSLLLQLHWMIFSSHSPM
ptch1	XM_002934973	23632	PREDICTED: Xenopus (Silurana) tropicalis protein patched homolog 1-like (LOC100492061), mRNA	2	3097	3265	no	1	624	4932	MCCWRVTNSFLGCGCITFEIGCKDCKIRLIVNGRLGKLHTMTTEMLLMMLCLLTSS
LOC100493448	XM_002934982	23638	PREDICTED: Xenopus (Silurana) tropicalis UDP-N-acetylglucosamine/UDP-glucose/GDP-mannose transporter-like (LOC100493448), mRNA	3	662	836	no	1	0	1065	MDKYCFYCTVHFCLYDGIYPAILNSTMQLLSLRSYNHSHWLPQERINCLCWYICWRRL
LOC100492222	XM_002934974	23648	PREDICTED: Xenopus (Silurana) tropicalis zinc finger protein 367-like, transcript variant 1 (LOC100492222), mRNA	2	451	613	no	1	0	1038	MRVSTLPAESAAISAIGFFLERSHCKRTKGLIQAKDLICVTIQTVGKPLHKVGN
fut1	NM_001004772	23669	Xenopus (Silurana) tropicalis fucosyltransferase 1 (galactoside 2-alpha-L-fucosyltransferase, H blood group) (fut1), mRNA	2	175	475	no	1	0	1065	MQVNRALQKTIVNVSRMGYGLLNLMGDWAIRWESMPPCMLWLRPMVTNLTSSPKCMITWHQYLKSPSLCYIAVSPAMFLLESTGSMTGCPKSIITLMRSS
arcn1	NM_001016978	23800	Xenopus (Silurana) tropicalis archain 1 (arcn1), mRNA	2	454	640	no	1	39	1578	MRKRCSVQSERHRKEKPRQRCDAKPRSFSRLEGMQSGRARRLLDLEGLEVRVVPPCLTMQFR
LOC100489410	XM_002935015	23814	PREDICTED: Xenopus (Silurana) tropicalis hypothetical protein LOC100489410 (LOC100489410), mRNA	3	698	989	yes	2	343	3199	MALFVCGTSVRVPMTMQSGITDMLTHMVLVLNMRWPGKKTGCCCVAGKTVIFPVKVDGSCVSICGAILRRKWFPVPTVGGCSPTTPNFMTISEGKPH
trim29	XM_002935010	23861	PREDICTED: Xenopus (Silurana) tropicalis tripartite motif-containing 29 (trim29), mRNA	2	472	739	no	1	231	1737	MMFCVIHALMTRKRLLGLVWSVRHPSVKPILSPIWRGLLFVTISYWSPLETLRPENVSSTAKQWSCSVKLTKVAYATFVCSRSIRIITQ
cpsf3	NM_001006769	23914	Xenopus (Silurana) tropicalis cleavage and polyadenylation specific factor 3, 73kDa (cpsf3), mRNA	1	453	591	no	3	143	2219	MLLRLYTDGCCQIMSKSVISQQMICCTQRQTWRKVWTKLKPSTSMK
mboat2	NM_001102685	23923	Xenopus (Silurana) tropicalis membrane bound O-acyltransferase domain containing 2 (mboat2), mRNA	1	546	690	no	2	331	1888	MVCLTFYCAKRNCILHNDRRKTGKHAQILLCVCIGIPHFVPNCKSLYF
kidins220	NM_001126687	23937	Xenopus (Silurana) tropicalis kinase D-interacting substrate, 220kDa (kidins220), mRNA	1	4425	4581	no	3	116	5339	MLLTIRHQLFPLLMLLRLILLLKKMKNQISRDLSFCLPRSQLKDLASSRQQI
rnf144a	NM_001101808	23951	Xenopus (Silurana) tropicalis ring finger protein 144A (rnf144a), mRNA	3	296	671	no	2	97	973	MLVVQREVTYRKMRSNAWLQQKLCKSIKSCSLKKKSSWIHAERGVPRHPVRLFVNSKRKAFRIHNLYSAQPATLSSVRPARPTGTRGKDAQKTWQLRFFQEIQALSLKALKMTCRSNAAQSVKSI
pde12	XM_002935037	24017	PREDICTED: Xenopus (Silurana) tropicalis phosphodiesterase 12 (pde12), mRNA	2	295	556	no	1	0	1653	MGRPGGRGRCCRWGRPSTWWSGTPRPSCTWSCPGWCWLGPRCAPGSAWSSGGPTCPGSSGSDRGSGAGRGPVPAGCTPRGRRSWDSG
LOC100497265	XM_002935038	24023	PREDICTED: Xenopus (Silurana) tropicalis protein FAM116A-like (LOC100497265), mRNA	1	771	900	no	3	83	1796	MKLIFSGVFRQFSSIFRWFGSWCFWESPLWLWLHHHPSHRRPF
slmap	NM_001113814	24034	Xenopus (Silurana) tropicalis sarcolemma associated protein (slmap), mRNA	3	953	1139	no	2	562	3028	MGSRRGDDQMSSQLRYPVPLTRLLLTLPVCTLRNFSSFPSIYRRPYIGNRCWNRSWPLFRDY
slmap	NM_001113814	24035	Xenopus (Silurana) tropicalis sarcolemma associated protein (slmap), mRNA	3	623	800	no	2	562	3028	MSTWTSQSRLAALWLAVAQHRTMQPLTARCCQETTHLSGLTTRLASSTFKTLRVVTVPS
flnb	XM_002935047	24044	PREDICTED: Xenopus (Silurana) tropicalis filamin-B-like (LOC100485165), mRNA	2	388	625	no	1	0	7785	MKVMRKPRTRRQSRDFWAGSRTKSLSCQSPISARTGRMERHWELWWIAVPQDYVPIGNLGTLRSRWRMPGRLCSKLMIG
rpp14	NM_001017048	24063	Xenopus (Silurana) tropicalis ribonuclease P 14kDa subunit (rpp14), mRNA	3	518	1019	no	2	97	484	MPLIPVVWKAAIYVPTRSPHITRWFHVTSQRQYSVKVGDYAVLSRTFTQNDIRVFSELTGDTNPLHSDEAFAKGTRFGKTVVHGVLINGLVSAVLGTKLPGPGCVLLSQDIRFPAPLHIGEEVTATAQVMALKRSLAIVAVSCLARESGRTVMEGTVKVLVSEKKSC
pdhb	NM_001016212	24068	Xenopus (Silurana) tropicalis pyruvate dehydrogenase (lipoamide) beta (pdhb), nuclear gene encoding mitochondrial protein, mRNA	2	142	301	no	1	12	1092	MKKSRGMKGCSCSGRRWPSMMEPIRSVGGSGKSMGTRELWILPYLRWALLESL
celf4	NM_001078910	24083	Xenopus (Silurana) tropicalis CUGBP, Elav-like family member 4 (celf4), mRNA	3	911	1115	no	2	76	1348	MALLASQPRLTVSLPQKLYLLMESTLTQHRVPPQQTPCSKPTPEYSSMQLPTLLLMVRSVKPFHSRLP
cdh8	XM_002935052	24090	PREDICTED: Xenopus (Silurana) tropicalis cadherin-8-like (LOC100486228), mRNA	2	481	796	no	1	0	2397	MTMHQSFLMDHITPLFQRCPLWVPMSQSLQQQMQMILFMETVPSWYTAFWKASLIFLLSLTQPLLRLHFLIWIEKPEKNILWSFKLRTWVDTWAGCLELQQSRLH
cdh8	XM_002935052	24091	PREDICTED: Xenopus (Silurana) tropicalis cadherin-8-like (LOC100486228), mRNA	2	2188	2452	no	1	0	2397	MRLIMIPQLLLMTPFRFMDMKEEDQWQVHLALWSLQHQTQIKILTTLLIGVLVLRDLENYTQLEKVTKKLDNKPTFCSPDRLINAVIF
cdh8	XM_002935052	24092	PREDICTED: Xenopus (Silurana) tropicalis cadherin-8-like (LOC100486228), mRNA	2	1462	1663	no	1	0	2397	MLMTMRLNLQQTMKLFFVKMGNQGRSFRLLVPLIKMIQGMGTFSFIVFYQTWLTIQTLQSRIIKIIL
LOC100486528	XM_002935054	24114	PREDICTED: Xenopus (Silurana) tropicalis c-type lectin domain family 3 member A homolog (LOC100486528), mRNA	3	263	404	no	2	4	583	MKLMRTALPKEEHWQFPEMLKRTMLSGTMERRVFVVLESFGWVLTTW
ephb1	XM_002935075	24141	PREDICTED: Xenopus (Silurana) tropicalis EPH receptor B1 (ephb1), mRNA	2	2437	2566	no	1	0	2886	MPLSKIIAFLHPWTVQLPFISLCWTAGRKIATAVRALGRLSTP
cobra1	NM_001011448	24263	Xenopus (Silurana) tropicalis cofactor of BRCA1 (cobra1), mRNA	2	1267	1393	no	1	42	1770	MSLQSFCRRTESRVRWGCITRCTSPSKGTRTSCSVCSLRSKR
cobra1	NM_001011448	24265	Xenopus (Silurana) tropicalis cofactor of BRCA1 (cobra1), mRNA	2	778	910	no	1	42	1770	MTWISARSVPWILVISSPGAWMPVSVRSLWTPSERGSCRAFWMG
glul	NM_203966	24273	Xenopus (Silurana) tropicalis glutamate-ammonia ligase (glul), mRNA	1	504	792	no	3	65	1178	MVGQRTASLGHKVPITAAWGRIRCTGGTSWRRTTRRVYTPASRSVAPTRKSCPPSGSSRWDRAKASTWGTTYGWPGSSSTGCARTSGWWPRWTPSP
nr4a1	NM_001078835	24312	Xenopus (Silurana) tropicalis nuclear receptor subfamily 4, group A, member 1 (nr4a1), mRNA	2	1324	1450	no	1	183	1914	MCSSSTTFSLVHWKSFASGLRKFRDLWSSPKKIKTYCLNPPF
c12orf44	NM_001016820	24325	Xenopus (Silurana) tropicalis chromosome 12 open reading frame 44 (c12orf44), mRNA	2	370	571	no	1	180	834	MSGYHQRSWTEHYTKLLVNSRMLCGIQEVMGLGKFPWNSIKRRNHDGHSQMSAFHGKSGPSKLMLFH
c12orf44	NM_001016820	24326	Xenopus (Silurana) tropicalis chromosome 12 open reading frame 44 (c12orf44), mRNA	2	664	802	no	1	180	834	MNTCQRCQHSLRWIMCLIQVLKMCSPICTKSLIRLLTHWAHLSPLQ
adcy6	XM_002935120	24354	PREDICTED: Xenopus (Silurana) tropicalis adenylate cyclase type 6-like (LOC100493933), mRNA	2	2722	3010	no	1	0	3495	MPSKWSPRRDLTSCGSCRPQERRKKWNNCKPITDVSCTTSSQKMWPLTFWPENTGMTSCITSPVNVWRSCLPPSVTSLSFMWSWRRTTRGLNACDC
cacnb3	NM_001126672	24366	Xenopus (Silurana) tropicalis calcium channel, voltage-dependent, beta 3 subunit (cacnb3), mRNA	2	307	430	no	1	111	1563	MSVTVERWMRSAQFKELPLTLKPKISYISRRNTTMTGGSGG
cacnb3	NM_001126672	24367	Xenopus (Silurana) tropicalis calcium channel, voltage-dependent, beta 3 subunit (cacnb3), mRNA	2	1114	1309	no	1	111	1563	MRTSWKMPVSTLLSIWRFTGEPHTTRCTPKTVRTLSHPQLPFLVYRTSSFSLIEPMSTHPWSVTV
ddx23	NM_001017213	24374	Xenopus (Silurana) tropicalis DEAD (Asp-Glu-Ala-Asp) box polypeptide 23 (ddx23), mRNA	1	27	168	no	3	17	419	MLVLCMVAKAKNRESLRCLTLRLEPRIYWLQLTLLGVVLIFRMCLWL
rnd1	NM_001008072	24378	Xenopus (Silurana) tropicalis Rho family GTPase 1 (rnd1), mRNA	1	153	402	no	3	92	788	MFTVGRRQCCKCWQRIVTQRPMYLQYLKITQPVWRQKNSVWSSACGTLQVLPIMIMCGLCATVTLMQCCSVLMSVGQKVWIVL
dhh	NM_001097169	24443	Xenopus (Silurana) tropicalis desert hedgehog (dhh), mRNA	3	974	1136	yes	2	583	1771	MDTMLMTLCIMKGAHWTLQHLTETGANMACWHAWQWKLALTGCIMNPKHTSMSL
lmbr1l	XM_002935107	24451	PREDICTED: Xenopus (Silurana) tropicalis limb region 1 homolog-like (lmbr1l), mRNA	2	331	562	no	1	198	1647	MLTLPQLTLKMLPSTELRSGCAPSHWQCPWVQYCCFPSPSSVMRCYSRCPTIITSSGSMAPWSMDSGTWSSFSPTCH
tuba4a	NM_001114233	24455	Xenopus (Silurana) tropicalis tubulin, alpha 4a (tuba4a), mRNA	3	128	350	no	2	76	1429	MPAGNCIVWNMASNLMGRCPVTRPLEEGTTPSTPFSVKLEQESMSPELCLLTWNPLSLMRCAQEHTVSCSTQSS
tuba1b	XM_002935108	24457	PREDICTED: Xenopus (Silurana) tropicalis tubulin, alpha 1b, transcript variant 1 (tuba1b), mRNA	2	334	565	no	1	108	1461	MRCALAHTANSSTQSNLSLERKMLPITMPVVTTQLARRSLTWCWTGSANWLTSAQVSRVSWSSTALVVVLVLDSPPC
tuba1b	XM_002935108	24459	PREDICTED: Xenopus (Silurana) tropicalis tubulin, alpha 1b, transcript variant 1 (tuba1b), mRNA	2	160	310	no	1	108	1461	MPAGNCIVWNMASNLMGRCPVTRPLEEGTTPSTPFSVKLEQESMSPGLSL
tuba1b	XM_002935109	24461	PREDICTED: Xenopus (Silurana) tropicalis tubulin, alpha 1b, transcript variant 2 (tuba1b), mRNA	3	269	500	no	2	148	1396	MRCALAHTANSSTQSNLSLERKMLPITMPVVTTQLARRSLTWCWTGSANWLTSAQVSRVSWSSTALVVVLVLDSPPC
tuba1b	XM_002935109	24463	PREDICTED: Xenopus (Silurana) tropicalis tubulin, alpha 1b, transcript variant 2 (tuba1b), mRNA	3	95	245	no	2	148	1396	MPAGNCIVWNMASNLMGRCPVTRPLEEGTTPSTPFSVKLEQESMSPGLSL
tuba1c	NM_203747	24467	Xenopus (Silurana) tropicalis tubulin, alpha 1c (tuba1c), mRNA	3	125	275	no	2	73	1420	MPAGNCIVWNMASNLMGRCPVTRPLEEETTPSTPFSVKLEQESMSPGLSL
tuba1c	NM_203747	24468	Xenopus (Silurana) tropicalis tubulin, alpha 1c (tuba1c), mRNA	3	1268	1496	no	2	73	1420	MPSVPSCTGMWVRVWRRVSSLRPVKTWLPWRKIMKRLVQIVQMQKMKAKSIKLYSVFLKLCLSIPEFPLLKSNFFF
tuba1c	NM_203747	24469	Xenopus (Silurana) tropicalis tubulin, alpha 1c (tuba1c), mRNA	3	1058	1205	no	2	73	1420	MQLLPPSRQSVPSSLWIGAQLVSKLVSTISPQLWFQGETWPRCSVLCVC
adamts16	XM_002935133	24509	PREDICTED: Xenopus (Silurana) tropicalis A disintegrin and metalloproteinase with thrombospondin motifs 16-like (LOC100498052), mRNA	2	2011	2173	no	1	0	3333	MCVLMGFVRQLDVTTFLALMQFKISAVFAKGIILHVRFTGVTTQNNTTLTSITQ
adamts16	XM_002935133	24511	PREDICTED: Xenopus (Silurana) tropicalis A disintegrin and metalloproteinase with thrombospondin motifs 16-like (LOC100498052), mRNA	2	1360	1606	no	1	0	3333	MILSLEKNINILKSYQECYMMLTYSANGSLEKRPSSACWILKRISVRRFGATELEGNVRQSLCQQLKAPYVGTICGAEEASV
LOC100485011	XM_002935135	24519	PREDICTED: Xenopus (Silurana) tropicalis polypeptide N-acetylgalactosaminyltransferase 12-like (LOC100485011), mRNA	2	931	1090	no	1	0	1596	MTLEWKYGVEKTLNFLLGSGNVAGALKFTHVLMWAMFSPDKLHTPVVRPCPTV
galnt4	NM_001079237	24523	Xenopus (Silurana) tropicalis UDP-N-acetyl-alpha-D-galactosamine:polypeptide N-acetylgalactosaminyltransferase 4 (GalNAc-T4) (galnt4), mRNA	1	1263	1470	no	3	176	1922	MLDTYSPRKLLMQGQIFCRTRPGLQKSGWMDIKNFFTTETHLHVRKIMVIFQRENYLERDYNARVLTGT
LOC100489676	XM_002935151	24538	PREDICTED: Xenopus (Silurana) tropicalis leucine-rich repeat and calponin homology domain-containing protein 3-like (LOC100489676), partial mRNA	2	850	988	no	1	0	1623	MALALATMTATMDDGMVLWTLALTVWIVATRGGLAMSRLMNCQTEL
dvl3	NM_001123457	24566	Xenopus (Silurana) tropicalis dishevelled, dsh homolog 3 (dvl3), mRNA	2	1873	2182	yes	1	201	2340	MEVAALAVSTVKVVGVVAPTEAVQRNEKNERQKVGIPSLEEVEASQIIPRVAVCVESELPVSVQFQQVNTATEVTIPSHTVSGVITHTIPSVHQESHLSMAPQ
dvl3	NM_001123457	24567	Xenopus (Silurana) tropicalis dishevelled, dsh homolog 3 (dvl3), mRNA	2	385	670	no	1	201	2340	MTMQSCHASMEELCAGLYPQMVHSLMPGLCVLITSQIYRHQLSGLVELGIPDPPHFIQTPEAARRTWTMKLRLILWYRHIERDQEERRHLNMPPG
ap2m1	NM_203644	24573	Xenopus (Silurana) tropicalis adaptor protein complex AP-2, mu1 (ap2m1), mRNA	1	777	909	no	3	86	1391	MRLAKRESNQLPLMTVHSTSVSGLANLTLSAASALYLQMENLSL
alg3	NM_001113083	24590	Xenopus (Silurana) tropicalis asparagine-linked glycosylation 3, alpha-1,3- mannosyltransferase homolog (alg3), mRNA	2	649	841	no	1	15	1353	MCCCWLLDCFIFCSAGLAYCTPSPNFAFVQYFRCYWASHSYWKIPLVTLSAPLILEGNFSFSGQ
eif4g3	XM_002935144	24616	PREDICTED: Xenopus (Silurana) tropicalis eukaryotic translation initiation factor 4 gamma, 3 (eif4g3), mRNA	2	2965	3130	no	1	165	4992	MMRNLWSASADCCPPLARTWILRELSHVWTSTSTRWIKSLRSGRHLHELDSCCRM
LOC100488889	XM_002935146	24624	PREDICTED: Xenopus (Silurana) tropicalis chloride channel protein 2-like (LOC100488889), mRNA	2	487	775	no	1	0	2463	MRMSRVILRCLLQPVLWVLGAASLLLLEECCLVLKSPPHSLLSEITGVGSLLPPSVHLFFVFLQCGSKMKKPSQHYSKPVFVSTFHLIFRSSQHLL
LOC100488889	XM_002935146	24626	PREDICTED: Xenopus (Silurana) tropicalis chloride channel protein 2-like (LOC100488889), mRNA	3	206	458	yes	1	0	2463	MGHISCSLNYFLCWIHTDPRPPSSWFRYTRDEDYSAWRCAKGVSHTENLHCKSYWVNMCTWEWFAAGQRRPICSCCKYVCCSAK
LOC100489199	XM_002935148	24646	PREDICTED: Xenopus (Silurana) tropicalis ephrin type-B receptor 3-like (LOC100489199), mRNA	3	938	1217	yes	2	232	3154	MEMENGWCLWVPVHAHLGLKQLGRTLNAKHANVEHTSQSREREAVCLAPLTAEPFLQQPLSVPVRMDTTVLTERVLRLRVPLCPRHHDMLSPM
arhgef10	XM_002935157	24660	PREDICTED: Xenopus (Silurana) tropicalis rho guanine nucleotide exchange factor 10-like (LOC100490713), mRNA	3	2468	2660	no	2	58	4144	MKSELQTAAEFSSNSLANRTSLDAPLTLLQYLTHSLLLPNSHGSVTYRWLSLLLERRTTQDGSV
arhgef10	XM_002935157	24661	PREDICTED: Xenopus (Silurana) tropicalis rho guanine nucleotide exchange factor 10-like (LOC100490713), mRNA	3	830	956	no	2	58	4144	MMWKMVKMVETAHWTMAGALVNLKAMKNTVTRSQNMGYQTHF
myom2	XM_002935159	24674	PREDICTED: Xenopus (Silurana) tropicalis myomesin (M-protein) 2, 165kDa (myom2), mRNA	2	3373	3586	no	1	0	3984	MNLLGYRFVSLQKKTKENTHLRYLMLRHLISGQWICLDKHLMKPLQNSKDLRQQPLLRRIVVKSWEDCLMW
myom2	XM_002935159	24677	PREDICTED: Xenopus (Silurana) tropicalis myomesin (M-protein) 2, 165kDa (myom2), mRNA	2	2848	2980	no	1	0	3984	MRSKHCWPKLNSRGKNILENKVLIFLNIYTGKFQRNVKYYWCAR
pfkp	NM_203886	24681	Xenopus (Silurana) tropicalis phosphofructokinase, platelet (pfkp), mRNA	2	2083	2272	no	1	141	2547	MRTAMRTTRQISFISFTRRKAEACLTAERMYWATCSRVALLPRSTETSALKFPPKPFSGFPRS
LOC100492608	XM_002935163	24716	PREDICTED: Xenopus (Silurana) tropicalis cullin-2-like, transcript variant 1 (LOC100492608), mRNA	2	85	223	no	1	0	2298	MLKEQRGTTDSQIFTHCVLPIQSLLEKDCIQKQRYFWKTMYSNCTR
LOC100492608	XM_002935164	24722	PREDICTED: Xenopus (Silurana) tropicalis cullin-2-like, transcript variant 2 (LOC100492608), mRNA	2	85	223	no	1	0	2235	MLKEQRGTTDSQIFTHCVLPIQSLLEKDCIQKQRYFWKTMYSNCTR
pard3	XM_002935165	24727	PREDICTED: Xenopus (Silurana) tropicalis par-3 partitioning defective 3 homolog, transcript variant 1 (pard3), mRNA	2	2272	2548	no	1	0	4062	MTELLCCLPSSLTTHLPAHMMMLVVLQTLLVLGLKQWLVSQQKALSVQIWIHHLPFRGKGLAAKACQKSAQSSLEMPVNWILLRPGNQKAWI
pard3	XM_002935165	24730	PREDICTED: Xenopus (Silurana) tropicalis par-3 partitioning defective 3 homolog, transcript variant 1 (pard3), mRNA	2	3445	3829	no	1	0	4062	MIGYSASGRNSSRPGRKTTWTNAGEPIALSNRGQTLRRIIRAGGIRFLWKFRCNGSDKRNERASSKHSASTAHCPGKVEKILVRSPKIPGNRRILLEKGSRVQRRTPDIQVTKDQEMVTWADMVSMPG
pard3	XM_002935165	24731	PREDICTED: Xenopus (Silurana) tropicalis par-3 partitioning defective 3 homolog, transcript variant 1 (pard3), mRNA	2	157	577	yes	1	0	4062	MAMGAFWTLMIFYVMWLMTKTGLWRSMMSKTHIMGEMAPALVLLALRAQKYLGVSLEPIACLPSSPTKQQARLRSPLLSCEQTCHFMYGEAAIQPLSALPLLSVIPISRQRSRLVKTLHVGLPQRASPRRILQRAWVPVK
pard3	XM_002935166	24733	PREDICTED: Xenopus (Silurana) tropicalis par-3 partitioning defective 3 homolog, transcript variant 2 (pard3), mRNA	2	3406	3790	no	1	0	4023	MIGYSASGRNSSRPGRKTTWTNAGEPIALSNRGQTLRRIIRAGGIRFLWKFRCNGSDKRNERASSKHSASTAHCPGKVEKILVRSPKIPGNRRILLEKGSRVQRRTPDIQVTKDQEMVTWADMVSMPG
pard3	XM_002935166	24734	PREDICTED: Xenopus (Silurana) tropicalis par-3 partitioning defective 3 homolog, transcript variant 2 (pard3), mRNA	2	2233	2509	no	1	0	4023	MTELLCCLPSSLTTHLPAHMMMLVVLQTLLVLGLKQWLVSQQKALSVQIWIHHLPFRGKGLAAKACQKSAQSSLEMPVNWILLRPGNQKAWI
pard3	XM_002935166	24737	PREDICTED: Xenopus (Silurana) tropicalis par-3 partitioning defective 3 homolog, transcript variant 2 (pard3), mRNA	2	157	577	yes	1	0	4023	MAMGAFWTLMIFYVMWLMTKTGLWRSMMSKTHIMGEMAPALVLLALRAQKYLGVSLEPIACLPSSPTKQQARLRSPLLSCEQTCHFMYGEAAIQPLSALPLLSVIPISRQRSRLVKTLHVGLPQRASPRRILQRAWVPVK
pard3	XM_002935167	24741	PREDICTED: Xenopus (Silurana) tropicalis par-3 partitioning defective 3 homolog, transcript variant 3 (pard3), mRNA	2	3319	3703	no	1	0	3936	MIGYSASGRNSSRPGRKTTWTNAGEPIALSNRGQTLRRIIRAGGIRFLWKFRCNGSDKRNERASSKHSASTAHCPGKVEKILVRSPKIPGNRRILLEKGSRVQRRTPDIQVTKDQEMVTWADMVSMPG
pard3	XM_002935167	24743	PREDICTED: Xenopus (Silurana) tropicalis par-3 partitioning defective 3 homolog, transcript variant 3 (pard3), mRNA	2	157	577	yes	1	0	3936	MAMGAFWTLMIFYVMWLMTKTGLWRSMMSKTHIMGEMAPALVLLALRAQKYLGVSLEPIACLPSSPTKQQARLRSPLLSCEQTCHFMYGEAAIQPLSALPLLSVIPISRQRSRLVKTLHVGLPQRASPRRILQRAWVPVK
pard3	XM_002935169	24748	PREDICTED: Xenopus (Silurana) tropicalis par-3 partitioning defective 3 homolog, transcript variant 5 (pard3), mRNA	2	157	577	yes	1	0	3819	MAMGAFWTLMIFYVMWLMTKTGLWRSMMSKTHIMGEMAPALVLLALRAQKYLGVSLEPIACLPSSPTKQQARLRSPLLSCEQTCHFMYGEAAIQPLSALPLLSVIPISRQRSRLVKTLHVGLPQRASPRRILQRAWVPVK
pard3	XM_002935169	24749	PREDICTED: Xenopus (Silurana) tropicalis par-3 partitioning defective 3 homolog, transcript variant 5 (pard3), mRNA	2	3202	3586	no	1	0	3819	MIGYSASGRNSSRPGRKTTWTNAGEPIALSNRGQTLRRIIRAGGIRFLWKFRCNGSDKRNERASSKHSASTAHCPGKVEKILVRSPKIPGNRRILLEKGSRVQRRTPDIQVTKDQEMVTWADMVSMPG
pard3	XM_002935170	24752	PREDICTED: Xenopus (Silurana) tropicalis par-3 partitioning defective 3 homolog, transcript variant 6 (pard3), mRNA	2	3115	3499	no	1	0	3732	MIGYSASGRNSSRPGRKTTWTNAGEPIALSNRGQTLRRIIRAGGIRFLWKFRCNGSDKRNERASSKHSASTAHCPGKVEKILVRSPKIPGNRRILLEKGSRVQRRTPDIQVTKDQEMVTWADMVSMPG
pard3	XM_002935170	24754	PREDICTED: Xenopus (Silurana) tropicalis par-3 partitioning defective 3 homolog, transcript variant 6 (pard3), mRNA	2	157	577	yes	1	0	3732	MAMGAFWTLMIFYVMWLMTKTGLWRSMMSKTHIMGEMAPALVLLALRAQKYLGVSLEPIACLPSSPTKQQARLRSPLLSCEQTCHFMYGEAAIQPLSALPLLSVIPISRQRSRLVKTLHVGLPQRASPRRILQRAWVPVK
pard3	XM_002935170	24755	PREDICTED: Xenopus (Silurana) tropicalis par-3 partitioning defective 3 homolog, transcript variant 6 (pard3), mRNA	2	2101	2377	no	1	0	3732	MTELLCCLPSSLTTHLPAHMMMLVVLQTLLVLGLKQWLVSQQKALSVQIWIHHLPFRGKGLAAKACQKSAQSSLEMPVNWILLRPGNQKAWI
pard3	XM_002935168	24759	PREDICTED: Xenopus (Silurana) tropicalis par-3 partitioning defective 3 homolog, transcript variant 4 (pard3), mRNA	2	3187	3571	no	1	0	3804	MIGYSASGRNSSRPGRKTTWTNAGEPIALSNRGQTLRRIIRAGGIRFLWKFRCNGSDKRNERASSKHSASTAHCPGKVEKILVRSPKIPGNRRILLEKGSRVQRRTPDIQVTKDQEMVTWADMVSMPG
pard3	XM_002935168	24760	PREDICTED: Xenopus (Silurana) tropicalis par-3 partitioning defective 3 homolog, transcript variant 4 (pard3), mRNA	2	157	577	yes	1	0	3804	MAMGAFWTLMIFYVMWLMTKTGLWRSMMSKTHIMGEMAPALVLLALRAQKYLGVSLEPIACLPSSPTKQQARLRSPLLSCEQTCHFMYGEAAIQPLSALPLLSVIPISRQRSRLVKTLHVGLPQRASPRRILQRAWVPVK
larp4b	NM_001130268	24772	Xenopus (Silurana) tropicalis La ribonucleoprotein domain family, member 4B (larp4b), mRNA	2	715	853	no	1	354	2532	MNLCTKPPIQGQMISHSQKVKKTSVICLRKHWNFAYLERIWPVTCT
dip2c	NM_001079142	24782	Xenopus (Silurana) tropicalis DIP2 disco-interacting protein 2 homolog C (dip2c), mRNA	3	482	704	no	2	391	4900	MNDTGQMYIQKQCRQPWLNIKKGRWPYPCHPSGAPWWYKPQWMPIHPQIPLQAQKMKALYKGTPKVLPRQVRVV
zmynd11	NM_001103001	24788	Xenopus (Silurana) tropicalis zinc finger, MYND domain containing 11 (zmynd11), mRNA	2	760	967	no	1	105	1917	MHSYFYTTQLFFMETTVSRPMWLRFFTRTLVMSWMSCSFAKIASICQMLGLKIGSAIPVYLIMNWSGPK
eif1ax	NM_001004814	24834	Xenopus (Silurana) tropicalis eukaryotic translation initiation factor 1A, X-linked (eif1ax), mRNA	1	555	759	no	3	239	671	MESFQNMLKLMKQTHLVLVMMMKFSLMTLEMTMKILMISNVRRLFHSKFQGLFDKVLFGILSAALLKR
pdha1	NM_001017072	24864	Xenopus (Silurana) tropicalis pyruvate dehydrogenase (lipoamide) alpha 1 (pdha1), nuclear gene encoding mitochondrial protein, transcript variant 2, mRNA	2	517	892	no	1	36	1221	MLRTSMEEMELWELRFPLEQALLWPASFLEKMRSVWRYMVMVLLTRDRYLKPIIWLLYGSCPVSLFVRITDMAWGPLWREQQPAQTITNEETTSQALELMAWMFYVLEKPHSLQPITADLERAQF
sat1	NM_001007996	24872	Xenopus (Silurana) tropicalis spermidine/spermine N1-acetyltransferase 1 (sat1), mRNA	3	293	449	yes	2	163	676	MDLENIHFTTVLLLKCLRRPRVLMDTPLLGLQCTTSPMTRGLENCFILKTSL
acot9	NM_001127117	24881	Xenopus (Silurana) tropicalis acyl-CoA thioesterase 9 (acot9), nuclear gene encoding mitochondrial protein, mRNA	3	1019	1199	no	2	16	1270	MLLLLMISCSRDLWKLDHCCSFLHRFVTQRASTFRSECTVKFLTPSPENTIPLTYFISHF
mtmr4	XM_002935193	24928	PREDICTED: Xenopus (Silurana) tropicalis myotubularin related protein 4 (mtmr4), mRNA	3	1052	1280	no	2	121	2884	MPDLTQLLWQTEQKEEDVNVKNIIQTVKWRSWEWLISIQFGTAFSILELCVTRCPIQETGSQHWKVQSGYSTCLPC
cldn3	NM_001005709	24943	Xenopus (Silurana) tropicalis claudin 3 (cldn3), mRNA	3	497	662	yes	1	351	990	MDELCGAEHRANAVQNVRLPLSSSSRPPSSSRPDGDLHCHCCAGSSHIHHWCQVH
rsrc2	NM_001011036	24957	Xenopus (Silurana) tropicalis arginine/serine-rich coiled-coil 2 (rsrc2), mRNA	2	1186	1447	no	1	135	1362	MRKKLPLVQLMLKVSRHSSSKRRCSETWMRSMKWQDHKLILREEWAWVLLHQCEEWIPFEEKKWNFKVFTSLDLSIFHVLVTKKLEF
rsrc2	NM_001011036	24958	Xenopus (Silurana) tropicalis arginine/serine-rich coiled-coil 2 (rsrc2), mRNA	2	445	673	yes	1	135	1362	MEKKDTDEKKKDHLEAEVIPSLAHVKDGIVVEAMTEESPVPEVRRGKGALVHALGQDLNIDIEARVEAEVERRKKE
pitpnm2	NM_001142189	24988	Xenopus (Silurana) tropicalis phosphatidylinositol transfer protein, membrane-associated 2 (pitpnm2), mRNA	3	371	548	no	2	223	4231	MVLGAPANTLIRCTTSACIYPAGSVLSCLKLLCGLKKSPGMHILTPEPDILAPLWRSFL
rilpl1	NM_001102850	25017	Xenopus (Silurana) tropicalis Rab interacting lysosomal protein-like 1 (rilpl1), mRNA	3	1292	1412	no	2	202	1384	MSTFRNPLDNGQSITGMMFIQNKDKKHYSTCDIFCFALYA
dnah10	XM_002935198	25043	PREDICTED: Xenopus (Silurana) tropicalis dynein heavy chain 10, axonemal-like (LOC100492440), mRNA	2	12361	12544	no	1	0	13287	MLKLVTTHKQHEICGPISWNCSPKQVNPAPASAETSTLARWQRTLKTNCLKYLTLIKSERT
LOC100495638	XM_002935208	25079	PREDICTED: Xenopus (Silurana) tropicalis myosin-4-like (LOC100495638), mRNA	1	2250	2391	no	3	65	5879	MPVQSQMGSLLTARKLLRSSWAQLMLITLSINLDTPRCSSKLVFWVP
LOC100495638	XM_002935208	25082	PREDICTED: Xenopus (Silurana) tropicalis myosin-4-like (LOC100495638), mRNA	1	3360	3561	no	3	65	5879	MNNLWVLSYRKRSRNFRLVLKNLRRKLRLNVQLVQRLRNRGLIFPGNLRRSVKGLKKPEVQHLHRLK
LOC100495638	XM_002935208	25083	PREDICTED: Xenopus (Silurana) tropicalis myosin-4-like (LOC100495638), mRNA	1	4053	4230	no	3	65	5879	MPLLMLCNPPAMTLTCSVSNMRRNRKPRPNSNALYLKPMVKFLSGGPNMKLTPFSALRN
LOC100495638	XM_002935208	25084	PREDICTED: Xenopus (Silurana) tropicalis myosin-4-like (LOC100495638), mRNA	1	1296	1875	no	3	65	5879	MNLSPRARLSDRSIMLLVPSANLCMRNCSCGWSHVSTNSWIPNNQDNSSLVSWILLDLKFLISTAWSSSASTSLMKNCSSSSTTTCSSWNRKNTKRKALTGSLLTLVWIWLPALSLLKSPWVSSPSLKRSACSPRLLTPPSRTSSMNNIWANARTLKSPSLAKERLKLTSLWGIMLVLWITTSPAGLIRTRIH
LOC100495802	XM_002935209	25092	PREDICTED: Xenopus (Silurana) tropicalis myosin-4-like (LOC100495802), mRNA	2	3292	3493	no	1	0	5811	MNKLWVLSYRKKSRSFRLALKNLRRKLRLNVQLVQRLRNRGLIFPGNLRRSVKGLKKPEVQHLHRLK
LOC100495802	XM_002935209	25094	PREDICTED: Xenopus (Silurana) tropicalis myosin-4-like (LOC100495802), mRNA	2	4297	4417	no	1	0	5811	MLREQTVQLQLLIRSRGTLIRFCQNGSRSTRRDKLNWRQL
LOC100495802	XM_002935209	25095	PREDICTED: Xenopus (Silurana) tropicalis myosin-4-like (LOC100495802), mRNA	2	1228	1807	no	1	0	5811	MNLSPRARLSDRSIMLLVPSANLCMRNCSCGWSHVSTNSWIPNNQDNSSLVSWILLDLKFLISTAWSSSASTSLMKNCSSSSTTTCSFWNRKNTKRKALTGSLLTLVWIWLPALSLLKSPWVSSPSLKRSACSPRLLTPPSRTSSMNNIWANARTLKSPSLAKERLKLTSLWGIMLVLWITTSPAGLIRTRIH
LOC100495802	XM_002935209	25096	PREDICTED: Xenopus (Silurana) tropicalis myosin-4-like (LOC100495802), mRNA	2	2182	2323	no	1	0	5811	MPVQSQMGSLLTAKKLLRSSWAQLTLIILSINLDTPRCSLKLVFWVP
LOC100495802	XM_002935209	25097	PREDICTED: Xenopus (Silurana) tropicalis myosin-4-like (LOC100495802), mRNA	2	3985	4225	no	1	0	5811	MPLLMLCNLPAMTLTCSVSNMRRNRKPRLNSSAHCPKPMVRLPSGGLNMKLTPFSVLRSWKKQRRSLLSVYKKLRNKLRL
myh8	XM_002935203	25101	PREDICTED: Xenopus (Silurana) tropicalis myosin, heavy chain 8, skeletal muscle, perinatal (myh8), mRNA	2	3922	4162	no	1	0	5745	MPLLMVCNLLAMIVTCSVSNLRRNRKPRLNSSVHCPKPMVKLPSGGPSMKLMPFSVLKSWKKPRRSLPSVYRMLRNKLRL
myh8	XM_002935203	25102	PREDICTED: Xenopus (Silurana) tropicalis myosin, heavy chain 8, skeletal muscle, perinatal (myh8), mRNA	2	1168	1747	no	1	0	5745	MNLSPRVKPSHRSIILLAPSASLYLKNCSCGWSYVSTNSWIPNNQDSSLLVSWILLGLKSLISTAWSSSASTSLMKNCSSSSTTTCSSWNRKNTKRKALTGSSLTLVWIWLPALSLLKSPWVSSPSLKRSACSPRLLTPPSRTSSMNNIWANARTLKSPSLAKERLKLTSLWCIMLVLWITTSLAGLIRTRTH
myh8	XM_002935203	25104	PREDICTED: Xenopus (Silurana) tropicalis myosin, heavy chain 8, skeletal muscle, perinatal (myh8), mRNA	2	3229	3430	no	1	0	5745	MNNLWVFSCKRRSKNCRLVLKNLRKKLRLNVQLVQRLRNRGLIFPENLRRSVKDLKKLEVQHLPKLR
myh8	XM_002935203	25105	PREDICTED: Xenopus (Silurana) tropicalis myosin, heavy chain 8, skeletal muscle, perinatal (myh8), mRNA	2	4234	4354	no	1	0	5745	MWKEQIVLQHLLIRSRGTLIRSSQNGSRSTRKDKLNWRQP
myh8	XM_002935203	25106	PREDICTED: Xenopus (Silurana) tropicalis myosin, heavy chain 8, skeletal muscle, perinatal (myh8), mRNA	2	2119	2269	no	1	0	5745	MPVQSQMDSSLTARKLVRSFWAQSMLITHSTNLGTPRCSSKLDFWVLWKK
myh8	XM_002935203	25107	PREDICTED: Xenopus (Silurana) tropicalis myosin, heavy chain 8, skeletal muscle, perinatal (myh8), mRNA	3	2300	2450	no	1	0	5745	MHTGSLQRFLDEGGVQENDGKKRGHICHPVQSQIIYECQTLAMDEIVLQD
LOC100495968	XM_002935210	25113	PREDICTED: Xenopus (Silurana) tropicalis myosin-4-like (LOC100495968), mRNA	1	1449	2028	no	3	218	6044	MNLLPRVKLSHRSATQLVPSASLFMRSCSCGWSHVSTNSWTPSNQGSFLLVSWILLDLKSLTLTAWSSFALISPMKNCSSSSITTCSSRNKKNTKRKALNGSSLTLVWIWLPALSLLRSPWVFSQFLKRSACSLRLLKPPSRTSSMSNIWASARILKSPSLVKERLKLTSLWCIMLVLWITTSPAGLIRTRIH
LOC100495968	XM_002935210	25115	PREDICTED: Xenopus (Silurana) tropicalis myosin-4-like (LOC100495968), mRNA	1	2412	2562	no	3	218	6044	MLVQFQMVNLLTAKRLLRSFLDQLMLITISIDLDTQRCSSKLVFWVLWKK
LOC100495968	XM_002935210	25116	PREDICTED: Xenopus (Silurana) tropicalis myosin-4-like (LOC100495968), mRNA	1	4215	4455	no	3	218	6044	MPLLMLFNLPAMIVTCSVSNSRRNRKQSLSSSAHCPKPIMKFHSGETNMKLMPFNVLRSWKRPKRNLPNIYRKLRTKLQL
LOC100495014	XM_002935204	25151	PREDICTED: Xenopus (Silurana) tropicalis pappalysin-1-like (LOC100495014), mRNA	2	1669	1897	no	1	0	4881	MRLVTVWDSTMSSVASQRSSPVVTLAWRQILPLKQGISVVIPTQLPSTRCVEILVLLQEMTLVDSRNLLTLPSTIT
LOC100495014	XM_002935204	25152	PREDICTED: Xenopus (Silurana) tropicalis pappalysin-1-like (LOC100495014), mRNA	2	3979	4144	yes	1	0	4881	MGCGLFLNPSVSLCAWHHHHCQMLSCRLPDVLMMAIRLDPFVNIGASRDSMSMTH
LOC100495014	XM_002935204	25153	PREDICTED: Xenopus (Silurana) tropicalis pappalysin-1-like (LOC100495014), mRNA	2	2155	2389	no	1	0	4881	MLLMHLLQYPATHLAIGAQGKPKVILMLNNHVKQVYAPGAQILEEIITMCHQLVLNHMDVTCSWNLVMQWYLSHLQYG
astn2	XM_002935205	25155	PREDICTED: Xenopus (Silurana) tropicalis astrotactin-2-like (LOC100495162), mRNA	2	520	892	no	1	0	3546	MLNGGGTSGGGFHRKVPAPKQLMRSTTYHLYFWDPLHVNFVDPGCSPTTQFWECLSGKPPFWMTMIVKKRILYVVQREEPKLLNTKTTSVRKERMRRMKQKKELLLVSGDQKKTLVQKRGMKPS
astn2	XM_002935205	25157	PREDICTED: Xenopus (Silurana) tropicalis astrotactin-2-like (LOC100495162), mRNA	2	2212	2434	no	1	0	3546	MSCISMVPTISQRLYMVQSLHAQSDFPAKRCSSSCGFSTRKKLQSWAAKKNSSPCLSSHTCLGYSLHKCCPMTT
astn2	XM_002935205	25161	PREDICTED: Xenopus (Silurana) tropicalis astrotactin-2-like (LOC100495162), mRNA	3	2273	2426	no	1	0	3546	MHNPISQQKGAAAVVASVPERNYRAGQQKRTQVHAFHHIPVWATHCTNAVR
LOC100495314	XM_002935206	25165	PREDICTED: Xenopus (Silurana) tropicalis deleted in bladder cancer protein 1 homolog (LOC100495314), mRNA	2	1609	1834	no	1	0	2205	MSIRLVEAIQKGGVCLLVSMAIQSGRKQGFRTASALTGLCYWETAGRHSLKLCIFTFAVAPAFQLFSAMTLAKAQ
LOC100495314	XM_002935206	25167	PREDICTED: Xenopus (Silurana) tropicalis deleted in bladder cancer protein 1 homolog (LOC100495314), mRNA	2	85	301	no	1	0	2205	MSPKSLIGSSQTEAHSITHAATCPLWRGIDRATLPDIKSTGFGMWWREWTDYLKKLGKTWWSWYLLVPMNKC
phf19	NM_001078978	25185	Xenopus (Silurana) tropicalis PHD finger protein 19 (phf19), mRNA	2	1195	1333	no	1	51	1455	MNVRGSGSKEFGGNSRSSFWRMQFPVVTLRRPGAQTITWPAYLTSP
brd3	XM_002935214	25201	PREDICTED: Xenopus (Silurana) tropicalis bromodomain containing 3 (brd3), mRNA	1	1494	1659	no	3	359	2747	MLPTPGPSTNRWMQKPWNCMTTMISSSTQWTSVRLKEKWTPGNMQMHRLLQLISA
col5a1	XM_002935229	25212	PREDICTED: Xenopus (Silurana) tropicalis collagen, type V, alpha 1 (col5a1), mRNA	2	2185	2725	yes	1	264	2829	MVLGECLDKQDQRVTEALTGWAVCQEKRDIVVSLVHKVHQGHMEKTEKGVMMETLDLEGYQVNLDPEGCLDLKDLLAHRESPVFLEWTVKLDPKVVWDLKVSQDHLGSKETQEHRVFQVLRELLDHQERRDHWENQVFPECPELMDLPVTPGKKDPQERKEPWYGICFLCIVFCLSLFIG
LOC100488195	XM_002935230	25217	PREDICTED: Xenopus (Silurana) tropicalis collagen alpha-1(V) chain-like (LOC100488195), mRNA	2	1561	1984	no	1	0	3201	MMVQKVALAQLDFLVILVLLENLVLQVKMVHLVIRERTVNLDSQGHQVLLESLGLQDHLERGVLLVQQVLKDVKEKKEQRVNQVWKDLLVRLVLLVPKDLPENLDLKAFEEFQALLVNKVSLVHLDLMALPDLWVHQVYQV
LOC100488195	XM_002935230	25220	PREDICTED: Xenopus (Silurana) tropicalis collagen alpha-1(V) chain-like (LOC100488195), mRNA	2	2524	2755	no	1	0	3201	MGNIGLTQIKDALETRSRFSVISQPVENLVSSPTRSLKELELHLGPRKIQAPGSVNSSVVNCCPTLIQMATPLEWCR
LOC100488195	XM_002935230	25221	PREDICTED: Xenopus (Silurana) tropicalis collagen alpha-1(V) chain-like (LOC100488195), mRNA	2	385	733	yes	1	0	3201	MAQQVHLVKGDHLDLKDPLDLQDRRAPLVHQGKMDFPATLDREERLDSKERLALLVPLALSVLRVQLERLAQWVKEDILVLQVLLVSKVYLVWLEKKDPRETPVLLVCLEKMDLQV
LOC100488195	XM_002935230	25222	PREDICTED: Xenopus (Silurana) tropicalis collagen alpha-1(V) chain-like (LOC100488195), mRNA	2	1033	1411	yes	1	0	3201	MVIRVKSESLGKKETEEIKESRVPQVHLAHKVPLVSLAHQDLMESQAPGVNKVFLDKKVMKDLEVLLDHQDLLDCRVYLDHLVRREKPETLVRWVLLVPLVLEVLLAPLELMAHKVLLEELATLVL
olfm1	NM_001100244	25226	Xenopus (Silurana) tropicalis olfactomedin 1 (olfm1), mRNA	2	1543	1783	no	1	306	1761	MSPMVIQVAPKCTMLTKPTHPTMNTLTFPSTTSTHTSPCWTTTPRTGPCTLGTMDTKFSTTSPSSTSFAPTNCSRAIYDL
fam69b	NM_001097225	25247	Xenopus (Silurana) tropicalis family with sequence similarity 69, member B (fam69b), mRNA	1	1062	1311	no	3	344	1637	MALRSPGSSRLCCRPPCTDSSTSGAPPPGRGGPRSPSACWSSWRRYSTEPTGASSSATPASRTSATTRSTTSRWWTCGRWPPK
notch1	NM_001097288	25259	Xenopus (Silurana) tropicalis notch 1 (notch1), mRNA	1	6351	6579	no	3	233	7799	MLRPCSSRVVLIRICRTTRKRHLCSWPREKAATRLPKSFWTTTPTATSRTTWTVCPATSPRNACTTTSSTCWMNTT
notch1	NM_001097288	25261	Xenopus (Silurana) tropicalis notch 1 (notch1), mRNA	1	2184	2379	yes	3	233	7799	MESASTRSTATSAPVSPATQARCAILTLMNVPATRAATEGHAKTRSTASRVCAQMATTTTCACLK
notch1	NM_001097288	25262	Xenopus (Silurana) tropicalis notch 1 (notch1), mRNA	1	1317	1482	no	3	233	7799	MAGQVSFATWIMPVSATPATRAPTVTPTQSTGRPSVPAHRGTPARLATMTWMSAL
notch1	NM_001097288	25263	Xenopus (Silurana) tropicalis notch 1 (notch1), mRNA	1	5727	5880	no	3	233	7799	MTKLTTDSGRSSTSTPPTCAFHPWPPHRRRERLMLTAWTSMFVALMVSPRL
notch1	NM_001097288	25265	Xenopus (Silurana) tropicalis notch 1 (notch1), mRNA	1	1503	1701	yes	3	233	7799	MAEDVPTPWALSSATALRGTPDPAARSTSMNVSPTRAKMTPRAWTRSESSSVYACQVTKGFTVRPT
notch1	NM_001097288	25266	Xenopus (Silurana) tropicalis notch 1 (notch1), mRNA	1	3324	4032	no	3	233	7799	MGAPVRTAMGRISAPVPKGTQDSTARTWCAGATPLPVRTEESAGRPTISTGVSARAAGPAFTAMSPVSPARWLLSSKAWISPTCAAIRECAWTQGTPTSAAARPATRAVTARNRWTNARPIPARTAPRAQITWAATRASVWPATTGLTARRKSTSVCPTHATMAGPVLISLTPTNVPAPEELKVCTVKSTWTTAPPSTTPSAWNPSASTTANVSTAWAATTASAPRASWANAAKAT
notch1	NM_001097288	25268	Xenopus (Silurana) tropicalis notch 1 (notch1), mRNA	1	2382	2517	no	3	233	7799	MSATATRVSMGRAMMGSMGTNATVMQGGAVAIVTSTTTNVNPTRV
notch1	NM_001097288	25269	Xenopus (Silurana) tropicalis notch 1 (notch1), mRNA	1	4560	4947	no	3	233	7799	MRKSARMSSAPSWPTTRSATPTATTTPAGGTAATALSTSTTPGRTAPSRCSAGNTSTTANATRSATTPAACTTASTARKWRFSATLCTTSIAGITFKTAIATKAVTTQSANGTAWTVTTCRRTWPKAPC
sec16a	XM_002935232	25285	PREDICTED: Xenopus (Silurana) tropicalis SEC16 homolog A (sec16a), mRNA	3	5294	5681	yes	1	0	7173	MGRLAPSPGHGAVQPDQQRRRSHQGHDGNGRYISISGTVGRLARLLFDGTSRLWHFYQEIHQVGPHWIQPQFIICQVLHKRSHPENRGLRVRAVARHPVLLPPQYTGLQVHLRLPVGGTRIIRAGLPLL
pmpca	XM_002935218	25295	PREDICTED: Xenopus (Silurana) tropicalis peptidase (mitochondrial processing) alpha (pmpca), mRNA	3	269	596	yes	2	70	1624	MGYGWRRRTNSGSSAQLGFLSTPDRGTRLNTSAESHTFWKNWLFHPQRSSAAKMRSSSRWRNTEAFVTARPLETPPCTPCLRTPRAWIQSSVCCLRWFCNPGSPRKRLR
card9	NM_001126802	25314	Xenopus (Silurana) tropicalis caspase recruitment domain family, member 9 (card9), mRNA	3	173	323	no	2	46	1612	MKSRSSMTRIWSSAKGKWVCCWIFYRGLGAKVTWPFWKALSFITRTCTRR
ccdc3	NM_001017103	25352	Xenopus (Silurana) tropicalis coiled-coil domain containing 3 (ccdc3), mRNA	1	660	837	no	3	278	1061	MRYLQIHWRTEECFPAFSSFPTVLMGRMLQCFPVTGKFKKTLGCCALLCKVPYLRKRTG
kiaa1324l	XM_002935245	25392	PREDICTED: Xenopus (Silurana) tropicalis KIAA1324-like (kiaa1324l), mRNA	2	1258	1393	yes	1	144	3129	MGHQLVLHAPLEPILMDQVNVRHVLQEQSLFLDLHISGGTSFQAT
LOC100492610	XM_002935246	25398	PREDICTED: Xenopus (Silurana) tropicalis metabotropic glutamate receptor 3-like (LOC100492610), mRNA	1	2046	2286	no	2	133	2767	MHPSTFGTWNIFCCLLFCSTDQDKSHCQDIQRCKGWCPKTKIHQSQIPSCHMSQSYLSSDCCCICMAHVGIPWHKTLYTS
sema3d	XM_002935247	25410	PREDICTED: Xenopus (Silurana) tropicalis semaphorin-3D-like (LOC100492784), mRNA	2	1462	1606	no	1	357	2685	MAHMHTRKVQTTDGYSTMEESPILDLEHVQAKLMTLPSDLQKISLTML
sema3d	XM_002935247	25412	PREDICTED: Xenopus (Silurana) tropicalis semaphorin-3D-like (LOC100492784), mRNA	2	1051	1198	no	1	357	2685	MIIIGLMEQSFLVHTQYQIHITQMMTRYTFSFENHLQKAAFQKNLYFLV
LOC100494110	XM_002935255	25419	PREDICTED: Xenopus (Silurana) tropicalis semaphorin-3A-like (LOC100494110), mRNA	2	2776	2962	no	1	636	2934	MNSVSKCGKGTANNVGKKMEMSRLATPNGSTYRKTKRVEIGGPMNLRGHQGVSDLHYLFKPE
sema3e	XM_002935256	25423	PREDICTED: Xenopus (Silurana) tropicalis semaphorin-3E-like (LOC100494277), mRNA	3	1073	1310	no	2	145	2479	MNLKMYSCCIPGITKTQRYLHYSVLPVTFSKDMPFVFIIWLVSERHSMVHLHTKKDLSTTGQYMKEKYLTQGLDCVPAK
sema3e	XM_002935256	25424	PREDICTED: Xenopus (Silurana) tropicalis semaphorin-3E-like (LOC100494277), mRNA	3	1718	1898	no	2	145	2479	MGLHVRTAVWLEIHIVLGMGYLVLDTIHWDHTPKDGLEDKMFVMETQFSSALDNSFMEKH
LOC100494439	XM_002935257	25428	PREDICTED: Xenopus (Silurana) tropicalis protein piccolo-like (LOC100494439), mRNA	2	3967	4117	no	1	0	14778	MIHWMIAVKVKIHPFHREKEELAMSHQAAMNTNKKTVKDLGMMKILSVNK
LOC100494439	XM_002935257	25438	PREDICTED: Xenopus (Silurana) tropicalis protein piccolo-like (LOC100494439), mRNA	2	8035	8179	no	1	0	14778	MLCTDYLLEEAAFQSSLQHVYLKIDLVTEMTIISMIAQVIHLLEEGEV
LOC100494439	XM_002935257	25439	PREDICTED: Xenopus (Silurana) tropicalis protein piccolo-like (LOC100494439), mRNA	2	12436	12604	no	1	0	14778	MTFSMPCQTVKHTICVVKKQIGLTSHENHVWKMGMELTEGYQINYPIQEHHISRSM
gnpda1	XM_002935258	25444	PREDICTED: Xenopus (Silurana) tropicalis glucosamine-6-phosphate deaminase 1 (gnpda1), mRNA	2	289	505	no	1	75	942	MSMWAFPGSTLRAIIPSCGTTSLSTSTSALRMPTSWMEMPQTFRQSVTCLKKRFGLLVGLSCLLEVLVLMAT
hspa4	NM_203921	25447	Xenopus (Silurana) tropicalis heat shock 70kDa protein 4 (hspa4), mRNA	2	2503	2647	no	1	117	2622	MSRMDQLMVVQTAKGHRLLSRIQIQLLQRQRRSFLKWTLNKFHLLFLF
hspa4	NM_203921	25451	Xenopus (Silurana) tropicalis heat shock 70kDa protein 4 (hspa4), mRNA	2	1576	1822	no	1	117	2622	MEYLVYPVPLLLKSTKQKMVRNPWKQTRLQRRRRKCKLIKKKLNQKRTSKQKARRTLMRWRPHNLGPRIKRPISLPKPRKQK
aff4	XM_002935271	25464	PREDICTED: Xenopus (Silurana) tropicalis AF4/FMR2 family member 4-like (LOC100485382), mRNA	2	1162	1414	yes	1	0	3297	MEIRSVIKQCQQIHQEVLNPRRTTVKVQRTPGMTQAAIVALKVAQDQTLRVRAVLAIVKQMNHHVVPPLSLNHLHQISGSWITG
aff4	XM_002935271	25466	PREDICTED: Xenopus (Silurana) tropicalis AF4/FMR2 family member 4-like (LOC100485382), mRNA	2	1939	2137	no	1	0	3297	MKMRAYRLHPKPPNILKAIGLPLQNPPLRRRIVFSVSVCSLLWKRRNLFHPSVSQRKGTHSLLRLT
arhgap26	NM_001126773	25500	Xenopus (Silurana) tropicalis Rho GTPase activating protein 26 (arhgap26), mRNA	3	773	962	no	2	217	2494	MRSRRGKCLSLLNHCLPSCKASSPSITMAMNWPKTSVTLKRSFPSAFRIHGTVLKAHALRWSH
yipf5	NM_001007976	25509	Xenopus (Silurana) tropicalis Yip1 domain family, member 5 (yipf5), mRNA	2	550	946	no	3	77	845	MSGNVLSSEFNEHDGRFVWLCIQCTWLLSSSHDYTLQFCCNLLFTRNFGHCSCCLDNWLVQFLRLKDLHFCSGHGWTTGSSCLPLCFTLWSVCSYLCVLSIFYFNLDFSGPTANKDQSCLPERTRELCYLTF
kctd16	XM_002935264	25512	PREDICTED: Xenopus (Silurana) tropicalis BTB/POZ domain-containing protein KCTD16-like (LOC100497743), mRNA	2	790	1000	no	1	0	1284	MTRSGPVTPNMFSTEGLPNGNHQTTVTAAVRTPKGTKKEKVEHRAMNSPLQVAIANRKPAPLKRQSSVGQ
LOC100486126	XM_002935275	25515	PREDICTED: Xenopus (Silurana) tropicalis ATP synthase subunit alpha, mitochondrial-like (LOC100486126), mRNA	2	1312	1444	no	1	0	1857	MMTCPSRLLPTVRCLCCCVVLPVVRPTPGMSSTCTPVFWKERLX
gabbr2	NM_001016007	25545	Xenopus (Silurana) tropicalis gamma-aminobutyric acid (GABA) B receptor, 2 (gabbr2), mRNA	2	1147	1291	no	1	306	3192	MNTWQQKSSVVLLMKTCMAVNTNGLSQDGIKRYGGSKLTLQHVPLRTY
gabbr2	NM_001016007	25546	Xenopus (Silurana) tropicalis gamma-aminobutyric acid (GABA) B receptor, 2 (gabbr2), mRNA	2	1381	1576	no	1	306	3192	MKKNTMKNGQVLSQANFMVMPMMEYGLLPKHCIEPWNIFIPPNNVKGSRTSIILTTSWEKYFWML
LOC100487349	XM_002935278	25563	PREDICTED: Xenopus (Silurana) tropicalis zinc transporter ZIP6-like, transcript variant 1 (LOC100487349), mRNA	3	2237	2396	no	2	481	2461	MQKMCQCGYLHLLLVYLCMLLLLIWFLKCYIMMQATMAVAAGDTSCYKMLEFC
LOC100487349	XM_002935279	25567	PREDICTED: Xenopus (Silurana) tropicalis zinc transporter ZIP6-like, transcript variant 2 (LOC100487349), mRNA	3	2216	2375	no	2	481	2440	MQKMCQCGYLHLLLVYLCMLLLLIWFLKCYIMMQATMAVAAGDTSCYKMLEFC
LOC100487611	XM_002935280	25573	PREDICTED: Xenopus (Silurana) tropicalis muscle-related coiled-coil protein-like (LOC100487611), mRNA	1	3192	3795	yes	1	0	1074	MGTDHYKIALFADDVLLTLTNPQISLPSLHKLLETYSTLSGYKINVTKTEALPLHIPPLTLEALKSTFKYNWKKEYISYLGTRITPRYETLYSQNFLPLLHEVKSKLQKWAEYPISWFGKIASIKMSILPKFLYLFETLPVCVPPTTFKATQAMLHNFIWGKKRHRINKRTLTSPTKLGGLGVPDLQQYYRAAHIRQILAX
LOC100487611	XM_002935280	25579	PREDICTED: Xenopus (Silurana) tropicalis muscle-related coiled-coil protein-like (LOC100487611), mRNA	3	2705	3209	no	1	0	1074	MCANYRPIALLNTDLKLFSKILANRLAPILTKMINADQVGFILGRQAGDNTRRTINLIDILNRQKKQALILSLDAQKAFDRLDWSYLFALLQHLNLRGPYLQALCSIQHPNYHSQIARPFQHPHTYIQRHETRVPTLAPSLCPQHRTPSSQYPQPPRYQRGRNGHRPL
ncor2	XM_002935285	25612	PREDICTED: Xenopus (Silurana) tropicalis nuclear receptor co-repressor 2 (ncor2), mRNA	3	2171	2327	no	2	394	7651	MKAHGGRKRKWKPLRKVSLNMDVTGLPLPGWWAPRPCPSARTSTSITRRGRT
LOC100490194	XM_002935286	25622	PREDICTED: Xenopus (Silurana) tropicalis probable ATP-dependent RNA helicase DHX37-like (LOC100490194), mRNA	2	1039	1216	no	1	0	2799	MKEQRKMRKQTHLSHSSCCLSTPCWPLRNRPRSFAPLHLVQGYVLWPPMWLKPPLPSLV
epc2	NM_001005683	25665	Xenopus (Silurana) tropicalis enhancer of polycomb homolog 2 (epc2), mRNA	1	1341	1485	no	3	236	2648	MTSKAPMMTNSHRYPLHCQSLRKRMTPMDLMLSEGELDASIMHLVWTK
epc2	NM_001005683	25666	Xenopus (Silurana) tropicalis enhancer of polycomb homolog 2 (epc2), mRNA	1	321	618	no	3	236	2648	MTASLSTGPCRRCRRGWKRRRNRNITYSEQSQHNKFSERRKRAWSFRFLRPRAMFTTTVVCTKGNLNSPSSSFTSSLLIWTMSSQIMIWTLKTRRCLTD
prkrip1	NM_001017225	25682	Xenopus (Silurana) tropicalis PRKR interacting protein 1 (IL11 inducible) (prkrip1), mRNA	3	227	356	yes	1	69	588	MVSEICSRICQRCHGIKCWGWQWRVPCISTSSAQRVPKARVPG
nlk	NM_001123413	25686	Xenopus (Silurana) tropicalis nemo-like kinase (nlk), mRNA	2	1423	1594	no	1	144	1746	MPWLTHTWMKAACDITLACANVVFQLLLGGSTPVISSLSQIQNLMTLLKRTSVLFGR
LOC100494226	XM_002935293	25695	PREDICTED: Xenopus (Silurana) tropicalis small G protein signaling modulator 2-like (LOC100494226), mRNA	2	2905	3091	no	1	6	3150	MKMYLQYGRSFGLLDSYPQSILCSSLLWLWWRSIGRLYVTIIWTSQISSSFLMKWRNITMHN
pafah1b1	NM_205830	25711	Xenopus (Silurana) tropicalis platelet-activating factor acetylhydrolase 1b, regulatory subunit 1 (45kDa) (pafah1b1), mRNA	3	773	983	no	2	469	1699	MHSVVIGVPSLVSFFIQCLVLWSQHQKMQQLRCGTMRLEILNAHSRGTQTLCRIYLLTILESYWPLVLQI
cluh	NM_001079109	25718	Xenopus (Silurana) tropicalis KIAA0664 (kiaa0664), mRNA	1	1788	2040	no	3	185	4073	MTKMRKWSFAPLWSVRVSLEMTGVITFWICCAPSPLTLISYQLKVRLCQRNVQKWDFLKSTGTSYVVYVRSWWMLLWSTGISYS
LOC100495015	XM_002935298	25728	PREDICTED: Xenopus (Silurana) tropicalis rap1 GTPase-activating protein 2-like (LOC100495015), mRNA	2	1468	1651	no	1	693	3021	MMNMKLTTLSSLGLYTRNISRHQRKNYLATVKKVLPSKSSWIYLETQSYSKTSKGSVEDLM
LOC100485269	XM_002935301	25751	PREDICTED: Xenopus (Silurana) tropicalis hexokinase-2-like (LOC100485269), mRNA	2	46	181	no	1	0	2748	MTKFRRWTSTYTTCAYQMRHSWKCQADLRSRWRKDLGKRPAPPPA
tia1	NM_203945	25773	Xenopus (Silurana) tropicalis TIA1 cytotoxic granule-associated RNA binding protein (tia1), mRNA	3	1136	1283	no	2	172	1330	MCPMAGKCQHMGCMDRHGISRDIVKRHRLLPHGWDQITGCNLSLARMGL
tia1	NM_203945	25774	Xenopus (Silurana) tropicalis TIA1 cytotoxic granule-associated RNA binding protein (tia1), mRNA	3	617	770	yes	2	172	1330	MDSCPSLINGMQKMPLHRWEASGLGVDRLELTGPQENLQRQRAPMNPTQSS
arhgap25	NM_001006709	25825	Xenopus (Silurana) tropicalis Rho GTPase activating protein 25 (arhgap25), mRNA	2	976	1114	no	1	324	2274	MQERGLHLAVIQMYTQWHPYLNYTCGNCPSLLYLGDSMRIFSPVRK
cds2	NM_001126503	25829	Xenopus (Silurana) tropicalis CDP-diacylglycerol synthase (phosphatidate cytidylyltransferase) 2 (cds2), mRNA	3	191	401	no	2	127	1522	MIPRIKIRIRIKIRSRVRLNLKSKQMEKLHRTAKAKLTLAGHNKAPLQMIHQRFSIEPWPIFHLGGRTGG
vcpip1	XM_002935320	25865	PREDICTED: Xenopus (Silurana) tropicalis valosin containing protein (p97)/p47 complex interacting protein 1 (vcpip1), mRNA	1	1692	1848	no	3	110	3692	MIPPLSIWMGTELIQNPLEVNVVVASNTTGMARNTIICQKPFLLHSSGEEGL
sgk3	XM_002935321	25867	PREDICTED: Xenopus (Silurana) tropicalis serine/threonine-protein kinase Sgk3-like (LOC100491891), mRNA	1	606	822	no	3	341	1811	MNLFRIYFVIQNYAATLMSSPSFNWTLQSINQILQRMKMKELIKRMVLLHEMSTWDPLETLMPSLPILNTSN
LOC100492065	XM_002935322	25880	PREDICTED: Xenopus (Silurana) tropicalis brefeldin A-inhibited guanine nucleotide-exchange protein 1-like (LOC100492065), mRNA	2	1051	1282	yes	1	0	5370	MGIVYMPMVYLXLPYLMNCAPRYFHSSCYSPFCRTQGLFLRLMKCLSMQSSSISVLLCLKMESRLFQRSLSCLCLFF
LOC100492065	XM_002935322	25883	PREDICTED: Xenopus (Silurana) tropicalis brefeldin A-inhibited guanine nucleotide-exchange protein 1-like (LOC100492065), mRNA	3	503	647	no	1	0	5370	MLQHLSSQQKPCQSDYSQGHLNTNAQCNICTNGKPSPSGSQTHGKGAA
prex2	XM_002935314	25891	PREDICTED: Xenopus (Silurana) tropicalis phosphatidylinositol 3,4,5-trisphosphate-dependent Rac exchanger 2 protein-like (LOC100490424), mRNA	1	1215	1359	no	3	299	5108	MLTMEQLISTAAETQLSTGGRYITRPRTSGLSAWPRPLRTNKNGWRLY
prex2	XM_002935314	25893	PREDICTED: Xenopus (Silurana) tropicalis phosphatidylinositol 3,4,5-trisphosphate-dependent Rac exchanger 2 protein-like (LOC100490424), mRNA	1	924	1047	no	3	299	5108	MRPSDRWKNWKSWRNGSPTLKDGRGPASRILVQRCLCMESC
sulf1	NM_001097379	25902	Xenopus (Silurana) tropicalis sulfatase 1 (sulf1), mRNA	2	322	484	no	1	0	2652	MRTALLRPGKPSMSLAHLLYISITRATGQLFSENTSMSIMEATSLLGGGNGLDL
LOC100492380	XM_002935324	25905	PREDICTED: Xenopus (Silurana) tropicalis solute carrier organic anion transporter family member 5A1-like (LOC100492380), mRNA	3	2024	2447	no	1	0	2637	MQYTHPIPHLSLYCYPHHCLCATLSHHSDTQVSGRRRETVRIGNAVCFAPDSGLHSHSDLLWRSDRHDVHALAAGLWRAGLLLGIQRDVLSLCLLWIGSWSEILRIHFYISGLVFHKTQRGSIAEKKVEGVANKHSQRDGQ
ube2n	NM_204044	25923	Xenopus (Silurana) tropicalis ubiquitin-conjugating enzyme E2N (UBC13 homolog) (ube2n), mRNA	2	100	232	no	1	18	474	MKTMLAISMCLSLVHRIPPLREGHLNLNYFFRKNTQWQRLKYVS
aven	XM_002935329	25962	PREDICTED: Xenopus (Silurana) tropicalis apoptosis, caspase activation inhibitor (aven), mRNA	3	239	482	no	2	43	937	MNRCRWDSPGGKSVPTGIAMKKLRRSLSLKAKCFKEEPITVSSLVQQGIPSLSLDLLMRKTGKQKLQATNRPPLCVWIPSL
galntl1	NM_001045626	25995	Xenopus (Silurana) tropicalis UDP-N-acetyl-alpha-D-galactosamine:polypeptide N-acetylgalactosaminyltransferase-like 1 (galntl1), mRNA	2	1081	1234	no	1	132	1818	MTHKWTFGEERTLNCPSVCGCAVAAWKLCPAAVLVTCLGNGTRMSSLMETH
actn1	NM_001079198	26010	Xenopus (Silurana) tropicalis actinin, alpha 1 (actn1), mRNA	2	1738	1993	no	1	27	2682	MRYPRSCRRIMSICLAQTPTPALHLKKSTTNGTMSDSWSPVGIRHLQRNMPGSSRTSDCGNSLLHRPTSLDHGYKQRCRRSAALL
actn1	NM_001079198	26011	Xenopus (Silurana) tropicalis actinin, alpha 1 (actn1), mRNA	2	37	184	no	1	27	2682	MTPRITICSRKTIGTGTSCWIQPGRSSKERHLQHGATHISGKLGHRLRT
actn1	NM_001079198	26012	Xenopus (Silurana) tropicalis actinin, alpha 1 (actn1), mRNA	2	187	334	no	1	27	2682	MRISGMALNSCYYLKSFQVSVWPNLNEARCVYTKSPMSIKPWILLPVKV
baz1a	XM_002935334	26045	PREDICTED: Xenopus (Silurana) tropicalis bromodomain adjacent to zinc finger domain protein 1A-like (LOC100497377), mRNA	1	3639	4002	no	3	149	4868	MHAARCAVRKEMERAWCYVMAVTEDTISTVLGPNLNMFQKETGSVQNVIPSNVPAGCHPDRDIQWIAMRKKKKNLKIRRRKKKKKRRRSKRRVNLKMRRKKLCLKKKALQKEGDHPECNCL
baz1a	XM_002935334	26047	PREDICTED: Xenopus (Silurana) tropicalis bromodomain adjacent to zinc finger domain protein 1A-like (LOC100497377), mRNA	1	585	810	yes	3	149	4868	MEWLMAMLVMKILLLSVIVMRNHLKKCHRLGRKRSQLIPLYANIKLSQFRRSCMNLLLSKDLNSVENHRYFPKTD
LOC100485325	XM_002935344	26062	PREDICTED: Xenopus (Silurana) tropicalis hypothetical protein LOC100485325 (LOC100485325), mRNA	2	1585	1753	no	1	0	2199	MTICQPITMNWCSPNLPSGMSFGVLCWKRRTQNCMAPMRLSRVEIPQKLWRTSLVE
foxa1	NM_204088	26078	Xenopus (Silurana) tropicalis forkhead box A1 (foxa1), mRNA	1	759	1062	no	3	122	1406	MTALLRWPGPQTSQAKALTGPCTPIPGTCLRMAAIFVGKSDLSARNNKGGKAAKMAGKMFLALRPLCTGYMANPARWTAAPPCPTLPAALSPWNTMVLMGR
nkx2-1	XM_002935337	26099	PREDICTED: Xenopus (Silurana) tropicalis NK2 homeobox 1, transcript variant 1 (nkx2-1), mRNA	3	470	656	yes	1	132	1170	MVWSQPGPKILNNFPLYGSLQRNEHGRSRQYGLPGRCREEHDPPAGNPQEKAQSSLLPGSSV
brms1l	NM_001102896	26116	Xenopus (Silurana) tropicalis breast cancer metastasis-suppressor 1-like (brms1l), mRNA	3	107	311	no	2	67	1033	MIWRLTIRKMKALVPKRTIRIVPAGAKRETARRWMMKTVKDAEWNVWTKCLTLKNSLQISKINFTRRG
LOC100491218	XM_002935365	26208	PREDICTED: Xenopus (Silurana) tropicalis neurexin-2-alpha-like (LOC100491218), mRNA	2	802	985	no	1	0	4956	MQPPSEGMSSSVTTCPTAPSRAVQMKSHSPSELFNVMGLCFIQGSQQTTLIFHSRVAQCGW
LOC100491218	XM_002935365	26212	PREDICTED: Xenopus (Silurana) tropicalis neurexin-2-alpha-like (LOC100491218), mRNA	2	1702	2146	no	1	0	4956	MMENGVMWTFRGMAGKVLSQLTVETPHSRLGVKVKFLTLMGTCIWGDCLNLERTYSFPLRSGQHPLVWDLLVAFGTSLLMAKAEISDDWQSYLGLLALLLSVLGKHSDSVLLRLVEMVGNAVRVGTATSVTVWGQDTLGTAVRGKLRS
LOC100491218	XM_002935365	26215	PREDICTED: Xenopus (Silurana) tropicalis neurexin-2-alpha-like (LOC100491218), mRNA	2	3301	3505	no	1	0	4956	MGVHSAMILAPPTFLGKEEHSLPIPGPQMIDQVQELIVLQLVSPPNRRMQFYSEWIVPLVWETTYSFT
nutf2	NM_001011126	26251	Xenopus (Silurana) tropicalis nuclear transport factor 2 (nutf2), mRNA	2	154	364	no	1	51	432	MHHALHGKDNNIMVKLQLLKNSQCFLFRKFSIALPHKIINPLQTVASSVWLLVNLRLMMTQLWGFIRYFS
nrxn1	XM_002935382	26305	PREDICTED: Xenopus (Silurana) tropicalis neurexin 1 (nrxn1), mRNA	3	2048	2228	no	2	673	5134	MLPHWTPSLLKLRSLLSLCPNGMLRKQAPYHLTFARLNPMGSYFSVMESRDTKKTQRTLR
nrxn1	XM_002935382	26309	PREDICTED: Xenopus (Silurana) tropicalis neurexin 1 (nrxn1), mRNA	3	3800	3956	no	2	673	5134	MDAFQTLSQMLFCVMDKLREDVKAPAQHVKKIPAQTKASACNNGTDSAVIVA
nrxn1	XM_002935382	26311	PREDICTED: Xenopus (Silurana) tropicalis neurexin 1 (nrxn1), mRNA	3	3305	3485	no	2	673	5134	MLALASGTSLQIRSHSKRKQVMSHLPLSKPTLPCTFSSSSRLHLLMGSSSITAGMGMTSL
foxn2	NM_001017017	26329	Xenopus (Silurana) tropicalis forkhead box N2 (foxn2), mRNA	1	813	942	no	3	113	1115	MSSSQRTVGPEVMAARAFTARTIQILTMKKTCLETAAMYPSRA
fbxo11	NM_001097215	26334	Xenopus (Silurana) tropicalis F-box protein 11 (fbxo11), mRNA	2	328	586	no	1	345	1920	MKCLQTWLQKNQVLVHRIVHINSAEKLLSPKEPLVQQKAAWRVLLLQQLKTLATERNVPGYLENHRICLQLLQNSTFKRSFRMKWS
msh6	XM_002935375	26340	PREDICTED: Xenopus (Silurana) tropicalis mutS homolog 6 (msh6), mRNA	2	3988	4177	no	1	231	4245	MSARIQARRPSRSFTSSLKELVLKAMDLMLQGWLTFLMKLSRLATKKQENLKALRFPSGSSES
ttyh2	NM_204080	26380	Xenopus (Silurana) tropicalis tweety homolog 2 (ttyh2), mRNA	2	259	391	no	1	30	1632	MKRRQRRQVPAVSPGLLLCLAFSAVLQLALVSMGTVRPMMGFTS
LOC100495747	XM_002935383	26389	PREDICTED: Xenopus (Silurana) tropicalis dynein intermediate chain 2, axonemal-like (LOC100495747), mRNA	3	512	635	no	2	55	1816	MCSGTPMKSNAQPHICHGTQMVAGSWLWPTPVWTFSGHPKI
kif19	NM_001127076	26391	Xenopus (Silurana) tropicalis kinesin family member 19 (kif19), mRNA	3	491	641	no	2	202	1417	MPLYLHMVPQGVGKHTLCLGLTGSLEYIFAPLTISLKLLRKPAMIWNMKF
tshz2	XM_002935395	26424	PREDICTED: Xenopus (Silurana) tropicalis teashirt homolog 2-like (LOC100497744), mRNA	2	2554	2743	no	1	0	3165	MFHLKCPHYIRGKADSPTGILSIYSSYKLSLPQAFFRLQKESICCRTLALKNACRFQNLQDFL
map2k7	NM_001032352	26507	Xenopus (Silurana) tropicalis mitogen-activated protein kinase kinase 7 (map2k7), mRNA	2	757	1210	yes	1	9	1308	MVLYTEMLNPLTSCSMPMGRSNCVTLESVGALWTQRQRQGVPAVLLIWRLSELTLPTQPNQTTTSAQMYGVWGSPWWSWPPDSFPTKTVRLILRFSPKFSKKSHPYSPTIWASPHYFSHLLRTVLLKITERGQSTISCWSTHSCVVMRQLK
LOC100488304	XM_002935405	26534	PREDICTED: Xenopus (Silurana) tropicalis latrophilin-1-like (LOC100488304), mRNA	1	1281	1500	no	3	518	4874	MTLPPIDGVARLILTWLWMRMDCGLSTQLKATVEGWWSASSTPTHYDSKALGKQPMTNVQLPMRLWPAVSFMF
LOC100488304	XM_002935405	26535	PREDICTED: Xenopus (Silurana) tropicalis latrophilin-1-like (LOC100488304), mRNA	1	2904	3039	no	3	518	4874	MPTVHSGIILSDLCWVTGPPRAAGWYKPTRLIRPVHAATSLTLLC
LOC100488304	XM_002935405	26536	PREDICTED: Xenopus (Silurana) tropicalis latrophilin-1-like (LOC100488304), mRNA	1	696	1044	no	3	518	4874	MLIMGGRMTRSVMRTHSKWRMFNATCLMPSKSCHKGVTIAHSVLLLLDQTPFLIRVQEPTSTWKSSMTASHTKWSKKFSSVREPYRKYWSPLPPMNPNTNQEHGVEIPCRLVSVSM
LOC100488304	XM_002935405	26539	PREDICTED: Xenopus (Silurana) tropicalis latrophilin-1-like (LOC100488304), mRNA	1	1086	1260	no	3	518	4874	MLHGRSMPQVATPQHIDYLAEWMAQALWCTMELPSITKNVHAILSSLICGHGSRVERP
gipc1	NM_001011331	26560	Xenopus (Silurana) tropicalis GIPC PDZ domain containing family, member 1 (gipc1), mRNA	3	947	1115	no	2	145	1141	MICWKVTWGSGTVSSLAPWWNWEWINRTRTTFLRLWTARLGTLPSQTSLYSMCGGQ
tecr	NM_001008198	26573	Xenopus (Silurana) tropicalis trans-2,3-enoyl-CoA reductase (tecr), mRNA	1	414	612	no	3	77	1001	MVPSMILLPAGILWYTWPVSAILFITLNVYWRPCSSIVSLMVQCRSGISLRTVCITGDLQLGWLTT
dkk1	NM_001016283	26602	Xenopus (Silurana) tropicalis dickkopf 1 (dkk1), mRNA	1	669	921	yes	3	146	917	MVTSASDQPTAPQVYAAPVTSGRRSASRCLRKAKCAPSTGGKAPTGWRSSSVATAAPDSPVGYRRESLRPSLRPRDFTLARDTK
a1cf	XM_002935424	26612	PREDICTED: Xenopus (Silurana) tropicalis APOBEC1 complementation factor-like, transcript variant 1 (LOC100493284), mRNA	2	124	274	yes	1	21	1782	MVRGDMEVHLLVGTGHHQKEGVKYLSENFPVIYLRMNSYHCVKRQGKSMK
a1cf	XM_002935424	26614	PREDICTED: Xenopus (Silurana) tropicalis APOBEC1 complementation factor-like, transcript variant 1 (LOC100493284), mRNA	2	514	652	no	1	21	1782	MLSSTQALQTNQRIGGSPLLNTKVTERQPWQGESCYQDVSSCGDIQ
a1cf	XM_002935425	26621	PREDICTED: Xenopus (Silurana) tropicalis APOBEC1 complementation factor-like, transcript variant 2 (LOC100493284), mRNA	2	124	274	yes	1	21	1758	MVRGDMEVHLLVGTGHHQKEGVKYLSENFPVIYLRMNSYHCVKRQGKSMK
a1cf	XM_002935425	26622	PREDICTED: Xenopus (Silurana) tropicalis APOBEC1 complementation factor-like, transcript variant 2 (LOC100493284), mRNA	2	514	652	no	1	21	1758	MLSSTQALQTNQRIGGSPLLNTKVTERQPWQGESCYQDVSSCGDIQ
pten	NM_001123471	26645	Xenopus (Silurana) tropicalis phosphatase and tensin homolog (pten), mRNA	3	1649	1835	no	2	550	1756	MLVTMNLIIIDILTPLTLIQRMNLLMKIRSHKLQKSEGGFVVFFFFPLFFVFPQFFVFFVFF
stambpl1	NM_203679	26655	Xenopus (Silurana) tropicalis STAM binding protein-like 1 (stambpl1), mRNA	1	345	546	no	3	224	1511	MKTSRPGATSAPEWRWREWRLCIWKKETLKMPLFSTTNLLRYLLRNCPDTEIISNMKSPKSRIFSRN
acta2	NM_001011250	26659	Xenopus (Silurana) tropicalis actin, alpha 2, smooth muscle, aorta (acta2), mRNA	1	480	606	no	3	47	1178	MPLAVLLVSYLTLVMVSPTTYQSMKGMLSLMQSCVLTWLAVT
acta2	NM_001011250	26660	Xenopus (Silurana) tropicalis actin, alpha 2, smooth muscle, aorta (acta2), mRNA	1	726	900	no	3	47	1178	MKWRPPPLPPLWKRATNFPTVRSSQLEMSVSAAPRPCSSHPSLVWNLLASMKPHTTAS
sec31a	NM_001011158	26690	Xenopus (Silurana) tropicalis SEC31 homolog A (sec31a), mRNA	2	2401	2548	no	1	144	2604	MPMYWQLRAVLLLLWLFSPPTHIKVMLCSYGKGYAVHKDRLILLLLLLG
sec31a	NM_001011158	26694	Xenopus (Silurana) tropicalis SEC31 homolog A (sec31a), mRNA	3	2798	3107	no	1	144	2604	MAWGVLLSISPNHHLLFLLLRPTTILLIPQLPKLQLSHCTLGLLCFLLPLPPLLLFLLLVVHPSSMVDQEPQLTLHIAHCLLLDLQVLCLPPVSCLHPREQVL
mfhas1	NM_001102937	26706	Xenopus (Silurana) tropicalis malignant fibrous histiocytoma amplified sequence 1 (mfhas1), mRNA	2	2344	2503	no	1	117	3108	MWKDFSFMDFYPLTSSGHFLNHISKRIKTYSLSWNSWKKWAFATASINRKTSF
fras1	XM_002935451	26715	PREDICTED: Xenopus (Silurana) tropicalis extracellular matrix protein FRAS1-like (LOC100487299), mRNA	2	10549	10717	no	1	0	12864	MEPDPLLRQSLTQLLLLVSITWSWTAFTSVGGSMYGVLPKLWIKLDMLGHHYEVIS
fras1	XM_002935451	26716	PREDICTED: Xenopus (Silurana) tropicalis extracellular matrix protein FRAS1-like (LOC100487299), mRNA	2	11938	12109	no	1	0	12864	MAESSGIQTKTSTLPTNFSLRRFIFAQEKMDMCLSLTQLEQFTMKVPSMVVYNLINT
LOC100489200	XM_002935463	26740	PREDICTED: Xenopus (Silurana) tropicalis tyrosine-protein phosphatase non-receptor type 9-like (LOC100489200), mRNA	3	1466	1598	no	2	118	2200	MRQRITSMPVSWMTIKGKMLTLQHKVLCQKHLMIFGVWCGNRGF
LOC100488255	XM_002935457	26777	PREDICTED: Xenopus (Silurana) tropicalis thrombospondin type-1 domain-containing protein 4-like (LOC100488255), mRNA	2	3652	3793	no	3	272	4550	MQPSGKAQRNADLSAPYLQPLGDPVQLEHVLRYVRAGPEDSTCSLCQ
cers2	NM_001097273	26830	Xenopus (Silurana) tropicalis LAG1 homolog, ceramide synthase 2 (lass2), mRNA	3	854	1091	yes	1	87	1221	MEGDMQWYLHSLRSGVHSHPNHYLPFLDPVLHLVLPPGGLSSFLWLLLLQCDALGTPMFAHLLGLPDSWNGPQVYHWKA
setdb1	XM_002935469	26834	PREDICTED: Xenopus (Silurana) tropicalis histone-lysine N-methyltransferase SETDB1-like, transcript variant 1 (LOC100490309), mRNA	2	2731	2884	no	1	129	3981	MQVRSSQTTLRTKRAWRWGTSTLLTWTTLKVSRTIRKAMRVTPSLPPIAVA
setdb1	XM_002935469	26835	PREDICTED: Xenopus (Silurana) tropicalis histone-lysine N-methyltransferase SETDB1-like, transcript variant 1 (LOC100490309), mRNA	2	2902	3160	no	1	129	3981	MRKTLAAKTRTSPMTVQMTISARTRTSRPAQCGAVTPPADRHGARRRMEHQRLLPRTRLWPGRPVRMKPRIANCRRRPPRTRWLPG
setdb1	XM_002935470	26841	PREDICTED: Xenopus (Silurana) tropicalis histone-lysine N-methyltransferase SETDB1-like, transcript variant 2 (LOC100490309), mRNA	2	2728	2986	no	1	0	3807	MRKTLAAKTRTSPMTVQMTISARTRTSRPAQCGAVTPPADRHGARRRMEHQRLLPRTRLWPGRPVRMKPRIANCRRRPPRTRWLPG
setdb1	XM_002935470	26843	PREDICTED: Xenopus (Silurana) tropicalis histone-lysine N-methyltransferase SETDB1-like, transcript variant 2 (LOC100490309), mRNA	2	2557	2710	no	1	0	3807	MQVRSSQTTLRTKRAWRWGTSTLLTWTTLKVSRTIRKAMRVTPSLPPIAVA
frs2	NM_001017182	26871	Xenopus (Silurana) tropicalis fibroblast growth factor receptor substrate 2 (frs2), mRNA	3	191	326	yes	2	0	1306	MAMIPICFPLSVAEDVQLEKVYLASGACVLKTYLTCSRITCRIIE
slc25a46	NM_001016130	26883	Xenopus (Silurana) tropicalis solute carrier family 25, member 46 (slc25a46), mRNA	1	498	618	no	3	110	1358	MHGITSCLHLVLLILCTASLKHRASELFGKEWEAHLLFRA
pja2	XM_002935473	26894	PREDICTED: Xenopus (Silurana) tropicalis praja ring finger 2 (pja2), mRNA	1	1329	1509	no	3	137	2168	MKALSAVMENGLHACLHIFLRTKTIRQVMIAGKHCLEKMNTKFLVTAVVWKKKILTFVFK
fer	NM_001016902	26898	Xenopus (Silurana) tropicalis fer (fps/fes related) tyrosine kinase (fer), mRNA	2	1546	1672	yes	1	90	2079	MGNLVNMSFLCFQIHNGGTLSFSLLIINIDLKELDFQQSHNL
ctnna2	NM_001097305	26912	Xenopus (Silurana) tropicalis catenin (cadherin-associated protein), alpha 2 (ctnna2), mRNA	3	2342	2588	no	2	394	3292	MIQTLNKRIMMSEAGPVFRLRMTSLLLAKVPERSWLNFHKKRKQKLRSKWRSSIKRRANWMLKWPNGMTAEMTSLSWPNRCV
tor1b	NM_001016237	26935	Xenopus (Silurana) tropicalis torsin family 1, member B (torsin B) (tor1b), mRNA	2	697	844	no	1	84	1065	MLEEKSSQSWLWISGRMGKRGKTLISLRSSISYHLLHSITKTADFGTAA
usp20	NM_001097172	26940	Xenopus (Silurana) tropicalis ubiquitin specific peptidase 20 (usp20), mRNA	2	1900	2035	no	1	21	2673	MSLMISTSRRSMRRWFRMQRPMFSSTGRAARRQSGSGRRWCPWQP
fnbp1	NM_001079194	26949	Xenopus (Silurana) tropicalis formin binding protein 1 (fnbp1), mRNA	3	587	725	no	2	235	2050	MKVARRSNTSRHAGNSWKQVKEGLNGTAKRLNERSNTLRKWMPTLT
zer1	NM_001127966	26963	Xenopus (Silurana) tropicalis zer-1 homolog (zer1), mRNA	3	2168	2432	no	2	151	1753	MPAGCCLTSCSMGPRPGSLVSRPDKRWKNGCGALSAAGTSARGGISTTGLLNQSCGSSLRVFPQSASTGQPGPCITWCLYTRTNTAPC
LOC100145241	NM_001126725	26971	Xenopus (Silurana) tropicalis hypothetical protein LOC100145241 (LOC100145241), mRNA	1	1383	1542	no	3	98	2900	MSAMECVCSWNPRGSFLQRSCSVTQLLREGAKSRGRSGYFPSRKERTSCGPHK
sptan1	NM_001097205	26986	Xenopus (Silurana) tropicalis spectrin, alpha, non-erythrocytic 1 (alpha-fodrin) (sptan1), mRNA	3	290	458	no	2	136	7549	MLMNWRNGSRRNSRSHLMRTTKIQPICRANCRNTRLLRQKYRPMQGQLSNWTKLET
sptan1	NM_001097205	26987	Xenopus (Silurana) tropicalis spectrin, alpha, non-erythrocytic 1 (alpha-fodrin) (sptan1), mRNA	3	2270	2441	no	2	136	7549	MFKTCRKNTPCWRLMLQLTRTVSMASLSKPVSSKKLVILMLTISGRNRRPLLIDMKL
sptan1	NM_001097205	26990	Xenopus (Silurana) tropicalis spectrin, alpha, non-erythrocytic 1 (alpha-fodrin) (sptan1), mRNA	3	4298	4448	no	2	136	7549	MPEQALFRPLSSLGSNFWLVVIMIVLKSRRSWISWNRNGQVWKRLGWNAE
sptan1	NM_001097205	26991	Xenopus (Silurana) tropicalis spectrin, alpha, non-erythrocytic 1 (alpha-fodrin) (sptan1), mRNA	3	4814	4958	no	2	136	7549	MRSKPGSARNCRPPVTSPTKTPQTSRANTRSTRLSKLSSMPTLTVFVE
lrrc8a	XM_002935506	27038	PREDICTED: Xenopus (Silurana) tropicalis leucine-rich repeat-containing protein 8A-like (LOC100492279), mRNA	1	729	858	no	3	122	2549	MWKQQCLCSRGASQGSSRGLWTGQRRVCWTKRKESKPKHCLKR
lrrc8a	XM_002935506	27042	PREDICTED: Xenopus (Silurana) tropicalis leucine-rich repeat-containing protein 8A-like (LOC100492279), mRNA	2	187	307	yes	3	122	2549	MVGRLHGLHLHRHAYDSSVRGHPAGHAGQDDLSSVQVGHS
atp2b3	NM_001131043	27076	Xenopus (Silurana) tropicalis ATPase, Ca++ transporting, plasma membrane 3 (atp2b3), mRNA	1	3897	4236	no	3	470	3941	MPPALLGIRVVKAFRSSLYEGLEKPESKTSIHNFMTTPEFLINDYIHNIPLIDDTDVEDSEEPPGKVLWSIPPPSPNKNNNAIDSGIYLTTDTSKSATSSNPESPLHSMETSL
atp2b3	NM_001131043	27078	Xenopus (Silurana) tropicalis ATPase, Ca++ transporting, plasma membrane 3 (atp2b3), mRNA	2	1636	1756	no	3	470	3941	MYPCLRAILCEILHHWSHCSSGGCARGAAPCCHHLISLFC
LOC100493388	XM_002935512	27086	PREDICTED: Xenopus (Silurana) tropicalis dual specificity protein phosphatase 7-like (LOC100493388), mRNA	2	712	910	yes	1	0	1104	MESFTTSRFLYQTTGAKTCPSFFQKPLSLLMRQRPTIAGYSCTVWLESADLSLSLWPTSCRSSTCL
abcd1	XM_002935513	27107	PREDICTED: Xenopus (Silurana) tropicalis ATP-binding cassette sub-family D member 1-like (LOC100493545), mRNA	3	2477	2630	no	1	573	2805	MHECSEHRCRRKDLPGCKGCWNSSAVNHSQAFPLEVPHPSAAVRRRRRLEI
LOC100490770	XM_002935498	27150	PREDICTED: Xenopus (Silurana) tropicalis collagen alpha-1(XXVII) chain-like (LOC100490770), mRNA	2	2725	3175	no	1	0	5391	MRGMRDQLGHQELQVWRGFLGGRAILGFLGQKVQRVKQATQEGLGRSVNRGFKDLLVQWERQELQGRREIVGELGVQDHQGKREQWVILGIQDLQVLRALLDHRVHLDQGVLRVCVVQKDAEVLEALMDQRENLDLQVLRVLLGYRASKV
fpgs	NM_001102943	27168	Xenopus (Silurana) tropicalis folylpolyglutamate synthase (fpgs), nuclear gene encoding mitochondrial protein, mRNA	2	685	862	no	1	84	1851	MTVPILSGTQWFAVSQHWISTTRVSWETRLRKLLGRRGEYLSQVSLHSQSTNLLDHWRC
LOC496414	NM_001011005	27282	Xenopus (Silurana) tropicalis hypothetical LOC496414 (LOC496414), mRNA	1	1887	2343	yes	3	92	4439	MVMLELKVPLALLVLLVREVNKVLLVVLASKVFLVPQVLLERVANLVNRVFLEMLVLLVLLVQEVKEVSLVNVALKVPLALRDHVVLMVLLAMMVLRVKLVLLVPLVAKDLPVFRECPVNAVLVVFLVQRVTEVTKELKAVMVHLAKMVSEV
LOC496414	NM_001011005	27283	Xenopus (Silurana) tropicalis hypothetical LOC496414 (LOC496414), mRNA	1	3900	4035	no	3	92	4439	MPLRSIVTWRLERPAYTQPRTALHRRTGTLARTHVRRSMSGSARQ
LOC496414	NM_001011005	27285	Xenopus (Silurana) tropicalis hypothetical LOC496414 (LOC496414), mRNA	1	870	1668	no	3	92	4439	MVQRVTLVLLVLRVSLVPLVRMALLGKWVLVVSLVREVVLVHLALLVHVVTMVLLVVLAPMVPLAQLDPLAFQEVLVPRVMLVPKGLVVLMVPKVVVVNLVPLVKLVLLVLLETLVVMVKLVLRVPLALLVLLVLLASQVLVVLLDLKALEVLLAPRVTMVNLVLKETRVSLVPRENLAQLVFKAPQDLLVKKEREDPVVSLDLLDLPDLLVNVVPLAAVVSLDLMVPLDLRVVLVNVVPLALLVLKDLLVNLDALVNLVFPVLRV
LOC496414	NM_001011005	27291	Xenopus (Silurana) tropicalis hypothetical LOC496414 (LOC496414), mRNA	1	456	840	yes	3	92	4439	MAFPDSLEFLDLQALLAHLALAETLLLKCLMVMMRNLLVFQCLVPWAQWVPAVLLAHLDHLDPKVSKDPLVNLVNPVLLVQWDPVAQQDLQERTVKMVKLANQAAPVSVDPQDPRVPVVFQEQLVFQA
LOC100491606	XM_002935563	27329	PREDICTED: Xenopus (Silurana) tropicalis gap junction gamma-1 protein-like (LOC100491606), mRNA	2	916	1306	no	1	0	1176	MPKWLTNRTGPTSLRSNNMAAVRTISPPVWSTCNGKSGLLRRGYKWPSKPTTAKAICPPPKKRRSRRAPTRAASAAALGMERCLCGFNVSADDLSPGGKASRVITSIRVNILDLLLFKVTHTAKGRGYRQ
eftud2	NM_001030366	27333	Xenopus (Silurana) tropicalis elongation factor Tu GTP binding domain containing 2 (eftud2), mRNA	1	2172	2343	no	3	62	2984	MKWCRFPGTGRSWESFFRPNMTGICLLPVLFGLLDQTQLDQIFWLMTRSPPRWIRRC
eftud2	NM_001030366	27335	Xenopus (Silurana) tropicalis elongation factor Tu GTP binding domain containing 2 (eftud2), mRNA	1	1047	1230	no	3	62	2984	MLTHTGTSITRSLQSDCGETSTSIRKPASSPRKPLQAAHNAVLWSSYWNLSTRFWLRWWGM
MGC147507	NM_001079354	27375	Xenopus (Silurana) tropicalis hypothetical protein MGC147507 (MGC147507), mRNA	2	208	394	no	1	165	1302	MQQCQSYRICLKMAHIVHLTKRCCGSTAITNRPRWDPVISHVLVSGILLANTNGMLGTDWAE
ddx42	XM_002935524	27418	PREDICTED: Xenopus (Silurana) tropicalis DEAD (Asp-Glu-Ala-Asp) box polypeptide 42 (ddx42), mRNA	2	1177	1297	no	1	102	2931	MEAAACGSKQKPYRKGRKLLCALRVDLLTMLRRKLPIFSV
limd2	NM_001011377	27435	Xenopus (Silurana) tropicalis LIM domain containing 2 (limd2), mRNA	1	315	510	no	3	77	464	MPHFMESFTASLTSSSSSRAKEITMKDLVADLIKICGPTRRRRRQETKHPEGPPVLGAPWLGGGF
fam76b	NM_001015947	27479	Xenopus (Silurana) tropicalis family with sequence similarity 76, member B (fam76b), mRNA	2	295	577	yes	1	9	1020	MDLHRHVNSASSNALLIGRRREEERLMESYCAGFVPSPIRGFFKRLKSNGKVWDQPIQIRLPLLLRRKISIILNITTTTIITTGTAAATTKLVV
LOC100494494	XM_002935577	27489	PREDICTED: Xenopus (Silurana) tropicalis myotubularin-related protein 2-like (LOC100494494), mRNA	2	469	637	no	1	0	2460	MAREAKRMRSTCSQSWMPTLSPTKSLSLMQGLVLTLWQIRLKVGGTRVKTPIRTQS
LOC100494494	XM_002935577	27490	PREDICTED: Xenopus (Silurana) tropicalis myotubularin-related protein 2-like (LOC100494494), mRNA	2	1408	1576	no	1	0	2460	MAREAKRMRSTCSQSWMPTLSPTKSLSLMQGLVLTLWQIRLKVGGTRVKTPIRTQS
drosha	NM_001113680	27494	Xenopus (Silurana) tropicalis ribonuclease type III, nuclear (rnasen), mRNA	2	1093	1333	no	1	45	4020	MKTYWKEMRKKMKNCLNQCGFVAPILRVTTLVTPWIKLETPQWLAQADYVIYMTSLKRSLESVRQQLELPGQHGSRQRPN
LOC100495587	XM_002935581	27503	PREDICTED: Xenopus (Silurana) tropicalis cadherin-6-like (LOC100495587), mRNA	1	948	1191	no	3	485	2861	MTMNQYSPKIFTLPLFPKCQKWGRLLFKLQQMMPMIQLMETVQELSTVFCRDSHTFLLSLRQVSLRQLYQTWTEKIENNIK
LOC100495587	XM_002935581	27505	PREDICTED: Xenopus (Silurana) tropicalis cadherin-6-like (LOC100495587), mRNA	1	2781	2943	no	3	485	2861	MITSVTGDLGLKNLPICMVAQTVTKTHNKLLFLFFKVGGTKQHLKMRSTYTYGS
cdh10	XM_002935584	27519	PREDICTED: Xenopus (Silurana) tropicalis cadherin-10-like (LOC100496218), mRNA	2	601	754	no	1	0	2445	MLVHTWCKLLLQMQMTLLMETVPKLYTAYFRDSHTFLWSLKQESFELHCQT
tmem2	XM_002935585	27564	PREDICTED: Xenopus (Silurana) tropicalis transmembrane protein 2 (tmem2), mRNA	3	2477	2660	no	2	454	4594	MQLLGLRMLGYGMSSTRCQQVIPMEFIQKPKQNSLLWACFITTECIQILRQGYSSIKVLRL
tmem2	XM_002935585	27565	PREDICTED: Xenopus (Silurana) tropicalis transmembrane protein 2 (tmem2), mRNA	3	3860	4217	yes	2	454	4594	MVTATAQLRDVKELRFRLLCDPKPPATVWPKHIQSIPKRQQQPSQCQRKQLPLALIVELLRWYSPVTLIMSTSQCSCSLLAKKKFSKVPQNHLYLLMAPSFHSKRTVYSLLSSMLALAP
tmem2	XM_002935585	27566	PREDICTED: Xenopus (Silurana) tropicalis transmembrane protein 2 (tmem2), mRNA	3	995	1175	yes	2	454	4594	MVVRFILEQRNAVINPKQILSYMVNQMKEIMCQFLARSSLVYQQVEHWNCMDQANYLGHC
LOC100487300	XM_002935596	27594	PREDICTED: Xenopus (Silurana) tropicalis protein FAM189A2-like (LOC100487300), mRNA	3	365	512	no	1	0	1719	MEEANGFASKPICHVIGGLCPAEPGRIYLGMPRGSVCIQCSQLSAGGNE
LOC100486127	XM_002935590	27614	PREDICTED: Xenopus (Silurana) tropicalis cytochrome P450 2J5-like (LOC100486127), mRNA	2	1336	1540	no	1	129	1617	MTNASGRPLISSTLTTFWTRMETFVRTRHFCRSLQDTGYVWENNWPGLSCSYSSPLFYVDSALSCQKE
glyctk	NM_001079160	27680	Xenopus (Silurana) tropicalis glycerate kinase (glyctk), mRNA	2	964	1960	no	3	113	563	MITKQLAMKGATIHELNTLRRALSHLKGGGLANIAYPAQVLSLILSDVIGDDLDIIASGPTVHCTHNKQECLQILSNFNLTKSVPVAVERALLAMPQEQLSTDFSHVHNILIGSNLIALQEAKEKSTELGYHTLLMSTAVNGDVKKVGYFYGCLAQVICAILTHNPKEALWEQELLAVASDLSIPDLNIAEKLEALRESRNVQSICILCGGETTVLVQGKGKGGRNQELALRVAQEWHKSPFCLSDCEVLFLSGGTDGQDGPTEAAGAYAYPALVRHAQESGLDAESFLTCSDSHTFFSQFQDGTYLLNTGLTGTNVMDVQVLLIRRATDGQ
bap1	NM_001008205	27684	Xenopus (Silurana) tropicalis BRCA1 associated protein-1 (ubiquitin carboxy-terminal hydrolase) (bap1), mRNA	2	493	733	no	1	108	2163	MQLGMLRNWQKLTTAMPDQSPVTCLRSRMGSVLSAPWKLFTLSVMFLLKDGFLSLMALKSTLLTMAPGQRMKNGQTRLAE
grm2	XM_002935616	27703	PREDICTED: Xenopus (Silurana) tropicalis glutamate receptor, metabotropic 2 (grm2), mRNA	3	950	1079	no	2	418	3010	MISLHAQSPLTSTRQKPWQRSFATSTGPMSPPWHLRETMVKRA
cacna2d2	XM_002935632	27728	PREDICTED: Xenopus (Silurana) tropicalis calcium channel, voltage-dependent, alpha 2/delta subunit 2 (cacna2d2), mRNA	2	487	667	no	1	0	1572	MSSSKTAWRTQRYCGKSLVAPPESPVITQPHLGGPPARSTCTMSVGDHGTYREPPRQRTW
mapkapk3	NM_001079394	27735	Xenopus (Silurana) tropicalis mitogen-activated protein kinase-activated protein kinase 3 (mapkapk3), mRNA	2	523	790	no	1	51	1176	MSSQKISSTPTRTATQSSRSQILAFPKKQQFRMHSRPHAIHHIMWLQKCWVQKSMISHATCGHWESSCIYFSVGILLSILTQVRPSPRV
LOC100495749	XM_002935620	27755	PREDICTED: Xenopus (Silurana) tropicalis protein VPRBP-like (LOC100495749), mRNA	1	2184	2463	no	3	209	4700	MQKFRNLPFRLSSTVFVLLKRESPALASMSLGHLEEGDLFVRPSIITDVESLHFPRCGMLSNLIMVSKFFCLCCLLKCPSRMPIRSGLWLARH
slc38a3	NM_001030377	27830	Xenopus (Silurana) tropicalis solute carrier family 38, member 3 (slc38a3), mRNA	3	335	527	no	2	241	1744	MTIKSWRSSCRTPLGKRSRDLQILRGRHPLECQCLTSAMQSWAVASWDWHMLWPILASSSSSYS
camkv	NM_001126509	27852	Xenopus (Silurana) tropicalis CaM kinase-like vesicle-associated (camkv), mRNA	3	728	923	yes	2	136	1267	MGGLWTVGRLESSCIYFCLETPRSMMSWKKRTTRAMTKICSGKFYMGIMSSTLPTGMIYHLQQKI
LOC100496572	XM_002935625	27860	PREDICTED: Xenopus (Silurana) tropicalis macrophage-stimulating protein receptor-like (LOC100496572), mRNA	2	3679	3823	no	1	66	4170	MCLTRNITVSDATRTPDCLLSGWLWRVYRPKNLPLRVMCGHLECCCGS
rbm5	NM_001017278	27877	Xenopus (Silurana) tropicalis RNA binding motif protein 5 (rbm5), mRNA	1	2313	2451	no	3	68	2561	MSNPQKMVSIIAILEIRCCRPWVGRRVQGWAERVRELQLLFRLRSE
nav3	XM_002935642	27890	PREDICTED: Xenopus (Silurana) tropicalis neuron navigator 3-like (LOC100486471), mRNA	2	3208	3397	no	1	0	6684	MVHKIKMILCYLVIQKLPYNIVVYHVLPSQVQVVFQEEEVIGQALAALTLMLVASQPVLLQLN
nav3	XM_002935642	27893	PREDICTED: Xenopus (Silurana) tropicalis neuron navigator 3-like (LOC100486471), mRNA	2	682	802	no	1	0	6684	MQLSLITVELQPIKKRQLDFQVLPGCQLQAAVPRVREQLI
nav3	XM_002935642	27894	PREDICTED: Xenopus (Silurana) tropicalis neuron navigator 3-like (LOC100486471), mRNA	3	6293	6491	yes	1	0	6684	MVYGPLELFSYSLSAGGSERGTSDVWEKSPLGRSIKVGIGDISLEYFFITAGKPSLITAETRGCRL
syt1	XM_002935639	27897	PREDICTED: Xenopus (Silurana) tropicalis synaptotagmin-1 (syt1), mRNA	1	2088	2241	no	1	567	1845	MTQFIITLLYIPVCQHLFLVCVFVCCKRFLICVYLDVFNKMFYFKLCKLTK
syt1	XM_002935639	27898	PREDICTED: Xenopus (Silurana) tropicalis synaptotagmin-1 (syt1), mRNA	2	1600	1801	no	1	567	1845	MNLLALKYHLNKYRKSKLSSLFWTMTRLEKMMLLEKCLWATTAQVRSSDIGQICWPIQDDQLHNGTP
LOC100486788	XM_002935644	27907	PREDICTED: Xenopus (Silurana) tropicalis heparan-sulfate 6-O-sulfotransferase 3-like (LOC100486788), mRNA	2	658	826	no	1	0	1266	MYVMEEAQLRMNYLHAMLEMTGLGSHCRSLWTVAIILQTTAKSGCLQTSALWDVTT
mbnl2	NM_001079299	27912	Xenopus (Silurana) tropicalis muscleblind-like 2 (mbnl2), mRNA	1	1122	1338	no	2	433	1369	MQIFSPSCTFAGQNQSCTTSSQPGCSGSSSSCRSCNSDDAVDCQSNEATSRSNCRSGFSSWRSSSLTKETSS
dock9	XM_002935647	27941	PREDICTED: Xenopus (Silurana) tropicalis novel protein containing a PH domain (LOC733822), mRNA	2	649	907	no	1	357	4344	MQRKKHRACLSQSVLERIIPIGMWSPINMKITQEISGSYLAKESNQKNYQYMCMRLMKMQTKMRTLLLLGLKRVESQSRGGCTKET
dock9	XM_002935647	27943	PREDICTED: Xenopus (Silurana) tropicalis novel protein containing a PH domain (LOC733822), mRNA	2	1873	2089	no	1	357	4344	MLNRHVVGLASTGCHLLGQQDHCLRIQTEHWTKMQDFLQSTDRTATKFQMKTCLSCLLIFENLRKWPSFQLF
tm9sf2	XM_002935649	27949	PREDICTED: Xenopus (Silurana) tropicalis transmembrane 9 superfamily member 2 (tm9sf2), partial mRNA	2	301	427	no	1	111	1827	MNMLRLIFAKIQEKNVHLKILVRCCLVKELNPPHISLYLTRK
col2a1	NM_203889	27957	Xenopus (Silurana) tropicalis collagen, type II, alpha 1 (col2a1), mRNA	2	2089	2545	yes	1	171	4647	MVKLVLKVPMVQLDLLVKEVNKDLLAHLASRDFLDLPVLPEKVANQVIRVFPVKQVPLVLLAQEVSVVSQVNVVLQVLKVFRVLVVFLELLVLMVPRVQLVHLVPMVPKVLLVFKVCLVREELLVYLDPRVIEVILVRKAQRVLLVKMVQEV
col2a1	NM_203889	27958	Xenopus (Silurana) tropicalis collagen, type II, alpha 1 (col2a1), mRNA	2	253	382	no	1	171	4647	MKKMSWPQAAACSMGRGIVIKMCGNQSPAKSVSVTLGMFSAMR
col2a1	NM_203889	27960	Xenopus (Silurana) tropicalis collagen, type II, alpha 1 (col2a1), mRNA	2	1072	2068	no	1	171	4647	MGQRVKLVLLVPREKVVLLVKLDLLVQWVPVVFQVREDALELLVLLVLVVMMVFLALLVPQDLLALLVLPVSLVLLVQRVKLAQLVLVDLRVLKDPEENLVPLDLLDLLELLVTLVLMVFLAPKVHLVLLVLLVPLVSLDHVVLQDLRELLVLLVPKARLVTPVLQVSRVNMVPKVKSGLQVLRVLLAQLVKKAREEPVVNLVLLDPLVLLEREVLLVIVVSLVKMVLLVLRVLLVNVVFQVLVDQRVLMVILAVLANLVSLVLGVLLAVLVMLVLREKLGPLVLLVKMVVLDLLGHKVLVVSLVLWVSLGLKVPMANLAKLVRKDCLVLLV
hdac7	XM_002935655	27974	PREDICTED: Xenopus (Silurana) tropicalis histone deacetylase 7 (hdac7), mRNA	2	2173	2377	no	1	0	2922	MYTMETGHNEYFTQTPTCCISHCIDMMMATFSRAVEQLMRLVQAMAKALMSMLHGRVVWIPQWGTWNT
birc5.1	NM_001044454	27993	Xenopus (Silurana) tropicalis baculoviral IAP repeat-containing 5, gene 1 (birc5.1), mRNA	1	78	222	no	3	14	494	MIMKLALQHSQTGPLLKTASAPQKIWPRLALYTAPLRMSLMLLVAFSA
pde1b	NM_001097267	28009	Xenopus (Silurana) tropicalis phosphodiesterase 1B, calmodulin-dependent (pde1b), mRNA	1	984	1164	no	3	248	1847	MRLRFWRLFLLRPSMILNIQERQTASTSRQSQTVPFCTMTARCWRITMSVLFIGLCKMMR
pde1b	NM_001097267	28011	Xenopus (Silurana) tropicalis phosphodiesterase 1B, calmodulin-dependent (pde1b), mRNA	1	486	711	no	3	248	1847	MSYQKCDQTLFHLKSGTGWPPHSPSRQGQLAGGLRRSPGFAALSMQYRRESSWKECFGDHTQQLDQIILRLLLTV
nckap1l	XM_002935658	28019	PREDICTED: Xenopus (Silurana) tropicalis nck-associated protein 1-like (LOC100491829), mRNA	2	1069	1219	no	1	0	3369	MNLDFWDPRHFLHLWLCPSAGMRLIGWYVMLKTSPKQRHQKITWMYKLQN
rps6	NM_203821	28067	Xenopus (Silurana) tropicalis ribosomal protein S6 (rps6), mRNA	2	88	217	no	1	30	777	MSASCVPSMRSAWLQRLLQIPWVMSGRDMSFASAVEMISKAFP
sh3gl2	NM_001097297	28081	Xenopus (Silurana) tropicalis SH3-domain GRB2-like 2 (sh3gl2), mRNA	2	919	1252	no	1	33	1080	MTLIQKMKVNLASRRVTSLLSPIRLMKTGMKGCFMASRASFQSITLTSWYLCPTKKHTRLYSLFHCFYSCFLQTTSTNCSGFKLLHSIVIFIGLYIYIYVIISSNVVFLFI
LOC100494907	XM_002935669	28093	PREDICTED: Xenopus (Silurana) tropicalis zinc finger protein basonuclin-2-like (LOC100494907), mRNA	2	583	808	no	1	0	3264	MVWDGHYGTMSVDTYFRILLAKSWTAGPLCHGKRRLSHFSSSSGLERPNPLWSSWPSKRKKDRLLLCPLQKQTLT
hnrnpa3	NM_001126556	28121	Xenopus (Silurana) tropicalis heterogeneous nuclear ribonucleoprotein A3 (hnrnpa3), mRNA	1	258	387	yes	2	112	1261	MGKAHRLCCYERSTDKAFQGLWVCYLLMRRGSRCCYVCKTTQS
hnrnpa3	NM_001126556	28122	Xenopus (Silurana) tropicalis heterogeneous nuclear ribonucleoprotein A3 (hnrnpa3), mRNA	3	776	1133	yes	2	112	1261	MAVVEVVVETLAEVVDLATEVAMVVVVVEDEVVVMAVVVMAATMDLVEKVVIMEVVLAMVAEVMEAAQAMETKVVDMVVAAVEEEEEDMMATMKAETLAVETIMTLETMEDSNNQTMVP
hoxd8	NM_001142117	28145	Xenopus (Silurana) tropicalis homeobox D8 (hoxd8), mRNA	1	228	543	no	3	152	845	MGRRLAAAGPRWYIAAAAAAPLRTTTTTPGPCRAQATSRPPVGLRATATPLSFMATIISRGSTFLRPIKRLSRSNILTVNRPVRVLERIQSTYIRTRLRLTCSPG
LOC100497640	XM_002935674	28150	PREDICTED: Xenopus (Silurana) tropicalis homeobox protein Hox-D9-like (LOC100497640), mRNA	2	619	742	no	1	0	834	MLVPPGKSAALTPNTKLWNWKRNFSSICTSPGTAATRWPGY
LOC100498102	XM_002935677	28160	PREDICTED: Xenopus (Silurana) tropicalis homeobox protein Hox-D13-like (LOC100498102), mRNA	2	412	658	no	1	0	900	MRCLPGPRRCLTSRATPTPTSMSLATWIWCPPLALGSPDTKRTSQWKATSHGLWLMAGTGKFIVLKTSPKPHTSGSPPSQEM
chn1	NM_001122793	28176	Xenopus (Silurana) tropicalis chimerin (chimaerin) 1 (chn1), mRNA	2	544	679	no	1	333	1335	MNRFPSMRKFIISRCTHSGALTGVNTVPTSCGDSSLRESNAQTVD
LOC100485826	XM_002935686	28205	PREDICTED: Xenopus (Silurana) tropicalis coiled-coil domain-containing protein 141-like (LOC100485826), mRNA	2	3961	4138	no	1	81	4314	MKCMKPIGSIILFMRARKKPNNCMLPITLLKPKIGCIQPQMISQVSCFNQTLPKAARDT
adamts1	NM_001127433	28265	Xenopus (Silurana) tropicalis ADAM metallopeptidase with thrombospondin type 1 motif, 1 (adamts1), mRNA	2	1378	2098	yes	1	162	2943	MAMESVCWTSPTDPSSSPQISLERYMMPINSANLHLETSPDIVQMQPARVRPCGAPESQEACLCAKPNIFLGQMEPVAEKESGALMESAWIRPTRSIMRLLYMAAGVLGASGENAQEHVMVVFSTLYASAITQSQRTVANTVKARGCSIDHATSRTVLKITERPTEKSSVKHTMTCLSHPLAVDLQLNGPPNMPECHPRIVANSCVAPKAPDTSLFSILRWLMEPHAAQIQPQCVSKGSA
adamts5	XM_002935694	28270	PREDICTED: Xenopus (Silurana) tropicalis A disintegrin and metalloproteinase with thrombospondin motifs 5-like (LOC100488158), mRNA	2	1009	1141	no	1	0	2739	MMSTTSTTMRLFSSPGRIYVGIIHVIPWEWQTLEPYAHRSAAVQ
adamts5	XM_002935694	28271	PREDICTED: Xenopus (Silurana) tropicalis A disintegrin and metalloproteinase with thrombospondin motifs 5-like (LOC100488158), mRNA	2	1603	1774	no	1	0	2739	MGNVWTKTKRNIIRFPATVIGALGDHGDNALAHVEEESSLHIATVITLPLRTAESIA
vcan	XM_002935704	28287	PREDICTED: Xenopus (Silurana) tropicalis versican (vcan), mRNA	2	949	1438	no	1	0	11586	MKMVLSNVMLGGFLTRLLDIQSARLEQPAMVIKWERKESVPMESVLFLRNTTCTVLWMNWKVTCFTRLLTKSSPLKKPNKSARRRMPLWPQWEICMRPGERDLTSVIMDGLLTAAFVTQYLWPDPSVEMVCLEFVPNTASVTRLISLIHWRDLMHIVSKAKGI
znf281	XM_002935702	28323	PREDICTED: Xenopus (Silurana) tropicalis zinc finger protein 281 (znf281), mRNA	3	788	932	yes	2	331	2719	MVKLLVYLQIRNLISVNTAVLLSGVPIICVDMSSSIQVKDLFSAVSAI
znf281	XM_002935702	28324	PREDICTED: Xenopus (Silurana) tropicalis zinc finger protein 281 (znf281), mRNA	3	1979	2207	no	2	331	2719	MSVQILSRHTTTRPACFKSTQNTFSKLWKEQAIQLLFHLVPVYSLSASLHLSQTIICFLTSKYTLHLLLIVDSISP
nxph3	NM_001103007	28352	Xenopus (Silurana) tropicalis neurexophilin 3 (nxph3), mRNA	1	624	1032	no	3	83	890	MLKRRNPRSSTAGLNLKRWIRQLKQVCAPMTRQKLVISSKLTVGSPGPALIHSRLFVFMSPFTPLITGWCKKSVLTTTTITALLTRLLAEEKTTMLDGDTSRNAKVEPTLELIWTSCAFGLVYCGVFVLVENVDTE
spop	NM_203672	28358	Xenopus (Silurana) tropicalis speckle-type POZ protein (spop), mRNA	3	596	737	no	2	274	1396	MPRERKPKQWRVSVPTGSFRGRTGASRNLSAGTFYLMRPMACFRMTN
slc35b1	NM_204087	28362	Xenopus (Silurana) tropicalis solute carrier family 35, member B1 (slc35b1), mRNA	2	385	505	no	1	69	1095	MRHVPCLISAPWCPAIPHSSLSTTPRRFWGNPVNQFQSCS
krt5.7	XM_002935742	28486	PREDICTED: Xenopus (Silurana) tropicalis keratin 5, gene 7 (krt5.7), mRNA	2	943	1189	no	1	0	1695	MKLNSVSCRNRSLTLQSSCLWTTTELWTWTASLPKSRLSMKTLPTRAVPMQRLCTRTSSRNCRPPLGDMVMTCAPPRLRFLN
racgap1	NM_001001236	28509	Xenopus (Silurana) tropicalis Rac GTPase activating protein 1 (racgap1), mRNA	3	1067	1190	no	1	81	1968	MPPSLYSYSGWHTCPYWRGHPSGFCSTDISNDSSNNCSLCQ
LOC100489966	XM_002935733	28511	PREDICTED: Xenopus (Silurana) tropicalis amiloride-sensitive cation channel 2, neuronal-like (LOC100489966), mRNA	1	735	894	no	3	59	1634	MSICLFGERQMKHPLRLELRFRFIAKMNPLSLTSWALVWLLDFKPLSPAKSND
cers5	XM_002935745	28519	PREDICTED: Xenopus (Silurana) tropicalis LAG1 homolog, ceramide synthase 5 (lass5), mRNA	2	442	733	no	1	0	1218	MHARSKDGSDIGGIRTSQAHLQNFVRACGGLHFTCIYFPMESDFFGRPHGSGIHDSAGIIILISHLLRGCTIITSKSWHSTGPLCSLSLQILSARIS
LOC100492173	XM_002935746	28533	PREDICTED: Xenopus (Silurana) tropicalis fibronectin type-III domain-containing protein 3a-like (LOC100492173), mRNA	2	2950	3118	no	1	0	3564	MKDLYPYIEDHVKHTKYKGSMSPRHTHFVFRHAMRLVRGLFPRNMFLQLQNHFQLP
spryd7	NM_001016934	28570	Xenopus (Silurana) tropicalis chromosome 13 open reading frame 1 (c13orf1), mRNA	3	428	635	no	2	0	586	MEKICIVQHLGSEGLSILLFMLTTAQFWTASSVSSITRLQQGLRRFSLSSRFSKDWTHLLQSQSFVLTT
LOC100496536	XM_002935760	28635	PREDICTED: Xenopus (Silurana) tropicalis inactive ubiquitin carboxyl-terminal hydrolase 54-like (LOC100496536), mRNA	2	817	1504	yes	1	135	2055	MAYQKVQLICARSGIGMKRSQTCKLYIMLAYRLVQTGICSGGQKMQDKDLENHFWKTQLEGGCRQLLVKVFQGRPQKKWSTILVEPHFHLCQRSLMAGTKAGSLRTMSCTVQRISGAWLAASVGQSSVAKKRQLSLLRALRHPMRGNRLWTAATALTAPPSTLIPKILLSYPLNPSTTQPSCSTHPLRDWRPAWWVQHTGHQEVPTSKKFWLCLTGVKMSKVTNSRGWH
LOC100497588	XM_002935766	28642	PREDICTED: Xenopus (Silurana) tropicalis neurotrypsin-like (LOC100497588), mRNA	1	1479	1626	no	3	128	2552	MGNGAVCVMMAGQMMMQLWFAGSWGTEVLPKQEQWPILERDKGPFTWIM
camk2g	NM_001114250	28671	Xenopus (Silurana) tropicalis calcium/calmodulin-dependent protein kinase (CaM kinase) II gamma (camk2g), mRNA	1	342	465	no	2	253	1942	MCEEIFQPGICCKNNKHQKAVCKRPPEIGAGGSDLPAFETP
camk2g	NM_001114250	28673	Xenopus (Silurana) tropicalis calcium/calmodulin-dependent protein kinase (CaM kinase) II gamma (camk2g), mRNA	1	762	900	yes	2	253	1942	MVWVCRNSRISLSRGVEKRSLWETSRHMGMRGNSVHITSGLPSFLG
csde1	NM_001030529	28707	Xenopus (Silurana) tropicalis cold shock domain containing E1, RNA-binding (csde1), mRNA	1	1029	1278	no	3	419	2816	MLSKRYSFTIVNLKVTLKPYNLEMMWNLQSRIEMVKKWQQTSGFCPKELLSLKILVLNILKELLPKLSLKYPTKIRMTLYQAV
csde1	NM_001030529	28708	Xenopus (Silurana) tropicalis cold shock domain containing E1, RNA-binding (csde1), mRNA	1	1821	2079	no	3	419	2816	MPKDFMDMWPPLKITLDSLKLQIMIKKFSFITVSIQEMWINWSWGIWWSTVCQKAREIKSVLRELPRLIKSMDQTMRWTQRFIGVR
dennd2c	NM_001079183	28719	Xenopus (Silurana) tropicalis DENN/MADD domain containing 2C (dennd2c), mRNA	1	1218	1593	no	3	482	3302	MRVTQNLLTLQFHLQNPKRLETGSSDLDLKGNHLNSKMFRLLGGSFIKQTTLRSQKNPGSLQDLPYITLCQKTISMRILCIQQRRIPMKTLKYHLYLYGAFRQHGSYHLHDAPSKHQRFLQSQIF
trim33	NM_001079564	28726	Xenopus (Silurana) tropicalis tripartite motif-containing 33 (trim33), mRNA	2	2656	2884	no	1	111	2244	MGNPLYGVQCTGHLEEMVVMVLTKMMTPMRIGVQCAKMEETSYVVKSALKFFTLLVMYPRCLVFPVVNGFVRSAEI
srsf3	NM_001005054	28750	Xenopus (Silurana) tropicalis serine/arginine-rich splicing factor 3 (srsf3), mRNA	3	251	686	no	2	79	571	MLQMLLESWMEGRYVGAELGSNYPMVRKEAETEDLPLHGTDGPGMTIVEEVHHQDADHQGGEAFLVAVAGLFLEIGGEKDHCPGKEIISHLALFLDQEAVLGPMSESEAATFSSVQKNTIEKGFLFLKCPTLFKIFFLFALYCNL
gpr161	NM_001130376	28767	Xenopus (Silurana) tropicalis G protein-coupled receptor 161 (gpr161), mRNA	1	1086	1242	no	2	172	1726	MAILYKCNLPPIDLWTVEQNCTKGTSWHVLWESVQRPISSATQNIKNVQHLK
gpr161	NM_001130376	28769	Xenopus (Silurana) tropicalis G protein-coupled receptor 161 (gpr161), mRNA	1	699	927	yes	2	172	1726	MAQRGRVHCFLAGLVRFVAFHSNDDLLRFHISSSKDKSTKDSLWNSYNCSGGFTKEWEKEFQYIYVLVRKQKKWIF
f5	XM_002935774	28798	PREDICTED: Xenopus (Silurana) tropicalis coagulation factor V (proaccelerin, labile factor) (f5), mRNA	1	4167	4401	no	3	107	5678	MHTGFLMKNHLKDFSMMMGPQTGLRKMMRLNQVKPIPMFGMPHTNQHLKMKAQIAEHGSIILELTRKKIYIQDFWAHC
LOC100493490	XM_002935788	28838	PREDICTED: Xenopus (Silurana) tropicalis uncharacterized protein KIAA0355-like (LOC100493490), mRNA	3	3473	3617	no	2	733	3931	MKPPQLMETVCSLCSQGQTLLLQLNRGENTVVVSRTLAHCHHHLYSPP
lsm14a	NM_213667	28852	Xenopus (Silurana) tropicalis LSM14A, SCD6 homolog A (lsm14a), mRNA	2	1105	1525	no	1	108	1515	MEKIRLILELIHRTVKAMQRRMMSWLVEFATMIKPNLSLIISPVMTIETEDRHGQKKEELTLKHSAFLSVQTEAVVVSEAEVVVWASVEGEAVVRGEAHQEVVALDLLGVTAVVPEEAEVVENLQNMSTGKTTKWQPSEG
chst8	NM_001079061	28861	Xenopus (Silurana) tropicalis carbohydrate (N-acetylgalactosamine 4-0) sulfotransferase 8 (chst8), mRNA	3	1460	1631	no	2	601	1912	MQIIIIIQYLAKQLFQSIGGTPQRRPCGQVLGCNLQNLSNTCLMFIGQWVWTFTGTM
pepd	NM_001008093	28865	Xenopus (Silurana) tropicalis peptidase D (pepd), mRNA	3	869	992	no	2	64	1558	MVICACLTWEGNITATVLTLPAPFLPMASSLQIRGLFMRLC
LOC100494496	XM_002935794	28870	PREDICTED: Xenopus (Silurana) tropicalis low-density lipoprotein receptor-related protein 3-like (LOC100494496), mRNA	2	1201	1417	no	1	0	2469	MSTLVKEEVASAIPPVIGATIRKTVLMALMKRIASLVNLVIFTVGPTCVSLRPGVAMAKKIARMEVMNRIAW
gpatch1	NM_001122719	28878	Xenopus (Silurana) tropicalis G patch domain containing 1 (gpatch1), mRNA	3	218	410	no	2	97	2665	MKKEGISVSMEHLQEDSLLGTLTLLVLKKVGHHLHLFLHVRGEVKEQSADLKILWMRRISVNLE
LOC100497325	XM_002935798	28901	PREDICTED: Xenopus (Silurana) tropicalis BTB/POZ domain-containing protein KCTD7-like (LOC100497325), mRNA	2	610	748	no	1	0	873	MSALSSTHCALKGVKASLNISSTTVRLMSPLGHGKQWQMCMTFFIV
vkorc1l1	NM_001016769	28909	Xenopus (Silurana) tropicalis vitamin K epoxide reductase complex, subunit 1-like 1 (vkorc1l1), mRNA	2	148	493	no	3	20	530	MRFQRVGSLLHRFVVQMGSGIWNVGFHLWKRQFIKPAKQCLWTRFLFTTDASRYDRERCSSPSTYDIIHCVSSGVRVPGIHPVLCAKGLLCYLCHHLLAELYSPYHQLQTTSLLE
c18orf8	NM_001102838	28911	Xenopus (Silurana) tropicalis chromosome 18 open reading frame 8 (c18orf8), mRNA	2	1960	2122	no	1	174	2139	MLQSRLLTTCFFTLSSVSLNKEISACEETLILHQENTVKNMLHYSNNYLANRLC
LOC100497898	XM_002935801	28962	PREDICTED: Xenopus (Silurana) tropicalis putative polypeptide N-acetylgalactosaminyltransferase-like protein 3-like (LOC100497898), mRNA	2	1348	1507	no	1	306	2100	MCMGERILSSVSRYGCVVEAWKFFHVPGLLTLNVRENRTLTTWISTPREMHYG
LOC100497898	XM_002935801	28963	PREDICTED: Xenopus (Silurana) tropicalis putative polypeptide N-acetylgalactosaminyltransferase-like protein 3-like (LOC100497898), mRNA	2	541	739	no	1	306	2100	MVYPNHLVLLKVMGAEEKVGFQLHSLQMKLRKPKDHMKSMATMSTSVTRFHWTGLYQIIDPLSARH
LOC100498056	XM_002935802	28965	PREDICTED: Xenopus (Silurana) tropicalis autism susceptibility gene 2 protein-like (LOC100498056), mRNA	2	3724	3976	no	1	0	2391	MLCSVFLRNKPSQKIMYTGTVVVAFSIVKRLLYTNLFAVYPVCNKFLSRTYVKRKKKVTEKEKKKINEETRSSACSSSAKTCVM
gja1	NM_203525	28970	Xenopus (Silurana) tropicalis gap junction protein, alpha 1, 43kDa (gja1), mRNA	2	688	1057	no	1	0	1137	MSPTKVSKMASRGKKTHILPQMILWFQERNVAPLNMLILMAVLLQLLPCLHLVTNLLLEKEILLLVAIITSKQVNKTGPITVQNKTGWGRLEAQFLTLMHSLLIFRMNIRILRKWHQDMRCSP
gja1	NM_203525	28971	Xenopus (Silurana) tropicalis gap junction protein, alpha 1, 43kDa (gja1), mRNA	2	139	277	no	1	0	1137	MNNQHLSAILNNQVVKMFAMISHSRSLMCVSGYFKSYLSQRLPSFI
pde7b	NM_001097313	28987	Xenopus (Silurana) tropicalis phosphodiesterase 7B (pde7b), mRNA	3	551	686	no	2	313	1654	MHQGFCEELCHKLLCTCWMRTILDRHGICCLKWGCGILTSSCLIA
myb	XM_002935809	28997	PREDICTED: Xenopus (Silurana) tropicalis v-myb myeloblastosis viral oncogene homolog (myb), mRNA	2	553	712	no	1	0	2316	MKRTNVWGIDGQKLQSFFLEELIMPSRTTGILPCVARLNRKVIFRNPKPTNPP
sgk1	NM_001030422	29010	Xenopus (Silurana) tropicalis serum/glucocorticoid regulated kinase 1 (sgk1), mRNA	3	848	1025	no	2	136	1390	MAPHLPFVALPSILHQKFYTNSLMTEQLTGGAWEQCCTRCCMACLLSTVETLQKCMTIS
eya4	XM_002935810	29020	PREDICTED: Xenopus (Silurana) tropicalis eyes absent homolog 4-like (LOC100487615), mRNA	2	889	1015	no	1	0	1968	MQTTPSQIQPTLQMLNRIILLIQLLAKTNIHSITQHQLMERI
pcnxl2	XM_002935822	29048	PREDICTED: Xenopus (Silurana) tropicalis pecanex-like 2 (pcnxl2), mRNA	3	3695	3860	no	1	36	6141	MANCLGFIIPCFRTAISYTSLCYAVPANLCHFNIFYSTEPISRQCHFYCIIRETS
LOC100491052	XM_002935815	29050	PREDICTED: Xenopus (Silurana) tropicalis solute carrier family 35 member F3-like (LOC100491052), mRNA	3	404	533	no	1	0	1254	MLQIFWRQWTDIKGISYKGSSIRCSLDTNKLSLFTCYKKNKHN
LOC779465	XM_002935823	29059	PREDICTED: Xenopus (Silurana) tropicalis KARP-1-binding protein (LOC779465), mRNA	2	3031	3244	no	1	0	4404	MLIKHLLLLKYQLPVQHQNRLLVRKLSQGLICLLSPVEQGWVLYQLAVTLKQQYHGVLVLLVLQNLHLEVV
adss	NM_203716	29073	Xenopus (Silurana) tropicalis adenylosuccinate synthase (adss), mRNA	2	574	769	no	1	141	1512	MASRSNNGKNKLGKIWAQQRRVLDQSILQKLLGVGSECVILFLTSVNSLRGLNCWLSSTSPCTHP
fmn2	XM_002935817	29125	PREDICTED: Xenopus (Silurana) tropicalis formin 2 (fmn2), mRNA	2	1858	2158	no	1	159	4986	MVRGQKVSQVIPENLVSRHLLQVFQMCLQDVLCWKSFLINRKMHLKKQRNFAPRSSLLVFCCLSVIVFVSSVAKVRHKFHPLLIKTSSIRGLQLVNQLTH
b3galnt2	NM_001011210	29146	Xenopus (Silurana) tropicalis beta-1,3-N-acetylgalactosaminyltransferase 2 (b3galnt2), mRNA	3	842	968	no	2	148	1612	MMEVGYSGLLQLKRGCCLMNSQKVLKALQEDLHILFMKVRHF
irf2bp2	NM_001001988	29160	Xenopus (Silurana) tropicalis interferon regulatory factor 2 binding protein 2 (irf2bp2), mRNA	2	2101	2239	no	3	590	2201	MPLGGIKCTMGLHAGRNCHHSCRGCKSEKRKGLLTFFSLVATIISN
shmt1	NM_001015914	29302	Xenopus (Silurana) tropicalis serine hydroxymethyltransferase 1 (soluble) (shmt1), nuclear gene encoding mitochondrial protein, mRNA	1	279	453	yes	3	29	1484	MVEPSLWMRWNVFARRGRWKCMVWTHKNGASMYSRTLGLLLTLPFTRPWWSPTGGSWV
LOC100486182	XM_002935844	29310	PREDICTED: Xenopus (Silurana) tropicalis Smith-Magenis syndrome chromosomal region candidate gene 8 protein-like (LOC100486182), mRNA	2	46	259	no	1	0	2805	MKSHFMAPLGCRKNTRCLCFPFPKPIAVPGPGCVLPNSAGTLFSSQSSLSKWGPSLFLPSLMISGFVASLT
top3a	XM_002935843	29316	PREDICTED: Xenopus (Silurana) tropicalis topoisomerase (DNA) III alpha (top3a), mRNA	1	1827	2013	yes	3	224	3287	MGLVLMPPTLSTLRPSSRACMWVSHQSRGFFLGSLEWGLWKGMILWALKCQNRTCALSWSRT
top3a	XM_002935843	29319	PREDICTED: Xenopus (Silurana) tropicalis topoisomerase (DNA) III alpha (top3a), mRNA	1	1524	1647	no	3	224	3287	MNSGSTSLLCATSWHVAPKMHRARRPRWRSTLLPSALSLMD
flii	NM_001015848	29328	Xenopus (Silurana) tropicalis flightless 1 homolog (flii), mRNA	2	2011	2332	yes	1	54	3864	MAWTSMYGEDLRPLSVTLPKPGCLLRRSIRMSERGRQRSYSSPMKWRRPNSGSCWAGSLRSSNPVFRMTSNRRVPNSTRLGSAWATWSCLRLTTRFPWSTRRGPRLN
llgl1	XM_002935846	29332	PREDICTED: Xenopus (Silurana) tropicalis lethal(2) giant larvae protein homolog 1-like (LOC100486472), mRNA	2	1726	1951	yes	1	0	3156	MAPSSSSLVSRPSRWCSACPRPLSLPSRCIQSGTWWRLALAMALGSLIITGGALCLPGALCTPMTRSLWRVPYPG
llgl1	XM_002935846	29335	PREDICTED: Xenopus (Silurana) tropicalis lethal(2) giant larvae protein homolog 1-like (LOC100486472), mRNA	2	2095	2269	no	1	0	3156	MTLTLPPCREGLSPARLMTPCRVSCVACILQTLSYGTRSIMAPPCGQAPIPALYLRTL
LOC100488159	XM_002935856	29346	PREDICTED: Xenopus (Silurana) tropicalis myosin-XV-like (LOC100488159), mRNA	2	2728	2887	no	1	0	8862	MQTIFGDFSMPWNLSASPGKTRTAFSEFFPPSCTWAMSTLRNMRQSPKRLHRW
rpl3l	NM_001030441	29431	Xenopus (Silurana) tropicalis ribosomal protein L3-like (rpl3l), mRNA	3	377	500	no	2	43	1264	MSARGVSIETGTRARKSLLQSTARNGKMKRARNSWKKTSRQ
rnf38	NM_001030334	29482	Xenopus (Silurana) tropicalis ring finger protein 38 (rnf38), mRNA	1	1392	1650	no	3	98	1490	MNFMPSVSTNGSRQIVLAQFVGQMLQKYIVIPNDQSQSTIKAWLFLVTCVCLCMRTHQLSIELNPRGFQPTLFTKGSMDLFLHCVI
LOC100497641	XM_002935892	29527	PREDICTED: Xenopus (Silurana) tropicalis inward rectifier potassium channel 2-like (LOC100497641), mRNA	2	283	445	yes	1	0	1407	MDTAMSSLLMSVRKDNDIYLISSPHVWTFVGGGCWSSFALLSFFLGSSLAVSFG
LOC100497641	XM_002935892	29529	PREDICTED: Xenopus (Silurana) tropicalis inward rectifier potassium channel 2-like (LOC100497641), mRNA	3	356	542	no	1	0	1407	MCGHSLAVDAGHLLPCFHSFLALLWLCLLANCSATRRLRCPRKPQAMCHPSQQLHSCFPFLH
ddx46	XM_002935898	29644	PREDICTED: Xenopus (Silurana) tropicalis DEAD (Asp-Glu-Ala-Asp) box polypeptide 46, transcript variant 1 (ddx46), mRNA	1	2466	2604	no	3	128	3275	MRPNRLWPTSGKNCRKQHLACRIRMMKIQLLILMSRLKACSIRRRE
ddx46	XM_002935899	29648	PREDICTED: Xenopus (Silurana) tropicalis DEAD (Asp-Glu-Ala-Asp) box polypeptide 46, transcript variant 2 (ddx46), mRNA	2	2263	2401	no	1	0	3072	MRPNRLWPTSGKNCRKQHLACRIRMMKIQLLILMSRLKACSIRRRE
ube2b	NM_001005124	29662	Xenopus (Silurana) tropicalis ubiquitin-conjugating enzyme E2B (RAD6 homolog) (ube2b), mRNA	1	444	627	no	3	104	560	MNQTQIALPTAKQRNCIKKTSESMRKGYLQSLSKVGMTPNRSLRFIPFVFFVFDLKFVKDK
ppp2ca	NM_203943	29668	Xenopus (Silurana) tropicalis protein phosphatase 2, catalytic subunit, alpha isozyme (ppp2ca), mRNA	3	428	587	no	2	298	1225	MSRKFGAQSQYVEMYTDNFTILWNCSELEANHQIQIICLWETMLTEDITLLKL
ppp2ca	NM_203943	29670	Xenopus (Silurana) tropicalis protein phosphatase 2, catalytic subunit, alpha isozyme (ppp2ca), mRNA	3	869	1025	no	2	298	1225	MRVQCVTYFGLTQMIVVAGAYHLEVQVIHLDRIYLKHSTMLMALLWFQEPIS
tcf7	NM_204090	29676	Xenopus (Silurana) tropicalis transcription factor 7 (T-cell specific, HMG-box) (tcf7), mRNA	2	865	1096	no	1	0	1092	MHCPEKNNQNTMNWPEKRGSYTCSYTQGGLQEITMEKEREEPEKNTRILVQTLAPLRNAELALASTNKQTGAVHADX
zmat2	NM_001005119	29689	Xenopus (Silurana) tropicalis zinc finger, matrin type 2 (zmat2), mRNA	3	41	281	no	2	16	613	MQTSVGSGTKMSMSNLHRSELQKKEKRKMANLYSPLRGNYSDTETIRWIWSPSWERPLSLQRPLHSLKWEATIAMSATVW
luc7l3	NM_001016304	29773	Xenopus (Silurana) tropicalis LUC7-like 3 (luc7l3), mRNA	2	769	1333	no	1	15	1317	MIKNARRRRRRKRKRSEKRERKKDGERRKLKKRREIARGRSAREAAPVAEIQAEHQTDVEADPVTIRGQGAETGREAGAESAKEAKATTEQKESTDHEAGKRGGLKAENVNLTNTNLEAGKETATENLKKKKNEAQMTKKAENPAVEKNRVTLEKLNRGSRLYRLRSMGRTKAINLKVTLSPIKTDLI
tnrc6c	XM_002935923	29837	PREDICTED: Xenopus (Silurana) tropicalis trinucleotide repeat-containing gene 6C protein-like (LOC100496469), mRNA	2	2335	2698	no	1	0	4989	MLTQRLKPLGESPHPRLLLSTKALRHGGSPKTALQVGGTALRNLPEHMEGQALLLLLLPPCCANQLPNLCKKAGVVVERRPAWAASGRKMRETCGTMLLLKTVTPPATRGATAPKKDFPRS
tnrc6c	XM_002935923	29840	PREDICTED: Xenopus (Silurana) tropicalis trinucleotide repeat-containing gene 6C protein-like (LOC100496469), mRNA	2	1513	1885	no	1	0	4989	MVQGGGGNTQALLLSMLLPKVVTLGARPLIRRTSRPPGVSLTSPNPKGGPTGKNQIQAGVLRAETGPTGPLFLNTLPTERKTGQGGTPTVSLDLGGTRTRGLGPAGGEMAQTPRIIPVQAGGSP
tnrc6c	XM_002935923	29842	PREDICTED: Xenopus (Silurana) tropicalis trinucleotide repeat-containing gene 6C protein-like (LOC100496469), mRNA	2	589	766	no	1	0	4989	MQCRQMDCQTGGWLSEWGASSHPTCKAFLVLMVQFLKSAGREVTARAARCGGYRRAARL
tnrc6c	XM_002935923	29843	PREDICTED: Xenopus (Silurana) tropicalis trinucleotide repeat-containing gene 6C protein-like (LOC100496469), mRNA	2	304	439	no	1	0	4989	MPTQLPGLYLDMKGLWEAAVLPAFQVQSVPLDRTWATRMETQLVV
tnrc6c	XM_002935923	29845	PREDICTED: Xenopus (Silurana) tropicalis trinucleotide repeat-containing gene 6C protein-like (LOC100496469), mRNA	3	2411	2558	yes	1	0	4989	MGEAQKQHFRLGGRLCGTSRNIWKDKRSCCCCCPHAVQTSSQIYARRLG
sec14l5	NM_001007909	29848	Xenopus (Silurana) tropicalis SEC14-like 5 (sec14l5), mRNA	1	1809	1959	no	3	179	2324	MPLLSSPGTLMCVKGISCSTSTIPSGPPRRPRGTHLEPMASPLLWATMCS
jmjd6	NM_001016203	29861	Xenopus (Silurana) tropicalis jumonji domain containing 6 (jmjd6), mRNA	1	672	909	no	3	5	1214	MRGEISRMRPSPGSPLFTRALSFRHGRLILNLWRFCRSLERRCLSQEVGGTWSSIWTPPSRLPRTLPAALISPLFGTKL
exoc7	NM_001016896	29930	Xenopus (Silurana) tropicalis exocyst complex component 7 (exoc7), mRNA	3	1331	1589	no	2	55	2080	MNQRRPVCQRMAQFMRSPAMPSCFCSSCWNFRRQQEPCLPPKRAVLQPALITLSSTAACSAPISVRFWGTYSCGSHTGSSRMKIPP
ppa2	NM_001011461	29936	Xenopus (Silurana) tropicalis pyrophosphatase (inorganic) 2 (ppa2), nuclear gene encoding mitochondrial protein, mRNA	2	262	436	no	1	21	888	MLQTYSLIKVISGTMGPCHRHGKIHLILMRTQALVVIMTQLMSVTLEARCVIEEMLLR
sar1a	NM_203514	29939	Xenopus (Silurana) tropicalis SAR1 homolog A (sar1a), mRNA	1	621	765	no	3	116	710	MLAQWRCLCAVCSSGKDMVKVSVGCPSTLTEFSLLPHYFFPFLGSARK
spock2	NM_001126515	29949	Xenopus (Silurana) tropicalis sparc/osteonectin, cwcv and kazal-like domains proteoglycan (testican) 2 (spock2), mRNA	1	819	1131	no	3	53	1310	MISSWIKQSWQLSTWTNMRFVFGHSSIPVTLIRMGEFPPQSGASASGERSHHALWSLRRFRYKKQLRESQGCSFPAVMRTATTGRCSVTRPVGNAGVWISTAQS
dnajb12	NM_001015991	29961	Xenopus (Silurana) tropicalis DnaJ (Hsp40) homolog, subfamily B, member 12 (dnajb12), mRNA	2	520	754	no	1	12	1131	MTSLERKRSVPHDMDTPTFTEDSRPTYLLKISSTCSLVVDSLLVMFMYIVMGECVTLTLKGKIGGNTKEMVPWECLYS
pla2g12b	NM_001007916	29975	Xenopus (Silurana) tropicalis phospholipase A2, group XIIB (pla2g12b), mRNA	2	382	556	no	1	21	609	MIRVGQTNTAVMPSFAGVCMLSALTSKKVWDSSPRWKHVSQWQTQFLTPFGLWDVNPS
mcu	NM_001130227	29982	Xenopus (Silurana) tropicalis coiled-coil domain containing 109A (ccdc109a), mRNA	3	752	902	yes	1	27	1044	MVGILLGYYGACHILYYLWERHGNVCLLCTNTPGIYLSRCQRQTVLTLFP
alox5	XM_002935972	30026	PREDICTED: Xenopus (Silurana) tropicalis arachidonate 5-lipoxygenase (alox5), mRNA	3	884	1010	no	2	25	1843	MNFWMVSLPTKLTPAQCNTLLLPSVCYTRTWKTRLSPLRYSS
LOC100216241	NM_001142208	30038	Xenopus (Silurana) tropicalis hypothetical protein LOC100216241 (LOC100216241), mRNA	1	2064	2340	yes	1	411	888	MDSLPRLLYYIKTLPVQVPLSILKMIQKRITKFICGSKSHRITHKILNTPTSRGGLGAPDVHKYYLEAHLHQAAHGQSEQSVGSRWLWKRTM
LOC100216241	NM_001142208	30048	Xenopus (Silurana) tropicalis hypothetical protein LOC100216241 (LOC100216241), mRNA	3	2906	3059	no	1	411	888	MHCYMTPTRLHAIYPNTSSTCWRQCGQEGTIDYIFWNCPVISGYWRTVLSF
ppp3cc	NM_001097302	30061	Xenopus (Silurana) tropicalis protein phosphatase 3, catalytic subunit, gamma isozyme (ppp3cc), mRNA	2	898	1081	no	1	186	1758	MKNHRNISVIIQCEGALTSIATQQFVSFYKIITCCQSSERMKPKMQVTECTEKVKLQGFLL
LOC100495469	XM_002935976	30076	PREDICTED: Xenopus (Silurana) tropicalis kelch-like protein 29-like (LOC100495469), mRNA	1	2643	2817	no	2	508	3142	MGNSGCPSQACALCCCHSVWRQDLRVRWGERGRPSGWGAAVLYTTNKHMELHRIPHDR
sf3b14	NM_001017249	30119	Xenopus (Silurana) tropicalis splicing factor 3B, 14 kDa subunit (sf3b14), mRNA	1	141	345	yes	3	17	392	MDPFDRSGSGTRQKPGARHMWSTKTYLMPRTPVIISPVSTSVTDTWLCCITTPTGRSRRWTQRRKRSS
opn5	XM_002935990	30154	PREDICTED: Xenopus (Silurana) tropicalis opsin-5-like (LOC100497642), mRNA	3	329	581	no	1	0	1029	MGWIFLWLRKPHYPDSSEPGQVPEDLPSAIRHLAEATPRFHCLGSYLGLCYPVGYLAIGRGGKLRSGTLWHHVYFGLVVGTGLC
rnf217	XM_002935993	30192	PREDICTED: Xenopus (Silurana) tropicalis ring finger protein 217 (rnf217), mRNA	2	1000	1171	no	1	264	1686	MNLPFCIACHMMTSSSINTSWNLAVWTRAPSPAHSASTLQHSGVKPTFQTSPNLRTS
rnf217	XM_002935993	30193	PREDICTED: Xenopus (Silurana) tropicalis ring finger protein 217 (rnf217), mRNA	3	1478	1646	no	1	264	1686	MQIPLPPRETPCKEISTRLCLCWKTSHCTTSHSFGFGTWSLGNCNRVIWFAYLLSL
LOC100490022	XM_002936023	30263	PREDICTED: Xenopus (Silurana) tropicalis serine/threonine-protein kinase MARK1-like (LOC100490022), mRNA	1	2064	2265	no	3	275	2273	MPTIVTTSRRSASFSSVSTGMPDKTALYSGKWRCASCLACPSMVCASRGYLGHLSPSRTLRPKLLMS
iars2	NM_001127043	30272	Xenopus (Silurana) tropicalis isoleucyl-tRNA synthetase 2, mitochondrial (iars2), nuclear gene encoding mitochondrial protein, mRNA	3	1700	1949	no	2	13	2989	MRVIMSKVAMCWTSGLTVERRGPMFWKMESRERMFIWKGRTSWEVGFSHRCSPVWPPGIRHRIGISSSMASPSVKKGRKCLNQ
LOC100492786	XM_002936031	30334	PREDICTED: Xenopus (Silurana) tropicalis e3 ubiquitin-protein ligase Rnf220-like (LOC100492786), mRNA	2	109	310	no	1	0	729	MLPYRANNHVLLVCQSQWIRKSIYLSLMVPIHSLQCTIAKVVCQGPSLIVTSHHPFFTFIHSLPLPI
chid1	NM_001008104	30337	Xenopus (Silurana) tropicalis chitinase domain containing 1 (chid1), mRNA	1	978	1146	no	3	194	1376	MTIQVPKDLALIRPSPGYKHAYSYWILNPNGERKSCWGYTFMEWITLRLVHPGSPS
ap2a2	NM_001001209	30345	Xenopus (Silurana) tropicalis adaptor-related protein complex 2, alpha 2 subunit (ap2a2), mRNA	2	445	715	no	1	105	2922	MPSRTTCQAATPPLWALPCTALLMWVAEKWLRHLLVRSPEFWWLGTLWTVLNRVPPSACYVSTAPLLISFSQMNGPRELSIFSTTSTWVS
LOC100493117	XM_002936033	30357	PREDICTED: Xenopus (Silurana) tropicalis mucin-6-like (LOC100493117), mRNA	2	3127	3475	no	1	0	4923	MMHVAAIQEGIVPACVMPYRPMPKLAWLLAFALTGEHQISARFIVTTRTHTFLQGMDMSTVLMLTARGITSLASALLLSRPTHTKTLKVATSVDPINTLTQNKILACHVLNIQQQQ
LOC100493286	XM_002936034	30379	PREDICTED: Xenopus (Silurana) tropicalis mucin-2-like (LOC100493286), mRNA	2	2491	2722	no	1	0	10326	MMEWMAVCQRTDALVSTIKNITIMERRSRWTAILVHARAADGTAPILCVMARVQSMGAATMSPLITRSMTLTETVNL
LOC100493937	XM_002936038	30431	PREDICTED: Xenopus (Silurana) tropicalis IgGFc-binding protein-like (LOC100493937), mRNA	2	10756	11092	no	1	0	12573	MTEKVHVFQKSNVLVFMTSSFSLMDLILRWTAIHAFARVASGYALIMHAMEHVQHIQMAITSRSMEKYMIFREPVNMWLPRTTVDTSLPMEHLASLQRASHVVPLELHAQKQ
LOC100494280	XM_002936040	30465	PREDICTED: Xenopus (Silurana) tropicalis mucin-5AC-like (LOC100494280), mRNA	2	3139	3370	no	1	0	7116	MLTHPHTMMLVFLTHVLVIPEGTVSVFALLLLPTPRHVENSLYVFIGGPQQFALCSVITITRKKGVNGIIGRAEHLA
cnksr2	NM_001100211	30502	Xenopus (Silurana) tropicalis connector enhancer of kinase suppressor of Ras 2 (cnksr2), mRNA	2	1600	1819	no	1	276	2442	MWWKRMQFCIATSMTKEDPACKVGGKARQPMENCVQFLCPWNIIGLGITKIPTRSRETVEEKVHCYVILAMTK
cnksr2	NM_001100211	30503	Xenopus (Silurana) tropicalis connector enhancer of kinase suppressor of Ras 2 (cnksr2), mRNA	2	2212	2350	no	1	276	2442	MRRKRKLKASSVCLNLKLIEPVNAVKNLHLKPAIPRSRASILLLTT
LOC100498261	XM_002936056	30529	PREDICTED: Xenopus (Silurana) tropicalis phosphorylase b kinase regulatory subunit alpha, liver isoform-like (LOC100498261), mRNA	2	34	229	no	1	0	3705	MATPGLFSRPYFVTRTQSQAFFLLAKSKKMPGCETMCTVFWLCGDWEWRIAKMLTGMRTKPKHMN
LOC100498261	XM_002936056	30530	PREDICTED: Xenopus (Silurana) tropicalis phosphorylase b kinase regulatory subunit alpha, liver isoform-like (LOC100498261), mRNA	2	871	1078	yes	1	0	3705	MAAVAFSEMALKHQERTPPDCTMTLLNSNSLRILNVNGLCSGHIYLLMEFLMGIRFRCKNIGKLWREFS
prpf8	XM_002936059	30553	PREDICTED: Xenopus (Silurana) tropicalis PRP8 pre-mRNA processing factor 8 homolog (prpf8), mRNA	3	2972	3122	no	2	247	7252	MTWNHWKKLLMPTWISTCGMKQIKEGFSLHGSSLQIQSHLPCWSTSGAKA
vrk1	NM_203624	30581	Xenopus (Silurana) tropicalis vaccinia related kinase 1 (vrk1), mRNA	3	704	863	yes	2	112	1342	MVLPTGIVQTVFTKSTKKTPENVIMAQLNLQVLMPTKESVLQEEETWKYWVIV
papola	NM_001142910	30584	Xenopus (Silurana) tropicalis poly(A) polymerase alpha (papola), mRNA	1	744	867	yes	2	67	2263	MGQTSQHLLKHTWFSWRCFMGYVGSKNVPAVSKCNCINSCS
atg2b	NM_001079158	30596	Xenopus (Silurana) tropicalis ATG2 autophagy related 2 homolog B (atg2b), mRNA	2	1105	1300	no	1	417	6618	MNFQHLQNVPLCVLHHRWKMSQNYHPAGTQSLYLSHIRNSLEMYQRLPIQDLYKLQHCLAKLSWA
bdkrb2	XM_002936066	30603	PREDICTED: Xenopus (Silurana) tropicalis bradykinin receptor B2 (bdkrb2), mRNA	2	430	568	no	3	110	1262	MWLTVLGHLYFQQISLALWKLSLCFHQWPDSVEPIWQHLFPYDGEH
dicer1	NM_001129918	30623	Xenopus (Silurana) tropicalis dicer 1, ribonuclease type III (dicer1), mRNA	2	5221	5422	no	1	0	5679	MILCNFNLKKMKCKAWILSYVGLKKTKRKKRTLKSQKLWETYLSHLQELFTWTAACLWKLYGMCIIL
LOC100491160	XM_002936071	30655	PREDICTED: Xenopus (Silurana) tropicalis cadherin-7-like (LOC100491160), mRNA	2	439	685	no	1	0	2349	MTMSLNFWMALTQLEFPKCLLLERQCYKLQQQMQMIQHMEIAPEFPTAFFKVNPIFQWSQRQELFEQPYLIWTEKPKISIFL
LOC100491607	XM_002936073	30671	PREDICTED: Xenopus (Silurana) tropicalis uncharacterized protein C18orf1-like, transcript variant 1 (LOC100491607), mRNA	1	957	1212	no	3	560	1490	MHQGQETGSSLLPLCRETVSAVSSQLIPTYSMRLTSLQQSPFLMVRNLHPTRGHVHCSYGTQSNRWSSIENLSEHLQTELFLTVT
LOC100491607	XM_002936074	30673	PREDICTED: Xenopus (Silurana) tropicalis uncharacterized protein C18orf1-like, transcript variant 2 (LOC100491607), mRNA	1	885	1140	no	3	599	1418	MHQGQETGSSLLPLCRETVSAVSSQLIPTYSMRLTSLQQSPFLMVRNLHPTRGHVHCSYGTQSNRWSSIENLSEHLQTELFLTVT
seh1l	NM_001011152	30684	Xenopus (Silurana) tropicalis SEH1-like (seh1l), mRNA	2	1111	1345	no	1	63	1143	MEHPLLAESTADTKLTGVTLLFCCLLHAQEWMPNSFSPSPPQSESSQDTWATCLLLDAVQKTLLCRFIFLFREKSYKI
gnal	NM_001142197	30731	Xenopus (Silurana) tropicalis guanine nucleotide binding protein (G protein), alpha activating activity polypeptide, olfactory type (gnal), mRNA	2	91	217	no	1	48	1185	MRKHSERPTRRSRSSCRRRGSPTKPHTDCCCWVLGNREKARL
st6galnac5	NM_001172277	30735	Xenopus (Silurana) tropicalis ST6 (alpha-N-acetyl-neuraminyl-2,3-beta-galactosyl-1,3)-N-acetylgalactosaminide alpha-2,6-sialyltransferase 5 (st6galnac5), mRNA	1	864	1107	no	3	188	1127	MFTEWFHLISAELPTIHWYLIIIMSLWDRMNAQCISHMSVEEKEAITGLLQRSVSLLTGHGPLIFTFFNQTGNQTHILESI
rabggtb	NM_001113165	30741	Xenopus (Silurana) tropicalis Rab geranylgeranyltransferase, beta subunit (rabggtb), mRNA	2	862	1015	no	1	48	1041	MKRPEGLLTDQETWWIHFIHCLALLGYLYWGKKELSQLIQCFACQKKSFRG
[truncated: 52,825 more rows]

## Sheet: homologs with human
Xenopus tropicalis			Homo sapiens								Xenopus tropicalis		Homo sapiens
[truncated: 3,782 more rows]
