# Supplementary material for: Direct Detection of Alternative Open Reading Frames Translation Products in Human Significantly Expands the Proteome
Source: PLoS One. 2013 Aug 12;8(8):e70698. doi: 10.1371/journal.pone.0070698 (PMC3741303; doi:10.1371/journal.pone.0070698)
Supplement: Database S7 — A database of alternative ORFs in Caenorhabditis elegans . For each AltORF, the gene name and accession number of the mRNA in which it is encoded is provided in the first tab. Other information can also be found for both the reference ORF and the alternative ORF, including the reading frame and the coordinates of the start and stop codon (with respect to the first nucleotide of the mRNA). The predicted amino acid sequence of the alternative protein is also indicated. The second tab displays the results of alternative protein conservation analysis against human. The gene name and accession number for nematode and human homolog proteins are provided, as well as standard BLASTP output, and similarity percentage. (XLSX) [file pone.0070698.s014.xlsx]

## Sheet: Celegans
			altorf				reference
gene symbol	mRNA accession	altorf id	frame	start	end	strong kozak	frame	start	end	alternative protein sequence
T24D1.1	T24D1.1b	2	1	2499	2706	no	3	398	2600	MKICQLLKRICAMVQKQQVLLQLIHLSSRLPSTHDSLAGFPPLSSRFFFLNFRILSVFMNTVVPQFSSG
T24D1.1	T24D1.1b	3	1	2931	3123	no	3	398	2600	MSNNIIVQLMTYFETSNCPMLPYKAQPFIVQMFISLKTLLIVLRFKFLNSIVFFHINMRFPSNL
T24D1.1	T24D1.1b	4	1	1590	1812	no	3	398	2600	MLAKEVVFFNFKVFNMDTCVLNLQKESIMFLTCYFGSKSSVHQTEQQFPFEDTRMFNKHSENFEVSLKECSDQI
T24D1.1	T24D1.1b	5	2	100	373	no	3	398	2600	MSPPAHLLSVNHLHQIHEKFITIISLRPPTSSATTKHLTNTPHYPVQTFSRKNTENNKNNSENHHQSILDRRRREGGGRGDADTLARRLIR
T24D1.1	T24D1.1b	6	2	415	586	no	3	398	2600	MQNAGLPSHRHNPTRNPVWFLNHLLSDGSQISDKSNNLWPRTTNWRFRLSRCDKSTC
T24D1.1	T24D1.1a.1	8	1	9	180	no	1	312	2136	MQNAGLPSHRHNPTRNPVWFLNHLLSDGSQISDKSNNLWPRTTNWRFRLSRCDKSTC
T24D1.1	T24D1.1a.1	9	2	2467	2659	no	1	312	2136	MSNNIIVQLMTYFETSNCPMLPYKAQPFIVQMFISLKTLLIVLRFKFLNSIVFFHINMRFPSNL
T24D1.1	T24D1.1a.1	10	2	1126	1348	no	1	312	2136	MLAKEVVFFNFKVFNMDTCVLNLQKESIMFLTCYFGSKSSVHQTEQQFPFEDTRMFNKHSENFEVSLKECSDQI
T24D1.1	T24D1.1a.1	11	2	16	319	no	1	312	2136	MPVSRATVTILLGILFGFSITYYLTALKSLTNPIICGPEQQIGGFDYLDVISQRADADVFTRSQSLPGHRRGLILVAIMTAAKYVDTRAYNELNQCMRICH
T24D1.1	T24D1.1a.1	12	2	2035	2242	no	1	312	2136	MKICQLLKRICAMVQKQQVLLQLIHLSSRLPSTHDSLAGFPPLSSRFFFLNFRILSVFMNTVVPQFSSG
T24D1.1	T24D1.1a.2	14	1	1416	1638	no	3	602	2426	MLAKEVVFFNFKVFNMDTCVLNLQKESIMFLTCYFGSKSSVHQTEQQFPFEDTRMFNKHSENFEVSLKECSDQI
T24D1.1	T24D1.1a.2	15	1	2325	2532	no	3	602	2426	MKICQLLKRICAMVQKQQVLLQLIHLSSRLPSTHDSLAGFPPLSSRFFFLNFRILSVFMNTVVPQFSSG
T24D1.1	T24D1.1a.2	16	1	2757	2949	no	3	602	2426	MSNNIIVQLMTYFETSNCPMLPYKAQPFIVQMFISLKTLLIVLRFKFLNSIVFFHINMRFPSNL
T24D1.1	T24D1.1a.2	17	2	229	412	yes	3	602	2426	MAEHMQNAGLPSHRHNPTRNPVWFLNHLLSDGSQISDKSNNLWPRTTNWRFRLSRCDKSTC
F35C12.2	F35C12.2b	19	3	353	485	no	1	69	531	MLCWNAFHHAHCIGLCYFLIGMEDEQDFRNPDDRFLRFLLRIFS
F35C12.2	F35C12.2a	21	3	1610	1742	no	1	0	1788	MLCWNAFHHAHCIGLCYFLIGMEDEQDFRNPDDRFLRFLLRIFS
W04A8.1	W04A8.1b	23	2	2038	2254	no	3	380	1994	MIFQFVPFKKIFQHFPSEIPGFWLISTKISLKLFILTLIILINNAISPGGLGKWRPRPSFSPEPARCTFCSF
W04A8.1	W04A8.1b	24	2	1711	1855	yes	3	380	1994	MASNRKFENFRQFPFENVDRARMYSRLCGFGLDDRKMRWKSNPPPASC
W04A8.1	W04A8.1a	26	1	2100	2316	no	2	55	2056	MIFQFVPFKKIFQHFPSEIPGFWLISTKISLKLFILTLIILINNAISPGGLGKWRPRPSFSPEPARCTFCSF
W04A8.1	W04A8.1a	27	1	1773	1917	yes	2	55	2056	MASNRKFENFRQFPFENVDRARMYSRLCGFGLDDRKMRWKSNPPPASC
W04A8.1	W04A8.1a	28	3	68	254	no	2	55	2056	MVSTRIFRQFMMMTMTSTAIPPISARRTLRKRPDARVIEQWALQFKSVGISVISAVFARKTR
T05F1.7	T05F1.7	30	2	952	1090	no	1	0	1359	MKNAKKNIWRRKKNLQRKSNKLKNQQMNKRPNWKEYGNAQNFSRDN
Y18D10A.5	Y18D10A.5.2	32	1	555	822	no	3	146	1232	MSNCTCISFSVHWPTFIALESVTVTLSLRICSLTRKAECLSSVILDLPNIWFAMSQTSRTFARDIIVLRSSFSALQTTRTRLTFGRLEL
Y18D10A.5	Y18D10A.5.2	33	1	276	396	yes	3	146	1232	MDHSEWYSLPNSLQQMKWLQSRKFFRTNDSRIVNYRLCEN
Y18D10A.5	Y18D10A.5.2	34	1	1107	1323	no	3	146	1232	MSSETRMHVFHLVDLFQHLRWTVQWELVKFQRQAVMWLAHRLKLLFFILILVLNFLSNVSFFFIFRGIFLFH
Y18D10A.5	Y18D10A.5.1	36	3	1109	1325	no	2	148	1234	MSSETRMHVFHLVDLFQHLRWTVQWELVKFQRQAVMWLAHRLKLLFFILILVLNFLSNVSFFFIFRGIFLFH
Y18D10A.5	Y18D10A.5.1	37	3	278	398	yes	2	148	1234	MDHSEWYSLPNSLQQMKWLQSRKFFRTNDSRIVNYRLCEN
Y18D10A.5	Y18D10A.5.1	38	3	557	824	no	2	148	1234	MSNCTCISFSVHWPTFIALESVTVTLSLRICSLTRKAECLSSVILDLPNIWFAMSQTSRTFARDIIVLRSSFSALQTTRTRLTFGRLEL
W02A11.8	W02A11.8	40	2	358	514	no	1	0	798	MRSSMFPKCFWPLNHLTSSFSSKIPTILKLLWMESFQKIFKISWNFSTVNQR
W02A11.8	W02A11.8	41	2	13	154	no	1	0	798	MLMLMIFTSMFIVEIRRNFVYRSSLLMLKSLFNQKMRKAVALKSFSV
C41G7.7	C41G7.7	43	2	109	412	no	1	0	468	MMFTGMVLRKIEKGLEAENLIKMVKASQLWITVLHGIMFIFQLPFKYYYSHIVNSLQKCSKYLKKSQFIHTSKDMMMLMSMESSENEEVECQRLLTDSKRN
F30F8.2	F30F8.2	45	3	782	911	no	2	103	1852	MMILDLKNFMHMLDKNLLEDFLMILVLITIKSHTIHSSMLVPL
F30F8.2	F30F8.2	46	3	602	728	no	2	103	1852	MFVRIMRVILPRIFHNYQELHRIVGQCLCVQLMDNGKCGVMH
ZK39.8	ZK39.8	48	2	109	289	no	1	9	687	MSISMVVVMKAAITEVVIIGAVTLAGPDSTVLPVAGVFEYSQELITNHSPNLAANHKELS
Y34D9B.1	Y34D9B.1b	50	3	209	431	yes	1	54	1641	MERRLRIHPHLQAPALRCLLRAAQILPVLRLLPDVQRETSQPNWSMPSIVSFRPGKVSSSAGKFRFQVARCDSL
Y34D9B.1	Y34D9B.1a	52	3	209	431	yes	1	54	1629	MERRLRIHPHLQAPALRCLLRAAQILPVLRLLPDVQRETSQPNWSMPSIVSFRPGKVSSSAGKFRFQVARCDSL
Y53C10A.10	Y53C10A.10	55	2	823	1018	yes	1	21	4704	MVRTSLETGVRWLLTSMGSTFCIRCRRRMSRISLIRIRLDKFWDIFMSLRSSAEMYLPVENLRLT
Y53C10A.10	Y53C10A.10	56	2	2308	2437	no	1	21	4704	MSPLQCRQLLRALSLQNLRLQRRVPRIQSPQLPWMLPLWILPQ
Y53C10A.10	Y53C10A.10	57	2	2806	3781	no	1	21	4704	MDHQIQISQVRMDQVQMDQMDHQIQISQDQVDQMGHQIQISQVQMDHQIQLSQVQVDQVQMDQVQMGQVQMGQVPMDQVQMGQLQIGQVQMGQVQMDQMDHQIQTSQDQMDQMGHQIRISQDQMDQMSHQIRISQDQMDQMDRQIQISQDQMDQMSHQIQISQDQMDQMGHQIRISQDQMDQMSHQIRISQDQMDQMDRQIQISQDQMDQMDHQIRISQDQMDQMSHQIRISQDQMDQMSHQIQISQDQMDQMDHQIRISQDQMDQMSHQIQISQDQMDQMDHQIQISQDQMDQMDHQIRISQDQMDQMSHQIQIGQDQMDQMDR
Y53C10A.10	Y53C10A.10	58	2	283	589	no	1	21	4704	MITSSRHLHQAQETVAEFIVLMNWKLIRVLIMRIFLLLQAQETVAKFRILMTWKLIHVLTTSPPPLAQGQSQSRPITRTSLLKKASNLKQFLLADANFSQLQ
Y53C10A.10	Y53C10A.10	59	2	3805	4546	no	1	21	4704	MDQMDHQIRISQDQMDQMDHQIQISQDQMDQMSHQIQISQDQMDQMDHQIQISQDQMDQMGHQIRISQDQMDQMSHQIRISQDQMDQMDRQIRISQDQMDHQIQVYLSRQQEEARARDQVQMNHQIQVYLGRQQEETRARDQVQMNHQIQVYLGRQQEETRARDQVQMDHQIQVYLSRQQEEARARDQLQIQELVIQTRILRRKAPRKIEKLQLLHPHPLLPQNPRLLIRPPRSQASCSIHTLLANS
W03D8.2	W03D8.2b	61	2	508	709	no	1	45	1137	MMNAWSSGRTMKERKCGECSLILSIVCRWRRLLEGRCSVHMVEFRLGWKVWRILIRSSVPWWSHRTA
W03D8.2	W03D8.2a	63	3	437	638	no	2	148	1066	MMNAWSSGRTMKERKCGECSLILSIVCRWRRLLEGRCSVHMVEFRLGWKVWRILIRSSVPWWSHRTA
C36B1.1	C36B1.1c.1	65	2	1279	1399	no	1	0	1950	MQVTREDQELDQQLLHGTQKQILMNHREMREFIIKIELFI
C36B1.1	C36B1.1c.1	66	2	1093	1219	no	1	0	1950	MFMQPRWSYSPQPVLRQLGNWHLPRHLNNYSFVLQTDGKKFN
C36B1.1	C36B1.1c.1	67	2	76	250	no	1	0	1950	MMIFHFCHPNKSPFNRKFVNSRRLQKTHQILVPFSKFMYHVTMHVSDRHEHLLKNVNL
C36B1.1	C36B1.1c.1	68	2	295	919	no	1	0	1950	MMRLHLKMMERVLKVRVLQKNSRKLKNHRNFKRYPIFHRHLLPHPHTQHLSWLHMIYAHTNNKLRQLHSKVPHLPINALKFVVENRDLKVHQETMESLDHTELRVIKEKEELMVLQDFMDPVVIRGCQVHLVCLALPDHLDHLVQVLDMDLELMGHKDHRDFLELLEEMEHRELKDKEDLKDHLDQKEMMVLVWKVLLMMILKELQEE
C36B1.1	C36B1.1c.1	69	3	1202	1346	no	1	0	1950	MERNSINPFPSICRNKTFNAKLSTKRCKSRGKIKNWISSCSMVPKSKS
C36B1.1	C36B1.1b	71	2	670	1303	no	1	0	2334	MMLHKVHDSVMNNGVLKVRVLQKNSRKLKNHRNFKRYPIFHRHLLPHPHTQHLSWLHMIYAHTNNKLRQLHSKVPHLPINALKFVVENRDLKVHQETMESLDHTELRVIKEKEELMVLQDFMDPVVIRGCQVHLVCLALPDHLDHLVQVLDMDLELMGHKDHRDFLELLEEMEHRELKDKEDLKDHLDQKEMMVLVWKVLLMMILKELQEE
C36B1.1	C36B1.1b	72	2	1477	1603	no	1	0	2334	MFMQPRWSYSPQPVLRQLGNWHLPRHLNNYSFVLQTDGKKFN
C36B1.1	C36B1.1b	73	2	163	421	no	1	0	2334	MQTHGFLEPKELNLCQQSGYREVLKLQSLIDYICHEIFSNNFLYLPLSSQWINEVVIYLLQLMHMIQQLILDCLLNQQEQSKRIFH
C36B1.1	C36B1.1b	74	2	1663	1783	no	1	0	2334	MQVTREDQELDQQLLHGTQKQILMNHREMREFIIKIELFI
C36B1.1	C36B1.1b	75	3	1586	1730	no	1	0	2334	MERNSINPFPSICRNKTFNAKLSTKRCKSRGKIKNWISSCSMVPKSKS
C36B1.1	C36B1.1a	77	2	748	877	no	1	0	3414	MTLKCAQSIALLTGNFALKNMILTLNVTQEHAHEYSIHHHLHI
C36B1.1	C36B1.1a	78	2	2557	2683	no	1	0	3414	MFMQPRWSYSPQPVLRQLGNWHLPRHLNNYSFVLQTDGKKFN
C36B1.1	C36B1.1a	79	2	1750	2383	no	1	0	3414	MMLHKVHDSVMNNGVLKVRVLQKNSRKLKNHRNFKRYPIFHRHLLPHPHTQHLSWLHMIYAHTNNKLRQLHSKVPHLPINALKFVVENRDLKVHQETMESLDHTELRVIKEKEELMVLQDFMDPVVIRGCQVHLVCLALPDHLDHLVQVLDMDLELMGHKDHRDFLELLEEMEHRELKDKEDLKDHLDQKEMMVLVWKVLLMMILKELQEE
C36B1.1	C36B1.1a	80	2	205	601	yes	1	0	3414	MEKEVFHREFLLKDQIALHLLLLDFRQIQITCLLFLRTMKQRERMVQKLWLLQKLGHQKEVKQKNYGLRLLFVQESMKNQPLEVHLYHGTIRIRRAHLKIQLIRHKNNMLLIMEYTKVIRNKRYVQMRKQFV
C36B1.1	C36B1.1a	81	2	2743	2863	no	1	0	3414	MQVTREDQELDQQLLHGTQKQILMNHREMREFIIKIELFI
C36B1.1	C36B1.1a	82	2	1243	1501	no	1	0	3414	MQTHGFLEPKELNLCQQSGYREVLKLQSLIDYICHEIFSNNFLYLPLSSQWINEVVIYLLQLMHMIQQLILDCLLNQQEQSKRIFH
C36B1.1	C36B1.1a	83	3	839	983	no	1	0	3414	MPTSTVSIITCTSNNTSYQSTRCSTIVFILQICITQLSSRSNESRNLS
C36B1.1	C36B1.1a	84	3	2666	2810	no	1	0	3414	MERNSINPFPSICRNKTFNAKLSTKRCKSRGKIKNWISSCSMVPKSKS
C36B1.1	C36B1.1c.2	86	1	1095	1221	no	3	0	1952	MFMQPRWSYSPQPVLRQLGNWHLPRHLNNYSFVLQTDGKKFN
C36B1.1	C36B1.1c.2	87	1	297	921	no	3	0	1952	MMRLHLKMMERVLKVRVLQKNSRKLKNHRNFKRYPIFHRHLLPHPHTQHLSWLHMIYAHTNNKLRQLHSKVPHLPINALKFVVENRDLKVHQETMESLDHTELRVIKEKEELMVLQDFMDPVVIRGCQVHLVCLALPDHLDHLVQVLDMDLELMGHKDHRDFLELLEEMEHRELKDKEDLKDHLDQKEMMVLVWKVLLMMILKELQEE
C36B1.1	C36B1.1c.2	88	1	78	252	no	3	0	1952	MMIFHFCHPNKSPFNRKFVNSRRLQKTHQILVPFSKFMYHVTMHVSDRHEHLLKNVNL
C36B1.1	C36B1.1c.2	89	1	1281	1401	no	3	0	1952	MQVTREDQELDQQLLHGTQKQILMNHREMREFIIKIELFI
C36B1.1	C36B1.1c.2	90	2	1204	1348	no	3	0	1952	MERNSINPFPSICRNKTFNAKLSTKRCKSRGKIKNWISSCSMVPKSKS
C36B1.1	C36B1.1d	92	2	748	877	no	1	0	3525	MTLKCAQSIALLTGNFALKNMILTLNVTQEHAHEYSIHHHLHI
C36B1.1	C36B1.1d	93	2	2668	2794	no	1	0	3525	MFMQPRWSYSPQPVLRQLGNWHLPRHLNNYSFVLQTDGKKFN
C36B1.1	C36B1.1d	94	2	1750	2494	no	1	0	3525	MMLHKVHDSVMNNGGVVERLRKSFRVEKVLKVRVLQKNSRKLKNHRNFKRYPIFHRHLLPHPHTQHLSWLHMTCFYQMILLLFHLSVVTVAPQLEIYAHTNNKLRQLHSKVPHLPINALKFVVENRDLKVHQETMESLDHTELRVIKEKEELMVLQDFMDPVVIRGCQVHLVCLALPDHLDHLVQVLDMDLELMGHKDHRDFLELLEEMEHRELKDKEDLKDHLDQKEMMVLVWKVLLMMILKELQEE
C36B1.1	C36B1.1d	95	2	2854	2974	no	1	0	3525	MQVTREDQELDQQLLHGTQKQILMNHREMREFIIKIELFI
C36B1.1	C36B1.1d	96	2	205	601	yes	1	0	3525	MEKEVFHREFLLKDQIALHLLLLDFRQIQITCLLFLRTMKQRERMVQKLWLLQKLGHQKEVKQKNYGLRLLFVQESMKNQPLEVHLYHGTIRIRRAHLKIQLIRHKNNMLLIMEYTKVIRNKRYVQMRKQFV
C36B1.1	C36B1.1d	97	2	1243	1501	no	1	0	3525	MQTHGFLEPKELNLCQQSGYREVLKLQSLIDYICHEIFSNNFLYLPLSSQWINEVVIYLLQLMHMIQQLILDCLLNQQEQSKRIFH
C36B1.1	C36B1.1d	98	3	2777	2921	no	1	0	3525	MERNSINPFPSICRNKTFNAKLSTKRCKSRGKIKNWISSCSMVPKSKS
C36B1.1	C36B1.1d	99	3	839	983	no	1	0	3525	MPTSTVSIITCTSNNTSYQSTRCSTIVFILQICITQLSSRSNESRNLS
C09D4.1	C09D4.1a	101	1	831	963	yes	2	139	1897	MDQALIDASRLFLGDICWPDNCWSISNVHIRHSTSIGCCMVWTR
C09D4.1	C09D4.1b.2	103	1	648	780	yes	2	289	1714	MDQALIDASRLFLGDICWPDNCWSISNVHIRHSTSIGCCMVWTR
C09D4.1	C09D4.1b.1	105	3	647	779	yes	1	288	1713	MDQALIDASRLFLGDICWPDNCWSISNVHIRHSTSIGCCMVWTR
B0207.4	B0207.4	107	3	602	752	no	2	7	922	MEPITVTQLTYGQSAFSAMSFSLENPHSSTKISPRHMRQSKRHGLLTLIL
K09H9.2	K09H9.2.2	109	2	1234	1357	no	1	3	1332	MFTNRKLLLISMLFRIVIMRFLNQMRCSIVACDNFSFIFCK
K09H9.2	K09H9.2.2	110	3	443	563	no	1	3	1332	MPGSSRFTDASEFSGENYRWKMLLNRRAVSPSGCFEHRTA
K09H9.2	K09H9.2.1	112	2	1252	1375	no	1	21	1350	MFTNRKLLLISMLFRIVIMRFLNQMRCSIVACDNFSFIFCK
K09H9.2	K09H9.2.1	113	3	461	581	no	1	21	1350	MPGSSRFTDASEFSGENYRWKMLLNRRAVSPSGCFEHRTA
Y20F4.3	Y20F4.3	115	2	1633	1771	no	1	0	2784	MVSKLVFLMHLLLLVIKDPMRCLSLLLTRNLLFHVFQRAVQIFNYQ
Y20F4.3	Y20F4.3	116	2	1345	1468	no	1	0	2784	MSLYSVQTDVYFCHHHFLNNSRRHFIYAFDRTQRFSNGFGY
Y20F4.3	Y20F4.3	117	2	133	316	no	1	0	2784	MPIICFRAHLPARFWFGKLARRDFICRYWIKTAIRNIYPSANSPHLTTFSKESVSRPFEIL
Y20F4.3	Y20F4.3	118	3	1370	1532	no	1	0	2784	MSISVTIISSTTAADTLFMLSTVHSVSQMDSDIEKPNNLSRRATTNASRNNISW
F47G6.1	F47G6.1	120	1	816	942	no	3	23	1793	MRVKSEVSQDFGINVSDAPIISCVKAVFGGEGRVKIIQMSTR
B0414.2	B0414.2	124	2	910	1036	yes	3	386	1289	MVSFTNDSNFPPIIFSAYLSRTTSFYLSCTLENSQRIDENSD
B0414.2	B0414.2	125	2	142	442	no	3	386	1289	MEMETLIGKTGMVYGRFRKSSGGEWWLDEETSITKSLDLSTAFMELLWFIGSTKKLHISILNGSTVVVSVTVLEVFWETNRNDQRLPSRSEFYRATTCTC
Y71F9AR.3	Y71F9AR.3	127	2	1090	1276	no	1	0	2238	MPVVLDILRLDRFYEDLELQQFQFYQIFMMILLMRKKRKIVKDRILLWVFWLLMSRHLPQLH
Y71F9AR.3	Y71F9AR.3	128	2	2095	2230	no	1	0	2238	MRMKNSVQHCTIIQLIQFYFLKLDHFGWLLIVRQMYQTILLFRKI
Y71F9AR.3	Y71F9AR.3	129	2	1384	1654	yes	1	0	2238	MEKMNGKRLDKPDFQISIHFQLIYTIDVELQLECLLEWRKLNRAKFSPMYSIFIDFIAQFNRIFSLFFTEMHLNMLPGFLENLRNSPNVT
Y71F9AR.3	Y71F9AR.3	130	2	82	310	yes	1	0	2238	MDRFETHIVIHISLLPQCCLIYLPVIPWIDTIQQRAHRSRRTRNASDSRQTGNIWHFTVMLVVRFLCSDIVDWRIL
Y71F9AR.3	Y71F9AR.3	131	2	820	970	no	1	0	2238	MENEMAGKLIHQFHLLRIGVHPVKRKNRGKNGRKLGKIHLFRISIRYLIN
Y71F9AR.3	Y71F9AR.3	132	2	544	745	no	1	0	2238	MRIFSQMSSRVPHQNEKLHHHQAPNSRIQRLQISQKQSNHQQLQTNIQRQVEQFHFIWQWSQRQRYH
Y52B11A.3	Y52B11A.3a.2	134	1	441	603	no	3	5	1661	MTRTSSVFPAQHFSVQIHLKMDMELVSRPFLTILEFHLSMMIGQSSPSTMLLFH
Y52B11A.3	Y52B11A.3a.1	136	1	441	603	no	3	5	1661	MTRTSSVFPAQHFSVQIHLKMDMELVSRPFLTILEFHLSMMIGQSSPSTMLLFH
Y52B11A.3	Y52B11A.3b.2	138	3	374	536	no	2	46	1594	MTRTSSVFPAQHFSVQIHLKMDMELVSRPFLTILEFHLSMMIGQSSPSTMLLFH
Y52B11A.3	Y52B11A.3b.1	140	3	374	536	no	2	46	1594	MTRTSSVFPAQHFSVQIHLKMDMELVSRPFLTILEFHLSMMIGQSSPSTMLLFH
Y47H9C.6	Y47H9C.6	142	1	507	669	no	1	51	468	MFQQFFQLSHIFPAATMNYNTYSISNIGFSINCDDVMLALFIFKMPVCQLFWIF
Y47H9C.6	Y47H9C.6	143	3	470	605	no	1	51	468	MSMASVISMLSVHVSTVLSIVTHFSRCYDELQYLFNFQYRIFYQL
C43H8.1	C43H8.1.1	145	2	379	514	no	1	9	474	MKQRLISSLQLIQTCKSTRSRRDAISMSLLTFDFYFTTSFSPFLA
C43H8.1	C43H8.1.2	147	3	377	512	no	2	7	472	MKQRLISSLQLIQTCKSTRSRRDAISMSLLTFDFYFTTSFSPFLA
H16D19.1	H16D19.1	149	2	526	685	no	1	0	1239	MHHSQLHREFAHKVVETLHLFILQMKLDILLPLRQKGITILERYGIMTPVSSG
F55H12.3	F55H12.3	154	2	4165	4318	no	1	0	8871	MIVLVMNISLWTEKMELHFANPIIVYSPTKQGIVVMIVPLAVKMPCFCVRT
F55H12.3	F55H12.3	155	2	4630	4837	no	1	0	8871	MGLTITTFVKMEEDVIKTSVCVNVYQVSLEHFVKQQLMNLIVLWMKRIAYSDFVDEKMLKCTVIVTMVI
F55H12.3	F55H12.3	156	2	5446	5815	no	1	0	8871	MMDLHLHVVMKFVMFAKQIYFFVKTLELAIQQHNHVIASITFRELIVREMRIYVKLTWSSAKTVELAIPKLDCVFVYPIIPVIIVIIKFIVVVILTVSTVERVLIITPRVHAYPVQQVIDVNI
F55H12.3	F55H12.3	157	2	7051	7258	no	1	0	8871	MIIYIQLIVDQCFMFAILWETTNTEGGLITQNKFIIFLLVVKLLQQFRQSMEPSLEVGNVNKFTNGFEM
F55H12.3	F55H12.3	158	2	3286	3490	no	1	0	8871	MTMSTSGVTLFLFAFLRQPLLQHLHRHLHQLCLQVLLQNIPHGQHKVPQRHRTVPHFHQIFLIFTMTL
F55H12.3	F55H12.3	159	2	6790	6994	no	1	0	8871	MRMLHFLITLELSELKSIIIMDSSLELESPQFVMLVLMLLEILQSVHLMSRYIKNRVHLKFMQRAELC
F55H12.3	F55H12.3	160	2	2377	2707	no	1	0	8871	MDPSSHMIHLNVIVPLIQISLIHVCLMDIMFNITDFIVASATLDINMSYWILTWENVLIVMSARKNQIIVTRLQHVTIQMVVLNVIVQLVIIYTMLIPLIFQLGQEFMMI
F55H12.3	F55H12.3	161	2	7702	7885	no	1	0	8871	MSTAQLDNLNQKVYAIHVQKVHLDQLQVFVNAFAVDLIYLLLGKEKRTWLIARKHAKQVRK
F55H12.3	F55H12.3	162	2	358	607	no	1	0	8871	MFLKLSLILLQYIIHYGQKGSHQKIFHPTNFPITALRLIFEILHFSDGELSPVLDNFQSSAKITHVFPELFDVLTIQNVFLHL
F55H12.3	F55H12.3	163	2	5872	5992	no	1	0	8871	MKENAWIYQMERRVIVVGLILLAEDVKQVPHSISIWFSTE
F55H12.3	F55H12.3	164	2	4444	4612	no	1	0	8871	MQFQIHSVFKTQHQRHLVYIVVIFVTVAKTANFSIHRIKEELGVFVLKTGMVVNAM
F55H12.3	F55H12.3	165	2	34	154	no	1	0	8871	MDLLSWNPLLFLDIMTRTCTAIAFKMHQDGIISQPRVFFH
F55H12.3	F55H12.3	166	2	2839	3013	no	1	0	8871	MQMIFVVPKGFHAFSNFKNIVLGRTYVRFPIQLQHVQLLIQQFIRIKLKPVHHFMSFK
F55H12.3	F55H12.3	167	2	3676	3796	no	1	0	8871	MFLNVIRMFKLESHHLQMDLFLLFLIFELLSIPLHREVLS
F55H12.3	F55H12.3	168	2	5143	5275	no	1	0	8871	MVEPVAFSTTTPQLKFQLNHIIAHVKQDTLERTVNQEFIHLVLT
F55H12.3	F55H12.3	169	2	8140	8287	no	1	0	8871	MSPILILVFRVLIYQKMQLLYLLHVNPHVRMQFQLLDVIVSYSKMERVQ
F55H12.3	F55H12.3	170	2	6112	6289	no	1	0	8871	MRYYHRGSLYVVTVAIHSRLFSITMASSSVMLEDNVIGACRIILRQLQLLLIRGIISVL
F55H12.3	F55H12.3	171	3	800	1040	no	1	0	8871	MHSPMDRTISQRSRFCFMDKMDVFYNFHYNFRRRKRSKWANCSEFKKCHVINNDFVFVICPHCIRHRHEKNRISNLLSRS
F55H12.3	F55H12.3	172	3	119	284	yes	1	0	8871	MVSSHSHVYFSIDSIRTKLFDSYSNVWSSQSQYRISRNQLAHSFTSSRTFLKSKQ
F55H12.3	F55H12.3	173	3	3026	3164	no	1	0	8871	MCQFSNVDDWSSQSVLYLGIKMGYVADLYLSKLLRSKAIYQTAFVD
F55F8.5	F55F8.5.2	175	1	1032	1197	no	3	8	1325	MLFQDFMIQKIEMEVWLNNHSLDIKMDGLKLSNGIRWIQINLLVFPPTKLRKCGM
F55F8.5	F55F8.5.2	176	1	588	939	no	3	8	1325	MQLKKEHLLRSSSFVVMNVPSNVFQSTRIRPVRFLDQSTQISKFGTWMHLMKQQHMRKKKKKKVRRNAERKKPKLKFRWLRLEGIVTKYPQSNGVHGILDTHFRARGIILLLNGIWN
F55F8.5	F55F8.5.1	178	1	789	1140	no	3	209	1526	MQLKKEHLLRSSSFVVMNVPSNVFQSTRIRPVRFLDQSTQISKFGTWMHLMKQQHMRKKKKKKVRRNAERKKPKLKFRWLRLEGIVTKYPQSNGVHGILDTHFRARGIILLLNGIWN
F55F8.5	F55F8.5.1	179	1	1233	1398	no	3	209	1526	MLFQDFMIQKIEMEVWLNNHSLDIKMDGLKLSNGIRWIQINLLVFPPTKLRKCGM
M01A12.1	M01A12.1	182	2	289	694	yes	1	0	834	MDMTENQVEMANLDVQQMVIVEWYVYVNAQQDDLDVKVEMDQKDQKDKEDVLVSKEIQRHRQYVVNLEKEEIRDSLELQDQPENQVNQDISMCLMDHLEKMEKQGHVGHQVRKEELEETEKMDYLVNEVNVDIKD
C27A12.5	C27A12.5	186	2	187	331	no	1	75	702	MNYVKNQERMSHFHRHSHILTFFFRMFKWLVRIRLFRVLEHQAVEIRI
T22H2.1	T22H2.1	191	3	623	947	no	1	0	1041	MVLFLPWCPHNDYSSTTPSTHVISNLPNAPGGSYQFSHANGHPRRIHHSPIGHLYDCSDHRDRRLARIRYGYHVHGGIPFHVSVQCYAVEQFHVSAGVKGEDFSSIET
Y39G10AR.11	Y39G10AR.11.3	194	3	1079	1352	no	2	85	2449	MRRPSSVMPWSASRRNGMLNVSNFVMKLVDCRKCCSNQPRKRWTSGRFSTRNLVNVAAKSTSSRACWQRNKQRRNDRLLDSWPRLMISMSN
Y39G10AR.11	Y39G10AR.11.3	195	3	1826	1976	no	2	85	2449	MLICTKERPRYCSQSSEISSKPTTNWRRRRIRRCWRQTTCGRQSSSRTWK
Y39G10AR.11	Y39G10AR.11.3	196	3	794	914	no	2	85	2449	MLLKLLRKLKTPIRLSALISKEEESRSARWKKSSTSTRAS
Y39G10AR.11	Y39G10AR.11.1	198	2	2491	2671	no	2	85	2449	MCPPLVCTNFYSRTDRKLVFYCFKNMYNCTISPFYSPPQSKNFISFLFFCFVNFKKFKNL
Y39G10AR.11	Y39G10AR.11.1	199	3	1079	1352	no	2	85	2449	MRRPSSVMPWSASRRNGMLNVSNFVMKLVDCRKCCSNQPRKRWTSGRFSTRNLVNVAAKSTSSRACWQRNKQRRNDRLLDSWPRLMISMSN
Y39G10AR.11	Y39G10AR.11.1	200	3	1826	1976	no	2	85	2449	MLICTKERPRYCSQSSEISSKPTTNWRRRRIRRCWRQTTCGRQSSSRTWK
Y39G10AR.11	Y39G10AR.11.1	201	3	794	914	no	2	85	2449	MLLKLLRKLKTPIRLSALISKEEESRSARWKKSSTSTRAS
Y39G10AR.11	Y39G10AR.11.2	203	3	1079	1352	no	2	85	2449	MRRPSSVMPWSASRRNGMLNVSNFVMKLVDCRKCCSNQPRKRWTSGRFSTRNLVNVAAKSTSSRACWQRNKQRRNDRLLDSWPRLMISMSN
Y39G10AR.11	Y39G10AR.11.2	204	3	1826	1976	no	2	85	2449	MLICTKERPRYCSQSSEISSKPTTNWRRRRIRRCWRQTTCGRQSSSRTWK
Y39G10AR.11	Y39G10AR.11.2	205	3	794	914	no	2	85	2449	MLLKLLRKLKTPIRLSALISKEEESRSARWKKSSTSTRAS
F49B2.3	F49B2.3	207	2	517	760	no	1	0	966	MTRAMSCPVCLVRYSDFGQLQQHLLEDNPPRLHANSMVHTAPHVLQDWVRLAVRKLGHGSLTHVIRFGMVRKNWVRGTRDL
F49B2.3	F49B2.3	208	2	124	421	no	1	0	966	MIPAPLFLDQVVPGWEWERADELNQALRRLGPVELGTIAHGTVRGILRFYPGDARTPVRHNGQMAPVRTVYARSYTTELRHERWSLVNLKKVSQQALSH
F25H2.9	F25H2.9.3	210	2	643	856	no	1	6	750	MSKSLLSNQQLTRRGVQSENSQECRTKSSIKLSHRFEEIILSWFFVSCFLWCKVTLFAMFSYFNKLFVVLX
F25H2.9	F25H2.9.1	212	1	645	858	no	3	8	752	MSKSLLSNQQLTRRGVQSENSQECRTKSSIKLSHRFEEIILSWFFVSCFLWCKVTLFAMFSYFNKLFVVLX
F25H2.9	F25H2.9.2	214	1	645	858	no	3	8	752	MSKSLLSNQQLTRRGVQSENSQECRTKSSIKLSHRFEEIILSWFFVSCFLWCKVTLFAMFSYFNKLFVVQK
ZK973.6	ZK973.6	216	2	12010	12265	no	1	0	25635	MMQSRDLEMLSTTPKRQLSQVVYPPLASSRIASLHISPLWLKLSTMFQPVLSLQPSLCVIVPLNSFLILKRTSKRLVTMKSAPMN
ZK973.6	ZK973.6	217	2	21181	21301	no	1	0	25635	MSKTKSTIWRTCLPIFLKTTQLLMNSDRRASGICHDSRIF
ZK973.6	ZK973.6	218	2	25198	25606	no	1	0	25635	MTMKMMKMKRKEAMRSRMTLEQRQKCSQHFIQMNIRTMFFETLVLKNSRRILNQEVNSTHLTVDLMDYFPQFLTIRLSVKNNSDDKDPVGDGYSELLCHFRHCLFYLWEPLVWFHIATTSTVANFSIISLKVLTLR
ZK973.6	ZK973.6	219	2	16396	16720	no	1	0	25635	MLMCNNSNKLLQPQKLLFRTLKKERVSGTNSLLLATTSMLSLNNSNNHWMQFLHNQNVQLRKPHRTLRISETIHNNFLISTTRLPICNVFPNFLIHLRVLTLMCDSLM
ZK973.6	ZK973.6	220	2	23890	24010	no	1	0	25635	MSKTKSTIWRTCLPIFLKTTQLLMNSDRRASGICHDSRIF
ZK973.6	ZK973.6	221	2	2557	2689	no	1	0	25635	MRSVNRFAIWKNAIGLLKDGRAPKSRNCVLNGISNCRNSNHGMR
ZK973.6	ZK973.6	222	2	697	823	no	1	0	25635	MQKLGISLADDVSRIWINNGEMEFYSVLLYLDGVQMSSACVK
ZK973.6	ZK973.6	223	2	15763	15883	no	1	0	25635	MSKTKSTIWRTCLPIFLKTTQLLMNSDRRASGICHDSRIF
ZK973.6	ZK973.6	224	2	10825	11149	no	1	0	25635	MLMCNNSNKLLQPQKLLFRTLKKERVSGTNSLLLATTSMLSLNNSNNHWMQFLHNQNVQLRKPHRTLRISETIHNNFLISTTRLPICNVFPNFLIHLRVLTLMCDSLM
ZK973.6	ZK973.6	225	2	6790	6940	yes	1	0	25635	MVLLSFLSKTQKELRRKLWTFERRRKMLIKQKLSFKSSVLFLTCQSRLST
ZK973.6	ZK973.6	226	2	9301	9556	no	1	0	25635	MMQSRDLEMLSTTPKRQLSQVVYPPLASSRIASLHISPLWLKLSTMFQPVLSLQPSLCVIVPLNSFLILKRTSKRLVTMKSAPMN
ZK973.6	ZK973.6	227	2	1225	1366	no	1	0	25635	MLAAQNEIFQNHSHQSPRGSPEPSIFYRDRWILMLLMQRRQSRCFKS
ZK973.6	ZK973.6	228	2	20290	20545	no	1	0	25635	MMQSRDLEMLSTTPKRQLSQVVYPPLASSRIASLHISPLWLKLSTMFQPVLSLQPSLCVIVPLNSFLILKRTSKRLVTMKSAPMN
ZK973.6	ZK973.6	229	2	13075	13324	no	1	0	25635	MPLAKMPKTPFSISPVKMEVMTTNHQTSLLMIAAAVLDLPLVTNWLHLPLSMPLAKMPKTPFSISPVKMEVMTTNHQTSLLMI
ZK973.6	ZK973.6	230	2	55	262	no	1	0	25635	MRTRRHRKTHSPDGSTFILKSTVHPVELRIFSKTSEMVFSYAISSKCSPERPLRFTKDEYRNEFITLQT
ZK973.6	ZK973.6	231	2	21814	22138	no	1	0	25635	MLMCNNSNKLLQPQKLLFRTLKKERVSGTNSLLLATTSMLSLNNSNNHWMQFLHNQNVQLRKPHRTLRISETIHNNFLISTTRLPICNVFPNFLIHLRVLTLMCDSLM
ZK973.6	ZK973.6	232	2	4705	4882	no	1	0	25635	MMIFSDRSKMRFAMITSLLLKTKKFSPNSQTPNRPFRTRHLKTSTFLPSLIVFKCNLIL
ZK973.6	ZK973.6	233	2	12901	13021	no	1	0	25635	MSKTKSTIWRTCLPIFLKTTQLLMNSDRRASGICHDSRIF
ZK973.6	ZK973.6	234	2	19105	19429	no	1	0	25635	MLMCNNSNKLLQPQKLLFRTLKKERVSGTNSLLLATTSMLSLNNSNNHWMQFLHNQNVQLRKPHRTLRISETIHNNFLISTTRLPICNVFPNFLIHLRVLTLMCDSLM
ZK973.6	ZK973.6	235	2	22999	23254	no	1	0	25635	MMQSRDLEMLSTTPKRQLSQVVYPPLASSRIASLHISPLWLKLSTMFQPVLSLQPSLCVIVPLNSFLILKRTSKRLVTMKSAPMN
ZK973.6	ZK973.6	236	2	13687	14011	no	1	0	25635	MLMCNNSNKLLQPQKLLFRTLKKERVSGTNSLLLATTSMLSLNNSNNHWMQFLHNQNVQLRKPHRTLRISETIHNNFLISTTRLPICNVFPNFLIHLRVLTLMCDSLM
ZK973.6	ZK973.6	237	2	17581	17836	no	1	0	25635	MMQSRDLEMLSTTPKRQLSQVVYPPLASSRIASLHISPLWLKLSTMFQPVLSLQPSLCVIVPLNSFLILKRTSKRLVTMKSAPMN
ZK973.6	ZK973.6	238	2	10192	10312	no	1	0	25635	MSKTKSTIWRTCLPIFLKTTQLLMNSDRRASGICHDSRIF
ZK973.6	ZK973.6	239	2	955	1174	no	1	0	25635	MCHSLFECSEKDHQCKEESNMKSSWLGLRLPIFYAQDMSSIRRNAHVFVVNSLSIVHCSTQLLLQKSIMMLKN
ZK973.6	ZK973.6	240	2	7660	7804	yes	1	0	25635	MVSALYFLRIDQKFNKQLIPYGRRNPTPILLNMPSKHSPFNPNYHQYL
ZK973.6	ZK973.6	241	2	14872	15127	no	1	0	25635	MMQSRDLEMLSTTPKRQLSQVVYPPLASSRIASLHISPLWLKLSTMFQPVLSLQPSLCVIVPLNSFLILKRTSKRLVTMKSAPMN
ZK973.6	ZK973.6	242	2	18472	18592	no	1	0	25635	MSKTKSTIWRTCLPIFLKTTQLLMNSDRRASGICHDSRIF
ZK973.6	ZK973.6	243	3	419	545	no	1	0	25635	MGMGCNWNGRANIISSTRSCCHCSITNTIIEKEPLESIITVR
ZK973.6	ZK973.6	244	3	176	314	no	1	0	25635	MPSHRSAHRRGPCGSQRTSIETSSSHCKLDNRVDSAASTRSRADKQ
Y105E8A.20	Y105E8A.20a.1	246	1	105	282	no	3	281	1499	MSTVVRFSKQLWRQNRLQNSFVIGFLLNFRIFSPIWNSRTRTSSVQRIRLTWKLFSTFG
Y105E8A.20	Y105E8A.20a.1	247	1	423	555	no	3	281	1499	MEPLLSGSKRKITCSDCQNSEKKWLNGLTGRILLSIRRNTSHWP
Y105E8A.20	Y105E8A.20a.3	249	1	108	285	no	3	284	1502	MSTVVRFSKQLWRQNRLQNSFVIGFLLNFRIFSPIWNSRTRTSSVQRIRLTWKLFSTFG
Y105E8A.20	Y105E8A.20a.3	250	1	426	558	no	3	284	1502	MEPLLSGSKRKITCSDCQNSEKKWLNGLTGRILLSIRRNTSHWP
Y105E8A.20	Y105E8A.20b	252	2	178	355	no	1	0	1572	MSTVVRFSKQLWRQNRLQNSFVIGFLLNFRIFSPIWNSRTRTSSVQRIRLTWKLFSTFG
Y105E8A.20	Y105E8A.20b	253	2	496	628	no	1	0	1572	MEPLLSGSKRKITCSDCQNSEKKWLNGLTGRILLSIRRNTSHWP
Y105E8A.20	Y105E8A.20a.2	255	1	108	285	no	3	284	1502	MSTVVRFSKQLWRQNRLQNSFVIGFLLNFRIFSPIWNSRTRTSSVQRIRLTWKLFSTFG
Y105E8A.20	Y105E8A.20a.2	256	1	426	558	no	3	284	1502	MEPLLSGSKRKITCSDCQNSEKKWLNGLTGRILLSIRRNTSHWP
Y71F9B.6	Y71F9B.6	261	3	74	200	no	2	7	1609	MEATMTQIFEFSKQKAFRRYLQRKRSFQTAQAPQPPSATMNQ
Y71F9B.6	Y71F9B.6	262	3	1433	1586	no	2	7	1609	MITRSLRSNRTSNRPKISSASRNPIFWLMSFQFARCSSSGFSQQLMRFNHM
Y71F9B.6	Y71F9B.6	263	3	491	731	no	2	7	1609	MQIDFTSAPRRMASLWQFSRISRRTATTWIRWRRFSPTQPSIRRNSDRNRFLEARIACGIRLTYQQKSCGHLSSETLKIK
ZK1151.1	ZK1151.1g	265	1	13359	13575	no	2	52	13282	MYPHPFPPKKLSSFSRPTVARPHHVILGYCSWDYWALSTQKKTDFSRHRYPHLSFCEYHHFRFFPFSMPFLF
ZK1151.1	ZK1151.1g	266	2	13315	13606	no	2	52	13282	MFLNDFTFFFLNFLICTPTPFPPKNYPVFPGLQLRAPITSSWVTVAGITGLFPPKKKLIFLDTGTPISLFVNIIISDFSPSQCLFCFNCIRLISNMK
ZK1151.1	ZK1151.1g	267	3	3905	4052	no	2	52	13282	MKPRFSTRNSDSTLMELLESTDPVSSRNSVVLSHSRRMDHRLLLRSLSS
ZK1151.1	ZK1151.1g	268	3	1808	2228	no	2	52	13282	MLMNALRDKLKSRRRTLMSIASFFACSRVNTNNSVTCLPEECSIWTPSSLLSVLLNSSSFGFPRENPLRSPETGVISSSWIFRCSPTTTSSCSTRWNSVRSSTMMCTIKERLFSIRDIQRFVSSKSISDKCKVNGIGFLR
ZK1151.1	ZK1151.1g	269	3	4754	4874	no	2	52	13282	MMLEFRWTRFTRRGDELKMTTCNFFVSVRILFRSKIVFMQ
ZK1151.1	ZK1151.1g	270	3	968	1109	no	2	52	13282	MNGVSGWFELSSSSTIVTSRELLRSSSTSFNDSERMIYRREKSRSDG
ZK1151.1	ZK1151.1g	271	3	5960	6230	no	2	52	13282	MQFLMMLRRLRRKSLQKIHQRLEVLKNLLENLEHDFSVKPVSSRLVEIRSTSSTRKPRHSLNQKPLCSDILRSRRISCRQDSQFQLRKKE
ZK1151.1	ZK1151.1g	272	3	3485	3626	no	2	52	13282	MSIFHNNKPSLTNSTGMLHFSVNTSREPVLTRDTILTLTPSKTRCKS
ZK1151.1	ZK1151.1g	273	3	3074	3251	no	2	52	13282	MMLSESQSPDRRKILNESFMLTRDLRMLFKPWTVTWPMSRSSSVNFRIQHQPSVSIMTA
ZK1151.1	ZK1151.1g	274	3	7286	7511	no	2	52	13282	MRRRRHLEIRMHRLKIDTRIFSTRQWIVNGSCWMQWILRNVFKKLRFHWIPGFKALINDFRLLQKYLLLLKRLRR
ZK1151.1	ZK1151.1g	275	3	2258	2549	no	2	52	13282	MRSTSSPLWRRLPTLKPGSRSNPSGLRTTTIGRTSRWKKENDSCGSSTRSRRFSTSIIKCSWLSPSDVQASHHSGREENVSRIRSRLPHSVTIPMRM
ZK1151.1	ZK1151.1g	276	3	6737	6872	no	2	52	13282	MRLTSFTRMPIRLSVLLKQSPRMKPSKEPRHSFWTRSKSLKKFDN
ZK1151.1	ZK1151.1g	277	3	11366	11513	no	2	52	13282	MIWNLGLMMSWRDIRKLSMSLYLRILMELEHLLMKNPEDLLKEKRRKME
ZK1151.1	ZK1151.1g	278	3	6419	6644	no	2	52	13282	MLRKAKKLLERSTLWSQKLRIWIQSGEVAMSFKSRRRKSSSWQEIWVRLRQRCWSSELNGKLLSEPESLLSQCLR
ZK1151.1	ZK1151.1g	279	3	2870	3041	no	2	52	13282	MMLTNCSASSIQMIHWRCVFAKSSEEPTSTSGTCSMRVKSLQSQIGLLSTIRRWPSC
ZK1151.1	ZK1151.1g	280	3	9110	9362	no	2	52	13282	MKEYLRIRVFLNRGLQRIDPLLRVFVISRMPMMLSSRRLQNFLRQLQKVMLLLGMLRTSSIDSRSYGRKLNEKLLIGEFFWRMF
ZK1151.1	ZK1151.1g	281	3	8504	8651	no	2	52	13282	MKKPVLIRFSSEMLLEKRRRLLGSWEWKEMRRMRRSQTQLTRERSWLKK
ZK1151.1	ZK1151.1g	282	3	10367	10493	no	2	52	13282	MLEEKSRNGRDGWKKLNLLCFPLNQREDYRRLLNSSSTNSRP
ZK1151.1	ZK1151.1g	283	3	8015	8294	no	2	52	13282	MRRLHFLPRRFHYRKDSMKDLILSCKFWRIWIVICKLLMKRIPRHRLNSFSFSKKIFLKKCAHPWTSLLLFPTSFKFCALLIRLMSFRPTRLP
ZK1151.1	ZK1151.1g	284	3	8834	8996	no	2	52	13282	MKSWHEWWLLIDRLSKDSSLMSDLFTRFLPKIRLRFWNQLLENLCKDMKKFGRR
ZK1151.1	ZK1151.1g	285	3	12806	12950	no	2	52	13282	MIHVVPRDVLTSTCSQKLVRFMRLTRCDLSPRIDTASSFRPPERLVRL
ZK1151.1	ZK1151.1g	286	3	12320	12533	no	2	52	13282	MWSGMITRRHVSMICSDESIDFTLEMCQDRCSSMELLDPIMFQTRRSSTPNSQLPDSKWPKLLIDLTRVME
ZK1151.1	ZK1151.1g	287	3	5507	5834	no	2	52	13282	MRSMDFKLSIRKVKLSPEPWILLEPRFDLLACQRLNRKLKLSKIRRTTLRGSPITCATFQMSPEPSQLSRRARISGNELIRVLRSLMLEWESSRSWNRWMQSLMVQRTS
ZK1151.1	ZK1151.1g	288	3	12539	12752	no	2	52	13282	MPRNSSMLSDLMLLIETPSHKRTLKRSRMRLSCRRRRAAAVPHTKLRRSLRITIGSETPISREWSASSDRL
ZK1151.1	ZK1151.1b	290	1	14961	15177	no	2	52	14884	MYPHPFPPKKLSSFSRPTVARPHHVILGYCSWDYWALSTQKKTDFSRHRYPHLSFCEYHHFRFFPFSMPFLF
ZK1151.1	ZK1151.1b	291	2	14917	15208	no	2	52	14884	MFLNDFTFFFLNFLICTPTPFPPKNYPVFPGLQLRAPITSSWVTVAGITGLFPPKKKLIFLDTGTPISLFVNIIISDFSPSQCLFCFNCIRLISNMK
ZK1151.1	ZK1151.1b	292	3	3905	4052	no	2	52	14884	MKPRFSTRNSDSTLMELLESTDPVSSRNSVVLSHSRRMDHRLLLRSLSS
ZK1151.1	ZK1151.1b	293	3	1808	2228	no	2	52	14884	MLMNALRDKLKSRRRTLMSIASFFACSRVNTNNSVTCLPEECSIWTPSSLLSVLLNSSSFGFPRENPLRSPETGVISSSWIFRCSPTTTSSCSTRWNSVRSSTMMCTIKERLFSIRDIQRFVSSKSISDKCKVNGIGFLR
ZK1151.1	ZK1151.1b	294	3	4754	4874	no	2	52	14884	MMLEFRWTRFTRRGDELKMTTCNFFVSVRILFRSKIVFMQ
ZK1151.1	ZK1151.1b	295	3	13001	13148	no	2	52	14884	MIWNLGLMMSWRDIRKLSMSLYLRILMELEHLLMKNPEDLLKEKRRKME
ZK1151.1	ZK1151.1b	296	3	9650	9929	no	2	52	14884	MRRLHFLPRRFHYRKDSMKDLILSCKFWRIWIVICKLLMKRIPRHRLNSFSFSKKIFLKKCAHPWTSLLLFPTSFKFCALLIRLMSFRPTRLP
ZK1151.1	ZK1151.1b	297	3	968	1109	no	2	52	14884	MNGVSGWFELSSSSTIVTSRELLRSSSTSFNDSERMIYRREKSRSDG
ZK1151.1	ZK1151.1b	298	3	5960	6230	no	2	52	14884	MQFLMMLRRLRRKSLQKIHQRLEVLKNLLENLEHDFSVKPVSSRLVEIRSTSSTRKPRHSLNQKPLCSDILRSRRISCRQDSQFQLRKKE
ZK1151.1	ZK1151.1b	299	3	3485	3626	no	2	52	14884	MSIFHNNKPSLTNSTGMLHFSVNTSREPVLTRDTILTLTPSKTRCKS
ZK1151.1	ZK1151.1b	300	3	3074	3251	no	2	52	14884	MMLSESQSPDRRKILNESFMLTRDLRMLFKPWTVTWPMSRSSSVNFRIQHQPSVSIMTA
ZK1151.1	ZK1151.1b	301	3	2258	2549	no	2	52	14884	MRSTSSPLWRRLPTLKPGSRSNPSGLRTTTIGRTSRWKKENDSCGSSTRSRRFSTSIIKCSWLSPSDVQASHHSGREENVSRIRSRLPHSVTIPMRM
ZK1151.1	ZK1151.1b	302	3	12002	12128	no	2	52	14884	MLEEKSRNGRDGWKKLNLLCFPLNQREDYRRLLNSSSTNSRP
ZK1151.1	ZK1151.1b	303	3	14408	14552	no	2	52	14884	MIHVVPRDVLTSTCSQKLVRFMRLTRCDLSPRIDTASSFRPPERLVRL
ZK1151.1	ZK1151.1b	304	3	10469	10631	no	2	52	14884	MKSWHEWWLLIDRLSKDSSLMSDLFTRFLPKIRLRFWNQLLENLCKDMKKFGRR
ZK1151.1	ZK1151.1b	305	3	2870	3041	no	2	52	14884	MMLTNCSASSIQMIHWRCVFAKSSEEPTSTSGTCSMRVKSLQSQIGLLSTIRRWPSC
ZK1151.1	ZK1151.1b	306	3	14141	14354	no	2	52	14884	MPRNSSMLSDLMLLIETPSHKRTLKRSRMRLSCRRRRAAAVPHTKLRRSLRITIGSETPISREWSASSDRL
ZK1151.1	ZK1151.1b	307	3	10139	10286	no	2	52	14884	MKKPVLIRFSSEMLLEKRRRLLGSWEWKEMRRMRRSQTQLTRERSWLKK
ZK1151.1	ZK1151.1b	308	3	8372	8507	no	2	52	14884	MRLTSFTRMPIRLSVLLKQSPRMKPSKEPRHSFWTRSKSLKKFDN
ZK1151.1	ZK1151.1b	309	3	10745	10997	no	2	52	14884	MKEYLRIRVFLNRGLQRIDPLLRVFVISRMPMMLSSRRLQNFLRQLQKVMLLLGMLRTSSIDSRSYGRKLNEKLLIGEFFWRMF
ZK1151.1	ZK1151.1b	310	3	13955	14135	no	2	52	14884	MWSGMITRRHVSMICSDESIDFTLEMCQDRCSSMELLDPNSQLPDSKWPKLLIDLTRVME
ZK1151.1	ZK1151.1b	311	3	5507	5834	no	2	52	14884	MRSMDFKLSIRKVKLSPEPWILLEPRFDLLACQRLNRKLKLSKIRRTTLRGSPITCATFQMSPEPSQLSRRARISGNELIRVLRSLMLEWESSRSWNRWMQSLMVQRTS
ZK1151.1	ZK1151.1b	312	3	8921	9146	no	2	52	14884	MRRRRHLEIRMHRLKIDTRIFSTRQWIVNGSCWMQWILRNVFKKLRFHWIPGFKALINDFRLLQKYLLLLKRLRR
ZK1151.1	ZK1151.1b	313	3	7826	8279	no	2	52	14884	MPREFRASSTKSMTFGLQTPVSSRTSVMRSKSTPPQKMLKQLILSSPSFKQESMGSSPRYRSKMCTWKKNESKQIVFSRKAKKLLERSTLWSQKLRIWIQSGEVAMSFKSRRRKSSSWQEIWVRLRQRCWSSELNGKLLSEPESLLSQCLR
ZK1151.1	ZK1151.1h	315	1	10680	10848	no	2	52	10324	MPTPILTFWSFLLNQYHFIVIFSMYNSIFFPPTTLCDYTNSLMKNDILNFFFFFDK
ZK1151.1	ZK1151.1h	316	3	1808	2228	no	2	52	10324	MLMNALRDKLKSRRRTLMSIASFFACSRVNTNNSVTCLPEECSIWTPSSLLSVLLNSSSFGFPRENPLRSPETGVISSSWIFRCSPTTTSSCSTRWNSVRSSTMMCTIKERLFSIRDIQRFVSSKSISDKCKVNGIGFLR
ZK1151.1	ZK1151.1h	317	3	6233	6434	no	2	52	10324	METTSPSPFRMLCVKDSLEINVTCTERSIYPWKRLLIADFLIQTVNGLCQTKVREMVQPLRRRPPKP
ZK1151.1	ZK1151.1h	318	3	968	1109	no	2	52	10324	MNGVSGWFELSSSSTIVTSRELLRSSSTSFNDSERMIYRREKSRSDG
ZK1151.1	ZK1151.1h	319	3	7277	7460	no	2	52	10324	MLQMPFTPLSRCKPVLLLPRRKLCHLDFHSLTTLSARPSPSDGMINLLEPSLIQKPRNNLP
ZK1151.1	ZK1151.1h	320	3	8666	8810	no	2	52	10324	MPLPERSVIQETIRPSHGSTFSSQSTKLLPVKESLIQPRDIMFQSPLL
ZK1151.1	ZK1151.1h	321	3	8828	8972	no	2	52	10324	MLPLETTETRLPEKMFHSVIQLIEDLSIVLPMKLSPSHSSPITDPTEN
ZK1151.1	ZK1151.1h	322	3	5942	6167	no	2	52	10324	MNFLLHQLESRMIEEHMSLTWFVLFPVESLIQSRESSSTRTPSTSCLPRKLTSKDSSPCVELSRSLDFSTFHQHS
ZK1151.1	ZK1151.1h	323	3	3074	3251	no	2	52	10324	MMLSESQSPDRRKILNESFMLTRDLRMLFKPWTVTWPMSRSSSVNFRIQHQPSVSIMTA
ZK1151.1	ZK1151.1h	324	3	2258	2549	no	2	52	10324	MRSTSSPLWRRLPTLKPGSRSNPSGLRTTTIGRTSRWKKENDSCGSSTRSRRFSTSIIKCSWLSPSDVQASHHSGREENVSRIRSRLPHSVTIPMRM
ZK1151.1	ZK1151.1h	325	3	7889	8099	no	2	52	10324	MEEAIPPASLRDLPRDTSSHLDPADQHLEIRADSSNNAFNSPLLPQTGERGGVVMDVMSSSISEEVSKFK
ZK1151.1	ZK1151.1h	326	3	5327	5471	no	2	52	10324	MMRRREFHLELLLSGMSLESKMESTPTLPVVRACLSRKLTKMGSSERR
ZK1151.1	ZK1151.1h	327	3	7496	7649	no	2	52	10324	MIPRSLIRRLEKRSHFSKLFVKRLSTITPELSRILKLDVFTTSLKLAILDS
ZK1151.1	ZK1151.1h	328	3	5588	5897	no	2	52	10324	MLKFVILWIQMRMMSSQSLKLWKEDFSFQTERLFLRRMRRSSQSQKLFMKDFSPNEFVTPSSTFVEFATPRPARISVLTKPSKPESSFRTPSVLSIFRLRSRF
ZK1151.1	ZK1151.1h	329	3	2870	3041	no	2	52	10324	MMLTNCSASSIQMIHWRCVFAKSSEEPTSTSGTCSMRVKSLQSQIGLLSTIRRWPSC
ZK1151.1	ZK1151.1h	330	3	5030	5156	no	2	52	10324	MLSRREWLIHRLEFSREGPLIWNFSFGLQSTTDTSQLRIQNM
ZK1151.1	ZK1151.1h	331	3	4520	4643	no	2	52	10324	MSGKSLTPSEIVLRSLKSRMRCRRSPRKPSPILSSTRWKAI
ZK1151.1	ZK1151.1h	332	3	3869	4016	no	2	52	10324	MKPRFSTRNSDSTLMELLESTDPVSSRNSVVLSHSRRMDHRLLLRSLSS
ZK1151.1	ZK1151.1h	333	3	9374	9530	no	2	52	10324	MQYVGELLMETRFFIFKPPVTSSLFVMLSTRTRSTPTESLSKEPTVSRSVTL
ZK1151.1	ZK1151.1h	334	3	4769	4979	yes	2	52	10324	MDLLSRIFRLCSTRLGEFITLKPDSQSLFLRLSALDSTILTSVNSVIFTLERFSLRVISCQRELPTGRLS
ZK1151.1	ZK1151.1h	335	3	6662	7040	no	2	52	10324	MERSLLQMSTEFSASLKELSSESLMLRRSKCQPVEDLFPSRKPWRKRSWSLMDQSTDATLNKLLKPRPLSSTPSHSFHTTTNPRTSSKSHLETDQSSASVKLDSLSSKNPLNLGSLTPSKEFSSIT
ZK1151.1	ZK1151.1h	336	3	4247	4487	no	2	52	10324	MPIGHVVWPKTLNEHVVRLKKPSGGDVRRRNVGGERLRIGRDGRMRRIGGDGRKRRDGGERKRRRGERSQTSTSKSKSPL
ZK1151.1	ZK1151.1e	338	1	10377	10545	no	2	52	10021	MPTPILTFWSFLLNQYHFIVIFSMYNSIFFPPTTLCDYTNSLMKNDILNFFFFFDK
ZK1151.1	ZK1151.1e	339	3	5930	6131	no	2	52	10021	METTSPSPFRMLCVKDSLEINVTCTERSIYPWKRLLIADFLIQTVNGLCQTKVREMVQPLRRRPPKP
ZK1151.1	ZK1151.1e	340	3	4217	4340	no	2	52	10021	MSGKSLTPSEIVLRSLKSRMRCRRSPRKPSPILSSTRWKAI
ZK1151.1	ZK1151.1e	341	3	7586	7796	no	2	52	10021	MEEAIPPASLRDLPRDTSSHLDPADQHLEIRADSSNNAFNSPLLPQTGERGGVVMDVMSSSISEEVSKFK
ZK1151.1	ZK1151.1e	342	3	4727	4853	no	2	52	10021	MLSRREWLIHRLEFSREGPLIWNFSFGLQSTTDTSQLRIQNM
ZK1151.1	ZK1151.1e	343	3	3146	3287	no	2	52	10021	MSIFHNNKPSLTNSTGMLHFSVNTSREPVLTRDTILTLTPSKTRCKS
ZK1151.1	ZK1151.1e	344	3	3566	3713	no	2	52	10021	MKPRFSTRNSDSTLMELLESTDPVSSRNSVVLSHSRRMDHRLLLRSLSS
ZK1151.1	ZK1151.1e	345	3	5639	5864	no	2	52	10021	MNFLLHQLESRMIEEHMSLTWFVLFPVESLIQSRESSSTRTPSTSCLPRKLTSKDSSPCVELSRSLDFSTFHQHS
ZK1151.1	ZK1151.1e	346	3	1919	2210	no	2	52	10021	MRSTSSPLWRRLPTLKPGSRSNPSGLRTTTIGRTSRWKKENDSCGSSTRSRRFSTSIIKCSWLSPSDVQASHHSGREENVSRIRSRLPHSVTIPMRM
ZK1151.1	ZK1151.1e	347	3	2735	2912	no	2	52	10021	MMLSESQSPDRRKILNESFMLTRDLRMLFKPWTVTWPMSRSSSVNFRIQHQPSVSIMTA
ZK1151.1	ZK1151.1e	348	3	6974	7157	no	2	52	10021	MLQMPFTPLSRCKPVLLLPRRKLCHLDFHSLTTLSARPSPSDGMINLLEPSLIQKPRNNLP
ZK1151.1	ZK1151.1e	349	3	7193	7346	no	2	52	10021	MIPRSLIRRLEKRSHFSKLFVKRLSTITPELSRILKLDVFTTSLKLAILDS
ZK1151.1	ZK1151.1e	350	3	1469	1889	no	2	52	10021	MLMNALRDKLKSRRRTLMSIASFFACSRVNTNNSVTCLPEECSIWTPSSLLSVLLNSSSFGFPRENPLRSPETGVISSSWIFRCSPTTTSSCSTRWNSVRSSTMMCTIKERLFSIRDIQRFVSSKSISDKCKVNGIGFLR
ZK1151.1	ZK1151.1e	351	3	8525	8669	no	2	52	10021	MLPLETTETRLPEKMFHSVIQLIEDLSIVLPMKLSPSHSSPITDPTEN
ZK1151.1	ZK1151.1e	352	3	8363	8507	no	2	52	10021	MPLPERSVIQETIRPSHGSTFSSQSTKLLPVKESLIQPRDIMFQSPLL
ZK1151.1	ZK1151.1e	353	3	5285	5594	no	2	52	10021	MLKFVILWIQMRMMSSQSLKLWKEDFSFQTERLFLRRMRRSSQSQKLFMKDFSPNEFVTPSSTFVEFATPRPARISVLTKPSKPESSFRTPSVLSIFRLRSRF
ZK1151.1	ZK1151.1e	354	3	2531	2702	no	2	52	10021	MMLTNCSASSIQMIHWRCVFAKSSEEPTSTSGTCSMRVKSLQSQIGLLSTIRRWPSC
ZK1151.1	ZK1151.1e	355	3	3944	4184	no	2	52	10021	MPIGHVVWPKTLNEHVVRLKKPSGGDVRRRNVGGERLRIGRDGRMRRIGGDGRKRRDGGERKRRRGERSQTSTSKSKSPL
ZK1151.1	ZK1151.1e	356	3	6359	6737	no	2	52	10021	MERSLLQMSTEFSASLKELSSESLMLRRSKCQPVEDLFPSRKPWRKRSWSLMDQSTDATLNKLLKPRPLSSTPSHSFHTTTNPRTSSKSHLETDQSSASVKLDSLSSKNPLNLGSLTPSKEFSSIT
ZK1151.1	ZK1151.1e	357	3	4466	4676	yes	2	52	10021	MDLLSRIFRLCSTRLGEFITLKPDSQSLFLRLSALDSTILTSVNSVIFTLERFSLRVISCQRELPTGRLS
ZK1151.1	ZK1151.1e	358	3	5024	5168	no	2	52	10021	MMRRREFHLELLLSGMSLESKMESTPTLPVVRACLSRKLTKMGSSERR
ZK1151.1	ZK1151.1e	359	3	9071	9227	no	2	52	10021	MQYVGELLMETRFFIFKPPVTSSLFVMLSTRTRSTPTESLSKEPTVSRSVTL
ZK1151.1	ZK1151.1a	361	1	10716	10884	no	2	52	10360	MPTPILTFWSFLLNQYHFIVIFSMYNSIFFPPTTLCDYTNSLMKNDILNFFFFFDK
ZK1151.1	ZK1151.1a	362	3	3905	4052	no	2	52	10360	MKPRFSTRNSDSTLMELLESTDPVSSRNSVVLSHSRRMDHRLLLRSLSS
ZK1151.1	ZK1151.1a	363	3	9410	9566	no	2	52	10360	MQYVGELLMETRFFIFKPPVTSSLFVMLSTRTRSTPTESLSKEPTVSRSVTL
ZK1151.1	ZK1151.1a	364	3	7925	8135	no	2	52	10360	MEEAIPPASLRDLPRDTSSHLDPADQHLEIRADSSNNAFNSPLLPQTGERGGVVMDVMSSSISEEVSKFK
ZK1151.1	ZK1151.1a	365	3	1808	2228	no	2	52	10360	MLMNALRDKLKSRRRTLMSIASFFACSRVNTNNSVTCLPEECSIWTPSSLLSVLLNSSSFGFPRENPLRSPETGVISSSWIFRCSPTTTSSCSTRWNSVRSSTMMCTIKERLFSIRDIQRFVSSKSISDKCKVNGIGFLR
ZK1151.1	ZK1151.1a	366	3	968	1109	no	2	52	10360	MNGVSGWFELSSSSTIVTSRELLRSSSTSFNDSERMIYRREKSRSDG
ZK1151.1	ZK1151.1a	367	3	3485	3626	no	2	52	10360	MSIFHNNKPSLTNSTGMLHFSVNTSREPVLTRDTILTLTPSKTRCKS
ZK1151.1	ZK1151.1a	368	3	3074	3251	no	2	52	10360	MMLSESQSPDRRKILNESFMLTRDLRMLFKPWTVTWPMSRSSSVNFRIQHQPSVSIMTA
ZK1151.1	ZK1151.1a	369	3	2258	2549	no	2	52	10360	MRSTSSPLWRRLPTLKPGSRSNPSGLRTTTIGRTSRWKKENDSCGSSTRSRRFSTSIIKCSWLSPSDVQASHHSGREENVSRIRSRLPHSVTIPMRM
ZK1151.1	ZK1151.1a	370	3	5066	5192	no	2	52	10360	MLSRREWLIHRLEFSREGPLIWNFSFGLQSTTDTSQLRIQNM
ZK1151.1	ZK1151.1a	371	3	6698	7076	no	2	52	10360	MERSLLQMSTEFSASLKELSSESLMLRRSKCQPVEDLFPSRKPWRKRSWSLMDQSTDATLNKLLKPRPLSSTPSHSFHTTTNPRTSSKSHLETDQSSASVKLDSLSSKNPLNLGSLTPSKEFSSIT
ZK1151.1	ZK1151.1a	372	3	4556	4679	no	2	52	10360	MSGKSLTPSEIVLRSLKSRMRCRRSPRKPSPILSSTRWKAI
ZK1151.1	ZK1151.1a	373	3	2870	3041	no	2	52	10360	MMLTNCSASSIQMIHWRCVFAKSSEEPTSTSGTCSMRVKSLQSQIGLLSTIRRWPSC
ZK1151.1	ZK1151.1a	374	3	7532	7685	no	2	52	10360	MIPRSLIRRLEKRSHFSKLFVKRLSTITPELSRILKLDVFTTSLKLAILDS
ZK1151.1	ZK1151.1a	375	3	5363	5507	no	2	52	10360	MMRRREFHLELLLSGMSLESKMESTPTLPVVRACLSRKLTKMGSSERR
ZK1151.1	ZK1151.1a	376	3	5978	6203	no	2	52	10360	MNFLLHQLESRMIEEHMSLTWFVLFPVESLIQSRESSSTRTPSTSCLPRKLTSKDSSPCVELSRSLDFSTFHQHS
ZK1151.1	ZK1151.1a	377	3	5624	5933	no	2	52	10360	MLKFVILWIQMRMMSSQSLKLWKEDFSFQTERLFLRRMRRSSQSQKLFMKDFSPNEFVTPSSTFVEFATPRPARISVLTKPSKPESSFRTPSVLSIFRLRSRF
ZK1151.1	ZK1151.1a	378	3	8702	8846	no	2	52	10360	MPLPERSVIQETIRPSHGSTFSSQSTKLLPVKESLIQPRDIMFQSPLL
ZK1151.1	ZK1151.1a	379	3	4805	5015	yes	2	52	10360	MDLLSRIFRLCSTRLGEFITLKPDSQSLFLRLSALDSTILTSVNSVIFTLERFSLRVISCQRELPTGRLS
ZK1151.1	ZK1151.1a	380	3	4283	4523	no	2	52	10360	MPIGHVVWPKTLNEHVVRLKKPSGGDVRRRNVGGERLRIGRDGRMRRIGGDGRKRRDGGERKRRRGERSQTSTSKSKSPL
ZK1151.1	ZK1151.1a	381	3	8864	9008	no	2	52	10360	MLPLETTETRLPEKMFHSVIQLIEDLSIVLPMKLSPSHSSPITDPTEN
ZK1151.1	ZK1151.1a	382	3	7313	7496	no	2	52	10360	MLQMPFTPLSRCKPVLLLPRRKLCHLDFHSLTTLSARPSPSDGMINLLEPSLIQKPRNNLP
ZK1151.1	ZK1151.1a	383	3	6269	6470	no	2	52	10360	METTSPSPFRMLCVKDSLEINVTCTERSIYPWKRLLIADFLIQTVNGLCQTKVREMVQPLRRRPPKP
ZK1151.1	ZK1151.1f	385	1	10374	10542	no	2	52	10018	MPTPILTFWSFLLNQYHFIVIFSMYNSIFFPPTTLCDYTNSLMKNDILNFFFFFDK
ZK1151.1	ZK1151.1f	386	3	3905	4052	no	2	52	10018	MKPRFSTRNSDSTLMELLESTDPVSSRNSVVLSHSRRMDHRLLLRSLSS
ZK1151.1	ZK1151.1f	387	3	1808	2228	no	2	52	10018	MLMNALRDKLKSRRRTLMSIASFFACSRVNTNNSVTCLPEECSIWTPSSLLSVLLNSSSFGFPRENPLRSPETGVISSSWIFRCSPTTTSSCSTRWNSVRSSTMMCTIKERLFSIRDIQRFVSSKSISDKCKVNGIGFLR
ZK1151.1	ZK1151.1f	388	3	8360	8504	no	2	52	10018	MPLPERSVIQETIRPSHGSTFSSQSTKLLPVKESLIQPRDIMFQSPLL
ZK1151.1	ZK1151.1f	389	3	968	1109	no	2	52	10018	MNGVSGWFELSSSSTIVTSRELLRSSSTSFNDSERMIYRREKSRSDG
ZK1151.1	ZK1151.1f	390	3	7190	7343	no	2	52	10018	MIPRSLIRRLEKRSHFSKLFVKRLSTITPELSRILKLDVFTTSLKLAILDS
ZK1151.1	ZK1151.1f	391	3	3485	3626	no	2	52	10018	MSIFHNNKPSLTNSTGMLHFSVNTSREPVLTRDTILTLTPSKTRCKS
ZK1151.1	ZK1151.1f	392	3	3074	3251	no	2	52	10018	MMLSESQSPDRRKILNESFMLTRDLRMLFKPWTVTWPMSRSSSVNFRIQHQPSVSIMTA
ZK1151.1	ZK1151.1f	393	3	2258	2549	no	2	52	10018	MRSTSSPLWRRLPTLKPGSRSNPSGLRTTTIGRTSRWKKENDSCGSSTRSRRFSTSIIKCSWLSPSDVQASHHSGREENVSRIRSRLPHSVTIPMRM
ZK1151.1	ZK1151.1f	394	3	6971	7154	no	2	52	10018	MLQMPFTPLSRCKPVLLLPRRKLCHLDFHSLTTLSARPSPSDGMINLLEPSLIQKPRNNLP
ZK1151.1	ZK1151.1f	395	3	7583	7793	no	2	52	10018	MEEAIPPASLRDLPRDTSSHLDPADQHLEIRADSSNNAFNSPLLPQTGERGGVVMDVMSSSISEEVSKFK
ZK1151.1	ZK1151.1f	396	3	4724	4850	no	2	52	10018	MLSRREWLIHRLEFSREGPLIWNFSFGLQSTTDTSQLRIQNM
ZK1151.1	ZK1151.1f	397	3	5927	6128	no	2	52	10018	METTSPSPFRMLCVKDSLEINVTCTERSIYPWKRLLIADFLIQTVNGLCQTKVREMVQPLRRRPPKP
ZK1151.1	ZK1151.1f	398	3	5021	5165	no	2	52	10018	MMRRREFHLELLLSGMSLESKMESTPTLPVVRACLSRKLTKMGSSERR
ZK1151.1	ZK1151.1f	399	3	4463	4673	yes	2	52	10018	MDLLSRIFRLCSTRLGEFITLKPDSQSLFLRLSALDSTILTSVNSVIFTLERFSLRVISCQRELPTGRLS
ZK1151.1	ZK1151.1f	400	3	2870	3041	no	2	52	10018	MMLTNCSASSIQMIHWRCVFAKSSEEPTSTSGTCSMRVKSLQSQIGLLSTIRRWPSC
ZK1151.1	ZK1151.1f	401	3	4214	4337	no	2	52	10018	MSGKSLTPSEIVLRSLKSRMRCRRSPRKPSPILSSTRWKAI
ZK1151.1	ZK1151.1f	402	3	9068	9224	no	2	52	10018	MQYVGELLMETRFFIFKPPVTSSLFVMLSTRTRSTPTESLSKEPTVSRSVTL
ZK1151.1	ZK1151.1f	403	3	6356	6734	no	2	52	10018	MERSLLQMSTEFSASLKELSSESLMLRRSKCQPVEDLFPSRKPWRKRSWSLMDQSTDATLNKLLKPRPLSSTPSHSFHTTTNPRTSSKSHLETDQSSASVKLDSLSSKNPLNLGSLTPSKEFSSIT
ZK1151.1	ZK1151.1f	404	3	5636	5861	no	2	52	10018	MNFLLHQLESRMIEEHMSLTWFVLFPVESLIQSRESSSTRTPSTSCLPRKLTSKDSSPCVELSRSLDFSTFHQHS
ZK1151.1	ZK1151.1f	405	3	8522	8666	no	2	52	10018	MLPLETTETRLPEKMFHSVIQLIEDLSIVLPMKLSPSHSSPITDPTEN
ZK1151.1	ZK1151.1f	406	3	5282	5591	no	2	52	10018	MLKFVILWIQMRMMSSQSLKLWKEDFSFQTERLFLRRMRRSSQSQKLFMKDFSPNEFVTPSSTFVEFATPRPARISVLTKPSKPESSFRTPSVLSIFRLRSRF
ZK1151.1	ZK1151.1c	408	1	14994	15210	no	2	52	14917	MYPHPFPPKKLSSFSRPTVARPHHVILGYCSWDYWALSTQKKTDFSRHRYPHLSFCEYHHFRFFPFSMPFLF
ZK1151.1	ZK1151.1c	409	2	14950	15241	no	2	52	14917	MFLNDFTFFFLNFLICTPTPFPPKNYPVFPGLQLRAPITSSWVTVAGITGLFPPKKKLIFLDTGTPISLFVNIIISDFSPSQCLFCFNCIRLISNMK
ZK1151.1	ZK1151.1c	410	3	3905	4052	no	2	52	14917	MKPRFSTRNSDSTLMELLESTDPVSSRNSVVLSHSRRMDHRLLLRSLSS
ZK1151.1	ZK1151.1c	411	3	1808	2228	no	2	52	14917	MLMNALRDKLKSRRRTLMSIASFFACSRVNTNNSVTCLPEECSIWTPSSLLSVLLNSSSFGFPRENPLRSPETGVISSSWIFRCSPTTTSSCSTRWNSVRSSTMMCTIKERLFSIRDIQRFVSSKSISDKCKVNGIGFLR
ZK1151.1	ZK1151.1c	412	3	4754	4874	no	2	52	14917	MMLEFRWTRFTRRGDELKMTTCNFFVSVRILFRSKIVFMQ
ZK1151.1	ZK1151.1c	413	3	13001	13148	no	2	52	14917	MIWNLGLMMSWRDIRKLSMSLYLRILMELEHLLMKNPEDLLKEKRRKME
ZK1151.1	ZK1151.1c	414	3	9650	9929	no	2	52	14917	MRRLHFLPRRFHYRKDSMKDLILSCKFWRIWIVICKLLMKRIPRHRLNSFSFSKKIFLKKCAHPWTSLLLFPTSFKFCALLIRLMSFRPTRLP
ZK1151.1	ZK1151.1c	415	3	968	1109	no	2	52	14917	MNGVSGWFELSSSSTIVTSRELLRSSSTSFNDSERMIYRREKSRSDG
ZK1151.1	ZK1151.1c	416	3	5960	6230	no	2	52	14917	MQFLMMLRRLRRKSLQKIHQRLEVLKNLLENLEHDFSVKPVSSRLVEIRSTSSTRKPRHSLNQKPLCSDILRSRRISCRQDSQFQLRKKE
ZK1151.1	ZK1151.1c	417	3	3485	3626	no	2	52	14917	MSIFHNNKPSLTNSTGMLHFSVNTSREPVLTRDTILTLTPSKTRCKS
ZK1151.1	ZK1151.1c	418	3	3074	3251	no	2	52	14917	MMLSESQSPDRRKILNESFMLTRDLRMLFKPWTVTWPMSRSSSVNFRIQHQPSVSIMTA
ZK1151.1	ZK1151.1c	419	3	2258	2549	no	2	52	14917	MRSTSSPLWRRLPTLKPGSRSNPSGLRTTTIGRTSRWKKENDSCGSSTRSRRFSTSIIKCSWLSPSDVQASHHSGREENVSRIRSRLPHSVTIPMRM
ZK1151.1	ZK1151.1c	420	3	12002	12128	no	2	52	14917	MLEEKSRNGRDGWKKLNLLCFPLNQREDYRRLLNSSSTNSRP
ZK1151.1	ZK1151.1c	421	3	10469	10631	no	2	52	14917	MKSWHEWWLLIDRLSKDSSLMSDLFTRFLPKIRLRFWNQLLENLCKDMKKFGRR
ZK1151.1	ZK1151.1c	422	3	2870	3041	no	2	52	14917	MMLTNCSASSIQMIHWRCVFAKSSEEPTSTSGTCSMRVKSLQSQIGLLSTIRRWPSC
ZK1151.1	ZK1151.1c	423	3	10139	10286	no	2	52	14917	MKKPVLIRFSSEMLLEKRRRLLGSWEWKEMRRMRRSQTQLTRERSWLKK
ZK1151.1	ZK1151.1c	424	3	8372	8507	no	2	52	14917	MRLTSFTRMPIRLSVLLKQSPRMKPSKEPRHSFWTRSKSLKKFDN
ZK1151.1	ZK1151.1c	425	3	10745	10997	no	2	52	14917	MKEYLRIRVFLNRGLQRIDPLLRVFVISRMPMMLSSRRLQNFLRQLQKVMLLLGMLRTSSIDSRSYGRKLNEKLLIGEFFWRMF
ZK1151.1	ZK1151.1c	426	3	14174	14387	no	2	52	14917	MPRNSSMLSDLMLLIETPSHKRTLKRSRMRLSCRRRRAAAVPHTKLRRSLRITIGSETPISREWSASSDRL
ZK1151.1	ZK1151.1c	427	3	14441	14585	no	2	52	14917	MIHVVPRDVLTSTCSQKLVRFMRLTRCDLSPRIDTASSFRPPERLVRL
ZK1151.1	ZK1151.1c	428	3	5507	5834	no	2	52	14917	MRSMDFKLSIRKVKLSPEPWILLEPRFDLLACQRLNRKLKLSKIRRTTLRGSPITCATFQMSPEPSQLSRRARISGNELIRVLRSLMLEWESSRSWNRWMQSLMVQRTS
ZK1151.1	ZK1151.1c	429	3	8921	9146	no	2	52	14917	MRRRRHLEIRMHRLKIDTRIFSTRQWIVNGSCWMQWILRNVFKKLRFHWIPGFKALINDFRLLQKYLLLLKRLRR
ZK1151.1	ZK1151.1c	430	3	7826	8279	no	2	52	14917	MPREFRASSTKSMTFGLQTPVSSRTSVMRSKSTPPQKMLKQLILSSPSFKQESMGSSPRYRSKMCTWKKNESKQIVFSRKAKKLLERSTLWSQKLRIWIQSGEVAMSFKSRRRKSSSWQEIWVRLRQRCWSSELNGKLLSEPESLLSQCLR
ZK1151.1	ZK1151.1c	431	3	13955	14168	no	2	52	14917	MWSGMITRRHVSMICSDESIDFTLEMCQDRCSSMELLDPIMFQTRRSSTPNSQLPDSKWPKLLIDLTRVME
ZK1151.1	ZK1151.1d	433	2	6124	6325	no	1	0	10215	METTSPSPFRMLCVKDSLEINVTCTERSIYPWKRLLIADFLIQTVNGLCQTKVREMVQPLRRRPPKP
ZK1151.1	ZK1151.1d	434	2	2113	2404	no	1	0	10215	MRSTSSPLWRRLPTLKPGSRSNPSGLRTTTIGRTSRWKKENDSCGSSTRSRRFSTSIIKCSWLSPSDVQASHHSGREENVSRIRSRLPHSVTIPMRM
ZK1151.1	ZK1151.1d	435	2	823	964	no	1	0	10215	MNGVSGWFELSSSSTIVTSRELLRSSSTSFNDSERMIYRREKSRSDG
ZK1151.1	ZK1151.1d	436	2	2725	2896	no	1	0	10215	MMLTNCSASSIQMIHWRCVFAKSSEEPTSTSGTCSMRVKSLQSQIGLLSTIRRWPSC
ZK1151.1	ZK1151.1d	437	2	4921	5047	no	1	0	10215	MLSRREWLIHRLEFSREGPLIWNFSFGLQSTTDTSQLRIQNM
ZK1151.1	ZK1151.1d	438	2	7780	7990	no	1	0	10215	MEEAIPPASLRDLPRDTSSHLDPADQHLEIRADSSNNAFNSPLLPQTGERGGVVMDVMSSSISEEVSKFK
ZK1151.1	ZK1151.1d	439	2	8719	8863	no	1	0	10215	MLPLETTETRLPEKMFHSVIQLIEDLSIVLPMKLSPSHSSPITDPTEN
ZK1151.1	ZK1151.1d	440	2	4411	4534	no	1	0	10215	MSGKSLTPSEIVLRSLKSRMRCRRSPRKPSPILSSTRWKAI
ZK1151.1	ZK1151.1d	441	2	7168	7351	no	1	0	10215	MLQMPFTPLSRCKPVLLLPRRKLCHLDFHSLTTLSARPSPSDGMINLLEPSLIQKPRNNLP
ZK1151.1	ZK1151.1d	442	2	5218	5362	no	1	0	10215	MMRRREFHLELLLSGMSLESKMESTPTLPVVRACLSRKLTKMGSSERR
ZK1151.1	ZK1151.1d	443	2	4660	4870	yes	1	0	10215	MDLLSRIFRLCSTRLGEFITLKPDSQSLFLRLSALDSTILTSVNSVIFTLERFSLRVISCQRELPTGRLS
ZK1151.1	ZK1151.1d	444	2	7387	7540	no	1	0	10215	MIPRSLIRRLEKRSHFSKLFVKRLSTITPELSRILKLDVFTTSLKLAILDS
ZK1151.1	ZK1151.1d	445	2	1663	2083	no	1	0	10215	MLMNALRDKLKSRRRTLMSIASFFACSRVNTNNSVTCLPEECSIWTPSSLLSVLLNSSSFGFPRENPLRSPETGVISSSWIFRCSPTTTSSCSTRWNSVRSSTMMCTIKERLFSIRDIQRFVSSKSISDKCKVNGIGFLR
ZK1151.1	ZK1151.1d	446	2	4138	4378	no	1	0	10215	MPIGHVVWPKTLNEHVVRLKKPSGGDVRRRNVGGERLRIGRDGRMRRIGGDGRKRRDGGERKRRRGERSQTSTSKSKSPL
ZK1151.1	ZK1151.1d	447	2	9265	9421	no	1	0	10215	MQYVGELLMETRFFIFKPPVTSSLFVMLSTRTRSTPTESLSKEPTVSRSVTL
ZK1151.1	ZK1151.1d	448	2	3760	3907	no	1	0	10215	MKPRFSTRNSDSTLMELLESTDPVSSRNSVVLSHSRRMDHRLLLRSLSS
ZK1151.1	ZK1151.1d	449	2	6553	6931	no	1	0	10215	MERSLLQMSTEFSASLKELSSESLMLRRSKCQPVEDLFPSRKPWRKRSWSLMDQSTDATLNKLLKPRPLSSTPSHSFHTTTNPRTSSKSHLETDQSSASVKLDSLSSKNPLNLGSLTPSKEFSSIT
ZK1151.1	ZK1151.1d	450	2	5833	6058	no	1	0	10215	MNFLLHQLESRMIEEHMSLTWFVLFPVESLIQSRESSSTRTPSTSCLPRKLTSKDSSPCVELSRSLDFSTFHQHS
ZK1151.1	ZK1151.1d	451	2	5479	5788	no	1	0	10215	MLKFVILWIQMRMMSSQSLKLWKEDFSFQTERLFLRRMRRSSQSQKLFMKDFSPNEFVTPSSTFVEFATPRPARISVLTKPSKPESSFRTPSVLSIFRLRSRF
ZK1151.1	ZK1151.1d	452	2	2929	3106	no	1	0	10215	MMLSESQSPDRRKILNESFMLTRDLRMLFKPWTVTWPMSRSSSVNFRIQHQPSVSIMTA
ZK1151.1	ZK1151.1d	453	2	8557	8701	no	1	0	10215	MPLPERSVIQETIRPSHGSTFSSQSTKLLPVKESLIQPRDIMFQSPLL
ZK1151.1	ZK1151.1d	454	2	3340	3481	no	1	0	10215	MSIFHNNKPSLTNSTGMLHFSVNTSREPVLTRDTILTLTPSKTRCKS
ZK1151.1	ZK1151.1d	455	3	10571	10739	no	1	0	10215	MPTPILTFWSFLLNQYHFIVIFSMYNSIFFPPTTLCDYTNSLMKNDILNFFFFFDK
ZK1151.1	ZK1151.1i	457	1	2589	2880	no	3	0	4493	MRSTSSPLWRRLPTLKPGSRSNPSGLRTTTIGRTSRWKKENDSCGSSTRSRRFSTSIIKCSWLSPSDVQASHHSGREENVSRIRSRLPHSVTIPMRM
ZK1151.1	ZK1151.1i	458	1	4200	4347	no	3	0	4493	MKPRFSTRNSDSTLMELLESTDPVSSRNSVVLSHSRRMDHRLLLRSLSS
ZK1151.1	ZK1151.1i	459	1	2139	2559	no	3	0	4493	MLMNALRDKLKSRRRTLMSIASFFACSRVNTNNSVTCLPEECSIWTPSSLLSVLLNSSSFGFPRENPLRSPETGVISSSWIFRCSPTTTSSCSTRWNSVRSSTMMCTIKERLFSIRDIQRFVSSKSISDKCKVNGIGFLR
ZK1151.1	ZK1151.1i	460	1	3405	3582	no	3	0	4493	MMLSESQSPDRRKILNESFMLTRDLRMLFKPWTVTWPMSRSSSVNFRIQHQPSVSIMTA
ZK1151.1	ZK1151.1i	461	1	3201	3372	no	3	0	4493	MMLTNCSASSIQMIHWRCVFAKSSEEPTSTSGTCSMRVKSLQSQIGLLSTIRRWPSC
ZK1151.1	ZK1151.1i	462	1	1299	1440	no	3	0	4493	MNGVSGWFELSSSSTIVTSRELLRSSSTSFNDSERMIYRREKSRSDG
ZK1151.1	ZK1151.1i	463	1	657	840	no	3	0	4493	MRSTRAEMEPPAGMDMLEMVVDKSFIMHTISTCPMLSRHTVDSRRARATRPASTLSERCNE
F55A3.3	F55A3.3.1	465	3	1463	1589	no	2	7	3097	MSSQKLVFQSKAVGPMRKSRRNRMCHIKPKRDSHKMQTFRRC
F55A3.3	F55A3.3.1	466	3	398	521	no	2	7	3097	MLEISSKRNSARNSSVRGIRRSRKAVSIRMTSLSRLLICSQ
F55A3.3	F55A3.3.1	467	3	2216	2633	no	2	7	3097	MFNSTQKSEKSLRILESIIICKIVMICRVNSKNVKCVVVSMLHLIVSARRCLVSQMINLNSILRSLDSDSLEFRIVRLPHSNQLHRALLISPNGLHSSSHSPKLNLSTLNVSLFNSRISIWSSSSKITRSNLRWSPKSR
F55A3.3	F55A3.3.1	468	3	2738	3155	no	2	7	3097	MILKHSLKKVDGVSLMLNLIMKRQWMILMIRMLMILKKKMHLLDQEVKVMKMKVKVKRLNPMMMMKDRWIPMNQKEKIGQIWRKKQRMLIRDVKSKNLHVIVIVRDHIRASLDHRTNAESKSCLYNFLRFILLFCFSTI
F55A3.3	F55A3.3.2	470	2	1465	1591	no	1	9	3099	MSSQKLVFQSKAVGPMRKSRRNRMCHIKPKRDSHKMQTFRRC
F55A3.3	F55A3.3.2	471	2	400	523	no	1	9	3099	MLEISSKRNSARNSSVRGIRRSRKAVSIRMTSLSRLLICSQ
F55A3.3	F55A3.3.2	472	2	2740	3157	no	1	9	3099	MILKHSLKKVDGVSLMLNLIMKRQWMILMIRMLMILKKKMHLLDQEVKVMKMKVKVKRLNPMMMMKDRWIPMNQKEKIGQIWRKKQRMLIRDVKSKNLHVIVIVRDHIRASLDHRTNAESKSCLYNFLRFILLFCFSTI
F55A3.3	F55A3.3.2	473	2	2218	2635	no	1	9	3099	MFNSTQKSEKSLRILESIIICKIVMICRVNSKNVKCVVVSMLHLIVSARRCLVSQMINLNSILRSLDSDSLEFRIVRLPHSNQLHRALLISPNGLHSSSHSPKLNLSTLNVSLFNSRISIWSSSSKITRSNLRWSPKSR
E03H4.4	E03H4.4	475	2	580	742	no	1	0	2415	MEWMECGHEDSLWSILRNTQMEIVVRYSATRWKELLFSKDLSNTTLMLMLFIDC
E03H4.4	E03H4.4	476	3	1802	1991	no	1	0	2415	MAACRLLESTSPYRISKYLQYVFYRYIWRTSCQKNISHCEGLNRLKSFGNVEKVRRWFEKVRI
M04F3.3	M04F3.3	478	1	1215	1341	no	3	65	1382	MIIRSRRMQKSRTRCLVSRNSQEVVELIVEMQKLHNRNSDPK
M04F3.3	M04F3.3	479	1	999	1143	no	3	65	1382	MLPESMLWLLNWEKLLAQRSYPAWMMNPPFRSIFWRHSGEPEFLVAII
C50F2.5	C50F2.5	481	1	756	912	no	3	50	1154	MLWSKLKTWLFSFVRSRSLRWTFCVKVWKTLCHQSCFNHSMALIVHPLVGLL
C50F2.5	C50F2.5	482	1	276	417	no	3	50	1154	MFVCRSRLEIIGAFFADPMRSSSQDSTSEWKELSTSLCRRRPRKAQS
C04F1.3	C04F1.3	486	2	1198	1360	no	1	0	1356	MFRLFLPQLLQTSHHHLKHWDHLEHPYFLIFHLNMLHSLQHHTIYHHRRRVENX
C04F1.3	C04F1.3	487	2	412	571	no	1	0	1356	MCSISTALRVLPVKNDYKLEKSFRSKITAYTVDQTAGDLTIQIHQLQFQIIQN
C04F1.3	C04F1.3	488	2	703	880	no	1	0	1356	MESEPHFSVIITVVLVAQRVVVEKRKRISKRHVSGLCSTKISSKFFETAIRLILDLMQL
T26E3.2	T26E3.2	492	2	709	871	yes	1	0	1095	MGSEPRCSCTSRSRTRRTCWKRNSHSQRWNLGSSTSLRWLYPSVIGICSKKVPM
T26E3.2	T26E3.2	493	3	905	1136	no	1	0	1095	MPPKTNGIPGARSLNKGLLRAQAIRFKSHHSESAVSLDIRRITGDTTAISHGSEAIPAVTSYALMLLVFLNKHLKNX
F56G4.4	F56G4.4	496	2	928	1231	no	1	0	1410	MRRDAERQKKTKMFQMKKVMKMKRNLRLLEHQNVKPWCSASTHQLRLPRSSKSSLKSPQKSQKLGSLSPQNHQFQQHLEHHLEHGNVSKKVKKRRKYSNLH
F56G4.4	F56G4.4	497	2	466	748	no	1	0	1410	MQQVQLSRSISPLVICLKLKYNVLKFNGFEQKIPRLLQAIIIGIYSIIRHVGQLRLIFIRSNSMSKNVQNLKSRERKIIMEWMKFRLFEVEKPT
C54G4.2	C54G4.2	501	2	1096	1348	no	1	0	1269	MIDVARCSRFKSSVKSTKNVSAQRWIRQEEVHERAHGSLFLVKDHENLLLAKLLVRMRKRSNNERALYDFLGIIQFNTNGLTCQ
C54G4.2	C54G4.2	502	2	742	883	yes	1	0	1269	MESNGLGWSRIIQQGKWMMGLLRRAETNSTHMTRWLRCKIDLRSSSE
H27M09.5	H27M09.5	507	1	708	849	no	3	0	1025	MIIQNHIILFHQHLLQRKNPQKRFHEIIWLIHCLRGIRNQQKSQRKS
H27M09.5	H27M09.5	508	1	402	561	no	3	0	1025	MYRLIKWRNLQVDVILEEEVIEIEIEMENPEEVVIGMKREDVKIHISQPDQCL
F46F11.9	F46F11.9b	510	3	779	968	no	2	22	3868	MEHPINNHPRLQPHQLPQYLQLCQLLEVFHRIVIQTVQLCGNRAKNSHRWQTRRPFRQFFQSF
F46F11.9	F46F11.9b	511	3	518	677	no	2	22	3868	MRKLLVTISFFMTQEVRAAVQREEMSFWLKCVQHMEMIIVKCCNLIQIVKVLK
F46F11.9	F46F11.9b	512	3	3800	4076	no	2	22	3868	MMLLFLRFRVCYRSSNRHHIQLSEVSQIIYTHFPHLPVIFYSRIAFFNGFSPFLNFPLIFASKIAHLSCKIYVLFLFQYFSFSSIRIYSFFL
F46F11.9	F46F11.9b	513	3	2714	2873	no	2	22	3868	MQKLQRSDLKKGLQAPQTHFSRLARRKEYFSMFEALTNLLAQQLLQNNQIQLS
F46F11.9	F46F11.9a	515	3	3794	4070	no	2	22	3862	MMLLFLRFRVCYRSSNRHHIQLSEVSQIIYTHFPHLPVIFYSRIAFFNGFSPFLNFPLIFASKIAHLSCKIYVLFLFQYFSFSSIRIYSFFL
F46F11.9	F46F11.9a	516	3	779	968	no	2	22	3862	MEHPINNHPRLQPHQLPQYLQLCQLLEVFHRIVIQTVQLCGNRAKNSHRWQTRRPFRQFFQSF
F46F11.9	F46F11.9a	517	3	518	677	no	2	22	3862	MRKLLVTISFFMTQEVRAAVQREEMSFWLKCVQHMEMIIVKCCNLIQIVKVLK
F46F11.9	F46F11.9a	518	3	2708	2867	no	2	22	3862	MQKLQRSDLKKGLQAPQTHFSRLARRKEYFSMFEALTNLLAQQLLQNNQIQLS
Y54E5A.7	Y54E5A.7d	520	2	310	448	no	3	20	254	MYLCVLGWCLRTFQSRTQTPHLTRKFYKTVYISFFCKFGFPMEHPN
Y54E5A.7	Y54E5A.7b	522	2	865	1054	no	1	0	1185	MSIINVKENQQNGPVEHLLGKYQAHQVYECSLNYVTYSPVGRVFISIIRLMTRKWLEFISSGK
Y54E5A.7	Y54E5A.7b	523	3	1241	1379	no	1	0	1185	MYLCVLGWCLRTFQSRTQTPHLTRKFYKTVYISFFCKFGFPMEHPN
Y54E5A.7	Y54E5A.7c	525	2	94	283	no	1	0	414	MSIINVKENQQNGPVEHLLGKYQAHQVYECSLNYVTYSPVGRVFISIIRLMTRKWLEFISSGK
Y54E5A.7	Y54E5A.7c	526	3	470	608	no	1	0	414	MYLCVLGWCLRTFQSRTQTPHLTRKFYKTVYISFFCKFGFPMEHPN
Y54E5A.7	Y54E5A.7a	528	1	360	675	no	3	104	1970	MLSFNNASESIISKFEFSKAIPVVWVSVLARKTVILTECPAGIPDVLAITVMTVTSSWQVVSDKRMVQNLGRVTSSGVELTRFIIMCSLRRTGNTWELLIRRRRH
Y54E5A.7	Y54E5A.7a	529	1	1650	1839	no	3	104	1970	MSIINVKENQQNGPVEHLLGKYQAHQVYECSLNYVTYSPVGRVFISIIRLMTRKWLEFISSGK
Y54E5A.7	Y54E5A.7a	530	2	2026	2164	no	3	104	1970	MYLCVLGWCLRTFQSRTQTPHLTRKFYKTVYISFFCKFGFPMEHPN
F57C9.7	F57C9.7	532	2	142	313	no	1	0	1236	MALTTRVFQKMNTTMITVAAATRRVMMNTLWRLTRVRWWMLQKVPKASDRMNALSEN
F57C9.7	F57C9.7	533	2	814	988	no	1	0	1236	MLQSPFMDTVDLQFKINIQDLLTRTTSNIRTNYYGRNHLPISSSSNPHSMLTSLPSSS
F57C9.7	F57C9.7	534	3	1172	1358	no	1	0	1236	MRRGNHKGGRRLRLSDGRRRILKEFLSESHYCFNYSLFVSNFRASSCCLRISNLKFIYIVRI
Y106G6D.6	Y106G6D.6	536	1	168	300	no	3	554	944	MMKGNKHLLKLYKHLQSEKVIFGPSILETFNDLEEAALPRSDKF
C34G6.2	C34G6.2	538	2	1462	1591	no	1	18	2271	MNGVRPVVVFVNPNIDWLMIALIVIPNAVAGPAPVNAPKINSG
C34G6.2	C34G6.2	539	2	370	517	no	1	18	2271	MMNEIDFTQHSVLSKIMVNTKELEEFTHKCLLPEELILDQHSFRGIVNL
C34G6.2	C34G6.2	540	2	142	280	no	1	18	2271	MMEQGRHQRKRKLHYHQEWQREWQLSLLQLLQISTSAWIYPACVLI
C34G6.2	C34G6.2	541	2	862	1087	no	1	18	2271	MEMFTFLLEEICSTLQLLQMILHFSFIMHLLILYGKNGDWQDNQELIGKLHSLLIINYVLLHNILEHLQCSRSVQ
C34G6.2	C34G6.2	542	2	1099	1267	no	1	18	2271	MVYPINIQITCIVMHHGQHVKLEAIAVLNSFSVTLPPGPPVVYLVFVQDLNVVNSV
C34G6.2	C34G6.2	543	2	1843	2341	yes	1	18	2271	MDHASTTIDHVPDGLVSVNVRKIHGWLRIVDQAVTVAILNQSFVECVELQLDQLLQLHKFVRLIHLVNHHVEVGDVTISEIMEDGVEMEVVDGETMIHGEDQDGVVEEVDGVEVDGEAVDGVNDPFEQPMHQFQCHLLIRTSCNFCYLFSIYPIIFVYNKYLPQTQ
C34G6.2	C34G6.2	544	3	1250	1397	no	1	18	2271	MWSIPCESMFLRNLPKRCMCSLINSSTSNTCSNNSNTSKSSTISRIMFQ
W10C8.5	W10C8.5.1	546	1	990	1158	no	2	64	1261	MADILPNKPRINSSCIRPHCSSKARRPQGLHRDLREAQSPSARNPRRTLGICWRSL
W10C8.5	W10C8.5.1	547	3	101	278	no	2	64	1261	MSLECSLPLEPDPLSTLSLHSNFKPNPKSTLPRSRRSRRPTPSSMVQKEPSASRCSRSI
W10C8.5	W10C8.5.3	549	2	82	259	no	1	45	1242	MSLECSLPLEPDPLSTLSLHSNFKPNPKSTLPRSRRSRRPTPSSMVQKEPSASRCSRSI
W10C8.5	W10C8.5.3	550	3	971	1139	no	1	45	1242	MADILPNKPRINSSCIRPHCSSKARRPQGLHRDLREAQSPSARNPRRTLGICWRSL
W10C8.5	W10C8.5.2	552	1	99	276	no	3	62	1259	MSLECSLPLEPDPLSTLSLHSNFKPNPKSTLPRSRRSRRPTPSSMVQKEPSASRCSRSI
W10C8.5	W10C8.5.2	553	2	988	1156	no	3	62	1259	MADILPNKPRINSSCIRPHCSSKARRPQGLHRDLREAQSPSARNPRRTLGICWRSL
F36H2.3	F36H2.3a	555	2	451	580	no	1	0	4170	MHTHSTTLANLYLDMKKSSSHYALLGDKLLQLYSSIQQMTVFA
F36H2.3	F36H2.3a	556	2	1705	1825	no	1	0	4170	MDKSRIIKEIHLIQLVLHSPQPLSHVTVDIPEMEITFPRV
F36H2.3	F36H2.3a	557	2	1411	1573	no	1	0	4170	MVFGHQVLVNALMLLPLVKQPATVKRFQHELMEQSRIVHSEPTLLGLLQHWRVI
F36H2.3	F36H2.3a	558	2	2998	3136	no	1	0	4170	MEEQWGLSQVEQLSQDHAQTVVQSQEHQLPLAPMECGIQHSWVHVL
F36H2.3	F36H2.3a	559	2	2551	2671	no	1	0	4170	MDKLRIVREILLMQLDQHSPPPLLLVTVDTPSVELLFPHV
F36H2.3	F36H2.3a	560	2	805	1030	no	1	0	4170	MLPPHHHLVVFRHQPPMEILSTLPMWPLQPLSILYQLQHELQYFVHWDTCQQHQLHHQNVLMENGNHLFPRVYLF
F36H2.3	F36H2.3a	561	2	4015	4204	no	1	0	4170	MEALLPAKRHLFPPEPWSHFNVTMVIRFREIMPRRRAPMEFSLKLQPRVLKIELPVFKFCNND
F36H2.3	F36H2.3a	562	3	1133	1364	no	1	0	4170	MRSKLFWNRKSYFNMHFHRMGSKNRTMRTGRNSKTFRKCINRSRMCCNCKSSKWKSSLYAIKSNCSIFIRNLCLFDV
F36H2.3	F36H2.3a	563	3	3461	3689	no	1	0	4170	MLKWNSNWAVNMPCRPMDSCNNCNLFWIQHCSRFPMYWCNCSNKRSSDIQRRKYGTSFSRNYCNIDMFKLGDTDWK
F36H2.3	F36H2.3a	564	3	3716	4079	no	1	0	4170	MDTYIGKLYIFWNWNWAMLYTSINASWCNIDLFFRILCTMDCRKYCYNVMSCRSDSYRNFYILLYKFCLVTCIGIMLWIVCWSSFNHHYNMLIPSNCSTIWKHCYQPNGTFFRRNHGHTSM
F36H2.3	F36H2.3a	565	3	2951	3164	no	1	0	4170	MYCDDCSTRWLCDLLKWRNNGAFPKWNNCHRIMHKRWCNHRSINCHLLQWNVESNILGYMFSNRGFNNWPM
F36H2.3	F36H2.3b	567	2	451	580	no	1	0	4194	MHTHSTTLANLYLDMKKSSSHYALLGDKLLQLYSSIQQMTVFA
F36H2.3	F36H2.3b	568	2	1729	1849	no	1	0	4194	MDKSRIIKEIHLIQLVLHSPQPLSHVTVDIPEMEITFPRV
F36H2.3	F36H2.3b	569	2	1435	1597	no	1	0	4194	MVFGHQVLVNALMLLPLVKQPATVKRFQHELMEQSRIVHSEPTLLGLLQHWRVI
F36H2.3	F36H2.3b	570	2	2575	2695	no	1	0	4194	MDKLRIVREILLMQLDQHSPPPLLLVTVDTPSVELLFPHV
F36H2.3	F36H2.3b	571	2	3022	3160	no	1	0	4194	MEEQWGLSQVEQLSQDHAQTVVQSQEHQLPLAPMECGIQHSWVHVL
F36H2.3	F36H2.3b	572	2	805	1030	no	1	0	4194	MLPPHHHLVVFRHQPPMEILSTLPMWPLQPLSILYQLQHELQYFVHWDTCQQHQLHHQNVLMENGNHLFPRVYLF
F36H2.3	F36H2.3b	573	2	4039	4228	no	1	0	4194	MEALLPAKRHLFPPEPWSHFNVTMVIRFREIMPRRRAPMEFSLKLQPRVLKIELPVFKFCNND
F36H2.3	F36H2.3b	574	3	3740	4103	no	1	0	4194	MDTYIGKLYIFWNWNWAMLYTSINASWCNIDLFFRILCTMDCRKYCYNVMSCRSDSYRNFYILLYKFCLVTCIGIMLWIVCWSSFNHHYNMLIPSNCSTIWKHCYQPNGTFFRRNHGHTSM
F36H2.3	F36H2.3b	575	3	1133	1388	no	1	0	4194	MRSKLFWNRKSYFNMHFHRMGSKNRTMRTGRNSKTFRKSQIPNSTPGINRSRMCCNCKSSKWKSSLYAIKSNCSIFIRNLCLFDV
F36H2.3	F36H2.3b	576	3	3485	3713	no	1	0	4194	MLKWNSNWAVNMPCRPMDSCNNCNLFWIQHCSRFPMYWCNCSNKRSSDIQRRKYGTSFSRNYCNIDMFKLGDTDWK
F36H2.3	F36H2.3b	577	3	2975	3188	no	1	0	4194	MYCDDCSTRWLCDLLKWRNNGAFPKWNNCHRIMHKRWCNHRSINCHLLQWNVESNILGYMFSNRGFNNWPM
F36H2.3	F36H2.3f	579	2	451	580	no	1	0	3771	MHTHSTTLANLYLDMKKSSSHYALLGDKLLQLYSSIQQMTVFA
F36H2.3	F36H2.3f	580	2	1729	1849	no	1	0	3771	MDKSRIIKEIHLIQLVLHSPQPLSHVTVDIPEMEITFPRV
F36H2.3	F36H2.3f	581	2	1435	1597	no	1	0	3771	MVFGHQVLVNALMLLPLVKQPATVKRFQHELMEQSRIVHSEPTLLGLLQHWRVI
F36H2.3	F36H2.3f	582	2	2152	2272	no	1	0	3771	MDKLRIVREILLMQLDQHSPPPLLLVTVDTPSVELLFPHV
F36H2.3	F36H2.3f	583	2	3616	3805	no	1	0	3771	MEALLPAKRHLFPPEPWSHFNVTMVIRFREIMPRRRAPMEFSLKLQPRVLKIELPVFKFCNND
F36H2.3	F36H2.3f	584	2	805	1030	no	1	0	3771	MLPPHHHLVVFRHQPPMEILSTLPMWPLQPLSILYQLQHELQYFVHWDTCQQHQLHHQNVLMENGNHLFPRVYLF
F36H2.3	F36H2.3f	585	2	2599	2737	no	1	0	3771	MEEQWGLSQVEQLSQDHAQTVVQSQEHQLPLAPMECGIQHSWVHVL
F36H2.3	F36H2.3f	586	3	1133	1388	no	1	0	3771	MRSKLFWNRKSYFNMHFHRMGSKNRTMRTGRNSKTFRKSQIPNSTPGINRSRMCCNCKSSKWKSSLYAIKSNCSIFIRNLCLFDV
F36H2.3	F36H2.3f	587	3	3317	3680	no	1	0	3771	MDTYIGKLYIFWNWNWAMLYTSINASWCNIDLFFRILCTMDCRKYCYNVMSCRSDSYRNFYILLYKFCLVTCIGIMLWIVCWSSFNHHYNMLIPSNCSTIWKHCYQPNGTFFRRNHGHTSM
F36H2.3	F36H2.3f	588	3	2552	2765	no	1	0	3771	MYCDDCSTRWLCDLLKWRNNGAFPKWNNCHRIMHKRWCNHRSINCHLLQWNVESNILGYMFSNRGFNNWPM
F36H2.3	F36H2.3f	589	3	3062	3290	no	1	0	3771	MLKWNSNWAVNMPCRPMDSCNNCNLFWIQHCSRFPMYWCNCSNKRSSDIQRRKYGTSFSRNYCNIDMFKLGDTDWK
F36H2.3	F36H2.3c	591	2	451	580	no	1	0	3564	MHTHSTTLANLYLDMKKSSSHYALLGDKLLQLYSSIQQMTVFA
F36H2.3	F36H2.3c	592	2	1435	1597	no	1	0	3564	MVFGHQVLVNALMLLPLVKQPATVKRFQHELMEQSRIVHSEPTLLGLLQHWRVI
F36H2.3	F36H2.3c	593	2	3409	3598	no	1	0	3564	MEALLPAKRHLFPPEPWSHFNVTMVIRFREIMPRRRAPMEFSLKLQPRVLKIELPVFKFCNND
F36H2.3	F36H2.3c	594	2	805	1030	no	1	0	3564	MLPPHHHLVVFRHQPPMEILSTLPMWPLQPLSILYQLQHELQYFVHWDTCQQHQLHHQNVLMENGNHLFPRVYLF
F36H2.3	F36H2.3c	595	2	2392	2530	no	1	0	3564	MEEQWGLSQVEQLSQDHAQTVVQSQEHQLPLAPMECGIQHSWVHVL
F36H2.3	F36H2.3c	596	3	1133	1388	no	1	0	3564	MRSKLFWNRKSYFNMHFHRMGSKNRTMRTGRNSKTFRKSQIPNSTPGINRSRMCCNCKSSKWKSSLYAIKSNCSIFIRNLCLFDV
F36H2.3	F36H2.3c	597	3	2855	3083	no	1	0	3564	MLKWNSNWAVNMPCRPMDSCNNCNLFWIQHCSRFPMYWCNCSNKRSSDIQRRKYGTSFSRNYCNIDMFKLGDTDWK
F36H2.3	F36H2.3c	598	3	3110	3473	no	1	0	3564	MDTYIGKLYIFWNWNWAMLYTSINASWCNIDLFFRILCTMDCRKYCYNVMSCRSDSYRNFYILLYKFCLVTCIGIMLWIVCWSSFNHHYNMLIPSNCSTIWKHCYQPNGTFFRRNHGHTSM
F36H2.3	F36H2.3c	599	3	2345	2558	no	1	0	3564	MYCDDCSTRWLCDLLKWRNNGAFPKWNNCHRIMHKRWCNHRSINCHLLQWNVESNILGYMFSNRGFNNWPM
F36H2.3	F36H2.3d	601	2	2389	2527	no	1	0	3561	MEEQWGLSQVEQLSQDHAQTVVQSQEHQLPLAPMECGIQHSWVHVL
F36H2.3	F36H2.3d	602	2	451	580	no	1	0	3561	MHTHSTTLANLYLDMKKSSSHYALLGDKLLQLYSSIQQMTVFA
F36H2.3	F36H2.3d	603	2	3406	3595	no	1	0	3561	MEALLPAKRHLFPPEPWSHFNVTMVIRFREIMPRRRAPMEFSLKLQPRVLKIELPVFKFCNND
F36H2.3	F36H2.3d	604	2	1435	1597	no	1	0	3561	MVFGHQVLVNALMLLPLVKQPATVKRFQHELMEQSRIVHSEPTLLGLLQHWRVI
F36H2.3	F36H2.3d	605	2	1942	2062	no	1	0	3561	MDKLRIVREILLMQLDQHSPPPLLLVTVDTPSVELLFPHV
F36H2.3	F36H2.3d	606	2	805	1030	no	1	0	3561	MLPPHHHLVVFRHQPPMEILSTLPMWPLQPLSILYQLQHELQYFVHWDTCQQHQLHHQNVLMENGNHLFPRVYLF
F36H2.3	F36H2.3d	607	3	1133	1388	no	1	0	3561	MRSKLFWNRKSYFNMHFHRMGSKNRTMRTGRNSKTFRKSQIPNSTPGINRSRMCCNCKSSKWKSSLYAIKSNCSIFIRNLCLFDV
F36H2.3	F36H2.3d	608	3	2342	2555	no	1	0	3561	MYCDDCSTRWLCDLLKWRNNGAFPKWNNCHRIMHKRWCNHRSINCHLLQWNVESNILGYMFSNRGFNNWPM
F36H2.3	F36H2.3d	609	3	3107	3470	no	1	0	3561	MDTYIGKLYIFWNWNWAMLYTSINASWCNIDLFFRILCTMDCRKYCYNVMSCRSDSYRNFYILLYKFCLVTCIGIMLWIVCWSSFNHHYNMLIPSNCSTIWKHCYQPNGTFFRRNHGHTSM
F36H2.3	F36H2.3d	610	3	2852	3080	no	1	0	3561	MLKWNSNWAVNMPCRPMDSCNNCNLFWIQHCSRFPMYWCNCSNKRSSDIQRRKYGTSFSRNYCNIDMFKLGDTDWK
F36H2.3	F36H2.3e	612	2	451	580	no	1	0	3138	MHTHSTTLANLYLDMKKSSSHYALLGDKLLQLYSSIQQMTVFA
F36H2.3	F36H2.3e	613	2	1435	1597	no	1	0	3138	MVFGHQVLVNALMLLPLVKQPATVKRFQHELMEQSRIVHSEPTLLGLLQHWRVI
F36H2.3	F36H2.3e	614	2	2983	3172	no	1	0	3138	MEALLPAKRHLFPPEPWSHFNVTMVIRFREIMPRRRAPMEFSLKLQPRVLKIELPVFKFCNND
F36H2.3	F36H2.3e	615	2	805	1030	no	1	0	3138	MLPPHHHLVVFRHQPPMEILSTLPMWPLQPLSILYQLQHELQYFVHWDTCQQHQLHHQNVLMENGNHLFPRVYLF
F36H2.3	F36H2.3e	616	2	1966	2104	no	1	0	3138	MEEQWGLSQVEQLSQDHAQTVVQSQEHQLPLAPMECGIQHSWVHVL
F36H2.3	F36H2.3e	617	3	1133	1388	no	1	0	3138	MRSKLFWNRKSYFNMHFHRMGSKNRTMRTGRNSKTFRKSQIPNSTPGINRSRMCCNCKSSKWKSSLYAIKSNCSIFIRNLCLFDV
F36H2.3	F36H2.3e	618	3	2684	3047	no	1	0	3138	MDTYIGKLYIFWNWNWAMLYTSINASWCNIDLFFRILCTMDCRKYCYNVMSCRSDSYRNFYILLYKFCLVTCIGIMLWIVCWSSFNHHYNMLIPSNCSTIWKHCYQPNGTFFRRNHGHTSM
F36H2.3	F36H2.3e	619	3	2429	2657	no	1	0	3138	MLKWNSNWAVNMPCRPMDSCNNCNLFWIQHCSRFPMYWCNCSNKRSSDIQRRKYGTSFSRNYCNIDMFKLGDTDWK
F36H2.3	F36H2.3e	620	3	1919	2132	no	1	0	3138	MYCDDCSTRWLCDLLKWRNNGAFPKWNNCHRIMHKRWCNHRSINCHLLQWNVESNILGYMFSNRGFNNWPM
F36H2.3	F36H2.3g	622	2	451	580	no	1	0	3771	MHTHSTTLANLYLDMKKSSSHYALLGDKLLQLYSSIQQMTVFA
F36H2.3	F36H2.3g	623	2	1729	1849	no	1	0	3771	MDKSRIIKEIHLIQLVLHSPQPLSHVTVDIPEMEITFPRV
F36H2.3	F36H2.3g	624	2	1435	1597	no	1	0	3771	MVFGHQVLVNALMLLPLVKQPATVKRFQHELMEQSRIVHSEPTLLGLLQHWRVI
F36H2.3	F36H2.3g	625	2	3616	3805	no	1	0	3771	MEALLPAKRHLFPPEPWSHFNVTMVIRFREIMPRRRAPMEFSLKLQPRVLKIELPVFKFCNND
F36H2.3	F36H2.3g	626	2	805	1030	no	1	0	3771	MLPPHHHLVVFRHQPPMEILSTLPMWPLQPLSILYQLQHELQYFVHWDTCQQHQLHHQNVLMENGNHLFPRVYLF
F36H2.3	F36H2.3g	627	2	2599	2737	no	1	0	3771	MEEQWGLSQVEQLSQDHAQTVVQSQEHQLPLAPMECGIQHSWVHVL
F36H2.3	F36H2.3g	628	3	1133	1388	no	1	0	3771	MRSKLFWNRKSYFNMHFHRMGSKNRTMRTGRNSKTFRKSQIPNSTPGINRSRMCCNCKSSKWKSSLYAIKSNCSIFIRNLCLFDV
F36H2.3	F36H2.3g	629	3	3317	3680	no	1	0	3771	MDTYIGKLYIFWNWNWAMLYTSINASWCNIDLFFRILCTMDCRKYCYNVMSCRSDSYRNFYILLYKFCLVTCIGIMLWIVCWSSFNHHYNMLIPSNCSTIWKHCYQPNGTFFRRNHGHTSM
F36H2.3	F36H2.3g	630	3	2552	2765	no	1	0	3771	MYCDDCSTRWLCDLLKWRNNGAFPKWNNCHRIMHKRWCNHRSINCHLLQWNVESNILGYMFSNRGFNNWPM
F36H2.3	F36H2.3g	631	3	3062	3290	no	1	0	3771	MLKWNSNWAVNMPCRPMDSCNNCNLFWIQHCSRFPMYWCNCSNKRSSDIQRRKYGTSFSRNYCNIDMFKLGDTDWK
C04F12.9	C04F12.9	633	2	364	505	no	1	24	441	MFKRSSIVERLSSSSMSADIAIECTFEYPSPLFFPHLSFLNKSNKDE
Y71F9AL.9	Y71F9AL.9.1	635	3	86	206	no	2	4	946	MTSLWFFTHSILTLARQFLLSWKMEPLAFLEDGPHQMESV
Y71F9AL.9	Y71F9AL.9.1	636	3	1106	1394	no	2	4	946	MTLFIMLVIIIHYNLFRFFPFPPWFRLIFLFFPSSPTFFIFLSCTPLKFIHTHTYIYITQEALFVLCGRHQNFLFLFPFYVFSLFFFFSNKTTMGV
Y71F9AL.9	Y71F9AL.9.2	638	2	88	208	no	1	6	948	MTSLWFFTHSILTLARQFLLSWKMEPLAFLEDGPHQMESV
Y71F9AL.9	Y71F9AL.9.2	639	2	1108	1396	no	1	6	948	MTLFIMLVIIIHYNLFRFFPFPPWFRLIFLFFPSSPTFFIFLSCTPLKFIHTHTYIYITQEALFVLCGRHQNFLFLFPFYVFSLFFFFSNKTTMGV
C01H6.2	C01H6.2	641	3	1484	1649	no	2	130	2134	MNVITKLKQSGSIWRNAKVLLSFVFLISMENEKITKLQFPITTIKLKIMQNVMHI
T28B8.3	T28B8.3b	643	2	892	1054	no	1	0	1317	MILKNFCSVQFMIARSRFERRLRNVFYYLFIAHIFNFRIKKLINSRIFFNQKRN
T28B8.3	T28B8.3b	644	2	94	217	no	1	0	1317	MNFSWHSASLVFNQIVGAMDRFQNEPAISPGLNSNWHLQIL
T28B8.3	T28B8.3a	646	2	2062	2266	no	1	0	5637	MKCEHRKLLLCPYCFIVHYPDRALLRIEQLFWTMNTFSLRLLKFFSIVRIRPFLSVELLEYQLYCTTC
T28B8.3	T28B8.3a	647	2	4414	4537	no	1	0	5637	MNFSWHSASLVFNQIVGAMDRFQNEPAISPGLNSNWHLQIL
T28B8.3	T28B8.3a	648	2	5212	5374	no	1	0	5637	MILKNFCSVQFMIARSRFERRLRNVFYYLFIAHIFNFRIKKLINSRIFFNQKRN
T28B8.3	T28B8.3a	649	2	421	541	no	1	0	5637	MIVNIPCFILLGFMIHQSIRQYGKQFFRKFQLEIKIKLNC
F13G3.11	F13G3.11.2	652	2	811	961	no	3	0	617	MKLRCSSKSFSDFKLDDFVSMWWSLSTNRCNTNFASRSLKKTLIKNSLYF
F13G3.11	F13G3.11.1	654	3	809	959	no	1	0	615	MKLRCSSKSFSDFKLDDFVSMWWSLSTNRCNTNFASRSLKKTLIKNSLYF
T23B3.4	T23B3.4	656	3	11	188	no	1	0	1263	MFSDNQSLYNYDIVNISTMSYTFTTWKCNCDPHNPRKITSIQKHHKFLSSQLGICRSSS
F12B6.3	F12B6.3	658	2	1153	1372	no	1	0	1407	MVWIRRIWRRKLRSIGSWRMPGRNGDCWILEQMLIGSRLLFFHFRSVQCGLLDILPSRRADIHLDLILIFFFL
F12B6.3	F12B6.3	659	2	49	172	no	1	0	1407	MKAHLLKNAQNRGSHRLRFWMLLWQIIQDLCQEIQLVSKSR
F12B6.3	F12B6.3	660	3	71	305	no	1	0	1407	MHKTEAHTGCDFGCYYGKLFKISARKSSWCPSRGNSTRCDGAQCAQQQFHGGHMVQFDLVRSTSRLFTFGQLSAKFII
C01F4.2	C01F4.2a	663	2	520	667	no	1	3	2961	MLMRMQVEKEAMISYKFEEVHRDDGLIRILRAVFAIHEIRRISTIRMTR
C01F4.2	C01F4.2a	664	2	2260	2404	no	1	3	2961	MNPTRAFFCLHSLLHLKKIHLPVIIVMVIILILEDKARWLESSLQMEK
C01F4.2	C01F4.2a	665	2	2626	2770	no	1	3	2961	MILVEILSSARMSSHLEQSLSLKQLVKDQLQCPLRVDLQVLLILRRLL
C01F4.2	C01F4.2a	666	2	1729	2059	no	1	3	2961	MTIWWRTQRHTTSQLCSKSISEICRKVYCQGNIIQRILEQQNSTLTRESKRFVCSLLSSSLQFLTLSSYFSSFFTKSHAIHRIGMMKMENCCQVTRWMLVTWPPSSLHQS
C01F4.2	C01F4.2a	667	3	1331	1472	no	1	3	2961	MVISFYSKSVSNINFKSIISISYHGLSTTHGLYTSLCQFTLRGANNM
C01F4.2	C01F4.2a	668	3	794	1148	yes	1	3	2961	MEILIAEASMEVETKICIFTCKFNIFINRFCMEIIGQYDMAIGRWCRSGVTWCSTRKPIRNRTICSSTPRRSTSHKNASRCQLGQTKSSPTKTSKTREKQSNADGSGCSTKGLRDTDA
C01F4.2	C01F4.2b	670	2	520	667	no	1	3	1869	MLMRMQVEKEAMISYKFEEVHRDDGLIRILRAVFAIHEIRRISTIRMTR
C01F4.2	C01F4.2b	671	2	1729	2068	no	1	3	1869	MTIWWRTQRHTTSQLCSKSISEICRKVYCQGNIIQRILEQQVGFRSFDYDNNILFQNSTLTRESKRFVCSLLSSSLQFLTLSSYFSSFFTKSHAIHRIGMMKMENWYVFIYLY
C01F4.2	C01F4.2b	672	3	1331	1472	no	1	3	1869	MVISFYSKSVSNINFKSIISISYHGLSTTHGLYTSLCQFTLRGANNM
C01F4.2	C01F4.2b	673	3	2081	2264	no	1	3	1869	MVKFQLSGNKMDARNLATIFAPSILRVDHDKLHETLAENEHQVIIVETMISNVEEIFKVCL
C01F4.2	C01F4.2b	674	3	794	1148	yes	1	3	1869	MEILIAEASMEVETKICIFTCKFNIFINRFCMEIIGQYDMAIGRWCRSGVTWCSTRKPIRNRTICSSTPRRSTSHKNASRCQLGQTKSSPTKTSKTREKQSNADGSGCSTKGLRDTDA
T03F1.3	T03F1.3.1	678	1	489	675	no	3	11	1262	MSMMLSEPLTEPIAPWLESSTHNVQVDSCSRTSSPTLARPSTTQLVHSWPSLEELRSLTRFS
T03F1.3	T03F1.3.1	679	1	933	1071	no	3	11	1262	MATWDLMLGRNLLRSSPLPFNAPKRLSGTVQQEYSSLINSPQAPSH
T03F1.3	T03F1.3.1	680	1	282	447	no	3	11	1262	MFSSSTTVSDQKWRLHAPIQLLDQSFSLKIFVIIWKRRAKESMHPVPRLRLIQQP
T03F1.3	T03F1.3.1	681	1	1077	1365	no	3	11	1262	MKLSRPPLPEPSQSLEEVTLRPPPRSITRKIRCLTSQLEVEPVWNCSKEKFCQELMLFRQLNNFLISIVYSLPNSVFVFILSLSKNFPTLVLNCSQ
T03F1.3	T03F1.3.2	683	3	491	677	no	2	13	1264	MSMMLSEPLTEPIAPWLESSTHNVQVDSCSRTSSPTLARPSTTQLVHSWPSLEELRSLTRFS
T03F1.3	T03F1.3.2	684	3	284	449	no	2	13	1264	MFSSSTTVSDQKWRLHAPIQLLDQSFSLKIFVIIWKRRAKESMHPVPRLRLIQQP
T03F1.3	T03F1.3.2	685	3	1079	1367	no	2	13	1264	MKLSRPPLPEPSQSLEEVTLRPPPRSITRKIRCLTSQLEVEPVWNCSKEKFCQELMLFRQLNNFLISIVYSLPNSVFVFILSLSKNFPTLVLNCSQ
T03F1.3	T03F1.3.2	686	3	935	1073	no	2	13	1264	MATWDLMLGRNLLRSSPLPFNAPKRLSGTVQQEYSSLINSPQAPSH
W05F2.7	W05F2.7	688	2	2716	2887	no	1	0	3681	MTPRRLLATQLMASQTLTEVSSKINLTAPAISCPMPGIRLPQIIQRVVGMARGSVGL
W05F2.7	W05F2.7	689	2	958	1078	no	1	0	3681	MTLTPCTPQTPHQSPCPICIHRPLSAISGRLVMLQTHLVL
W05F2.7	W05F2.7	690	2	142	265	no	1	0	3681	MTTSRTKFLHRHHQTHSIKSPTPFGFCSAINLRVLKLVLSL
Y47G6A.32	Y47G6A.32	692	2	175	352	no	1	0	738	MFVAQYPQKRAFLELFAQFELPVESFRAREMLSSFSSVCVCVCSASTETVSRLIRIATE
Y47G6A.32	Y47G6A.32	693	2	433	562	no	1	0	738	MVLQLNIHQAFFQYLFTVLGTKQQRHQPHQQQNPRTSQKSGRH
Y73E7A.3	Y73E7A.3a	698	2	1084	1222	no	1	0	1287	MRMNPDEYVRAFLCVAVVAGAVLRKEIVPKDPLMYHHLQMNECRWA
Y73E7A.3	Y73E7A.3a	699	3	770	992	no	1	0	1287	MYCFRCADSRIRTRSLVENRVGWDYCLLFCVVRLFNVHILLIGYCSSAEDVRIDVQSIDTDRRFLFALVWNLYV
Y73E7A.3	Y73E7A.3b.2	701	1	1209	1347	no	1	0	1017	MRMNPDEYVRAFLCVAVVAGAVLRKEIVPKDPLMYHHLQMNECRWA
Y73E7A.3	Y73E7A.3b.2	702	3	1187	1412	no	1	0	1017	MKETQVRDADEPRRVCPCLFVCCCCCGCCFEEGDSTEGSIDVSPSPNERMQMGLNPRGSMSPCPVHGGSQQLSHL
Y73E7A.3	Y73E7A.3b.2	703	3	929	1115	no	1	0	1017	MYCFRCADGTFNDVCVMEFDWSEICDCYALTHCRYFSHKFLIFPSKIFLIFYIFICAKFFSQ
Y73E7A.3	Y73E7A.3b.1	705	3	929	1115	no	1	0	1017	MYCFRCADGTFNDVCVMEFDWSEICDCYALTHCRYFSHKFLIFPSKIFLIFYIFICAKFFSQ
F28H1.2	F28H1.2	707	2	394	601	no	1	87	513	MRRHSSLWSSSKDAIFSPSASLFSRSAEFSKRPERPTHSPKNQPIQLKNSKNGQALAMFHPIPSHILII
ZC308.1	ZC308.1c	709	2	3097	3217	no	1	0	3108	MYLNEIFLLSDLLSSIQTSHTIAKTMTLLFPFCKRYFNLS
ZC308.1	ZC308.1c	710	2	2074	2200	no	1	0	3108	MILINHFLKRRHSESFLLDSLIITQMSSIMIVMPSRFGKEDV
ZC308.1	ZC308.1c	711	2	3460	3712	yes	1	0	3108	MAFSPPTFPCILTRKVQNEVHVSTTPHSSFPTPSILPKIQIICTNFRKINKKNCKHLKIPLIFANFQNTMTSRRHPHAAEFCLS
ZC308.1	ZC308.1b	713	2	1579	1705	no	1	0	2613	MILINHFLKRRHSESFLLDSLIITQMSSIMIVMPSRFGKEDV
ZC308.1	ZC308.1b	714	2	271	448	no	1	0	2613	MCRHFWFPMNQLQEIMKKKKKTMKMEMMNPIIMTMITKMTEKDQNMIMNKLIMTMMKMR
ZC308.1	ZC308.1b	715	2	2965	3217	yes	1	0	2613	MAFSPPTFPCILTRKVQNEVHVSTTPHSSFPTPSILPKIQIICTNFRKINKKNCKHLKIPLIFANFQNTMTSRRHPHAAEFCLS
ZC308.1	ZC308.1b	716	2	535	688	no	1	0	2613	MLSRWKIGSWMLLNEHTEKVILPSCMLTCRGGSIHIRQPHFVLLESFCAMG
ZC308.1	ZC308.1b	717	2	2602	2722	no	1	0	2613	MYLNEIFLLSDLLSSIQTSHTIAKTMTLLFPFCKRYFNLS
ZC308.1	ZC308.1b	718	2	31	250	no	1	0	2613	MKEKHPGDHHPPHGYPTGSAIPCVTCTIIFRLLKIEENIITQYRHSHLHPPQHLWKGFPHRRVLQHLLLRPTR
ZC308.1	ZC308.1d	720	3	1985	2111	no	2	598	3019	MILINHFLKRRHSESFLLDSLIITQMSSIMIVMPSRFGKEDV
ZC308.1	ZC308.1d	721	3	3008	3128	no	2	598	3019	MYLNEIFLLSDLLSSIQTSHTIAKTMTLLFPFCKRYFNLS
ZC308.1	ZC308.1d	722	3	3371	3623	yes	2	598	3019	MAFSPPTFPCILTRKVQNEVHVSTTPHSSFPTPSILPKIQIICTNFRKINKKNCKHLKIPLIFANFQNTMTSRRHPHAAEFCLS
ZC308.1	ZC308.1a	724	3	3392	3512	no	2	64	3403	MYLNEIFLLSDLLSSIQTSHTIAKTMTLLFPFCKRYFNLS
ZC308.1	ZC308.1a	725	3	3755	4007	yes	2	64	3403	MAFSPPTFPCILTRKVQNEVHVSTTPHSSFPTPSILPKIQIICTNFRKINKKNCKHLKIPLIFANFQNTMTSRRHPHAAEFCLS
ZC308.1	ZC308.1a	726	3	2369	2495	no	2	64	3403	MILINHFLKRRHSESFLLDSLIITQMSSIMIVMPSRFGKEDV
ZC308.1	ZC308.1a	727	3	248	875	yes	2	64	3403	MGTLDTTTTIQEIKDKPTITSAADAVTIIAGIAIINRMASILGIRDVSQNIIKGIKITLNCNQSIPTSNHIRDQFLTRPRVTAHILSVGHRHHLHQLYQAQQRIPHQTELRRSLQSCSGTLSQLVIRIIKEAIMSKIMILKFICTGRLAPHRVDILNAHLRTNSHHHNLRLHHHLPINGLSSNKQRIGRRGFNILLHNSDAGRIQCQPQ
F33H2.2	F33H2.2	729	1	2163	2373	no	3	80	2528	MSHYQKMVVYSKNCCQALLSTIFYYWIVFLEYRCSIRCLTRRFAKGFWGAAFWNNRTARTSKTRTNKWLE
T04D3.5	T04D3.5.1	731	1	747	927	no	3	194	1094	MSRRSGLRRWRNVSSVCMEIGMRSLHRWSVCFRIMCSCRRILQRCSELVRIHMSSKRRVK
T04D3.5	T04D3.5.2	733	1	696	876	no	3	143	1043	MSRRSGLRRWRNVSSVCMEIGMRSLHRWSVCFRIMCSCRRILQRCSELVRIHMSSKRRVK
F52B5.5	F52B5.5a.1	735	2	1111	1306	no	1	6	1938	MIDEKRCALRSFWTMKMETKFSTHTSNKFELLPIHDVTGRISVSEKTQNKRISDFPSYLPTRRRA
F52B5.5	F52B5.5a.1	736	2	661	784	no	1	6	1938	MKIVKNGWKLTFLNRKWQKVQIWHLQFHRNTKNIFGLKWDV
F52B5.5	F52B5.5a.2	739	3	1160	1355	no	2	55	1987	MIDEKRCALRSFWTMKMETKFSTHTSNKFELLPIHDVTGRISVSEKTQNKRISDFPSYLPTRRRA
F52B5.5	F52B5.5a.2	740	3	710	833	no	2	55	1987	MKIVKNGWKLTFLNRKWQKVQIWHLQFHRNTKNIFGLKWDV
F35E2.1	F35E2.1	742	3	830	1004	no	1	0	1035	MVCSNIPWAISHATLVNSRNSKYTKRIIGYSFMWMFPKTISRTQSNEIDDYCNYGIET
F35E2.1	F35E2.1	743	3	161	371	yes	1	0	1035	MAFQCTSCHFRESKKSYLDVIKEHSSVCNSWLISSKYSIDFISSMDGFQFTSRSTTSIYRFCLLISQEFL
K04G2.3	K04G2.3	745	2	2053	2203	no	1	0	2172	MLQSCNGRILNKLLPQLFPELKRIFLKFMTILKQVELRTHENNCLPDCYC
K04G2.3	K04G2.3	746	2	679	826	no	1	0	2172	MLLQKDRLQMFFKLFQLTYQILVDVSPPNKFSKIMLSVQFVKKSHRVQF
K04G2.3	K04G2.3	747	3	749	911	no	1	0	2172	MFHRQTSSRRLCYQSSSSKRVTVFSFDLGTSWKWKDTSFERSCVSSFWINNLHW
W05H12.2	W05H12.2	749	2	271	610	yes	1	0	987	MEDFTEWIHFGFWKGLQMLQAQDQIMLGEHSRMLSSMEPVLIIHPFTVLNLWDWQETTQFNIHNSQTSQFESRKTSSKRTDSWHHSIVNALYQSSSTRNPHIFPFVIGIGWLC
F33D11.3	F33D11.3	754	2	337	907	yes	1	0	843	MELPDLRWYLKMRSFHALNAQLVNQDHKDLMVHQVHQDQMDSQELQDPTEIQDLPENKDQKENQEMLEQQEKLELQEHQERMETVDLVLQELQVQKDQLENQEKMDNKDHMEMLEVMELKEFKEHQEKMEKMDLMELQEVMELQEHQDQMLPIVHVQQELSLFFLVNLHKLFNVSKYLIYQLLLFAIKCH
F14B6.3	F14B6.3.1	757	2	406	532	no	1	165	1263	MEKTLLRIMSRKPILKTKQIMKVKPPILNLGKTHRIRISQKP
F14B6.3	F14B6.3.1	758	2	832	985	no	1	165	1263	MKRRMMTTSLTWKVKKKIVLTRTWTMKIRKESPQLSQGSQKLSKNRKLENR
F14B6.3	F14B6.3.2	760	3	830	983	no	2	163	1261	MKRRMMTTSLTWKVKKKIVLTRTWTMKIRKESPQLSQGSQKLSKNRKLENR
F14B6.3	F14B6.3.2	761	3	404	530	no	2	163	1261	MEKTLLRIMSRKPILKTKQIMKVKPPILNLGKTHRIRISQKP
F32B5.2	F32B5.2	766	2	466	613	no	1	0	1041	MCQRCIRNTWHANLHQMNGTKLNGNPQFDTRRSEMESMARIGQMILRTL
T08G11.1	T08G11.1b.2	768	2	8242	8365	no	1	3	9558	MEKKCSTKISKFATLHSLKLQAHTVLSAPRASTTIFTFLQL
T08G11.1	T08G11.1b.2	769	2	1510	1693	no	1	3	9558	MELFQCNFSNSLRVSNKGQVLVQCTSNHRSKSFEWMVAVQKLFVFVILLFLGCPSFLTLIH
T08G11.1	T08G11.1b.2	770	2	6298	6604	no	1	3	9558	MVHSLESTSILLSTRKRSRMVLMIRQRVSIMFTYILHSSSTTTFHSTLISNFLNKKFSVQECLHFLMLSLVARLKRGSPILEKSMSWTCQFQKSRKMLKLSR
T08G11.1	T08G11.1b.2	771	2	2458	2767	no	1	3	9558	MSHRKKKEAMMMKKKRKRRPVSSRCRLNSIFVSIKLVLWFIGRMLCSVTFLFLKWLANFKCEHLTWLLPLSSALSKSQCPNSNRWMRNANIFILSTMMSYKVH
T08G11.1	T08G11.1b.2	772	2	4129	4270	no	1	3	9558	MLDHQLSRSHILELCSSSYLIRFQQFFTREKLSTVNEKNLMLSLLFD
T08G11.1	T08G11.1b.2	773	2	7564	7732	no	1	3	9558	MLTLPKQRTVVGKLMLLICKQKFHSKDSDCLSLITLSVVKSFTWQSLLRISFGKKK
T08G11.1	T08G11.1b.2	774	2	6046	6193	no	1	3	9558	MSSSQIICHMLWRFIQNEIPLWICLALWNMEKRFLWQFRCYSPHREIFI
T08G11.1	T08G11.1b.2	775	2	4537	4762	no	1	3	9558	MFHNRKSNLRNKLSLPMFLLKQSQRLQVLRQLSPVVPKLLRDLHNLLELSRSIVICMEWKLFLLKILCIQNPLKH
T08G11.1	T08G11.1b.2	776	2	469	592	no	1	3	9558	MFVSRIDTPIVIVLLQWESLWKSLISRPLTKTGERRFTRMW
T08G11.1	T08G11.1b.2	777	2	5347	5500	no	1	3	9558	MLKHMIGHQLCVFPREYQFKCHIIMSQLAYGSPLLSLWKMRRESSRDGSWL
T08G11.1	T08G11.1b.2	778	2	808	949	no	1	3	9558	MAPTGRFLKLTWLSICMHFRLLLVNSNIKMFCYSSRLKKDSMQLGNI
T08G11.1	T08G11.1b.2	779	2	298	421	no	1	3	9558	MKKRWQRIFKKSNRRHWLGWKRLEKSAESQKIHKRTHSLKR
T08G11.1	T08G11.1b.2	780	2	1882	2014	no	1	3	9558	MQSNIVLGSCLTFRFNRLEFMSAKVELIVLRSRHYSLIWVSSPL
T08G11.1	T08G11.1b.1	782	3	1880	2012	no	2	0	9556	MQSNIVLGSCLTFRFNRLEFMSAKVELIVLRSRHYSLIWVSSPL
T08G11.1	T08G11.1b.1	783	3	467	590	no	2	0	9556	MFVSRIDTPIVIVLLQWESLWKSLISRPLTKTGERRFTRMW
T08G11.1	T08G11.1b.1	784	3	806	947	no	2	0	9556	MAPTGRFLKLTWLSICMHFRLLLVNSNIKMFCYSSRLKKDSMQLGNI
T08G11.1	T08G11.1b.1	785	3	6296	6602	no	2	0	9556	MVHSLESTSILLSTRKRSRMVLMIRQRVSIMFTYILHSSSTTTFHSTLISNFLNKKFSVQECLHFLMLSLVARLKRGSPILEKSMSWTCQFQKSRKMLKLSR
T08G11.1	T08G11.1b.1	786	3	2456	2765	no	2	0	9556	MSHRKKKEAMMMKKKRKRRPVSSRCRLNSIFVSIKLVLWFIGRMLCSVTFLFLKWLANFKCEHLTWLLPLSSALSKSQCPNSNRWMRNANIFILSTMMSYKVH
T08G11.1	T08G11.1b.1	787	3	296	419	no	2	0	9556	MKKRWQRIFKKSNRRHWLGWKRLEKSAESQKIHKRTHSLKR
T08G11.1	T08G11.1b.1	788	3	6044	6191	no	2	0	9556	MSSSQIICHMLWRFIQNEIPLWICLALWNMEKRFLWQFRCYSPHREIFI
T08G11.1	T08G11.1b.1	789	3	7562	7730	no	2	0	9556	MLTLPKQRTVVGKLMLLICKQKFHSKDSDCLSLITLSVVKSFTWQSLLRISFGKKK
T08G11.1	T08G11.1b.1	790	3	4535	4760	no	2	0	9556	MFHNRKSNLRNKLSLPMFLLKQSQRLQVLRQLSPVVPKLLRDLHNLLELSRSIVICMEWKLFLLKILCIQNPLKH
T08G11.1	T08G11.1b.1	791	3	8240	8363	no	2	0	9556	MEKKCSTKISKFATLHSLKLQAHTVLSAPRASTTIFTFLQL
T08G11.1	T08G11.1b.1	792	3	5345	5498	no	2	0	9556	MLKHMIGHQLCVFPREYQFKCHIIMSQLAYGSPLLSLWKMRRESSRDGSWL
T08G11.1	T08G11.1b.1	793	3	4127	4268	no	2	0	9556	MLDHQLSRSHILELCSSSYLIRFQQFFTREKLSTVNEKNLMLSLLFD
T08G11.1	T08G11.1b.1	794	3	1508	1691	no	2	0	9556	MELFQCNFSNSLRVSNKGQVLVQCTSNHRSKSFEWMVAVQKLFVFVILLFLGCPSFLTLIH
T08G11.1	T08G11.1a.1	796	3	1880	2012	no	2	0	9637	MQSNIVLGSCLTFRFNRLEFMSAKVELIVLRSRHYSLIWVSSPL
T08G11.1	T08G11.1a.1	797	3	467	590	no	2	0	9637	MFVSRIDTPIVIVLLQWESLWKSLISRPLTKTGERRFTRMW
T08G11.1	T08G11.1a.1	798	3	6728	6875	no	2	0	9637	MWRAVETCCQTLRAGVFHAERSRSSHLKRTMTLFSIYQLRIQSSCHSLQ
T08G11.1	T08G11.1a.1	799	3	806	947	no	2	0	9637	MAPTGRFLKLTWLSICMHFRLLLVNSNIKMFCYSSRLKKDSMQLGNI
T08G11.1	T08G11.1a.1	800	3	6296	6602	no	2	0	9637	MVHSLESTSILLSTRKRSRMVLMIRQRVSIMFTYILHSSSTTTFHSTLISNFLNKKFSVQECLHFLMLSLVARLKRGSPILEKSMSWTCQFQKSRKMLKLSR
T08G11.1	T08G11.1a.1	801	3	2456	2765	no	2	0	9637	MSHRKKKEAMMMKKKRKRRPVSSRCRLNSIFVSIKLVLWFIGRMLCSVTFLFLKWLANFKCEHLTWLLPLSSALSKSQCPNSNRWMRNANIFILSTMMSYKVH
T08G11.1	T08G11.1a.1	802	3	296	419	no	2	0	9637	MKKRWQRIFKKSNRRHWLGWKRLEKSAESQKIHKRTHSLKR
T08G11.1	T08G11.1a.1	803	3	6044	6191	no	2	0	9637	MSSSQIICHMLWRFIQNEIPLWICLALWNMEKRFLWQFRCYSPHREIFI
T08G11.1	T08G11.1a.1	804	3	8321	8444	no	2	0	9637	MEKKCSTKISKFATLHSLKLQAHTVLSAPRASTTIFTFLQL
T08G11.1	T08G11.1a.1	805	3	7643	7811	no	2	0	9637	MLTLPKQRTVVGKLMLLICKQKFHSKDSDCLSLITLSVVKSFTWQSLLRISFGKKK
T08G11.1	T08G11.1a.1	806	3	4535	4760	no	2	0	9637	MFHNRKSNLRNKLSLPMFLLKQSQRLQVLRQLSPVVPKLLRDLHNLLELSRSIVICMEWKLFLLKILCIQNPLKH
T08G11.1	T08G11.1a.1	807	3	5345	5498	no	2	0	9637	MLKHMIGHQLCVFPREYQFKCHIIMSQLAYGSPLLSLWKMRRESSRDGSWL
T08G11.1	T08G11.1a.1	808	3	4127	4268	no	2	0	9637	MLDHQLSRSHILELCSSSYLIRFQQFFTREKLSTVNEKNLMLSLLFD
T08G11.1	T08G11.1a.1	809	3	1508	1691	no	2	0	9637	MELFQCNFSNSLRVSNKGQVLVQCTSNHRSKSFEWMVAVQKLFVFVILLFLGCPSFLTLIH
T08G11.1	T08G11.1a.2	811	2	1510	1693	no	1	3	9639	MELFQCNFSNSLRVSNKGQVLVQCTSNHRSKSFEWMVAVQKLFVFVILLFLGCPSFLTLIH
T08G11.1	T08G11.1a.2	812	2	6298	6604	no	1	3	9639	MVHSLESTSILLSTRKRSRMVLMIRQRVSIMFTYILHSSSTTTFHSTLISNFLNKKFSVQECLHFLMLSLVARLKRGSPILEKSMSWTCQFQKSRKMLKLSR
T08G11.1	T08G11.1a.2	813	2	7645	7813	no	1	3	9639	MLTLPKQRTVVGKLMLLICKQKFHSKDSDCLSLITLSVVKSFTWQSLLRISFGKKK
T08G11.1	T08G11.1a.2	814	2	2458	2767	no	1	3	9639	MSHRKKKEAMMMKKKRKRRPVSSRCRLNSIFVSIKLVLWFIGRMLCSVTFLFLKWLANFKCEHLTWLLPLSSALSKSQCPNSNRWMRNANIFILSTMMSYKVH
T08G11.1	T08G11.1a.2	815	2	4129	4270	no	1	3	9639	MLDHQLSRSHILELCSSSYLIRFQQFFTREKLSTVNEKNLMLSLLFD
T08G11.1	T08G11.1a.2	816	2	6046	6193	no	1	3	9639	MSSSQIICHMLWRFIQNEIPLWICLALWNMEKRFLWQFRCYSPHREIFI
T08G11.1	T08G11.1a.2	817	2	4537	4762	no	1	3	9639	MFHNRKSNLRNKLSLPMFLLKQSQRLQVLRQLSPVVPKLLRDLHNLLELSRSIVICMEWKLFLLKILCIQNPLKH
T08G11.1	T08G11.1a.2	818	2	6730	6877	no	1	3	9639	MWRAVETCCQTLRAGVFHAERSRSSHLKRTMTLFSIYQLRIQSSCHSLQ
T08G11.1	T08G11.1a.2	819	2	469	592	no	1	3	9639	MFVSRIDTPIVIVLLQWESLWKSLISRPLTKTGERRFTRMW
T08G11.1	T08G11.1a.2	820	2	5347	5500	no	1	3	9639	MLKHMIGHQLCVFPREYQFKCHIIMSQLAYGSPLLSLWKMRRESSRDGSWL
T08G11.1	T08G11.1a.2	821	2	808	949	no	1	3	9639	MAPTGRFLKLTWLSICMHFRLLLVNSNIKMFCYSSRLKKDSMQLGNI
T08G11.1	T08G11.1a.2	822	2	298	421	no	1	3	9639	MKKRWQRIFKKSNRRHWLGWKRLEKSAESQKIHKRTHSLKR
T08G11.1	T08G11.1a.2	823	2	1882	2014	no	1	3	9639	MQSNIVLGSCLTFRFNRLEFMSAKVELIVLRSRHYSLIWVSSPL
T08G11.1	T08G11.1a.2	824	2	8323	8446	no	1	3	9639	MEKKCSTKISKFATLHSLKLQAHTVLSAPRASTTIFTFLQL
C46H11.4	C46H11.4e	826	2	547	1078	no	1	0	1422	MKEALYPPRLIRYTRNSVQIVEKEELIRIFQKTQHLMDSHLNIMMNWRKMKSILSKSKISCNSSMTPQKPQLWTSKSEQGHFWNQKYQTPKNGLIFTKKWLRLIMTSRQKRRESVEQSQNYDTCSLGNERAALHSSDFELRQPRGSKAHWRKTSKKYEQLKMSQLHLWTSLELKEAV
C46H11.4	C46H11.4e	827	3	1457	1751	no	1	0	1422	MKVCVSSYSAIIISVIPHRSSTKSSSVYNLLLFNFTPPPASPCFCWFFEKENRFFEKENRFSLFNLSLSPSLFLYHGIIPRLSSYFQLFFLFHCVRSE
C46H11.4	C46H11.4b	829	1	1362	1656	no	2	145	1327	MKVCVSSYSAIIISVIPHRSSTKSSSVYNLLLFNFTPPPASPCFCWFFEKENRFFEKENRFSLFNLSLSPSLFLYHGIIPRLSSYFQLFFLFHCVRSE
C46H11.4	C46H11.4b	830	3	452	983	no	2	145	1327	MKEALYPPRLIRYTRNSVQIVEKEELIRIFQKTQHLMDSHLNIMMNWRKMKSILSKSKISCNSSMTPQKPQLWTSKSEQGHFWNQKYQTPKNGLIFTKKWLRLIMTSRQKRRESVEQSQNYDTCSLGNERAALHSSDFELRQPRGSKAHWRKTSKKYEQLKMSQLHLWTSLELKEAV
C46H11.4	C46H11.4d	832	2	472	1003	no	1	0	1347	MKEALYPPRLIRYTRNSVQIVEKEELIRIFQKTQHLMDSHLNIMMNWRKMKSILSKSKISCNSSMTPQKPQLWTSKSEQGHFWNQKYQTPKNGLIFTKKWLRLIMTSRQKRRESVEQSQNYDTCSLGNERAALHSSDFELRQPRGSKAHWRKTSKKYEQLKMSQLHLWTSLELKEAV
C46H11.4	C46H11.4d	833	3	1382	1676	no	1	0	1347	MKVCVSSYSAIIISVIPHRSSTKSSSVYNLLLFNFTPPPASPCFCWFFEKENRFFEKENRFSLFNLSLSPSLFLYHGIIPRLSSYFQLFFLFHCVRSE
C46H11.4	C46H11.4a	835	2	607	1138	no	1	0	1482	MKEALYPPRLIRYTRNSVQIVEKEELIRIFQKTQHLMDSHLNIMMNWRKMKSILSKSKISCNSSMTPQKPQLWTSKSEQGHFWNQKYQTPKNGLIFTKKWLRLIMTSRQKRRESVEQSQNYDTCSLGNERAALHSSDFELRQPRGSKAHWRKTSKKYEQLKMSQLHLWTSLELKEAV
C46H11.4	C46H11.4a	836	3	1517	1811	no	1	0	1482	MKVCVSSYSAIIISVIPHRSSTKSSSVYNLLLFNFTPPPASPCFCWFFEKENRFFEKENRFSLFNLSLSPSLFLYHGIIPRLSSYFQLFFLFHCVRSE
C46H11.4	C46H11.4f	838	2	499	1030	no	1	0	1374	MKEALYPPRLIRYTRNSVQIVEKEELIRIFQKTQHLMDSHLNIMMNWRKMKSILSKSKISCNSSMTPQKPQLWTSKSEQGHFWNQKYQTPKNGLIFTKKWLRLIMTSRQKRRESVEQSQNYDTCSLGNERAALHSSDFELRQPRGSKAHWRKTSKKYEQLKMSQLHLWTSLELKEAV
C46H11.4	C46H11.4f	839	3	1409	1703	no	1	0	1374	MKVCVSSYSAIIISVIPHRSSTKSSSVYNLLLFNFTPPPASPCFCWFFEKENRFFEKENRFSLFNLSLSPSLFLYHGIIPRLSSYFQLFFLFHCVRSE
C46H11.4	C46H11.4c	841	1	564	1095	no	3	56	1439	MKEALYPPRLIRYTRNSVQIVEKEELIRIFQKTQHLMDSHLNIMMNWRKMKSILSKSKISCNSSMTPQKPQLWTSKSEQGHFWNQKYQTPKNGLIFTKKWLRLIMTSRQKRRESVEQSQNYDTCSLGNERAALHSSDFELRQPRGSKAHWRKTSKKYEQLKMSQLHLWTSLELKEAV
C46H11.4	C46H11.4c	842	2	1474	1768	no	3	56	1439	MKVCVSSYSAIIISVIPHRSSTKSSSVYNLLLFNFTPPPASPCFCWFFEKENRFFEKENRFSLFNLSLSPSLFLYHGIIPRLSSYFQLFFLFHCVRSE
Y110A7A.9	Y110A7A.9a.1	844	2	823	955	no	1	39	3096	MLCSLCIRMEQPLFELQNLSQPRRKSRTPVFRWIRSVKQNACVQ
Y110A7A.9	Y110A7A.9a.1	845	2	1240	1432	no	1	39	3096	MILLQTQLSEPFISQLSEQILEQFIWSTFSLLKSIVIFVFNHLLLNALNGAVFILLLLLDIIIL
Y110A7A.9	Y110A7A.9a.1	846	2	2236	2410	no	1	39	3096	MFVNTLKDPEAENLQKTEVRLINQRTAHSKTQLHGSIRIRDLKLKHLKLTYQNFNVNE
Y110A7A.9	Y110A7A.9a.1	847	2	2101	2230	no	1	39	3096	MRTFVDYRRWFFQMIIHCVLWFLIRKINRFWRKKSHSSTKMTR
Y110A7A.9	Y110A7A.9a.1	848	2	2830	2968	no	1	39	3096	MLASIYNHRNYGRKVLYMQRWDWTILLKSSQNGSDTLPTRLNKFVF
Y110A7A.9	Y110A7A.9a.1	849	3	386	506	no	1	39	3096	MERHFSRFPSSSSFIQYSCSMEYGDWRKSLESYIFPCSTF
Y110A7A.9	Y110A7A.9b	851	1	1764	1893	no	3	35	2759	MRTFVDYRRWFFQMIIHCVLWFLIRKINRFWRKKSHSSTKMTR
Y110A7A.9	Y110A7A.9b	852	1	1899	2073	no	3	35	2759	MFVNTLKDPEAENLQKTEVRLINQRTAHSKTQLHGSIRIRDLKLKHLKLTYQNFNVNE
Y110A7A.9	Y110A7A.9b	853	1	2493	2631	no	3	35	2759	MLASIYNHRNYGRKVLYMQRWDWTILLKSSQNGSDTLPTRLNKFVF
Y110A7A.9	Y110A7A.9b	854	1	903	1095	no	3	35	2759	MILLQTQLSEPFISQLSEQILEQFIWSTFSLLKSIVIFVFNHLLLNALNGAVFILLLLLDIIIL
Y110A7A.9	Y110A7A.9b	855	1	486	618	no	3	35	2759	MLCSLCIRMEQPLFELQNLSQPRRKSRTPVFRWIRSVKQNACVQ
Y110A7A.9	Y110A7A.9b	856	2	49	169	no	3	35	2759	MERHFSRFPSSSSFIQYSCSMEYGDWRKSLESYIFPCSTF
Y110A7A.9	Y110A7A.9a.2	858	1	393	513	no	2	46	3103	MERHFSRFPSSSSFIQYSCSMEYGDWRKSLESYIFPCSTF
Y110A7A.9	Y110A7A.9a.2	859	3	2108	2237	no	2	46	3103	MRTFVDYRRWFFQMIIHCVLWFLIRKINRFWRKKSHSSTKMTR
Y110A7A.9	Y110A7A.9a.2	860	3	2837	2975	no	2	46	3103	MLASIYNHRNYGRKVLYMQRWDWTILLKSSQNGSDTLPTRLNKFVF
Y110A7A.9	Y110A7A.9a.2	861	3	2243	2417	no	2	46	3103	MFVNTLKDPEAENLQKTEVRLINQRTAHSKTQLHGSIRIRDLKLKHLKLTYQNFNVNE
Y110A7A.9	Y110A7A.9a.2	862	3	1247	1439	no	2	46	3103	MILLQTQLSEPFISQLSEQILEQFIWSTFSLLKSIVIFVFNHLLLNALNGAVFILLLLLDIIIL
Y110A7A.9	Y110A7A.9a.2	863	3	830	962	no	2	46	3103	MLCSLCIRMEQPLFELQNLSQPRRKSRTPVFRWIRSVKQNACVQ
F26H9.8	F26H9.8	865	2	976	1111	no	1	0	4143	MKHCKDQYKKDKKLSKQKELNQEQIFWQLTEELLLKETHLLIYLL
F26H9.8	F26H9.8	866	2	2311	2539	no	1	0	4143	MISIIWIHFGKRKEQQKLQRFSTKIQCMTSLSVSTALSQKNLKKTSKEWILMSSWNQEMEIQSYFLQLIPPIQQLL
F26H9.8	F26H9.8	867	2	3772	4009	no	1	0	4143	MLLILRRSASSQLETAFVVGTTAYLLIRTVFRIWIKIFRTTCFTKFLLNHYLRNGFGVRHGVMMEVKKRQKQLTCATIH
Y37F4.4	Y37F4.4	870	2	85	250	no	1	0	288	MSNNQLFRLLLQHQLKSSNSQKFRLQLQQFQMFNSLSWFQKLLNSFHHQLLFFIS
T06D10.1	T06D10.1.2	872	2	979	1129	no	1	453	966	MSSNFTIIKTDQQAPPTFLSVFFTFFSTPMFLSYRCRHCLASSPSGVFHS
T06D10.1	T06D10.1.1	874	2	979	1129	no	1	453	966	MSSNFTIIKTDQQAPPTFLSVFFTFFSTPMFLSYRCRHCLASSPSGVFHS
T15D6.11	T15D6.11	876	2	481	727	no	1	0	1014	MTLLQRNCSAEHFPTQRSTEPTQFMNRIDSCTRLSESSSHLLLEKSRDSRNSESSRTRIKKQENTFTRMLLQFHFCIFCTTS
Y54E5A.1	Y54E5A.1	878	2	976	1198	no	1	9	1095	MEIISYLNMLKGSSTILVSTAFKSLQLTCLISTITARSSTSLGRIKYRCSLLNKLFVCSKHSSHFCWQILLTTF
CC4.3	CC4.3	880	1	1437	1644	yes	2	82	1612	MGIRNCRGRCHVLFYGIIGYPGNYSSRDRTSSNWFGSSSTSESHRFICRRWTFKIMDRLIFPRFPHDFF
CC4.3	CC4.3	881	3	1142	1271	no	2	82	1612	MSDIPMREIILSHVQQMVQFVFGMENRVNAFQHSVLEVKIIQY
F29D10.2	F29D10.2	883	2	142	466	yes	1	0	447	MEAVVDVVDVEEVVEDVDVVVVDQDAVAVVDLNVVVLVVELVAVLDVVLAADHAVVDVVADVVVDAVDVEVEVVSVVPFKNFELMKPIVHLGLKKDHLMTNVSPIIYX
W02B9.1	W02B9.1d.1	887	1	2466	2586	no	2	4	3196	MHRNVSLVETESPTETRRSNGRERRIDCLNFQHGRSPRRL
W02B9.1	W02B9.1d.1	888	1	3426	3699	no	2	4	3196	MQDYARFSNFFSNFFLSYNNPRIAFEIHYTHTLLIFFQFLHNHKYLYYYFFERNFTYIYVYLYVFPVTRFPLATPTFCFFFYFFLLNIYFF
W02B9.1	W02B9.1d.1	889	2	3436	3682	no	2	4	3196	MQDFLTFFPIFFYPITIPELLSKFITHTHCSSFFNSYIITSTSTTTFLSEISLIYMSIYMYFLLPVSLLPPPHFVSFSTFFC
W02B9.1	W02B9.1d.1	890	3	2132	2507	no	2	4	3196	MEHRRSSRSEQTPNRVTFQRIWNPVKMESLPPENSISEPEDDVLDRNFVCRRCCSRRMRVIGSNSRGIRLGRACRSIMRIRYLRSWIRENHSRCKLIRLHLAHRDRIRDSRDASERIVGRNRISH
W02B9.1	W02B9.1d.1	891	3	470	653	no	2	4	3196	MLMMQTIGILETRRSLGRIAAPASSSLTRDPSRWLVKWLLVPIRCLRMFMITLVTRTLSVM
W02B9.1	W02B9.1d.1	892	3	1928	2129	no	2	4	3196	METVLRMFRVRVRWLPSVFVIRDGVEHDVNDEWNGFNSHRELLLSTLHALHSRNKYPTLSFSSFLEK
W02B9.1	W02B9.1d.1	893	3	3107	3230	no	2	4	3196	MRHRTMNFGSTTMSGTIFLSSRWRVSKVPNKRRTILSSLFF
W02B9.1	W02B9.1d.1	894	3	1130	1265	no	2	4	3196	MQHHVMIVHAPCGELHRLVSIPFVIMMVCVIIRILDSFVNAVMMD
W02B9.1	W02B9.1d.1	895	3	953	1115	no	2	4	3196	MDSSQLTEQIFNESLTSKLLESELICASLHSVMPDVRLSTLLTMMELLYQPIQQ
W02B9.1	W02B9.1d.2	897	1	2466	2586	no	2	4	3196	MHRNVSLVETESPTETRRSNGRERRIDCLNFQHGRSPRRL
W02B9.1	W02B9.1d.2	898	3	2132	2507	no	2	4	3196	MEHRRSSRSEQTPNRVTFQRIWNPVKMESLPPENSISEPEDDVLDRNFVCRRCCSRRMRVIGSNSRGIRLGRACRSIMRIRYLRSWIRENHSRCKLIRLHLAHRDRIRDSRDASERIVGRNRISH
W02B9.1	W02B9.1d.2	899	3	470	653	no	2	4	3196	MLMMQTIGILETRRSLGRIAAPASSSLTRDPSRWLVKWLLVPIRCLRMFMITLVTRTLSVM
W02B9.1	W02B9.1d.2	900	3	1928	2129	no	2	4	3196	METVLRMFRVRVRWLPSVFVIRDGVEHDVNDEWNGFNSHRELLLSTLHALHSRNKYPTLSFSSFLEK
W02B9.1	W02B9.1d.2	901	3	3107	3230	no	2	4	3196	MRHRTMNFGSTTMSGTIFLSSRWRVSKVPNKRRTILSSLFF
W02B9.1	W02B9.1d.2	902	3	1130	1265	no	2	4	3196	MQHHVMIVHAPCGELHRLVSIPFVIMMVCVIIRILDSFVNAVMMD
W02B9.1	W02B9.1d.2	903	3	953	1115	no	2	4	3196	MDSSQLTEQIFNESLTSKLLESELICASLHSVMPDVRLSTLLTMMELLYQPIQQ
W02B9.1	W02B9.1c.1	905	1	3759	4005	no	1	0	3519	MQDFLTFFPIFFYPITIPELLSKFITHTHCSSFFNSYIITSTSTTTFLSEISLIYMSIYMYFLLPVSLLPPPHFVSFSTFFC
W02B9.1	W02B9.1c.1	906	2	1453	1588	no	1	0	3519	MQHHVMIVHAPCGELHRLVSIPFVIMMVCVIIRILDSFVNAVMMD
W02B9.1	W02B9.1c.1	907	2	2455	2830	no	1	0	3519	MEHRRSSRSEQTPNRVTFQRIWNPVKMESLPPENSISEPEDDVLDRNFVCRRCCSRRMRVIGSNSRGIRLGRACRSIMRIRYLRSWIRENHSRCKLIRLHLAHRDRIRDSRDASERIVGRNRISH
W02B9.1	W02B9.1c.1	908	2	1276	1438	no	1	0	3519	MDSSQLTEQIFNESLTSKLLESELICASLHSVMPDVRLSTLLTMMELLYQPIQQ
W02B9.1	W02B9.1c.1	909	2	793	976	no	1	0	3519	MLMMQTIGILETRRSLGRIAAPASSSLTRDPSRWLVKWLLVPIRCLRMFMITLVTRTLSVM
W02B9.1	W02B9.1c.1	910	2	3430	3553	no	1	0	3519	MRHRTMNFGSTTMSGTIFLSSRWRVSKVPNKRRTILSSLFF
W02B9.1	W02B9.1c.1	911	2	2251	2452	no	1	0	3519	METVLRMFRVRVRWLPSVFVIRDGVEHDVNDEWNGFNSHRELLLSTLHALHSRNKYPTLSFSSFLEK
W02B9.1	W02B9.1c.1	912	3	2789	2909	no	1	0	3519	MHRNVSLVETESPTETRRSNGRERRIDCLNFQHGRSPRRL
W02B9.1	W02B9.1c.1	913	3	3749	4022	no	1	0	3519	MQDYARFSNFFSNFFLSYNNPRIAFEIHYTHTLLIFFQFLHNHKYLYYYFFERNFTYIYVYLYVFPVTRFPLATPTFCFFFYFFLLNIYFF
W02B9.1	W02B9.1b	915	1	9108	9354	no	1	108	8868	MQDFLTFFPIFFYPITIPELLSKFITHTHCSSFFNSYIITSTSTTTFLSEISLIYMSIYMYFLLPVSLLPPPHFVSFSTFFC
W02B9.1	W02B9.1b	916	2	6142	6325	no	1	108	8868	MLMMQTIGILETRRSLGRIAAPASSSLTRDPSRWLVKWLLVPIRCLRMFMITLVTRTLSVM
W02B9.1	W02B9.1b	917	2	6625	6787	no	1	108	8868	MDSSQLTEQIFNESLTSKLLESELICASLHSVMPDVRLSTLLTMMELLYQPIQQ
W02B9.1	W02B9.1b	918	2	4711	4879	no	1	108	8868	MSEISMTTPRYSLNDFSDILRRIGSQFIPTVSTSWTCRPETLTIRRQKTRISNMEL
W02B9.1	W02B9.1b	919	2	4897	5047	no	1	108	8868	MESRYSESIRTPERSSQCVPWIGRSVPRGSSSSKFGQMIEVSHRGRVLQM
W02B9.1	W02B9.1b	920	2	4555	4708	no	1	108	8868	MKCFELESIRGQLSWSRRWIEILRQEFRHGILWFRRLMMMGMDWWDMQMCR
W02B9.1	W02B9.1b	921	2	7600	7801	no	1	108	8868	METVLRMFRVRVRWLPSVFVIRDGVEHDVNDEWNGFNSHRELLLSTLHALHSRNKYPTLSFSSFLEK
W02B9.1	W02B9.1b	922	2	6802	6937	no	1	108	8868	MQHHVMIVHAPCGELHRLVSIPFVIMMVCVIIRILDSFVNAVMMD
W02B9.1	W02B9.1b	923	2	4345	4525	no	1	108	8868	MDATTLPPMSTFTSRMLMTMLHSSSSKSTRLQSSRRTWIFRRFCSMFTRRMLIRMRRAVG
W02B9.1	W02B9.1b	924	2	4084	4297	no	1	108	8868	MMLMTMLHRLRSKSISEGLRNRRERVMMLSLSRHMIWINIPTSAITSSEPVVDGSPSASEQIPVPYSSRNP
W02B9.1	W02B9.1b	925	2	8779	8902	no	1	108	8868	MRHRTMNFGSTTMSGTIFLSSRWRVSKVPNKRRTILSSLFF
W02B9.1	W02B9.1b	926	2	5365	5632	no	1	108	8868	MQKRRCTWHSSIATTTRHTFTEPQNTESERTCHVEQALDDTRQRIGMPETRQDSESIANRIRNVNSLLIRMEHFVLLTHLIERILPFII
W02B9.1	W02B9.1b	927	2	7804	8179	no	1	108	8868	MEHRRSSRSEQTPNRVTFQRIWNPVKMESLPPENSISEPEDDVLDRNFVCRRCCSRRMRVIGSNSRGIRLGRACRSIMRIRYLRSWIRENHSRCKLIRLHLAHRDRIRDSRDASERIVGRNRISH
W02B9.1	W02B9.1b	928	2	2908	3088	no	1	108	8868	MLFLIGRHGPGRMLLLRQLIVVTAHLLASVSSLWKSSTSMITPHNSNDLPMKHQCPDLKL
W02B9.1	W02B9.1b	929	3	8138	8258	no	1	108	8868	MHRNVSLVETESPTETRRSNGRERRIDCLNFQHGRSPRRL
W02B9.1	W02B9.1b	930	3	9098	9371	no	1	108	8868	MQDYARFSNFFSNFFLSYNNPRIAFEIHYTHTLLIFFQFLHNHKYLYYYFFERNFTYIYVYLYVFPVTRFPLATPTFCFFFYFFLLNIYFF
W02B9.1	W02B9.1a	932	1	3342	3462	no	2	265	4072	MHRNVSLVETESPTETRRSNGRERRIDCLNFQHGRSPRRL
W02B9.1	W02B9.1a	933	1	4302	4575	no	2	265	4072	MQDYARFSNFFSNFFLSYNNPRIAFEIHYTHTLLIFFQFLHNHKYLYYYFFERNFTYIYVYLYVFPVTRFPLATPTFCFFFYFFLLNIYFF
W02B9.1	W02B9.1a	934	2	4312	4558	no	2	265	4072	MQDFLTFFPIFFYPITIPELLSKFITHTHCSSFFNSYIITSTSTTTFLSEISLIYMSIYMYFLLPVSLLPPPHFVSFSTFFC
W02B9.1	W02B9.1a	935	3	2804	3005	no	2	265	4072	METVLRMFRVRVRWLPSVFVIRDGVEHDVNDEWNGFNSHRELLLSTLHALHSRNKYPTLSFSSFLEK
W02B9.1	W02B9.1a	936	3	1346	1529	no	2	265	4072	MLMMQTIGILETRRSLGRIAAPASSSLTRDPSRWLVKWLLVPIRCLRMFMITLVTRTLSVM
W02B9.1	W02B9.1a	937	3	2006	2141	no	2	265	4072	MQHHVMIVHAPCGELHRLVSIPFVIMMVCVIIRILDSFVNAVMMD
W02B9.1	W02B9.1a	938	3	3983	4106	no	2	265	4072	MRHRTMNFGSTTMSGTIFLSSRWRVSKVPNKRRTILSSLFF
W02B9.1	W02B9.1a	939	3	3008	3383	no	2	265	4072	MEHRRSSRSEQTPNRVTFQRIWNPVKMESLPPENSISEPEDDVLDRNFVCRRCCSRRMRVIGSNSRGIRLGRACRSIMRIRYLRSWIRENHSRCKLIRLHLAHRDRIRDSRDASERIVGRNRISH
W02B9.1	W02B9.1a	940	3	1829	1991	no	2	265	4072	MDSSQLTEQIFNESLTSKLLESELICASLHSVMPDVRLSTLLTMMELLYQPIQQ
W02B9.1	W02B9.1e.2	942	2	1534	1735	no	1	0	2802	METVLRMFRVRVRWLPSVFVIRDGVEHDVNDEWNGFNSHRELLLSTLHALHSRNKYPTLSFSSFLEK
W02B9.1	W02B9.1e.2	943	2	76	259	no	1	0	2802	MLMMQTIGILETRRSLGRIAAPASSSLTRDPSRWLVKWLLVPIRCLRMFMITLVTRTLSVM
W02B9.1	W02B9.1e.2	944	2	559	721	no	1	0	2802	MDSSQLTEQIFNESLTSKLLESELICASLHSVMPDVRLSTLLTMMELLYQPIQQ
W02B9.1	W02B9.1e.2	945	2	736	871	no	1	0	2802	MQHHVMIVHAPCGELHRLVSIPFVIMMVCVIIRILDSFVNAVMMD
W02B9.1	W02B9.1e.2	946	2	1738	2113	no	1	0	2802	MEHRRSSRSEQTPNRVTFQRIWNPVKMESLPPENSISEPEDDVLDRNFVCRRCCSRRMRVIGSNSRGIRLGRACRSIMRIRYLRSWIRENHSRCKLIRLHLAHRDRIRDSRDASERIVGRNRISH
W02B9.1	W02B9.1e.2	947	2	2713	2836	no	1	0	2802	MRHRTMNFGSTTMSGTIFLSSRWRVSKVPNKRRTILSSLFF
W02B9.1	W02B9.1e.2	948	3	2072	2192	no	1	0	2802	MHRNVSLVETESPTETRRSNGRERRIDCLNFQHGRSPRRL
W02B9.1	W02B9.1e.1	950	1	3042	3288	no	1	0	2802	MQDFLTFFPIFFYPITIPELLSKFITHTHCSSFFNSYIITSTSTTTFLSEISLIYMSIYMYFLLPVSLLPPPHFVSFSTFFC
W02B9.1	W02B9.1e.1	951	2	1534	1735	no	1	0	2802	METVLRMFRVRVRWLPSVFVIRDGVEHDVNDEWNGFNSHRELLLSTLHALHSRNKYPTLSFSSFLEK
W02B9.1	W02B9.1e.1	952	2	76	259	no	1	0	2802	MLMMQTIGILETRRSLGRIAAPASSSLTRDPSRWLVKWLLVPIRCLRMFMITLVTRTLSVM
W02B9.1	W02B9.1e.1	953	2	559	721	no	1	0	2802	MDSSQLTEQIFNESLTSKLLESELICASLHSVMPDVRLSTLLTMMELLYQPIQQ
W02B9.1	W02B9.1e.1	954	2	736	871	no	1	0	2802	MQHHVMIVHAPCGELHRLVSIPFVIMMVCVIIRILDSFVNAVMMD
W02B9.1	W02B9.1e.1	955	2	1738	2113	no	1	0	2802	MEHRRSSRSEQTPNRVTFQRIWNPVKMESLPPENSISEPEDDVLDRNFVCRRCCSRRMRVIGSNSRGIRLGRACRSIMRIRYLRSWIRENHSRCKLIRLHLAHRDRIRDSRDASERIVGRNRISH
W02B9.1	W02B9.1e.1	956	2	2713	2836	no	1	0	2802	MRHRTMNFGSTTMSGTIFLSSRWRVSKVPNKRRTILSSLFF
W02B9.1	W02B9.1e.1	957	3	3032	3305	no	1	0	2802	MQDYARFSNFFSNFFLSYNNPRIAFEIHYTHTLLIFFQFLHNHKYLYYYFFERNFTYIYVYLYVFPVTRFPLATPTFCFFFYFFLLNIYFF
W02B9.1	W02B9.1e.1	958	3	2072	2192	no	1	0	2802	MHRNVSLVETESPTETRRSNGRERRIDCLNFQHGRSPRRL
W02B9.1	W02B9.1c.2	960	2	1453	1588	no	1	0	3519	MQHHVMIVHAPCGELHRLVSIPFVIMMVCVIIRILDSFVNAVMMD
W02B9.1	W02B9.1c.2	961	2	2455	2830	no	1	0	3519	MEHRRSSRSEQTPNRVTFQRIWNPVKMESLPPENSISEPEDDVLDRNFVCRRCCSRRMRVIGSNSRGIRLGRACRSIMRIRYLRSWIRENHSRCKLIRLHLAHRDRIRDSRDASERIVGRNRISH
W02B9.1	W02B9.1c.2	962	2	1276	1438	no	1	0	3519	MDSSQLTEQIFNESLTSKLLESELICASLHSVMPDVRLSTLLTMMELLYQPIQQ
W02B9.1	W02B9.1c.2	963	2	793	976	no	1	0	3519	MLMMQTIGILETRRSLGRIAAPASSSLTRDPSRWLVKWLLVPIRCLRMFMITLVTRTLSVM
W02B9.1	W02B9.1c.2	964	2	3430	3553	no	1	0	3519	MRHRTMNFGSTTMSGTIFLSSRWRVSKVPNKRRTILSSLFF
W02B9.1	W02B9.1c.2	965	2	2251	2452	no	1	0	3519	METVLRMFRVRVRWLPSVFVIRDGVEHDVNDEWNGFNSHRELLLSTLHALHSRNKYPTLSFSSFLEK
W02B9.1	W02B9.1c.2	966	3	2789	2909	no	1	0	3519	MHRNVSLVETESPTETRRSNGRERRIDCLNFQHGRSPRRL
F53G12.7	F53G12.7	968	2	370	1060	no	1	0	981	MPSVDGVHRDHRVMTGSTERTEKTVHLEPMEKTVRYHKDQPTEVIKRDHLMQLKHAHVNAHQDRLDQLERPETKDLEATLENLESQAPREAPDRKEMLDQLDHQDHPDIQDVLEKPEITERRSPERRHLDHQDDKEKWVHKDHRDHQGHVERTEPVERRVLREIKVIRDHMENLGNRELQDPMALLVRREDAIIAHRQELHLVIKDSSIDILFYFHDVIHFVIRFSFVAI
F53G12.7	F53G12.7	969	3	545	866	no	1	0	981	MPTRTAWTNWSARRQRISRLPWRIWRARHPGKRRTERKCWTSWTTRTTRISRTSWRNRRSRKDDRRRGATWTTRTTRRNGSTRTTGTTRATWKGRSRWREGCSGRSR
F53G12.7	F53G12.7	970	3	941	1085	no	1	0	981	MRSLPTAKNSTWLLKILRLIFYFIFMTLFILSFGFLLLQYDNKSDSLA
K02F2.3	K02F2.3	972	2	2185	2326	no	1	0	3660	MRIWNTRQASAQISAQKELSPFLPVHSELLQPRSLEWHLMFNHLNIR
K02F2.3	K02F2.3	973	2	688	940	no	1	0	3660	MIQETCLSQFQVVMTVRLVSSCAVKTIWCTRILVINQILDVRFQEEETSSMTQTEQCSSLRRLLIKRKICTFSLFKLKMEIFSK
K02F2.3	K02F2.3	974	2	3196	3334	no	1	0	3660	MKMYRMIQLYRRVFGIVDGLMELHKRSNLFRISSSVTRLQAFRRRH
K02F2.3	K02F2.3	975	2	505	625	no	1	0	3660	MQWLESMWDLRILLLRVWNLIMRMLTTIQPEKQQNEHNKR
K02F2.3	K02F2.3	976	2	3583	3730	no	1	0	3660	MLLKNWEKLSARSQRSWKTFALATPFNIIYLFLFVEFLHFYFIFKCFFS
K02F2.3	K02F2.3	977	2	2389	2584	no	1	0	3660	MRLIQKLPKILREIKWLRTLKQWHQTRQKLNLHKKLLQIFVNDDSMSECTEHHEQLEENGHLLSV
K02F2.3	K02F2.3	978	2	2635	3043	no	1	0	3660	MRMQNAWLLCNSRSIRMKLWCWLVVELMKFLMYMTLIQMIHPFGQLEDVFIHSIYQQMVIDSTFCTERKHHCQWEQFMISVAWHSSVLVDSSECTTLDRKSYWQSAKTRISQFQLSIFNQQDNESSSRIAKNLFTF
K02F2.3	K02F2.3	979	2	1537	1672	no	1	0	3660	MILLFRSTRKVFVIFGQISVSMNGRHHHGDKLSSVLLIDDKLQLH
K02F2.3	K02F2.3	980	3	2093	2300	no	1	0	3660	MSGTICDSLYIFPFMASLSLPTPLSFDTTQLCEFGIRGKLLLKSVLRRNCRHFCQYTQNYCSREAWSGI
F36A2.9	F36A2.9b	982	2	1492	1663	yes	1	0	1695	MDGSRLWRNHRKNWKKRRKKSKRRCLQDKILEHNLNRRQLQLVSSLHQFLSDVTNHF
F36A2.9	F36A2.9b	983	3	500	662	yes	1	0	1695	MAKCGYRVSRCQFPDWWRFYYRWIDHHSKYSEGVQSKISRRISRNGSRSSESSA
F36A2.9	F36A2.9b	984	3	1007	1139	yes	1	0	1695	MVQSLARCSKICGEWSYSQTNIRNDQLSNGNYNLKISKWIVHSR
F36A2.9	F36A2.9a	986	2	1357	1552	no	1	0	1584	MGLLQRVIMDGSRLWRNHRKNWKKRRKKSKRRCLQDKILEHNLNRRQLQLVSSLHQFLSDVTNHF
F36A2.9	F36A2.9a	987	3	500	662	yes	1	0	1584	MAKCGYRVSRCQFPDWWRFYYRWIDHHSKYSEGVQSKISRRISRNGSRSSESSA
F36A2.9	F36A2.9a	988	3	1007	1139	yes	1	0	1584	MVQSLARCSKICGEWSYSQTNIRNDQLSNGNYNLKISKWIVHSR
F47G4.6	F47G4.6	990	3	35	362	no	1	9	393	MLPYSKRLRPMVRSGANNSLVDRWKFKFAANSGDGPEEEKDTLNIRLRAILPGTAVAGETGRAIRHLWSDLTENRPAMGLADRGGEEGLQTAMREKSEDKHRQRRRGEG
E01A2.10	E01A2.10	992	1	699	825	no	3	41	1136	MELFYHEIEKRYLYHILIKKLLECLRGIRRKSLSRRFQKLRL
E01A2.10	E01A2.10	993	2	877	1012	no	3	41	1136	MPSSSKRRCRSPRRRHQSKPLLPISSSSFQILIRPKKYRNVRSVL
T27A3.4	T27A3.4	995	3	389	614	no	2	31	640	MDAQDALVRPSVLAPEAAQGLAQDPALHHALVPAPAEAPAAALVIAHLRRLVDVVRRLQRRLLPKDVAAAEASRR
C17H1.5	C17H1.5	997	2	259	427	no	1	150	1203	MSERSMWHECRKKRRNIMKTCYDLRIPALQRGNPQRKHIGNRLNNSKKNTKTKRKS
Y44E3A.2	Y44E3A.2	999	2	115	247	no	1	0	1887	MSCTRRWEQYGASDRLSTVQKYLHSLVSRTQNLQSVQDVSRWRR
Y44E3A.2	Y44E3A.2	1000	3	431	572	yes	1	0	1887	MDLWRRVFQWDSISGSLQWIRIRCEGAHNRGQCELQAGPIRISLLRR
C30F12.4	C30F12.4	1002	2	148	397	no	1	120	858	MKSPHSRLMEEFNFWGPKLSSTFLHEEWRLCGNISDQRFLNILNNNRHHIIHLKSIHQFHLLHQFNHSLKWFQFQCQWFNSST
C30F12.4	C30F12.4	1003	3	650	776	no	1	120	858	MSKRNHHAKTRSIEKEDFDVPCRVLLSSDMLSPTHLHLLQLR
Y105E8A.23	Y105E8A.23a	1005	2	1138	1387	no	1	0	3414	MYLNQYLKNWEMHSKKKWVTMRMRSGNAYSPRISIISRIRKFRVKIHTENGGINRVKRKESLQIFNLKWEIWIQRHEMKCAMF
Y105E8A.23	Y105E8A.23a	1006	2	526	649	no	1	0	3414	MRKVGKQLRIYLMKCNEKWLYWHKMYGFPTNNWRFLLERKI
Y105E8A.23	Y105E8A.23a	1007	2	2593	2722	no	1	0	3414	MMCILMWHRESSKNGNKTNNRTVRIVTWHVNFEKLFHKMYREK
Y105E8A.23	Y105E8A.23a	1008	2	2371	2572	no	1	0	3414	MVRNGGCHLMNHGRHLPLVLRSKMLLGTVVTWHCFQVNCQFIRMEVVMDYSIMRHWEEIMRVEYRLI
Y105E8A.23	Y105E8A.23a	1009	3	2960	3203	no	1	0	3414	MDYTPWTTSCTTILQTCRTKGKIDSGTCSDETSRRFSAEFCAFSGFYTYDAHLVELCTERNHICRSSRLFLDARQFGRSNE
Y105E8A.23	Y105E8A.23b	1011	2	1138	1387	no	1	0	3468	MYLNQYLKNWEMHSKKKWVTMRMRSGNAYSPRISIISRIRKFRVKIHTENGGINRVKRKESLQIFNLKWEIWIQRHEMKCAMF
Y105E8A.23	Y105E8A.23b	1012	2	526	649	no	1	0	3468	MRKVGKQLRIYLMKCNEKWLYWHKMYGFPTNNWRFLLERKI
Y105E8A.23	Y105E8A.23b	1013	2	2593	2722	no	1	0	3468	MMCILMWHRESSKNGNKTNNRTVRIVTWHVNFEKLFHKMYREK
Y105E8A.23	Y105E8A.23b	1014	2	2371	2572	no	1	0	3468	MVRNGGCHLMNHGRHLPLVLRSKMLLGTVVTWHCFQVNCQFIRMEVVMDYSIMRHWEEIMRVEYRLI
Y105E8A.23	Y105E8A.23b	1015	3	3014	3257	no	1	0	3468	MDYTPWTTSCTTILQTCRTKGKIDSGTCSDETSRRFSAEFCAFSGFYTYDAHLVELCTERNHICRSSRLFLDARQFGRSNE
F26B1.2	F26B1.2a	1017	1	1695	1824	no	2	16	1207	MLLILFPCFLKECACRLLGTLTRSHNPPCPCKLSPKGVCFFLT
F26B1.2	F26B1.2a	1018	2	1342	1507	no	2	16	1207	MNSVLSALLFPQTLSLFYFLVFLTNVSCLLTSSVRSRASSCFFLPSLPMFNSLEL
F26B1.2	F26B1.2a	1019	3	647	872	no	2	16	1207	MILPTSLIMEVFPETCLQVDHQTIAVQRHNEEGKDLQVDQDRMEELLHKEVVRDPSKPAISNSSAEGQDLFQGTL
F26B1.2	F26B1.2a	1020	3	344	488	no	2	16	1207	MCFHVWKIISRSAIRVKCACSSISHMLELLSDATDPKLRSSVRNALHV
F26B1.2	F26B1.2b	1024	2	292	493	no	1	3	204	MLVHQSHAGALIGRNGSKIKELREKCSARLKIFTGCAPGSTDRVLITSGEQKNVLGIIEEVMKELKX
F26B1.2	F26B1.2b	1025	3	236	380	no	1	3	204	MCFHVWKIISRSAIRVKCACSSISHMLELLSDATDPKLRSSVRNALHV
F26B1.2	F26B1.2c.2	1027	1	1278	1443	no	1	3	1143	MNSVLSALLFPQTLSLFYFLVFLTNVSCLLTSSVRSRASSCFFLPSLPMFNSLEL
F26B1.2	F26B1.2c.2	1028	2	280	424	no	1	3	1143	MCFHVWKIISRSAIRVKCACSSISHMLELLSDATDPKLRSSVRNALHV
F26B1.2	F26B1.2c.2	1029	2	583	808	no	1	3	1143	MILPTSLIMEVFPETCLQVDHQTIAVQRHNEEGKDLQVDQDRMEELLHKEVVRDPSKPAISNSSAEGQDLFQGTL
F26B1.2	F26B1.2c.2	1030	3	1631	1760	no	1	3	1143	MLLILFPCFLKECACRLLGTLTRSHNPPCPCKLSPKGVCFFLT
F26B1.2	F26B1.2c.1	1032	1	1302	1467	no	1	27	1167	MNSVLSALLFPQTLSLFYFLVFLTNVSCLLTSSVRSRASSCFFLPSLPMFNSLEL
F26B1.2	F26B1.2c.1	1033	2	304	448	no	1	27	1167	MCFHVWKIISRSAIRVKCACSSISHMLELLSDATDPKLRSSVRNALHV
F26B1.2	F26B1.2c.1	1034	2	607	832	no	1	27	1167	MILPTSLIMEVFPETCLQVDHQTIAVQRHNEEGKDLQVDQDRMEELLHKEVVRDPSKPAISNSSAEGQDLFQGTL
F26B1.2	F26B1.2c.1	1035	3	1655	1784	no	1	27	1167	MLLILFPCFLKECACRLLGTLTRSHNPPCPCKLSPKGVCFFLT
T10E9.7	T10E9.7b.1	1037	1	348	642	no	3	5	809	MFQLARIVLKLFIRFTLFDSTPEFVFVHTLMKLLQSILPLQFSRVLTGLSVKCTICMEYGSTITQIFEEFSLITVSRVTHSARIIHFRDTTRSATIQS
T10E9.7	T10E9.7a	1039	3	263	386	no	2	64	1399	MMCWNWSRLSEIKINVINSKCRPKTLDSSLARTAPKSTKLN
T10E9.7	T10E9.7a	1040	3	938	1232	no	2	64	1399	MFQLARIVLKLFIRFTLFDSTPEFVFVHTLMKLLQSILPLQFSRVLTGLSVKCTICMEYGSTITQIFEEFSLITVSRVTHSARIIHFRDTTRSATIQS
T10E9.7	T10E9.7b.2	1042	2	346	640	no	1	3	807	MFQLARIVLKLFIRFTLFDSTPEFVFVHTLMKLLQSILPLQFSRVLTGLSVKCTICMEYGSTITQIFEEFSLITVSRVTHSARIIHFRDTTRSATIQS
Y39G10AR.18	Y39G10AR.18b.2	1044	2	1399	1735	no	1	60	1818	MLFGILMKRCHIQMWILQSSLTWSLQLGPRILSLKFFFPMTHRQRLSIRKFHRLLLLPAVHVSQSHVLIILQLGLVVVENVAPLVAVNPTVVVVVEPLKTSSSRFGNSCSTR
Y39G10AR.18	Y39G10AR.18b.2	1045	2	160	730	no	1	60	1818	MTYFLVGLLDLCGRRRLSKPPLRLINRRNGMSLIRTTRRRPRSLRRRSCSASSKMPRRLHLIIMVHRQVQERIGRRKRRRKRIKSMKKRRLRRRNRQKVQVHATHRKLLPLTTTITALTRYPTLLTSSVRPSQKPQLHHLHWFRLRLEPQLLHHHQHHQQLELRARNVKSPWSRRLTLFIMEEDSLMRKL
Y39G10AR.18	Y39G10AR.18a.2	1047	2	1270	1750	no	1	0	2838	MSLIRTTRRRPRSLRRRSCSASSKMPRRLHLIIMVHRQVQERIGRRKRRRKRIKSMKKRRLRRRNRQKVQVHATHRKLLPLTTTITALTRYPTLLTSSVRPSQKPQLHHLHWFRLRLEPQLLHHHQHHQQLELRARNVKSPWSRRLTLFIMEEDSLMRKL
Y39G10AR.18	Y39G10AR.18a.2	1048	2	2419	2755	no	1	0	2838	MLFGILMKRCHIQMWILQSSLTWSLQLGPRILSLKFFFPMTHRQRLSIRKFHRLLLLPAVHVSQSHVLIILQLGLVVVENVAPLVAVNPTVVVVVEPLKTSSSRFGNSCSTR
Y39G10AR.18	Y39G10AR.18a.1	1050	2	1270	1750	no	1	0	2838	MSLIRTTRRRPRSLRRRSCSASSKMPRRLHLIIMVHRQVQERIGRRKRRRKRIKSMKKRRLRRRNRQKVQVHATHRKLLPLTTTITALTRYPTLLTSSVRPSQKPQLHHLHWFRLRLEPQLLHHHQHHQQLELRARNVKSPWSRRLTLFIMEEDSLMRKL
Y39G10AR.18	Y39G10AR.18a.1	1051	2	2419	2755	no	1	0	2838	MLFGILMKRCHIQMWILQSSLTWSLQLGPRILSLKFFFPMTHRQRLSIRKFHRLLLLPAVHVSQSHVLIILQLGLVVVENVAPLVAVNPTVVVVVEPLKTSSSRFGNSCSTR
Y39G10AR.18	Y39G10AR.18b.1	1053	2	1399	1735	no	1	60	1818	MLFGILMKRCHIQMWILQSSLTWSLQLGPRILSLKFFFPMTHRQRLSIRKFHRLLLLPAVHVSQSHVLIILQLGLVVVENVAPLVAVNPTVVVVVEPLKTSSSRFGNSCSTR
Y39G10AR.18	Y39G10AR.18b.1	1054	2	160	730	no	1	60	1818	MTYFLVGLLDLCGRRRLSKPPLRLINRRNGMSLIRTTRRRPRSLRRRSCSASSKMPRRLHLIIMVHRQVQERIGRRKRRRKRIKSMKKRRLRRRNRQKVQVHATHRKLLPLTTTITALTRYPTLLTSSVRPSQKPQLHHLHWFRLRLEPQLLHHHQHHQQLELRARNVKSPWSRRLTLFIMEEDSLMRKL
F30F8.1	F30F8.1	1056	2	1345	1543	no	1	63	1998	MSTSWSLIQANMEDFVSLGIQIVSFLQSFLLQTKSVLKDVECLFIQLGAKIRQAREVGSFGMIHLD
F30F8.1	F30F8.1	1057	2	739	886	no	1	63	1998	MMLLLTFLKTMTSSIQIKQYHSLPAERVLKTLIFHIFRVKRFFLTCSLN
F30F8.1	F30F8.1	1058	2	1921	2239	no	1	63	1998	MCHLGSGAERKYGSETFCLQEPMLGVEGATIQFLNVSFPTLVTFTKYLSSDSPTFFSLPYSFLDTSLILFVRFSTCSDNPTVIVSKFFHINIRHFIIFFGTKNVFX
F30F8.1	F30F8.1	1059	3	1028	1151	no	1	63	1998	MGIIRNWSTRWYIFLVYRPSISTNEPNRVLQFGDRYSYQYG
F49D11.7	F49D11.7	1061	2	4	193	no	1	0	201	MDQDMLHIMVHHMETHVMVRPMVQPMGLLMFNQLLNQFMYMIHVRKKPVVPEPAVWHYSVVVQ
F37E3.3	F37E3.3	1065	2	565	721	no	1	60	1317	MERSRKHCSKNFITRLFQTSKCSMRILSREKHWQRETFQFVFQLELFSTHQH
F37E3.3	F37E3.3	1066	2	115	262	no	1	60	1317	MMTILRMPFLTMFPSLSLKLLCSKIQATSVCRNHWMVPIIFQLFLEIIR
F37E3.3	F37E3.3	1067	2	313	433	no	1	60	1317	MNTLFKECCLPVLRHLNNWSIISRMTLPTFLVVYWMRTFQ
F37E3.3	F37E3.3	1068	2	1009	1156	no	1	60	1317	MIRMLQKLPSLVNFQRKAAFSLWDVSSSKFSSLKFSSLTVSHHKKSLVF
Y47G6A.7	Y47G6A.7b.1	1070	3	527	668	no	1	135	1338	MPSNTSNTCLIPRSTAMVGSNWNMCFNGYRSFELGIRICHCQSVHNG
Y47G6A.7	Y47G6A.7a.3	1072	2	529	670	no	3	137	1367	MPSNTSNTCLIPRSTAMVGSNWNMCFNGYRSFELGIRICHCQSVHNG
Y47G6A.7	Y47G6A.7b.3	1074	2	529	670	no	3	137	1340	MPSNTSNTCLIPRSTAMVGSNWNMCFNGYRSFELGIRICHCQSVHNG
Y47G6A.7	Y47G6A.7b.2	1076	2	580	721	no	3	188	1391	MPSNTSNTCLIPRSTAMVGSNWNMCFNGYRSFELGIRICHCQSVHNG
Y47G6A.7	Y47G6A.7a.1	1078	3	527	668	no	1	135	1365	MPSNTSNTCLIPRSTAMVGSNWNMCFNGYRSFELGIRICHCQSVHNG
Y47G6A.7	Y47G6A.7a.2	1080	2	580	721	no	3	188	1418	MPSNTSNTCLIPRSTAMVGSNWNMCFNGYRSFELGIRICHCQSVHNG
R06C1.4	R06C1.4	1082	3	173	377	no	2	82	334	MLTTSESCTIVKPDAHAVSHSSSSPRKPELKEPSNNLTELPSMDATFVSTTPTSKLTTPPSDSKRLHL
F45H11.3	F45H11.3	1085	2	907	1048	no	1	0	2214	MRKYTKILWLFSLIVWEPVFSIIIIEFCRDMLPVIFLPIIRREWKNF
F45H11.3	F45H11.3	1086	2	2143	2317	no	1	0	2214	MLNASTNPDKLFGRRPSRNVSRRTRTPIFIPYISKCFIIFLIFITYSPHSFPKLSLLL
F45H11.3	F45H11.3	1087	2	43	334	no	1	0	2214	MRENVKRTKTTTLSQSATCTLELQRKSSPSMFEKECCIVRMWKLHTRMYTTIWLQFPTTKLFLCIILSMVCTCQSQLLDSFTHLFAMFIMILLHFCT
F45H11.3	F45H11.3	1088	2	427	589	no	1	0	2214	METLNSMIQRRTKKCLMLKMKIVILKKLVRTRKNMKMKKVKNMTMMMNLELRQF
F28D9.2	F28D9.2a	1090	3	338	494	no	1	0	1020	MLHLPPQCSRKFQSEIQNTPVNPISGNRNVSHFPICHRDLLAKIRAEPRAAS
F28D9.2	F28D9.2b	1092	3	215	371	no	1	0	945	MLHLPPQCSRKFQSEIQNTPVNPISGNRNVSHFPICHRDLLAKIRAEPRAAS
F10G8.3	F10G8.3.2	1094	1	15	192	no	2	328	1447	MINEERKAEIKRMLEKCRKTENRQKFWRWLPNFQLNSWQTPVVIGVAAVSAAIIYHYFS
F10G8.3	F10G8.3.2	1095	3	422	605	no	2	328	1447	MMTFWLMELQRTQFRSSSSAPHRKINQCWHADLGTVQFECGCSMMPTHSKEKHSKTFQLQF
F10G8.3	F10G8.3.2	1096	3	98	239	yes	2	328	1447	MVAQFSVEQLADSCCHWCCSCFCCNYLSLFFLITLIPIVQFFFILIL
F10G8.3	F10G8.3.1	1098	3	95	278	no	2	0	1120	MMTFWLMELQRTQFRSSSSAPHRKINQCWHADLGTVQFECGCSMMPTHSKEKHSKTFQLQF
ZC334.7	ZC334.7	1100	1	210	378	no	3	26	656	MKPTRSSTPYKKPPSPSFTPDRRTTTEVTVAIVRIPLSHSVILMWDILIDRPDATR
ZC334.7	ZC334.7	1101	1	444	630	no	3	26	656	MEIFHRTFWNWSETRTGSVSFKWIYSKSPAKPPSPTSSSAGTLSVDRRTSSTCITRDNYGRR
ZC334.7	ZC334.7	1102	2	400	646	no	3	26	656	MCAVPESQASFGYHLWRYSIALFGTGRRRGLAASASSGSTQSHPPSHLPLRLRLRELYRWIVGPLQHASLGTTTAGAEQLHV
C37A2.3	C37A2.3	1104	2	505	637	no	1	27	1353	MLFAKDSFVHQSLEILSVHWLYLNHMLDPMYQLCTHTHVVKDLT
C37A2.3	C37A2.3	1105	2	973	1132	no	1	27	1353	MRQLNMQGIDCFSERLFLINNTFNSNWLSWKQSSRQLVHCCIELFWHEAVEMM
C37A2.3	C37A2.3	1106	2	202	472	no	1	27	1353	MMKLILSCRRVWENLSKKKSIQMWQNGNKTGGIQHIWYSKCLEIMVFLVLINQKHLVELERILQWQQQLLSRWEQLIVDQFQCQLWFRLI
T21G5.4	T21G5.4	1108	1	540	714	no	3	71	893	MLMEFQSVTRMLPEIFSSRISKRKEKSLLSSSALIRSMPSNGRNRRWLPISCNHHQSK
T21G5.4	T21G5.4	1109	2	661	859	yes	3	71	893	MGETGVGYQSHATTISPNERRCERHCFAISSSSSRTEASSEECNVYRSKCSPCFYHRANSNSRDRT
Y26D4A.10	Y26D4A.10	1112	2	532	691	no	1	0	1248	MEENIIFLFTDLLKTRIVLHLPIHRTSQQRWLSINFNGSFQRLFHVLKCKINY
M01G12.12	M01G12.12	1114	2	661	919	no	1	0	4737	MMISHRLKSLSINVQIDTVALGRRSTVPHMSQPSLIVHSSQLNCKNRNRMGIRETRMIRYIVYFLVYALELESKSNLQIFQKSMFR
M01G12.12	M01G12.12	1115	2	3595	3754	no	1	0	4737	MLTMRATSLISVVRIRMRRLERKPWLGIGLVMSAPNPLVNLGSFHSPGLHMMS
M01G12.12	M01G12.12	1116	2	2392	2659	no	1	0	4737	MNHSSDPLSRRQSSLLSPNNCSKSKSKYPASLVDRCLALSTRLGFYNTDRSLFNTRKITGTYSHLEIPIGKFSVVRLLLEPCCSLKTRA
M01G12.12	M01G12.12	1117	2	2764	2908	no	1	0	4737	MKWQDRIWMEMSILSFGIRNCYSRGMRRRLTLRWRKTYRHTSGKTLTT
C16C2.1	C16C2.1	1119	3	401	524	no	2	13	415	MSFRHNHFEFQSYDKRTKETHLLLIIFPFLSPRFGLVCFSS
Y63D3A.10	Y63D3A.10	1121	2	205	358	no	1	0	831	MKNLSSNLMNLERCLNRNHRMRLYFLLRISLISAIASITFSKFIKYQSYIH
Y63D3A.10	Y63D3A.10	1122	2	514	634	no	1	0	831	MLDLSDEDSMTKSRRSHSFFCVSRSHTLSHKSHTRAPQRH
F39B2.4	F39B2.4a	1124	1	1425	1548	no	3	8	4769	MRQLNRISSLFKTVLIISIQATLQCWRFCRIFIERIQKWEN
F39B2.4	F39B2.4a	1125	1	4122	4317	no	3	8	4769	MCLNQNQLQSRKHHRKRKNHRKKRRSRNKSNMSKLTNLSNQHLPFPHYRKCNIIYNKHHYYHHIK
F39B2.4	F39B2.4b	1127	1	4128	4323	no	3	8	4775	MCLNQNQLQSRKHHRKRKNHRKKRRSRNKSNMSKLTNLSNQHLPFPHYRKCNIIYNKHHYYHHIK
C01A2.6	C01A2.6	1129	2	478	691	no	1	0	540	MPNGKSASRNDCAKRDVTGFYKALNILYSRDFIHVLNQSTLFIFLHLFSSFSGFHVVPRLSHPALFISVLI
C01A2.6	C01A2.6	1130	3	362	527	no	1	0	540	MALEWKTGLLASRGSRFHSTMVHRVDKGAGGRSFEERERCRMGSPRAETTAPRET
T21E12.3	T21E12.3	1132	2	850	1003	no	1	12	1050	MKVLHVRHQLPMSRTMWQTWRIIPTIFVDMLEFVTSTRIPKPSKKLEVTVQ
T21E12.3	T21E12.3	1133	3	113	326	no	1	12	1050	MWPGSKIKIWIWTKSSKWTENKNRRCSMECSNRNRNKRCWIMYRNSYFDTPRHHRPSLFCTFDGLRICIDW
K04F10.6	K04F10.6a	1135	2	403	547	no	1	15	1338	MTNDKHHGEKFNWKSYKLSVLTYKMMNRSIQELIGNMESSSFKLKFKF
K04F10.6	K04F10.6b	1137	2	403	547	no	1	15	1029	MTNDKHHGEKFNWKSYKLSVLTYKMMNRSIQELIGNMESSSFKLKFKF
K04F10.6	K04F10.6b	1138	3	1118	1409	yes	1	15	1029	MVRSSTNKEVCIQDPFDEHNPGRTVRTLNRIKDVMRSTYQKFLPVEGSEFTFPTLDDIINMSPEVPKPSRAEVRNFRAEATEVNRVGLGVYCRNSFV
F16D3.4	F16D3.4	1140	2	1186	1327	no	1	0	3696	MIMKNIQMNRHFRIKLIVIKVVIMKLIKKINGTMETNWKTRKLLNSL
F16D3.4	F16D3.4	1141	2	1822	1945	no	1	0	3696	MCHMEFLSSNRLIILLLQIVKNVMNIYVFQLLSIQRILLLF
F16D3.4	F16D3.4	1142	2	340	469	no	1	0	3696	MNVMRQPRRLIIYDILDFCTYIKNNHVYLTNGFQKLWRIWSIW
K07A1.9	K07A1.9a	1144	1	1065	1320	no	3	5	1460	MQFIRISSITIWDTTFTRVQKCATRLNFAQVIFFVTNRFDGLILIHVVISLMAQLAQMAFLSSVQELLVQLLQLLILFSCSLTDQ
K07A1.9	K07A1.9a	1145	1	741	861	no	3	5	1460	MNLEQEITNHSNCTKITSILFTKTKTVDLPVFVDSSVILH
K07A1.9	K07A1.9c	1147	1	276	570	no	3	5	341	MTVNDYSGLLDVGWRRSGRYLYKPDNRVTCCPQYTIRLDVTKFKMSRSQKRAMRQMNEFLATGKRPVCGIKEEDAPVEMNLKGSGSQSEQSKKNLKSH
K07A1.9	K07A1.9b	1149	1	981	1236	no	3	5	1376	MQFIRISSITIWDTTFTRVQKCATRLNFAQVIFFVTNRFDGLILIHVVISLMAQLAQMAFLSSVQELLVQLLQLLILFSCSLTDQ
K07A1.9	K07A1.9b	1150	1	657	777	no	3	5	1376	MNLEQEITNHSNCTKITSILFTKTKTVDLPVFVDSSVILH
Y47G6A.5	Y47G6A.5b	1152	2	1480	1801	no	1	60	1782	MNRFSTQKPTSGRTEFFSGRLELLEKHHIEDGITREHLNICHVDMCCHVLNWFRITCTRMRSKFVSTWIRGAVRRSIDCSSILMRSTVKVSHHSVSPHLVTDSHIYP
Y47G6A.5	Y47G6A.5b	1153	2	262	397	no	1	60	1782	MELHFLLDQFQKHIHIMAQQSAHIQNLKRKCSLWRTASWHRLRKK
Y47G6A.5	Y47G6A.5b	1154	2	415	610	no	1	60	1782	MYSILLSRATENGGTWQVSPDNSKVLSQNPMWSMPNTESHGSLEIYHQFWQNRGSCNRNYQSDLF
Y47G6A.5	Y47G6A.5b	1155	3	533	665	yes	1	60	1782	MVRWKYIINSGRTEGHATATTNRIFFDSGKFENRHICASCQKFS
Y47G6A.5	Y47G6A.5a	1157	2	1552	1873	no	1	0	1854	MNRFSTQKPTSGRTEFFSGRLELLEKHHIEDGITREHLNICHVDMCCHVLNWFRITCTRMRSKFVSTWIRGAVRRSIDCSSILMRSTVKVSHHSVSPHLVTDSHIYP
Y47G6A.5	Y47G6A.5a	1158	2	334	469	no	1	0	1854	MELHFLLDQFQKHIHIMAQQSAHIQNLKRKCSLWRTASWHRLRKK
Y47G6A.5	Y47G6A.5a	1159	2	487	682	no	1	0	1854	MYSILLSRATENGGTWQVSPDNSKVLSQNPMWSMPNTESHGSLEIYHQFWQNRGSCNRNYQSDLF
Y47G6A.5	Y47G6A.5a	1160	3	605	737	yes	1	0	1854	MVRWKYIINSGRTEGHATATTNRIFFDSGKFENRHICASCQKFS
Y39G10AR.2	Y39G10AR.2a	1162	2	772	955	no	1	3	1893	MCGGAQRVLWSFWSIQTMRPTARSKLIWDGEISDSLSMMRSLSSSFSFSTSLMFSQIRITR
Y39G10AR.2	Y39G10AR.2a	1163	2	988	1225	no	1	3	1893	MISFKKWMLLSKRARARIMFLCRMRISEVEISLTKCGTLFASVMTSSRSLCSSETSFKLWPTEKSSLTRKSGTRVISLH
Y39G10AR.2	Y39G10AR.2a	1164	2	421	655	no	1	3	1893	MQIQFHSRTGCLFRDTSASTAPSIFRRQSRHCPCGSPRPARNSHRFAGSPPAAPIETCNSPRRPVFSAISTMRIVRGW
Y39G10AR.2	Y39G10AR.2b	1166	2	772	955	no	1	3	1887	MCGGAQRVLWSFWSIQTMRPTARSKLIWDGEISDSLSMMRSLSSSFSFSTSLMFSQIRITR
Y39G10AR.2	Y39G10AR.2b	1167	2	988	1219	no	1	3	1887	MISFKKWMLLSKRARARIMFLCRMRKVEISLTKCGTLFASVMTSSRSLCSSETSFKLWPTEKSSLTRKSGTRVISLH
Y39G10AR.2	Y39G10AR.2b	1168	2	421	655	no	1	3	1887	MQIQFHSRTGCLFRDTSASTAPSIFRRQSRHCPCGSPRPARNSHRFAGSPPAAPIETCNSPRRPVFSAISTMRIVRGW
K07A12.6	K07A12.6	1171	3	206	335	no	2	19	559	MHQLKHAIQHVSLFSNHSILEVYNPCNVHFYTSVVVLITYFLQ
Y71A12C.1	Y71A12C.1	1174	2	820	943	no	1	0	1020	MHHVYSTIVVCKIPSLHLPDSPNCYQFGSLSSKLSKISAIL
Y71A12C.1	Y71A12C.1	1175	3	803	986	no	1	0	1020	MYSENVCIMSTPLLLSAKFQVCTCQIHRIVINLDRYPPNFQKFQPFCDSSPAYRQRNGFFE
M04F3.4	M04F3.4a	1177	1	312	513	no	3	23	539	MLSHNLDTVSLHNSTTSLCTNSTDPTVIESISTILSNFASFFRPSLLPSETSTRTAMESSPSATSSS
M04F3.4	M04F3.4a	1178	1	186	306	no	3	23	539	METAQSIFKNSRLCGDISTTGQTVSVVLIPMVREILIRVS
M04F3.4	M04F3.4a	1179	2	130	268	yes	3	23	539	MEPIQSGNLPFNDRNVRLEWRRRNQFSRIPGSVEIYQRLDKLFPWF
M04F3.4	M04F3.4b	1181	1	312	513	no	3	23	539	MLSHNLDTVSLHNSTTSLCTNSTDPTVIESISTILSNFASFFRPSLLPSETSTRTAMESSPSATSSS
M04F3.4	M04F3.4b	1182	1	186	306	no	3	23	539	METAQSIFKNSRLCGDISTTGQTVSVVLIPMVREILIRVS
M04F3.4	M04F3.4b	1183	2	130	268	yes	3	23	539	MEPIQSGNLPFNDRNVRLEWRRRNQFSRIPGSVEIYQRLDKLFPWF
Y34D9A.7	Y34D9A.7	1185	2	103	286	no	1	0	1242	MRIWRGKHHQLMMMRKLKLVVIGRKICGKECLGNSATSPKNRKKSVAVQIVASTAAAAITL
C15A11.7	C15A11.7a	1189	3	29	182	no	2	10	1198	MNRQELGLGVKSIFLKVNNLTRNMLKRLQTFLLIQHLLITFLSSIESLSLC
C15A11.7	C15A11.7a	1190	3	461	608	no	2	10	1198	MNDQLYLASQEPYQVSFSESIALILSSPELKRKCSLFLFGHHLHLLSEF
W02D3.5	W02D3.5.2	1192	3	224	458	no	2	10	415	MRPLQMAVPSSQLSTSRTENSFTFKRRSRTLIRNQLSPVGSKETSLSLLLNLDPLFLAASTFANRFSIPNMSFVLVFL
W02D3.5	W02D3.5.1	1194	2	226	460	no	1	12	417	MRPLQMAVPSSQLSTSRTENSFTFKRRSRTLIRNQLSPVGSKETSLSLLLNLDPLFLAASTFANRFSIPNMSFVLVFL
R06C7.8	R06C7.8	1196	2	442	574	no	1	6	2967	MNTSMENLEICSHDRMRLWIFSDSMRVLRKSVALRFAFCNTMCL
R06C7.8	R06C7.8	1197	2	1852	1975	no	1	6	2967	MKFQISLKTTNLKSLVARFVGAVKLSSKETSIHGTKLFEKN
R06C7.8	R06C7.8	1198	2	1516	1708	no	1	6	2967	MIFMTMKSSLAFSNRLVVISSHRPPHKEFIWSTLMNISEIKRRKALTNRKLQYLLLQPAVLSVN
R06C7.8	R06C7.8	1199	3	2174	2306	no	1	6	2967	MFVGSVHLRPNAESPERSRFGADGQMLHYGSDGCLCLFNCFASC
F36F2.2	F36F2.2	1201	2	619	829	no	1	0	870	MMSMVRRKNYLFGGKKSPRRLIHHLNIVITRRRPFTCILKWISKMLENLCGISNAHELMLLLLQLLNWTE
F36F2.2	F36F2.2	1202	2	325	448	no	1	0	870	MKWLQAGHHLKYQLMKWKMWIFSRNRGIDTCQLLLWKVWQD
F36F2.2	F36F2.2	1203	2	31	169	no	1	0	870	MSHVNLQFVSRLFVNPVLLRSSITGKSQNLDVHQRLYHARKPPTTM
F54C1.2	F54C1.2.2	1205	1	699	822	no	3	14	1193	MQLYFGMIFKLINVLILKKGQLGYSIREKLIVWIDTEICSS
F54C1.2	F54C1.2.2	1206	2	880	1054	no	3	14	1193	MVASIIIGQRRSHHRRTSNTGRPRQIVDVTAYPRDPTASLMEFQSRLRVSLHNFHLYS
F54C1.2	F54C1.2.1	1208	1	798	921	no	3	113	1292	MQLYFGMIFKLINVLILKKGQLGYSIREKLIVWIDTEICSS
F54C1.2	F54C1.2.1	1209	2	979	1153	no	3	113	1292	MVASIIIGQRRSHHRRTSNTGRPRQIVDVTAYPRDPTASLMEFQSRLRVSLHNFHLYS
F58D5.4	F58D5.4a	1211	2	1033	1201	no	1	18	1668	MNNYPKISINRGHFKFRCKFVRQCLICIKRRYFIEIYERKIFFWTIRIESLLRILR
F58D5.4	F58D5.4a	1212	2	1321	1585	no	1	18	1668	MCCFNMNYRFHKNLMFIRLVQFSSNSCSAVCQRAVTLGIRSSTRKCAAKKRHFNGSTPSCKKSTENCTNCCWNAGRANRRSGRVSNKL
F58D5.4	F58D5.4a	1213	2	187	439	no	1	18	1668	MHHRLLPRHHHLYFRLRHQNHRHRLLRHREYRFIIKWCRASQNFGNVTFVSTYLYSILYGNSIWTMSTRVMFVESVFTKDAWIV
F58D5.4	F58D5.4c.2	1215	1	990	1158	no	3	251	1625	MNNYPKISINRGHFKFRCKFVRQCLICIKRRYFIEIYERKIFFWTIRIESLLRILR
F58D5.4	F58D5.4c.2	1216	1	144	396	no	3	251	1625	MHHRLLPRHHHLYFRLRHQNHRHRLLRHREYRFIIKWCRASQNFGNVTFVSTYLYSILYGNSIWTMSTRVMFVESVFTKDAWIV
F58D5.4	F58D5.4c.2	1217	1	1278	1542	no	3	251	1625	MCCFNMNYRFHKNLMFIRLVQFSSNSCSAVCQRAVTLGIRSSTRKCAAKKRHFNGSTPSCKKSTENCTNCCWNAGRANRRSGRVSNKL
F58D5.4	F58D5.4b	1219	3	911	1079	no	2	16	1546	MNNYPKISINRGHFKFRCKFVRQCLICIKRRYFIEIYERKIFFWTIRIESLLRILR
F58D5.4	F58D5.4b	1220	3	1199	1463	no	2	16	1546	MCCFNMNYRFHKNLMFIRLVQFSSNSCSAVCQRAVTLGIRSSTRKCAAKKRHFNGSTPSCKKSTENCTNCCWNAGRANRRSGRVSNKL
F58D5.4	F58D5.4b	1221	3	173	425	no	2	16	1546	MHHRLLPRHHHLYFRLRHQNHRHRLLRHREYRFIIKWCRASQNFGNVTFVSTYLYSILYGNSIWTMSTRVMFVESVFTKDAWIV
F58D5.4	F58D5.4c.1	1223	3	1205	1469	no	2	178	1552	MCCFNMNYRFHKNLMFIRLVQFSSNSCSAVCQRAVTLGIRSSTRKCAAKKRHFNGSTPSCKKSTENCTNCCWNAGRANRRSGRVSNKL
F58D5.4	F58D5.4c.1	1224	3	71	323	no	2	178	1552	MHHRLLPRHHHLYFRLRHQNHRHRLLRHREYRFIIKWCRASQNFGNVTFVSTYLYSILYGNSIWTMSTRVMFVESVFTKDAWIV
F58D5.4	F58D5.4c.1	1225	3	917	1085	no	2	178	1552	MNNYPKISINRGHFKFRCKFVRQCLICIKRRYFIEIYERKIFFWTIRIESLLRILR
K07G5.6	K07G5.6.1	1227	1	1071	1206	no	3	56	1178	MEYRRSSKIYCSDGRINNWKWPAQRDSCRISTYFCIESFETIKRV
K07G5.6	K07G5.6.1	1228	1	648	813	no	3	56	1178	MMYLQFGDGIIIQFWQIIGRRKSRKSFRNWMVLFSQLLESLPAITDQFLRLVNEP
K07G5.6	K07G5.6.2	1230	2	1042	1177	no	1	27	1149	MEYRRSSKIYCSDGRINNWKWPAQRDSCRISTYFCIESFETIKRV
K07G5.6	K07G5.6.2	1231	2	619	784	no	1	27	1149	MMYLQFGDGIIIQFWQIIGRRKSRKSFRNWMVLFSQLLESLPAITDQFLRLVNEP
F27D4.1	F27D4.1.2	1234	3	95	218	no	2	7	1003	MRQSLLQSLSMLSLLLLNSEMKYLSSSLEPTQQRLLNKLQK
F27D4.1	F27D4.1.2	1235	3	1451	1721	no	2	7	1003	MMKLMGWNNKEIDKKVRRSREHYENFILKWTAIEKKRNNEYLKRKVGPVLECEKAKHKNNIFQKRKNGSRGQPPPKKEDFERMRDYTIYR
F27D4.1	F27D4.1.1	1237	1	93	216	no	3	5	1001	MRQSLLQSLSMLSLLLLNSEMKYLSSSLEPTQQRLLNKLQK
F27D4.1	F27D4.1.1	1238	1	1449	1719	no	3	5	1001	MMKLMGWNNKEIDKKVRRSREHYENFILKWTAIEKKRNNEYLKRKVGPVLECEKAKHKNNIFQKRKNGSRGQPPPKKEDFERMRDYTIYR
H26D21.2	H26D21.2.3	1240	1	1908	2040	no	2	16	2563	MSLDHSHRSQHGWKEHLPPISSSFHSSRPNRIVRSMLLRYNFGR
H26D21.2	H26D21.2.3	1241	3	1301	1463	no	2	16	2563	MSSSISTMRRRTKRFVFASILFQRSRRLVRSWSKWRESRRSCARNIPRNSNATI
H26D21.2	H26D21.2.3	1242	3	704	830	no	2	16	2563	MKPKNKTKTSRNAFKFYTRTQPMNTVFLRSIVFSITELMEIC
H26D21.2	H26D21.2.3	1243	3	2042	2162	no	2	16	2563	MGFSHELVHPTSNRKEFPHLWLKCSIALRFFKEPLRIHSW
H26D21.2	H26D21.2.3	1244	3	2279	2621	no	2	16	2563	MRWENSLNSRELLPFKWEFKSRIMKFTCSTRFSRELHSAPSASKLPKWLESMKMSLIKRPNFWKASRRSLSSIARRRRNFSNQQISDKPFSALSNNSISYFIFLQFTYFVLNCE
H26D21.2	H26D21.2.1	1246	1	702	828	no	3	14	2561	MKPKNKTKTSRNAFKFYTRTQPMNTVFLRSIVFSITELMEIC
H26D21.2	H26D21.2.1	1247	1	2040	2160	no	3	14	2561	MGFSHELVHPTSNRKEFPHLWLKCSIALRFFKEPLRIHSW
H26D21.2	H26D21.2.1	1248	1	2277	2619	no	3	14	2561	MRWENSLNSRELLPFKWEFKSRIMKFTCSTRFSRELHSAPSASKLPKWLESMKMSLIKRPNFWKASRRSLSSIARRRRNFSNQQISDKPFSALSNNSISYFIFLQFTYFVLNCE
H26D21.2	H26D21.2.1	1249	1	1299	1461	no	3	14	2561	MSSSISTMRRRTKRFVFASILFQRSRRLVRSWSKWRESRRSCARNIPRNSNATI
H26D21.2	H26D21.2.1	1250	2	1906	2038	no	3	14	2561	MSLDHSHRSQHGWKEHLPPISSSFHSSRPNRIVRSMLLRYNFGR
H26D21.2	H26D21.2.2	1252	1	1908	2040	no	2	16	2563	MSLDHSHRSQHGWKEHLPPISSSFHSSRPNRIVRSMLLRYNFGR
H26D21.2	H26D21.2.2	1253	3	1301	1463	no	2	16	2563	MSSSISTMRRRTKRFVFASILFQRSRRLVRSWSKWRESRRSCARNIPRNSNATI
H26D21.2	H26D21.2.2	1254	3	704	830	no	2	16	2563	MKPKNKTKTSRNAFKFYTRTQPMNTVFLRSIVFSITELMEIC
H26D21.2	H26D21.2.2	1255	3	2042	2162	no	2	16	2563	MGFSHELVHPTSNRKEFPHLWLKCSIALRFFKEPLRIHSW
H26D21.2	H26D21.2.2	1256	3	2279	2621	no	2	16	2563	MRWENSLNSRELLPFKWEFKSRIMKFTCSTRFSRELHSAPSASKLPKWLESMKMSLIKRPNFWKASRRSLSSIARRRRNFSNQQISDKPFSALSNNSISYFIFLQFTYFVLNCE
T22H2.6	T22H2.6a	1258	2	784	934	no	1	0	1074	MMMMRNPRHQRIQKAMWTRLPVELERRVQQKPRAVMSEERMGSRRRCVVH
T22H2.6	T22H2.6a	1259	2	319	475	no	1	0	1074	MKLAVSSETTRGDAARCRMPCAVTIGPIAVQQGPLVIHKELDALELTRSMFQ
T22H2.6	T22H2.6a	1260	2	523	703	no	1	0	1074	MKSSARTRLASAQMVRRAVCWSREATDVARCRMRCAAQICCTAVRMDLRVTGSFARRISP
T22H2.6	T22H2.6a	1261	3	602	785	no	1	0	1074	MLPGAECGVLRRYVALLSEWIYVSRAVLLAEFRHDPTPAEVRLHLHPSQASSGVPFRRRGG
T22H2.6	T22H2.6b	1263	2	784	934	no	1	0	1035	MMMMRNPRHQRIQKAMWTRLPVELERRVQQKPRAVMSEERMGSRRRCVVH
T22H2.6	T22H2.6b	1264	2	319	475	no	1	0	1035	MKLAVSSETTRGDAARCRMPCAVTIGPIAVQQGPLVIHKELDALELTRSMFQ
T22H2.6	T22H2.6b	1265	2	523	703	no	1	0	1035	MKSSARTRLASAQMVRRAVCWSREATDVARCRMRCAAQICCTAVRMDLRVTGSFARRISP
T22H2.6	T22H2.6b	1266	3	602	785	no	1	0	1035	MLPGAECGVLRRYVALLSEWIYVSRAVLLAEFRHDPTPAEVRLHLHPSQASSGVPFRRRGG
Y95B8A.10	Y95B8A.10b	1269	2	1900	2131	no	1	0	2091	MCRRSNVTRIHLRYVICLSSAPTSPIRRESGDCVSDGRIGLLRSTLNRCVGRGRAAIAGLPEMLREIFLIRRKHIFF
Y95B8A.10	Y95B8A.10b	1270	2	1423	1579	no	1	0	2091	MCSAAPTISSTVGFYPSRLITMRETRITTQLTQPTSYRPPHSSWTPRRSPCT
Y95B8A.10	Y95B8A.10b	1271	3	782	908	no	1	0	2091	MHTIRGDRTTRIGNATKVPAEGTWRRGAAAELRLEIYTGPVC
Y95B8A.10	Y95B8A.10b	1272	3	2318	2495	no	1	0	2091	MGGHTHREHTVAGKLGTSVICRFADLPEVFYSGKLTICRFAGKNRLLLTPGVEIKINKX
Y95B8A.10	Y95B8A.10b	1273	3	2156	2282	no	1	0	2091	MAPLDFDRLYLGCLLSYFKNSNDKIFFKSIVILWFLKISKNF
Y95B8A.10	Y95B8A.10b	1274	3	440	623	no	1	0	2091	MPFSCIHRSSSTSSIANRQRRLIGEHRGGVDCVDRRETHQRKATESSCAVQHHSSCDVEYA
Y95B8A.10	Y95B8A.10a	1276	2	1900	2074	no	1	0	2280	MCRRSNVTRIHLRYVICLSSAPTSPIRRESGDCVSDGRIGLLRSTLNRLEKKKRKGCL
Y95B8A.10	Y95B8A.10a	1277	2	1423	1579	no	1	0	2280	MCSAAPTISSTVGFYPSRLITMRETRITTQLTQPTSYRPPHSSWTPRRSPCT
Y95B8A.10	Y95B8A.10a	1278	3	782	908	no	1	0	2280	MHTIRGDRTTRIGNATKVPAEGTWRRGAAAELRLEIYTGPVC
Y95B8A.10	Y95B8A.10a	1279	3	440	623	no	1	0	2280	MPFSCIHRSSSTSSIANRQRRLIGEHRGGVDCVDRRETHQRKATESSCAVQHHSSCDVEYA
B0511.11	B0511.11	1282	2	1375	1516	no	1	0	1695	MNGNLKPKSKRMESTGSVFSSRIQSTNHLKMDQKTLLEISAVEIVVF
B0511.11	B0511.11	1283	2	217	574	no	1	0	1695	MIQMKHQLFWKRLMVPVSRWYTFYLKSQRFGRLRRKRLGLENTRSNEQKRNRWKRVTNRKPRSNLNQRRRQKLRKRVKLYPFHLHHLLPLINLLKLQRKEVLQKKPKNLPIQIWCKKKI
F25F8.1	F25F8.1.2	1286	1	1899	2064	no	2	10	1900	MNWSEVEFPFIKGKISVYNTFFGISTRAYRHHIVCLDGIFLSYESLELIIFYVPF
F25F8.1	F25F8.1.2	1287	3	1754	1910	no	2	10	1900	MFSTWLYSIVVKYSVHDIWTMEYLNQQLQLESHLLQYNNDEAVVFREVHELV
F25F8.1	F25F8.1.1	1289	2	1756	1912	no	1	12	1902	MFSTWLYSIVVKYSVHDIWTMEYLNQQLQLESHLLQYNNDEAVVFREVHELV
F25F8.1	F25F8.1.1	1290	3	1901	2066	no	1	12	1902	MNWSEVEFPFIKGKISVYNTFFGISTRAYRHHIVCLDGIFLSYESLELIIFYVPF
F52A8.3	F52A8.3b	1292	2	166	382	no	1	0	378	MIIFLVMLIIFNTLVKLHVKSTWTHHQEILKYLVSWFLVIRSCSLLKIVIIPRRRLRQLLTDLMPTMFLDIX
F52A8.3	F52A8.3a	1294	2	199	415	no	1	0	411	MIIFLVMLIIFNTLVKLHVKSTWTHHQEILKYLVSWFLVIRSCSLLKIVIIPRRRLRQLLTDLMPTMFLDIX
C12C8.3	C12C8.3b.1	1296	2	2173	2326	no	1	195	3624	MKTIDSNSQLHRMEFFLTKLDNSEILRVGHVPRIVQLSETLLKKRFVSVKQ
C12C8.3	C12C8.3b.1	1297	2	1765	1942	no	1	195	3624	MRVNYCNGNVRRLVILSSRLSMELLQMQRPLKTRFEPLSIHTSTLWRNDERNYSRGWRQ
C12C8.3	C12C8.3b.1	1298	2	2332	2500	no	1	195	3624	MCNSAMHVEICCLHRLLQLNQHPKHFFLIKNHIPIWNKLCQLLMYRLLSFHQMDQL
C12C8.3	C12C8.3b.1	1299	2	1498	1636	no	1	195	3624	MLEDQFVKHLDQLEVEMDMCLALKMIQLAVENHHLEALLCVELMIQ
C12C8.3	C12C8.3b.1	1300	3	1304	1424	no	1	195	3624	MSRMRIENIVRLLYAMSGSFVYSLCSSSSACSSHQTTCVR
C12C8.3	C12C8.3b.1	1301	3	605	770	no	1	195	3624	MLPDDTVLVRSTGLQAVWCRIDSHRQLYIADVPVSDASITATWSSDVGLFDTNDE
C12C8.3	C12C8.3a.1	1303	2	1498	1648	no	1	195	3636	MLEDQFVKHLDQLEVEMFSFQDMCLALKMIQLAVENHHLEALLCVELMIQ
C12C8.3	C12C8.3a.1	1304	2	2185	2338	no	1	195	3636	MKTIDSNSQLHRMEFFLTKLDNSEILRVGHVPRIVQLSETLLKKRFVSVKQ
C12C8.3	C12C8.3a.1	1305	2	1777	1954	no	1	195	3636	MRVNYCNGNVRRLVILSSRLSMELLQMQRPLKTRFEPLSIHTSTLWRNDERNYSRGWRQ
C12C8.3	C12C8.3a.1	1306	2	2344	2512	no	1	195	3636	MCNSAMHVEICCLHRLLQLNQHPKHFFLIKNHIPIWNKLCQLLMYRLLSFHQMDQL
C12C8.3	C12C8.3a.1	1307	3	1304	1424	no	1	195	3636	MSRMRIENIVRLLYAMSGSFVYSLCSSSSACSSHQTTCVR
C12C8.3	C12C8.3a.1	1308	3	605	770	no	1	195	3636	MLPDDTVLVRSTGLQAVWCRIDSHRQLYIADVPVSDASITATWSSDVGLFDTNDE
C12C8.3	C12C8.3b.2	1310	1	1245	1365	no	2	136	3565	MSRMRIENIVRLLYAMSGSFVYSLCSSSSACSSHQTTCVR
C12C8.3	C12C8.3b.2	1311	1	546	711	no	2	136	3565	MLPDDTVLVRSTGLQAVWCRIDSHRQLYIADVPVSDASITATWSSDVGLFDTNDE
C12C8.3	C12C8.3b.2	1312	3	1439	1577	no	2	136	3565	MLEDQFVKHLDQLEVEMDMCLALKMIQLAVENHHLEALLCVELMIQ
C12C8.3	C12C8.3b.2	1313	3	2273	2441	no	2	136	3565	MCNSAMHVEICCLHRLLQLNQHPKHFFLIKNHIPIWNKLCQLLMYRLLSFHQMDQL
C12C8.3	C12C8.3b.2	1314	3	2114	2267	no	2	136	3565	MKTIDSNSQLHRMEFFLTKLDNSEILRVGHVPRIVQLSETLLKKRFVSVKQ
C12C8.3	C12C8.3b.2	1315	3	1706	1883	no	2	136	3565	MRVNYCNGNVRRLVILSSRLSMELLQMQRPLKTRFEPLSIHTSTLWRNDERNYSRGWRQ
C12C8.3	C12C8.3a.2	1317	1	1245	1365	no	2	136	3577	MSRMRIENIVRLLYAMSGSFVYSLCSSSSACSSHQTTCVR
C12C8.3	C12C8.3a.2	1318	1	546	711	no	2	136	3577	MLPDDTVLVRSTGLQAVWCRIDSHRQLYIADVPVSDASITATWSSDVGLFDTNDE
C12C8.3	C12C8.3a.2	1319	3	2126	2279	no	2	136	3577	MKTIDSNSQLHRMEFFLTKLDNSEILRVGHVPRIVQLSETLLKKRFVSVKQ
C12C8.3	C12C8.3a.2	1320	3	2285	2453	no	2	136	3577	MCNSAMHVEICCLHRLLQLNQHPKHFFLIKNHIPIWNKLCQLLMYRLLSFHQMDQL
C12C8.3	C12C8.3a.2	1321	3	1439	1589	no	2	136	3577	MLEDQFVKHLDQLEVEMFSFQDMCLALKMIQLAVENHHLEALLCVELMIQ
C12C8.3	C12C8.3a.2	1322	3	1718	1895	no	2	136	3577	MRVNYCNGNVRRLVILSSRLSMELLQMQRPLKTRFEPLSIHTSTLWRNDERNYSRGWRQ
F48C1.8	F48C1.8	1324	1	600	789	yes	3	248	749	MGIMDIQTMDIPVECLNLLIMSVEFQDSTVIAHRTRQIINGISAVRCIVDKSSFQFFKINLLF
F48C1.8	F48C1.8	1325	1	318	561	yes	3	248	749	MAAGIMEVTIMEATTMGDMTTGGMIMEVGVVMIIMIIIMVDGEDMIMTMETEVEVVITDGDIDHLLDLEEEIITEVGVVVF
VH15N14R.1	VH15N14R.1	1327	2	280	487	yes	1	0	591	MDSNGTIGISGQDGSRWRMDDDDDDDDDEGWIGMDRDGSRWIEVDRDGSRWIGMDRDGSGWMDREDRNV
VH15N14R.1	VH15N14R.1	1328	3	272	596	yes	1	0	591	MERWTRMEQSGSADRMDQDGGWTTTTTTTTTKDGSGWIGMDRGGSRWIGMDRGGSGWIGMDRDGWIGRIGMYERIGTKQRWKSERSENDANQRDRKERNGKAGFYTLX
Y71G12B.1	Y71G12B.1a	1330	1	555	690	no	2	7	1474	MLGSERKIHRHNVPRQKNGFNRRGPWRPSETLLLRTPSLNDYPVG
Y71G12B.1	Y71G12B.1b.2	1332	3	551	686	no	1	9	1470	MLGSERKIHRHNVPRQKNGFNRRGPWRPSETLLLRTPSLNDYPVG
Y71G12B.1	Y71G12B.1b.1	1334	1	549	684	no	2	7	1468	MLGSERKIHRHNVPRQKNGFNRRGPWRPSETLLLRTPSLNDYPVG
F07A5.2	F07A5.2	1337	2	94	469	no	1	63	993	MRQILSHHFSLQLVVLMMENLILHSCQLELLHHQAVVLVLIRSFQLLVPVNQDQELKASFLVARRLDSREQDLKDLFQAKDRKLETLLGTVTRFRKVLEEDFCKLKLRVDAIDPTNHQVPVVKAF
W02D9.4	W02D9.4	1339	2	658	805	no	1	0	738	MVLKSNQKWIVRSKSSWRSRSRNPCFYKLHIIPDIIYIRFLPDSNSTFX
W02D9.4	W02D9.4	1340	2	151	355	yes	1	0	738	MEQFVDIRLRAQKVLDHQVLKNVKCQNQRKMLCLVVVVRSVDWVKFLSKMGLVQNFQKRLYANCVSIG
Y18H1A.10	Y18H1A.10	1342	1	1317	1521	no	1	0	1302	MIMKINPRDSKIFIHFRENFISSLYFLTRLRDVPFFLFSGIFGISLFFPSPPDSKPKPKPKFKARPKP
Y18H1A.10	Y18H1A.10	1343	2	907	1045	no	1	0	1302	MELRSILLISHLAAFRKIRQLSTGIWKRIRRFLKDQMLHNLKYIER
Y18H1A.10	Y18H1A.10	1344	2	649	820	no	1	0	1302	MFILQNIKTLSFSSRQMVESRWQILSLKVKMNYFPSFTSSFSQWLQLKQLLNSSTGT
Y18H1A.10	Y18H1A.10	1345	3	419	584	no	1	0	1302	MFLWKSIRGNSNNPRRFVRGDCDEGTVGVERPKFLEFYAEFYRNDFSPNSHGGIS
B0414.5	B0414.5	1347	1	1788	1920	yes	3	29	2264	MDLTILKSIIRFLIFLRQVSLSSSAHLHKHCQLSMDIFKMVNNC
B0414.5	B0414.5	1348	1	1128	1311	no	3	29	2264	MNALLLLYFTNVLKRLEEPENGTLRFELKDRNRPRYGRYKSFHGLPRTLCFVRMIHFSKQE
B0414.5	B0414.5	1349	1	336	513	no	3	29	2264	MNPLRRLLIAYSKRLYHLAGHQQSIRIRRIECIFLDLQELQRSLSTRKEIHSVRNLLGD
B0414.5	B0414.5	1350	1	831	960	yes	3	29	2264	MEIKTVIATQLGLESFRPEIIQVQHSHGRYLLEEFHGISLRQL
B0414.5	B0414.5	1351	2	1000	1123	no	3	29	2264	MAWTRSTLSQWTIKFGSVKWEFESSNEVYWTSCYWVRLHDI
B0414.5	B0414.5	1352	2	2551	2677	no	3	29	2264	MPFFLVIRNQFVCHFLGPICRFKLSALRFTSLSFNVYKKNRR
K04F10.2	K04F10.2	1354	2	406	526	no	1	0	1704	MHQEFMLKLASVTLKCIWMELGYFEENLNVHSPLILSLHL
T22C1.9	T22C1.9	1356	3	431	641	no	2	16	601	MMIIRRKMFMVIKRMIIKIETMEDEILMLFRWNIILKRNTSRVDLKSWASLSSTSKSSKLSSPSPKNSKC
Y65B4BR.4	Y65B4BR.4a	1359	1	687	882	no	2	16	2398	MGDAFRSIRTQVLRGSHHQEHHVGTPVYSAIATGMGNAKRSERKSVLRGSQHAHDHLATTDSRYA
Y65B4BR.4	Y65B4BR.4a	1360	1	2130	2436	yes	2	16	2398	MGSKSGPRKTCPAPTIRHRNVPCASRWIFRADGLDGTTTILYRACRQGELAPTVAYVLQSTRLAAIQKLRSARREVEHGDRDDGRIWKRVVSRCFFLVLLAA
Y65B4BR.4	Y65B4BR.4a	1361	3	1529	1709	no	2	16	2398	MLVITIIVFKSIQLHLLTRIILSISSILDDSLPWRYSTGNSSTAVSRCHSTKRCSTRRLF
Y65B4BR.4	Y65B4BR.4a	1362	3	539	1046	no	2	16	2398	MALPRHPRRGDRRQRSVTLWRLQRVPQRRQQQQQQAAPRPPEQKNSFPMDGRCVSINTDASTTWITPPRAPRGNARLLSHCHRDGKCEEIREEECITWITTRARPPGNDRQPICLKHTNNGNREEIRRCFNGNNVSFSSRTTLAPTIHSDHCPKDGRSVRIRIRRECTL
Y65B4BR.4	Y65B4BR.4a	1363	3	1124	1502	no	2	16	2398	MVGKCDSPSKAFHSSSITSLKPPPIMIQEPENPSARSASSVFKWPWRRVSGGKLHNSDIYACQTVCLIMSKSQYPVITCSKTHSKKLCVKMQSIYAGGCTFNSEAKRVSTMEVSPENGSSCCRTKC
Y65B4BR.4	Y65B4BR.4a	1364	3	1778	2114	no	2	16	2398	MNAIWSSILLPITSCSASSRLMSLRRAVQRLLLPRRISLNTSNCSLSGASIAVSNNRQKPSSPASTRSSRWNGCSISMKESSSCCSAECRTLMWTIGREILSTDIMLHRASR
Y65B4BR.4	Y65B4BR.4b	1366	1	687	882	no	2	16	2392	MGDAFRSIRTQVLRGSHHQEHHVGTPVYSAIATGMGNAKRSERKSVLRGSQHAHDHLATTDSRYA
Y65B4BR.4	Y65B4BR.4b	1367	1	2124	2430	yes	2	16	2392	MGSKSGPRKTCPAPTIRHRNVPCASRWIFRADGLDGTTTILYRACRQGELAPTVAYVLQSTRLAAIQKLRSARREVEHGDRDDGRIWKRVVSRCFFLVLLAA
Y65B4BR.4	Y65B4BR.4b	1368	3	1772	2108	no	2	16	2392	MNAIWSSILLPITSCSASSRLMSLRRAVQRLLLPRRISLNTSNCSLSGASIAVSNNRQKPSSPASTRSSRWNGCSISMKESSSCCSAECRTLMWTIGREILSTDIMLHRASR
Y65B4BR.4	Y65B4BR.4b	1369	3	1523	1703	no	2	16	2392	MLVITIIVFKSIQLHLLTRIILSISSILDDSLPWRYSTGNSSTAVSRCHSTKRCSTRRLF
Y65B4BR.4	Y65B4BR.4b	1370	3	539	1046	no	2	16	2392	MALPRHPRRGDRRQRSVTLWRLQRVPQRRQQQQQQAAPRPPEQKNSFPMDGRCVSINTDASTTWITPPRAPRGNARLLSHCHRDGKCEEIREEECITWITTRARPPGNDRQPICLKHTNNGNREEIRRCFNGNNVSFSSRTTLAPTIHSDHCPKDGRSVRIRIRRECTL
Y65B4BR.4	Y65B4BR.4b	1371	3	1118	1496	no	2	16	2392	MVGKCDSPSKAFHSSSITSLKPPPIMIQEPENPSARSASSVFKWPWRRVSGGKLHNSDIYACQTVCLIMSKSQYPVITCSKTHSKKLCVKMQSIYAGGCTFNSEAKRVSTMEVSPENGSSCCRTKC
K02B12.4	K02B12.4b	1373	2	505	691	no	1	0	1200	MSRKMIDFRFSMLSVHALIPYKKQKTHQKQKNTQNRHEKKNLQLHMGLMDLHRHRGAHRLIH
K02B12.4	K02B12.4b	1374	2	784	925	no	1	0	1200	MLVIFGVLNVMENPIKEHLKDQIDYLREQTTGFPHYNQREEVQRLQK
K02B12.4	K02B12.4a	1376	3	350	536	no	2	52	1045	MSRKMIDFRFSMLSVHALIPYKKQKTHQKQKNTQNRHEKKNLQLHMGLMDLHRHRGAHRLIH
K02B12.4	K02B12.4a	1377	3	629	770	no	2	52	1045	MLVIFGVLNVMENPIKEHLKDQIDYLREQTTGFPHYNQREEVQRLQK
Y18H1A.8	Y18H1A.8	1379	2	118	262	no	1	0	453	MKTMRCSTTLSVNTITCSIQMHHICISLRLKIPMTDCQSFWIPISSYT
Y18H1A.8	Y18H1A.8	1380	3	389	554	no	1	0	453	MDKRSNRNKGDGDVQDIYFQCLIKLFINIRAYLPTCLQGSLHILFFLINKNIIKT
R119.6	R119.6	1382	2	1330	1462	no	1	0	1569	MLKRKGIEMRMRLQLQHFPVIKLSRINGKTRAPQRQHLVHEQYV
R119.6	R119.6	1383	2	118	310	no	1	0	1569	MLIKWLRNPWKHPRLKTIKCSRLVNLYNSRCSIFSHHRQWLHKGRPGLHKTLQRRPPLLQMTKT
R119.6	R119.6	1384	3	1586	1910	no	1	0	1569	MEKGAKILLFSFSFFKFNFIFPQIKTITFFQSNNNYFSFLNEMLDIKKSFFFSFSAKNFRFFRKNSTTKNWQSAKKPELDIKNTGKIEKNELQFRKLGNFFFKISQKH
T27F6.7	T27F6.7.1	1386	3	173	317	no	2	7	778	MRHGRPPLPLALGSAARSSRLQCSCSNSDGMIMAEVSMRALLLPPSCS
T27F6.7	T27F6.7.2	1388	2	175	319	no	1	9	780	MRHGRPPLPLALGSAARSSRLQCSCSNSDGMIMAEVSMRALLLPPSCS
K04F10.1	K04F10.1	1390	1	231	396	no	2	151	1048	MESCQFSSWHKFNNRTVATCTSSISFSTSTSSSNHCYTTNPGSFANNVLPRGSCN
T01A4.1	T01A4.1d	1392	2	841	985	no	1	0	3714	MILEWRQVVNMYSLISMFQRDHTPNNHGFEQMTRIMRRTRKQKKHIEH
T01A4.1	T01A4.1d	1393	2	1162	1336	no	1	0	3714	MRQFNQVLIHEMDIISRHECGDEHLSELLEMYRLITMVIGIRIILYSIWIPFRIDLWK
T01A4.1	T01A4.1d	1394	3	563	773	no	1	0	3714	METPHFYVSPRKSAVCGRWRMLPSDGKSTASTSKGHGNATQLLHVQRRSRSEYIKSGTAQSISELFASEQ
T01A4.1	T01A4.1a	1396	2	1099	1273	no	1	0	3651	MRQFNQVLIHEMDIISRHECGDEHLSELLEMYRLITMVIGIRIILYSIWIPFRIDLWK
T01A4.1	T01A4.1a	1397	2	778	922	no	1	0	3651	MILEWRQVVNMYSLISMFQRDHTPNNHGFEQMTRIMRRTRKQKKHIEH
T01A4.1	T01A4.1c	1399	3	1271	1445	no	2	31	3859	MRQFNQVLIHEMDIISRHECGDEHLSELLEMYRLITMVIGIRIILYSIWIPFRIDLWK
T01A4.1	T01A4.1c	1400	3	950	1094	no	2	31	3859	MILEWRQVVNMYSLISMFQRDHTPNNHGFEQMTRIMRRTRKQKKHIEH
K05C4.9	K05C4.9	1403	3	1820	1946	no	1	0	2172	MEVRQALPSALNLFDSFESNTARFSKLCESTVEKQLSSTGNK
B0511.9	B0511.9a	1405	2	409	661	no	1	3	582	MIRHSSSTLMIHHSKESMTNLQHPLTLPNLLMLISMLLPAILLQLLEDLLQIHDLTDTNNYWSGLCLGKRAKPAYFNIIIHFLI
B0511.9	B0511.9b	1407	3	440	686	no	2	0	556	MIRHSSSTLMIHHSKESMTNLQHPLTLPNLLMLISMVVNELLEEYCQYFIFSYSRQSYFNFWRTFFKYTISQTLTTTGQGCV
B0511.9	B0511.9c	1409	2	409	664	no	1	3	585	MIRHSSSTLMIHHSKESMTNLQHPLTLPNLLMLISMVLLPAILLQLLEDLLQIHDLTDTNNYWSGLCLGKRAKPAYFNIIIHFLI
B0511.9	B0511.9d	1411	2	385	637	no	1	0	558	MIRHSSSTLMIHHSKESMTNLQHPLTLPNLLMLISMLLPAILLQLLEDLLQIHDLTDTNNYWSGLCLGKRAKPAYFNIIIHFLI
Y106G6H.16	Y106G6H.16	1413	3	365	503	no	1	60	471	MSTMHSFNNNFYPSLSHSLSFLLFAITNTLSSANVVNGFINVQQFV
C45G3.5	C45G3.5	1415	2	1258	1429	no	1	0	1926	MMYLERLQKSIIHSGNISVLLLTSKTFLKCLDNERVSEEMLIIYGIMLLQCFSNVFL
C45G3.5	C45G3.5	1416	2	1621	1765	no	1	0	1926	MLWMLKFRVSSRNGLDTWICLSICIMREFKKQLLWMNTPNVRIFLPVT
H31G24.4	H31G24.4.1	1418	1	1089	1209	no	2	73	1090	MRTILHHPIRSCVLLVSPLHLPSAYIHVLFLFHFPNLRNL
H31G24.4	H31G24.4.1	1419	3	668	797	no	2	73	1090	MTSIQSIRKRSIMCTISPSVSENSHCSIRSCLRFQGRTLLVLR
H31G24.4	H31G24.4.1	1420	3	146	296	no	2	73	1090	MKTDPRRQSIPKVLPLGQEQNWRKSSIAWLKTFTTTLFITRKNMFLTTAS
H31G24.4	H31G24.4.2	1422	1	612	741	no	3	17	1034	MTSIQSIRKRSIMCTISPSVSENSHCSIRSCLRFQGRTLLVLR
H31G24.4	H31G24.4.2	1423	1	90	240	no	3	17	1034	MKTDPRRQSIPKVLPLGQEQNWRKSSIAWLKTFTTTLFITRKNMFLTTAS
H31G24.4	H31G24.4.2	1424	2	1033	1153	no	3	17	1034	MRTILHHPIRSCVLLVSPLHLPSAYIHVLFLFHFPNLRNL
H31B20.1	H31B20.1	1426	3	599	734	no	1	0	543	MTLIFLKSKAKCTSLVRKLSNTKSISYILQFPTQKSKVSIVSFSX
F25H5.2	F25H5.2	1428	2	436	598	no	1	0	696	MKNQEKQELDKECGHLCSSEQQLLNLSFSFWLYSFASSLIRRLFWKLYRIVIMK
F25H5.2	F25H5.2	1429	2	142	394	yes	1	0	696	MESQCHLINHILWLIQRMTFQKKESVVQDVKHFISNFPAQTLMPLYVVILKHRIGILLAELFLDQTRTVLVTLAAILDMFIRCT
ZK849.5	ZK849.5	1431	3	590	776	no	2	37	1270	MTSTFCQSVGLFPLSRTKLIKRIWRTSSQSCGVKSRSGRQSSHFCGTATTSRFRWRTRRLCS
ZK849.5	ZK849.5	1432	3	59	182	no	2	37	1270	MFQLEMLYAIFSKLCSKGKEIYLQRFLKSYVCFLACIFYLW
Y44E3B.1	Y44E3B.1a.1	1434	3	254	437	yes	2	172	1126	MERRRRRPLECSQDKTHLLSPHPSNNVIGNEILWILWKPSWIWIIIYNALPIWMFLRIMST
Y44E3B.1	Y44E3B.1b.2	1436	2	85	268	yes	1	3	888	MERRRRRPLECSQDKTHLLSPHPSNNVIGNEILWILWKPSWIWIIIYNALPIWMFLRIMST
Y44E3B.1	Y44E3B.1b.1	1438	3	254	437	yes	2	172	1057	MERRRRRPLECSQDKTHLLSPHPSNNVIGNEILWILWKPSWIWIIIYNALPIWMFLRIMST
Y44E3B.1	Y44E3B.1a.2	1441	2	85	268	yes	1	3	957	MERRRRRPLECSQDKTHLLSPHPSNNVIGNEILWILWKPSWIWIIIYNALPIWMFLRIMST
W09C3.7	W09C3.7	1443	2	706	886	no	1	324	840	MLKQTDSFSKRMMSLLWISRSKRMDHIRCHRELFSPAKMMSQKLNNSCYGSSEQSNLLFE
W09C3.7	W09C3.7	1444	3	182	305	no	1	324	840	MRINSFQSDNRVTVTSNSSFLLIQFTPCSQFSHSSDFVVIE
Y53H1A.2	Y53H1A.2a.1	1446	2	178	340	no	1	0	633	MSWSTTIIRKMCLKIVHRKINIRPRNLCNKLIIRIYHIFILEIQNFHKKSWKIE
Y53H1A.2	Y53H1A.2a.2	1448	3	179	341	no	2	0	634	MSWSTTIIRKMCLKIVHRKINIRPRNLCNKLIIRIYHIFILEIQNFHKKSWKIE
Y53H1A.2	Y53H1A.2b	1450	2	220	382	no	1	33	675	MSWSTTIIRKMCLKIVHRKINIRPRNLCNKLIIRIYHIFILEIQNFHKKSWKIE
B0041.2	B0041.2b	1455	1	1143	1410	no	3	161	2033	MIIQCGIVHQLEEVNQIVKHVIHSLLNTCNSNNINNNISHTMEVMVIMGCLMVDHCGLLLSWMDPQWYHHIQQWVSDHQLHRHQFQLAC
B0041.2	B0041.2b	1456	1	516	735	no	3	161	2033	MVEINRIIIINNPHLLRRHSQWVEVVEDHKEDHTNSTDQVEIRMEDSEFHHHQWMIIQCGLMRMMKTRKRKNR
B0041.2	B0041.2b	1457	1	360	486	no	3	161	2033	MDNVEIIRINTGIECKEVKVVIEGINRGSSSNSLNRDSICHQ
B0041.2	B0041.2b	1458	1	1911	2040	no	3	161	2033	MEELVQVLHEVVEVVLLVETLLIVVEVVDHLIIIMIIRSLVRC
B0041.2	B0041.2c.1	1460	2	2011	2140	no	1	21	2133	MEELVQVLHEVVEVVLLVETLLIVVEVVDHLIIIMIIRSLVRC
B0041.2	B0041.2c.1	1461	2	622	841	no	1	21	2133	MVEINRIIIINNPHLLRRHSQWVEVVEDHKEDHTNSTDQVEIRMEDSEFHHHQWMIIQCGLMRMMKTRKRKNR
B0041.2	B0041.2c.1	1462	2	1243	1510	no	1	21	2133	MIIQCGIVHQLEEVNQIVKHVIHSLLNTCNSNNINNNISHTMEVMVIMGCLMVDHCGLLLSWMDPQWYHHIQQWVSDHQLHRHQFQLAC
B0041.2	B0041.2c.1	1463	2	316	592	yes	1	21	2133	MVIWVHRQSNNGINLLHLYLHLNKTISMILRDMVVELVVVEDIIHLICHHMDNVEIIRINTGIECKEVKVVIEGINRGSSSNSLNRDSICHQ
B0041.2	B0041.2a.1	1465	2	1249	1516	no	1	21	2139	MIIQCGIVHQLEEVNQIVKHVIHSLLNTCNSNNINNNISHTMEVMVIMGCLMVDHCGLLLSWMDPQWYHHIQQWVSDHQLHRHQFQLAC
B0041.2	B0041.2a.1	1466	2	622	841	no	1	21	2139	MVEINRIIIINNPHLLRRHSQWVEVVEDHKEDHTNSTDQVEIRMEDSEFHHHQWMIIQCGLMRMMKTRKRKNR
B0041.2	B0041.2a.1	1467	2	316	592	yes	1	21	2139	MVIWVHRQSNNGINLLHLYLHLNKTISMILRDMVVELVVVEDIIHLICHHMDNVEIIRINTGIECKEVKVVIEGINRGSSSNSLNRDSICHQ
B0041.2	B0041.2a.1	1468	2	2017	2146	no	1	21	2139	MEELVQVLHEVVEVVLLVETLLIVVEVVDHLIIIMIIRSLVRC
B0041.2	B0041.2a.2	1470	1	2157	2286	no	3	161	2279	MEELVQVLHEVVEVVLLVETLLIVVEVVDHLIIIMIIRSLVRC
B0041.2	B0041.2a.2	1471	1	762	981	no	3	161	2279	MVEINRIIIINNPHLLRRHSQWVEVVEDHKEDHTNSTDQVEIRMEDSEFHHHQWMIIQCGLMRMMKTRKRKNR
B0041.2	B0041.2a.2	1472	1	456	732	yes	3	161	2279	MVIWVHRQSNNGINLLHLYLHLNKTISMILRDMVVELVVVEDIIHLICHHMDNVEIIRINTGIECKEVKVVIEGINRGSSSNSLNRDSICHQ
B0041.2	B0041.2a.2	1473	1	1389	1656	no	3	161	2279	MIIQCGIVHQLEEVNQIVKHVIHSLLNTCNSNNINNNISHTMEVMVIMGCLMVDHCGLLLSWMDPQWYHHIQQWVSDHQLHRHQFQLAC
B0041.2	B0041.2c.2	1475	1	762	981	no	3	161	2273	MVEINRIIIINNPHLLRRHSQWVEVVEDHKEDHTNSTDQVEIRMEDSEFHHHQWMIIQCGLMRMMKTRKRKNR
B0041.2	B0041.2c.2	1476	1	456	732	yes	3	161	2273	MVIWVHRQSNNGINLLHLYLHLNKTISMILRDMVVELVVVEDIIHLICHHMDNVEIIRINTGIECKEVKVVIEGINRGSSSNSLNRDSICHQ
B0041.2	B0041.2c.2	1477	1	2151	2280	no	3	161	2273	MEELVQVLHEVVEVVLLVETLLIVVEVVDHLIIIMIIRSLVRC
B0041.2	B0041.2c.2	1478	1	1383	1650	no	3	161	2273	MIIQCGIVHQLEEVNQIVKHVIHSLLNTCNSNNINNNISHTMEVMVIMGCLMVDHCGLLLSWMDPQWYHHIQQWVSDHQLHRHQFQLAC
B0041.2	B0041.2d	1480	2	1354	1621	no	1	0	2244	MIIQCGIVHQLEEVNQIVKHVIHSLLNTCNSNNINNNISHTMEVMVIMGCLMVDHCGLLLSWMDPQWYHHIQQWVSDHQLHRHQFQLAC
B0041.2	B0041.2d	1481	2	421	697	yes	1	0	2244	MVIWVHRQSNNGINLLHLYLHLNKTISMILRDMVVELVVVEDIIHLICHHMDNVEIIRINTGIECKEVKVVIEGINRGSSSNSLNRDSICHQ
B0041.2	B0041.2d	1482	2	2122	2251	no	1	0	2244	MEELVQVLHEVVEVVLLVETLLIVVEVVDHLIIIMIIRSLVRC
B0041.2	B0041.2d	1483	2	727	946	no	1	0	2244	MVEINRIIIINNPHLLRRHSQWVEVVEDHKEDHTNSTDQVEIRMEDSEFHHHQWMIIQCGLMRMMKTRKRKNR
Y54E10BR.8	Y54E10BR.8	1485	3	560	689	no	2	94	1351	MMMTIILMSSEIRYLLELTTILITFWKMIYHHKDQFEVVITII
Y54E10BR.8	Y54E10BR.8	1486	3	1301	1433	no	2	94	1351	MILLNKSTRSGRTLCGSDCLGDLFYFFVVENCTFFQFSNKLFFE
Y54E10BR.8	Y54E10BR.8	1487	3	1064	1232	no	2	94	1351	MKRHIVESDRIFVMFVEKVSRRIHMLFGILRTFTIENWLNRMQCYVATMSNRPMNL
Y54E10BR.8	Y54E10BR.8	1488	3	731	914	no	2	94	1351	MWWSTRRNGILRNKRIVPRAESHLQMVRRIVEKWEDSVVIGVLGHLNTNPNWMNIVEHISE
C55B7.11	C55B7.11	1492	1	732	891	no	3	143	1190	MILLAVTLKLAAARFLDQYQTTSLLDLIWKIKVYSLLVLESIPSRMVFLLLRI
C55B7.11	C55B7.11	1493	1	1020	1176	no	3	143	1190	MMKSMRKNNGTSQLPKQHPILILGFISTRILLNHFQTFRLQCLSTRNHYQRL
C55B7.11	C55B7.11	1494	2	349	505	no	3	143	1190	MPINDCNGRRTVAYGRKIMDYSTSDSMGSYHEYCQRRFSLYSSIPSVIQRSF
C35E7.3	C35E7.3	1496	2	823	994	no	1	0	1476	MISYLSITKIIVRNLTCQSTLDIILKKGKLANTCSTTEHYNSNVLNVQIVYLIRGKL
C35E7.3	C35E7.3	1497	2	619	742	yes	1	0	1476	MDFLLSVYQLLIKMIRQELWNTLVIRMDLLESIGLKQTALD
C17H1.13	C17H1.13	1500	3	830	950	no	1	0	879	MEEGLRKCTKFEKSLELKFIDLFVILIAVIIQRLKLFFVL
Y73E7A.8	Y73E7A.8	1502	1	615	744	no	3	74	2114	MSKMGLRELLRKRCLELGQKCLEQELLLCQMLLEEPRLGLKIC
Y73E7A.8	Y73E7A.8	1503	1	192	480	no	3	74	2114	MDLQLQDLLYYLLMHKWFTLRSGLPGQHGHSVRTLIVFVSVPATPSAVSDASDQTSRQKPAIQRQARFLEDPLVRIPSIRMIMIVLIHGKKIELKR
Y73E7A.8	Y73E7A.8	1504	2	1468	1609	yes	3	74	2114	MEKRHSLRRGDSADNNYPDNSKSHHNSSPAPCHDDTIRFPDSRGDLT
Y73E7A.8	Y73E7A.8	1505	2	274	433	yes	3	74	2114	MVILFGLSSYSCPCLQHRPRFQMPRTKPADRSLRSSDKPDSWKTPSSEYHQSG
Y44E3A.6	Y44E3A.6a	1507	2	1573	1795	no	1	9	2532	MWKVSIRSLMTSSLHWHELKLIERIAMSKWFSRLLRHSMRIFECEKAICSIESSKFARTDVSTQSPQSVMVSPI
Y44E3A.6	Y44E3A.6a	1508	2	1798	1999	no	1	9	2532	MEIWRHLYEIRVLKQPNILVNVLEVRREMLLLNVFYRRLNGVVKCFSNGSMSILGMELMSIWLQRLK
Y44E3A.6	Y44E3A.6a	1509	2	967	1114	no	1	9	2532	MMDIKLLYTNVRVGSVSEEFASRPLELSINLLAFRIRQRILCICSMWMA
Y44E3A.6	Y44E3A.6a	1510	3	2531	2744	no	1	9	2532	MICSTTSAGSDRPKKNNFFLLQINQISQILSFTLTVFIFFFVFFKKRSTKKGKNAQNFKFFLIFFTNSRCN
Y44E3A.6	Y44E3A.6b	1512	2	1573	1795	no	1	9	2538	MWKVSIRSLMTSSLHWHELKLIERIAMSKWFSRLLRHSMRIFECEKAICSIESSKFARTDVSTQSPQSVMVSPI
Y44E3A.6	Y44E3A.6b	1513	2	1798	1999	no	1	9	2538	MEIWRHLYEIRVLKQPNILVNVLEVRREMLLLNVFYRRLNGVVKCFSNGSMSILGMELMSIWLQRLK
Y44E3A.6	Y44E3A.6b	1514	2	967	1114	no	1	9	2538	MMDIKLLYTNVRVGSVSEEFASRPLELSINLLAFRIRQRILCICSMWMA
Y44E3A.6	Y44E3A.6b	1515	3	2537	2750	no	1	9	2538	MICSTTSAGSDRPKKNNFFLLQINQISQILSFTLTVFIFFFVFFKKRSTKKGKNAQNFKFFLIFFTNSRCN
C24A11.1	C24A11.1	1517	2	364	562	no	1	51	657	MDPMDVRTSIAGRNHVETSGRKRPTTIRSSTSRSAVPESSNKTGKICKHAANRIFPRLLLTYRTVR
C36B1.11	C36B1.11	1519	2	682	856	no	1	159	1140	MHFMMLMRQLRETQKMVLRRAMMITYQMFRMNVKDLLGRLFHQKNPVFILHQLLAQLS
C36B1.11	C36B1.11	1520	2	1021	1174	no	1	159	1140	MQFLVLQIILMIESNLTIKKRQLPSTWREITRSSGRASFNEFNFTEQMSTY
C36B1.11	C36B1.11	1521	3	776	908	no	1	159	1140	MSRIFSVVYFIKKIQYSFYINYWHSYPESESRQRPFMQRSLRRR
T23D8.2	T23D8.2	1524	1	615	795	no	3	92	788	MLHSLSPDAFTVSNNGCSRMEQWSAEFVQFWQQFNWSESVSLVVFQNQFSRISMTFIISS
T23D8.2	T23D8.2	1525	1	402	531	no	3	92	788	MHCMIVSDLELVISFRRVWYDITRVEELRVHGIRHISCLNVVE
T23D8.2	T23D8.2	1526	2	637	775	no	3	92	788	MHSQCRTMGAQEWSNGRRNLCSFGSNSIGRSLFRLLSFKINSQGFP
Y48G8AR.3	Y48G8AR.3	1528	2	235	364	yes	1	0	336	MEQRFSNLSNWLIFDCTVLTRRTRFPNTIGLFQFNFAFFFQIF
Y48G8AR.3	Y48G8AR.3	1529	3	17	146	no	1	0	336	MQSICNATQITKTPCDAQPGRGKSQRNFQIPADFRASSHGWNP
C32E8.4	C32E8.4.1	1532	2	430	550	no	3	107	287	MRAYIMCMSFLRFHRSLFLHYIPGRHLRYTTFFLVFSVVV
C54G4.1	C54G4.1b	1534	3	857	977	no	1	0	567	MLLYLVSCKFLIFYNHFVRYTYLYSSTYPHVIFSLSPVTP
C54G4.1	C54G4.1a	1536	1	2631	2751	no	2	25	2341	MLLYLVSCKFLIFYNHFVRYTYLYSSTYPHVIFSLSPVTP
C54G4.1	C54G4.1a	1537	3	1703	1832	no	2	25	2341	MLEILNQNTTNNVIYGHLELYCSQCYRVKFHSMHVLVKNRQLK
C54G4.1	C54G4.1a	1538	3	776	914	no	2	25	2341	MLMLAISSANCWKRNLKNVSDTMELMKLKIINLCQVLTGMQLLSVH
W04C9.1	W04C9.1	1540	1	600	879	no	2	67	2428	MALAYFRILVALYLFDHPYLRSLLHGTSHRYRGRHKIVPSPLQRCLHHDNHLVGERCRRRIPWRILRVRLRKDPEGNPLRFVPRTRETGCRFL
W04C9.1	W04C9.1	1541	1	261	405	yes	2	67	2428	MDGAGGNPRGQQGGHVDNVERANFLLGTAHLRGEPHKIAPPHRKAEAR
W04C9.1	W04C9.1	1542	3	527	743	no	2	67	2428	MRISRWLQNKRLSLFSACSNTANVNGSGIFPDSRGSLFIRSPVSSFPITRDKSSLPWSPQNRTQPSPTLSTS
W04C9.1	W04C9.1	1543	3	1544	1835	no	2	67	2428	MLLERSSSEMFTSVIQLVPISQSLRISRLPLNQERLSHWLDHLALESLRAFLCLRTSTSRMLDRFWWMEFRWKNSSIIIFIRRSPLSARSPSCSLVL
W04C9.1	W04C9.1	1544	3	155	308	no	2	67	2428	MMELSNSRILLRNLAIFRFLRAQSTYSCCNFSVLHYGWCRRQSTWPTRRTR
W04C9.1	W04C9.1	1545	3	1097	1349	no	2	67	2428	MISSPKEHRTQLPSPMTLPRKFSPQCVQSDPFPARTSKPIASTGSSPTHLMSPEPRRSPISDSSGSPNFSSRSSLCQSSGMEAI
C10H11.6	C10H11.6b	1547	2	928	1345	no	1	0	1584	MYHLIKCRLRGKPEYSRLSNQCQMSHSSGNMNPMMSRLLMEFQIFTFQNGYLKQLFSMTLGYPLSLHMEVSAQQMNWLIVQNQLLWFQFTVIKLEMRICLQDMVQLLYFTRRNWQMCNELKKLYMTFFTTNSTRKVLKE
C10H11.6	C10H11.6a	1549	3	959	1376	no	2	28	1615	MYHLIKCRLRGKPEYSRLSNQCQMSHSSGNMNPMMSRLLMEFQIFTFQNGYLKQLFSMTLGYPLSLHMEVSAQQMNWLIVQNQLLWFQFTVIKLEMRICLQDMVQLLYFTRRNWQMCNELKKLYMTFFTTNSTRKVLKE
Y95D11A.3	Y95D11A.3	1551	2	82	322	no	1	0	795	MMKRNMMVKGHKMNHFLMMSQAPAVITITTNFPMTWIQMMFIYSMRKLIKFISSTRINSKIMKKLTMSNILINLCLPRHQ
Y95D11A.3	Y95D11A.3	1552	3	794	914	no	1	0	795	MILILDLISIFFFFFQKLLIFFPFDLKLSYPSNHFYGLFC
F25D7.5	F25D7.5	1554	2	1417	1543	no	1	0	3648	MIFKLFAQKVHQFNPRRSILQTEEDLCKSGSTKKLKYLILPN
F25D7.5	F25D7.5	1555	2	3478	3604	no	1	0	3648	MFSNQKSTMMMLMILTERDLIMKLIRKPTKLQEKKQRLKTTL
F25D7.5	F25D7.5	1556	2	310	640	no	1	0	3648	MKRPLDHRHLLRRAYQQAKVWFRAPHPTKILKQLLLRLRSHLAPSPAPPKKSQVEQLETHLELLKSLQLSLRCHWLHNPLTLHPCRQPHLLQLNQVQHLPKAPQHPLLVI
F25D7.5	F25D7.5	1557	3	2933	3068	no	1	0	3648	MGSHTRGNHLWSIQFCPRTLHGSKLLVLYSMARDEKVSCSICSIL
F25D7.5	F25D7.5	1558	3	2522	2651	yes	1	0	3648	MGYNGCSTNGCTIAFIGSSTGCPFSIKLESTSFNMDMRWCDLQ
F25D7.5	F25D7.5	1559	3	1742	1865	no	1	0	3648	MLLHKINYNCLMWNTWKYNAKSNNYQLCSRRCCSEACKYNV
T04D3.4	T04D3.4c.2	1561	3	47	170	yes	2	1648	2062	MEKIFGRRSCTCQNSSWELKVKLLIIIMTMKLCVLSIQWQM
T04D3.4	T04D3.4c.2	1562	3	248	449	no	2	1648	2062	MNCSEQWLRIWRASWIPLTHFTISLITSCTRQNSVVHHFDVMFRQMELFFFIITRSAVVYILLLKAL
T04D3.4	T04D3.4c.2	1563	3	572	788	no	2	1648	2062	MLTVLSQNRFLQKLTHKLIYQRESTRSHRPTFPWHSLITFVSILTFSSSILETLSRKRFQMRCAKRHESLIF
T04D3.4	T04D3.4c.2	1564	3	947	1070	no	2	1648	2062	MRENTYYTCARLMSLRSVNSSRETSICQICNVTMELVTSSC
T04D3.4	T04D3.4c.2	1565	3	2003	2126	no	2	1648	2062	MDQVWIPAVITSDHRLAQFLNFIFFFFYFYLKKKTLLLCIK
T04D3.4	T04D3.4b	1567	3	47	170	yes	2	1312	2062	MEKIFGRRSCTCQNSSWELKVKLLIIIMTMKLCVLSIQWQM
T04D3.4	T04D3.4b	1568	3	248	449	no	2	1312	2062	MNCSEQWLRIWRASWIPLTHFTISLITSCTRQNSVVHHFDVMFRQMELFFFIITRSAVVYILLLKAL
T04D3.4	T04D3.4b	1569	3	572	788	no	2	1312	2062	MLTVLSQNRFLQKLTHKLIYQRESTRSHRPTFPWHSLITFVSILTFSSSILETLSRKRFQMRCAKRHESLIF
T04D3.4	T04D3.4b	1570	3	947	1070	no	2	1312	2062	MRENTYYTCARLMSLRSVNSSRETSICQICNVTMELVTSSC
T04D3.4	T04D3.4b	1571	3	2003	2126	no	2	1312	2062	MDQVWIPAVITSDHRLAQFLNFIFFFFYFYLKKKTLLLCIK
T04D3.4	T04D3.4a	1574	2	250	451	no	1	0	2064	MNCSEQWLRIWRASWIPLTHFTISLITSCTRQNSVVHHFDVMFRQMELFFFIITRSAVVYILLLKAL
T04D3.4	T04D3.4a	1575	2	49	172	yes	1	0	2064	MEKIFGRRSCTCQNSSWELKVKLLIIIMTMKLCVLSIQWQM
T04D3.4	T04D3.4a	1576	2	574	790	no	1	0	2064	MLTVLSQNRFLQKLTHKLIYQRESTRSHRPTFPWHSLITFVSILTFSSSILETLSRKRFQMRCAKRHESLIF
T04D3.4	T04D3.4a	1577	2	949	1072	no	1	0	2064	MRENTYYTCARLMSLRSVNSSRETSICQICNVTMELVTSSC
ZK973.1	ZK973.1	1580	2	337	484	no	1	0	2235	MKSPIFLKNILLGQEKRKRILPGPWASSLQHSRFSMETLLILKVCCQMV
ZK973.1	ZK973.1	1581	3	1151	1271	yes	1	0	2235	MVAANREKRYCIRNWKWYEYIQYTDCCIRYDQQQCVPQRN
T28F2.7	T28F2.7	1583	2	1162	1303	no	1	0	2142	MRGEIARIVGHVDMTTVFRTLLQCARRCARLNTFKICVDVPLLYTII
T28F2.7	T28F2.7	1584	2	667	880	no	1	0	2142	MEELMLHHYILVIMFLSIMSHLILTSLLTISSWMQASPVEICSKCAPSVVVALIVVNTLLQYFLTLENASL
T28F2.7	T28F2.7	1585	3	158	332	no	1	0	2142	MFDCWGYAEYQTICEQRIIPLRAETIFKTSFTIDCGCTCCSFKEDQKYRRSLIDYSRI
ZK484.4	ZK484.4b	1587	2	1231	1357	no	1	0	2619	MFQKNCSPRHGQHEQVDLTTSIFLSRTLQMRNIRRKRRKWKK
ZK484.4	ZK484.4b	1588	2	304	460	no	1	0	2619	MKDVQILEEHQDQLLPGFMEIARVLRRLQHLLQQVHLAHLMSLPLRIARKNH
ZK484.4	ZK484.4b	1589	2	1792	1912	no	1	0	2619	MDILFIHHHLLLNQRHLFSEIEQLDVEQHDLMIKIISRMC
ZK484.4	ZK484.4b	1590	2	1927	2050	no	1	0	2619	MIRNSMQWNHQWLHRQNEQLKTLQPPLLHQQLPFQNGLIVN
ZK484.4	ZK484.4b	1591	2	523	745	no	1	0	2619	MRKSSNLSVKRIVWRRFSPNITWNFWTMKQAPQTCIIESWNLWMYIFVSRPGRAIVQSYCVNFSVIIFLKHVNN
ZK484.4	ZK484.4a	1593	2	1231	1357	no	1	0	2757	MFQKNCSPRHGQHEQVDLTTSIFLSRTLQMRNIRRKRRKWKK
ZK484.4	ZK484.4a	1594	2	2065	2188	no	1	0	2757	MIRNSMQWNHQWLHRQNEQLKTLQPPLLHQQLPFQNGLIVN
ZK484.4	ZK484.4a	1595	2	304	460	no	1	0	2757	MKDVQILEEHQDQLLPGFMEIARVLRRLQHLLQQVHLAHLMSLPLRIARKNH
ZK484.4	ZK484.4a	1596	2	523	745	no	1	0	2757	MRKSSNLSVKRIVWRRFSPNITWNFWTMKQAPQTCIIESWNLWMYIFVSRPGRAIVQSYCVNFSVIIFLKHVNN
F32B4.4	F32B4.4a	1598	2	2551	2749	yes	1	0	3219	MVVVEAAAMAAAATDVAKLGDHHHHRNSITVVREDSEEIAAEQAVIASLLPRRTLIAIATAAVVTL
F32B4.4	F32B4.4a	1599	2	964	1207	no	1	0	3219	MSVRMMRLFWTMKRICSRIHWMSPLSKRSQKPLSQHRNNCKKWRHQLHRQHHQKQLLHLPAVENRCSLEMTSRRRRYGFVE
F32B4.4	F32B4.4a	1600	2	2035	2308	no	1	0	3219	MLHEHRIKRSNTPESVPLLLLLLREDVKYHRIVRNSVVIEMSRRRVELHRSNHLDVVELLLRSHLVVRKEQEDRKSRREDVYLMSVNNWLT
F32B4.4	F32B4.4a	1601	2	2788	3223	no	1	0	3219	MLEDLMGFNRCQTLARTLPTTINNDRRPLLPMIYRLLQLCHKLEPPILEQHIISRMEMFISIILPPIQCGEDLMLKDTWQWTLIGLKMLQLHRHLHLLVVVVDNNGNSNLMEVINISIIRTITRLNHLHRIDAAMIMEIIAEIIX
F32B4.4	F32B4.4a	1602	2	358	622	no	1	0	3219	MSWRCQVMRKMIHWWRMKSLRKLSKLSRSLRPWSQLSRRSPRRSLRRSPRRSLRKSPRKSLLSQKSLQLRSRWQRLLRWKRQSRSLLS
F32B4.4	F32B4.4a	1603	2	688	826	no	1	0	3219	MSPKWCQWKLKKQRNRMSKTVRTSLRRMIHRRILRLLSQLYKNRSR
F32B4.4	F32B4.4a	1604	3	1193	1346	yes	1	0	3219	MDSWNDSGDEGFKCQATREPIRKSDPIEDFQFKGCRREWRRQKLLCTHPIC
F32B4.4	F32B4.4b.1	1606	1	60	273	no	2	157	2146	MKKSTRRSNEMARAAAAAAAEKVEKGAGDEGNDENATREPIRKSDPIEDFQFKGCRREWRRQKLLCTHPIC
F32B4.4	F32B4.4b.1	1607	3	962	1235	no	2	157	2146	MLHEHRIKRSNTPESVPLLLLLLREDVKYHRIVRNSVVIEMSRRRVELHRSNHLDVVELLLRSHLVVRKEQEDRKSRREDVYLMSVNNWLT
F32B4.4	F32B4.4b.1	1608	3	1715	2150	no	2	157	2146	MLEDLMGFNRCQTLARTLPTTINNDRRPLLPMIYRLLQLCHKLEPPILEQHIISRMEMFISIILPPIQCGEDLMLKDTWQWTLIGLKMLQLHRHLHLLVVVVDNNGNSNLMEVINISIIRTITRLNHLHRIDAAMIMEIIAEIIX
F32B4.4	F32B4.4b.1	1609	3	1478	1676	yes	2	157	2146	MVVVEAAAMAAAATDVAKLGDHHHHRNSITVVREDSEEIAAEQAVIASLLPRRTLIAIATAAVVTL
F32B4.4	F32B4.4c	1611	1	2667	3102	no	3	92	3098	MLEDLMGFNRCQTLARTLPTTINNDRRPLLPMIYRLLQLCHKLEPPILEQHIISRMEMFISIILPPIQCGEDLMLKDTWQWTLIGLKMLQLHRHLHLLVVVVDNNGNSNLMEVINISIIRTITRLNHLHRIDAAMIMEIIAEIIX
F32B4.4	F32B4.4c	1612	1	2430	2628	yes	3	92	3098	MVVVEAAAMAAAATDVAKLGDHHHHRNSITVVREDSEEIAAEQAVIASLLPRRTLIAIATAAVVTL
F32B4.4	F32B4.4c	1613	1	843	1086	no	3	92	3098	MSVRMMRLFWTMKRICSRIHWMSPLSKRSQKPLSQHRNNCKKWRHQLHRQHHQKQLLHLPAVENRCSLEMTSRRRRYGFVE
F32B4.4	F32B4.4c	1614	1	237	501	no	3	92	3098	MSWRCQVMRKMIHWWRMKSLRKLSKLSRSLRPWSQLSRRSPRRSLRRSPRRSLRKSPRKSLLSQKSLQLRSRWQRLLRWKRQSRSLLS
F32B4.4	F32B4.4c	1615	1	1914	2187	no	3	92	3098	MLHEHRIKRSNTPESVPLLLLLLREDVKYHRIVRNSVVIEMSRRRVELHRSNHLDVVELLLRSHLVVRKEQEDRKSRREDVYLMSVNNWLT
F32B4.4	F32B4.4c	1616	1	567	705	no	3	92	3098	MSPKWCQWKLKKQRNRMSKTVRTSLRRMIHRRILRLLSQLYKNRSR
F32B4.4	F32B4.4c	1617	2	1072	1225	yes	3	92	3098	MDSWNDSGDEGFKCQATREPIRKSDPIEDFQFKGCRREWRRQKLLCTHPIC
F32B4.4	F32B4.4b.2	1619	2	1033	1306	no	1	228	2217	MLHEHRIKRSNTPESVPLLLLLLREDVKYHRIVRNSVVIEMSRRRVELHRSNHLDVVELLLRSHLVVRKEQEDRKSRREDVYLMSVNNWLT
F32B4.4	F32B4.4b.2	1620	2	1786	2221	no	1	228	2217	MLEDLMGFNRCQTLARTLPTTINNDRRPLLPMIYRLLQLCHKLEPPILEQHIISRMEMFISIILPPIQCGEDLMLKDTWQWTLIGLKMLQLHRHLHLLVVVVDNNGNSNLMEVINISIIRTITRLNHLHRIDAAMIMEIIAEIIX
F32B4.4	F32B4.4b.2	1621	2	1549	1747	yes	1	228	2217	MVVVEAAAMAAAATDVAKLGDHHHHRNSITVVREDSEEIAAEQAVIASLLPRRTLIAIATAAVVTL
F32B4.4	F32B4.4b.2	1622	3	131	344	no	1	228	2217	MKKSTRRSNEMARAAAAAAAEKVEKGAGDEGNDENATREPIRKSDPIEDFQFKGCRREWRRQKLLCTHPIC
Y95B8A.5	Y95B8A.5.1	1624	2	31	154	no	1	6	1077	MKQRNEDPRRLIDCSKKTARTQCEPSSFCSWEPASLENRRF
Y95B8A.5	Y95B8A.5.1	1625	2	520	658	no	1	6	1077	MTFSAQESRQQESWRRSLSTKIAYFWFSTLADSDPNEKSGFIASKT
Y95B8A.5	Y95B8A.5.2	1627	3	518	656	no	2	4	1075	MTFSAQESRQQESWRRSLSTKIAYFWFSTLADSDPNEKSGFIASKT
Y95B8A.5	Y95B8A.5.2	1628	3	29	152	no	2	4	1075	MKQRNEDPRRLIDCSKKTARTQCEPSSFCSWEPASLENRRF
W02A11.3	W02A11.3	1630	1	699	1092	no	2	16	1483	MSTPSSATTTTASATASAYPIESNSTSTTNGSQFGVADDCSRSHASCASTRINIPLFFTATHTKLSGDDGTSDGSSCSTTRCSRCSSSRRRGGGSGTTTTSTTSTADASRSGSDSSAEQSVQFVRLQKFTY
W02A11.3	W02A11.3	1631	3	1094	1325	no	2	16	1483	MCTHQATLENTLSCSVPSNFYSRRPSDTESIGIICSVDSIWIFQSVPRRWKSTHSRFRRCTRRKRTAKRTRTRVRSA
W02A11.3	W02A11.3	1632	3	1340	1463	yes	2	16	1483	MERAYKNYDAITFSIRNVFINGWTSTSGAPCAGRKSIGLNL
F52B5.2	F52B5.2.2	1634	1	867	993	no	3	0	905	MNISKRRQVHRLTNFNYSYYYFQFNFLFNFKSTDESRKQGLF
F52B5.2	F52B5.2.2	1635	1	75	195	no	3	0	905	MIRGKRWYFWQNRAMKRRRRLSSNFSSADTEKTKLNTWTF
F52B5.2	F52B5.2.2	1636	1	204	354	no	3	0	905	MNNVEISLKCSNRSKPQKYVWEWFSNAMKLTCSEYSATANDFNHLLFKSI
F52B5.2	F52B5.2.1	1638	2	202	352	no	1	0	903	MNNVEISLKCSNRSKPQKYVWEWFSNAMKLTCSEYSATANDFNHLLFKSI
F52B5.2	F52B5.2.1	1639	2	73	193	no	1	0	903	MIRGKRWYFWQNRAMKRRRRLSSNFSSADTEKTKLNTWTF
F52B5.2	F52B5.2.1	1640	2	865	991	no	1	0	903	MNISKRRQVHRLTNFNYSYYYFQFNFLFNFKSTDESRKQGLF
Y71G12B.35	Y71G12B.35	1642	2	541	724	no	1	0	1047	MFHRNPFQDQLGSLKKYRKNRCLLGKSFREPVKSRKVTHKFKRSKLRKNGLIQQKSARIAI
Y65B4A.3	Y65B4A.3	1644	1	462	732	no	3	89	713	MKSTGLWKKPKRRRNIRKKSRICCPASFPTRMSRTLRRNWRICWRRNGAQFNFQRLRAMSCLKQSGNGKKKKRSHVARRLLWKPKYCLLL
ZC581.2	ZC581.2	1648	3	584	779	yes	2	4	1030	MGWFEDSRTWMEHVVNRDTNLVLEGHCATRLCVSTMEKNRPQLMTLCQWPTLGLSFSLSTFPGNW
ZC581.2	ZC581.2	1649	3	788	944	no	2	4	1030	MTSDRLKWTLILQTLHTCCSPDPISPCSVERFSICDRRMSPIILHCKICFVT
W09C5.11	W09C5.11	1651	1	75	309	no	3	179	290	MQKTNGLAPRGCNKRSSIKDSQFLSENPSSTTSSTCSVVSSSSSLSFSKSSSPLPITLPSRLQLPRARLIRTDYSLFE
T05F1.4	T05F1.4.1	1653	1	588	795	no	2	10	619	MPTRTSQAELVTSDSQYPSLQLPNPNNTTKSCHIVALEIFSHYVFKLSDSFILYLYNIFIFSQNQYGFS
T05F1.4	T05F1.4.1	1654	3	173	437	no	2	10	619	MNIVSTTIANKIGRIVVLQVHPIIIKFKHTVIIRLMHVLLYHRMIETKAVTGFPLHLSDEMEGIVIGMDTMRKKKSQQEEAVMIYELF
T05F1.4	T05F1.4.2	1656	1	588	795	no	2	10	619	MPTRTSQAELVTSDSQYPSLQLPNPNNTTKSCHIVALEIFSHYVFKLSDSFILYLYNIFIFSQNQYGFS
T05F1.4	T05F1.4.2	1657	3	173	437	no	2	10	619	MNIVSTTIANKIGRIVVLQVHPIIIKFKHTVIIRLMHVLLYHRMIETKAVTGFPLHLSDEMEGIVIGMDTMRKKKSQQEEAVMIYELF
F15D3.7	F15D3.7.1	1659	3	473	623	yes	2	4	730	MAQDLLNRLEQSFLCIQRWKSGSDRYVLRMSLMDLEPEHLPEQFIDHRMD
F15D3.7	F15D3.7.2	1661	2	475	625	yes	1	6	732	MAQDLLNRLEQSFLCIQRWKSGSDRYVLRMSLMDLEPEHLPEQFIDHRMD
F56C11.6	F56C11.6a	1663	1	339	468	no	2	10	1654	MARRLPSDGLHPWRRLRCSLIQQLRLRFHRTKPLHQGRRRRDH
F56C11.6	F56C11.6a	1664	3	605	866	no	2	10	1654	MLQSLAKVQVEHLWICFAYRRTRGDCSIGRFRWQGMENVILRCGLVSSRLSCRGSLRDTLDGKEMTTTVKTFSNSSTSNPFTRSRWA
F56C11.6	F56C11.6a	1665	3	89	254	no	2	10	1654	MSKKTVQWWRGSLESRTPSHQLEPCALRSQLLIGNGRSRWIVLGSGQGVRKMMSY
F56C11.6	F56C11.6a	1666	3	1475	1622	yes	2	10	1654	METLMEKTRRLENGKSTTRHTRSAISRLIWTILKWLRTIRNGEPSYGIN
F56C11.6	F56C11.6b	1668	2	1114	1261	yes	1	0	1293	METLMEKTRRLENGKSTTRHTRSAISRLIWTILKWLRTIRNGEPSYGIN
F56C11.6	F56C11.6b	1669	2	244	505	no	1	0	1293	MLQSLAKVQVEHLWICFAYRRTRGDCSIGRFRWQGMENVILRCGLVSSRLSCRGSLRDTLDGKEMTTTVKTFSNSSTSNPFTRSRWA
D2092.1	D2092.1a	1671	2	1846	2059	no	1	0	2208	MKRQEQESVMQLVQFRRSYFPFNHIFILLLNSSKKSKIHSISLISGYQLLQLLSYHLHLFFCILCPFDGSF
D2092.1	D2092.1b	1673	2	2104	2317	no	1	0	2466	MKRQEQESVMQLVQFRRSYFPFNHIFILLLNSSKKSKIHSISLISGYQLLQLLSYHLHLFFCILCPFDGSF
F30A10.6	F30A10.6	1676	2	415	643	no	1	30	1803	MCCLLADSTTRRLLTSHAHFNGFRRTLFLCSKQEVCWTEPANVSYGMDIYCHRSGRSLVQKDTHCPLFMVLLARIV
F30A10.6	F30A10.6	1677	2	1780	1912	no	1	30	1803	MLRSSNWTNAISVRKPFIPTIKVAPLFCVFIFSRCRKREFIYCR
F30A10.6	F30A10.6	1678	2	1252	1426	no	1	30	1803	MWFSRCWHVNHSPNNFECLEFYIQSRKFKIFHFLKMHSNKCGQIMVMNVVVNMLEQAH
F30A10.6	F30A10.6	1679	3	476	665	no	1	30	1803	MASGERCSFVQNKKYVGQSQRTFHMEWTSTVTDPAGPWCRKIHIARYSWFYWPESCECEWKRD
F30A10.6	F30A10.6	1680	3	1805	1931	no	1	30	1803	MPYLSENRSFLQSKLHPFFVYLFFRVVERESLFIVDEVCTNK
F56G4.7	F56G4.7	1682	2	91	442	no	1	0	516	MLPFRSMTLDSMWIVQRAMALRAQFMEGKLEMPRFRSSLVWIVLVMISGISLLARWFFMMLSSQIRISMNISNCGRTRSSTESSTSQSMFHKERSSSWRRLSLELRDSKKLKTIQPR
F11A6.2	F11A6.2	1684	2	97	247	no	1	0	780	MKSCNLWRFWRIGGPQNDTRLEMKMENSVMMCSKSPMVVKEGSVVHNVDL
F11A6.2	F11A6.2	1685	2	718	901	no	1	0	780	MSTNPRSVVEVHRMSGAAPFVSHKHSACNCFFFYFFYLKMLKFKLFIILFFYFSKINKKMF
Y20F4.2	Y20F4.2	1687	1	300	573	yes	2	97	1516	MGSQSRRIPAERPSNAILLSTTMATKLAARDSTQTYPRTSKSITRGSHDRKCIWITITSLSSVWNEIEWIITIARSNASPTPAVYALWTPV
Y20F4.2	Y20F4.2	1688	3	161	443	no	2	97	1516	MRRIQRLRILCDRCNQSPIIRRIHQDHRRQLHQCPFRNRVSFHLNNHGVTISEDPCRTSIKCHPTLHHNGHQIGSTRFNTDLSKDIEVDHQRIT
Y20F4.2	Y20F4.2	1689	3	1343	1961	no	2	97	1516	MLKVHLGIMLIRIMILMILASTHWTACYVTERRHRQYPTTKHPTTHSMIRAVHKCSKIRSRPRTWCQSVSFRFDLRRSTKNAHFLKIPAFFVDQTVMGLAPCLYLSFTFSLSLCLSNSLAPRHEIPRGGAYFYRNIPQNSKTTIKCDKRRISEAPKHTPLHPRISMFLIFEKKIDNFITLCVSHSLTLFQNLPLVPQRKYYGDIKC
Y20F4.2	Y20F4.2	1690	3	1031	1193	no	2	97	1516	MISIKMPEVYPIFKMCNSSSNSNRKFIQTGEPLVVDTIMLQLDQDIVQVHVVRG
Y20F4.2	Y20F4.2	1691	3	503	758	no	2	97	1516	MDYHDRPIERLPNTRSIRPMDPRITNLDSLCRPSRGIKSIVHVRILQFITWAVWFQCIHITINNNKWHFIKCLIIFKIRCLDHLE
T05F1.11	T05F1.11	1693	1	1650	1797	no	3	38	2066	MFLSSDIYIHQDHILNECSMERLLDCIIPVIGVNHLVTLHQFSHNSIVK
T05F1.11	T05F1.11	1694	1	1998	2124	no	3	38	2066	MDEIKCLVFSTTRKHWLITGSLYNFFFFCMYLCFWLMLYLLV
T05F1.11	T05F1.11	1695	2	2137	2335	no	3	38	2066	MIFADDIKLLGDNVSAIQKSINVVTDWCAKWKLNLAENKTNVIHFGKRNPKNEYYANGMKVTKKDS
M05B5.5	M05B5.5a	1697	2	898	1063	no	1	9	1206	MTKIRIGDHRIMLEKEYEFVTSIRHSKSSDECAHSTIRIQNGIKQNWEFYTMQYL
M05B5.5	M05B5.5a	1698	2	91	253	no	1	9	1206	MHMIILIILIRQRFRCLIIGVDTISTRILRCKQRILIIHQPSFQHIHQLKPLLP
M05B5.5	M05B5.5a	1699	3	1319	1454	no	1	9	1206	MFPFISLRIGGPVISQLQSVFSFKNFKLYYKIITIFCMFLIYFLL
F55A12.9	F55A12.9b	1701	2	94	223	yes	1	33	1404	MDKTSRETSNISNARITIKTNKIIRTRIKDIRNHKMSNSCQGQ
F55A12.9	F55A12.9b	1702	2	1378	1684	no	1	33	1404	MQLHGFQSSDPIEPLPPLTFCPPFFENQTTTEKKTILSATLYIIVNRHHQFVGTLISYFHLRIDIFSTCVTHHILVLYRFLIHFPLQLKLFAYWCNLFHFEV
F55A12.9	F55A12.9b	1703	3	1304	1505	no	1	33	1404	MLHSTKLLIRFLNTSTNDSFLLATRCSYMDSSHLIQLNLFPLLHSVHPSSKIKPQLKKKQFSLQLYT
F55A12.9	F55A12.9d.1	1705	2	1321	1627	no	1	24	1347	MQLHGFQSSDPIEPLPPLTFCPPFFENQTTTEKKTILSATLYIIVNRHHQFVGTLISYFHLRIDIFSTCVTHHILVLYRFLIHFPLQLKLFAYWCNLFHFEV
F55A12.9	F55A12.9d.1	1706	2	37	166	yes	1	24	1347	MDKTSRETSNISNARITIKTNKIIRTRIKDIRNHKMSNSCQGQ
F55A12.9	F55A12.9d.1	1707	3	1247	1448	no	1	24	1347	MLHSTKLLIRFLNTSTNDSFLLATRCSYMDSSHLIQLNLFPLLHSVHPSSKIKPQLKKKQFSLQLYT
F55A12.9	F55A12.9a	1709	1	1500	1806	no	3	116	1526	MQLHGFQSSDPIEPLPPLTFCPPFFENQTTTEKKTILSATLYIIVNRHHQFVGTLISYFHLRIDIFSTCVTHHILVLYRFLIHFPLQLKLFAYWCNLFHFEV
F55A12.9	F55A12.9a	1710	1	216	345	yes	3	116	1526	MDKTSRETSNISNARITIKTNKIIRTRIKDIRNHKMSNSCQGQ
F55A12.9	F55A12.9a	1711	2	1426	1627	no	3	116	1526	MLHSTKLLIRFLNTSTNDSFLLATRCSYMDSSHLIQLNLFPLLHSVHPSSKIKPQLKKKQFSLQLYT
F55A12.9	F55A12.9d.2	1713	1	99	246	no	2	187	1510	MRGRRSRTVITYDQHGNMHKVLGSSRNKQNEKRKWTKPAGKPAISAMPE
F55A12.9	F55A12.9d.2	1714	1	1410	1611	no	2	187	1510	MLHSTKLLIRFLNTSTNDSFLLATRCSYMDSSHLIQLNLFPLLHSVHPSSKIKPQLKKKQFSLQLYT
F55A12.9	F55A12.9d.2	1715	3	200	329	yes	2	187	1510	MDKTSRETSNISNARITIKTNKIIRTRIKDIRNHKMSNSCQGQ
F55A12.9	F55A12.9d.2	1716	3	1484	1790	no	2	187	1510	MQLHGFQSSDPIEPLPPLTFCPPFFENQTTTEKKTILSATLYIIVNRHHQFVGTLISYFHLRIDIFSTCVTHHILVLYRFLIHFPLQLKLFAYWCNLFHFEV
F55A12.9	F55A12.9c	1718	2	124	253	yes	1	39	1434	MDKTSRETSNISNARITIKTNKIIRTRIKDIRNHKMSNSCQGQ
F55A12.9	F55A12.9c	1719	2	1408	1714	no	1	39	1434	MQLHGFQSSDPIEPLPPLTFCPPFFENQTTTEKKTILSATLYIIVNRHHQFVGTLISYFHLRIDIFSTCVTHHILVLYRFLIHFPLQLKLFAYWCNLFHFEV
F55A12.9	F55A12.9c	1720	3	1334	1535	no	1	39	1434	MLHSTKLLIRFLNTSTNDSFLLATRCSYMDSSHLIQLNLFPLLHSVHPSSKIKPQLKKKQFSLQLYT
W03G9.3	W03G9.3	1722	1	381	519	no	2	94	1480	MCIHDQCSQGHAEVHRIWHPDRLRHFPHFFVFLPRGSEGEGAEEVF
Y52B11C.1	Y52B11C.1	1726	2	124	358	no	1	0	774	MMRQCSFRRLFVLFYKLVIVSLSFVFRMEISMDWVKSVPVSCRVLPRSWESQRVTSSASIMTNLPMVTRGIATHCAKL
Y52B11C.1	Y52B11C.1	1727	2	553	700	no	1	0	774	MHSSHLDGLHSFIWHDFVTLQRVGELCGLIDHNLYGFECCSSFSADTCT
Y105E8A.10	Y105E8A.10c.1	1729	2	1507	1648	no	1	3	2769	MSISTRRLLSQSSGQSLRLRFNRNLPTKYITQSKNPQDSIWKETGRT
Y105E8A.10	Y105E8A.10c.1	1730	2	295	601	yes	1	3	2769	MAFHVEELDAERSAVTSVVVSVNSASVQGSSSTKSTLSPPINSFFPYGKMIGVSIKKSCQQPTFNGHPGNFPRGISNFPRKMCIIGGYSPARGPLFGYPSLS
Y105E8A.10	Y105E8A.10c.1	1731	2	73	226	no	1	3	2769	MNGSRPRPCLEPDGKLEETGNQRTSGYRLIGRHPIRSTRHFHSFVDILCTG
Y105E8A.10	Y105E8A.10c.1	1732	2	685	823	no	1	3	2769	MLKMAARRAGNTRSLSLLRLGMEPEIEDGNEKPSVLESNLRLRRRA
Y105E8A.10	Y105E8A.10c.1	1733	2	2026	2146	no	1	3	2769	MMRLSSCSGILSKKRKRYSSTLYGQEPTSDSVSDPVVEKQ
Y105E8A.10	Y105E8A.10b	1735	1	159	312	no	3	65	2855	MNGSRPRPCLEPDGKLEETGNQRTSGYRLIGRHPIRSTRHFHSFVDILCTG
Y105E8A.10	Y105E8A.10b	1736	1	1593	1734	no	3	65	2855	MSISTRRLLSQSSGQSLRLRFNRNLPTKYITQSKNPQDSIWKETGRT
Y105E8A.10	Y105E8A.10b	1737	1	771	909	no	3	65	2855	MLKMAARRAGNTRSLSLLRLGMEPEIEDGNEKPSVLESNLRLRRRA
Y105E8A.10	Y105E8A.10b	1738	1	2112	2232	no	3	65	2855	MMRLSSCSGILSKKRKRYSSTLYGQEPTSDSVSDPVVEKQ
Y105E8A.10	Y105E8A.10b	1739	1	381	687	yes	3	65	2855	MAFHVEELDAERSAVTSVVVSVNSASVQGSSSTKSTLSPPINSFFPYGKMIGVSIKKSCQQPTFNGHPGNFPRGISNFPRKMCIIGGYSPARGPLFGYPSLS
Y105E8A.10	Y105E8A.10c.2	1741	3	359	665	yes	2	67	2833	MAFHVEELDAERSAVTSVVVSVNSASVQGSSSTKSTLSPPINSFFPYGKMIGVSIKKSCQQPTFNGHPGNFPRGISNFPRKMCIIGGYSPARGPLFGYPSLS
Y105E8A.10	Y105E8A.10c.2	1742	3	2090	2210	no	2	67	2833	MMRLSSCSGILSKKRKRYSSTLYGQEPTSDSVSDPVVEKQ
Y105E8A.10	Y105E8A.10c.2	1743	3	749	887	no	2	67	2833	MLKMAARRAGNTRSLSLLRLGMEPEIEDGNEKPSVLESNLRLRRRA
Y105E8A.10	Y105E8A.10c.2	1744	3	137	290	no	2	67	2833	MNGSRPRPCLEPDGKLEETGNQRTSGYRLIGRHPIRSTRHFHSFVDILCTG
Y105E8A.10	Y105E8A.10c.2	1745	3	1571	1712	no	2	67	2833	MSISTRRLLSQSSGQSLRLRFNRNLPTKYITQSKNPQDSIWKETGRT
Y105E8A.10	Y105E8A.10a	1747	2	181	334	no	1	0	2877	MNGSRPRPCLEPDGKLEETGNQRTSGYRLIGRHPIRSTRHFHSFVDILCTG
Y105E8A.10	Y105E8A.10a	1748	2	793	931	no	1	0	2877	MLKMAARRAGNTRSLSLLRLGMEPEIEDGNEKPSVLESNLRLRRRA
Y105E8A.10	Y105E8A.10a	1749	2	1615	1756	no	1	0	2877	MSISTRRLLSQSSGQSLRLRFNRNLPTKYITQSKNPQDSIWKETGRT
Y105E8A.10	Y105E8A.10a	1750	2	403	709	yes	1	0	2877	MAFHVEELDAERSAVTSVVVSVNSASVQGSSSTKSTLSPPINSFFPYGKMIGVSIKKSCQQPTFNGHPGNFPRGISNFPRKMCIIGGYSPARGPLFGYPSLS
Y105E8A.10	Y105E8A.10a	1751	2	2134	2254	no	1	0	2877	MMRLSSCSGILSKKRKRYSSTLYGQEPTSDSVSDPVVEKQ
Y105E8A.10	Y105E8A.10c.3	1753	1	687	825	no	3	5	2771	MLKMAARRAGNTRSLSLLRLGMEPEIEDGNEKPSVLESNLRLRRRA
Y105E8A.10	Y105E8A.10c.3	1754	1	75	228	no	3	5	2771	MNGSRPRPCLEPDGKLEETGNQRTSGYRLIGRHPIRSTRHFHSFVDILCTG
Y105E8A.10	Y105E8A.10c.3	1755	1	1509	1650	no	3	5	2771	MSISTRRLLSQSSGQSLRLRFNRNLPTKYITQSKNPQDSIWKETGRT
Y105E8A.10	Y105E8A.10c.3	1756	1	2028	2148	no	3	5	2771	MMRLSSCSGILSKKRKRYSSTLYGQEPTSDSVSDPVVEKQ
Y105E8A.10	Y105E8A.10c.3	1757	1	297	603	yes	3	5	2771	MAFHVEELDAERSAVTSVVVSVNSASVQGSSSTKSTLSPPINSFFPYGKMIGVSIKKSCQQPTFNGHPGNFPRGISNFPRKMCIIGGYSPARGPLFGYPSLS
C53H9.1	C53H9.1.2	1759	2	268	445	no	1	6	414	MSPSIRPTSTRRHSRLRPRRERPSSKSSPSSRSVTRPERTSGSSPNCDSKPHFFLFCSE
C53H9.1	C53H9.1.1	1761	1	270	447	no	3	8	416	MSPSIRPTSTRRHSRLRPRRERPSSKSSPSSRSVTRPERTSGSSPNCDSKPHFFLFCSE
R06C1.3	R06C1.3b	1763	2	601	724	no	1	0	651	MMIQVVKKELMMMNGMINCSLLCRFTQISCTPRGEDSTDFG
R06C1.3	R06C1.3a	1765	2	613	772	no	1	0	1404	MICSIGIDRLVDHGLISRMKFSRSRRNIRLRRLSGFSLTLKISTPPTWLPQSE
R06C1.3	R06C1.3a	1766	2	1354	1477	no	1	0	1404	MMIQVVKKELMMMNGMINCSLLCRFTQISCTPRGEDSTDFG
C34B2.7	C34B2.7.1	1771	1	837	978	no	2	4	1924	MFDHRRITRRGWIFGQFARRTIYGKICTECQGFSVKRCCFKSHDYGN
C34B2.7	C34B2.7.1	1772	3	980	1109	no	2	4	1924	MKEEESDQTKIIFTFNCIIFQLNSFNNDCQESRKPLKSLLVWM
C34B2.7	C34B2.7.1	1773	3	701	842	yes	2	4	1924	MEELTSRVHLLTLVLVMEPLLPLVQVFVILIWSLFNSIQLESTELDV
C34B2.7	C34B2.7.1	1774	3	1715	1847	no	2	4	1924	MISKKELTNMTTAIHLRDSRKNRLISTGASIPSSVSIRKLELLI
C34B2.7	C34B2.7.1	1775	3	458	596	no	2	4	1924	MISVVEDRLTVLAVWPIELDTHFFIPSTVHLFNTTVIILSSISLWI
C34B2.7	C34B2.7.2	1777	1	1752	1884	no	3	41	1961	MISKKELTNMTTAIHLRDSRKNRLISTGASIPSSVSIRKLELLI
C34B2.7	C34B2.7.2	1778	1	1017	1146	no	3	41	1961	MKEEESDQTKIIFTFNCIIFQLNSFNNDCQESRKPLKSLLVWM
C34B2.7	C34B2.7.2	1779	1	495	633	no	3	41	1961	MISVVEDRLTVLAVWPIELDTHFFIPSTVHLFNTTVIILSSISLWI
C34B2.7	C34B2.7.2	1780	1	738	879	yes	3	41	1961	MEELTSRVHLLTLVLVMEPLLPLVQVFVILIWSLFNSIQLESTELDV
C34B2.7	C34B2.7.2	1781	2	874	1015	no	3	41	1961	MFDHRRITRRGWIFGQFARRTIYGKICTECQGFSVKRCCFKSHDYGN
K03E5.3	K03E5.3	1784	2	904	1033	yes	1	0	1104	MVLTCFVRYFVIHRSDVSPRKVLSLIATFYRTVSPKTGRVSLI
T19B4.1	T19B4.1	1786	1	1521	1653	no	3	0	1991	MENEFVNLACQEKMLDNLIFHMILFLILLEGYLLLIEKMDEFNI
T19B4.1	T19B4.1	1787	1	957	1215	yes	3	0	1991	MVSNYFHLVLNSNIMLINQKFHLVLYKKLFMRIWVVLNLDKLLVWHSIMNNNYSFSKELEEFGMQVHSTTTIFCSTKNQSLIQSFL
T19B4.1	T19B4.1	1788	1	183	402	no	3	0	1991	MLLHLNRWLMRIVCITCFSMVAQCQQASKDSGEEWKHVDGEEEAIFSMHGLEMLQTLFYQKMWHSQWVMSKME
T19B4.1	T19B4.1	1789	1	1668	1818	no	3	0	1991	MLLKNLSLQCSQISILLLVTRIMFSWFQEDPLWDMKPKESLYLSEDLVLV
Y110A7A.16	Y110A7A.16	1791	1	342	531	no	3	5	3755	MSKHLLLLIIKPFILQILLLFLLQKDHSSSRKMKENLHQLMLVGALRAHNSEDPPANLSQERK
Y110A7A.16	Y110A7A.16	1792	1	795	1008	no	3	5	3755	MKEMVKQEIAMSSNGRQTRLKIEELSRKLNGIPLEPFCQCRLLWERSINLNSGISPITNLPENVIGSSRNQ
Y110A7A.16	Y110A7A.16	1793	1	1143	1356	no	3	5	3755	MNFGCIHCVGELCLHQCVIIQFNVYLILSLIQRQLITFMLSHRIGKSFHVCYFSKKKRETTVIHFLEKNIF
Y110A7A.16	Y110A7A.16	1794	1	1422	1629	no	3	5	3755	MDTNSTATVLQLMKYYTLRLRKGLSVDLCTMSHQNHTLFGTLATENIKSVELVLIQKKSSKEKILGGLE
Y110A7A.16	Y110A7A.16	1795	1	3558	3840	no	3	5	3755	MMNLPRSFRKAKLQSGLKACRFSIFQDHFMHCLTQTKSRRLSQCLPYSGLNLNLSLLHLHLLQFSHKLLILFSCIVLLLTVLLLLVTKVFIHKX
T08B2.5	T08B2.5a	1797	1	2709	2853	yes	3	0	2774	MVQKRVTKRRRGKHSTVVITTLKFLKFMFRLQCTICFPLNKIKSNSLX
T08B2.5	T08B2.5a	1798	1	441	684	no	3	0	2774	MTAAAVVEEIEVTREAVHHLRLQMVPLIGRRQTATPDDDAPEATAEKGIETRVAMIAAAIFQIMIDIRIGILEFHQINSQF
T08B2.5	T08B2.5a	1799	1	2058	2469	no	3	0	2774	MMTKKRIKRKKFGVVVLKNRLLHPHFHLFHLLLGNPLFKMLEMLWKEHFTMKRRKHVCSANEHSLMLKYFGNMLKKVICIETIWKRSEPNGDEKQLLNYKKKKKMLQLQISLRSFTGTEPKNVVVSSGLIPLVMHSM
T08B2.5	T08B2.5a	1800	1	27	189	no	3	0	2774	MMTGKGFKMRRVTMILPTISAKWKTITNNTKNRGLPIRFTTPLEDLIWLQCKHV
T08B2.5	T08B2.5f	1802	2	2686	2830	yes	1	237	2751	MVQKRVTKRRRGKHSTVVITTLKFLKFMFRLQCTICFPLNKIKSNSLX
T08B2.5	T08B2.5f	1803	2	2035	2446	no	1	237	2751	MMTKKRIKRKKFGVVVLKNRLLHPHFHLFHLLLGNPLFKMLEMLWKEHFTMKRRKHVCSANEHSLMLKYFGNMLKKVICIETIWKRSEPNGDEKQLLNYKKKKKMLQLQISLRSFTGTEPKNVVVSSGLIPLVMHSM
T08B2.5	T08B2.5f	1804	2	418	661	no	1	237	2751	MTAAAVVEEIEVTREAVHHLRLQMVPLIGRRQTATPDDDAPEATAEKGIETRVAMIAAAIFQIMIDIRIGILEFHQINSQF
T08B2.5	T08B2.5c	1806	3	2252	2663	no	2	370	2968	MMTKKRIKRKKFGVVVLKNRLLHPHFHLFHLLLGNPLFKMLEMLWKEHFTMKRRKHVCSANEHSLMLKYFGNMLKKVICIETIWKRSEPNGDEKQLLNYKKKKKMLQLQISLRSFTGTEPKNVVVSSGLIPLVMHSM
T08B2.5	T08B2.5c	1807	3	2903	3047	yes	2	370	2968	MVQKRVTKRRRGKHSTVVITTLKFLKFMFRLQCTICFPLNKIKSNSLX
T08B2.5	T08B2.5c	1808	3	122	314	no	2	370	2968	MLPFVFNADDDGKRVQNEEGNYDPTDHQRQMEDYYKQYEEQRVCDLRIRLAEKFKLLKLMLILF
T08B2.5	T08B2.5c	1809	3	635	878	no	2	370	2968	MTAAAVVEEIEVTREAVHHLRLQMVPLIGRRQTATPDDDAPEATAEKGIETRVAMIAAAIFQIMIDIRIGILEFHQINSQF
T08B2.5	T08B2.5b	1811	3	29	194	no	2	4	2779	MMTGKGFKMRRVTMILPTISAKWKTITNNTKNRGRLPIRFTTPLEDLIWLQCKHV
T08B2.5	T08B2.5b	1812	3	446	689	no	2	4	2779	MTAAAVVEEIEVTREAVHHLRLQMVPLIGRRQTATPDDDAPEATAEKGIETRVAMIAAAIFQIMIDIRIGILEFHQINSQF
T08B2.5	T08B2.5b	1813	3	2063	2474	no	2	4	2779	MMTKKRIKRKKFGVVVLKNRLLHPHFHLFHLLLGNPLFKMLEMLWKEHFTMKRRKHVCSANEHSLMLKYFGNMLKKVICIETIWKRSEPNGDEKQLLNYKKKKKMLQLQISLRSFTGTEPKNVVVSSGLIPLVMHSM
T08B2.5	T08B2.5b	1814	3	2714	2858	yes	2	4	2779	MVQKRVTKRRRGKHSTVVITTLKFLKFMFRLQCTICFPLNKIKSNSLX
T08B2.5	T08B2.5d	1816	1	27	189	no	3	0	491	MMTGKGFKMRRVTMILPTISAKWKTITNNTKNRGLPIRFTTPLEDLIWLQCKHV
T08B2.5	T08B2.5g	1818	1	2271	2415	yes	3	251	2336	MVQKRVTKRRRGKHSTVVITTLKFLKFMFRLQCTICFPLNKIKSNSLX
T08B2.5	T08B2.5g	1819	1	72	246	no	3	251	2336	MVPLIGRRQTATPDDDAPEATAEKGIETRVAMIAAAIFQIMIDIRIGILEFHQINSQF
T08B2.5	T08B2.5g	1820	1	1620	2031	no	3	251	2336	MMTKKRIKRKKFGVVVLKNRLLHPHFHLFHLLLGNPLFKMLEMLWKEHFTMKRRKHVCSANEHSLMLKYFGNMLKKVICIETIWKRSEPNGDEKQLLNYKKKKKMLQLQISLRSFTGTEPKNVVVSSGLIPLVMHSM
T08B2.5	T08B2.5e	1822	3	41	203	no	2	16	568	MMTGKGFKMRRVTMILPTISAKWKTITNNTKNRGLPIRFTTPLEDLIWLQCKHV
T01G9.3	T01G9.3	1824	3	1052	1247	yes	1	78	1887	MVGMGTRRADFDCIVRKFLEKFRGVMDLYIEVVDSSRTGLQPHQIHPGTAAVSLLPPDFIEHFRK
C55B7.1	C55B7.1	1826	2	1456	1687	no	1	0	2922	MSVPIQPSQGKVLKEKDRRRHTFQSKTTWKKFLTCRKFRKVSCSTSFLMLKLKSRLIKNPLELRLVRRSPKLIWAKQ
C55B7.1	C55B7.1	1827	2	1018	1357	yes	1	0	2922	MVNLASVREVLVVTRMDSEAAVGDKIEAKGIIIVSIVSSQDIDRMTVQSRKRKGNPECATIVNSPVTTLAIVRKSGNRVKAAMDSPLVSEEEMMVDSVAEMLKASVITRNVVR
C55B7.1	C55B7.1	1828	2	1696	1840	no	1	0	2922	MSHMQATLRPLQFNNILFHLFIKDMISWLVLKLVQEKPLHSFCQSWLV
C55B7.1	C55B7.1	1829	2	124	604	no	1	0	2922	MQAGRDLVVATMVDLDSAVITTLDPDSAMEMLVELDSAVEMLVELDSAVEMLVELDSAVEMLVELGSAAEMLVELDSAVEMLVELDSAVEMLVELDWAVEMLVELDSAVEMLVELDSAVEMLVELDSAVEKLVELDSAVEKLVELDLAVIATVDLVLVAD
C55B7.1	C55B7.1	1830	2	610	991	no	1	0	2922	MDLVVATIMNLGLVEENQEVSVEATLVEVASVQEVTRMDSEVVVGDKIEAKGIIIVSIASSQDIDRMTVQSRKRKGNPECVTIASSLVTTLAIVQKSGNRVKAEMDSPVEALVSEEEMVVELDSTVD
C55B7.1	C55B7.1	1831	2	2593	2974	yes	1	0	2922	MDRNLFLLLLRLPNVDLISKEWIMSSTMTCQTTLMTTFIVLEERVELETLEEPPVSSLKIVIFCPNLFAFSLTRINWFQSGCKELQGEISELVLDSKAAFQLKSKMKIAGRCICISFKCCPYCISKL
C55B7.1	C55B7.1	1832	2	2149	2281	no	1	0	2922	MLWDSELTSIQLSIMRACRRKKIVRHSCSVLLSPILYRKQLEII
T23H4.1	T23H4.1b	1834	2	1180	1306	no	1	0	1404	MQQSERFWKIKVTVTTMIDLLLLVVYLLNQVCDGKHQFWFLS
T23H4.1	T23H4.1b	1835	2	406	613	no	1	0	1404	MTNQEFDSKILWDLQTTKQMWFQLNELQIFVDFQLICHPFLNIDSELERSIPTIIRYSEFSTFATTNHI
T23H4.1	T23H4.1a	1837	2	451	658	no	1	0	1449	MTNQEFDSKILWDLQTTKQMWFQLNELQIFVDFQLICHPFLNIDSELERSIPTIIRYSEFSTFATTNHI
T23H4.1	T23H4.1a	1838	2	1225	1351	no	1	0	1449	MQQSERFWKIKVTVTTMIDLLLLVVYLLNQVCDGKHQFWFLS
T23H4.1	T23H4.1c	1840	2	373	580	no	1	0	1371	MTNQEFDSKILWDLQTTKQMWFQLNELQIFVDFQLICHPFLNIDSELERSIPTIIRYSEFSTFATTNHI
T23H4.1	T23H4.1c	1841	2	1147	1273	no	1	0	1371	MQQSERFWKIKVTVTTMIDLLLLVVYLLNQVCDGKHQFWFLS
Y48G8AL.5	Y48G8AL.5	1844	1	864	984	yes	2	40	1957	MDSTRWSWITSNADCNREKRSSTTESRRANGLFDVLNESD
Y48G8AL.5	Y48G8AL.5	1845	3	1394	1523	no	2	40	1957	MRDGMIFVITTESMNHSCTKTYSVAASNQTMRTVVNCSMQMTP
Y48G8AL.5	Y48G8AL.5	1846	3	305	515	no	2	40	1957	MRWKIDFSGKSWKPETLLYVFQKVFHGTKKPIKRQCHVPLSEVIRSLHNFTISLSQRLNSEICPDRRRFQ
Y48G8AL.5	Y48G8AL.5	1847	3	86	299	no	2	40	1957	MSREKMFGVTIVMLQAIRDIVWWRRRMKSIGNIIRSRMSFHWSNLTSFGRLFNEICLFLSDFRVVIKTASS
Y48G8AL.5	Y48G8AL.5	1848	3	1763	1907	no	2	40	1957	MFGNNRMVLLSFIVMTMNLSVLGSVFMHFYRFSEGNIWEKIVKFKRKI
Y105E8A.32	Y105E8A.32	1850	2	238	364	no	1	0	360	MYLMRQEIVCHWSLGLLEVDMMILYAHFRWPIVVGSMRICSX
Y18D10A.23	Y18D10A.23	1852	3	1397	1538	no	1	0	1509	MLRELVQRRVQEHEGGWIVALLRSIQEYQCLWRSVCCINVFLYCAIX
Y18D10A.23	Y18D10A.23	1853	3	119	362	no	1	0	1509	MAYGSRVHCWRHDGRWYDLSSIGARKIRPDSRMCSHPASLNFFGIHWNSAWRELGNDADPLAKIPYPLSTAVSRDGLQGVG
C25A1.5	C25A1.5.2	1855	3	971	1157	no	2	10	958	MFFRKICCLLSELCLTFFISKSLVPIHFSHDPLYPLYIYIYRFTFSFLVRQISSTCFHILSI
C25A1.5	C25A1.5.1	1857	1	969	1155	no	3	8	956	MFFRKICCLLSELCLTFFISKSLVPIHFSHDPLYPLYIYIYRFTFSFLVRQISSTCFHILSI
Y71G12B.16	Y71G12B.16	1859	2	958	1132	no	1	60	1284	MCRKRLRKIAAKTLATSECSSTRVFLISCSQATTIWYTFLAPLSQTSVDWLRITSNRM
Y71G12B.16	Y71G12B.16	1860	3	380	509	no	1	60	1284	MLFQSTSIEPETQVLQPFRGSSPNNVQWLRANLLGGGSPSSGG
F47G4.2	F47G4.2	1862	2	2137	2260	no	1	45	2175	MLRRKTFGSCFTGRSNGSNSTTLIYNCISLLINYICNYKMX
T02E1.2	T02E1.2	1865	1	1557	1689	no	3	8	1712	MHSEIVVIDGLPRITTQNGPMFRKSRSTHSTAHFTILSETTRRT
T02E1.2	T02E1.2	1866	1	1764	2004	no	3	8	1712	MHVSSENLKNYRHIPKIARSFHSETFQTSLPGCFSFFLIVTIISSKSTLSKSKSTIPIDEIFLLLILESEIGEFPIKVCC
T02E1.2	T02E1.2	1867	2	472	613	yes	3	8	1712	MASRHIRSNCRKFQSFRQLELQTMLITSILGRSSDSIHQYASRYGVL
C50F2.7	C50F2.7	1869	3	236	377	no	2	49	472	MELKALLQLDHLFQQAHLVLKSRQRLLNLENQGLHLSLLGHFSSVSS
F02E9.10	F02E9.10a.1	1871	1	642	861	no	3	8	1361	MRRDFCQLVTTDSSNCIHSVNSLKRIHLDLQKPSESILHMTLQSPVSRLTRNLEERDSRVHQLHLKYSSGILR
F02E9.10	F02E9.10a.1	1872	1	63	288	no	3	8	1361	MKKHTIDRLLEYGHSDSVVKSGCFQCHTIVQNFGYCKKILRTTFHLMREWFWQNGELQFKQLIFLLMENIWLPLE
F02E9.10	F02E9.10a.1	1873	1	1110	1455	no	3	8	1361	MSMTNKKMSHRATTLKKEDMNIIGHMKNTTLLNIKSIIRTQSHEHHHVKMMRKLEIMCTTVLQNISKIMNLPLHQHMNNMIHRPDNLFSRIVLFIFLFFSTLTEISSFSFLCYAV
F02E9.10	F02E9.10b.2	1875	3	929	1274	no	2	19	1180	MSMTNKKMSHRATTLKKEDMNIIGHMKNTTLLNIKSIIRTQSHEHHHVKMMRKLEIMCTTVLQNISKIMNLPLHQHMNNMIHRPDNLFSRIVLFIFLFFSTLTEISSFSFLCYAV
F02E9.10	F02E9.10b.2	1876	3	461	680	no	2	19	1180	MRRDFCQLVTTDSSNCIHSVNSLKRIHLDLQKPSESILHMTLQSPVSRLTRNLEERDSRVHQLHLKYSSGILR
F02E9.10	F02E9.10b.2	1877	3	74	299	no	2	19	1180	MKKHTIDRLLEYGHSDSVVKSGCFQCHTIVQNFGYCKKILRTTFHLMREWFWQNGELQFKQLIFLLMENIWLPLE
F02E9.10	F02E9.10a.2	1879	3	653	872	no	2	19	1372	MRRDFCQLVTTDSSNCIHSVNSLKRIHLDLQKPSESILHMTLQSPVSRLTRNLEERDSRVHQLHLKYSSGILR
F02E9.10	F02E9.10a.2	1880	3	1121	1466	no	2	19	1372	MSMTNKKMSHRATTLKKEDMNIIGHMKNTTLLNIKSIIRTQSHEHHHVKMMRKLEIMCTTVLQNISKIMNLPLHQHMNNMIHRPDNLFSRIVLFIFLFFSTLTEISSFSFLCYAV
F02E9.10	F02E9.10a.2	1881	3	74	299	no	2	19	1372	MKKHTIDRLLEYGHSDSVVKSGCFQCHTIVQNFGYCKKILRTTFHLMREWFWQNGELQFKQLIFLLMENIWLPLE
F02E9.10	F02E9.10b.1	1883	1	918	1263	no	3	8	1169	MSMTNKKMSHRATTLKKEDMNIIGHMKNTTLLNIKSIIRTQSHEHHHVKMMRKLEIMCTTVLQNISKIMNLPLHQHMNNMIHRPDNLFSRIVLFIFLFFSTLTEISSFSFLCYAV
F02E9.10	F02E9.10b.1	1884	1	450	669	no	3	8	1169	MRRDFCQLVTTDSSNCIHSVNSLKRIHLDLQKPSESILHMTLQSPVSRLTRNLEERDSRVHQLHLKYSSGILR
F02E9.10	F02E9.10b.1	1885	1	63	288	no	3	8	1169	MKKHTIDRLLEYGHSDSVVKSGCFQCHTIVQNFGYCKKILRTTFHLMREWFWQNGELQFKQLIFLLMENIWLPLE
F02E9.10	F02E9.10c.1	1887	1	642	861	no	3	8	1373	MRRDFCQLVTTDSSNCIHSVNSLKRIHLDLQKPSESILHMTLQSPVSRLTRNLEERDSRVHQLHLKYSSGILR
F02E9.10	F02E9.10c.1	1888	1	1110	1479	no	3	8	1373	MSMTNKKMSHRATTLKKEDMNIIGHMKNTTKMLQLLNIKSIIRTQSHEHHHVKMMRKLEIMCTTVLQNISKIMNLPLHQHMNNMIHRPDNLFSRIVLFIFLFFSTLTEISSFSFLCYAVALNE
F02E9.10	F02E9.10c.1	1889	1	63	288	no	3	8	1373	MKKHTIDRLLEYGHSDSVVKSGCFQCHTIVQNFGYCKKILRTTFHLMREWFWQNGELQFKQLIFLLMENIWLPLE
F02E9.10	F02E9.10c.2	1891	3	1121	1490	no	2	19	1384	MSMTNKKMSHRATTLKKEDMNIIGHMKNTTKMLQLLNIKSIIRTQSHEHHHVKMMRKLEIMCTTVLQNISKIMNLPLHQHMNNMIHRPDNLFSRIVLFIFLFFSTLTEISSFSFLCYAVALNE
F02E9.10	F02E9.10c.2	1892	3	653	872	no	2	19	1384	MRRDFCQLVTTDSSNCIHSVNSLKRIHLDLQKPSESILHMTLQSPVSRLTRNLEERDSRVHQLHLKYSSGILR
F02E9.10	F02E9.10c.2	1893	3	74	299	no	2	19	1384	MKKHTIDRLLEYGHSDSVVKSGCFQCHTIVQNFGYCKKILRTTFHLMREWFWQNGELQFKQLIFLLMENIWLPLE
F36A2.4	F36A2.4	1895	2	322	454	no	1	15	1839	MMRIHPLGILQIRYSSPQQCLLRLVTGMWHQAHLEVDFLELFIA
F36A2.4	F36A2.4	1896	2	1591	1717	no	1	15	1839	MEDGWSSLIFDSTGSTCLALRQFSKMDRDLHYLVHYLSKLTR
B0261.4	B0261.4a	1898	1	513	681	no	3	110	812	MMRSSVWKLENPRLHAREQSLHSLDLHIKNKPQNTLHHLNSARKNTKLHISTTMPT
B0261.4	B0261.4b	1900	1	513	681	no	3	164	812	MMRSSVWKLENPRLHAREQSLHSLDLHIKNKPQNTLHHLNSARKNTKLHISTTMPT
F53F10.3	F53F10.3.1	1902	1	126	312	no	3	29	428	MRPVRKLYFSGPQPSNGLLSALDSLIWPDLLISFLFIRTLLSSPLEPSGRDIALSSPQSTTI
F53F10.3	F53F10.3.2	1904	2	115	301	no	1	18	417	MRPVRKLYFSGPQPSNGLLSALDSLIWPDLLISFLFIRTLLSSPLEPSGRDIALSSPQSTTI
F58D5.1	F58D5.1a.2	1906	3	1424	1832	yes	2	10	1843	MDNVVDNVEVVSGVEMLDQEVIIQITSTMATTCQCLGEVATVVTWDMVHMEEVTVVDTVAREPMEILEPTEAVDLEEECVDRREEEWAVEEDSVVDHLDAVEWQTDAVEESARETDEGDQHRNETTESLISRLTST
F58D5.1	F58D5.1a.1	1908	3	1424	1832	yes	2	10	1843	MDNVVDNVEVVSGVEMLDQEVIIQITSTMATTCQCLGEVATVVTWDMVHMEEVTVVDTVAREPMEILEPTEAVDLEEECVDRREEEWAVEEDSVVDHLDAVEWQTDAVEESARETDEGDQHRNETTESLISRLTST
F58D5.1	F58D5.1b.2	1910	2	43	313	yes	1	0	324	MVHMEEVTVVDTVAREPMEILEPTEAVDLEEECVDRREEEWAVEEDSVVDHLDAVEWQTDAVEESARETDEGDQHRNETTESLISRLTST
F58D5.1	F58D5.1a.3	1912	2	1426	1834	yes	1	12	1845	MDNVVDNVEVVSGVEMLDQEVIIQITSTMATTCQCLGEVATVVTWDMVHMEEVTVVDTVAREPMEILEPTEAVDLEEECVDRREEEWAVEEDSVVDHLDAVEWQTDAVEESARETDEGDQHRNETTESLISRLTST
F58D5.1	F58D5.1b.1	1914	3	8	332	yes	2	19	343	MATTCQCLGEVATVVTWDMVHMEEVTVVDTVAREPMEILEPTEAVDLEEECVDRREEEWAVEEDSVVDHLDAVEWQTDAVEESARETDEGDQHRNETTESLISRLTST
C31H5.3	C31H5.3a	1916	1	660	780	no	3	35	1697	MNAARSHIMMSRLLFQLGGELSIMDSTYCSHVCSFPHWLC
C31H5.3	C31H5.3b	1918	2	643	763	no	1	0	1680	MNAARSHIMMSRLLFQLGGELSIMDSTYCSHVCSFPHWLC
C36B1.7	C36B1.7	1920	1	186	336	no	3	155	722	MPKEELAKMACCHGESRKTCSISRLLPKMFLISRREMQFSWDENAGKAFQ
C36B1.7	C36B1.7	1921	2	700	832	no	3	155	722	MEGCREPLNFFLKLLFIFLIYMYSFTCCLLGQPTIFTCKYKICT
C36B1.8	C36B1.8c.1	1925	1	960	1083	no	3	101	3125	MNGIRWSLCVNLFLSCLQPIFACLEIVSKDLFVAITIKCGQ
C36B1.8	C36B1.8c.1	1926	1	2250	2469	no	3	101	3125	MSSDNREVKNIFIKDALHPTLHLTMITKSFQRAHLQWRRLLQTESVLFHVLLVMRLQLNMFNTSMNFLTCQLE
C36B1.8	C36B1.8c.1	1927	1	3486	3624	no	3	101	3125	MLVISLFRLGIHFFNLYIFLFIYTYIFLTTPSSTFKNNIVDFLFFL
C36B1.8	C36B1.8c.1	1928	1	2622	2919	no	3	101	3125	MQQEALTRLNCLSICNHSFIQISRKHKCRRCSQVALIVAVLTLRNTVKNKHCYRRKVIIELVQTGKVLSKMVELPLPIHTLQFMQTSPMQYTLKIRKQC
C36B1.8	C36B1.8c.1	1929	1	1989	2223	no	3	101	3125	MRMILIPTMNQRKNLSHYQVLWVRVSRVIQFSRRHQFREHSLSFDLLDDKLRRTIIFSAWRFIGVMVTEHLLKDLVIN
C36B1.8	C36B1.8c.1	1930	1	591	777	no	3	101	3125	MLAEISRTERIRIVIIRTKVIEVATHITTIIITRWKMLNLLDFCQILPYPLRDKYQRLLLLQ
C36B1.8	C36B1.8c.2	1932	1	3453	3591	no	3	68	3092	MLVISLFRLGIHFFNLYIFLFIYTYIFLTTPSSTFKNNIVDFLFFL
C36B1.8	C36B1.8c.2	1933	1	927	1050	no	3	68	3092	MNGIRWSLCVNLFLSCLQPIFACLEIVSKDLFVAITIKCGQ
C36B1.8	C36B1.8c.2	1934	1	558	744	no	3	68	3092	MLAEISRTERIRIVIIRTKVIEVATHITTIIITRWKMLNLLDFCQILPYPLRDKYQRLLLLQ
C36B1.8	C36B1.8c.2	1935	1	2217	2436	no	3	68	3092	MSSDNREVKNIFIKDALHPTLHLTMITKSFQRAHLQWRRLLQTESVLFHVLLVMRLQLNMFNTSMNFLTCQLE
C36B1.8	C36B1.8c.2	1936	1	2589	2886	no	3	68	3092	MQQEALTRLNCLSICNHSFIQISRKHKCRRCSQVALIVAVLTLRNTVKNKHCYRRKVIIELVQTGKVLSKMVELPLPIHTLQFMQTSPMQYTLKIRKQC
C36B1.8	C36B1.8c.2	1937	1	1956	2190	no	3	68	3092	MRMILIPTMNQRKNLSHYQVLWVRVSRVIQFSRRHQFREHSLSFDLLDDKLRRTIIFSAWRFIGVMVTEHLLKDLVIN
C36B1.8	C36B1.8b	1939	2	3517	3655	no	1	0	3156	MLVISLFRLGIHFFNLYIFLFIYTYIFLTTPSSTFKNNIVDFLFFL
C36B1.8	C36B1.8b	1940	2	622	808	no	1	0	3156	MLAEISRTERIRIVIIRTKVIEVATHITTIIITRWKMLNLLDFCQILPYPLRDKYQRLLLLQ
C36B1.8	C36B1.8b	1941	2	2281	2500	no	1	0	3156	MSSDNREVKNIFIKDALHPTLHLTMITKSFQRAHLQWRRLLQTESVLFHVLLVMRLQLNMFNTSMNFLTCQLE
C36B1.8	C36B1.8b	1942	2	2653	2950	no	1	0	3156	MQQEALTRLNCLSICNHSFIQISRKHKCRRCSQVALIVAVLTLRNTVKNKHCYRRKVIIELVQTGKVLSKMVELPLPIHTLQFMQTSPMQYTLKIRKQC
C36B1.8	C36B1.8b	1943	2	991	1114	no	1	0	3156	MNGIRWSLCVNLFLSCLQPIFACLEIVSKDLFVAITIKCGQ
C36B1.8	C36B1.8b	1944	2	2020	2254	no	1	0	3156	MRMILIPTMNQRKNLSHYQVLWVRVSRVIQFSRRHQFREHSLSFDLLDDKLRRTIIFSAWRFIGVMVTEHLLKDLVIN
C36B1.8	C36B1.8a	1946	2	3508	3646	no	1	0	3147	MLVISLFRLGIHFFNLYIFLFIYTYIFLTTPSSTFKNNIVDFLFFL
C36B1.8	C36B1.8a	1947	2	622	808	no	1	0	3147	MLAEISRTERIRIVIIRTKVIEVATHITTIIITRWKMLNLLDFCQILPYPLRDKYQRLLLLQ
C36B1.8	C36B1.8a	1948	2	2281	2500	no	1	0	3147	MSSDNREVKNIFIKDALHPTLHLTMITKSFQRAHLQWRRLLQTESVLFHVLLVMRLQLNMFNTSMNFLTCQLE
C36B1.8	C36B1.8a	1949	2	2644	2941	no	1	0	3147	MQQEALTRLNCLSICNHSFIQISRKHKCRRCSQVALIVAVLTLRNTVKNKHCYRRKVIIELVQTGKVLSKMVELPLPIHTLQFMQTSPMQYTLKIRKQC
C36B1.8	C36B1.8a	1950	2	991	1114	no	1	0	3147	MNGIRWSLCVNLFLSCLQPIFACLEIVSKDLFVAITIKCGQ
C36B1.8	C36B1.8a	1951	2	2020	2254	no	1	0	3147	MRMILIPTMNQRKNLSHYQVLWVRVSRVIQFSRRHQFREHSLSFDLLDDKLRRTIIFSAWRFIGVMVTEHLLKDLVIN
C24A11.8	C24A11.8b	1953	2	439	565	no	1	6	1935	MDVCTVRPLQLLNLLLSFYKHNLEIIMRKSMLETMLADINYF
C24A11.8	C24A11.8b	1954	2	2215	2365	no	1	6	1935	MYPIINHRLMTQNSKGMNPCQMHSPHLFPYPDIKRMYAFPSFEMFIKGIX
C24A11.8	C24A11.8c	1956	2	439	565	no	1	6	2022	MDVCTVRPLQLLNLLLSFYKHNLEIIMRKSMLETMLADINYF
C24A11.8	C24A11.8c	1957	2	2302	2452	no	1	6	2022	MYPIINHRLMTQNSKGMNPCQMHSPHLFPYPDIKRMYAFPSFEMFIKGIX
C24A11.8	C24A11.8a.2	1959	2	415	541	no	1	6	1911	MDVCTVRPLQLLNLLLSFYKHNLEIIMRKSMLETMLADINYF
C24A11.8	C24A11.8a.2	1960	2	2191	2341	no	1	6	1911	MYPIINHRLMTQNSKGMNPCQMHSPHLFPYPDIKRMYAFPSFEMFIKGIX
C24A11.8	C24A11.8a.1	1962	1	2241	2391	no	3	56	1961	MYPIINHRLMTQNSKGMNPCQMHSPHLFPYPDIKRMYAFPSFEMFIKGIX
C24A11.8	C24A11.8a.1	1963	1	465	591	no	3	56	1961	MDVCTVRPLQLLNLLLSFYKHNLEIIMRKSMLETMLADINYF
T02G6.5	T02G6.5d	1966	2	211	343	no	1	0	972	MERTKGCFHLQILTIGFERFVNIKKSKKSSAAFPTPILKSFIIC
T02G6.5	T02G6.5c	1968	2	598	730	no	1	0	1359	MERTKGCFHLQILTIGFERFVNIKKSKKSSAAFPTPILKSFIIC
T02G6.5	T02G6.5b	1970	3	590	722	no	2	4	1351	MERTKGCFHLQILTIGFERFVNIKKSKKSSAAFPTPILKSFIIC
T02G6.5	T02G6.5a	1972	2	58	214	yes	1	213	1374	MDCLRFLAACCTKLRFFKVTLKFLLAIFTCGFVALFYRKKVFFPVFSSTKLS
T02G6.5	T02G6.5a	1973	2	613	745	no	1	213	1374	MERTKGCFHLQILTIGFERFVNIKKSKKSSAAFPTPILKSFIIC
F46F11.2	F46F11.2.2	1975	2	451	805	no	1	33	834	MSLDRDTATSFSLASARTASPELLSMERNPSRPMPSHRRCRRMLRRKSQESNARTEIASRRPNRKELVMPLIHRLSLNLPNLLLTLLLQTPNLVPRSSQRKLDFPRLTVATLHLEKPA
F46F11.2	F46F11.2.2	1976	2	268	430	yes	1	33	834	MASFLATMAKRTSLFTRQPLPSQPLKSSTSVPSGTMKRFSSISSRERMAQKLLT
F46F11.2	F46F11.2.1	1978	1	270	432	yes	3	35	836	MASFLATMAKRTSLFTRQPLPSQPLKSSTSVPSGTMKRFSSISSRERMAQKLLT
F46F11.2	F46F11.2.1	1979	1	453	807	no	3	35	836	MSLDRDTATSFSLASARTASPELLSMERNPSRPMPSHRRCRRMLRRKSQESNARTEIASRRPNRKELVMPLIHRLSLNLPNLLLTLLLQTPNLVPRSSQRKLDFPRLTVATLHLEKPA
C47F8.5	C47F8.5	1981	3	83	275	yes	1	0	1104	MELPKCSKFFTISCKFKRKICFRRKLHEERVEFKYNCGADHGLRHQLHHILRRHSKNLQMALPT
M05B5.6	M05B5.6	1983	2	52	199	no	1	9	1452	MKKSMTKFPLIFATNDQEFAEIKLKIPPLLFLIMRMGLVKLSTGRSFEN
M05B5.6	M05B5.6	1984	3	1412	1577	no	1	9	1452	MVDWSRLGWIFGHLSSPKFFKNWFLYYLYCSFSLFPGFSILNYRSHVDLDVFVFF
F28C12.7	F28C12.7	1987	3	887	1022	no	1	0	1017	MSSTCHLLQDKAYYSKSKISNCSHDIHVWRCRRAYCSAEEELGIX
F47B3.1	F47B3.1	1991	2	301	484	no	1	0	1089	MFHVKTRVELSSSSPVWHRTTSMPTTWARPPTPRSSSVHRAHWRTPNIRSGRWRFRRKWSA
F47B3.1	F47B3.1	1992	3	308	611	no	1	0	1089	MSRQGSNCRQVPRSGIGLHPCQLLGHGHQPQEVHLCTGPTGEHPTFVLGDGDSGESGVRDHAVQLHRNGQNKMPSVLAIGAGPEISFRRGTEHHFGCQLGC
F47B3.1	F47B3.1	1993	3	701	857	no	1	0	1089	MGELAGSWSAADQLDSNKPPFGNPWQPESHSGPLLSWNWAHRNHRRDCLRSR
Y53C10A.9	Y53C10A.9	1995	3	614	965	no	1	0	4692	MYADAGYFCCQSSGCGEKFSQAIFNYNWIAIVDVLSRTFLVRSYQKHISHHLALNSLHFFNGQLSNVCPRWNLYVYLSLRIVFYTMYFNSSIWKAYCRRNGDYLDNSYNSYASFARV
W02D3.10	W02D3.10b	1997	2	178	343	no	1	15	2853	MITNGHPWNGSLFKCVPMIVEAECLSLPTRFSHFFRYYRILQTQRISQSELSNFF
W02D3.10	W02D3.10b	1998	2	643	763	no	1	15	2853	MNFFPDQMLQIIFCSNGSKLQKTLMHLNLFLKSRLLHLLE
W02D3.10	W02D3.10a	2000	2	178	343	no	1	15	4326	MITNGHPWNGSLFKCVPMIVEAECLSLPTRFSHFFRYYRILQTQRISQSELSNFF
W02D3.10	W02D3.10a	2001	2	3913	4096	no	1	15	4326	MQNRNETKNYFQSFHTKEKLFNMEFLFFVSSLKMIDLIFRSRTIQLDIVTSESIWKFFATN
W02D3.10	W02D3.10a	2002	2	643	763	no	1	15	4326	MNFFPDQMLQIIFCSNGSKLQKTLMHLNLFLKSRLLHLLE
W02D3.10	W02D3.10a	2003	3	3758	3878	yes	1	15	4326	MGKRNVRMAEYKYSCHVGKDKIKADSCDGGRSYWILERKR
T15D6.3	T15D6.3	2005	2	856	1003	no	1	0	1173	MKDSGGLYSVTRTCSMFRDHLTSMILSQMVGAITYPDTNFGLNPSVTTI
F32H2.3	F32H2.3.1	2007	3	2015	2156	no	2	10	2482	MKTIFVHRLRFRQPQQHPHSSDVFFLEPNSLCMSFGVKKPCEPDFDC
F32H2.3	F32H2.3.1	2008	3	1259	1493	yes	2	10	2482	MVVVFRTHPSLPSFRPIMAMFHCPMDAMDGIRSVRCAQCPVLLRPRRYMQDPHFLEYQSHCEFMLNAWHSVVLQSARH
F32H2.3	F32H2.3.1	2009	3	2189	2495	no	2	10	2482	MVMTSHLSNFPMKKFFVLFQLDSPLSSPRTVICSLLLIVVSSSIFSLLQLNSVLLQAGRRKRYAATTTLLYSRQQLSVIRHLSTTLQLFPIQDFRIESKILT
F32H2.3	F32H2.3.2	2011	2	2062	2203	no	1	57	2529	MKTIFVHRLRFRQPQQHPHSSDVFFLEPNSLCMSFGVKKPCEPDFDC
F32H2.3	F32H2.3.2	2012	2	1306	1540	yes	1	57	2529	MVVVFRTHPSLPSFRPIMAMFHCPMDAMDGIRSVRCAQCPVLLRPRRYMQDPHFLEYQSHCEFMLNAWHSVVLQSARH
F32H2.3	F32H2.3.2	2013	2	2236	2542	no	1	57	2529	MVMTSHLSNFPMKKFFVLFQLDSPLSSPRTVICSLLLIVVSSSIFSLLQLNSVLLQAGRRKRYAATTTLLYSRQQLSVIRHLSTTLQLFPIQDFRIESKILT
Y6B3B.3	Y6B3B.3	2015	2	73	238	no	1	0	3321	MLLRMLVFLRLMLLDRTIPFLDLRELLMHLHQKMQPPIQQNGLQIESTTTCKRNS
T23H2.4	T23H2.4	2019	2	523	724	no	1	0	1401	MKLTWQHLQMLCGRDKIPSFLMKKIYEEEKFGEVQNYQMYVLQSLVIFVLQFVPGNQRIFNFFHLKL
Y92H12BR.3	Y92H12BR.3b	2021	3	260	428	yes	1	0	813	MDSGVDWCKADLVYQRYQNPLRPKPSRPKWPKRSRRLLNFQECPPNYPISSYRLLR
Y92H12BR.3	Y92H12BR.3a	2023	2	517	667	no	1	0	1911	MERRLTIRRCCWRFDTPEKRRSDRLNRHSPTRCSSRSGSPSFRTLTARWR
Y92H12BR.3	Y92H12BR.3a	2024	3	260	488	yes	1	0	1911	MDSGVDWCKADLVYQRYQRRMHRECLETGSIQNFTLRIHHRRRHIIPLQHHSRTNRIRQIAHRIFRRRSRRSGRWC
Y47H9C.10	Y47H9C.10	2027	2	436	565	no	1	0	1239	MFTCRCKTKKRFYFLKIMRSWKKRFHVMEMMEMRNIWKLHWKK
Y47H9C.10	Y47H9C.10	2028	2	733	1009	no	1	0	1239	MMRRQRSLTLSQEISRTLKLNISALDTSTQSIPGVLDMMMIQMTVLRIIWECTSSSPSSRTGRKRKKSKSEWMIRWIFQLKPFFTWKTLRFP
F46A9.3	F46A9.3b	2030	3	392	578	yes	1	90	1431	MVIQICSSLLSWNFDNFGVWKNRASNNQWTYFNSDLRIFWNPSNCHSLDKFWKIFRGNGNKV
F46A9.3	F46A9.3a	2032	3	389	575	yes	1	0	1428	MVIQICSSLLSWNFDNFGVWKNRASNNQWTYFNSDLRIFWNPSNCHSLDKFWKIFRGNGNKV
Y48G10A.4	Y48G10A.4b	2034	2	673	820	no	1	36	1680	MLNRCWRRVDNYQWNVSSRYRLLECSVPTSSTTRIRQHVKSVPMASGVQ
Y48G10A.4	Y48G10A.4b	2035	2	1588	1708	no	1	36	1680	MYLRYLQHKKSIEELPNSSLHSLPSILDYMFEFVFFLRNF
Y48G10A.4	Y48G10A.4a	2037	2	1924	2071	no	1	0	2931	MLNRCWRRVDNYQWNVSSRYRLLECSVPTSSTTRIRQHVKSVPMASGVQ
Y48G10A.4	Y48G10A.4a	2038	2	2839	2959	no	1	0	2931	MYLRYLQHKKSIEELPNSSLHSLPSILDYMFEFVFFLRNF
DY3.5	DY3.5	2041	2	76	322	no	1	0	1992	MELLKYNNSSINSNNNHNILRVMVNLHHPSQLRLHILNRKHNHTNLHNNHQHHHQIFNSIVITLSLVFNMVLKIHFIQIKLL
F25H5.5	F25H5.5a	2044	2	265	406	no	1	0	2256	MKMMTQVTNGSKRRLMLKKFRNWQKVRKKLNYSPFLEKYRRTHPRAF
D1007.13	D1007.13a	2046	2	109	289	no	1	0	426	MDPRSHPHIPHQLLLHQHTQLLHHGVQHIHQKIFQLFNKHSNNSNNHMEQFNLKFHLRKV
D1007.13	D1007.13a	2047	3	179	344	yes	1	0	426	MGFNTSTRRSSNCSTSIPTTATIIWNSSTSSFTCAKFNRKLKRIRWITGTFASTK
D1007.13	D1007.13a	2048	3	359	506	no	1	0	426	MVFRISRKTRSGYGKGKEKREDLRRLLIFRLFILMLFTQVLFQINNICI
D1007.13	D1007.13b	2050	2	247	604	yes	1	0	741	MVKKPKHLAQRSENQSGGEFNRQWQHKTQHLTSSLHNHHLQHPHHLPHIPHRLPRHPQHMDPRSHPHIPHQLLLHQHTQLLHHGVQHIHQKIFQLFNKHSNNSNNHMEQFNLKFHLRKV
D1007.13	D1007.13b	2051	3	674	821	no	1	0	741	MVFRISRKTRSGYGKGKEKREDLRRLLIFRLFILMLFTQVLFQINNICI
D1007.13	D1007.13b	2052	3	494	659	yes	1	0	741	MGFNTSTRRSSNCSTSIPTTATIIWNSSTSSFTCAKFNRKLKRIRWITGTFASTK
K10C3.4	K10C3.4a	2054	2	361	535	no	1	0	1110	MQLIWRCVTFTHDSMILWKVLLLNQLICVCWKHELYHWVLYAGHYTCRIHFWMQNIRN
K10C3.4	K10C3.4a	2055	2	1009	1219	no	1	0	1110	MRMIITEKELQRHVLRHRHLQLPHIPLTQSTQKHDAKSCDVQIMFATHSFSIPRFSVSVCVDDLGKKHAX
K10C3.4	K10C3.4a	2056	3	1046	1199	no	1	0	1110	MFFVIDIFSFLTFRSPNRPKSMTPKAVMFKSCSQLTASQFRDSQFLYVSMI
K10C3.4	K10C3.4b	2058	1	525	663	no	3	599	752	MTNGSLNTVEEINEDDHHGEGTSTSCSSSSTSSASSHSAHPIDPKA
K10C3.4	K10C3.4b	2059	2	88	448	no	3	599	752	MQKPLNEMNLHLVTIRTAAHLVSMAEKGAEDKLNIVDLKDHLMRMRRQIRGDMLLDDDYETEDDLDDVEEVDDEAHDPDGLVVKNKIGKDHEKIPLVESEAIIDMIELTRGSPSSSKNNS
K10C3.4	K10C3.4b	2060	2	562	766	no	3	599	752	MRMIITEKELQRHVLRHRHLQLPHIPLTQSTQKHDAKSCDVQIMFATHSFSIPRFSVSVCVDDLGKKX
C41G7.3	C41G7.3	2062	1	801	924	no	2	37	1216	MRCRKNQAMDSNHGSRKNIRKSCCSEKAYRETIQLRYYRSH
C41G7.3	C41G7.3	2063	1	255	375	no	2	37	1216	MAKERCSNYDTRGCPQCILYTHLSYSSTTGILCCCSLLLF
C41G7.3	C41G7.3	2064	3	302	434	no	2	37	1216	MHLVHTFVILFYHGHTVLLFSSSLLICNGDPAALILSLTSSLAR
C41G7.3	C41G7.3	2065	3	1001	1175	no	2	37	1216	MQLCPSCNHTRTNLLQILPILGSVRLDLHSLQIVLQQLPRSVVIRDNIIAAVSVISQR
F36A2.2	F36A2.2	2067	2	751	889	no	1	3	1584	MLLKLLDQEFQLWLMEIFSSPVTLNDVCRLLEPLQLCLQKDFFTIL
Y71G12B.9	Y71G12B.9b	2069	3	782	905	no	2	0	1720	MKILYIWRRIQLKRQAANVLAEPQVRGARLKNDQNDVFKRY
Y71G12B.9	Y71G12B.9b	2070	3	209	635	no	2	0	1720	MRMRMLLQMVLNLRKSWLQMLRLQELQKLQLQLKKPQKLQLRIKKLQKFRMFRILRELQMLQLRLQRLLMLQLQKFQDLQKLRMLRMFRILWELQMLQLKKFQKLQKPQKLQKSPLKSTKKCCSPSKMEFWTKDLMRLTILS
Y71G12B.9	Y71G12B.9a	2072	3	782	905	no	2	0	2185	MKILYIWRRIQLKRQAANVLAEPQVRGARLKNDQNDVFKRY
Y71G12B.9	Y71G12B.9a	2073	3	209	635	no	2	0	2185	MRMRMLLQMVLNLRKSWLQMLRLQELQKLQLQLKKPQKLQLRIKKLQKFRMFRILRELQMLQLRLQRLLMLQLQKFQDLQKLRMLRMFRILWELQMLQLKKFQKLQKPQKLQKSPLKSTKKCCSPSKMEFWTKDLMRLTILS
ZK39.3	ZK39.3	2075	2	61	259	no	1	15	654	MQCSSFLRRYPVTIRTEEAKQMVAVELDGVVSTAHLVVGVSEYSKEYLLKRTPKLNANPVVQHSPD
E01A2.2	E01A2.2a.1	2077	3	203	485	yes	2	0	2137	MVRIYPLNRIPYIRDHFKHSKSSSLARKMISRKKMLSKNIMSTRQNIENINLNGSSVPIKTKNGSVLNTNRMMRRSCERRIWKMCRSACRFSMS
E01A2.2	E01A2.2a.1	2078	3	1661	2153	yes	2	0	2137	MEKRKLKLLFKRILSSWQRINGSVRFLERNSRDLNSSESTCSLNMKTSWRKREQKLTFSTIILPTPKDQSTVSPNKLQEMIIVEVVVVSEVDMEENETMIEDLVVEEETLLAVEDMIVVPNSLLDIHLVDEVVVDATSRMRHVVSQSRIAIWMLQMIFHNSILR
E01A2.2	E01A2.2a.1	2079	3	14	143	no	2	0	2137	MMMAIAAVTNSPVNVVMRIIAVVEADSIAMTTSVLEDEEMITK
E01A2.2	E01A2.2b.1	2081	3	1268	1760	yes	2	157	1744	MEKRKLKLLFKRILSSWQRINGSVRFLERNSRDLNSSESTCSLNMKTSWRKREQKLTFSTIILPTPKDQSTVSPNKLQEMIIVEVVVVSEVDMEENETMIEDLVVEEETLLAVEDMIVVPNSLLDIHLVDEVVVDATSRMRHVVSQSRIAIWMLQMIFHNSILR
E01A2.2	E01A2.2a.2	2083	3	203	485	yes	2	0	2137	MVRIYPLNRIPYIRDHFKHSKSSSLARKMISRKKMLSKNIMSTRQNIENINLNGSSVPIKTKNGSVLNTNRMMRRSCERRIWKMCRSACRFSMS
E01A2.2	E01A2.2a.2	2084	3	1661	2153	yes	2	0	2137	MEKRKLKLLFKRILSSWQRINGSVRFLERNSRDLNSSESTCSLNMKTSWRKREQKLTFSTIILPTPKDQSTVSPNKLQEMIIVEVVVVSEVDMEENETMIEDLVVEEETLLAVEDMIVVPNSLLDIHLVDEVVVDATSRMRHVVSQSRIAIWMLQMIFHNSILR
E01A2.2	E01A2.2a.2	2085	3	14	143	no	2	0	2137	MMMAIAAVTNSPVNVVMRIIAVVEADSIAMTTSVLEDEEMITK
E01A2.2	E01A2.2b.2	2087	3	1268	1760	yes	2	157	1744	MEKRKLKLLFKRILSSWQRINGSVRFLERNSRDLNSSESTCSLNMKTSWRKREQKLTFSTIILPTPKDQSTVSPNKLQEMIIVEVVVVSEVDMEENETMIEDLVVEEETLLAVEDMIVVPNSLLDIHLVDEVVVDATSRMRHVVSQSRIAIWMLQMIFHNSILR
H05L14.2	H05L14.2	2090	2	724	955	no	1	0	6597	MHSPVNISNGWFQWLISQIIFRLMFVGSMHLWKQIIQAHQHSKKFFCVFSLFSKMVEFDENSFFFTKFLWSFKNWKH
H05L14.2	H05L14.2	2091	2	4945	5119	no	1	0	6597	MMITRNVFGIRLFTIDPNFKNSMKRTSHFFELKYEWVQFTFENLLMKMMTWFLVMEFP
H05L14.2	H05L14.2	2092	2	4636	4765	no	1	0	6597	MQSIYIIWQHWCLELDHSFHDSMEKSNNCIFLKLQENDGLVGR
H05L14.2	H05L14.2	2093	2	4243	4426	no	1	0	6597	MMNTLDLLLMIWNFEKSSKKHTVVRFRKITNKLSKKFAHFNLDIFMFLMHSLAVNSSSRTR
H05L14.2	H05L14.2	2094	2	3883	4063	no	1	0	6597	MILMMNHLFHLLQSVQNLFWILHNQKLNRMPSTVYWGFRSNAKKRISVFGRGLRMSVQSQ
H05L14.2	H05L14.2	2095	2	4462	4615	no	1	0	6597	MIVSINTIHHGLLSMVSRIFTSDSKKKFYQKFFHSYLADLYQFEHSSLSLK
H05L14.2	H05L14.2	2096	3	6587	6776	no	1	0	6597	MPGVIPNLPFVLLLNGGVNSVVLKFCFKWQRIDRNDEILLFSFLTSNFFLIFFPILQKQMISK
K11D2.3	K11D2.3a.1	2098	1	1590	1764	no	2	106	1372	MSNISNFFCENLMLRELLPGSKHVLCVLFPLMTPNSIFFCSKIFILFFPPIYLLIFIA
K11D2.3	K11D2.3a.1	2099	1	315	438	no	2	106	1372	MPFKRQRHNDFVIFVQMRRSFLRIFQRCRRGVGSRQFCRYL
K11D2.3	K11D2.3b	2101	1	579	753	no	2	187	361	MSNISNFFCENLMLRELLPGSKHVLCVLFPLMTPNSIFFCSKIFILFFPPIYLLIFIA
K11D2.3	K11D2.3c	2103	1	1551	1725	no	2	514	1333	MSNISNFFCENLMLRELLPGSKHVLCVLFPLMTPNSIFFCSKIFILFFPPIYLLIFIA
K11D2.3	K11D2.3c	2104	1	276	399	no	2	514	1333	MPFKRQRHNDFVIFVQMRRSFLRIFQRCRRGVGSRQFCRYL
K11D2.3	K11D2.3a.2	2106	1	1551	1725	no	2	67	1333	MSNISNFFCENLMLRELLPGSKHVLCVLFPLMTPNSIFFCSKIFILFFPPIYLLIFIA
K11D2.3	K11D2.3a.2	2107	1	276	399	no	2	67	1333	MPFKRQRHNDFVIFVQMRRSFLRIFQRCRRGVGSRQFCRYL
Y106G6G.1	Y106G6G.1	2109	3	581	758	no	2	10	1114	MIHSHQFSTFPFFSLESSFIRTHPNHTRQVFFVFANGFSLFLRWSNTRRIQKRMIQLSP
ZC328.4	ZC328.4	2111	3	896	1223	no	2	16	1186	MSFMLTSKDMPSRKQLIRVSRDHLLLKLQLLLFIQFPVQSSKFGLLKDLDRQKQRLEWLLSVFSRICRLRNMPRLFCRITLRWCVQLQKSWISMRHCKFQIIYFHGKST
ZC328.4	ZC328.4	2112	3	344	464	yes	2	16	1186	MDSWRNTKRTRECLKFGRKWQIIALVMHMIFISLLLAENL
Y54E5B.3	Y54E5B.3b	2114	3	416	554	no	2	43	796	MNSGQFRLATVFEFYKRDKSKNYRIFARILKNICVMVEKLSMTNSK
Y54E5B.3	Y54E5B.3a	2116	1	396	534	no	3	17	776	MNSGQFRLATVFEFYKRDKSKNYRIFARILKNICVMVEKLSMTNSK
F17B5.2	F17B5.2	2118	1	1836	1989	no	3	71	2066	MTLLIMKQLGLVTHNSLKIVRENVRSSIISQNSTIIPLEHSGFLTTKASRT
F17B5.2	F17B5.2	2119	1	1344	1629	no	3	71	2066	MQERKTQRGGAGIRAFKTPASIKWSYLAIAGRIIMPRCSIKNATPRQRVSCKDVHLDVNLFIHLRLAKTVSQPLRFLSSKSRMSSRTMRFCSRDL
ZK524.4	ZK524.4	2121	2	3349	3487	no	1	3	3051	MFSKPLQHSSYSVFLSVFSLSLNLVTIFLRRALFPHTVVRGFFSKF
ZK524.4	ZK524.4	2122	2	985	1147	no	1	3	3051	MSTIQSQRHIICLPNEFSLRIGKNKHESFLQNMSNGMIVLIQYLIILEQLQGAI
ZK524.4	ZK524.4	2123	2	1591	1765	no	1	3	3051	MSMRFENPVIVVCMPIISCCVRHPPKDFSEETHHPPSQCSLESQEIVSVRKLCRNFLI
ZK524.4	ZK524.4	2124	3	833	986	yes	1	3	3051	MGSSWRSRFINGDPFNSSTPSSNLRPRNNNRTNGCWSNSIRRRYSSILRER
ZK524.4	ZK524.4	2125	3	2729	2861	yes	1	3	3051	MDRNGFMVRYTTKRLRRSNSLTREDPMASMPSSNCIKSRFIKRK
T09E11.7	T09E11.7	2128	2	484	610	no	1	0	1989	MCYQETNNWDITTLYACHPSFTILCLLQMFHSTVCLQEVGSF
T09E11.7	T09E11.7	2129	2	1720	1915	yes	1	0	1989	MGEMWMRFIKILSNSIHINWLVNGLKPSSRNAAISVSSSTMSHCYSTKPPIVSNFSILGGSFTLQ
T09E11.7	T09E11.7	2130	3	527	665	no	1	0	1989	MLVIPHLLSCVSSRCFIQQCVCKKLAVFNRHGSSPEATPGKQYSNK
F25H5.10	F25H5.10	2132	2	34	187	no	1	0	183	MQHNSKTETLLIGERPKFPIEKSFLTVCSRIVRRRTMKRSRRKNWRRKESX
F31C3.1	F31C3.1.2	2134	2	406	631	no	1	9	621	MDPNSSSPQSRPHGSMDATSFSERSSKEWMWSARSNRPRSFLGTARSKTSSSPLLDTSPSTLHSLLNARPSSKLK
F31C3.1	F31C3.1.2	2135	2	70	265	no	1	9	621	MPKDQRSLTRSTLTWKLEENQSDVSSSDFSEKPSQRPPPTSLSSPRSQREKDIQEASSTESSQTS
F31C3.1	F31C3.1.2	2136	3	443	602	no	1	9	621	MARWTPRRFRKDPRRNGCGPQDRTDREASWGPPEARRHHRRFWTHRRRHSILC
F31C3.1	F31C3.1.1	2138	1	399	624	no	3	0	614	MDPNSSSPQSRPHGSMDATSFSERSSKEWMWSARSNRPRSFLGTARSKTSSSPLLDTSPSTLHSLLNARPSSKLK
F31C3.1	F31C3.1.1	2139	1	63	258	no	3	0	614	MPKDQRSLTRSTLTWKLEENQSDVSSSDFSEKPSQRPPPTSLSSPRSQREKDIQEASSTESSQTS
F31C3.1	F31C3.1.1	2140	2	436	595	no	3	0	614	MARWTPRRFRKDPRRNGCGPQDRTDREASWGPPEARRHHRRFWTHRRRHSILC
Y18D10A.12	Y18D10A.12	2142	2	55	301	no	1	0	684	MAAGVVEVISHTPRFPHHRPPRKITITEDHHIPHAHLVHNQCSLAQNVKVAGHHTIGRRGHRASRSSTPQHLKVQLNRSADR
Y65B4BR.1	Y65B4BR.1	2144	2	742	982	no	1	27	1158	MCSSAHARRTRTSRIPTSRLPAIFTWMLSRRFKTRESSTQQMTLHLSFNHSSMESQFHHSSPTEKSIWIGLHRIASISQN
Y65B4BR.1	Y65B4BR.1	2145	3	104	299	no	1	27	1158	MAVRCIALSEEQKYPDFCPLRPIHRHKSFGSSRRLLDRRQWSRSTKGRPSGCDPSVQRTSLPVWR
ZK858.3	ZK858.3	2147	2	409	826	no	1	42	717	MLFAITLKSQSCHGSVSLDSHITKDWSSCQDGKLLDPLIHLRSTGSSNRSNQSSMDGHRMPTVLQASSLQPKSNLLRTPSSIRALWRSNQSANAIQPFSTLEINLKYVRNCSHISYIKNYFVLLILKISSHNINDYHCR
ZK858.3	ZK858.3	2148	3	575	710	no	1	42	717	MVIVCQLCCKLPVSNRSRICFVHLLLSVHYGVQINLRTQFNHSQR
F27C1.3	F27C1.3	2152	3	665	854	yes	2	7	793	MVHQLHQKLLLNMVLRLQLMTRTTKPWLVSIKMFSVQIRRKLIENLNPSNELVVYVSLTLINS
F27C1.3	F27C1.3	2153	3	140	365	no	2	7	793	MKQEQLEELLEVMMMTMMRMMKSVVKRRKTMRLRQKRKKQQPRKRERFLPELQSLRKIVLQLLTPMIPTTRHWPD
W02A11.1	W02A11.1	2155	2	808	934	no	1	30	966	MLIRRNGREMSMEQSLSKAAPPFHVSQLQSSIHILSQHTLGT
W02A11.1	W02A11.1	2156	2	526	649	no	1	30	966	MSAPLDSTWKTLPTGYSWMYRHRGRQSHSPQNQFSGLVEVV
W02A11.1	W02A11.1	2157	2	163	334	yes	1	30	966	MEHYVTNLLLEKDGVNVSRLQPATSTFFVQLLIFGLAPCHVEHRSSTLLIVLRFCRF
F21F3.5	F21F3.5	2161	1	699	942	yes	3	77	1610	MELIYPIIIHLSNGILCQELPKEEQRTIQVVVHRVLILMLLITSNSAVNRSSTQSIWSSHVSGSHFSQFLYSIFHRILERK
F21F3.5	F21F3.5	2162	2	877	997	no	3	77	1610	MCRDLISHNSCILSSIGFWRESDTLYINSCRLDYLLLAAH
T09B4.3	T09B4.3a	2164	2	52	202	no	3	194	569	MFIFRRDEIKTEQHEKKTIKKRQAIIIMIHFKFIVHLNFSKVKKQAYDAG
T09B4.3	T09B4.3b	2166	1	537	663	no	3	194	743	MSIIQSLKQKVQCRIESSTKLAPLILRRSPHLNRFSQQSKAF
T09B4.3	T09B4.3b	2167	2	52	202	no	3	194	743	MFIFRRDEIKTEQHEKKTIKKRQAIIIMIHFKFIVHLNFSKVKKQAYDAG
C01G8.5	C01G8.5a.2	2169	3	422	587	yes	2	97	1786	MEFCQMRFIVHRKPLFFLPLTRCKLNMETMFQRHMSPDVLLLIVCFLNAFSDNSN
C01G8.5	C01G8.5a.2	2170	3	893	1013	no	2	97	1786	MTLSSTLHDSVSTNVFLLCVWEITSFTCVEESQIPLKFNK
C01G8.5	C01G8.5a.2	2171	3	116	275	no	2	97	1786	MCVSPRWTRSSSSLFSRAPQESNFLIRLSKPLVSARSGILDFSTLTTRDSQHG
C01G8.5	C01G8.5a.2	2172	3	1475	1628	no	2	97	1786	MDTLTMRLPLMMKIMEQLNSQMTLIRMCHNTSWSVSQQPRRTFRSRISWIC
C01G8.5	C01G8.5a.2	2173	3	1859	2078	no	2	97	1786	MLIILALFSLSRFFYRTTIIIIINLKIYWFVPIHFLVHPISAFYNIIRNLFSSKKCSVSLFPSSCIRHIQFFK
C01G8.5	C01G8.5a.1	2175	2	1474	1627	no	1	96	1785	MDTLTMRLPLMMKIMEQLNSQMTLIRMCHNTSWSVSQQPRRTFRSRISWIC
C01G8.5	C01G8.5a.1	2176	2	421	586	yes	1	96	1785	MEFCQMRFIVHRKPLFFLPLTRCKLNMETMFQRHMSPDVLLLIVCFLNAFSDNSN
C01G8.5	C01G8.5a.1	2177	2	892	1012	no	1	96	1785	MTLSSTLHDSVSTNVFLLCVWEITSFTCVEESQIPLKFNK
C01G8.5	C01G8.5a.1	2178	2	1858	2077	no	1	96	1785	MLIILALFSLSRFFYRTTIIIIINLKIYWFVPIHFLVHPISAFYNIIRNLFSSKKCSVSLFPSSCIRHIQFFK
C01G8.5	C01G8.5a.1	2179	2	115	274	no	1	96	1785	MCVSPRWTRSSSSLFSRAPQESNFLIRLSKPLVSARSGILDFSTLTTRDSQHG
C01G8.5	C01G8.5b	2181	1	1824	2043	no	3	59	1751	MLIILALFSLSRFFYRTTIIIIINLKIYWFVPIHFLVHPISAFYNIIRNLFSSKKCSVSLFPSSCIRHIQFFK
C01G8.5	C01G8.5b	2182	1	858	978	no	3	59	1751	MTLSSTLHDSVSTNVFLLCVWEITSFTCVEESQIPLKFNK
C01G8.5	C01G8.5b	2183	1	387	552	yes	3	59	1751	MEFCQMRFIVHRKPLFFLPLTRCKLNMETMFQRHMSPDVLLLIVCFLNAFSDNSN
C01G8.5	C01G8.5b	2184	1	81	240	no	3	59	1751	MCVSPRWTRSSSSLFSRAPQESNFLIRLSKPLVSARSGILDFSTLTTRDSQHG
C01G8.5	C01G8.5b	2185	1	1440	1593	no	3	59	1751	MDTLTMRLPLMMKIMEQLNSQMTLIRMCHNTSWSVSQQPRRTFRSRISWIC
C06A5.3	C06A5.3a	2187	1	1824	2139	no	3	8	2348	MLHELLKWRLMLLQHRLFHNKEESIRKGRRMVWVQELEEKIEIIVHLRMMLRKDRHLLSMIVPHHIDRVQWRNVQDGGLERKGESMHHQNENSEQLPLILQLHFE
C06A5.3	C06A5.3b	2189	1	1833	2148	no	3	8	2357	MLHELLKWRLMLLQHRLFHNKEESIRKGRRMVWVQELEEKIEIIVHLRMMLRKDRHLLSMIVPHHIDRVQWRNVQDGGLERKGESMHHQNENSEQLPLILQLHFE
Y54E10A.11	Y54E10A.11	2191	2	1660	1798	no	1	147	4485	MSIFILSGIWRVLRILSILRKLAEISIISSLSKIPIDLICFKLWKL
Y54E10A.11	Y54E10A.11	2192	2	2194	2338	no	1	147	4485	MEISSSSSRNYLRIWRKRMLKEFWKLQLDLISLLDFVMQIREGKSLGK
Y54E10A.11	Y54E10A.11	2193	2	3139	3298	no	1	147	4485	MRQSVEHIRSKVLKNGMNSTHQQFIPIVFDYSVQFDEINSRLRSFGLFSEHFL
Y54E10A.11	Y54E10A.11	2194	2	592	784	no	1	147	4485	MLRMESLRLLLQLFEMDLMRIRSDKLWSSLCRIPLIWQRKLRRESMNSRCQRNMMLRRIWKRGK
Y54E10A.11	Y54E10A.11	2195	2	3328	3454	no	1	147	4485	MMMTWRIKSLFRNCRFSSIPHSKNHVLHRLLVYLHPTMSIFN
H06O01.1	H06O01.1.1	2197	2	94	829	no	1	3	1467	MISSKPTTLLLSSSTLPGADTARKLPQSMRELPQNSHLTIHQSLSSRSIVPPRRLFVTNSELRDSQLLRSSAMEFQPKTTMDHVMPMVSLSSCADSRDLLPRNLRPLPNSRSSLVEMKMLSSDSSRAKASLRILISRLLIPNVIVSPSLTLPTKTSSRRLDTLMTSLSSFQKSSITSLTLTSSNMMVTTTPIRLRTSWSMKLLDLPEFVLKETCSNSSKSQSSLFTTTLITSRILRDPTTGATVS
H06O01.1	H06O01.1.1	2198	2	1078	1585	no	1	3	1467	MNKETLRLPLERTSRNLSWMLIRMCSLNFMLHGADIANHWLQNTRNLLRSSTRKMLSLLRWMPPPMMFHQCSKLEDSQLSSGFQRTLSRTRSHTMEDAKLRISSASSQSTLLMGSRVSAATERRRRRLNCNWIIIENFYQIPPSLFPFCNLFIYCLQLRLGFPIEEFST
H06O01.1	H06O01.1.4	2200	3	101	836	no	2	10	1474	MISSKPTTLLLSSSTLPGADTARKLPQSMRELPQNSHLTIHQSLSSRSIVPPRRLFVTNSELRDSQLLRSSAMEFQPKTTMDHVMPMVSLSSCADSRDLLPRNLRPLPNSRSSLVEMKMLSSDSSRAKASLRILISRLLIPNVIVSPSLTLPTKTSSRRLDTLMTSLSSFQKSSITSLTLTSSNMMVTTTPIRLRTSWSMKLLDLPEFVLKETCSNSSKSQSSLFTTTLITSRILRDPTTGATVS
H06O01.1	H06O01.1.4	2201	3	1085	1592	no	2	10	1474	MNKETLRLPLERTSRNLSWMLIRMCSLNFMLHGADIANHWLQNTRNLLRSSTRKMLSLLRWMPPPMMFHQCSKLEDSQLSSGFQRTLSRTRSHTMEDAKLRISSASSQSTLLMGSRVSAATERRRRRLNCNWIIIENFYQIPPSLFPFCNLFIYCLQLRLGFPIEEFST
H06O01.1	H06O01.1.3	2203	1	126	861	no	3	35	1499	MISSKPTTLLLSSSTLPGADTARKLPQSMRELPQNSHLTIHQSLSSRSIVPPRRLFVTNSELRDSQLLRSSAMEFQPKTTMDHVMPMVSLSSCADSRDLLPRNLRPLPNSRSSLVEMKMLSSDSSRAKASLRILISRLLIPNVIVSPSLTLPTKTSSRRLDTLMTSLSSFQKSSITSLTLTSSNMMVTTTPIRLRTSWSMKLLDLPEFVLKETCSNSSKSQSSLFTTTLITSRILRDPTTGATVS
H06O01.1	H06O01.1.3	2204	1	1110	1617	no	3	35	1499	MNKETLRLPLERTSRNLSWMLIRMCSLNFMLHGADIANHWLQNTRNLLRSSTRKMLSLLRWMPPPMMFHQCSKLEDSQLSSGFQRTLSRTRSHTMEDAKLRISSASSQSTLLMGSRVSAATERRRRRLNCNWIIIENFYQIPPSLFPFCNLFIYCLQLRLGFPIEEFST
H06O01.1	H06O01.1.2	2206	3	1088	1595	no	2	13	1477	MNKETLRLPLERTSRNLSWMLIRMCSLNFMLHGADIANHWLQNTRNLLRSSTRKMLSLLRWMPPPMMFHQCSKLEDSQLSSGFQRTLSRTRSHTMEDAKLRISSASSQSTLLMGSRVSAATERRRRRLNCNWIIIENFYQIPPSLFPFCNLFIYCLQLRLGFPIEEFST
H06O01.1	H06O01.1.2	2207	3	104	839	no	2	13	1477	MISSKPTTLLLSSSTLPGADTARKLPQSMRELPQNSHLTIHQSLSSRSIVPPRRLFVTNSELRDSQLLRSSAMEFQPKTTMDHVMPMVSLSSCADSRDLLPRNLRPLPNSRSSLVEMKMLSSDSSRAKASLRILISRLLIPNVIVSPSLTLPTKTSSRRLDTLMTSLSSFQKSSITSLTLTSSNMMVTTTPIRLRTSWSMKLLDLPEFVLKETCSNSSKSQSSLFTTTLITSRILRDPTTGATVS
W03D8.8	W03D8.8	2212	2	262	382	no	1	0	1290	MVDIFGVLRQFRFIICWNSLIHPEPLSTLPTSKSTGCTQN
W03D8.8	W03D8.8	2213	2	1057	1252	no	1	0	1290	MEDTLWSHHTSHITNSSTQNTRDSIVDMVEKWFYTQNHRRRHGPILSNSSKKLLEIQRKFRIGID
W03D8.8	W03D8.8	2214	2	709	883	yes	1	0	1290	MAIRSRPWSPSMAPKSYLTTSSCKKTVPQFLISPMAKSLWSTVNSLMESCVPIETSRL
R05D11.1	R05D11.1	2216	2	859	994	no	1	18	1656	MIPKLVTSCIPRIFHQRTMETESQRMQMDGLSHQLNLDHSIDLRH
R05D11.1	R05D11.1	2217	2	1141	1276	no	1	18	1656	MDLQLVALTQKPEAVSRLVGTTIQTALHKRPKFVVSLERVFDFTC
C55B7.8	C55B7.8.2	2219	2	1222	1348	no	1	3	1503	MCHQAPTTVIHNLPSFVSGLVFGILIRCSLKKHLNTLELRTT
C55B7.8	C55B7.8.2	2220	2	376	604	no	1	3	1503	MKHLVIYVNCLMEDGWRRIFITWDSQIAFDLLTFVSQDSLEFSRKEIFNFRITNALRFRKEMLKAHITFETLICSG
C55B7.8	C55B7.8.2	2221	2	790	949	no	1	3	1503	MIAGPDTILLHIFILLLRPLFLIKVQDQAVHSLHDSYHWINRFLGESLCRLSS
C55B7.8	C55B7.8.2	2222	3	995	1166	yes	1	3	1503	MVGYSEKYRFINNWNKRTADTSRYGIKSSMCLRKKRFSTNSRGVKRNRKTRRFNNQN
C55B7.8	C55B7.8.1	2224	1	993	1164	yes	2	0	1501	MVGYSEKYRFINNWNKRTADTSRYGIKSSMCLRKKRFSTNSRGVKRNRKTRRFNNQN
C55B7.8	C55B7.8.1	2225	3	1220	1346	no	2	0	1501	MCHQAPTTVIHNLPSFVSGLVFGILIRCSLKKHLNTLELRTT
C55B7.8	C55B7.8.1	2226	3	788	947	no	2	0	1501	MIAGPDTILLHIFILLLRPLFLIKVQDQAVHSLHDSYHWINRFLGESLCRLSS
C55B7.8	C55B7.8.1	2227	3	374	602	no	2	0	1501	MKHLVIYVNCLMEDGWRRIFITWDSQIAFDLLTFVSQDSLEFSRKEIFNFRITNALRFRKEMLKAHITFETLICSG
F43G9.5	F43G9.5	2229	3	677	845	no	2	7	688	MTPTKYFYYLLLFVSSYFVNDLVHSNFAPTKSSILLCMISQIVSMNLKINYFFIFX
F17B5.5	F17B5.5	2232	2	412	571	no	1	0	732	MYQHADTKAVDLITHLHGPMVTRMELQASANGELDNPIIVTMEDLQSVFNNSS
F17B5.5	F17B5.5	2233	2	67	223	no	1	0	732	MVVKEVEEDGLISLILLYLHLPKNIDIDPRIGRGLQDPQDQQLREVNVTMDG
C15A11.3	C15A11.3	2235	1	249	468	no	3	35	1817	MYSSYRHELEFVHLQLCFSTIQPMDLSSLENELTLSFVEKKSLRDVNSFQRTSTFYCKFRVEKSHRVDFGDRF
C15A11.3	C15A11.3	2236	1	1650	1776	no	3	35	1817	MTSLMQPDFMHIISLSLKRNLKSVGSSSRYLLAKLRSPHFSL
C15A11.3	C15A11.3	2237	1	1371	1635	no	3	35	1817	MGNFGLQTIQDCIREIYIVNIYSMEEMIKLFIFILNISTLKVLTNATKQLKVIIFYFQTIRLMIERIVVFVGKQLQKVQYYQNPITFE
C15A11.3	C15A11.3	2238	1	1050	1176	no	3	35	1817	MFRITRTLPNVAQKWIICLLMFEWGHVFQELMNGVVNELHPI
Y37F4.7	Y37F4.7	2240	1	468	606	no	3	245	524	MPHWIWLTCVSHRRIGKFFKFCFLFVLFDLQVLVLVSVDFFLIFNF
D2030.1	D2030.1.1	2242	2	1009	1150	no	1	75	1695	MNICSNNGLPLVKKMIARKENTKKRYLQWKNECFSNRNSRIFGISQK
D2030.1	D2030.1.1	2243	2	1480	1615	no	1	75	1695	MFKIWRSIVRALPDTLESETSTNRARNKMMCSSHSSSLSSSNICI
D2030.1	D2030.1.1	2244	2	217	352	no	1	75	1695	MCLSERKFVVKSKMSYGGKPKKPIPFQFQNLKLEHQMMQKDEEFS
D2030.1	D2030.1.1	2245	3	1652	1853	no	1	75	1695	MGFQYRSSSIPHSALIMFPSSLNFFSFQCKYGYKNVYLYFLSCFSLIYCFYLLFSIILSYGKSLPLR
D2030.1	D2030.1.2	2247	1	1743	1944	no	2	166	1786	MGFQYRSSSIPHSALIMFPSSLNFFSFQCKYGYKNVYLYFLSCFSLIYCFYLLFSIILSYGKSLPLR
D2030.1	D2030.1.2	2248	3	308	443	no	2	166	1786	MCLSERKFVVKSKMSYGGKPKKPIPFQFQNLKLEHQMMQKDEEFS
D2030.1	D2030.1.2	2249	3	1571	1706	no	2	166	1786	MFKIWRSIVRALPDTLESETSTNRARNKMMCSSHSSSLSSSNICI
D2030.1	D2030.1.2	2250	3	1100	1241	no	2	166	1786	MNICSNNGLPLVKKMIARKENTKKRYLQWKNECFSNRNSRIFGISQK
K05C4.2	K05C4.2.2	2254	1	213	726	no	2	22	589	MEKRVLRSTGHAVSLPMGVCVVLLIHSDRPRHLFVPTKQTQDPPLRLLCRVRRRNLPMHDRAWRTTSRADGVCSRHGGKQHTDIQRNLPDGHHMVHLLRGRTPDSRILHVLHASPCRRMGSSQARLNFLRFVILFFNFPPFVELCTFSLLIVFLFKFLLVSIAKLIIPYLL
K05C4.2	K05C4.2.2	2255	3	269	389	no	2	22	589	MCGASHSFRSSSPSIRSNETNSRSSTTPTMPSSSSESSHA
K05C4.2	K05C4.2.2	2256	3	428	638	no	2	22	589	MLKTWREATHRHSKESSRWSSYGTSSSRSHSRFTDSPCTSCITLPPHGLQSSEIKFSPFCDIIFQFSPIC
K05C4.2	K05C4.2.3	2258	1	207	720	no	2	16	583	MEKRVLRSTGHAVSLPMGVCVVLLIHSDRPRHLFVPTKQTQDPPLRLLCRVRRRNLPMHDRAWRTTSRADGVCSRHGGKQHTDIQRNLPDGHHMVHLLRGRTPDSRILHVLHASPCRRMGSSQARLNFLRFVILFFNFPPFVELCTFSLLIVFLFKFLLVSIAKLIIPYLL
K05C4.2	K05C4.2.3	2259	3	263	383	no	2	16	583	MCGASHSFRSSSPSIRSNETNSRSSTTPTMPSSSSESSHA
K05C4.2	K05C4.2.3	2260	3	422	632	no	2	16	583	MLKTWREATHRHSKESSRWSSYGTSSSRSHSRFTDSPCTSCITLPPHGLQSSEIKFSPFCDIIFQFSPIC
K05C4.2	K05C4.2.1	2262	1	318	438	no	3	71	638	MCGASHSFRSSSPSIRSNETNSRSSTTPTMPSSSSESSHA
K05C4.2	K05C4.2.1	2263	1	477	687	no	3	71	638	MLKTWREATHRHSKESSRWSSYGTSSSRSHSRFTDSPCTSCITLPPHGLQSSEIKFSPFCDIIFQFSPIC
K05C4.2	K05C4.2.1	2264	2	262	775	no	3	71	638	MEKRVLRSTGHAVSLPMGVCVVLLIHSDRPRHLFVPTKQTQDPPLRLLCRVRRRNLPMHDRAWRTTSRADGVCSRHGGKQHTDIQRNLPDGHHMVHLLRGRTPDSRILHVLHASPCRRMGSSQARLNFLRFVILFFNFPPFVELCTFSLLIVFLFKFLLVSIAKLIIPYLL
Y92H12A.4	Y92H12A.4	2266	2	2161	2350	no	1	0	2346	MRCLHQIFNYVQLMIIDYSPILFRSYSHSLKRKSCRRRHFWRHFARILMRFNLDRLSAKLFGX
Y92H12A.4	Y92H12A.4	2267	2	1891	2011	no	1	0	2346	MSNHYYRQMKKISLRHSHIRYTRFSKCYALHLTTMKLQVT
F09C3.3	F09C3.3	2269	2	433	649	no	1	0	981	MFLVLKICRIYNQSMRYSKDFRLDYSAHRLQKWIIMNACSMIEFFNFFRTTRNGFLSNTVKDLSADMRYTIY
K06A5.3	K06A5.3	2273	2	289	448	no	1	0	435	MSECLHGDAGREQRSRLYRRNAYQFQSKDQVNVRKRKRNMRKRRLKARIDNYF
C48E7.1	C48E7.1	2276	1	114	285	no	3	14	536	MDKFARALQDISLQPTMTQRRVAMMNVKRCISPFSPPESVWTTSLAKCQRINNLHVI
C48E7.1	C48E7.1	2277	1	408	735	no	3	14	536	MPKRPTKTLNELLLKLKLPHQKINKLPQWDTIHTPIGHITDVLKTLISFLFFFSKSIQKSSHTHSPKSGFSMHFNVIFYNFIIQVFRRTTCSTNFDRPIQKLPFSSNST
C48E7.1	C48E7.1	2278	2	289	433	no	3	14	536	MWNQNSSLGNHCCIRRYCCCSRIPCSCSSNVYRILLSLFECQKGQQKR
ZK39.2	ZK39.2	2280	1	276	396	no	2	10	697	MPILRSYPFRTSESRGSAHYFQSGPQCDWPFKRRNMARST
ZK39.2	ZK39.2	2281	3	92	251	yes	2	10	697	MATVMVMVTVMEMVMAMAMVMATEGGQTVAVKLAGVISDVHLVVGVSEFLAED
ZK39.2	ZK39.2	2282	3	611	734	no	2	10	697	MTSLVPLIQQEEIQDLFMDTFVERSQVEDDILLIQRIKVIT
W05H12.4	W05H12.4	2285	2	43	223	yes	3	86	377	MENDCIHASIVDLVDAKYFPDPIAEGFLLIEDNTGSGLDRVEEESPFQRRQMFLFAQAEQ
D1037.3	D1037.3	2287	2	118	322	no	1	45	555	MPHTSTFQCHSISIVTMLPFQTLPSSSRNNRMRSVSMLPSSCVCRIFVEDVSCFRTSRSQRMMSGEPP
F26H9.2	F26H9.2	2289	3	113	236	no	2	49	1573	MPRHQQVAEVNQKRVDRHENQYHLLHRNSGSDWLDHGNGEI
F26H9.2	F26H9.2	2290	3	1508	1682	no	2	49	1573	MILKLLKWMFMRKAACSQDSTGDTRLKLVNLHAQILHFIRDTYFLSFSFPILLSSIFP
C10G11.8	C10G11.8	2292	1	435	555	no	2	70	1384	MVRTNSLDRRQGLASSECPRHGEGWWNVQNSSKCNRWSFG
C10G11.8	C10G11.8	2293	3	1034	1178	no	2	70	1384	MSKLSWQRTESTRWIPLLSVLDELIERLSYQNQMRRLDKRFSRSTPLE
C10G11.8	C10G11.8	2294	3	1202	1421	no	2	70	1384	MRMYWERRRALVELKSRRFARKLVCWLFVLNENVSERMTLRRLSNRLCCRRRAEHQKDSSLDNRKFNKVQTSX
C10G11.8	C10G11.8	2295	3	695	1001	no	2	70	1384	MKKWESLLRKELFFTVNLELERRFWRKQLQTQHLQHSSVQLDPILFRNKVGKVLVLFVKSSKWQRNRLHRLYSLMKLMQLVRKDLILLHVENKKFNELFLSS
F36F2.1	F36F2.1b.1	2298	2	430	634	no	1	81	516	MIMLLSHFYSLEHSLKRLFEHTQQQTQRNKYSDSMENCKFIVLNDFFILLLGLSNTGFLIDKRIVEKY
F36F2.1	F36F2.1b.1	2299	2	112	244	no	1	81	516	MMCIPKILLKRKWTSPVANMDGQNQELLQSKELKKLPPTFTEKC
F36F2.1	F36F2.1b.2	2301	3	311	443	no	2	280	715	MMCIPKILLKRKWTSPVANMDGQNQELLQSKELKKLPPTFTEKC
F36F2.1	F36F2.1b.2	2302	3	629	833	no	2	280	715	MIMLLSHFYSLEHSLKRLFEHTQQQTQRNKYSDSMENCKFIVLNDFFILLLGLSNTGFLIDKRIVEKY
F36F2.1	F36F2.1a	2304	2	91	223	no	1	9	495	MMCIPKILLKRKWTSPVANMDGQNQELLQSKELKKLPPTFTEKC
F36F2.1	F36F2.1a	2305	2	409	613	no	1	9	495	MIMLLSHFYSLEHSLKRLFEHTQQQTQRNKYSDSMENCKFIVLNDFFILLLGLSNTGFLIDKRIVEKY
Y105E8A.7	Y105E8A.7e	2309	2	1267	1606	no	3	50	1157	MKAVMSSTDDSTFDVTLCERIPPNSPLLGPYISEGPRMVMQFGSTETRDDNISPIGFKATIEFKTDFGVTGESLGTSNECKFRFTSSTGFFNSPRYPANYPLDTNCTYYIVGX
Y105E8A.7	Y105E8A.7e	2310	3	1412	1604	no	3	50	1157	MIISRRLGSRRLSSLRRTLVLLESRWELPMSASSDLPRLLGFSTVPGILLITPSTQTAPTTSLV
Y105E8A.7	Y105E8A.7b	2312	1	1845	2067	no	3	50	2570	MGSRRCSRYGLRGRRMYRGEKPISDVEPTAAVQLSIRLLRSPMALSSPRITLLNTTRMFIVTGRLMLRKDTRFS
Y105E8A.7	Y105E8A.7b	2313	1	1422	1713	no	3	50	2570	MIISRRLGSRRLSSLRRTLVLLESRWELPMSASSDLPRLLGFSTVPGILLITPSTQTAPTTSLVSLERKFYCTLSNSRSAGTPTTIVMTIWMCMMYL
Y105E8A.7	Y105E8A.7b	2314	1	2391	2517	yes	3	50	2570	MGLIIVDMEFRMILMNSIVKTTLHGRSTRRSSWQHPLLLQLL
Y105E8A.7	Y105E8A.7b	2315	2	2752	2887	no	3	50	2570	MHKQHCDSSELSPPATSRFVHHDATGMMPPIQLHQIGSSSRDMYA
Y105E8A.7	Y105E8A.7a	2317	1	1845	2067	no	3	50	2768	MGSRRCSRYGLRGRRMYRGEKPISDVEPTAAVQLSIRLLRSPMALSSPRITLLNTTRMFIVTGRLMLRKDTRFS
Y105E8A.7	Y105E8A.7a	2318	1	1422	1713	no	3	50	2768	MIISRRLGSRRLSSLRRTLVLLESRWELPMSASSDLPRLLGFSTVPGILLITPSTQTAPTTSLVSLERKFYCTLSNSRSAGTPTTIVMTIWMCMMYL
Y105E8A.7	Y105E8A.7d	2320	3	410	632	no	1	0	234	MKLVLHSRSTNHEDNHGFRAKYSFIPEDKFIAGEPVGGKKCSFIIDSSDRKIGTLYSPTYPGTYPHNMHCSYLM
K08C9.5	K08C9.5	2322	2	166	355	no	1	0	933	MENSKFGCNSADLSLFGHLSMMLKYYLKMAELFELQNGPAGGAKCWRSPMKESLDFDKLLIDF
F57B10.4	F57B10.4	2325	2	1114	1324	no	1	0	2073	MWNQRKKRLFGVSWHLALNFPDQSHSSVTMFEMWRNHCVLRSGTKEPRRSRRSLQIQHDLLDRLVCIIQG
F57B10.4	F57B10.4	2326	2	1543	1816	no	1	0	2073	MIQCRPRKTWINCLIMFAEKAKWNTFPIITAVPLKLTARRVFHLNATIRLQVYRQHRKSRSYLEPLRMNLCSMISSIQQAPTKNLTTLSFP
F57B10.4	F57B10.4	2327	2	1825	1954	no	1	0	2073	MWQNSITDKKQKELQSKLRRVLQKYLAKKRNQLQMIKALATAT
F57B10.4	F57B10.4	2328	2	352	514	no	1	0	2073	MKRVLKNLQKNTKLWFFPLMKFRVLFSTWKMKKSMWKSVNLQQANLYFKLKKKL
F57B10.4	F57B10.4	2329	2	742	883	no	1	0	2073	MSCALTSVILTKLILHLSKSFLIAMRYASSPMNCKLLKSLKLKTQKV
F57B10.4	F57B10.4	2330	2	28	205	no	1	0	2073	MKRKSSRSSETITYSKKSFRAFKDSVETYQETMHSSIRVVHKSNIRQQPQKKCQSAIKM
Y71A12B.8	Y71A12B.8	2332	2	349	529	no	1	0	1455	MLTRKLSLKCTWRKWHIISGKWTKLKFRFIVFSTTIRMFSKRYISRMLMRCFERFRQSAP
Y71A12B.8	Y71A12B.8	2333	2	7	151	no	1	0	1455	MHSGYSQLKKIILQNWHSNLGHQIGRGGKLHCANPIRYDSLLETEAAI
Y71A12B.8	Y71A12B.8	2334	2	1192	1396	no	1	0	1455	MCSTRQLLCMSSSTLGKTLNDSSTVFRGLKFVRHRTKMEHQIRKVRLLLAKLQHLVINVNLNHSTSTR
B0205.13	B0205.13	2337	3	89	296	no	2	73	370	MLQCLVLAIGLENRIVSGIRFTNFPPTRMHLKFHSALNEKKVLVHFSDIHGGIIIISVGINIIIGLRIL
T25G3.3	T25G3.3.2	2341	1	201	366	no	2	7	1546	MDESRTGIQRTSFDLLEKVEANANESSSDRCVLCMDRSSLQAYQSENHNSKGSIH
T25G3.3	T25G3.3.2	2342	3	1526	1715	no	2	7	1546	MMKLCKSNLRSISKFRFSPYCCLLYFCLQSDHCSNLFLLLACCSVITFCLLKIPRFLFVLLIF
T25G3.3	T25G3.3.2	2343	3	425	635	no	2	7	1546	MIVVVLKPKISGVLVCKFVNVQSSRRLFSIWNNFSSNTPLTKNVLESSLFRLELIFTLRNNKKRENLSTF
T25G3.3	T25G3.3.1	2345	1	423	633	no	3	5	1544	MIVVVLKPKISGVLVCKFVNVQSSRRLFSIWNNFSSNTPLTKNVLESSLFRLELIFTLRNNKKRENLSTF
T25G3.3	T25G3.3.1	2346	1	1524	1713	no	3	5	1544	MMKLCKSNLRSISKFRFSPYCCLLYFCLQSDHCSNLFLLLACCSVITFCLLKIPRFLFVLLIF
T25G3.3	T25G3.3.1	2347	2	199	364	no	3	5	1544	MDESRTGIQRTSFDLLEKVEANANESSSDRCVLCMDRSSLQAYQSENHNSKGSIH
C35E7.8	C35E7.8	2349	2	250	466	no	1	0	1149	MITWNSKWSTWKIKRQLTRHRHSMSFMKARCRNISIIRAISPMSTGFGHYFSTKITMKRCRHLSYKRQFVQL
F30A10.12	F30A10.12	2354	3	308	494	no	2	112	541	MYRRKRIREMRRRRKRKRMKRKKKRRMKKRKLQKNRKRRRRSLSRSRPSRRKMKGTMVNTRT
ZK265.6	ZK265.6	2358	3	140	356	no	2	7	574	MKLRLLEKTSATWVSHLIQMTRFQSLNTEKRSSTRSQLTVSVLLFPNRKRKLLEEKRMRNRQHTLSQIWNSK
Y106G6H.4	Y106G6H.4	2361	3	8	140	no	1	0	702	MESPKSSGPSKSVYFYRSYTTFSHDTCCSSAKRRGSVHDASSNR
F59C6.6	F59C6.6	2363	1	144	264	no	3	50	485	MMSLLPTCQWTFFLKHKCSDTKILWIDGQTRKENLISKPM
F59C6.6	F59C6.6	2364	1	294	474	no	3	50	485	MSLSFTDAGNLKKFHIVAIGKSSNQSHHSMSLLTRRLLMRRKCTTLEKSIFALRILPKLL
F26E4.3	F26E4.3.1	2366	2	1471	1609	no	2	85	1441	MFHLLPRPSFYNNLTAIAGFSNLFFFSTPIISTQSYLDYSPNKYRF
F26E4.3	F26E4.3.1	2367	3	1133	1322	no	2	85	1441	MLEEFINILILLLKKEHLPLQRDIIRFEFWDGELITQQENQSNTGCVPIHGELSGEKMDISKF
F26E4.3	F26E4.3.1	2368	3	212	545	no	2	85	1441	MMIVLFQFLEIIYVIVICSVIEVPMEETTVVRTLRPLAAEKTFKMTKGSTEKVARWMEIQRKKTVKNALVTMVSGSVMVLHVLFNQIFLRKSILDDTHGLPVTIRHFGVEA
F26E4.3	F26E4.3.2	2370	2	1423	1561	no	2	37	1393	MFHLLPRPSFYNNLTAIAGFSNLFFFSTPIISTQSYLDYSPNKYRF
F26E4.3	F26E4.3.2	2371	3	1085	1274	no	2	37	1393	MLEEFINILILLLKKEHLPLQRDIIRFEFWDGELITQQENQSNTGCVPIHGELSGEKMDISKF
F26E4.3	F26E4.3.2	2372	3	164	497	no	2	37	1393	MMIVLFQFLEIIYVIVICSVIEVPMEETTVVRTLRPLAAEKTFKMTKGSTEKVARWMEIQRKKTVKNALVTMVSGSVMVLHVLFNQIFLRKSILDDTHGLPVTIRHFGVEA
F25H2.12	F25H2.12b	2376	2	4	145	no	1	111	1431	MESSKFDEVVSKYRRILNSRSIEYFASSSWDLLEDEWREYLNLESTS
W01B11.2	W01B11.2	2378	1	1011	1659	no	2	97	2566	MALQEGSSEVSDGAGSGGQHDTDSSLHAEHCLRVPNPDSWTSDKWNTCSSDSADEKCVWNDGLGDVNCNNLICDSHFALQVDIEEASIRCELESGMVCLGAHAHDIFIFRMFRWRFITRKNDDASEMWNQISAIDSHHIHCAHHFCVWRSCWMYSALAETGARVDCGCCDEGLVHSDFHLLRVEEIEFCGLSNLRCNVHLRNRAKCQFRPAHWCGI
W01B11.2	W01B11.2	2379	1	369	639	no	2	97	2566	MEIQFSCGFSWWTYGVCVECAAESGLRNACWSPTKLRPNHWNHRSNNLRVIRNIQTLISWSICNRLINGWNSCGKLWRCWLNKWNNRFEC
W01B11.2	W01B11.2	2380	3	2132	2345	no	2	97	2566	MSTTTTRQSAFRFFLQILMNTFARTLKLRSSSKKYPGVECLSVFPMRLTRRSSSNDTRPRQFRQRQLRKQQ
W01B11.2	W01B11.2	2381	3	602	752	no	2	97	2566	MLAQQMEQSIRMLIYFAVERISHEYLMEMRSELQHLSRCSSDYFRYCSDC
T03F1.10	T03F1.10	2383	1	324	477	no	3	20	944	MVPTLIIKTIKLGSQLHLDQLPACNLRLELPNGKLQIVRINYHLYVLPLQL
Y48G1BL.1	Y48G1BL.1	2387	1	51	384	no	2	124	1078	MSSRSSLRLYALKRSHFSPKHPQRNANFSSGSNARESFQQATGLSEKITEDIYRQIDVSHISSMVFNREMDGGIERNRLGSQAILLDENSRRRNPQFKSIALRSPLRSHRS
Y48G1BL.1	Y48G1BL.1	2388	3	23	218	no	2	124	1078	MSMDIVMKSDEQPFISAPVCFKTFAFFAKASAEECKLLFGLQRSRKFPAGHGALGEDHGRHLPPN
F10G8.7	F10G8.7.1	2390	3	647	821	no	2	13	799	MRIVFYSISALFKQFQQLPKHQFLHVLVSDQSKLKIYTLFFMQLFHLTSRINRYSFKV
F10G8.7	F10G8.7.2	2392	3	647	821	no	2	13	799	MRIVFYSISALFKQFQQLPKHQFLHVLVSDQSKLKIYTLFFMQLFHLTSRINRYSFKV
W05F2.3	W05F2.3	2394	1	573	759	no	3	0	668	MMDALPRILNRFFQPKTPNAHATIHRTATRISKLSVTILSSHPTLLPLTFIYSNLFCIFRIQ
R05D7.3	R05D7.3	2396	3	194	314	yes	1	0	1200	MGSLPGGYLRMHHHLRRPCHDGFRIFRQTFLGESRNNRWF
Y71G12B.5	Y71G12B.5	2398	2	667	934	no	1	0	2847	MDSVQLHLKLSSSCAHRDLSWSVEVFRLVLKDIFLLAIIPTWLQISSWIDYLIQLLLGILILFWDFSVQTSPSKDAREHIIKLKLSRQS
Y71G12B.5	Y71G12B.5	2399	2	2029	2158	no	1	0	2847	MDVNPVITSTTLLRCSRDMQDLLLKCGSPLLDLLTITLKSSTP
Y47H9C.2	Y47H9C.2	2402	1	357	483	yes	2	130	1342	MAIPPGKKSIRVWWATCVLTEPWSICGYCNSDDCHFDSVFRF
Y47H9C.2	Y47H9C.2	2403	1	1206	1386	no	2	130	1342	MLQEFFWKTVQVQISKLTRRPRLPGPTSDNRNPSSEKIGKIDRKSLNYRFFVPLLLVTGY
Y47H9C.2	Y47H9C.2	2404	3	962	1091	no	2	130	1342	MSCEKLPGLQSSLSYAFSQRGQLLVWHASILIFCARILRQMKI
Y71G12B.20	Y71G12B.20b	2407	1	333	486	no	3	125	647	MCSPKNNWCSASPKNPSVVRRPVTSDCAARRLDFWRLRITSTRFMFARRLA
Y71G12B.20	Y71G12B.20b	2408	3	710	842	no	3	125	647	MSLLKKMTKNTQLFYKNYQKTSLNFAKIFVAQKVGRSVAFATLX
Y71G12B.20	Y71G12B.20a	2410	1	1653	1836	no	3	125	2099	MRNQSAGFRAHGLEEYHQSAPLSRSLPLRMSTWATGSVWLEPRMGCGRRMGGVLRVGNGTW
Y71G12B.20	Y71G12B.20a	2411	1	1482	1638	no	3	125	2099	MTWHFCLPNSSLSRLEPVSPNSQLLDARSNHPVLSAPLIPTAAGMRSTRNAR
Y71G12B.20	Y71G12B.20a	2412	1	1944	2109	no	3	125	2099	MKTVPARQVSPNIVRANVNGARKPMPIRQHSIFGVTPIRRMFSARPIHRVLIEQS
Y71G12B.20	Y71G12B.20a	2413	1	333	486	no	3	125	2099	MCSPKNNWCSASPKNPSVVRRPVTSDCAARRLDFWRLRITSTRFMFARRLA
Y71G12B.20	Y71G12B.20a	2414	1	759	999	no	3	125	2099	MSRNSSAHLMSDSMCSSFSVKLHMITRSASESFIVVWQEFVKRILAGEMYCDKFGRHLSRLDLIVRFLQISRFISIIFNP
Y71G12B.20	Y71G12B.20a	2415	2	1081	1309	no	3	125	2099	MHVPTLFNQSSPRHRPPNGRDCERAVFGDRRRDSGSSPGNVLTKLAQHFGYGSSLCKNASPGFRFHIRRNPDSATP
Y54E10A.16	Y54E10A.16a.2	2419	1	1323	1605	no	2	103	1384	MFRRQMLQSLVASNPFALSEMIIMYFISFFSKFFETKLPFSRLVLNLVVDPVYLRIFFSIATTFLPLASSSYSCFCRLSCQQNLKRCPPSQKKL
Y54E10A.16	Y54E10A.16a.2	2420	3	608	746	no	2	103	1384	MPMVLCGGADRAENVEKNGSSQRSQCTRAHSSSIPECRSTNSSYLC
Y54E10A.16	Y54E10A.16a.2	2421	3	1559	1727	no	2	103	1384	MSTKSQKVPPVPKETVIFSCNIAVFRLSHPKCEYKSRELDLLLSFQNPRISRIFLC
Y54E10A.16	Y54E10A.16a.1	2423	2	1468	1636	no	1	12	1293	MSTKSQKVPPVPKETVIFSCNIAVFRLSHPKCEYKSRELDLLLSFQNPRISRIFLC
Y54E10A.16	Y54E10A.16a.1	2424	2	517	655	no	1	12	1293	MPMVLCGGADRAENVEKNGSSQRSQCTRAHSSSIPECRSTNSSYLC
Y54E10A.16	Y54E10A.16a.1	2425	3	1232	1514	no	1	12	1293	MFRRQMLQSLVASNPFALSEMIIMYFISFFSKFFETKLPFSRLVLNLVVDPVYLRIFFSIATTFLPLASSSYSCFCRLSCQQNLKRCPPSQKKL
Y105E8B.9	Y105E8B.9	2427	2	907	1039	no	1	0	1884	MENWQISIGNNLDSVLLHGQTRRFSSTRSRFIVLDLECTRISRL
Y105E8B.9	Y105E8B.9	2428	3	959	1157	no	1	0	1884	MVRLADFHQLEAVLLSWIWNARGFRDYRPWIQPSYHDKRLESTRMDGWKLLPNNPLSIFRRTNVRE
F33D11.9	F33D11.9a	2431	1	99	249	no	2	40	886	MDQNSRIPISSGPFGIPRARILLLHCNYICISNNWNNICSSMDAMAICWY
F33D11.9	F33D11.9a	2432	2	907	1030	no	2	40	886	MKKKPCIILVTFPWLYLFSIFLKKLILFILSVFPISNIIHF
F33D11.9	F33D11.9a	2433	3	761	899	yes	2	40	886	MVQNHKEVWEFLEMEAMTMMVMMMMGHKKPIGAIQQRRIRESDRIS
F33D11.9	F33D11.9b	2435	1	2049	2172	no	1	0	2028	MKKKPCIILVTFPWLYLFSIFLKKLILFILSVFPISNIIHF
F33D11.9	F33D11.9b	2436	2	1903	2041	yes	1	0	2028	MVQNHKEVWEFLEMEAMTMMVMMMMGHKKPIGAIQQRRIRESDRIS
F33D11.9	F33D11.9b	2437	3	1241	1391	no	1	0	2028	MDQNSRIPISSGPFGIPRARILLLHCNYICISNNWNNICSSMDAMAICWY
C32F10.2	C32F10.2	2439	2	268	571	no	1	21	2904	MKLDEKKKTKNKMKIPEHQCHLHWEKMMIMRRMMLIVLLIKLIHRHHHNHFWKDVEQLIYQMTLLLVHGKRTTTRFNGFLLRVRNRRGNYQQFTIIFYQKE
C32F10.2	C32F10.2	2440	2	1039	1180	no	1	21	2904	MIVRLFELFAHNLVEVFLMHGTFLIILLRKWRRLEFRPLGIFKSFEI
Y37E3.11	Y37E3.11a	2442	2	151	325	no	1	9	1119	MMKRFDYIKDLQYSMNKSDIEWLPALNGSMKLWKMRHTPQQSKLWTSMIVIFVFTETT
Y37E3.11	Y37E3.11a	2443	2	817	1006	no	1	9	1119	MKLCSVLHMRLLLTFWISLMFRQLSTDSVTTTPQSSTHRLHRSTRSQKPNVVESTMKWTREVI
Y37E3.11	Y37E3.11b	2445	2	151	325	no	1	9	1140	MMKRFDYIKDLQYSMNKSDIEWLPALNGSMKLWKMRHTPQQSKLWTSMIVIFVFTETT
Y37E3.11	Y37E3.11b	2446	2	838	1027	no	1	9	1140	MKLCSVLHMRLLLTFWISLMFRQLSTDSVTTTPQSSTHRLHRSTRSQKPNVVESTMKWTREVI
F43G9.9	F43G9.9.1	2448	1	345	519	no	3	35	611	MCKSRNSSRLLISTKDRTQMLSSSVSLLWHESLRRTSVDLVSDRRKLKEIVVNGPMSN
F43G9.9	F43G9.9.2	2450	3	416	590	no	2	106	682	MCKSRNSSRLLISTKDRTQMLSSSVSLLWHESLRRTSVDLVSDRRKLKEIVVNGPMSN
C55C2.4	C55C2.4	2452	2	286	448	no	1	0	705	MTITTWRKTREMCLWPPIELIKTTNWLKNSRHPLIFHTNRIYSNSTVYLPVLYF
C55C2.4	C55C2.4	2453	2	472	610	no	1	0	705	MFSEFSMRIRKRMMMTKIMMMRKRIREMVDMGSTLKSTCVWSLACP
F53G12.3	F53G12.3	2455	2	3676	3841	no	1	0	4509	MQKSFHQILYTSSTVVQENLNINQDNGLLYHHHLYHVPLMNLTHSRLPQVHRMRI
F53G12.3	F53G12.3	2456	2	2266	2422	no	1	0	4509	MRRILFSCPKQSQKNAVKTDWTCSSVKPTQKHSMIVNFKIRKLHLTHRMMIY
F53G12.3	F53G12.3	2457	2	415	586	no	1	0	4509	MYLITNARGKLQSHFTVQNTTKQLEMVLTRLENKSMNGLHGLMDHSSMVPPSHGCPH
F53G12.3	F53G12.3	2458	2	2575	2755	no	1	0	4509	MLLKSKNCKLYSKCVIWRERTRYSERISQNSSSPSIKPPEFTLPKVCSFDYSMTCCTSLE
F53G12.3	F53G12.3	2459	2	4027	4156	no	1	0	4509	MHPRLLILYKKHQVTRFIEFDVVKYISYGCVRVTRTLNGLWIC
F53G12.3	F53G12.3	2460	3	2882	3008	no	1	0	4509	MPHLIPNSGPLYSCSTFSDSENLCIPGNLSPTRLHHLLLCRH
M04C9.4	M04C9.4	2462	2	991	1117	no	1	0	1350	MFQMHQKHFYNRWEKMQAKKWNDVENSVDRPEKLVSELWQQL
M04C9.4	M04C9.4	2463	2	268	481	no	1	0	1350	MKTVMKKFTTRACMKVKRNTPILLLLLIRWKNVFKIIKSENWAAVLWKDWKPALWQMFNLKNFVDRELSPK
C18E3.9	C18E3.9a	2465	1	939	1071	no	2	85	979	MREATHPLSLRQHLMQLANFHILSYQFTYIHIQWKCYLWVLVKH
C18E3.9	C18E3.9a	2466	3	344	464	no	2	85	979	MINITLFRKRSRVITRTLKYMPEAMHRNHLETNMTEVSTF
C18E3.9	C18E3.9b	2468	1	951	1083	no	2	85	991	MREATHPLSLRQHLMQLANFHILSYQFTYIHIQWKCYLWVLVKH
C18E3.9	C18E3.9b	2469	3	344	464	no	2	85	991	MINITLFRKRSRVITRTLKYMPEAMHRNHLETNMTEVSTF
C01H6.9	C01H6.9	2471	2	127	397	no	1	0	2847	MSFQKIRRCLSRLMIIQSSNQAKRRISQNQCSHHLQMSVMSKYQVMRKMLDNLKCLMQMLMKKKKLRKSRKHLIHWMMFLSKSSIMMELE
C01H6.9	C01H6.9	2472	2	1789	2032	no	1	0	2847	MLLVKKNQKRGIVYRSRLSMVEELRNSAKEPTVKSSQQYGMVNRLLSKSSHLKKMDAIGNISVNIILRKCKHPMSFCLKLS
C01H6.9	C01H6.9	2473	2	865	1153	no	1	0	2847	MRVLRLKSRQLEEDPKASQYLMFPSMILARISRKKKNKSHKNLQILIKKRLPSTISRSKRNTVEEFMNHHWLEVYNNHSKILKKLQSPKIVSHILH
Y110A7A.4	Y110A7A.4	2475	1	768	891	no	3	11	947	MLMSTQIMWMLSKFNWTVSHTLSPKFDSRETWPQSMISLLI
Y110A7A.4	Y110A7A.4	2476	1	411	714	no	3	11	947	MDFNGDTLGRNMWIVIQITLDKVLISWLKLSDRLRSNRIVEESLCPRGIRRILDKWFCHRVTQCVSSMWTMESSRVSFTNEVEIWVSEFHSTLPATAFSPT
F55F8.9	F55F8.9a.2	2478	1	372	540	no	3	8	1412	MDMDMVTDMIIIIMKLHLHWLQKVSKLLALEDVVWLILLMKLRKKKTTLLLMKRLH
F55F8.9	F55F8.9a.2	2479	1	1341	1509	yes	3	8	1412	MVILIVARQNHISMEIHLLMTMDINYSKIILFFDKLISSHNQFSFHAYHKITLTNP
F55F8.9	F55F8.9a.2	2480	1	870	996	no	3	8	1412	MLILMEYDQLHLYWHWEFIQLLKVSHLEFNQEMIRLLLYSYH
F55F8.9	F55F8.9a.2	2481	2	1786	1921	no	3	8	1412	MLKLFLFSIPHNVVLCFYFYSHMPPLVFPHKKCFNLSIKNNAENQ
F55F8.9	F55F8.9a.1	2483	1	1788	1923	no	2	10	1414	MLKLFLFSIPHNVVLCFYFYSHMPPLVFPHKKCFNLSIKNNAENQ
F55F8.9	F55F8.9a.1	2484	3	872	998	no	2	10	1414	MLILMEYDQLHLYWHWEFIQLLKVSHLEFNQEMIRLLLYSYH
F55F8.9	F55F8.9a.1	2485	3	374	542	no	2	10	1414	MDMDMVTDMIIIIMKLHLHWLQKVSKLLALEDVVWLILLMKLRKKKTTLLLMKRLH
F55F8.9	F55F8.9a.1	2486	3	1343	1511	yes	2	10	1414	MVILIVARQNHISMEIHLLMTMDINYSKIILFFDKLISSHNQFSFHAYHKITLTNP
F55F8.9	F55F8.9b.1	2488	1	1680	1815	no	2	10	1306	MLKLFLFSIPHNVVLCFYFYSHMPPLVFPHKKCFNLSIKNNAENQ
F55F8.9	F55F8.9b.1	2489	3	374	542	no	2	10	1306	MDMDMVTDMIIIIMKLHLHWLQKVSKLLALEDVVWLILLMKLRKKKTTLLLMKRLH
F55F8.9	F55F8.9b.1	2490	3	764	890	no	2	10	1306	MLILMEYDQLHLYWHWEFIQLLKVSHLEFNQEMIRLLLYSYH
F55F8.9	F55F8.9b.1	2491	3	1235	1403	yes	2	10	1306	MVILIVARQNHISMEIHLLMTMDINYSKIILFFDKLISSHNQFSFHAYHKITLTNP
F55F8.9	F55F8.9b.2	2493	1	762	888	no	3	8	1304	MLILMEYDQLHLYWHWEFIQLLKVSHLEFNQEMIRLLLYSYH
F55F8.9	F55F8.9b.2	2494	1	372	540	no	3	8	1304	MDMDMVTDMIIIIMKLHLHWLQKVSKLLALEDVVWLILLMKLRKKKTTLLLMKRLH
F55F8.9	F55F8.9b.2	2495	1	1233	1401	yes	3	8	1304	MVILIVARQNHISMEIHLLMTMDINYSKIILFFDKLISSHNQFSFHAYHKITLTNP
F55F8.9	F55F8.9b.2	2496	2	1678	1813	no	3	8	1304	MLKLFLFSIPHNVVLCFYFYSHMPPLVFPHKKCFNLSIKNNAENQ
C41G7.2	C41G7.2	2498	1	1386	1545	yes	3	74	1835	MGARLVRTPFICGRSKHISHQLVFQQRANSNLWISQDRNVPRSLESVATSSRR
C41G7.2	C41G7.2	2499	1	1053	1203	no	3	74	1835	MGKPEVAKLTRCEEEMVKRKESSREQLHFSSLNPKSSSHLDGNSTSHCLS
C41G7.2	C41G7.2	2500	1	78	216	no	3	74	1835	MSLVEEVACFGLLSEHRRRPQEDVLPHHPSKKPIQQQSQDSRLLEE
C41G7.2	C41G7.2	2501	1	900	1044	no	3	74	1835	MPSKSMKARSLEMLSNSRMFSHQSSRRRKYSRTSRSSFGRHCMGTTSD
C41G7.2	C41G7.2	2502	2	1174	1333	no	3	74	1835	MEIRLLIVFPRSLQQRGIRPSQWPRRCPTSFERSNGFHDWAIRTHDFQCFGCG
F33H2.6	F33H2.6	2504	1	459	717	no	2	16	919	MVCHSTGLRWRDRGKQIENRKIIPSAETFREGVIDFRERSNNVAYFGSLALFLRQYGLRDSNGGQSYFRNSTSIHISGGSTLFPKG
F33H2.6	F33H2.6	2505	3	425	545	no	2	16	919	MSQRMDALEHINGMPFYWITLERSRETNRESKNHSKCGNI
Y48G1C.5	Y48G1C.5	2507	2	2176	2359	no	1	0	3483	MMVDWSFQVFKTDLMNRKRLLLLLTCFFQIYSSLCRLQFSHRQILEILKRMVHHHKHTDNM
Y48G1C.5	Y48G1C.5	2508	2	1825	1951	no	1	0	3483	MWILSRTMHKLCNESWQRVEPLWHRTIRIIWRSWWRLEHLWM
Y48G1C.5	Y48G1C.5	2509	2	808	928	no	1	0	3483	MHFQIKNRRSIFKPSNPSGSPCEPRSTQLVYRMEQLILEH
Y47G6A.28	Y47G6A.28	2511	2	748	895	no	1	0	1923	MFSDPPKDIRDTRIVQPHPMPRNLNFRTTRRVRKRRQTTRAVEVMRMKF
Y47G6A.28	Y47G6A.28	2512	2	1294	1519	yes	1	0	1923	MEQKSARIRLLIVSTVSCSRRKRRKQNWKRRIFQVRLEHQLLLKPSCRNQRKNRRKLHQNAKVNDDRKLWQQRSQ
Y47G6A.28	Y47G6A.28	2513	3	1673	1808	no	1	0	1923	MELEHRSDVDSRSEKCSRSKKGSTIFWSSSERISQRHSDDQFLGG
C18E3.3	C18E3.3	2515	1	672	828	no	3	0	2681	MEKMKSQQINLLEWVKDLRKFQKSKSLKSQSITRRRKERVGVKILLATVHLP
C18E3.3	C18E3.3	2516	1	513	669	no	3	0	2681	MLIDSIEVFWKLLLNIYTAIISCGKLMAEDDWKTKLIGIINIILLAQLVPMI
C18E3.3	C18E3.3	2517	1	1521	1668	yes	3	0	2681	MDILILKIIILKWNKKIHRIQKKISSKLLIHHLLQSHLHMEVMIQILSI
C18E3.3	C18E3.3	2518	1	840	1089	no	3	0	2681	MALLPSQRIFLCFNCLKRSEQLSTFNRLSKLWRLYNKEERDSLRMIQFLKMTQNDYALKNLLFALDQRFLVIQDLNLKHISKC
C18E3.3	C18E3.3	2519	1	1269	1473	no	3	0	2681	MKILLEIHLPVLFLHQLPFLQCPQFMKHTLRLHTTVLLHWKVLLSTLMTILTFSHLWSRQARDQRLPN
C18E3.3	C18E3.3	2520	2	2710	2848	no	3	0	2681	MHFLLFFVAISFPSTGSLPCFYDPPLPLNNLLSMFFLFLFYLCFDF
C18E3.3	C18E3.3	2521	2	322	493	no	3	0	2681	MDITRKLLCSALLFERTTRGKAYNDCGHSIVSNSDLFKANQGIENWKWPTKKTRGRF
F22D6.12	F22D6.12.2	2523	1	741	903	no	3	56	1364	MEHQMSKLQIINKHDSPERMKMNLHFHFSNPHYLQSFQEKLPISWHPPIQLESF
F22D6.12	F22D6.12.2	2524	1	408	570	no	3	56	1364	MECLCTRICHRFFFFSHQSIILKTSTVLRLVKILLPYFKTYSEKSQLVFQMYIL
F22D6.12	F22D6.12.2	2525	2	1363	1498	no	3	56	1364	MIFFFTITRLRVQFCWSFSIKSVYFLPFSSTRFGFSMISNKKDTL
F22D6.12	F22D6.12.2	2526	2	331	499	no	3	56	1364	MSNAENFISIQYKSNVSRRKTFSTILWNACVQGFATGSFSSLINLSSSKRVLYCGW
F22D6.12	F22D6.12.1	2528	2	685	847	no	1	0	1308	MEHQMSKLQIINKHDSPERMKMNLHFHFSNPHYLQSFQEKLPISWHPPIQLESF
F22D6.12	F22D6.12.1	2529	2	352	514	no	1	0	1308	MECLCTRICHRFFFFSHQSIILKTSTVLRLVKILLPYFKTYSEKSQLVFQMYIL
F22D6.12	F22D6.12.1	2530	3	275	443	no	1	0	1308	MSNAENFISIQYKSNVSRRKTFSTILWNACVQGFATGSFSSLINLSSSKRVLYCGW
F22D6.12	F22D6.12.1	2531	3	1307	1442	no	1	0	1308	MIFFFTITRLRVQFCWSFSIKSVYFLPFSSTRFGFSMISNKKDTL
F22D6.12	F22D6.12.3	2533	1	390	558	no	2	115	1423	MSNAENFISIQYKSNVSRRKTFSTILWNACVQGFATGSFSSLINLSSSKRVLYCGW
F22D6.12	F22D6.12.3	2534	1	1422	1557	no	2	115	1423	MIFFFTITRLRVQFCWSFSIKSVYFLPFSSTRFGFSMISNKKDTL
F22D6.12	F22D6.12.3	2535	3	467	629	no	2	115	1423	MECLCTRICHRFFFFSHQSIILKTSTVLRLVKILLPYFKTYSEKSQLVFQMYIL
F22D6.12	F22D6.12.3	2536	3	800	962	no	2	115	1423	MEHQMSKLQIINKHDSPERMKMNLHFHFSNPHYLQSFQEKLPISWHPPIQLESF
C01A2.3	C01A2.3.1	2538	2	127	358	no	1	15	1113	MTYSKSLKVHQFLIYHHFQLLQYLECLWMSSLLLEHLYWKNSDYGRGGNHLRILDGLLKAFTCTLTFPGGLQSLQLQ
C01A2.3	C01A2.3.1	2539	2	463	625	no	1	15	1113	MKLVKKIINFFNNRFFWNNEIFFDQKIFDWVVNLWLWLQMELYLLLNSLQLKRW
C01A2.3	C01A2.3.1	2540	2	1468	1600	yes	1	15	1113	MAREIEKKREKSDKELLILFQFLAIFAQICTFSVDFLIKKNRCX
C01A2.3	C01A2.3.2	2542	3	1466	1598	yes	2	13	1111	MAREIEKKREKSDKELLILFQFLAIFAQICTFSVDFLIKKNRCX
C01A2.3	C01A2.3.2	2543	3	461	623	no	2	13	1111	MKLVKKIINFFNNRFFWNNEIFFDQKIFDWVVNLWLWLQMELYLLLNSLQLKRW
C01A2.3	C01A2.3.2	2544	3	125	356	no	2	13	1111	MTYSKSLKVHQFLIYHHFQLLQYLECLWMSSLLLEHLYWKNSDYGRGGNHLRILDGLLKAFTCTLTFPGGLQSLQLQ
C43H8.2	C43H8.2	2546	3	734	995	no	2	226	961	MRQLCPVTVKYTASSPNSKTIRLPKTVAFGHLPSFSTTKDSNVLFFSQFVAYRNKPTRPSKFSPISVKTRRNHKRNRVQIIHVERLE
T02G6.4	T02G6.4	2548	2	43	250	no	1	0	360	MNWMIPLMEFFTLLKSLKIAKQFLLKIMKDNHIYRLTGWSCTYLEMPAPQHVELLHTYDVLTTTTTQML
F28B3.1	F28B3.1.1	2550	2	1438	1648	no	1	60	3981	MDPTDYARLMKSVKFVFLPTQQLNFIGLSMVKHITHSKWNQLENMENLSELSDMSEVDSSDLWVQMEWFS
F28B3.1	F28B3.1.1	2551	2	3685	3967	no	1	60	3981	MWRVLLAKRIVLLEIQPSSHGITLSLLPPNVLAPSRMLSISYQPSRQLSLRNIISSSESLSSWILDLSDMGQAVRSCGALFAPCFWRRSSIRYT
F28B3.1	F28B3.1.1	2552	2	745	952	no	1	60	3981	MRQLHILSIRLEMMELLKDVVLRGRLYLHIVEHSQLLWSIKKTKQWFVLWISNEKSASGMRSLLQYSTE
F28B3.1	F28B3.1.1	2553	2	2608	2767	no	1	60	3981	MHRHHGDERIIIIVIQRLLEVAELHRKKKYVISTFQSIHLDNFKDLQCQKRRR
F28B3.1	F28B3.1.1	2554	2	1135	1288	no	1	60	3981	MEQILGHSRRVMHLRPLLLHHHTVYVPMQCARVLEVLKLELFRFEDVEMLN
F28B3.1	F28B3.1.1	2555	2	2077	2227	no	1	60	3981	MLVLRRCLLEILFKVFELRLPREEILMMNRLSHCWNAYDLEPNLLRIIVF
F28B3.1	F28B3.1.1	2556	2	4123	4264	no	1	60	3981	MYHKIPCLTHKHTAYFFVGFLYLFLFSELSKLSSFFSPQIHTGSRHL
F28B3.1	F28B3.1.1	2557	3	3389	3509	no	1	60	3981	MRRFSSRRNLGGEYSQRIPIKSFGKCHWVRRRRNDEYGCL
F28B3.1	F28B3.1.2	2559	2	2833	2992	no	1	285	4206	MHRHHGDERIIIIVIQRLLEVAELHRKKKYVISTFQSIHLDNFKDLQCQKRRR
F28B3.1	F28B3.1.2	2560	2	4348	4489	no	1	285	4206	MYHKIPCLTHKHTAYFFVGFLYLFLFSELSKLSSFFSPQIHTGSRHL
F28B3.1	F28B3.1.2	2561	2	3910	4192	no	1	285	4206	MWRVLLAKRIVLLEIQPSSHGITLSLLPPNVLAPSRMLSISYQPSRQLSLRNIISSSESLSSWILDLSDMGQAVRSCGALFAPCFWRRSSIRYT
F28B3.1	F28B3.1.2	2562	2	970	1177	no	1	285	4206	MRQLHILSIRLEMMELLKDVVLRGRLYLHIVEHSQLLWSIKKTKQWFVLWISNEKSASGMRSLLQYSTE
F28B3.1	F28B3.1.2	2563	2	1360	1513	no	1	285	4206	MEQILGHSRRVMHLRPLLLHHHTVYVPMQCARVLEVLKLELFRFEDVEMLN
F28B3.1	F28B3.1.2	2564	2	1663	1873	no	1	285	4206	MDPTDYARLMKSVKFVFLPTQQLNFIGLSMVKHITHSKWNQLENMENLSELSDMSEVDSSDLWVQMEWFS
F28B3.1	F28B3.1.2	2565	2	2302	2452	no	1	285	4206	MLVLRRCLLEILFKVFELRLPREEILMMNRLSHCWNAYDLEPNLLRIIVF
F28B3.1	F28B3.1.2	2566	3	3614	3734	no	1	285	4206	MRRFSSRRNLGGEYSQRIPIKSFGKCHWVRRRRNDEYGCL
Y87G2A.11	Y87G2A.11	2568	3	680	857	no	1	3	1089	MRGRWLRQNLGYTFHVISSDVTTSPCSLGLECTISSGTRSIIADGRFRRFCSTFMCSKC
Y87G2A.11	Y87G2A.11	2569	3	362	497	no	1	3	1089	MSRMGAKFDEMCSNDAISTGNSTFKHGKWSGNCAKLENSAGKRGR
F27D4.6	F27D4.6a.3	2571	1	3033	3609	no	3	41	3065	MSTMYMGRPLFDTPTICKYCKIHLSGMTSVTVAKHAFSVMHITMMKQCGDRIQFSDYEWWIRLLEEEFHIKYNRGSFLIEYHLGFTPVESSSLAYPRFQEFTSAEKALISTFDESKMTSEATDKFNLLETLGGCCYCKKWCFTPVEALYHFLSQEHFTEVRKRHPVMKSEVDKVLNCIAHYQVQSSSRCTIM
F27D4.6	F27D4.6a.3	2572	2	2377	2524	yes	3	41	3065	MGGRGYSQKLETKDTGADQKFKCLRSVKGEGSNTKKRFHSSEISNTHSL
F27D4.6	F27D4.6b	2574	2	2377	2524	yes	3	41	3665	MGGRGYSQKLETKDTGADQKFKCLRSVKGEGSNTKKRFHSSEISNTHSL
F27D4.6	F27D4.6a.1	2576	1	3033	3186	no	3	41	3065	MSTMYMGRPLFDTPVSMRDQQHYCGQIKQINKIVGYVYRQYVSTAKYIYQE
F27D4.6	F27D4.6a.1	2577	2	2377	2524	yes	3	41	3065	MGGRGYSQKLETKDTGADQKFKCLRSVKGEGSNTKKRFHSSEISNTHSL
F27D4.6	F27D4.6a.1	2578	3	3185	3683	no	3	41	3065	MTSVTVAKHAFSVMHITMMKQCGDRIQFSDYEWWIRLLEEEFHIKYNRGSFLIEYHLGFTPVESSSLAYPRFQEFTSAEKALISTFDESKMTSEATDKFNLLETLGGCCYCKKWCFTPVEALYHFLSQEHFTEVRKRHPVMKSEVDKVLNCIAHYQVQSSSRCTIM
F27D4.6	F27D4.6a.2	2580	2	2377	2524	yes	3	41	3065	MGGRGYSQKLETKDTGADQKFKCLRSVKGEGSNTKKRFHSSEISNTHSL
F27D4.6	F27D4.6a.2	2581	3	3134	3632	no	3	41	3065	MTSVTVAKHAFSVMHITMMKQCGDRIQFSDYEWWIRLLEEEFHIKYNRGSFLIEYHLGFTPVESSSLAYPRFQEFTSAEKALISTFDESKMTSEATDKFNLLETLGGCCYCKKWCFTPVEALYHFLSQEHFTEVRKRHPVMKSEVDKVLNCIAHYQVQSSSRCTIM
C03D6.6	C03D6.6	2585	3	389	542	no	2	46	529	MNWTKIMKKCRKRKHLIHMIRIPIHPRIPTSMRILRILIKRCVLVNHEINH
F31C3.4	F31C3.4	2587	2	382	508	no	1	0	954	MYSDMLDTIFIVIIMSIKDLKMVNHKKKETKLPPNRVLELPC
F31C3.4	F31C3.4	2588	3	53	242	no	1	0	954	MGRAWRTGRTEGCTPRRIAHRSVRAHVCSRNDSHVSKRRMGAEPYSLVHLVHRWWSFSRRLPS
F32H2.11	F32H2.11	2590	2	598	745	no	1	27	1119	MALIMEHFIFFFNRASILSCQKNLKFVGKYGNKHRISRTCSHLKHVFVL
Y73E7A.9	Y73E7A.9	2593	2	331	484	no	1	0	1674	MILKRARVKNGSSMEGLSEFALLSTIPHFFGPLLSVIMEFNNSTLEPRIPK
Y73E7A.9	Y73E7A.9	2594	2	1288	1480	yes	1	0	1674	MVEVQIIRQILKKQIFLVQEINILSPVLTAVICTSGIAIRQKFKESSKRTIIFSISVNHILINL
Y87G2A.7	Y87G2A.7	2597	2	133	262	no	1	0	1467	MMNVIGKNQRHIKKAQKVIQITVTEKKQLLSNGKSSIRNWTKL
Y40B1B.5	Y40B1B.5.2	2604	3	233	401	no	2	16	652	MISRWLVICSEMMILLKPLTKRRPMRISCRKPISSTGESVSVDFWLHGVKHPVMEI
Y40B1B.5	Y40B1B.5.1	2606	2	235	403	no	1	18	654	MISRWLVICSEMMILLKPLTKRRPMRISCRKPISSTGESVSVDFWLHGVKHPVMEI
T23D8.4	T23D8.4.1	2608	1	771	912	no	3	0	2696	MTRKKRRRELSESKKLSRKTMMRIGLQLIVRSLLFTLIPRKKLLMTL
T23D8.4	T23D8.4.1	2609	1	1680	1932	no	3	0	2696	MSTLKSSTTELSANSVSALSDTVSFAKLIKDYLKFKIPNVPRSCLLKLLELVSTKRLLNKRRLIVPVKFHIICTSMLNLWSVSI
T23D8.4	T23D8.4.1	2610	1	2481	2820	no	3	0	2696	MNKFWSRALDVVVIKVQDRGFQEGTSGKEISRKDLVDTKENDVEDKDKTESEEIGDLKVVSNVVILKSHEPSKYPFFNRLSHSWNPLIRLSWRLQLVSKTFCRRQYLLNLLFN
T23D8.4	T23D8.4.2	2612	2	778	919	no	1	9	2703	MTRKKRRRELSESKKLSRKTMMRIGLQLIVRSLLFTLIPRKKLLMTL
T23D8.4	T23D8.4.2	2613	2	2488	2827	no	1	9	2703	MNKFWSRALDVVVIKVQDRGFQEGTSGKEISRKDLVDTKENDVEDKDKTESEEIGDLKVVSNVVILKSHEPSKYPFFNRLSHSWNPLIRLSWRLQLVSKTFCRRQYLLNLLFN
T23D8.4	T23D8.4.2	2614	2	1687	1939	no	1	9	2703	MSTLKSSTTELSANSVSALSDTVSFAKLIKDYLKFKIPNVPRSCLLKLLELVSTKRLLNKRRLIVPVKFHIICTSMLNLWSVSI
F59A3.9	F59A3.9	2616	2	988	1129	yes	1	0	1446	MECQRIAVLLSSRIHCWKFRETVLEPSVSRTTWKEFNSSLERSTSEF
F59A3.9	F59A3.9	2617	3	629	767	yes	1	0	1446	MGGKLWSRRSQQRTAQQFFPLFDAHPLSSDGSSSSKHSRNISRVEW
F59A3.9	F59A3.9	2618	3	962	1106	yes	1	0	1446	MVKDKSSKKWNAKGLPFYCRRGSIVGNSEKLCWNRPSAELHGKNSTRV
F56H6.6	F56H6.6	2620	2	262	415	yes	1	0	1164	MGLYHSGCLLTITPRRLWNMWQCFISVIRSSGRKSPFTMCSELLLPRWIVQ
T01G9.2	T01G9.2a.1	2622	3	428	548	no	2	16	1282	MMISTISMCKVGRDYLSVSHMEEKIRIWKSGLDLVEIFVR
T01G9.2	T01G9.2a.1	2623	3	554	869	no	2	16	1282	MMPTLNQNLPRCPFIVDQIHLSQNPWILHSRVIVVKIGREKSKQFGKMGILLELIFNLILKTEELSMESMMYPRTHDKSILETLFRMCNRFLEPRQRSSTSPMTR
T01G9.2	T01G9.2a.1	2624	3	1127	1379	no	2	16	1282	MTQIRLVQWFLLAKSNNHLDPHSATESNKLLSKEPRMDSSLQSPFMMEPRKNNYVLYTFVSYSAKCCKVPAFKSLPIIFKFPLN
T01G9.2	T01G9.2a.2	2626	2	1129	1381	no	1	18	1284	MTQIRLVQWFLLAKSNNHLDPHSATESNKLLSKEPRMDSSLQSPFMMEPRKNNYVLYTFVSYSAKCCKVPAFKSLPIIFKFPLN
T01G9.2	T01G9.2a.2	2627	2	556	871	no	1	18	1284	MMPTLNQNLPRCPFIVDQIHLSQNPWILHSRVIVVKIGREKSKQFGKMGILLELIFNLILKTEELSMESMMYPRTHDKSILETLFRMCNRFLEPRQRSSTSPMTR
T01G9.2	T01G9.2a.2	2628	2	430	550	no	1	18	1284	MMISTISMCKVGRDYLSVSHMEEKIRIWKSGLDLVEIFVR
T01G9.2	T01G9.2b.1	2630	2	1120	1372	no	1	18	1275	MTQIRLVQWFLLAKSNNHLDPHSATESNKLLSKEPRMDSSLQSPFMMEPRKNNYVLYTFVSYSAKCCKVPAFKSLPIIFKFPLN
T01G9.2	T01G9.2b.1	2631	2	547	862	no	1	18	1275	MMPTLNQNLPRCPFIVDQIHLSQNPWILHSRVIVVKIGREKSKQFGKMGILLELIFNLILKTEELSMESMMYPRTHDKSILETLFRMCNRFLEPRQRSSTSPMTR
T01G9.2	T01G9.2b.1	2632	2	421	541	no	1	18	1275	MMISTISMCKVGRDYLSVSHMEEKIRIWKSGLDLVEIFVR
T01G9.2	T01G9.2b.2	2634	3	1118	1370	no	2	16	1273	MTQIRLVQWFLLAKSNNHLDPHSATESNKLLSKEPRMDSSLQSPFMMEPRKNNYVLYTFVSYSAKCCKVPAFKSLPIIFKFPLN
T01G9.2	T01G9.2b.2	2635	3	545	860	no	2	16	1273	MMPTLNQNLPRCPFIVDQIHLSQNPWILHSRVIVVKIGREKSKQFGKMGILLELIFNLILKTEELSMESMMYPRTHDKSILETLFRMCNRFLEPRQRSSTSPMTR
T01G9.2	T01G9.2b.2	2636	3	419	539	no	2	16	1273	MMISTISMCKVGRDYLSVSHMEEKIRIWKSGLDLVEIFVR
T01H8.1	T01H8.1e	2638	2	61	208	no	1	6	2418	MYHQALISARITGWMSQCDRIQRIVLVTPPTPFTAASTSFNHRQIMDFD
T01H8.1	T01H8.1e	2639	2	700	856	no	1	6	2418	MLMVTSKSQISGSAKKQSIVRRKLIVSVEQWNIWLQKLLIGVDIQWLQISGL
T01H8.1	T01H8.1e	2640	2	2329	2476	no	1	6	2418	MCQQMHVAEPTDQCQILANRSPKCTVETTCKYIDSFLRTDFTFFFFKYY
T01H8.1	T01H8.1e	2641	2	1885	2005	no	1	6	2418	MSGPLEFYFTQCSPAALRSRWVQMIHLIRYYNVLEMERFQ
T01H8.1	T01H8.1e	2642	2	259	391	no	1	6	2418	MSESVVRRPILDSLNCSKSSAKDHLERSFWCEKYVDEIQGMSMQ
T01H8.1	T01H8.1e	2643	2	1264	1405	no	1	6	2418	MQLWRRESLSQSLSDLYQQQKQIHSLMTMRFSRKLEMVHIRWFTSAK
T01H8.1	T01H8.1e	2644	2	2068	2296	no	1	6	2418	MSIQIEESQQNKHCNISGSDKRKHFRIGQFNQNKLESLICKMSSFRLHLSRHIKQSHRLQVFNFVQLDRLHLRNDE
T01H8.1	T01H8.1e	2645	3	2345	2513	no	1	6	2418	MLQNRPINVKFLPTAHQNVPSRRLVNTSIHFYARILLFSFLNTTNIYPIVSTNAPH
T01H8.1	T01H8.1c	2647	1	1818	1938	no	3	38	2273	MSGPLEFYFTQCSPAALRSRWVQMIHLIRYYNVLEMERFQ
T01H8.1	T01H8.1c	2648	1	633	789	no	3	38	2273	MLMVTSKSQISGSAKKQSIVRRKLIVSVEQWNIWLQKLLIGVDIQWLQISGL
T01H8.1	T01H8.1c	2649	1	2256	2397	no	3	38	2273	MCQQMHEPTDQCQILANRSPKCTVETTCKYIDSFLRTDFTFFFFKYY
T01H8.1	T01H8.1c	2650	1	111	324	no	3	38	2273	MYHQALISARITGWIPIHHQKPKLTLEMSESVVRRPILDSLNCSKSSAKDHLERSFWCEKYVDEIQGMSMQ
T01H8.1	T01H8.1c	2651	1	1197	1338	no	3	38	2273	MQLWRRESLSQSLSDLYQQQKQIHSLMTMRFSRKLEMVHIRWFTSAK
T01H8.1	T01H8.1c	2652	1	2001	2223	no	3	38	2273	MSIQIEESQQNKHCNISGSDKRKHFRIGQFNQNKLESLICKMSRLHLSRHIKQSHRLQVFNFVQLDRLHLRNDE
T01H8.1	T01H8.1c	2653	2	2272	2434	no	3	38	2273	MNRPINVKFLPTAHQNVPSRRLVNTSIHFYARILLFSFLNTTNIYPIVSTNAPH
T01H8.1	T01H8.1d	2655	1	2274	2415	no	1	39	2241	MCQQMHEPTDQCQILANRSPKCTVETTCKYIDSFLRTDFTFFFFKYY
T01H8.1	T01H8.1d	2656	2	694	850	no	1	39	2241	MLMVTSKSQISGSAKKQSIVRRKLIVSVEQWNIWLQKLLIGVDIQWLQISGL
T01H8.1	T01H8.1d	2657	2	1879	1999	no	1	39	2241	MSGPLEFYFTQCSPAALRSRWVQMIHLIRYYNVLEMERFQ
T01H8.1	T01H8.1d	2658	2	253	385	no	1	39	2241	MSESVVRRPILDSLNCSKSSAKDHLERSFWCEKYVDEIQGMSMQ
T01H8.1	T01H8.1d	2659	2	1258	1399	no	1	39	2241	MQLWRRESLSQSLSDLYQQQKQIHSLMTMRFSRKLEMVHIRWFTSAK
T01H8.1	T01H8.1d	2660	2	2290	2452	no	1	39	2241	MNRPINVKFLPTAHQNVPSRRLVNTSIHFYARILLFSFLNTTNIYPIVSTNAPH
T01H8.1	T01H8.1d	2661	3	2135	2291	no	1	39	2241	MQNVKVALEQTYKAIASAPSVQLRPVGSSALAKRRMKEILYANYTKNVSANA
T01H8.1	T01H8.1b	2663	2	694	850	no	1	153	2334	MLMVTSKSQISGSAKKQSIVRRKLIVSVEQWNIWLQKLLIGVDIQWLQISGL
T01H8.1	T01H8.1b	2664	2	1879	1999	no	1	153	2334	MSGPLEFYFTQCSPAALRSRWVQMIHLIRYYNVLEMERFQ
T01H8.1	T01H8.1b	2665	2	2317	2458	no	1	153	2334	MCQQMHEPTDQCQILANRSPKCTVETTCKYIDSFLRTDFTFFFFKYY
T01H8.1	T01H8.1b	2666	2	190	385	no	1	153	2334	MKSNKEKKRPIHHQKPKLTLEMSESVVRRPILDSLNCSKSSAKDHLERSFWCEKYVDEIQGMSMQ
T01H8.1	T01H8.1b	2667	2	1258	1399	no	1	153	2334	MQLWRRESLSQSLSDLYQQQKQIHSLMTMRFSRKLEMVHIRWFTSAK
T01H8.1	T01H8.1b	2668	2	2062	2284	no	1	153	2334	MSIQIEESQQNKHCNISGSDKRKHFRIGQFNQNKLESLICKMSRLHLSRHIKQSHRLQVFNFVQLDRLHLRNDE
T01H8.1	T01H8.1b	2669	3	2333	2495	no	1	153	2334	MNRPINVKFLPTAHQNVPSRRLVNTSIHFYARILLFSFLNTTNIYPIVSTNAPH
T01H8.1	T01H8.1a	2671	2	73	220	no	1	0	2352	MYHQALISARITGWMSQCDRIQRIVLVTPPTPFTAASTSFNHRQIMDFD
T01H8.1	T01H8.1a	2672	2	1897	2017	no	1	0	2352	MSGPLEFYFTQCSPAALRSRWVQMIHLIRYYNVLEMERFQ
T01H8.1	T01H8.1a	2673	2	712	868	no	1	0	2352	MLMVTSKSQISGSAKKQSIVRRKLIVSVEQWNIWLQKLLIGVDIQWLQISGL
T01H8.1	T01H8.1a	2674	2	1276	1417	no	1	0	2352	MQLWRRESLSQSLSDLYQQQKQIHSLMTMRFSRKLEMVHIRWFTSAK
T01H8.1	T01H8.1a	2675	2	2335	2476	no	1	0	2352	MCQQMHEPTDQCQILANRSPKCTVETTCKYIDSFLRTDFTFFFFKYY
T01H8.1	T01H8.1a	2676	2	271	403	no	1	0	2352	MSESVVRRPILDSLNCSKSSAKDHLERSFWCEKYVDEIQGMSMQ
T01H8.1	T01H8.1a	2677	2	2080	2302	no	1	0	2352	MSIQIEESQQNKHCNISGSDKRKHFRIGQFNQNKLESLICKMSRLHLSRHIKQSHRLQVFNFVQLDRLHLRNDE
T01H8.1	T01H8.1a	2678	3	2351	2513	no	1	0	2352	MNRPINVKFLPTAHQNVPSRRLVNTSIHFYARILLFSFLNTTNIYPIVSTNAPH
C43E11.8	C43E11.8	2682	2	229	355	no	1	0	1890	MCSRCIFRTGNCKRNSIISNVSSIQLTLLFNFTEKLALLRMQ
C43E11.8	C43E11.8	2683	2	1006	1141	no	1	0	1890	MRKILELFHFFRYFIFCLKIMQDSITWLRTVLEMFNSTLSCVSYK
T04D1.4	T04D1.4	2685	1	9384	9510	no	1	141	9042	MYFLIQPTLSHRNSPSIHSCFINVISGIYLLSSTLPPYTAPL
T04D1.4	T04D1.4	2686	2	3781	3949	no	1	141	9042	MPKIAFSPTKWVSERLFKPSLSCHEFMIMEFMDLSWLLFHFQPFKIGFENSKLGLI
T04D1.4	T04D1.4	2687	2	4417	4552	no	1	141	9042	MLRNHWDQKRKRLLKFNSQICKRSFIVLFSRGISVICAKELVLLL
T04D1.4	T04D1.4	2688	2	6937	7114	no	1	141	9042	MIAILKIRRIWQLLQQLKLNSFDSNNNNSNNSRRLQLLRALLHPGRRVGNDRITIMMLR
T04D1.4	T04D1.4	2689	2	631	859	no	1	141	9042	MDHHRKDNIHHRHKHLRTINKCTINNELNNNKPANNKPKGHPDMVHMVMHHRHPLDIHHHPPNNHRMLHKRDLLHR
T04D1.4	T04D1.4	2690	2	8251	8590	no	1	141	9042	MPIQTTTYTRTVLYLLICHLEVHTVIVSEMLLPPLLRLYHQHLLRQLRRQLQMLNLWLWLLHSRFNKLSKHRQRQLPANLEVQPPQLKQQQPKQPLLNKMRSQSNNWKCSKCK
T04D1.4	T04D1.4	2691	2	6064	6184	no	1	141	9042	MNGLWWKISMLNGLISSYLKCRLSQRLSLKDGILTVISAS
T04D1.4	T04D1.4	2692	2	3223	3427	yes	1	141	9042	MEKMEKALETENLQNQRLNLKPTRLKRKKLSNFLLNGKDDHMFIVNGKLPQNFWKLISELKRKSKDSK
T04D1.4	T04D1.4	2693	2	6748	6934	no	1	141	9042	MTRSSWRFVISVDWISWQLMCSISLLSPRSYVHQKLHFFDVFLKSLQQSSLANGVELLTWKL
T04D1.4	T04D1.4	2694	2	5245	5395	no	1	141	9042	MRRMNLRSSMRKISRLFCNEEPRQSRWKLVKKDPYSRRLLSIRVIIRVMT
T04D1.4	T04D1.4	2695	2	1447	2092	yes	1	141	9042	MVTEVRDLEPAPLKARNLLCRLSQLRLCKNHRFQMLHRLRWNQRNHRRISNSIMEWRMVLEIRMLSNNSSIRCMHSINSSSSSMLNISRTCLDILNSSNNLNILTSINSLLRSQCNIILSNIHPNIKPNPTNNSSSTHPDTVSVLVRRRLQWNHHNQWINQHHRVKPKFRQLLLHRHHLNSRTPTRSFLIFHRRQDIKSLLLLLKPYHLHLYLIR
T04D1.4	T04D1.4	2696	2	5404	5863	no	1	141	9042	MILNSGRNGLKRRKLMWKRQLQHLMDVNSSLKNQENVLNDSRRTRTKEILMEVKNLEIGNVVLLRNGRDEEEMMKMETIREVIVLMSWRQVRLNISKLRRSSHSMDGEDGQRLRNMENLRFLNKILSICRELCCFIVFESFEETIEFVNLSST
T04D1.4	T04D1.4	2697	3	9197	9449	no	1	141	9042	MFIRTHFSHVMGNLPGRDFTLQIEKTNWCKSFPLRKLSLYLFFHFSLSFQSGNFIFRQDVRFYVFFDSTYSLTPKLSFYPFLFY
T22C1.6	T22C1.6	2699	2	742	883	yes	1	222	1227	MERPRIWRLSCLQQSLNLHRFKLRNQEWKKMNWRRLCWKKQLVLVEH
D1081.4	D1081.4	2701	2	31	211	no	1	0	663	MQNHGVIDGRIRLRLQFWEQKELVNQRWFHNFYGINLWRTIVQLSKNLIGLNMKLKKEEF
F22G12.5	F22G12.5b.2	2703	1	1197	1353	no	2	463	4264	MLGRMASEPRFCTESLYRRPAHAGARRVYTGDEGLPKTADLFVEKSVGQAFV
F22G12.5	F22G12.5b.2	2704	3	476	599	yes	2	463	4264	MENRKSSDDSSNHISRIRWLVSNLCHTRRRSTRPFAGICRH
F22G12.5	F22G12.5b.2	2705	3	4073	4244	no	2	463	4264	MHRQSEVINRRIMKFLFPHLTQCMNDFKRSLEHLYAEASNLMDLHNSRHVPQCTYWI
F22G12.5	F22G12.5b.2	2706	3	1583	1745	no	2	463	4264	MCNNSHGEARYERQAQCLPRRRRLPGHRRCLHRRLRVERQFHLHHRRRHLLWRN
F22G12.5	F22G12.5b.2	2707	3	3860	4019	no	2	463	4264	MRRQMDDNWMSRGCSSCYRVPCYRQSTPDRSPTQKCSRKKNNEKDMETMGLSS
F22G12.5	F22G12.5b.2	2708	3	3506	3857	no	2	463	4264	MYRLRMLNHLYLPQLELPINTETTSSCTQISLNSRTSVQQLKTNEKCQKSRQFMSNVSNELFSEYLHPRFLKILELPPVSRQLGVGFPLFQCTLNSSHRWNSLVRSLIRKPNKLEKR
F22G12.5	F22G12.5b.2	2709	3	2462	2621	no	2	463	4264	MRLLRDTLRVKFSRKVCLLRAPRSINRLQRGKVSPVNDSVGLEVRLGSRWLDC
F22G12.5	F22G12.5b.1	2711	1	2454	2613	no	3	455	4256	MRLLRDTLRVKFSRKVCLLRAPRSINRLQRGKVSPVNDSVGLEVRLGSRWLDC
F22G12.5	F22G12.5b.1	2712	1	1575	1737	no	3	455	4256	MCNNSHGEARYERQAQCLPRRRRLPGHRRCLHRRLRVERQFHLHHRRRHLLWRN
F22G12.5	F22G12.5b.1	2713	1	3852	4011	no	3	455	4256	MRRQMDDNWMSRGCSSCYRVPCYRQSTPDRSPTQKCSRKKNNEKDMETMGLSS
F22G12.5	F22G12.5b.1	2714	1	4065	4236	no	3	455	4256	MHRQSEVINRRIMKFLFPHLTQCMNDFKRSLEHLYAEASNLMDLHNSRHVPQCTYWI
F22G12.5	F22G12.5b.1	2715	1	3498	3849	no	3	455	4256	MYRLRMLNHLYLPQLELPINTETTSSCTQISLNSRTSVQQLKTNEKCQKSRQFMSNVSNELFSEYLHPRFLKILELPPVSRQLGVGFPLFQCTLNSSHRWNSLVRSLIRKPNKLEKR
F22G12.5	F22G12.5b.1	2716	1	468	591	yes	3	455	4256	MENRKSSDDSSNHISRIRWLVSNLCHTRRRSTRPFAGICRH
F22G12.5	F22G12.5b.1	2717	2	175	529	yes	3	455	4256	MVKSKSSSPPSDLLHHPRSCSPIADSLQRSHSLEDPDQNPHMKHLLQSIRLLSDVPFDRLLVYLPIVLGRLFAILPQAPTEQLAIATLNLDLRHVLSKWKTASRPTIRQITFLGFGGS
F22G12.5	F22G12.5b.1	2718	2	1189	1345	no	3	455	4256	MLGRMASEPRFCTESLYRRPAHAGARRVYTGDEGLPKTADLFVEKSVGQAFV
F22G12.5	F22G12.5a	2720	2	1024	1360	no	1	0	7008	MSTRLPRHHPPRWVVEDQKEPTRRVLDQKIAQILVPAKCNHGVAEIPPPELFSHQLSTVGTCSHCIIVSSLFHNLHTNRPQFCRETPRNVAQQMLQFSAQCRRLKCEKPVAH
F22G12.5	F22G12.5a	2721	2	6604	6763	no	1	0	7008	MRRQMDDNWMSRGCSSCYRVPCYRQSTPDRSPTQKCSRKKNNEKDMETMGLSS
F22G12.5	F22G12.5a	2722	2	4327	4489	no	1	0	7008	MCNNSHGEARYERQAQCLPRRRRLPGHRRCLHRRLRVERQFHLHHRRRHLLWRN
F22G12.5	F22G12.5a	2723	2	5206	5365	no	1	0	7008	MRLLRDTLRVKFSRKVCLLRAPRSINRLQRGKVSPVNDSVGLEVRLGSRWLDC
F22G12.5	F22G12.5a	2724	2	6817	6988	no	1	0	7008	MHRQSEVINRRIMKFLFPHLTQCMNDFKRSLEHLYAEASNLMDLHNSRHVPQCTYWI
F22G12.5	F22G12.5a	2725	2	3220	3343	yes	1	0	7008	MENRKSSDDSSNHISRIRWLVSNLCHTRRRSTRPFAGICRH
F22G12.5	F22G12.5a	2726	2	2659	2911	no	1	0	7008	MMNRNLHCLWRLICHRITIDRSRREWEKGTKPSQKSAGLTKSLYSVFVSAWSLPYSPLTRSFRHSSRHAIGSPLRESSETLRIV
F22G12.5	F22G12.5a	2727	2	6250	6601	no	1	0	7008	MYRLRMLNHLYLPQLELPINTETTSSCTQISLNSRTSVQQLKTNEKCQKSRQFMSNVSNELFSEYLHPRFLKILELPPVSRQLGVGFPLFQCTLNSSHRWNSLVRSLIRKPNKLEKR
F22G12.5	F22G12.5a	2728	3	362	509	no	1	0	7008	MRNSSSNGEAERYKTGEMASDTRSSAILYHRSSIDCVQLFEVFRRLFGE
F22G12.5	F22G12.5a	2729	3	3941	4097	no	1	0	7008	MLGRMASEPRFCTESLYRRPAHAGARRVYTGDEGLPKTADLFVEKSVGQAFV
F22G12.5	F22G12.5a	2730	3	1145	1334	yes	1	0	7008	MAWPKFRRPSSSATNCRPSEHVLIVLSSPASSTISTRIVHNFAGKLLETWLSRCSNFQLNVAG
F22G12.5	F22G12.5a	2731	3	980	1112	no	1	0	7008	MLGTRHKRHRIEASGCQRGCHVIIHLGGWWKIKRSRHGEYWIRR
T24D1.3	T24D1.3	2733	1	363	555	no	3	71	1118	MQTLNRRDLEILADAYIILQIKSRQHPIHSQRYLLLFSNQNHLLKSVHHPHRQRLRFFLQDCWA
T24D1.3	T24D1.3	2734	2	964	1180	no	3	71	1118	MCRYLVSQFVQTIVPALSSKMGKKAGRIEDVCDFCEKTVFSSSIQAPNNFQIICKFPLTHIVLCHITHLYCL
E03H4.3	E03H4.3	2736	2	673	913	no	1	0	966	MSTGVLMIGQRIVEWEGVWQEWESIQLTPEMTRDSIGSCRIGRVSRLQLRPGNSHLKNSSLFTGFHRTRCFYWMSFYIQN
M01A10.2	M01A10.2e	2738	2	2065	2248	no	1	78	3462	MQQVLLSLQSVWKLQNGLSASRNNDHSMHDVHNCSRLNQSWKMDLFPEVILNGNLHHLVVN
M01A10.2	M01A10.2e	2739	2	2935	3115	no	1	78	3462	MTLYVKKQHFPITDWVFTWQVKQRWKSTQCAPKLPSKQASHLENYLYHVKCQNSQKIIHS
M01A10.2	M01A10.2e	2740	2	784	925	no	1	78	3462	MDVRFLLEMSMDQYLCIIIKNQRRLYKERLHMVQAHVDQFNRSNGSI
M01A10.2	M01A10.2e	2741	3	1316	1496	yes	1	78	3462	MASNWWIGKRMCNWTSGTCCNRSQRWVTQILARNGRASTDSIQTEIFVSFRATRRNGDFR
M01A10.2	M01A10.2e	2742	3	2945	3080	no	1	78	3462	MSKNSIFRSRIGCLHGKSNRDGKVHNVLRNCRANRRVTWRTICTM
M01A10.2	M01A10.2e	2743	3	614	734	no	1	78	3462	MSGTSGSSTPIGGITSRKYKTINSIRQGNSCSMEFRNKRS
M01A10.2	M01A10.2b	2745	2	79	214	no	3	17	596	MSKNSIFRSRIGCLHGKSNRDGKVHNVLRNCRANRRVTWRTICTM
M01A10.2	M01A10.2d	2747	2	2647	2827	no	1	0	3174	MTLYVKKQHFPITDWVFTWQVKQRWKSTQCAPKLPSKQASHLENYLYHVKCQNSQKIIHS
M01A10.2	M01A10.2d	2748	2	601	742	no	1	0	3174	MDVRFLLEMSMDQYLCIIIKNQRRLYKERLHMVQAHVDQFNRSNGSI
M01A10.2	M01A10.2d	2749	3	431	551	no	1	0	3174	MSGTSGSSTPIGGITSRKYKTINSIRQGNSCSMEFRNKRS
M01A10.2	M01A10.2d	2750	3	2657	2792	no	1	0	3174	MSKNSIFRSRIGCLHGKSNRDGKVHNVLRNCRANRRVTWRTICTM
M01A10.2	M01A10.2d	2751	3	1133	1313	yes	1	0	3174	MASNWWIGKRMCNWTSGTCCNRSQRWVTQILARNGRASTDSIQTEIFVSFRATRRNGDFR
M01A10.2	M01A10.2a	2753	2	2065	2248	no	1	78	3450	MQQVLLSLQSVWKLQNGLSASRNNDHSMHDVHNCSRLNQSWKMDLFPEVILNGNLHHLVVN
M01A10.2	M01A10.2a	2754	2	2923	3103	no	1	78	3450	MTLYVKKQHFPITDWVFTWQVKQRWKSTQCAPKLPSKQASHLENYLYHVKCQNSQKIIHS
M01A10.2	M01A10.2a	2755	2	784	925	no	1	78	3450	MDVRFLLEMSMDQYLCIIIKNQRRLYKERLHMVQAHVDQFNRSNGSI
M01A10.2	M01A10.2a	2756	3	2933	3068	no	1	78	3450	MSKNSIFRSRIGCLHGKSNRDGKVHNVLRNCRANRRVTWRTICTM
M01A10.2	M01A10.2a	2757	3	1316	1496	yes	1	78	3450	MASNWWIGKRMCNWTSGTCCNRSQRWVTQILARNGRASTDSIQTEIFVSFRATRRNGDFR
M01A10.2	M01A10.2a	2758	3	614	734	no	1	78	3450	MSGTSGSSTPIGGITSRKYKTINSIRQGNSCSMEFRNKRS
M01A10.2	M01A10.2c	2760	2	601	742	no	1	0	3633	MDVRFLLEMSMDQYLCIIIKNQRRLYKERLHMVQAHVDQFNRSNGSI
M01A10.2	M01A10.2c	2761	2	3106	3286	no	1	0	3633	MTLYVKKQHFPITDWVFTWQVKQRWKSTQCAPKLPSKQASHLENYLYHVKCQNSQKIIHS
M01A10.2	M01A10.2c	2762	3	431	551	no	1	0	3633	MSGTSGSSTPIGGITSRKYKTINSIRQGNSCSMEFRNKRS
M01A10.2	M01A10.2c	2763	3	3116	3251	no	1	0	3633	MSKNSIFRSRIGCLHGKSNRDGKVHNVLRNCRANRRVTWRTICTM
M01A10.2	M01A10.2c	2764	3	1133	1313	yes	1	0	3633	MASNWWIGKRMCNWTSGTCCNRSQRWVTQILARNGRASTDSIQTEIFVSFRATRRNGDFR
M01A10.2	M01A10.2f	2766	2	2065	2248	no	1	78	3477	MQQVLLSLQSVWKLQNGLSASRNNDHSMHDVHNCSRLNQSWKMDLFPEVILNGNLHHLVVN
M01A10.2	M01A10.2f	2767	2	2950	3130	no	1	78	3477	MTLYVKKQHFPITDWVFTWQVKQRWKSTQCAPKLPSKQASHLENYLYHVKCQNSQKIIHS
M01A10.2	M01A10.2f	2768	2	784	925	no	1	78	3477	MDVRFLLEMSMDQYLCIIIKNQRRLYKERLHMVQAHVDQFNRSNGSI
M01A10.2	M01A10.2f	2769	3	2960	3095	no	1	78	3477	MSKNSIFRSRIGCLHGKSNRDGKVHNVLRNCRANRRVTWRTICTM
M01A10.2	M01A10.2f	2770	3	2378	2513	no	1	78	3477	MSLGWNICRCFPRFEFNTARRSLHFYNRRRTIGSRPKTLLLRYCC
M01A10.2	M01A10.2f	2771	3	1316	1496	yes	1	78	3477	MASNWWIGKRMCNWTSGTCCNRSQRWVTQILARNGRASTDSIQTEIFVSFRATRRNGDFR
M01A10.2	M01A10.2f	2772	3	614	734	no	1	78	3477	MSGTSGSSTPIGGITSRKYKTINSIRQGNSCSMEFRNKRS
W03D8.10	W03D8.10	2774	3	179	332	no	1	0	774	MVFDSSSRSRDCQHYWWICALANLWNLHWKRWCCNSRLSCSPRSRCILFEC
[truncated: 59,924 more rows]

## Sheet: homologs with human
Caenorhabditis elegans			Homo sapiens								Caenorhabditis elegans		Homo sapiens
gene symbol	mRNA accession	altorf id	gene symbol	mRNA accession	altorf id	% id	% similarity	length	mismatch	opengap	start	stop	start	stop	evalue	bit score
B0272.1	B0272.1	82677	TUBB2A	NM_001069	10953	45.33	52	75	41	0	1	75	12	86	2e-11	55.1
B0280.12	B0280.12b,B0280.12a	41747;41750	GRIA1	NM_000827,NM_001114183	93060;93089	45	57.5	40	22	0	16	55	21	60	3e-05	36.6
C03B1.10	C03B1.10	80700	SLC6A17	NM_001010898	117353	68.97	75.86	29	7	1	10	38	1	27	7e-08	45.4
C06A1.1	C06A1.1.2,C06A1.1.1	29060;29066	VCP	NM_007126	136878	49.12	61.4	57	29	0	137	193	12	68	5e-08	48.1
C18A3.6	C18A3.6a,C18A3.6b.2,C18A3.6b.1	16190;16192;16195	RAB3B	NM_002867	134333	39.71	54.41	68	41	0	1	68	1	68	5e-06	39.3
C18C4.10	C18C4.10b.4,C18C4.10a.1,C18C4.10c.1,C18C4.10b.3,C18C4.10a.2,C18C4.10b.1,C18C4.10b.2,C18C4.10c.3,C18C4.10d.1,C18C4.10c.2,C18C4.10d.2,C18C4.10d.3,C18C4.10d.4,C18C4.10c.4	75555;75560;75562;75566;75572;75574;75580;75582;75586;75592;75596;75598;75603;75607	KLC3	NM_177417	24822	36.73	48.98	49	31	0	44	92	1	49	1e-05	39.7
C27A12.7	C27A12.7a.2,C27A12.7a.1,C27A12.7b.1,C27A12.7b.2,C27A12.7b.3,C27A12.7a.3,C27A12.7b.4	4292;4297;4301;4306;4312;4317;4325	ARIH1	NM_005744	25947	33.33	46.15	78	52	0	1	78	1	78	4e-06	40
C34C12.3	C34C12.3	35382	PPP2CA	NM_002715	93379	50	52.38	42	21	0	16	57	3	44	4e-05	37.7
C34E10.6	C34E10.6.2,C34E10.6.3,C34E10.6.1	34927;34932;34936	ATP5B	NM_001686	81008	44.07	61.02	59	32	1	2	60	3	60	3e-08	45.4
C34H3.2	C34H3.2	81442	OSR1	NM_145260	133041	41.67	51.67	60	35	0	1	60	1	60	2e-06	40.8
C36E8.5	C36E8.5.1,C36E8.5.2,C36E8.5.3	31487;31493;31497	TUBB2A	NM_001069	10953	53.57	58.93	56	26	0	1	56	34	89	1e-11	55.1
C39F7.4	C39F7.4.2,C39F7.4.1	66441;66446	RAB1B	NM_030981	65017	42.03	49.28	69	40	0	1	69	1	69	1e-05	38.1
C44B11.3	C44B11.3	37782	TUBA1B	NM_006082	145757	62.5	71.88	32	12	0	8	39	8	39	5e-06	38.9
C44B7.8	C44B7.8	16645	ABCD2	NM_005164	106696	50	60	40	20	0	1	40	8	47	3e-06	39.3
C44B7.9	C44B7.9	25754	ABCD3	NM_002858	152357	36.25	47.5	80	51	0	2	81	23	102	3e-08	47
C47B2.3	C47B2.3.1,C47B2.3.3,C47B2.3.2	10299;10304;10309	TUBA3D	NM_080386	93893	47.12	52.88	104	55	0	30	133	3	106	1e-08	48.9
C49H3.5	C49H3.5a.2,C49H3.5a.1	57961;57965	CNOT4	NM_001008225,NM_013316	12755;23188	50	60.87	46	23	0	18	63	1	46	9e-08	43.9
C51E3.7	C51E3.7c.3,C51E3.7a,C51E3.7c.2,C51E3.7c.1	69951;69959;69965;69969	PCSK2	NM_002594	152404	37.8	41.46	82	51	0	1	82	1	82	2e-05	38.9
C52E4.4	C52E4.4.2,C52E4.4.1	63384;63387	PSMC2	NM_002803	15712	60.61	68.18	66	26	0	59	124	1	66	3e-08	47
C54C6.2	C54C6.2	36698	TUBB2A	NM_001069	10953	50	56.82	88	44	0	1	88	1	88	6e-20	78.2
D1037.4	D1037.4	12968	RAB8A	NM_005370	130616	50	55.77	52	26	0	24	75	1	52	3e-09	48.5
E01H11.1	E01H11.1b,E01H11.1a,E01H11.1d,E01H11.1c	82193;82197;82201;82204	PRKCA	NM_002737	136199	46.43	58.93	56	30	0	1	56	1	56	2e-08	47
F01G12.5	F01G12.5b.2,F01G12.5b.1,F01G12.5a.2,F01G12.5a.1	88113;88127;88143;88157	COL4A5	NM_033381,NM_000495,NM_033380	86547;87674;102150	30.71	35	140	86	1	48	187	1	129	3e-07	47
F01G12.5	F01G12.5b.2,F01G12.5b.1,F01G12.5a.2,F01G12.5a.1	88115;88129;88146;88161	COL11A1	NM_001854,NM_080630,NM_080629	101017;101045;101066	42	60	50	27	1	12	59	10	59	6e-06	40
F09E5.1	F09E5.1.2,F09E5.1.1	24834;24842	PRKCI	NM_002740	144915	52.5	60	40	19	0	1	40	1	40	4e-05	35.8
F11A6.1	F11A6.1b,F11A6.1a.2,F11A6.1a.1	5859;5863;5867	PCSK5	NM_006200	39439	35.14	39.64	111	72	0	4	114	46	156	2e-06	43.9
F16D3.1	F16D3.1	14778	TUBA1B	NM_006082	145759	33.33	43.48	69	46	0	1	69	1	69	6e-07	42.4
F16D3.1	F16D3.1	14779	TUBA3C	NM_006001	18146	40.54	51.35	74	44	0	1	74	1	74	2e-08	46.2
F21F8.5	F21F8.5	72503	CTSE	NM_148964	57207	58.06	80.65	31	13	0	12	42	46	76	1e-07	43.1
F22H10.6	F22H10.6	80207	CTC1	NM_025099	59949	83.33	83.33	18	3	0	23	40	26	43	8e-05	36.6
F26D10.10	F26D10.10	58543	GLUL	NM_002065,NM_001033044,NM_001033056	115823;115831;115836	35.44	48.1	79	51	0	13	91	13	91	4e-06	41.2
F26E4.8	F26E4.8a.2,F26E4.8b,F26E4.8a.1	3192;3195;3197	TUBA1A	NM_006009	117242	32.86	51.43	70	47	0	79	148	2	71	4e-06	42
F27D4.5	F27D4.5.1,F27D4.5.2	15350;15352	BCKDHB	NM_183050,NM_000056	107733;107737	46.34	57.32	82	44	0	10	91	1	82	6e-09	48.9
F27D9.5	F27D9.5.2,F27D9.5.1	92660;92668	PC	NM_022172,NM_000920,NM_001040716	57078;57097;57176	51.06	55.32	47	23	0	1	47	1	47	7e-06	38.5
F27D9.5	F27D9.5.2,F27D9.5.1	92663;92666	PCCA	NM_001127692,NM_000282	109712;109955	40.28	48.61	72	43	0	1	72	1	72	6e-05	36.6
F27E5.2	F27E5.2	30249	GPR21	NM_005294	17593	43.75	62.5	32	18	0	9	40	50	81	6e-05	35.8
F28C1.2	F28C1.2c,F28C1.2b,F28C1.2a	63753;63757;63763	RGS7	NM_002924	65938	38.83	48.54	103	63	0	1	103	8	110	1e-14	64.7
F29D11.1	F29D11.1	14961	LRP2	NM_004525	56214	45.33	52	75	40	1	86	159	29	103	2e-06	44.3
F29D11.1	F29D11.1	14959	LRP1B	NM_018557	107297	38.89	58.33	72	42	1	33	104	1	70	1e-06	43.5
F29F11.6	F29F11.6b,F29F11.6a	62365;62369	PPP1CA	NM_002708,NM_206873,NM_001008709	116750;116778;118608	43.94	53.03	66	37	0	28	93	16	81	3e-09	50.1
F31E3.1	F31E3.1.1,F31E3.1.2	35676;35678	PBX3	NM_006195,NM_001134778	67538;67565	40.98	52.46	61	36	0	18	78	1	61	1e-07	44.3
F32H2.9	F32H2.9	11802	TUBA1A	NM_006009	117242	45.95	64.86	37	20	0	1	37	1	37	6e-05	36.2
F41F3.4	F41F3.4	61774	COL22A1	NM_152888,XM_002346125	20823;1285	30.07	46.15	143	75	4	74	195	53	191	9e-06	44.7
F43E2.8	F43E2.8.1,F43E2.8.2	20059;20061	HSPA5	NM_005347	146574	45.83	47.92	48	26	0	1	48	1	48	7e-05	35.4
F44F4.11	F44F4.11	20432	TUBA3C	NM_006001	18146	36.99	49.32	73	44	1	1	71	1	73	0.0001	35.8
F44F4.11	F44F4.11	20433	TUBA8	NM_018943	19499	57.78	60	45	19	0	8	52	16	60	4e-08	45.1
F45G2.2	F45G2.2a	39992	MYH15	NM_014981	87885	61.11	83.33	36	14	0	1	36	35	70	3e-09	47.8
F46F11.1	F46F11.1b.2,F46F11.1a.2,F46F11.1a.1,F46F11.1b.1	10067;10075;10081;10090	PPIP5K2	NM_015216	58859	48.08	63.46	52	27	0	36	87	1	52	2e-08	47
F48F7.1	F48F7.1a,F48F7.1b	87983;87987	EIF2C1	NM_012199	72715	43.4	60.38	53	30	0	70	122	4	56	1e-05	40
F54D8.1	F54D8.1.1,F54D8.1.2	40470;40473	COL5A1	NM_000093	151719	31.25	53.13	96	56	3	170	258	47	139	9e-05	42
F56C9.1	F56C9.1.1,F56C9.1.2	37078;37082	PPP1CA	NM_002708,NM_206873,NM_001008709	116750;116778;118608	52.24	61.19	67	32	0	16	82	16	82	1e-11	56.6
F59B2.7	F59B2.7.1,F59B2.7.2	36462;36467	RAB6A	NM_002869	116687	51.22	60.98	41	20	0	1	41	1	41	4e-08	44.3
H28O16.1	H28O16.1d.4,H28O16.1c,H28O16.1a,H28O16.1d.1,H28O16.1d.6,H28O16.1d.5,H28O16.1d.3,H28O16.1d.2	11417;11422;11425;11432;11436;11444;11447;11455	ATP5A1	NM_004046,NM_001001937	116847;116967	68.29	73.17	41	13	0	1	41	1	41	1e-11	53.5
JC8.3	JC8.3c.7	50629	ANKRD16	NM_019046	139601	44.68	65.96	47	26	0	50	96	5	51	1e-07	44.3
JC8.3	JC8.3c.1,JC8.3c.2	50632;50642	ANKRD16	NM_019046	139601	47.92	68.75	48	22	1	50	97	5	49	2e-07	44.3
K01G5.7	K01G5.7.2,K01G5.7.1	31063;31069	TUBB4Q	NM_020040	10338	41.86	53.49	86	50	0	1	86	1	86	4e-14	62.8
M01D7.7	M01D7.7a,M01D7.7b	10959;10962	GNA14	NM_004297	69633	50	60.87	46	23	0	40	85	7	52	1e-08	47.4
M02B7.3	M02B7.3b,M02B7.3a	47055;47061	KIF3B	NM_004798	134604	50	69.05	42	21	0	1	42	1	42	7e-06	38.5
M03F8.3	M03F8.3b,M03F8.3a	74825;74831	CRNKL1	NM_016652	36304	45.76	61.02	59	32	0	5	63	9	67	1e-07	43.9
M7.1	M7.1.1,M7.1.2	54106;54109	UBE2D1	NM_003338	62494	46	54	50	27	0	1	50	1	50	9e-05	35.4
M79.1	M79.1b,M79.1c,M79.1a	90846;90849;90856	ABL2	NM_005158,NM_001136000,NM_001136001,NM_007314,NM_001100108	130723;130953;131017;131172;131250	48.21	58.93	56	29	0	1	56	1	56	3e-08	46.2
R05D3.7	R05D3.7	44626	KIF5B	NM_004521	140661	50	58.33	48	24	0	25	72	4	51	1e-08	46.6
R09E12.3	R09E12.3	69436	STIP1	NM_006819	85819	54.55	63.64	44	20	0	22	65	5	48	5e-06	39.3
R10E11.1	R10E11.1c,R10E11.1a,R10E11.1b	40968;40982;40996	CREBBP	NM_004380,NM_001079846	112315;112367	44.68	63.83	47	26	0	33	79	1	47	1e-06	41.2
T01C8.1	T01C8.1b,T01C8.1c.1,T01C8.1c.2,T01C8.1a	90057;90062;90064;90069	PRKAA2	NM_006252	89236	62.07	65.52	29	11	0	24	52	11	39	6e-05	36.2
T04C12.5	T04C12.5.2,T04C12.5.1	64094;64096	ACTG1	NM_001614	96103	47.92	52.08	48	25	0	1	48	1	48	2e-06	41.2
T05A1.5	T05A1.5b,T05A1.5a	57104;57110	SLC22A20	NM_001004326	82939	23.33	48.67	150	111	2	17	166	73	218	6e-07	46.6
T05H4.6	T05H4.6.1,T05H4.6.2	61640;61643	ETF1	NM_004730	116990	63.64	72.73	33	12	0	9	41	9	41	2e-05	37
T10H10.1	T10H10.1	80999	MYH15	NM_014981	87885	51.92	65.38	52	25	0	15	66	11	62	1e-11	54.7
T11B7.3	T11B7.3a	47447	COL22A1	NM_152888,XM_002346125	20823;1285	28.81	42.37	177	93	6	1	149	31	202	3e-05	42.4
T12A2.2	T12A2.2.2,T12A2.2.3,T12A2.2.1	44003;44009;44015	STT3A	NM_152713	73279	36.78	49.43	87	55	0	27	113	1	87	2e-12	59.3
T14G12.4	T14G12.4b.2	83581	LOC100288524	XM_002342707	121020	44.83	63.79	58	32	0	48	105	21	78	1e-08	48.5
T14G12.4	T14G12.4b.1	83584	LOC100288524	XM_002342707	121020	44.83	63.79	58	32	0	53	110	21	78	1e-08	48.9
T15H9.6	T15H9.6	24845	PAPOLG	NM_022894	44680	48.78	58.54	41	21	0	27	67	1	41	2e-05	37.7
T16H12.5	T16H12.5b.1,T16H12.5b.2,T16H12.5a	34656;34662;34667	SPOP	NM_001007226,NM_003563,NM_001007227,NM_001007228,NM_001007229,NM_001007230	81391;81398;81535;81546;81551;81558	50	63.64	44	22	0	1	44	1	44	1e-08	45.8
T21B10.2	T21B10.2a.3,T21B10.2a.1,T21B10.2a.2,T21B10.2c.2,T21B10.2b.1,T21B10.2c.1,T21B10.2b.2,T21B10.2b.3	22963;22967;22970;22974;22978;22981;22985;22988	ENO1	NM_001428	149242	47.06	50	68	36	0	1	68	1	68	4e-06	40.8
T22C1.7	T22C1.7	13022	JPH1	NM_020647	77595	33.8	43.66	71	47	0	3	73	17	87	9e-07	43.5
T28D6.2	T28D6.2	31844	TUBA4A	NM_006000	74838	40.66	50.55	91	54	0	25	115	43	133	5e-08	47.4
T28D6.2	T28D6.2	31843	TUBA4A	NM_006000	74840	64.29	69.05	42	15	0	1	42	1	42	2e-11	53.9
W06H8.1	W06H8.1d	74336	EHD3	NM_014600	11231	35.29	45.59	68	44	0	17	84	15	82	2e-07	44.7
Y116A8C.34	Y116A8C.34a.3,Y116A8C.34a.1,Y116A8C.34a.2	51929;51931;51933	PPIG	NM_004792	63277	42.62	50.82	61	35	0	6	66	35	95	8e-06	39.3
Y16B4A.1	Y16B4A.1.2,Y16B4A.1.1	88972;88979	EBF4	NM_001110514	20591	40.48	52.38	42	25	0	19	60	31	72	3e-05	37.4
Y16B4A.1	Y16B4A.1.2,Y16B4A.1.1	88974;88983	EBF4	NM_001110514	20590	41.18	54.9	51	30	0	1	51	1	51	1e-05	38.5
Y22F5A.3	Y22F5A.3a	73158	SNAP25	NM_130811	143115	46.94	57.14	49	26	0	4	52	14	62	3e-06	39.3
Y38A10A.5	Y38A10A.5.1,Y38A10A.5.2	66892;66896	CALR	NM_004343	112098	49.06	67.92	53	27	0	96	148	1	53	1e-07	45.1
Y39A3CL.5	Y39A3CL.5b.1,Y39A3CL.5a.2,Y39A3CL.5b.2,Y39A3CL.5a.1	33872;33877;33883;33887	CAPN8	NM_001143962	133846	30.34	47.19	89	59	1	1	89	1	86	2e-08	47
Y39A3CL.5	Y39A3CL.5b.1,Y39A3CL.5b.2	33870;33882	CAPN3	NM_212467	88724	36.84	57.14	133	82	2	13	143	216	348	5e-24	97.4
Y46B2A.3	Y46B2A.3	15410	GIPC3	NM_133261	79898	21.73	37.38	313	215	5	23	317	14	314	8e-14	71.2
Y49E10.6	Y49E10.6b	37639	HIST1H2AG	NM_021064	3903	62.79	74.42	43	12	2	36	78	1	39	4e-09	48.9
Y54G9A.3	Y54G9A.3a,Y54G9A.3b,Y54G9A.3c	27840;27845;27850	KCNQ1	NM_000218	140963	44.59	58.11	74	34	1	4	70	89	162	5e-12	58.2
Y69A2AR.4	Y69A2AR.4	47276	SLC11A2	NM_000617	61060	48.65	62.16	37	19	0	1	37	1	37	1e-05	38.5
Y71F9AL.16	Y71F9AL.16	10322	ACTR3	NM_005721	107156	51.22	63.41	41	20	0	1	41	12	52	1e-06	41.6
Y71H2AM.1	Y71H2AM.1.1,Y71H2AM.1.2	33177;33182	SMCR7L	NM_019008	40856	48.48	72.73	33	17	0	7	39	10	42	8e-06	38.5
Y76A2B.3	Y76A2B.3	43324	ACSL6	NM_015256,NM_001009185	133482;133487	42.59	55.56	54	31	0	9	62	7	60	8e-05	37
ZC328.2	ZC328.2	4438	ZNF285	NM_152354	5189	33.33	54.17	72	48	0	5	76	189	260	9e-05	38.5
ZK1290.4	ZK1290.4a	20678	NFIB	NM_005596	92393	40.48	64.29	42	25	0	49	90	3	44	1e-05	38.9
ZK1290.4	ZK1290.4c,ZK1290.4b	20666;20672	NFIB	NM_005596	92393	37.78	64.44	45	28	0	14	58	3	47	2e-06	40
ZK154.3	ZK154.3	89836	TUBB2B	NM_178012	67588	45.24	54.76	84	46	0	1	84	1	84	2e-13	60.8
ZK328.2	ZK328.2	33243	EFTUD2	NM_004247,NM_001142605	52947;52952	46.94	57.14	49	21	1	1	49	1	44	7e-06	38.1
ZK688.8	ZK688.8.1,ZK688.8.2	30805;30808	GALNT13	NM_052917	74119	32.97	45.05	91	61	0	7	97	1	91	6e-05	38.1
ZK899.4	ZK899.4	88474	TUBA4A	NM_006000	74838	37.21	50	86	54	0	5	90	48	133	4e-07	43.5
ZK909.2	ZK909.2g,ZK909.2f,ZK909.2m,ZK909.2h.1,ZK909.2a,ZK909.2h.2,ZK909.2l	4736;4738;4740;4742;4750;4754;4756	PRKACA	NM_002730,NM_207518	105955;106076	43.94	59.09	66	37	0	5	70	5	70	4e-07	44.3
